# Supplementary material
Source: PubMed Central journal article supplement (PMC5161616)
Supplement: NIHMS797563-supplement-1.pdf [file NIHMS797563-supplement-1.pdf]

# Catalytic Enantioselective 1,6-Conjugate Additions of Propargyl and Allyl Groups

Fanke Meng, Xiben Li, Sebastian Torker, Ying Shi, Xiao Shen & Amir H. Hoveyda

Department of Chemistry, Merkert Chemistry Center, Boston College, Chestnut Hill, Massachusetts 02467, USA

## SUPPLEMENTARY INFORMATION

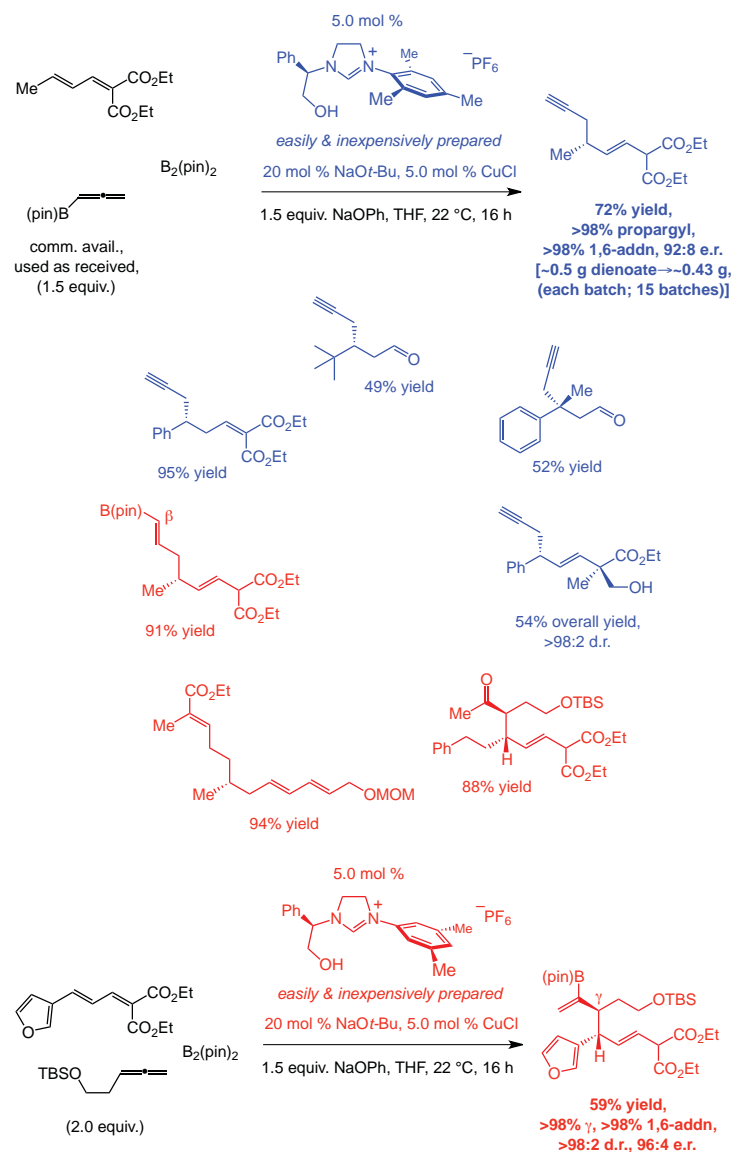

## Table of Contents

|                                                                                                                              |          |
|------------------------------------------------------------------------------------------------------------------------------|----------|
| <b>1. Extended Bibliography</b> .....                                                                                        | <b>5</b> |
| Additional citation regarding competition between 1,6- and 1,4-conjugate addition:.....                                      | 5        |
| Additional citations on catalytic enantioselective Claisen rearrangement processes: .....                                    | 5        |
| <b>2. Experimental</b> .....                                                                                                 | <b>7</b> |
| General .....                                                                                                                | 7        |
| Reagents and Ligands .....                                                                                                   | 7        |
| Imidazolium salts <b>9e</b> and <b>9g</b> .....                                                                              | 9        |
| NHC–Cu-Catalyzed Enantioselective Propargyl 1,6-Conjugate; Tertiary Centers .....                                            | 9        |
| ( <i>R,E</i> )-Diethyl 2-(3-phenylhex-1-en-5-yn-1-yl)malonate ( <b>4a</b> ).....                                             | 10       |
| Determination of Stereochemical Identity .....                                                                               | 10       |
| ( <i>R,E</i> )-Diethyl 2-(3-(2-methoxyphenyl)hex-1-en-5-yn-1-yl)malonate ( <b>4b</b> ).....                                  | 10       |
| ( <i>R,E</i> )-Diethyl 2-(3-( <i>o</i> -tolyl)hex-1-en-5-yn-1-yl)malonate ( <b>4c</b> ).....                                 | 11       |
| ( <i>R,E</i> )-Diethyl 2-(3-(naphthalen-1-yl)hex-1-en-5-yn-1-yl)malonate ( <b>4d</b> ).....                                  | 12       |
| ( <i>R,E</i> )-Diethyl 2-(3-(4-methoxyphenyl)hex-1-en-5-yn-1-yl)malonate ( <b>4e</b> ) .....                                 | 12       |
| ( <i>R,E</i> )-Diethyl 2-(3-(4-bromophenyl)hex-1-en-5-yn-1-yl)malonate ( <b>4f</b> ) .....                                   | 13       |
| ( <i>R,E</i> )-Diethyl 2-(3-(4-(trifluoromethyl)phenyl)hex-1-en-5-yn-1-yl)malonate ( <b>4g</b> ).....                        | 13       |
| ( <i>R,E</i> )-Diethyl 2-(3-(furan-3-yl)hex-1-en-5-yn-1-yl)malonate ( <b>4h</b> ).....                                       | 14       |
| ( <i>R,E</i> )-Diethyl 2-(3-(thiophen-3-yl)hex-1-en-5-yn-1-yl)malonate ( <b>4i</b> ) .....                                   | 15       |
| ( <i>R,E</i> )-Diethyl 2-(( <i>R,E</i> )-3-(( <i>E</i> )-styryl)hex-1-en-5-yn-1-yl)malonate ( <b>4j</b> ) .....              | 15       |
| ( <i>R,E</i> )-Diethyl 2-(3-phenethylhex-1-en-5-yn-1-yl)malonate ( <b>4k</b> ).....                                          | 16       |
| ( <i>S,E</i> )-Diethyl 2-(3-cyclohexylhex-1-en-5-yn-1-yl)malonate ( <b>4l</b> ).....                                         | 17       |
| ( <i>R,E</i> )-Diethyl 2-(3-( <i>tert</i> -butyl)hex-1-en-5-yn-1-yl)malonate ( <b>4m</b> ).....                              | 17       |
| Synthesis of Alkyl-Substituted Dienoates.....                                                                                | 18       |
| Representative Procedure for Alkylation of Diethyl Bromomalonate .....                                                       | 18       |
| ( <i>E</i> )-Diethyl 2-bromo-2-(5-phenylpent-2-en-1-yl)malonate ( <b>S1</b> ).....                                           | 19       |
| ( <i>E</i> )-Diethyl 2-bromo-2-(3-cyclohexylallyl)malonate ( <b>S2</b> ).....                                                | 19       |
| ( <i>E</i> )-Diethyl 2-bromo-2-(4,4-dimethylpent-2-en-1-yl)malonate ( <b>S3</b> ) .....                                      | 19       |
| Representative Procedure for Elimination of Bromo-malonates .....                                                            | 19       |
| ( <i>E</i> )-Diethyl 2-(5-phenylpent-2-en-1-ylidene)malonate ( <b>S4</b> ) .....                                             | 19       |
| ( <i>E</i> )-Diethyl 2-(3-cyclohexylallylidene)malonate ( <b>S5</b> ) .....                                                  | 20       |
| ( <i>E</i> )-Diethyl 2-(4,4-dimethylpent-2-en-1-ylidene)malonate ( <b>S6</b> ).....                                          | 20       |
| Synthesis of Dienoates with a Trisubstituted Alkene .....                                                                    | 20       |
| Representative Procedure for Alkylation of Diethyl Bromomalonate with Allyl Bromide.....                                     | 20       |
| ( <i>E</i> )-Diethyl 2-bromo-2-(3-(naphthalen-2-yl)but-2-en-1-yl)malonate ( <b>S7</b> ) .....                                | 20       |
| ( <i>E</i> )-Diethyl 2-bromo-2-(3-(4-bromophenyl)but-2-en-1-yl)malonate ( <b>S8</b> ).....                                   | 21       |
| ( <i>E</i> )-Diethyl 2-bromo-2-(3,7-dimethylocta-2,6-dien-1-yl)malonate ( <b>S9</b> ) .....                                  | 21       |
| Representative Procedure for Elimination of Bromomalonate .....                                                              | 21       |
| ( <i>E</i> )-Diethyl 2-(3-(naphthalen-2-yl)but-2-en-1-ylidene)malonate ( <b>S10</b> ).....                                   | 21       |
| ( <i>E</i> )-Diethyl 2-(3-(4-bromophenyl)but-2-en-1-ylidene)malonate ( <b>S11</b> ) .....                                    | 21       |
| ( <i>E</i> )-Diethyl 2-(3,7-dimethylocta-2,6-dien-1-ylidene)malonate ( <b>S12</b> ).....                                     | 22       |
| Representative Procedure for Catalytic Enantioselective 1,6-Conjugate Propargyl Additions; Quaternary<br>Carbon Centers..... | 22       |
| ( <i>R,E</i> )-Diethyl 2-(3-methyl-3-(naphthalen-2-yl)hex-1-en-5-yn-1-yl)malonate ( <b>10a</b> ).....                        | 22       |
| ( <i>R,E</i> )-Diethyl 2-(3-(4-bromophenyl)-3-methylhex-1-en-5-yn-1-yl)malonate ( <b>10b</b> ) .....                         | 23       |
| ( <i>R,E</i> )-Diethyl 2-(3,7-dimethyl-3-(prop-2-yn-1-yl)octa-1,6-dien-1-yl)malonate ( <b>10c</b> ) .....                    | 23       |
| Catalytic Multicomponent Cu–B Additions to Allenes/1,6-Conjugate Additions.....                                              | 24       |

|                                                                                                                                                                                                                         |    |
|-------------------------------------------------------------------------------------------------------------------------------------------------------------------------------------------------------------------------|----|
| ( <i>E</i> )-Diethyl 2-(4-(2-(( <i>tert</i> -butyldimethylsilyl)oxy)ethyl)-3-phenyl-5-(4,4,5,5-tetramethyl-1,3,2-dioxaborolan-2-yl)hexa-1,5-dien-1-yl)malonate ( <b>12a</b> ) .....                                     | 24 |
| Diethyl 2-((3 <i>S</i> ,4 <i>S</i> , <i>E</i> )-4-(2-(( <i>tert</i> -butyldimethylsilyl)oxy)ethyl)-3-(2-methoxyphenyl)-5-(4,4,5,5-tetramethyl-1,3,2-dioxaborolan-2-yl)hexa-1,5-dien-1-yl)malonate ( <b>12b</b> ).....   | 25 |
| Diethyl 2-((3 <i>S</i> ,4 <i>S</i> , <i>E</i> )-4-(2-(( <i>tert</i> -butyldimethylsilyl)oxy)ethyl)-5-(4,4,5,5-tetramethyl-1,3,2-dioxaborolan-2-yl)-3-( <i>o</i> -tolyl)hexa-1,5-dien-1-yl)malonate ( <b>12c</b> ) ..... | 26 |
| Diethyl 2-((3 <i>S</i> ,4 <i>S</i> , <i>E</i> )-4-(2-(( <i>tert</i> -butyldimethylsilyl)oxy)ethyl)-3-(naphthalen-1-yl)-5-(4,4,5,5-tetramethyl-1,3,2-dioxaborolan-2-yl)hexa-1,5-dien-1-yl)malonate ( <b>12d</b> ).....   | 27 |
| Diethyl 2-((3 <i>S</i> ,4 <i>S</i> , <i>E</i> )-3-(4-bromophenyl)-4-(2-(( <i>tert</i> -butyldimethylsilyl)oxy)ethyl)-5-(4,4,5,5-tetramethyl-1,3,2-dioxaborolan-2-yl)hexa-1,5-dien-1-yl)malonate ( <b>12e</b> ) .....    | 27 |
| Diethyl 2-((3 <i>S</i> ,4 <i>S</i> , <i>E</i> )-4-(2-(( <i>tert</i> -butyldimethylsilyl)oxy)ethyl)-3-(4-methoxyphenyl)-5-(4,4,5,5-tetramethyl-1,3,2-dioxaborolan-2-yl)hexa-1,5-dien-1-yl)malonate ( <b>12f</b> ).....   | 28 |
| Diethyl 2-((3 <i>S</i> ,4 <i>S</i> , <i>E</i> )-4-(2-(( <i>tert</i> -butyldimethylsilyl)oxy)ethyl)-3-(furan-3-yl)-5-(4,4,5,5-tetramethyl-1,3,2-dioxaborolan-2-yl)hexa-1,5-dien-1-yl)malonate ( <b>12g</b> ) .....       | 29 |
| Diethyl 2-((3 <i>S</i> ,4 <i>S</i> , <i>E</i> )-4-(2-(( <i>tert</i> -butyldimethylsilyl)oxy)ethyl)-5-(4,4,5,5-tetramethyl-1,3,2-dioxaborolan-2-yl)-3-(thiophen-3-yl)hexa-1,5-dien-1-yl)malonate ( <b>12h</b> ).....     | 30 |
| Diethyl 2-((3 <i>S</i> ,4 <i>S</i> , <i>E</i> )-4-(2-(( <i>tert</i> -butyldimethylsilyl)oxy)ethyl)-3-phenethyl-5-(4,4,5,5-tetramethyl-1,3,2-dioxaborolan-2-yl)hexa-1,5-dien-1-yl)malonate ( <b>12i</b> ) .....          | 30 |
| Diethyl 2-((1 <i>E</i> ,3 <i>S</i> ,4 <i>S</i> ,6 <i>E</i> )-3,7-diphenyl-4-(1-(4,4,5,5-tetramethyl-1,3,2-dioxaborolan-2-yl)vinyl)hepta-1,6-dien-1-yl)malonate ( <b>12j</b> ) .....                                     | 31 |
| Diethyl 2-((3 <i>S</i> ,4 <i>S</i> , <i>E</i> )-4-acetyl-8-( <i>tert</i> -butyldimethylsilyl)-3-phenyloct-1-en-7-yn-1-yl)malonate ( <b>12k</b> ) .....                                                                  | 32 |
| Diethyl 2-((3 <i>S</i> ,4 <i>S</i> , <i>E</i> )-7-(methoxy(methyl)amino)-7-oxo-3-phenyl-4-(1-(4,4,5,5-tetramethyl-1,3,2-dioxaborolan-2-yl)vinyl)hept-1-en-1-yl)malonate ( <b>12l</b> ) .....                            | 32 |
| ( <i>R</i> , <i>E</i> )-Diethyl 2-(3-phenyl-5-(4,4,5,5-tetramethyl-1,3,2-dioxaborolan-2-yl)hexa-1,5-dien-1-yl)malonate ( <b>12m</b> ) .....                                                                             | 33 |
| Determination of Stereochemical Identity .....                                                                                                                                                                          | 34 |
| ( <i>R</i> , <i>E</i> )-Diethyl 2-(5-oxo-3-phenylhex-1-en-1-yl)malonate ( <b>S13</b> ).....                                                                                                                             | 34 |
| (3 <i>S</i> ,4 <i>S</i> )-4-(2-(( <i>tert</i> -Butyldimethylsilyl)oxy)ethyl)-3-phenyl-5-(4,4,5,5-tetramethyl-1,3,2-dioxaborolan-2-yl)hex-5-en-1-ol ( <b>S14</b> ).....                                                  | 35 |
| (3 <i>S</i> ,4 <i>R</i> )-4-(2-(( <i>tert</i> -Butyldimethylsilyl)oxy)ethyl)-3-phenylhex-5-en-1-ol ( <b>S15</b> ).....                                                                                                  | 36 |
| (3 <i>S</i> ,4 <i>R</i> )-4-(2-(( <i>tert</i> -Butyldimethylsilyl)oxy)ethyl)-3-phenylhex-5-enal ( <b>S16</b> ) .....                                                                                                    | 36 |
| <i>tert</i> -Butyldimethyl(((3 <i>R</i> ,4 <i>S</i> )-4-phenyl-3-vinylhept-6-en-1-yl)oxy)silane ( <b>S17</b> ) .....                                                                                                    | 36 |
| <i>tert</i> -Butyldimethyl(2-((1 <i>R</i> ,5 <i>S</i> )-5-phenylcyclopent-2-en-1-yl)ethoxy)silane ( <b>S18</b> ).....                                                                                                   | 36 |
| Procedure for Isomerization of 1,6-Conjugate Addition Products.....                                                                                                                                                     | 37 |
| ( <i>S</i> )-Diethyl 2-(3-phenylhex-5-yn-1-ylidene)malonate ( <b>14</b> ).....                                                                                                                                          | 37 |
| Procedure for Conversion to Aldehydes .....                                                                                                                                                                             | 37 |
| ( <i>R</i> )-3-Phenylhex-5-ynal ( <b>15a</b> ) .....                                                                                                                                                                    | 37 |
| ( <i>R</i> )-3-(2-Methoxyphenyl)hex-5-ynal ( <b>15b</b> ).....                                                                                                                                                          | 37 |
| ( <i>R</i> )-3-( <i>tert</i> -Butyl)hex-5-ynal ( <b>15c</b> ).....                                                                                                                                                      | 38 |
| ( <i>R</i> )-3-methyl-3-phenylhex-5-ynal ( <b>16</b> ).....                                                                                                                                                             | 38 |
| Procedure for Methylation of 1,6-Conjugate Addition Product.....                                                                                                                                                        | 38 |
| ( <i>R</i> , <i>E</i> )-Diethyl 2-methyl-2-(3-phenylhex-1-en-5-yn-1-yl)malonate ( <b>17</b> ) .....                                                                                                                     | 38 |
| Procedure for Enantioselective Desymmetrization of Diesters.....                                                                                                                                                        | 39 |
| (2 <i>R</i> ,5 <i>R</i> , <i>E</i> )-Dthyl 2-(hydroxymethyl)-2-methyl-5-phenyloct-3-en-7-ynoate ( <b>18</b> ) .....                                                                                                     | 39 |
| Diethyl 2-((3 <i>S</i> ,4 <i>S</i> , <i>E</i> )-4-acetyl-6-(( <i>tert</i> -butyldimethylsilyl)oxy)-3-phenethylhex-1-en-1-yl)malonate ( <b>19</b> )...                                                                   | 39 |
| Formal Synthesis of (–)-Equisetin .....                                                                                                                                                                                 | 39 |
| ( <i>R</i> , <i>E</i> )-Diethyl 2-(3-methylhex-1-en-5-yn-1-yl)malonate ( <b>4n</b> ) .....                                                                                                                              | 39 |
| Diethyl 2-(( <i>R</i> ,1 <i>E</i> ,5 <i>E</i> )-3-methyl-6-(4,4,5,5-tetramethyl-1,3,2-dioxaborolan-2-yl)hexa-1,5-dien-1-yl)malonate ( <b>20</b> ) .....                                                                 | 40 |
| ( <i>R</i> , <i>E</i> )-Ethyl 2,6-dimethyl-8-oxooct-2-enoate ( <b>21</b> ).....                                                                                                                                         | 40 |
| ( <i>R</i> ,2 <i>E</i> ,8 <i>E</i> )-Ethyl 2,6-dimethyl-9-(4,4,5,5-tetramethyl-1,3,2-dioxaborolan-2-yl)nona-2,8-dienoate ( <b>22</b> ) .....                                                                            | 41 |

|                                                                                                             |            |
|-------------------------------------------------------------------------------------------------------------|------------|
| ( <i>R,2E,8E,10E</i> )-Ethyl 12-(methoxymethoxy)-2,6-dimethyldodeca-2,8,10-trienoate ( <b>24</b> ).....     | 41         |
| Data for Background and Control Experiments.....                                                            | 42         |
| <b>3. NMR Spectra.....</b>                                                                                  | <b>42</b>  |
| <b>4. Density Functional Theory (DFT) Calculations.....</b>                                                 | <b>170</b> |
| Nomenclature .....                                                                                          | 171        |
| Investigation of different chelate geometries (Fig. S1-1).....                                              | 171        |
| Stereochemical model with a NaOPh bridge (Fig. S2-1 and S3-1).....                                          | 172        |
| Stereochemical model involving deprotonation with NaO <i>t</i> -Bu and a Na bridge (Fig. S4-1 & S5-1) ..... | 172        |
| Influence of the base on the background reaction (Fig. S6-1) .....                                          | 173        |
| Analysis of the origin of diastereoselectivity for allyl addition with a model NHC ligand (Fig. S7-1) ..... | 173        |
| Difference in selectivity with NHC and phosphine ligands – Part I (Fig. S8-1, S9-1, S10-1 & S11-1).....     | 174        |
| Difference in selectivity with NHC and phosphine ligands – Part II (Fig. S12-1, S13-1 & S14-1) .....        | 174        |
| Conformer distribution for transition states (Figures S15-1 to S15-9) .....                                 | 205        |
| <b>5. Energies and Gibbs Free Energies .....</b>                                                            | <b>214</b> |
| Table S1. Optimization in Figures S1-1–S15-9 with $\omega$ B97XD/Def2SVP <sub>thf(PCM)</sub> .....          | 214        |
| Table S2. Single point energies in Figures S1-1–S15-9 with $\omega$ B97XD, M06 and MN12SX .....             | 227        |
| Table S3. Single point energies in Figures S1-1–S15-9 with MN12L and M06L.....                              | 240        |
| Table S4. Single point energies in Figures S1-1–S15-9 with BP86-D3BJ and PBE0-D3BJ .....                    | 253        |
| <b>6. Geometries of computed structures with <math>\omega</math>B97XD/Def2SVP<sub>thf(PCM)</sub> .....</b>  | <b>266</b> |

## 1. Extended Bibliography

### **Additional citation regarding competition between 1,6- and 1,4-conjugate addition:**

Hénon, H., Mauduit, M. & Alexakis, A. Regiodivergent 1,4 versus 1,6 asymmetric copper-catalyzed conjugate addition. *Angew. Chem. Int. Edn* **47**, 9122–9124 (2008).

### **Additional citations on auxiliary-controlled catalytic enantioselective 1,6-conjugate addition:**

Okada, S., Arayama, K., Murayama, R., Ishizuka, T., Hara, K., Hirone, N., Hata, T. & Urabe, H. Iron-catalyst-switched selective conjugate addition of Grignard reagents:  $\alpha,\beta,\gamma,\delta$ -Unsaturated amides as versatile templates for asymmetric three-component coupling process. *Angew. Chem. Int. Edn.* **47**, 6860–6864 (2008).

### **Additional citations on catalytic enantioselective Claisen rearrangement processes:**

(a) Maruoka, K., Banno, H. & Yamamoto, H. Asymmetric Claisen rearrangement catalyzed by chiral organoaluminum reagent. *J. Am. Chem. Soc.* **112**, 7791–7793 (1990).

(b) Abraham, L., Czerwonka, R. & Hiersemann, M. The catalytic enantioselective Claisen rearrangement of an allyl vinyl ether. *Angew. Chem. Int. Edn* **40**, 4700–4703 (2001).

(c) Akiyama, K. & Mikami, K. Enantioselective catalysis of Claisen rearrangement by DABNTf–Pd(II) complex. *Tetrahedron Lett.* **45**, 7217–7220 (2004).

(d) Geherty, M. E., Dura, R. D. & Nelson, S. G. Catalytic asymmetric Claisen rearrangement of unactivated allyl vinyl ethers. *J. Am. Chem. Soc.* **132**, 11875–11877 (2010).

(e) Uyeda, C. & Jacobsen, E. N. Enantioselective Claisen rearrangements with a hydrogen-bond donor catalyst. *J. Am. Chem. Soc.* **130**, 9228–9229 (2008).

(f) Uyeda, C., Rötheli, A. R. & Jacobsen, E. N. Catalytic enantioselective Claisen rearrangement of *O*-allyl  $\beta$ -ketoesters. *Angew. Chem. Int. Edn* **49**, 9753–9756 (2010).

(g) Uyeda, C. & Jacobsen, E. N. Transition-state charge stabilization through multiple non-covalent interactions in the guanidinium-catalyzed enantioselective Claisen rearrangement. *J. Am. Chem. Soc.* **133**, 5062–5075 (2011).

(h) Tan, J., Cheon, C.-H. & Yamamoto, H. Catalytic asymmetric Claisen rearrangement of enolphosphonates: Construction of vicinal tertiary and all-carbon quaternary centers. *Angew. Chem. Int. Edn* **51**, 8264–8267 (2012).

### **Additional citations on applications of catalytic enantioselective Claisen rearrangement in natural product synthesis:**

- (a) Pollex, A. & Hiersemann, M. Catalytic asymmetric Claisen rearrangement in natural product synthesis: Synthetic studies toward (-)-Xeniolide F. *Org. Lett.* **7**, 5705–5708 (2005).
- (b) Becker, J., Butt, L., Kiedrowski, V., Mischler, E., Quentin, F. & Hiersemann, M. Catalytic asymmetric Claisen rearrangement of Gosteli-type allyl vinyl ether: Total synthesis of (-)-9,10-Dihydroecklonialactone B. *J. Org. Chem.* **79**, 3040–3051 (2014).

## 2. Experimental

### General

Infrared (IR) spectra were recorded on a Bruker FT-IR Alpha (ATR mode) spectrophotometer,  $\nu_{\max}$  in  $\text{cm}^{-1}$ . Bands are characterized as broad (br), strong (s), medium (m), and weak (w).  $^1\text{H}$  NMR spectra were recorded on a Varian Unity INOVA 400 (400 MHz) spectrometer. Chemical shifts are reported in ppm from tetramethylsilane with the solvent resonance as the internal standard ( $\text{CDCl}_3$ ;  $\delta$  7.26 ppm). Data are reported as follows: chemical shift, integration, multiplicity (s = singlet, d = doublet, t = triplet, q = quartet, br s = broad singlet, m = multiplet, app. = apparent), and coupling constant (Hz).  $^{13}\text{C}$  NMR spectra were recorded on a Varian Unity INOVA 400 (100 MHz) spectrometer with complete proton decoupling. Chemical shifts are reported in ppm from tetramethylsilane with the solvent resonance as the internal standard ( $\text{CDCl}_3$ ;  $\delta$  77.16 ppm). High-resolution mass spectrometry was performed on a JEOL AccuTOF DART (positive mode) at the Mass Spectrometry Facility, Boston College. Enantiomer ratios were determined by high-performance liquid chromatography (HPLC) with a Shimadzu chromatograph (Chiral Technologies Chiralcel OD-H (4.6 x 250 mm), Chiralcel OJ-H (4.6 x 250 mm), Chiralcel OZ-H (4.6 x 250 mm), Chiralcel OZ-3 (4.6 x 150 mm), Chiralpak AD-H (4.6 x 250 mm)) in comparison with authentic racemic materials. Specific rotations were measured on a Rudolph Research Analytical Autopol IV Polarimeter.

Unless otherwise noted, all reactions were carried out with distilled and degassed solvents under an atmosphere of dry  $\text{N}_2$  in oven- (135 °C) or flame-dried glassware with standard dry box or vacuum-line techniques. Solvents were purified under a positive pressure of dry argon by a modified Innovative Technologies purification system: toluene, benzene and hexanes were purified through a copper oxide and alumina column;  $\text{CH}_2\text{Cl}_2$  and  $\text{Et}_2\text{O}$  were purged with Ar and purified by passage through two alumina columns. Tetrahydrofuran (THF; Aldrich Chemical Co.) was purified by distillation from sodium benzophenone ketyl immediately prior to use unless otherwise specified. Methanol (Aldrich Chemical Co.) was distilled over  $\text{CaH}_2$ . All work-up and purification procedures were carried out with reagent grade solvents (purchased from Fisher Scientific) in air.

### Reagents and Ligands

**Allenes (11):** prepared according to previously reported procedures.<sup>1</sup>

**Allenylboronic acid pinacol ester:** purchased from Aldrich Chemical Co. and used as received.

**Alkenyl-substituted dienates:** prepared according to previously reported procedures.<sup>2</sup>

---

(1) (a) Crabbé, P., Fillion, H., André, D. & Luche, J.-L. *J. Chem. Soc., Chem. Commun.* 859–860 (1979). (b) Searles, S., Li, Y., Nassim, B., Lopes, M.-T. R., Tran, P. T. & Crabbé, P. *J. Chem. Soc., Perkin Trans. 1* 747–751 (1984). (c) Inoue, A., Kondo, J., Shinokubo, H. & Oshima, K. *Chem. Eur. J.* **8**, 1730–1740 (2002). (d) Baird, M. S., Nizovtsev, A. V. & Bolesov, I. G. *Tetrahedron* **58**, 1581–1593 (2002).

**Aryl-substituted dienoates:** prepared according to previously reported procedures.<sup>3</sup>

**Barium hydroxide octahydrate:** purchased from Aldrich Chemical Co. and used as received.

**[1,1'-Bis(diphenylphosphino)ferrocene]dichloropalladium (II), complex with dichloromethane:** purchased from Strem Chemicals Inc. and used as received.

**Bis(pinacolato)diboron:** purchased from Frontier Scientific, Inc. and recrystallized from pentane.

**(Carbethoxyethylidene)triphenylphosphorane:** purchased from Aldrich Chemical Co. and used as received.

**Chromium(II) chloride:** purchased from Alfa Aesar Co. and used as received.

**Copper(I) chloride:** purchased from Strem Chemicals Inc. and used as received.

**1,4-Diazabicyclo[2.2.2]octane (DABCO):** purchased from Aldrich Chemical Co. and used as received.

**1,8-Diazabicyclo[5.4.0]undec-7-ene (DBU):** purchased from Aldrich Chemical Co. and used as received.

**2-Dichloromethyl-4,4,5,5-tetramethyl-[1,3,2]dioxaborolane:** prepared according to previously reported procedures<sup>4</sup>.

**Diethyl bromomalonate:** purchased from Alfa Aesar Co. and used as received.

**Dimethyl sulfoxide:** purchased from Aldrich Chemical Co. and used as received.

**Iodomethane:** purchased from Aldrich Chemical Co. and used as received.

**Imidazolium salt 3a and Imidazolium salt 3b:** purchased from Aldrich Chemical Co. and used as received.

**Imidazolium salts 9a-g:** prepared according to previously reported procedures<sup>5</sup>.

**Lithium iodide:** purchased from Aldrich Chemical Co. and used as received.

**Methyl chloroformate:** purchased from Aldrich Chemical Co. and used as received.

**N,N-Diisopropylamine:** purchased from Aldrich Chemical Co. and used as received.

**N,N-Dimethylformamide:** purchased from Aldrich Chemical Co. and used as received.

**Phosphines (8a-e):** purchased from Strem Chemicals Inc. and used as received.

**Porcine liver esterase:** purchased from Aldrich Chemical Co. and used as received.

**Potassium carbonate:** purchased from Aldrich Chemical Co. and used as received.

---

(2) Singh, R. & Ghosh, S. K. *Tetrahedron* **66**, 2284–2292 (2010).

(3) Liu, L., Sarkisian, R., Xu, Z. & Wang, H. *J. Org. Chem.* **77**, 7693–7699 (2012).

(4) Raheem, I. T., Goodman, S. N. & Jacobsen, E. N. *J. Am. Chem. Soc.* **126**, 706–707 (2004).

(5) Meng, F., McGrath, K. P. & Hoveyda, A. H. *Nature* **513**, 367–374 (2014).



**Sodium borohydride:** purchased from Alfa Aesar Co. and used as received.

**Sodium *tert*-butoxide:** purchased from Strem Chemicals Inc. and used as received.

**Sodium hydride:** purchased from Strem Chemicals Inc. and used as received.

**Sodium perborate tetrahydrate:** purchased from Aldrich Chemical Co. and used as received.

**Sodium phenoxide:** purchased from Alfa Aesar Co. and used as received.

**Triethylamine:** purchased from Aldrich Chemical Co. and used as received.

### Imidazolinium salts **9e** and **9g**:

**9e:** IR (neat): 2954 (m), 2929 (m), 2858 (m), 1635 (s), 1471 (m), 1382 (w), 1252 (m), 1140 (m), 1032 (w), 835 (s), 782 (m), 703 (m), 558 (m)  $\text{cm}^{-1}$ ;  $^1\text{H}$  NMR ( $\text{CDCl}_3$ , 400 MHz):  $\delta$  8.01 (1H, s), 7.43–7.35 (5H, m), 6.95 (2H, s), 4.97–4.94 (1H, m), 4.27–4.07 (6H, m), 2.30 (3H, s), 2.29 (6H, s), 0.83 (9H, s), –0.02 (3H, s), –0.07 (3H, s);  $^{13}\text{C}$  NMR ( $\text{CDCl}_3$ , 100 MHz):  $\delta$  157.8, 140.7, 133.7, 130.6, 130.2, 129.7, 129.6, 127.9, 64.0, 63.3, 50.8, 48.3, 25.9, 21.2, 18.3, 17.6, –5.6, –5.7; HRMS (ESI+): Calcd for  $\text{C}_{26}\text{H}_{39}\text{N}_2\text{O}_1\text{Si}_1$   $[\text{M}-\text{PF}_6]^+$ : 423.28316 m/z, Found: 423.28234 m/z. Specific rotation:  $[\alpha]_{\text{D}}^{20}$  –24.7 (*c* 1.08, acetone).

**9g:** IR (neat): 2953 (m), 2928 (m), 2857 (m), 1631 (s), 1598 (s), 1471 (m), 1378 (m), 1331 (m), 1289 (m), 1201 (m), 1106 (m), 1006 (w), 827 (s), 779 (s), 684 (m), 557 (s)  $\text{cm}^{-1}$ ;  $^1\text{H}$  NMR ( $\text{CDCl}_3$ , 400 MHz):  $\delta$  8.66 (1H, s), 7.42–7.35 (5H, m), 6.93–6.86 (3H, m), 4.96–4.94 (1H, m), 4.37–4.32 (2H, m), 4.23–4.20 (1H, m), 4.16–4.11 (1H, m), 4.03–3.98 (2H, m), 2.31 (6H, s), 0.86 (9H, s), 0.06 (3H, s), 0.04 (3H, s);  $^{13}\text{C}$  NMR ( $\text{CDCl}_3$ , 100 MHz):  $\delta$  171.7, 153.6, 140.5, 135.0, 133.0, 129.6, 129.5, 128.0, 116.1, 64.5, 63.1, 48.5, 47.8, 25.8, 21.3, 18.2, –5.6, –5.7; HRMS (ESI+): Calcd for  $\text{C}_{25}\text{H}_{37}\text{N}_2\text{O}_1\text{Si}_1$   $[\text{M}-\text{PF}_6]^+$ : 409.26751 m/z, Found: 409.26824 m/z. Specific rotation:  $[\alpha]_{\text{D}}^{20}$  –25.2 (*c* 1.26, acetone).

### NHC–Cu-Catalyzed Enantioselective Propargyl 1,6-Conjugate; Tertiary Centers

In an  $\text{N}_2$ -filled glove box, imidazolinium salt **9b** (2.3 mg, 0.0050 mmol), CuCl (0.5 mg, 0.0050 mmol), NaOt-Bu (0.9 mg, 0.010 mmol) and NaOPh (17.4 mg, 0.15 mmol) and thf (0.5 mL) are added into an oven-dried vial equipped with a stirring bar. The mixture is allowed to premix for 2 h at 22 °C. The resulting mixture is then added into a separate oven-dried vial containing allenylboronic acid pinacol ester (36.0  $\mu\text{L}$ , 0.20 mmol). The vial is sealed with a Teflon screw cap and removed from the glove box. The mixture is allowed to stir at 22 °C for 30 min. Dienoate **1a** (27.4 mg, 0.10 mmol) is subsequently added into the solution by a syringe, and the resulting mixture is allowed to stir at 22 °C for 16 h. The mixture is filtered through a short plug of Celite and silica gel eluting with diethyl ether. The filtrate is washed with 1M solution of aqueous NaOH, dried over  $\text{MgSO}_4$  and concentrated *in vacuo*. The resulting yellow oily residue is purified by silica gel chromatography (hexanes:ethyl acetate = 20:1) to obtain **4a** (23.3 mg, 0.074 mmol, 74% yield) as colorless oil.

**(*R,E*)-Diethyl 2-(3-phenylhex-1-en-5-yn-1-yl)malonate (4a):**

IR (neat): 3288 (m), 2982 (m), 2935 (m), 1729 (s), 1601 (w), 1494 (m), 1452 (m), 1368 (m), 1266 (s), 1173 (s), 1030 (s), 970 (m), 863 (m), 700 (s), 637 (m)  $\text{cm}^{-1}$ ;  $^1\text{H}$  NMR ( $\text{CDCl}_3$ , 400 MHz):  $\delta$  7.33–7.30 (2H, m), 7.24–7.22 (3H, m), 5.94 (1H, dd,  $J = 15.0, 6.6$  Hz), 5.82 (1H, dd,  $J = 15.0, 9.0$  Hz), 4.23–4.18 (4H, m), 4.03 (1H,  $J = 9.0$  Hz), 3.59 (1H, td,  $J = 7.2, 7.2$  Hz), 2.65–2.57 (2H, m), 1.96 (1H, t,  $J = 3.0$  Hz), 1.27 (3H, t,  $J = 7.2$  Hz), 1.24 (3H, t,  $J = 7.2$  Hz);  $^{13}\text{C}$  NMR ( $\text{CDCl}_3$ , 100 MHz):  $\delta$  168.2, 168.1, 142.1, 137.6, 128.6, 127.8, 127.0, 122.9, 82.1, 70.3, 61.8, 61.7, 55.7, 47.1, 25.4, 14.2, 14.1; HRMS (ESI+): Calcd for  $\text{C}_{19}\text{H}_{23}\text{O}_4$   $[\text{M}+\text{H}]^+$ : 315.15963  $m/z$ , Found: 315.16119  $m/z$ . Specific rotation:  $[\alpha]_{\text{D}}^{20} -4.7$  ( $c$  0.69,  $\text{CHCl}_3$ ).

Enantiomeric purity of **4a** was determined by HPLC analysis in comparison with authentic racemic material (97.5:2.5 e.r. shown; Chiralcel OD–H column, 99.5:0.5 hexanes/*i*-PrOH, 0.8 mL/min, 220 nm).

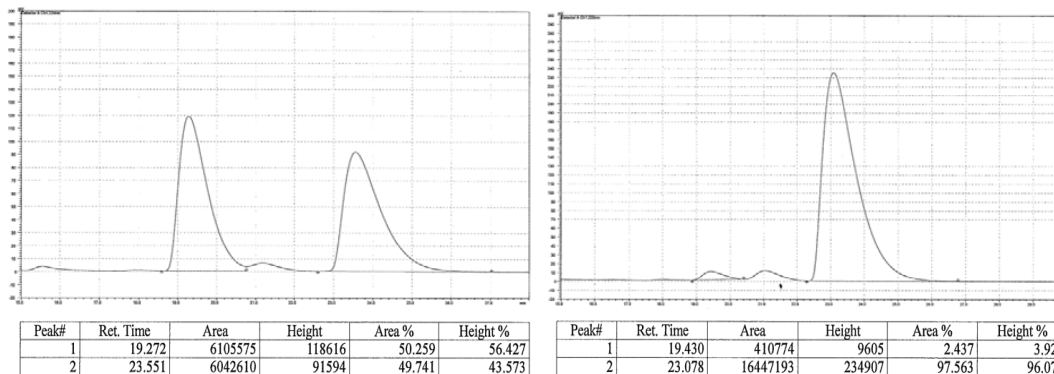

| Peak # | Time (min) | Area (%) | Peak # | Time (min) | Area (%) |
|--------|------------|----------|--------|------------|----------|
| 1      | 19.272     | 50.259   | 1      | 19.430     | 2.437    |
| 2      | 23.551     | 49.741   | 2      | 23.078     | 97.563   |

**Determination of Stereochemical Identity:**

The corresponding (*R*)-3-phenylhexan-1-ol was obtained after one-pot isomerization and retro-aldol and hydrogenation of the corresponding aldehyde **16a**. Specific rotation for (*R*)-3-phenylhexan-1-ol:  $[\alpha]_{\text{D}}^{20} -6.0$  ( $c$  1.69,  $\text{CHCl}_3$ ). Literature value:  $[\alpha]_{\text{D}}^{20} -6.7$  ( $c$  2.00,  $\text{CHCl}_3$ )<sup>6</sup>.

**(*R,E*)-Diethyl 2-(3-(2-methoxyphenyl)hex-1-en-5-yn-1-yl)malonate (4b):**

IR (neat): 3292 (w), 2982 (w), 2938 (w), 1729 (s), 1599 (w), 1492 (m), 1439 (m), 1240 (s), 1148 (s), 1027 (s), 970 (m), 861 (w), 754 (s), 637 (m)  $\text{cm}^{-1}$ ;  $^1\text{H}$  NMR ( $\text{CDCl}_3$ , 400 MHz):  $\delta$  7.21 (1H, td,  $J = 7.8, 1.8$  Hz), 7.16 (1H, dd,  $J = 7.8, 1.8$  Hz), 6.91 (1H, td,  $J = 7.8, 1.2$  Hz), 6.86 (1H, dd,  $J = 7.8, 1.2$  Hz), 5.99 (1H, dd,  $J = 15.6, 6.8$  Hz), 5.83 (1H, dd,  $J = 15.6, 9.0$  Hz), 4.20 (2H, q,  $J = 7.2$  Hz), 4.17 (2H, q,  $J = 7.2$  Hz), 4.03 (1H, d,  $J = 9.0$  Hz), 4.00 (1H, td,  $J = 6.6, 6.6$  Hz), 3.82 (3H, s), 2.62–2.60 (2H, m), 1.92 (1H, t,  $J = 3.0$  Hz), 1.27 (3H, t,  $J = 7.2$  Hz), 1.24 (3H, t,  $J = 7.2$  Hz);  $^{13}\text{C}$  NMR ( $\text{CDCl}_3$ , 100 MHz):  $\delta$  168.3, 168.2, 157.0, 137.0, 130.5, 128.4, 128.0, 122.7, 120.6, 110.8, 82.7, 69.8, 61.7, 61.6, 55.8, 55.5,

(6) Reyes, E., Vicario, J. L., Carrillo, L., Badía, D., Uria, U. & Iza, A. *J. Org. Chem.* **71**, 7763–7772 (2006).

40.9, 23.9, 14.2, 14.1; HRMS (ESI+): Calcd for C<sub>20</sub>H<sub>25</sub>O<sub>5</sub> [M+H]<sup>+</sup>: 345.17020 m/z, Found: 345.17007 m/z. Specific rotation:  $[\alpha]_D^{20} -3.9$  (c 1.69, CHCl<sub>3</sub>).

Enantiomeric purity of **4b** was determined by HPLC analysis in comparison with authentic racemic material (97:3 e.r. shown; Chiralcel OZ–H column, 99:1 hexanes/*i*-PrOH, 0.8 mL/min, 220 nm).

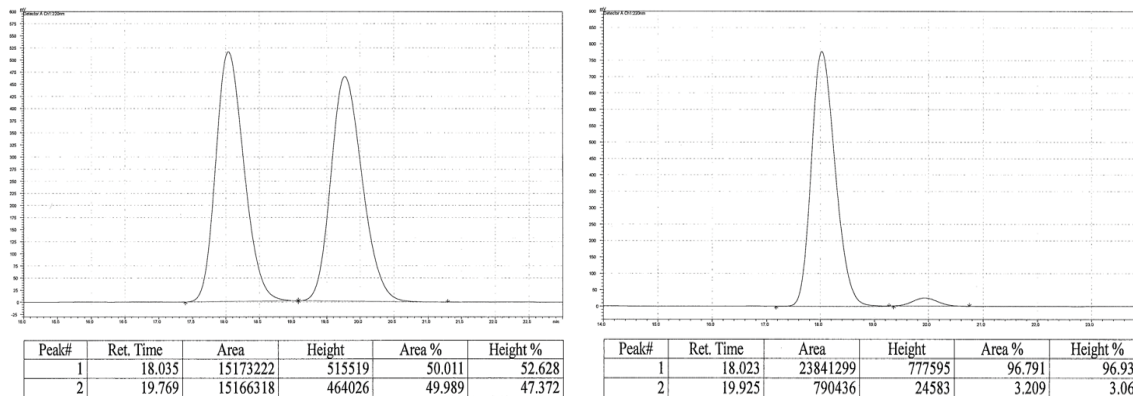

| Peak # | Time (min) | Area (%) | Peak # | Time (min) | Area (%) |
|--------|------------|----------|--------|------------|----------|
| 1      | 18.035     | 50.011   | 1      | 18.023     | 96.791   |
| 2      | 19.769     | 49.989   | 2      | 19.925     | 3.209    |

#### (*R,E*)-Diethyl 2-(3-(*o*-tolyl)hex-1-en-5-yn-1-yl)malonate (**4c**):

IR (neat): 3288 (m), 2982 (m), 2937 (m), 1729 (s), 1463 (m), 1368 (m), 1265 (s), 1148 (s), 1096 (m), 1029 (s), 970 (m), 863 (m), 757 (m), 638 (m) cm<sup>-1</sup>; <sup>1</sup>H NMR (CDCl<sub>3</sub>, 400 MHz): δ 7.19–7.11 (4H, m), 5.86 (1H, dd, *J* = 15.6, 6.8 Hz), 5.75 (1H, dd, *J* = 15.6, 8.8 Hz), 4.20 (2H, q, *J* = 6.8 Hz), 4.17 (2H, q, *J* = 6.8 Hz), 4.01 (1H, d, *J* = 8.8 Hz), 3.85 (1H, td, *J* = 6.8, 7.2 Hz), 2.63–2.59 (2H, m), 2.35 (3H, s), 1.95 (1H, t, *J* = 2.8 Hz), 1.27 (3H, t, *J* = 6.8 Hz), 1.23 (3H, t, *J* = 6.8 Hz); <sup>13</sup>C NMR (CDCl<sub>3</sub>, 100 MHz): δ 168.2, 168.1, 140.1, 137.4, 136.2, 130.7, 126.8, 126.5, 126.4, 122.8, 82.3, 70.0, 61.8, 61.7, 55.7, 42.8, 24.5, 19.7, 14.2, 14.1; HRMS (ESI+): Calcd for C<sub>20</sub>H<sub>25</sub>O<sub>4</sub> [M+H]<sup>+</sup>: 329.17528 m/z, Found: 329.17450 m/z. Specific rotation:  $[\alpha]_D^{20} -11.0$  (c 1.36, CHCl<sub>3</sub>).

Enantiomeric purity of **4c** was determined by HPLC analysis in comparison with authentic racemic material (95:5 e.r. shown; Chiralcel OZ–H column, 99.5:0.5 hexanes/*i*-PrOH, 0.8 mL/min, 220 nm).

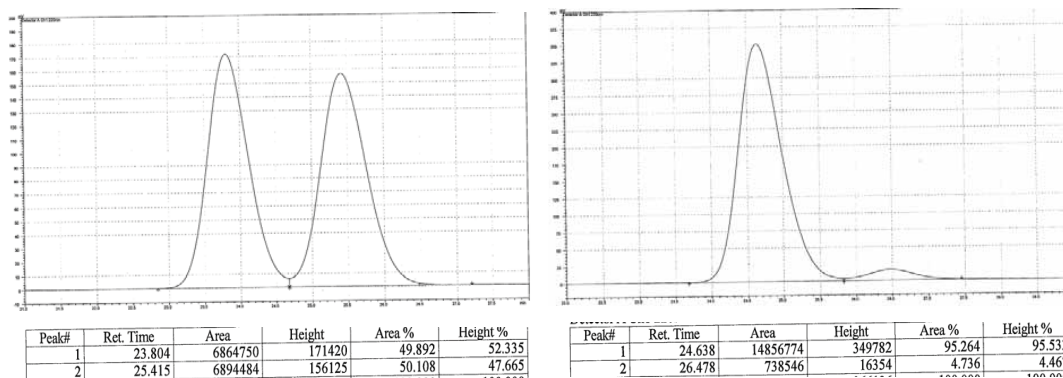

| Peak # | Time (min) | Area (%) | Peak # | Time (min) | Area (%) |
|--------|------------|----------|--------|------------|----------|
| 1      | 23.804     | 49.892   | 1      | 24.638     | 95.264   |
| 2      | 25.415     | 50.108   | 2      | 26.478     | 4.736    |

**(*R,E*)-Diethyl 2-(3-(naphthalen-1-yl)hex-1-en-5-yn-1-yl)malonate (4d):**

IR (neat): 3293 (w), 2982 (w), 2935 (w), 1728 (s), 1368 (m), 1258 (m), 1173 (m), 1095 (m), 1030 (m), 971 (m), 861 (w), 779 (s), 639 (m)  $\text{cm}^{-1}$ ;  $^1\text{H}$  NMR ( $\text{CDCl}_3$ , 400 MHz):  $\delta$  8.08 (1H, d,  $J = 8.4$  Hz), 7.87 (1H, d,  $J = 8.8$  Hz), 7.76 (1H, d,  $J = 8.0$  Hz), 7.54–7.39 (4H, m), 6.07 (1H, dd,  $J = 15.6, 6.8$  Hz), 5.90 (1H, dd,  $J = 15.6, 8.8$  Hz), 4.46 (1H, td,  $J = 6.8, 6.4$  Hz), 4.20 (2H, q,  $J = 7.2$  Hz), 4.16 (2H, q,  $J = 7.2$  Hz), 4.06 (1H, d,  $J = 8.8$  Hz), 2.80–2.77 (2H, m), 1.98 (1H, t,  $J = 2.8$  Hz), 1.26 (3H, t,  $J = 7.2$  Hz), 1.21 (3H, t,  $J = 7.2$  Hz);  $^{13}\text{C}$  NMR ( $\text{CDCl}_3$ , 100 MHz):  $\delta$  168.2, 168.1, 138.0, 137.4, 134.1, 131.4, 129.1, 127.7, 126.2, 125.7, 125.5, 124.5, 123.4, 123.3, 82.3, 70.5, 61.8, 61.7, 55.8, 42.2, 24.8, 14.2, 14.1; HRMS (ESI+): Calcd for  $\text{C}_{23}\text{H}_{25}\text{O}_4$   $[\text{M}+\text{H}]^+$ : 365.17528 m/z, Found: 365.17471 m/z. Specific rotation:  $[\alpha]_{\text{D}}^{20} +23.8$  ( $c$  1.81,  $\text{CHCl}_3$ ).

Enantiomeric purity of **4d** was determined by HPLC analysis in comparison with authentic racemic material (94:6 e.r. shown; Chiralcel OZ–H column, 99.5:0.5 hexanes/*i*-PrOH, 0.8 mL/min, 220 nm).

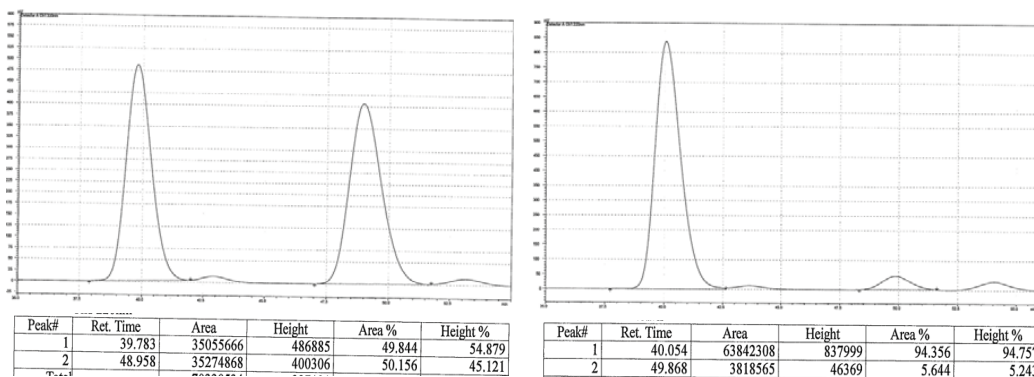

| Peak # | Time (min) | Area (%) | Peak # | Time (min) | Area (%) |
|--------|------------|----------|--------|------------|----------|
| 1      | 39.783     | 49.844   | 1      | 40.054     | 94.356   |
| 2      | 48.958     | 50.156   | 2      | 49.868     | 5.644    |

**(*R,E*)-Diethyl 2-(3-(4-methoxyphenyl)hex-1-en-5-yn-1-yl)malonate (4e):**

IR (neat): 3286 (m), 2982 (m), 2935 (m), 1728 (s), 1610 (m), 1512 (s), 1464 (m), 1246 (s), 1176 (s), 1096 (m), 1030 (s), 971 (m), 830 (m), 640 (m), 545 (m)  $\text{cm}^{-1}$ ;  $^1\text{H}$  NMR ( $\text{CDCl}_3$ , 400 MHz):  $\delta$  7.14 (2H, d,  $J = 8.4$  Hz), 6.85 (2H, d,  $J = 8.4$  Hz), 5.91 (1H, dd,  $J = 15.6, 7.2$  Hz), 5.78 (1H, dd,  $J = 15.6, 8.4$  Hz), 4.20 (2H, q,  $J = 7.2$  Hz), 4.18 (2H, q,  $J = 7.2$  Hz), 4.02 (1H, d,  $J = 8.4$  Hz), 3.79 (3H, s), 3.55 (1H, td,  $J = 7.2, 6.8$  Hz), 2.60–2.56 (2H, m), 1.95 (1H, t,  $J = 2.8$  Hz), 1.27 (3H, t,  $J = 7.2$  Hz), 1.25 (3H, t,  $J = 7.2$  Hz);  $^{13}\text{C}$  NMR ( $\text{CDCl}_3$ , 100 MHz):  $\delta$  168.3, 168.2, 158.6, 138.0, 134.1, 128.7, 122.6, 114.0, 82.3, 70.3, 61.8, 61.7, 55.7, 55.4, 46.2, 25.5, 14.2, 14.1; HRMS (ESI+): Calcd for  $\text{C}_{20}\text{H}_{25}\text{O}_5$   $[\text{M}+\text{H}]^+$ : 345.17020 m/z, Found: 345.17107 m/z. Specific rotation:  $[\alpha]_{\text{D}}^{20} -10.0$  ( $c$  1.24,  $\text{CHCl}_3$ ).

Enantiomeric purity of **4e** was determined by HPLC analysis in comparison with authentic racemic material (97:3 e.r. shown; Chiralcel OZ–H column, 98.5:1.5 hexanes/*i*-PrOH, 0.8 mL/min, 220 nm).

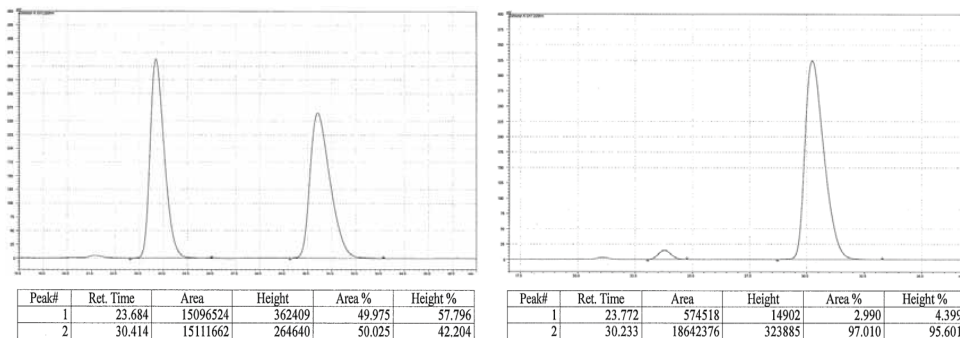

| Peak # | Time (min) | Area (%) | Peak # | Time (min) | Area (%) |
|--------|------------|----------|--------|------------|----------|
| 1      | 23.684     | 49.975   | 1      | 23.772     | 2.990    |
| 2      | 30.414     | 50.025   | 2      | 30.233     | 97.010   |

**(*R,E*)-Diethyl 2-(3-(4-bromophenyl)hex-1-en-5-yn-1-yl)malonate (4f):**

IR (neat): 3297 (w), 2982 (w), 2935 (w), 1728 (s), 1488 (m), 1368 (m), 1264 (m), 1150 (m), 1030 (m), 971 (m), 822 (m), 642 (m)  $\text{cm}^{-1}$ ;  $^1\text{H}$  NMR ( $\text{CDCl}_3$ , 400 MHz):  $\delta$  7.43 (2H, d,  $J = 8.4$  Hz), 7.11 (2H, d,  $J = 8.4$  Hz), 5.89 (1H, dd,  $J = 15.0, 7.2$  Hz), 5.79 (1H, dd,  $J = 15.0, 9.0$  Hz), 4.21 (2H, q,  $J = 7.2$  Hz), 4.18 (2H, q,  $J = 7.2$  Hz), 4.02 (1H, d,  $J = 9.0$  Hz), 3.55 (1H, td,  $J = 6.6, 7.2$  Hz), 2.61 (1H, ddd,  $J = 16.8, 7.2, 2.4$  Hz), 1.95 (1H, t,  $J = 2.4$  Hz), 1.27 (3H, t,  $J = 7.2$  Hz), 1.24 (3H, t,  $J = 7.2$  Hz);  $^{13}\text{C}$  NMR ( $\text{CDCl}_3$ , 100 MHz):  $\delta$  168.1, 168.0, 141.0, 137.1, 131.7, 129.6, 123.4, 120.9, 81.6, 70.7, 61.9, 61.8, 55.6, 46.5, 25.2, 14.2, 14.1; HRMS (ESI+): Calcd for  $\text{C}_{19}\text{H}_{22}\text{Br}_1\text{O}_4$   $[\text{M}+\text{H}]^+$ : 393.07015  $m/z$ , Found: 393.06864  $m/z$ . Specific rotation:  $[\alpha]_D^{20} -11.9$  ( $c$  1.80,  $\text{CHCl}_3$ ).

Enantiomeric purity of **4f** was determined by HPLC analysis in comparison with authentic racemic material (96:4 e.r. shown; Chiralcel OZ-H column, 99.5:0.5 hexanes/*i*-PrOH, 0.8 mL/min, 220 nm).

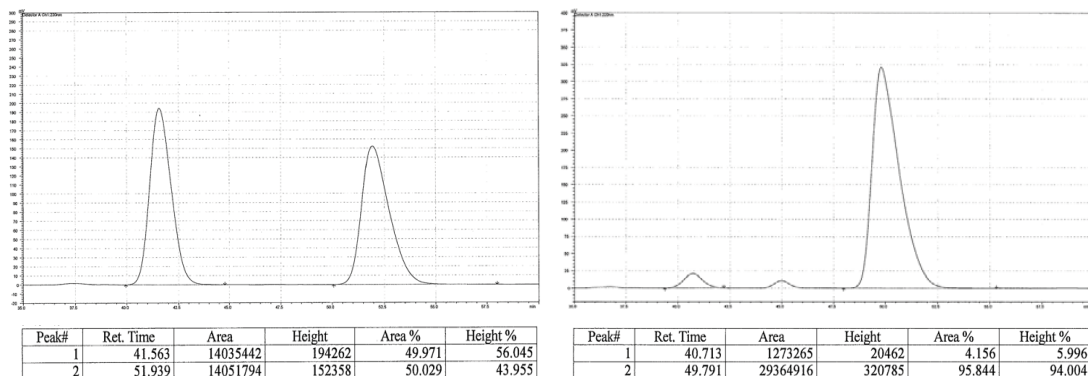

| Peak # | Time (min) | Area (%) | Peak # | Time (min) | Area (%) |
|--------|------------|----------|--------|------------|----------|
| 1      | 41.563     | 49.971   | 1      | 40.713     | 4.156    |
| 2      | 51.939     | 50.029   | 2      | 49.791     | 95.844   |

**(*R,E*)-Diethyl 2-(3-(4-(trifluoromethyl)phenyl)hex-1-en-5-yn-1-yl)malonate (4g):**

IR (neat): 3299 (w), 2984 (w), 2940 (w), 1730 (s), 1619 (w), 1447 (w), 1324 (s), 1269 (m), 1161 (s), 1113 (s), 1067 (s), 1018 (s), 971 (m), 837 (m), 638 (m), 606 (m)  $\text{cm}^{-1}$ ;  $^1\text{H}$  NMR ( $\text{CDCl}_3$ , 400 MHz):  $\delta$  7.57 (2H, d,  $J = 8.0$  Hz), 7.35 (2H, d,  $J = 8.0$  Hz), 5.92 (1H, dd,  $J = 15.6, 6.8$  Hz), 5.82 (1H, dd,  $J = 15.6, 8.4$  Hz), 4.24–4.16 (4H, m), 4.03 (1H, d,  $J = 8.4$  Hz), 2.66 (1H, ddd,  $J = 16.8, 7.2, 2.8$  Hz), 1.96

(1H, t,  $J = 2.8$  Hz), 1.27 (3H, t,  $J = 6.8$  Hz), 1.24 (3H, t,  $J = 6.8$  Hz);  $^{13}\text{C}$  NMR ( $\text{CDCl}_3$ , 100 MHz):  $\delta$  168.1, 168.0, 146.0, 136.7, 129.3 (q,  $J = 32.6$  Hz), 127.9, 125.6 (q,  $J = 3.8$  Hz), 124.3 (q,  $J = 270.2$  Hz), 123.8, 81.4, 70.9, 61.9, 61.8, 55.6, 46.8, 25.2, 14.2, 14.1; HRMS (ESI+): Calcd for  $\text{C}_{20}\text{H}_{22}\text{F}_3\text{O}_4$   $[\text{M}+\text{H}]^+$ : 383.14702 m/z, Found: 383.14610 m/z. Specific rotation:  $[\alpha]_{\text{D}}^{20} -9.5$  ( $c$  2.16,  $\text{CHCl}_3$ ).

Enantiomeric purity of **4g** was determined by HPLC analysis in comparison with authentic racemic material (96:4 e.r. shown; Chiralcel OZ-H column, 99.5:0.5 hexanes/*i*-PrOH, 0.8 mL/min, 220 nm).

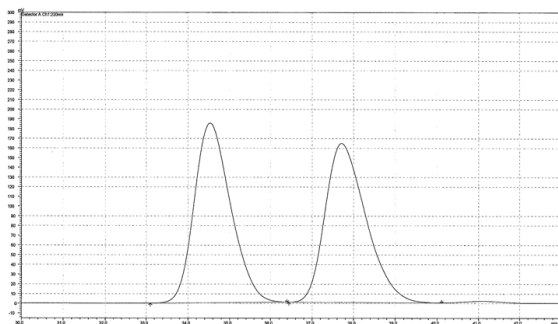

| Peak# | Ret. Time | Area     | Height | Area % | Height % |
|-------|-----------|----------|--------|--------|----------|
| 1     | 34.527    | 11307932 | 185229 | 50.175 | 53.039   |
| 2     | 37.702    | 11228926 | 164005 | 49.825 | 46.961   |

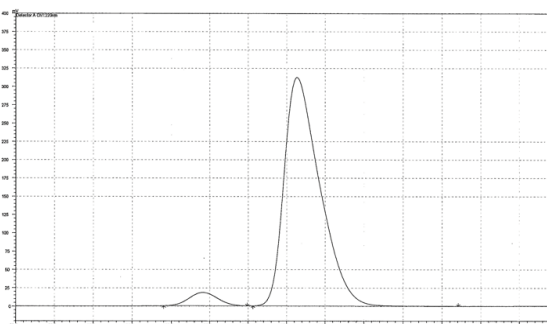

| Peak# | Ret. Time | Area     | Height | Area % | Height % |
|-------|-----------|----------|--------|--------|----------|
| 1     | 32.815    | 874585   | 17574  | 4.170  | 5.334    |
| 2     | 35.266    | 20098864 | 311865 | 95.830 | 94.666   |

| Peak # | Time (min) | Area (%) | Peak # | Time (min) | Area (%) |
|--------|------------|----------|--------|------------|----------|
| 1      | 34.527     | 50.175   | 1      | 32.815     | 4.170    |
| 2      | 37.702     | 49.825   | 2      | 35.266     | 95.830   |

**(*R,E*)-Diethyl 2-(3-(furan-3-yl)hex-1-en-5-yn-1-yl)malonate (4h):**

IR (neat): 3291 (w), 2982 (w), 2936 (w), 1729 (s), 1465 (w), 1368 (m), 1252 (m), 1174 (m), 1113 (m), 1030 (m), 970 (m), 862 (w), 784 (m), 648 (m)  $\text{cm}^{-1}$ ;  $^1\text{H}$  NMR ( $\text{CDCl}_3$ , 400 MHz):  $\delta$  7.28–7.26 (1H, m), 7.08–7.07 (1H, m), 7.00–6.98 (1H, m), 5.90 (1H, dd,  $J = 15.6, 7.2$  Hz), 5.82 (1H, dd,  $J = 15.6, 8.4$  Hz), 4.21 (2H, q,  $J = 7.2$  Hz), 4.20 (2H, q,  $J = 7.2$  Hz), 4.03 (1H, d,  $J = 8.4$  Hz), 3.69 (1H, td,  $J = 7.2, 6.8$  Hz), 2.62–2.59 (2H, m), 1.98 (1H, t,  $J = 2.8$  Hz), 1.27 (3H, t,  $J = 7.2$  Hz), 1.26 (3H, t,  $J = 7.2$  Hz);  $^{13}\text{C}$  NMR ( $\text{CDCl}_3$ , 100 MHz):  $\delta$  168.21, 168.19, 142.7, 137.3, 127.2, 125.8, 123.1, 121.0, 82.0, 70.5, 61.8, 55.6, 42.7, 25.2, 14.18, 14.16; HRMS (ESI+): Calcd for  $\text{C}_{17}\text{H}_{21}\text{O}_5$   $[\text{M}+\text{H}]^+$ : 305.13890 m/z, Found: 305.13793 m/z. Specific rotation:  $[\alpha]_{\text{D}}^{20} -30.6$  ( $c$  1.01,  $\text{CHCl}_3$ ).

Enantiomeric purity of **4h** was determined by HPLC analysis in comparison with authentic racemic material (96:4 e.r. shown; Chiralcel OJ-H column, 98.5:1.5 hexanes/*i*-PrOH, 0.8 mL/min, 220 nm).

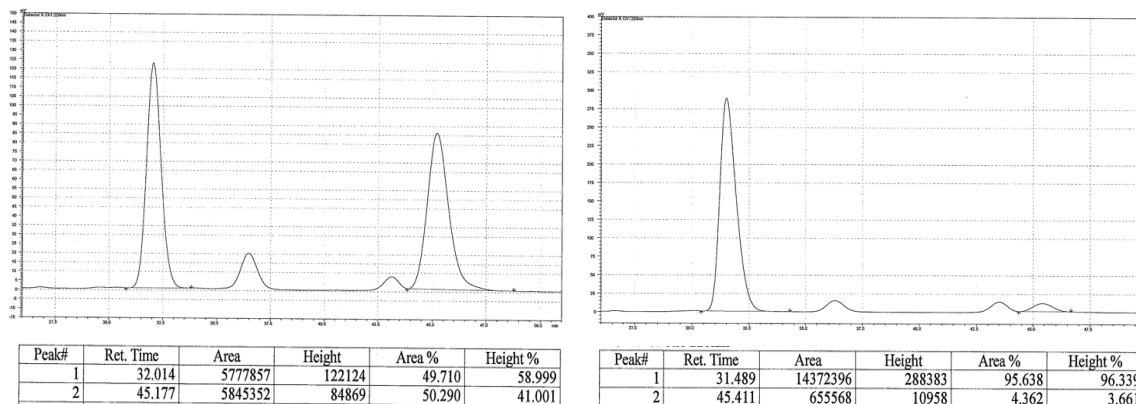

| Peak # | Time (min) | Area (%) | Peak # | Time (min) | Area (%) |
|--------|------------|----------|--------|------------|----------|
| 1      | 32.014     | 49.710   | 1      | 31.489     | 95.638   |
| 2      | 45.177     | 50.290   | 2      | 45.411     | 4.362    |

**(*R,E*)-Diethyl 2-(3-(thiophen-3-yl)hex-1-en-5-yn-1-yl)malonate (**4i**):**

IR (neat): 3293 (w), 2983 (w), 2937 (w), 1728 (s), 1505 (w), 1369 (m), 1259 (m), 1152 (s), 1113 (m), 1069 (m), 1026 (s), 969 (m), 876 (m), 790 (m), 731 (m), 639 (m), 600 (m)  $\text{cm}^{-1}$ ;  $^1\text{H}$  NMR ( $\text{CDCl}_3$ , 400 MHz):  $\delta$  7.36–7.35 (1H, m), 7.30–7.29 (1H, m), 6.32–6.31 (1H, m), 5.88–5.78 (2H, m), 4.20 (2H, q,  $J = 7.2$  Hz), 4.19 (2H, q,  $J = 7.2$  Hz), 4.03 (1H, d,  $J = 7.6$  Hz), 3.50 (1H, td,  $J = 6.4, 6.4$  Hz), 2.54–2.51 (2H, m), 1.98 (1H, t,  $J = 2.8$  Hz), 1.27 (3H, t,  $J = 7.2$  Hz), 1.26 (3H, t,  $J = 7.2$  Hz);  $^{13}\text{C}$  NMR ( $\text{CDCl}_3$ , 100 MHz):  $\delta$  168.2, 143.1, 139.3, 137.0, 126.1, 123.2, 110.0, 81.9, 70.4, 61.8, 55.5, 38.2, 24.9, 14.2; HRMS (ESI+): Calcd for  $\text{C}_{17}\text{H}_{21}\text{O}_4\text{S}_1$   $[\text{M}+\text{H}]^+$ : 321.11605  $m/z$ , Found: 321.11658  $m/z$ . Specific rotation:  $[\alpha]_D^{20} -21.2$  ( $c$  1.97,  $\text{CHCl}_3$ ).

Enantiomeric purity of **4i** was determined by HPLC analysis in comparison with authentic racemic material (92:8 e.r. shown; Chiralcel OJ–H column, 99:1 hexanes/*i*-PrOH, 0.8 mL/min, 220 nm).

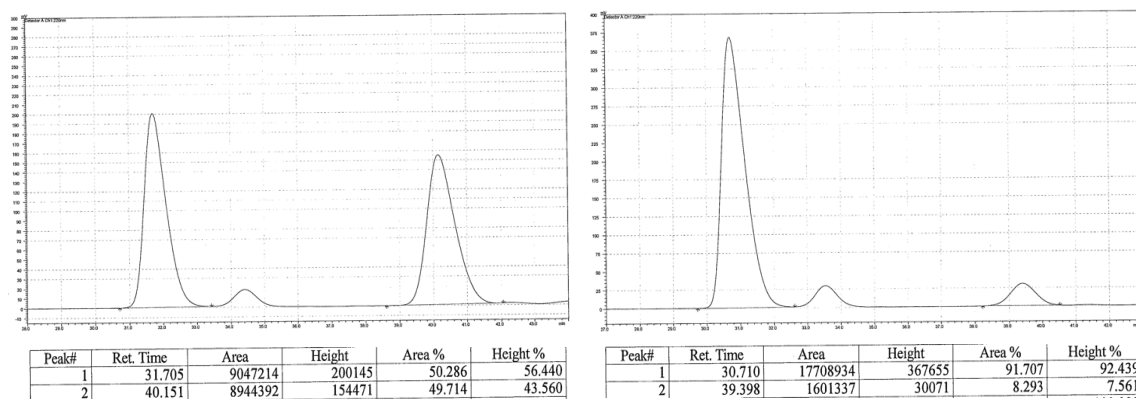

| Peak # | Time (min) | Area (%) | Peak # | Time (min) | Area (%) |
|--------|------------|----------|--------|------------|----------|
| 1      | 31.705     | 50.286   | 1      | 30.710     | 91.707   |
| 2      | 40.151     | 49.714   | 2      | 39.398     | 8.293    |

**(*R,E*)-Diethyl 2-((*R,E*)-3-((*E*)-styryl)hex-1-en-5-yn-1-yl)malonate (**4j**):**

IR (neat): 3292 (m), 2982 (m), 2935 (w), 1732 (s), 1598 (w), 1391 (m), 1248 (m), 1174 (m), 1020 (m), 969 (m), 863 (w), 750 (m), 694 (m)  $\text{cm}^{-1}$ ;  $^1\text{H}$  NMR ( $\text{CDCl}_3$ , 400 MHz):  $\delta$  7.38–7.35 (2H, m), 7.32–7.28

(2H, m), 7.24–7.20 (1H, m), 6.45 (1H, d,  $J = 16.0$  Hz), 6.20 (1H, dd,  $J = 16.0, 7.2$  Hz), 5.88–5.77 (2H, m), 4.21 (4H, q,  $J = 7.2$  Hz), 4.05 (1H, d,  $J = 8.0$  Hz), 3.22–3.15 (1H, m), 2.45–2.42 (2H, m), 2.01 (1H, t,  $J = 2.4$  Hz), 1.28 (3H, t,  $J = 7.2$  Hz), 1.27 (3H,  $J = 7.2$  Hz);  $^{13}\text{C}$  NMR ( $\text{CDCl}_3$ , 100 MHz):  $\delta$  168.2, 137.2, 137.0, 131.3, 130.3, 128.7, 127.5, 126.4, 123.1, 81.8, 70.4, 61.8, 55.7, 44.4, 24.7, 14.2; HRMS (ESI+): Calcd for  $\text{C}_{21}\text{H}_{25}\text{O}_4$   $[\text{M}+\text{H}]^+$ : 341.17528 m/z, Found: 341.17565 m/z. Specific rotation:  $[\alpha]_{\text{D}}^{20} -31.7$  ( $c$  0.65,  $\text{CHCl}_3$ ).

Enantiomeric purity of **4j** was determined by HPLC analysis in comparison with authentic racemic material (99:1 e.r. shown; Chiralcel OJ–H column, 94:6 hexanes/*i*-PrOH, 0.6 mL/min, 220 nm).

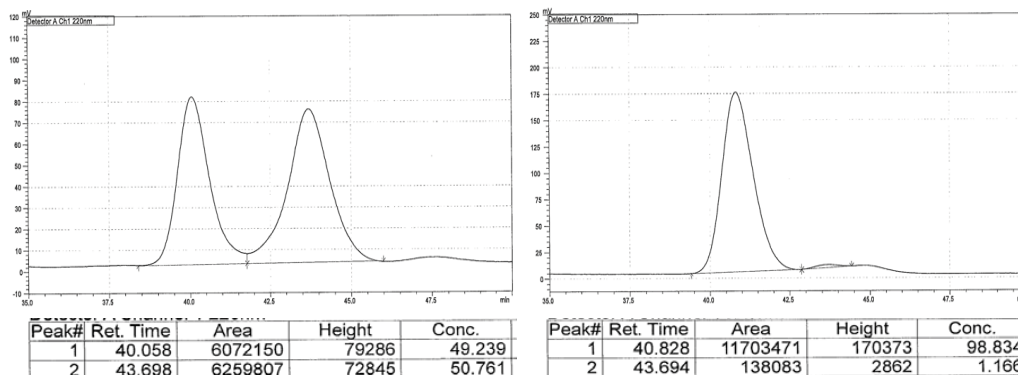

| Peak # | Time (min) | Area (%) | Peak # | Time (min) | Area (%) |
|--------|------------|----------|--------|------------|----------|
| 1      | 40.058     | 49.239   | 1      | 40.828     | 98.834   |
| 2      | 43.698     | 50.761   | 2      | 43.694     | 1.166    |

**(*R,E*)-Diethyl 2-(3-phenethylhex-1-en-5-yn-1-yl)malonate (4k):**

IR (neat): 3286 (w), 2982 (w), 2934 (w), 1730 (s), 1454 (w), 1368 (m), 1262 (m), 1147 (s), 1113 (m), 1030 (s), 971 (m), 862 (w), 748 (m), 700 (m), 639 (m)  $\text{cm}^{-1}$ ;  $^1\text{H}$  NMR ( $\text{CDCl}_3$ , 400 MHz):  $\delta$  7.30–7.26 (2H, m), 7.20–7.17 (3H, m), 5.79 (1H, dd,  $J = 15.6, 8.4$  Hz), 5.63 (1H, dd,  $J = 15.6, 8.4$  Hz), 4.23 (2H, q,  $J = 7.2$  Hz), 4.22 (2H, q,  $J = 7.2$  Hz), 4.04 (1H, d,  $J = 8.8$  Hz), 2.70–2.62 (1H, m), 2.60–2.51 (1H, m), 2.35–2.27 (3H, m), 1.97 (1H, t,  $J = 2.4$  Hz), 1.94–1.85 (1H, m), 1.76–1.67 (1H, m), 1.28 (6H, t,  $J = 7.2$  Hz);  $^{13}\text{C}$  NMR ( $\text{CDCl}_3$ , 100 MHz):  $\delta$  168.4, 168.3, 142.1, 138.5, 128.6, 128.5, 125.9, 123.2, 82.0, 70.0, 61.8, 61.7, 55.8, 40.8, 35.3, 33.3, 24.5, 14.21, 14.19; HRMS (ESI+): Calcd for  $\text{C}_{21}\text{H}_{27}\text{O}_4$   $[\text{M}+\text{H}]^+$ : 343.19093 m/z, Found: 343.19021 m/z. Specific rotation:  $[\alpha]_{\text{D}}^{20} +7.8$  ( $c$  1.26,  $\text{CHCl}_3$ ).

Enantiomeric purity of **4k** was determined by HPLC analysis in comparison with authentic racemic material (94:6 e.r. shown; Chiralcel OZ–H column, 99.5:0.5 hexanes/*i*-PrOH, 0.8 mL/min, 220 nm).



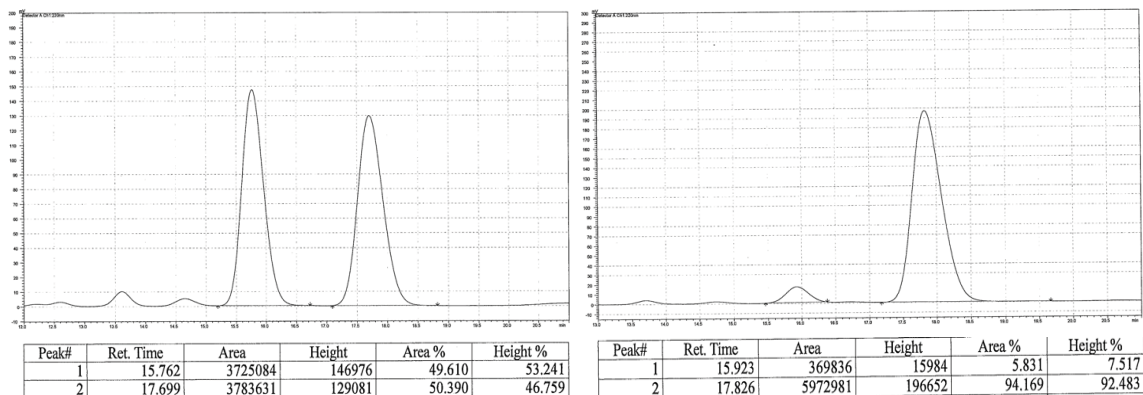

| Peak # | Time (min) | Area (%) | Peak # | Time (min) | Area (%) |
|--------|------------|----------|--------|------------|----------|
| 1      | 15.762     | 49.610   | 1      | 15.923     | 5.831    |
| 2      | 17.699     | 50.390   | 2      | 17.826     | 94.169   |

**(S,E)-Diethyl 2-(3-cyclohexylhex-1-en-5-yn-1-yl)malonate (4l):**

IR (neat): 3288 (w), 2982 (w), 2924 (m), 2852 (m), 1732 (s), 1448 (m), 1368 (m), 1265 (m), 1148 (m), 1032 (m), 972 (m), 862 (w), 630 (m)  $\text{cm}^{-1}$ ;  $^1\text{H}$  NMR ( $\text{CDCl}_3$ , 400 MHz):  $\delta$  5.70 (1H, dd,  $J = 15.2, 8.4$  Hz), 5.59 (1H, dd,  $J = 15.2, 8.8$  Hz), 4.19 (4H, q,  $J = 7.6$  Hz), 4.00 (1H, d,  $J = 8.8$  Hz), 2.30–2.26 (2H, m), 2.09–2.02 (1H, m), 1.93 (1H, t,  $J = 2.8$  Hz), 1.76–1.62 (5H, m), 1.49–1.40 (1H, m), 1.26 (3H, t,  $J = 7.2$  Hz), 1.25 (3H, t,  $J = 7.2$  Hz), 1.22–1.06 (3H, m), 1.00–0.80 (2H, m);  $^{13}\text{C}$  NMR ( $\text{CDCl}_3$ , 100 MHz):  $\delta$  168.5, 168.4, 137.7, 123.0, 82.7, 69.7, 61.7, 61.6, 55.8, 47.2, 40.0, 31.0, 29.8, 26.6, 26.53, 26.46, 21.7, 14.2; HRMS (ESI+): Calcd for  $\text{C}_{19}\text{H}_{29}\text{O}_4$   $[\text{M}+\text{H}]^+$ : 321.20658  $m/z$ , Found: 321.20727  $m/z$ . Specific rotation:  $[\alpha]_{\text{D}}^{20} +4.7$  ( $c$  1.53,  $\text{CHCl}_3$ ).

Enantiomeric purity of **4l** was determined by HPLC analysis in comparison with authentic racemic material (97:3 e.r. shown; Chiralcel OZ–H column, 99.6:0.4 hexanes/*i*-PrOH, 0.8 mL/min, 220 nm).

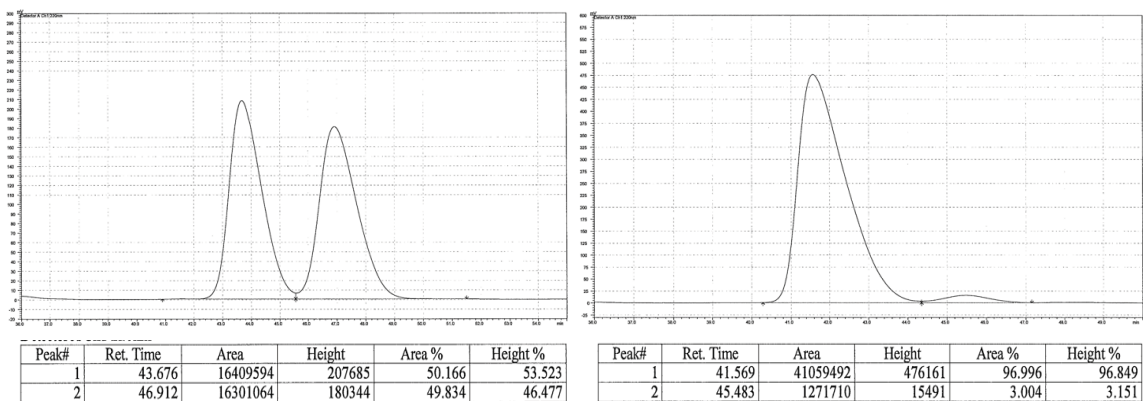

| Peak # | Time (min) | Area (%) | Peak # | Time (min) | Area (%) |
|--------|------------|----------|--------|------------|----------|
| 1      | 43.676     | 50.166   | 1      | 41.569     | 96.996   |
| 2      | 46.912     | 49.834   | 2      | 45.483     | 3.004    |

**(R,E)-Diethyl 2-(3-(tert-butyl)hex-1-en-5-yn-1-yl)malonate (4m):**

IR (neat): 3289 (w), 2962 (m), 2872 (w), 1733 (s), 1468 (w), 1368 (m), 1260 (m), 1148 (m), 1033 (m), 971 (m), 862 (w), 628 (m)  $\text{cm}^{-1}$ ;  $^1\text{H}$  NMR ( $\text{CDCl}_3$ , 400 MHz):  $\delta$  5.75 (1H, dd,  $J = 15.6, 8.8$  Hz), 5.57 (1H, dd,  $J = 15.6, 8.8$  Hz), 4.19 (4H, q,  $J = 7.2$  Hz), 4.03 (1H, d,  $J = 8.8$  Hz), 2.41 (1H, dt,  $J = 15.6, 2.8$

Hz), 2.13–2.00 (2H, m), 1.89 (1H, t,  $J = 2.8$  Hz), 1.26 (3H, t,  $J = 7.2$  Hz), 1.25 (3H, t,  $J = 7.2$  Hz), 0.88 (9H, s);  $^{13}\text{C}$  NMR ( $\text{CDCl}_3$ , 100 MHz):  $\delta$  168.5, 168.4, 136.2, 124.2, 83.7, 69.5, 61.7, 61.6, 55.8, 52.6, 33.3, 27.7, 19.6, 14.2; HRMS (ESI+): Calcd for  $\text{C}_{17}\text{H}_{27}\text{O}_4$   $[\text{M}+\text{H}]^+$ : 295.19093 m/z, Found: 295.19175 m/z. Specific rotation:  $[\alpha]_{\text{D}}^{20} -2.3$  ( $c$  1.49,  $\text{CHCl}_3$ ).

Enantiomeric purity of **4m** was determined by HPLC analysis in comparison with authentic racemic material (98:2 e.r. shown; Chiralcel OZ–H column, 99.6:0.4 hexanes/*i*-PrOH, 0.8 mL/min, 220 nm).

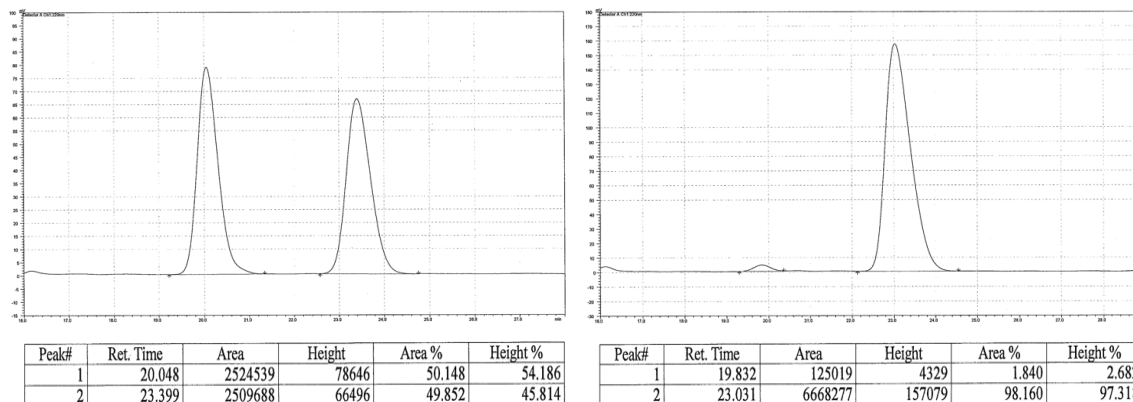

| Peak # | Time (min) | Area (%) | Peak # | Time (min) | Area (%) |
|--------|------------|----------|--------|------------|----------|
| 1      | 20.048     | 50.148   | 1      | 19.832     | 1.840    |
| 2      | 23.399     | 49.852   | 2      | 23.031     | 98.160   |

## Synthesis of Alkyl-Substituted Dienoates

### Scheme S1: Preparation of Alkyl-Substituted Dienoates

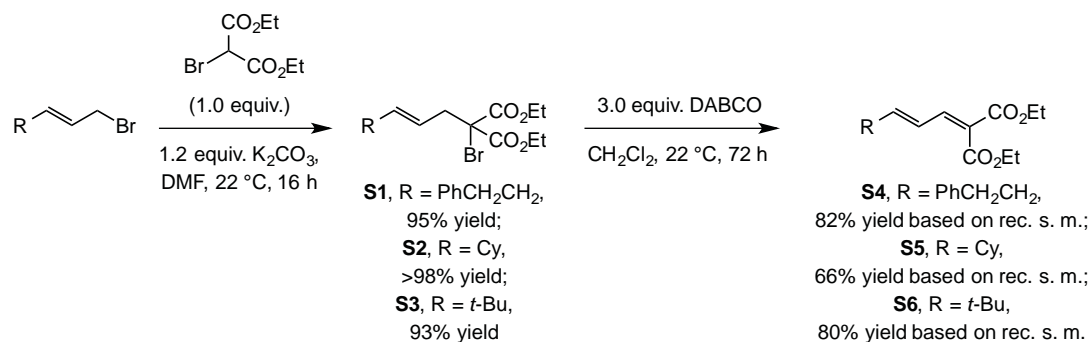

### Representative Procedure for Alkylation of Diethyl Bromomalonate

To a solution of allyl bromide<sup>7</sup> (4.00 g, 17.8 mmol) and diethyl bromomalonate (2.10 mL, 14.8 mmol) in *N,N'*-dimethylformamide (DMF, 30 mL) was added  $\text{K}_2\text{CO}_3$  (2.25 g, 16.3 mmol) at 22 °C. The mixture was allowed to stir at 22 °C for 16 h, after which water (20 mL) and diethyl ether (30 mL) was added to quench the reaction. The aqueous layer was washed with diethyl ether ( $2 \times 30$  mL), and the combined organic layers were washed with a solution of brine ( $2 \times 30$  mL), dried over  $\text{MgSO}_4$  and concentrated under vacuum. The resulting colorless oil was purified by silica gel column

(7) Fañanás-Mastral, M., Pérez, M., Bos, P. H., Rudolph, A., Harutyunyan, S. R. & Feringa, B. L. *Angew. Chem. Int. Edn* **51**, 1922–1925 (2012).

chromatography (hexanes:ethyl acetate = 50:1) to afford 5.44 g **S1** (14.2 mmol, 95% yield) as colorless oil.

**(E)-Diethyl 2-bromo-2-(5-phenylpent-2-en-1-yl)malonate (S1):**

IR (neat): 2983 (w), 2936 (w), 1739 (s), 1454 (m), 1367 (m), 1233 (s), 1191 (m), 1096 (m), 1030 (m), 969 (m), 857 (m), 746 (m), 698 (m), 650 (m)  $\text{cm}^{-1}$ ;  $^1\text{H}$  NMR ( $\text{CDCl}_3$ , 400 MHz):  $\delta$  7.30–7.26 (2H, m), 7.20–7.16 (3H, m), 5.65 (1H, dt,  $J = 15.6, 6.4$  Hz), 5.48 (1H, dt,  $J = 15.6, 6.8$  Hz), 4.26 (4H, q,  $J = 7.2$  Hz), 2.99 (2H, d,  $J = 6.8$  Hz), 2.69–2.65 (2H, m), 2.34 (2H, dt,  $J = 7.6, 7.2$  Hz), 1.28 (6H, t,  $J = 7.2$  Hz);  $^{13}\text{C}$  NMR ( $\text{CDCl}_3$ , 100 MHz):  $\delta$  166.7, 141.7, 135.9, 128.5, 128.4, 125.9, 123.4, 63.0, 62.7, 41.7, 35.8, 34.4, 14.0; HRMS (ESI+): Calcd for  $\text{C}_{18}\text{H}_{24}\text{Br}_1\text{O}_4$   $[\text{M}+\text{H}]^+$ : 383.08580 m/z, Found: 383.08507 m/z.

**(E)-Diethyl 2-bromo-2-(3-cyclohexylallyl)malonate (S2):**

IR (neat): 2981 (w), 2923 (m), 2851 (m), 1741 (s), 1447 (m), 1367 (w), 1232 (s), 1187 (m), 1095 (m), 1022 (m), 971 (m), 858 (m), 649 (w)  $\text{cm}^{-1}$ ;  $^1\text{H}$  NMR ( $\text{CDCl}_3$ , 400 MHz):  $\delta$  5.52 (1H, dd,  $J = 15.2, 6.4$  Hz), 5.37 (1H, dt,  $J = 15.2, 7.2$  Hz), 4.24 (4H, q,  $J = 7.2$  Hz), 2.94 (2H, d,  $J = 7.2$  Hz), 1.97–1.88 (1H, m), 1.72–1.60 (6H, m), 1.27 (6H, t,  $J = 7.2$  Hz), 1.25–0.97 (5H, m);  $^{13}\text{C}$  NMR ( $\text{CDCl}_3$ , 100 MHz):  $\delta$  166.7, 142.8, 120.2, 63.0, 41.8, 40.9, 32.9, 26.2, 26.0, 14.0; HRMS (ESI+): Calcd for  $\text{C}_{16}\text{H}_{26}\text{Br}_1\text{O}_4$   $[\text{M}+\text{H}]^+$ : 361.10145 m/z, Found: 361.10139 m/z.

**(E)-Diethyl 2-bromo-2-(4,4-dimethylpent-2-en-1-yl)malonate (S3):**

IR (neat): 2959 (m), 2867 (w), 1741 (s), 1446 (w), 1365 (m), 1256 (s), 1175 (s), 1095 (m), 1022 (m), 974 (m), 858 (m), 650 (w)  $\text{cm}^{-1}$ ;  $^1\text{H}$  NMR ( $\text{CDCl}_3$ , 400 MHz):  $\delta$  5.60 (1H, d,  $J = 15.6$  Hz), 5.32 (1H, dt,  $J = 15.6, 7.2$  Hz), 4.24 (4H, q,  $J = 7.2$  Hz), 2.95 (2H, d,  $J = 7.2$  Hz), 1.28 (3H, t,  $J = 7.2$  Hz), 0.98 (9H, s);  $^{13}\text{C}$  NMR ( $\text{CDCl}_3$ , 100 MHz):  $\delta$  166.7, 147.8, 117.5, 63.00, 62.96, 41.8, 33.3, 29.5, 14.1; HRMS (ESI+): Calcd for  $\text{C}_{14}\text{H}_{24}\text{Br}_1\text{O}_4$   $[\text{M}+\text{H}]^+$ : 335.08580 m/z, Found: 335.08415 m/z.

**Representative Procedure for Elimination of Bromo-malonates**

To a solution of bromo-malonate **S1** (5.44 g, 14.2 mmol) in  $\text{CH}_2\text{Cl}_2$  (50 mL) was added 1,4-diazabicyclo[2.2.2]octane (DABCO) (2.39 g, 21.3 mmol) at 22 °C. The solution was allowed to stir at 22 °C for 72 h. Water (30 mL) was then added to quench the reaction, and the aqueous layer was washed with  $\text{CH}_2\text{Cl}_2$  (2  $\times$  30 mL). The combined organic layers were dried over  $\text{MgSO}_4$  and concentrated under vacuum. The resulting yellow oil was purified by silica gel column chromatography (hexanes:ethyl acetate = 30:1 to 10:1) to afford 885 mg **S4** (2.9 mmol, 21% yield) and 4.07g of recovered **S1** (10.6 mmol, 75% yield) as yellow oil.

**(E)-Diethyl 2-(5-phenylpent-2-en-1-ylidene)malonate (S4):**

IR (neat): 2983 (w), 2937 (w), 1715 (s), 1636 (m), 1454 (m), 1241 (s), 1211 (s), 1094 (m), 1025 (m), 982 (w), 748 (m), 700 (m)  $\text{cm}^{-1}$ ;  $^1\text{H}$  NMR ( $\text{CDCl}_3$ , 400 MHz):  $\delta$  7.32–7.27 (3H, m), 7.22–7.16 (3H, m), 6.54 (1H, dd,  $J = 15.2, 11.6$  Hz), 6.32 (1H, dt,  $J = 15.2, 7.2$  Hz), 4.31 (2H, q,  $J = 7.2$  Hz), 4.25 (2H, q,  $J = 7.2$  Hz), 2.78–2.75 (2H, m), 2.57–2.52 (2H, m), 1.33 (3H, t,  $J = 7.2$  Hz), 1.30 (3H, t,  $J = 7.2$  Hz);  $^{13}\text{C}$  NMR ( $\text{CDCl}_3$ , 100 MHz):  $\delta$  165.5, 164.9, 148.2, 145.2, 141.0, 128.6, 128.5, 126.4, 126.3, 124.3, 61.39,

61.36, 35.1, 35.0, 14.31, 14.29; HRMS (ESI+): Calcd for  $C_{18}H_{23}O_4$   $[M+H]^+$ : 303.15963 m/z, Found: 303.16021 m/z.

**(E)-Diethyl 2-(3-cyclohexylallylidene)malonate (S5):**

IR (neat): 2982 (m), 2925 (m), 2852 (m), 1712 (s), 1632 (m), 1448 (m), 1377 (m), 1239 (s), 1122 (m), 1025 (s), 982 (m), 862 (m), 734 (w)  $cm^{-1}$ ;  $^1H$  NMR ( $CDCl_3$ , 400 MHz):  $\delta$  7.32 (1H, d,  $J = 11.2$  Hz), 6.48 (1H, ddd,  $J = 15.2, 11.2, 1.2$  Hz), 6.25 (1H, dd,  $J = 15.2, 6.8$  Hz), 4.32 (2H, q,  $J = 7.2$  Hz), 4.24 (2H, q,  $J = 7.2$  Hz), 2.18–2.11 (1H, m), 1.79–1.62 (5H, m), 1.34 (3H, t,  $J = 7.2$  Hz), 1.29 (3H, t,  $J = 7.2$  Hz), 1.25–1.08 (6H, m);  $^{13}C$  NMR ( $CDCl_3$ , 100 MHz):  $\delta$  165.6, 165.0, 155.1, 146.1, 123.8, 123.4, 61.31, 61.28, 41.6, 32.2, 26.1, 25.8, 14.35, 14.31; HRMS (ESI+): Calcd for  $C_{16}H_{25}O_4$   $[M+H]^+$ : 281.17528 m/z, Found: 281.17653 m/z.

**(E)-Diethyl 2-(4,4-dimethylpent-2-en-1-ylidene)malonate (S6):**

IR (neat): 2962 (m), 2904 (w), 2870 (w), 1715 (s), 1632 (m), 1463 (m), 1366 (m), 1235 (s), 1195 (s), 1144 (m), 1060 (s), 1030 (m), 985 (m), 865 (w), 799 (w)  $cm^{-1}$ ;  $^1H$  NMR ( $CDCl_3$ , 400 MHz):  $\delta$  7.34 (1H, d,  $J = 11.2$  Hz), 6.46 (1H, dd,  $J = 15.6, 11.6$  Hz), 6.31 (1H, d,  $J = 15.2$  Hz), 4.33 (2H, q,  $J = 7.2$  Hz), 4.24 (2H, q,  $J = 7.2$  Hz), 1.34 (3H, t,  $J = 7.2$  Hz), 1.30 (3H, t,  $J = 7.2$  Hz), 1.07 (9H, s);  $^{13}C$  NMR ( $CDCl_3$ , 100 MHz):  $\delta$  165.6, 165.0, 160.0, 146.3, 124.0, 120.9, 61.3, 34.5, 29.0, 14.35, 14.31; HRMS (ESI+): Calcd for  $C_{14}H_{23}O_4$   $[M+H]^+$ : 255.15963 m/z, Found: 255.16064 m/z.

**Synthesis of Dienoates with a Trisubstituted Alkene**

**Scheme S2:** Synthesis of Dienoates for Formation of All-Carbon Quaternary Stereogenic Centers

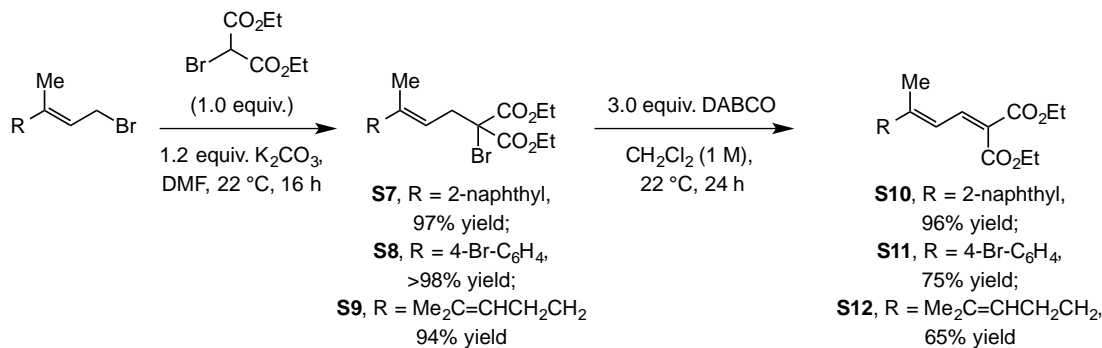

**Representative Procedure for Alkylation of Diethyl Bromomalonate with Allyl Bromide**

Bromo-malonates **S7-9** were prepared following a procedure described above (Page S16).

**(E)-Diethyl 2-bromo-2-(3-(naphthalen-2-yl)but-2-en-1-yl)malonate (S7):**

IR (neat): 3055 (w), 2982 (m), 2938 (w), 1740 (s), 1445 (m), 1367 (m), 1260 (s), 1183 (m), 1095 (m), 1036 (m), 892 (w), 858 (m), 748 (w)  $cm^{-1}$ ;  $^1H$  NMR ( $CDCl_3$ , 400 MHz):  $\delta$  7.84–7.77 (4H, m), 7.55 (1H, dd,  $J = 8.4, 2.0$  Hz), 7.49–7.42 (2H, m), 5.91 (1H, t,  $J = 7.2$  Hz), 4.31 (4H, q,  $J = 7.2$  Hz), 2.19 (3H, s), 1.31 (6H, t,  $J = 7.2$  Hz);  $^{13}C$  NMR ( $CDCl_3$ , 100 MHz):  $\delta$  166.9, 140.6, 139.5, 133.5, 132.8, 128.2, 127.9, 127.6, 126.2, 125.8, 124.6, 124.5, 121.3, 63.2, 62.6, 37.9, 16.7, 14.0; HRMS (ESI+): Calcd for  $C_{21}H_{24}BrO_4$   $[M+H]^+$ : 419.08580 m/z, Found: 419.08399 m/z.

**(E)-Diethyl 2-bromo-2-(3-(4-bromophenyl)but-2-en-1-yl)malonate (S8):**

IR (neat): 2982 (w), 2937 (w), 1738 (s), 1587 (w) 1465 (m), 1400 (m), 1367 (m), 1256 (s), 1182 (s), 1076 (m), 1007 (s), 895 (m), 813 (m), 743 (w), 651 (m)  $\text{cm}^{-1}$ ;  $^1\text{H}$  NMR ( $\text{CDCl}_3$ , 400 MHz):  $\delta$  6.57 (2H, d,  $J = 8.4$  Hz), 6.37 (2H, d,  $J = 8.4$  Hz), 4.88 (1H, t,  $J = 6.8$  Hz), 3.44 (4H, q,  $J = 7.2$  Hz), 2.38 (1H, d,  $J = 6.8$  Hz), 1.19 (3H, s), 0.44 (6H, t,  $J = 7.2$  Hz);  $^{13}\text{C}$  NMR ( $\text{CDCl}_3$ , 100 MHz):  $\delta$  166.8, 142.3, 138.7, 131.4, 127.7, 127.6, 121.4, 63.2, 62.4, 37.7, 16.5, 14.0; HRMS (ESI+): Calcd for  $\text{C}_{17}\text{H}_{21}\text{Br}_2\text{O}_4$   $[\text{M}+\text{H}]^+$ : 448.97861 m/z, Found: 448.97983 m/z.

**(E)-Diethyl 2-bromo-2-(3,7-dimethylocta-2,6-dien-1-yl)malonate (S9):**

IR (neat): 2981 (m), 2926 (m), 1741 (s), 1445 (m), 1367 (m), 1235 (s), 1175 (m), 1096 (m), 1023 (m), 892 (m), 650 (w)  $\text{cm}^{-1}$ ;  $^1\text{H}$  NMR ( $\text{CDCl}_3$ , 400 MHz):  $\delta$  5.14 (1H, t,  $J = 7.2$  Hz), 5.06 (1H, t,  $J = 6.8$  Hz), 4.25 (2H, q,  $J = 7.2$  Hz), 4.24 (2H, q,  $J = 7.2$  Hz), 3.01 (1H, d,  $J = 6.8$  Hz), 2.09–1.93 (4H, m), 1.66 (3H, s), 1.63 (3H, s), 1.58 (3H, s), 1.27 (6H, t,  $J = 7.2$  Hz);  $^{13}\text{C}$  NMR ( $\text{CDCl}_3$ , 100 MHz):  $\delta$  166.9, 140.6, 131.7, 124.0, 117.1, 63.1, 63.0, 39.9, 37.1, 26.6, 25.8, 17.8, 16.7, 14.0; HRMS (ESI+): Calcd for  $\text{C}_{17}\text{H}_{28}\text{Br}_1\text{O}_4$   $[\text{M}+\text{H}]^+$ : 375.11710 m/z, Found: 375.11615 m/z.

**Representative Procedure for Elimination of Bromomalonate**

To a solution of bromo-malonate **S9** (3.54 g, 9.4 mmol) in  $\text{CH}_2\text{Cl}_2$  (10 mL) was added DABCO (3.18 g, 28.3 mmol) at 22 °C. The solution was allowed to stir at 22 °C for 24 h, after which water (30 mL) was added to quench the reaction. The aqueous layer was then washed with  $\text{CH}_2\text{Cl}_2$  (2  $\times$  30 mL). The combined organic layers were dried over  $\text{MgSO}_4$  and concentrated under vacuum. The resulting yellow oil was purified by silica gel chromatography (hexanes:ethyl acetate = 12:1) to afford 1.81 g **S12** (6.1 mmol, 65% yield) as yellow oil.

**(E)-Diethyl 2-(3-(naphthalen-2-yl)but-2-en-1-ylidene)malonate (S10):**

IR (neat): 3058 (w), 2981 (m), 2937 (w), 1710 (s), 1604 (s), 1466 (m), 1366 (m), 1244 (s), 1164 (s), 1062 (s), 1023 (m), 857 (m), 749 (m)  $\text{cm}^{-1}$ ;  $^1\text{H}$  NMR ( $\text{CDCl}_3$ , 400 MHz):  $\delta$  7.95–7.81 (5H, m), 7.64 (1H, dd,  $J = 8.4, 1.6$  Hz), 7.52–7.47 (2H, m), 7.06 (1H, d,  $J = 12.0$  Hz), 4.38 (2H, q,  $J = 7.2$  Hz), 4.31 (2H, q,  $J = 7.2$  Hz), 2.46 (3H, d,  $J = 1.6$  Hz), 1.39 (3H, t,  $J = 7.2$  Hz), 1.35 (3H, t,  $J = 7.2$  Hz);  $^{13}\text{C}$  NMR ( $\text{CDCl}_3$ , 100 MHz):  $\delta$  165.9, 165.1, 149.6, 140.1, 139.0, 133.6, 133.3, 128.6, 128.3, 127.7, 126.8, 126.6, 126.0, 125.3, 123.9, 122.2, 61.44, 61.41, 16.8, 14.4, 14.3; HRMS (ESI+): Calcd for  $\text{C}_{21}\text{H}_{23}\text{O}_4$   $[\text{M}+\text{H}]^+$ : 339.15963 m/z, Found: 339.15929 m/z.

**(E)-Diethyl 2-(3-(4-bromophenyl)but-2-en-1-ylidene)malonate (S11):**

IR (neat): 2981 (w), 2937 (w), 2906 (w), 1707 (s), 1610 (m), 1581 (m), 1445 (m), 1367 (m), 1275 (m), 1234 (s), 1211 (s), 1165 (s), 1062 (s), 1006 (m), 948 (w), 863 (w), 821 (m)  $\text{cm}^{-1}$ ;  $^1\text{H}$  NMR ( $\text{CDCl}_3$ , 400 MHz):  $\delta$  7.79 (1H, d,  $J = 12.4$  Hz), 7.49 (2H, d,  $J = 8.4$  Hz), 7.35 (2H, d,  $J = 8.4$  Hz), 6.86 (1H, d,  $J = 12.4$  Hz), 4.34 (2H, q,  $J = 7.2$  Hz), 4.28 (2H, q,  $J = 7.2$  Hz), 2.31 (3H, s), 1.35 (3H, t,  $J = 7.2$  Hz), 1.32 (3H, t,  $J = 7.2$  Hz);  $^{13}\text{C}$  NMR ( $\text{CDCl}_3$ , 100 MHz):  $\delta$  165.8, 165.0, 148.4, 140.8, 139.8, 131.8, 127.9, 125.9, 123.2, 122.1, 61.5, 16.7, 14.4, 14.3; HRMS (ESI+): Calcd for  $\text{C}_{17}\text{H}_{20}\text{Br}_1\text{O}_4$   $[\text{M}+\text{H}]^+$ : 367.05450 m/z, Found: 367.05310 m/z.

**(E)-Diethyl 2-(3,7-dimethylocta-2,6-dien-1-ylidene)malonate (S12):**

IR (neat): 2980 (m), 2932 (m), 1715 (s), 1627 (m), 1446 (m), 1380 (m), 1246 (s), 1204 (s), 1143 (m), 1026 (s), 864 (w), 797 (w)  $\text{cm}^{-1}$ ;  $^1\text{H}$  NMR ( $\text{CDCl}_3$ , 400 MHz):  $\delta$  7.65 (1H, d,  $J = 12.0$  Hz), 6.26 (1H, d,  $J = 12.0$  Hz), 5.05 (1H, t,  $J = 6.8$  Hz), 4.31 (2H, q,  $J = 7.2$  Hz), 4.24 (2H, q,  $J = 7.2$  Hz), 2.21–2.10 (4H, m), 1.93 (3H, s), 1.67 (3H, s), 1.58 (3H, s), 1.33 (3H, t,  $J = 7.2$  Hz), 1.29 (3H, t,  $J = 7.2$  Hz);  $^{13}\text{C}$  NMR ( $\text{CDCl}_3$ , 100 MHz):  $\delta$  166.0, 165.2, 155.2, 140.4, 132.6, 123.4, 123.2, 120.5, 61.24, 61.21, 40.9, 26.3, 25.8, 17.8, 17.7, 14.31, 14.30; HRMS (ESI+): Calcd for  $\text{C}_{17}\text{H}_{27}\text{O}_4$   $[\text{M}+\text{H}]^+$ : 295.19093 m/z, Found: 295.19105 m/z.

**Representative Procedure for Catalytic Enantioselective 1,6-Conjugate Propargyl Additions; Quaternary Carbon Centers**

In an  $\text{N}_2$ -filled glove box, imidazolium salt **9b** (4.6 mg, 0.010 mmol),  $\text{CuCl}$  (1.0 mg, 0.010 mmol),  $\text{NaOt-Bu}$  (1.9 mg, 0.020 mmol) and  $\text{NaOPh}$  (17.4 mg, 0.15 mmol) and THF (0.5 mL) are added into an oven-dried vial equipped with a stirring bar. The mixture is allowed to premix for 2 h at 22  $^\circ\text{C}$ . The resulting mixture is then added into a separate oven-dried vial containing allenylboronic acid pinacol ester (36.0  $\mu\text{L}$ , 0.20 mmol). The vial is sealed with a Teflon screw cap and removed from the glove box. The mixture is then allowed to stir at 22  $^\circ\text{C}$  for 30 min. Then dienolate **S10** (33.8 mg, 0.10 mmol) is added into the solution by a syringe, and the solution is allowed to stir at 22  $^\circ\text{C}$  for 24 h. The mixture is filtered through a short plug of Celite and silica gel eluting with diethyl ether. The filtrate is washed with a 1M aqueous solution of  $\text{NaOH}$ , dried over  $\text{MgSO}_4$  and concentrated *in vacuo*. The resulting yellow oil is purified by silica gel chromatography (hexanes:ethyl acetate = 20:1) to give 30.2 mg **10a** (0.080 mmol, 80% yield) as colorless oil.

**(R,E)-Diethyl 2-(3-methyl-3-(naphthalen-2-yl)hex-1-en-5-yn-1-yl)malonate (10a):**

IR (neat): 3293 (w), 2980 (m), 2937 (w), 1731 (s), 1600 (w), 1463 (w), 1368 (m), 1249 (m), 1175 (m), 1096 (m), 975 (w), 858 (m), 819 (m), 750 (m), 645 (w)  $\text{cm}^{-1}$ ;  $^1\text{H}$  NMR ( $\text{CDCl}_3$ , 400 MHz):  $\delta$  7.83–7.78 (4H, m), 7.49–7.43 (3H, m), 6.05 (1H, d,  $J = 16.0$  Hz), 5.85 (1H, dd,  $J = 16.0, 8.8$  Hz), 4.24 (4H, q,  $J = 7.2$  Hz), 4.10 (1H, d,  $J = 8.8$  Hz), 2.80 (1H, dd,  $J = 16.4, 2.8$  Hz), 2.73 (1H, dd,  $J = 16.4, 2.8$  Hz), 1.95 (1H, t,  $J = 2.8$  Hz), 1.64 (3H, s), 1.292 (3H, t,  $J = 7.2$  Hz), 1.289 (3H, t,  $J = 7.2$  Hz);  $^{13}\text{C}$  NMR ( $\text{CDCl}_3$ , 100 MHz):  $\delta$  168.3, 142.9, 142.8, 133.3, 132.2, 128.2, 127.9, 127.5, 126.1, 125.9, 125.4, 125.0, 120.9, 81.4, 71.2, 61.8, 55.8, 44.1, 31.3, 25.8, 14.2; HRMS (ESI+): Calcd for  $\text{C}_{24}\text{H}_{27}\text{O}_4$   $[\text{M}+\text{H}]^+$ : 379.19093 m/z, Found: 379.19093 m/z. Specific rotation:  $[\alpha]_D^{20} -9.1$  ( $c$  2.03,  $\text{CHCl}_3$ ).

Enantiomeric purity of **10a** was determined by HPLC analysis in comparison with authentic racemic material (95:5 e.r. shown; Chiralcel OZ-H column, 99.5:0.5 hexanes/*i*-PrOH, 0.6 mL/min, 220 nm).

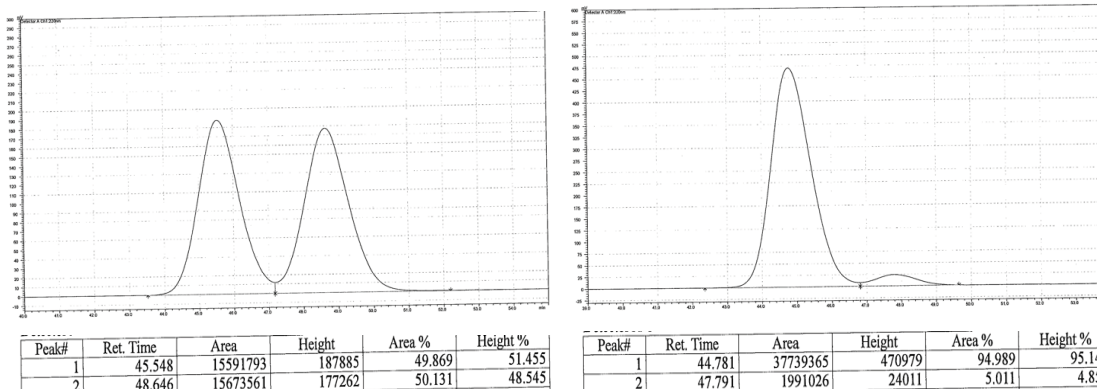

| Peak # | Time (min) | Area (%) | Peak # | Time (min) | Area (%) |
|--------|------------|----------|--------|------------|----------|
| 1      | 45.548     | 49.869   | 1      | 44.781     | 94.989   |
| 2      | 48.646     | 50.131   | 2      | 47.791     | 5.011    |

**(*R,E*)-Diethyl 2-(3-(4-bromophenyl)-3-methylhex-1-en-5-yn-1-yl)malonate (10b):**

IR (neat): 3294 (m), 2980 (m), 2936 (w), 1732 (s), 1490 (m), 1369 (m), 1262 (m), 1177 (m), 1009 (m), 861 (w), 824 (w), 647 (w)  $\text{cm}^{-1}$ ;  $^1\text{H}$  NMR ( $\text{CDCl}_3$ , 400 MHz):  $\delta$  7.42 (2H, d,  $J = 8.0$  Hz), 7.21 (2H, d,  $J = 8.0$  Hz), 5.93 (1H, d,  $J = 16.4$  Hz), 5.78 (1H, dd,  $J = 16.4, 8.4$  Hz), 4.22 (4H, q,  $J = 7.2$  Hz), 4.05 (1H, d,  $J = 8.8$  Hz), 2.65 (1H, dd,  $J = 16.4, 2.8$  Hz), 2.58 (1H, dd,  $J = 16.8, 2.4$  Hz), 1.94 (1H, t,  $J = 2.8$  Hz), 1.49 (3H, s), 1.28 (6H, t,  $J = 7.2$  Hz);  $^{13}\text{C}$  NMR ( $\text{CDCl}_3$ , 100 MHz):  $\delta$  168.3, 144.5, 142.4, 131.4, 128.6, 121.0, 120.6, 81.0, 71.3, 61.8, 55.7, 43.7, 31.3, 25.9, 14.2; HRMS (ESI+): Calcd for  $\text{C}_{20}\text{H}_{24}\text{Br}_1\text{O}_4$   $[\text{M}+\text{H}]^+$ : 407.08580  $m/z$ , Found: 407.08427  $m/z$ . Specific rotation:  $[\alpha]_D^{20} -6.9$  ( $c$  1.67,  $\text{CHCl}_3$ ).

Enantiomeric purity of **10b** was determined by HPLC analysis in comparison with authentic racemic material (95:5 e.r. shown; Chiralcel OZ-H column, 99.5:0.5 hexanes/*i*-PrOH, 0.6 mL/min, 220 nm).

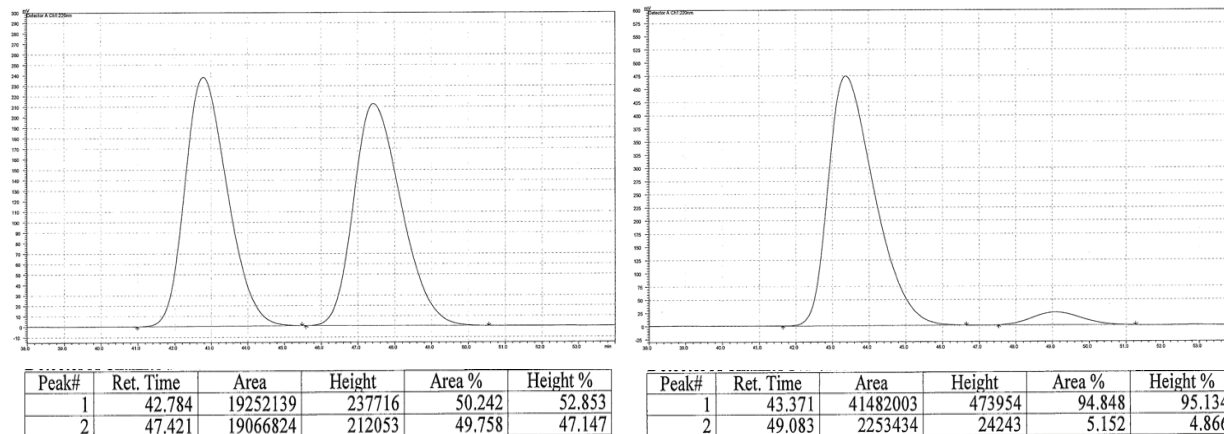

| Peak # | Time (min) | Area (%) | Peak # | Time (min) | Area (%) |
|--------|------------|----------|--------|------------|----------|
| 1      | 42.784     | 50.242   | 1      | 43.371     | 94.848   |
| 2      | 47.421     | 49.758   | 2      | 49.083     | 5.152    |

**(*R,E*)-Diethyl 2-(3,7-dimethyl-3-(prop-2-yn-1-yl)octa-1,6-dien-1-yl)malonate (10c):**

IR (neat): 3291 (m), 2968 (m), 2918 (m), 1734 (s), 1447 (m), 1369 (m), 1255 (m), 1176 (m), 1149 (m), 1033 (m), 974 (m), 863 (w), 636 (m)  $\text{cm}^{-1}$ ;  $^1\text{H}$  NMR ( $\text{CDCl}_3$ , 400 MHz):  $\delta$  5.70–5.61 (2H, m), 5.07 (1H, t,  $J = 7.2$  Hz), 4.19 (4H, q,  $J = 7.2$  Hz), 3.99 (1H, dd,  $J = 5.6, 2.4$  Hz), 2.21–2.20 (2H, m), 1.96

(1H, t,  $J = 2.8$  Hz), 1.90–1.82 (2H, m), 1.66 (3H, s), 1.57 (3H, s), 1.51–1.38 (2H, m), 1.26 (3H, t,  $J = 7.2$  Hz), 1.25 (3H, t,  $J = 7.2$  Hz), 1.11 (3H, s);  $^{13}\text{C}$  NMR ( $\text{CDCl}_3$ , 100 MHz):  $\delta$  168.5, 143.2, 131.6, 124.5, 120.1, 81.6, 70.5, 61.7, 55.9, 39.9, 39.2, 30.5, 25.8, 23.6, 23.0, 17.7, 14.2; HRMS (ESI+): Calcd for  $\text{C}_{20}\text{H}_{31}\text{O}_4$   $[\text{M}+\text{H}]^+$ : 335.22223 m/z, Found: 335.22233 m/z.

Enantiomeric purity of **10c** was determined by HPLC analysis in comparison with authentic racemic material (95:5 e.r. shown; Chiralpak AD–H column, 99.9:0.1 hexanes/*i*-PrOH, 0.6 mL/min, 220 nm). Specific rotation:  $[\alpha]_{\text{D}}^{20} -3.1$  (c 1.28,  $\text{CHCl}_3$ ).

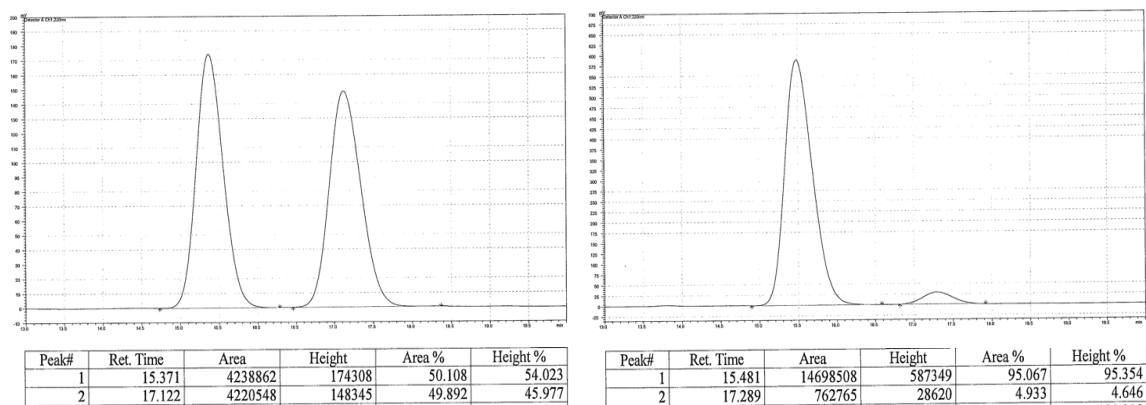

| Peak # | Time (min) | Area (%) | Peak # | Time (min) | Area (%) |
|--------|------------|----------|--------|------------|----------|
| 1      | 15.371     | 50.108   | 1      | 15.481     | 95.067   |
| 2      | 17.122     | 49.892   | 2      | 17.289     | 4.933    |

## Catalytic Multicomponent Cu–B Additions to Allenes/1,6-Conjugate Additions

In an  $\text{N}_2$ -filled glove box, imidazolium salt **9d** (2.2 mg, 0.0050 mmol),  $\text{CuCl}$  (0.5 mg, 0.0050 mmol),  $\text{NaOt-Bu}$  (0.9 mg, 0.010 mmol) and  $\text{NaOPh}$  (17.4 mg, 0.15 mmol) and THF (0.5 mL) are added into an oven-dried vial equipped with a stirring bar. The mixture is allowed to pre-mix for 2 h at 22 °C. The resulting mixture is then added into a separate oven-dried vial containing bis(pinacolato)diboron (38.1 mg, 0.15 mmol). The vial is sealed with a Teflon screw cap and removed from the glove box. The mixture is allowed to stir at 22 °C for 30 min, after which allene **11** (29.8 mg, 0.15 mmol) and dienophile **1a** (27.4 mg, 0.10 mmol) are added into the solution by syringe. The solution is allowed to stir at 22 °C for 16 h. The mixture is then filtered through a short plug of Celite and silica gel eluting with diethyl ether. The filtrate is washed with a 1M aqueous solution of  $\text{NaOH}$ , dried over  $\text{MgSO}_4$  and concentrated *in vacuo*. The resulting yellow oil is purified by silica gel chromatography (hexanes:ethyl acetate = 25:1) to furnish 37.4 mg **12a** (0.062 mmol, 62% yield) as colorless oil.

### (*E*)-Diethyl 2-(4-(2-((*tert*-butyldimethylsilyloxy)ethyl)-3-phenyl-5-(4,4,5,5-tetramethyl-1,3,2-dioxaborolan-2-yl)hexa-1,5-dien-1-yl)malonate (**12a**):

IR (neat): 3028 (m), 2978 (m), 2955 (m), 2857 (m), 1734 (s), 1417 (m), 1305 (m), 1252 (m), 1141 (s), 1094 (s), 1032 (m), 968 (m), 834 (s), 775 (s), 699 (s), 619 (w)  $\text{cm}^{-1}$ ;  $^1\text{H}$  NMR ( $\text{CDCl}_3$ , 400 MHz):  $\delta$  7.21–7.17 (2H, m), 7.10–7.06 (3H, m), 5.80–5.78 (2H, m), 5.63 (1H, d,  $J = 3.2$  Hz), 5.32 (1H, d,  $J = 3.6$  Hz), 4.21 (2H, q,  $J = 7.2$  Hz), 4.13 (2H, q,  $J = 7.2$  Hz), 3.99–3.97 (1H, m), 3.63–3.58 (1H, m),



3.55–3.50 (1H, m), 3.44–3.38 (1H, m), 2.60 (1H, td,  $J = 11.2, 2.8$  Hz), 1.97–1.88 (1H, m), 1.70–1.61 (1H, m), 1.28 (3H, t,  $J = 7.2$  Hz), 1.23 (6H, s), 1.18 (3H, t,  $J = 7.2$  Hz), 1.18 (6H, s), 0.88 (9H, s), 0.002 (3H, s), –0.003 (3H, s);  $^{13}\text{C}$  NMR ( $\text{CDCl}_3$ , 100 MHz):  $\delta$  168.5, 168.3, 143.7, 139.6, 132.2, 128.5, 128.3, 126.0, 122.4, 83.2, 61.8, 61.7, 61.6, 55.8, 53.5, 48.2, 35.0, 26.1, 25.0, 24.8, 18.4, 14.2, 14.1, –5.12, –5.11; HRMS (ESI+): Calcd for  $\text{C}_{33}\text{H}_{54}\text{B}_1\text{O}_7\text{Si}_1$   $[\text{M}+\text{H}]^+$ : 601.37318 m/z, Found: 601.37467 m/z.

Enantiomeric purity of **12a** was determined by HPLC analysis in comparison with authentic racemic material (96:4 e.r. shown; Chiralcel OZ–H column, 99.9:0.1 hexanes/*i*-PrOH, 0.8 mL/min, 220 nm). Specific rotation:  $[\alpha]_{\text{D}}^{20} -10.6$  ( $c$  1.56,  $\text{CHCl}_3$ ).

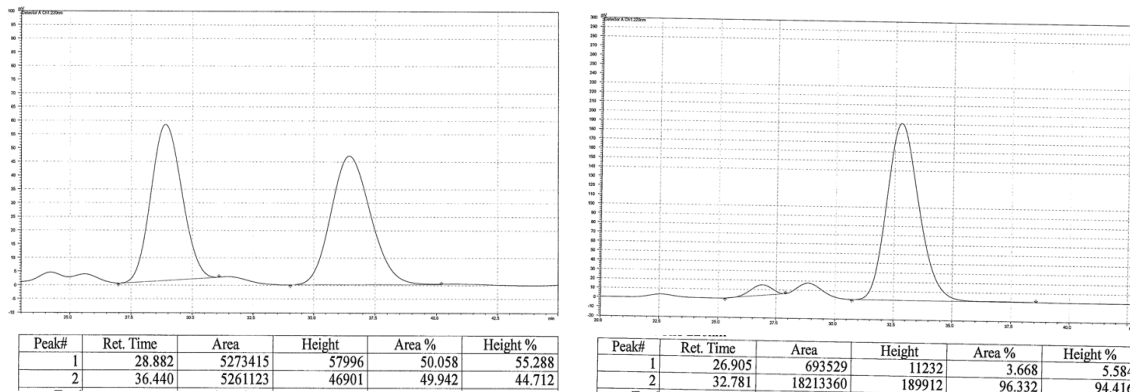

| Peak # | Time (min) | Area (%) | Peak # | Time (min) | Area (%) |
|--------|------------|----------|--------|------------|----------|
| 1      | 28.882     | 50.058   | 1      | 26.905     | 3.668    |
| 2      | 36.440     | 49.942   | 2      | 32.781     | 96.332   |

**Diethyl 2-((3*S*,4*S*,*E*)-4-(2-((*tert*-butyldimethylsilyl)oxy)ethyl)-3-(2-methoxyphenyl)-5-(4,4,5,5-tetramethyl-1,3,2-dioxaborolan-2-yl)hexa-1,5-dien-1-yl)malonate (**12b**):**

IR (neat): 2978 (m), 2955 (m), 2931 (m), 2857 (m), 1734 (s), 1598 (w), 1464 (m) 1367 (m), 1305 (m), 1243 (s), 1142 (s), 1095 (s), 1031 (s), 970 (m), 835 (s), 775 (m), 751 (m), 701 (w)  $\text{cm}^{-1}$ ;  $^1\text{H}$  NMR ( $\text{CDCl}_3$ , 400 MHz):  $\delta$  7.09–7.03 (2H, m), 6.79–6.71 (2H, m), 5.94 (1H, dd,  $J = 15.2, 9.2$  Hz), 5.79 (1H, dd,  $J = 15.2, 9.2$  Hz), 5.58 (1H, d,  $J = 4.0$  Hz), 5.38 (1H, d,  $J = 3.6$  Hz), 4.20 (2H, q,  $J = 7.2$  Hz), 4.10 (2H, q,  $J = 7.2$  Hz), 3.97 (1H, d,  $J = 9.2$  Hz), 3.83–3.76 (1H, m), 3.75 (3H, s), 3.56–3.49 (1H, m), 3.45–3.36 (1H, m), 2.87 (1H, td,  $J = 6.8, 2.8$  Hz), 1.94–1.85 (1H, m), 1.72–1.63 (1H, m), 1.27 (3H, t,  $J = 7.2$  Hz), 1.21 (6H, s), 1.18 (3H, t,  $J = 7.2$  Hz), 1.16 (6H, s), 0.88 (9H, s), 0.01 (3H, s), 0.00 (3H, s);  $^{13}\text{C}$  NMR ( $\text{CDCl}_3$ , 100 MHz):  $\delta$  168.6, 168.4, 157.3, 138.8, 131.6, 131.3, 130.1, 127.1, 122.2, 120.2, 110.6, 83.0, 62.0, 61.6, 61.4, 55.9, 55.0, 45.6, 35.4, 26.1, 24.9, 24.7, 18.4, 14.2, 14.1, –5.10, –5.15; HRMS (ESI+): Calcd for  $\text{C}_{34}\text{H}_{56}\text{B}_1\text{O}_8\text{Si}_1$   $[\text{M}+\text{H}]^+$ : 631.38375 m/z, Found: 631.38424 m/z.

Enantiomeric purity of **12b** was determined by HPLC analysis in comparison with authentic racemic material (96:4 e.r. shown; Chiralcel OZ–3 column, 99.6:0.4 hexanes/*i*-PrOH, 0.8 mL/min, 220 nm). Specific rotation:  $[\alpha]_{\text{D}}^{20} -6.1$  ( $c$  1.88,  $\text{CHCl}_3$ ).

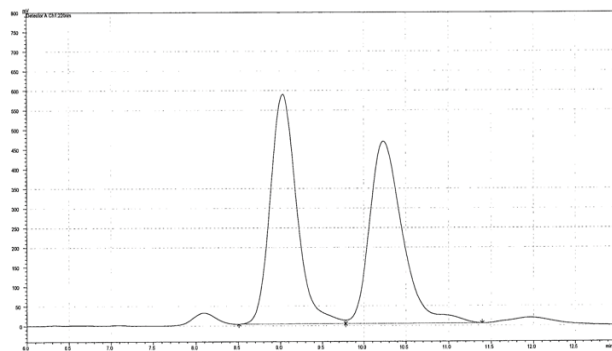

| Peak# | Ret. Time | Area     | Height | Area % | Height % |
|-------|-----------|----------|--------|--------|----------|
| 1     | 9.028     | 12872367 | 585119 | 50.464 | 55.730   |
| 2     | 10.229    | 12635656 | 464801 | 49.536 | 44.270   |

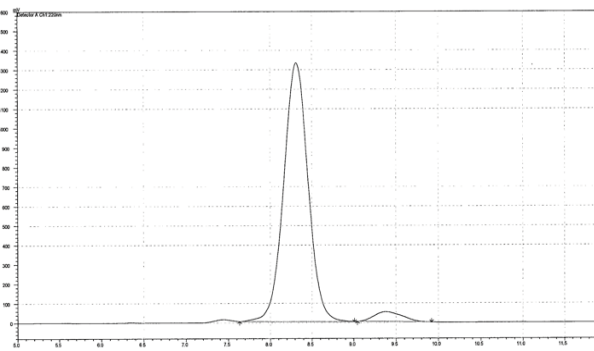

| Peak# | Ret. Time | Area     | Height  | Area % | Height % |
|-------|-----------|----------|---------|--------|----------|
| 1     | 8.311     | 27043857 | 1329289 | 95.993 | 96.382   |
| 2     | 9.375     | 1128780  | 49898   | 4.007  | 3.618    |

| Peak # | Time (min) | Area (%) | Peak # | Time (min) | Area (%) |
|--------|------------|----------|--------|------------|----------|
| 1      | 9.028      | 50.464   | 1      | 8.311      | 95.993   |
| 2      | 10.229     | 49.536   | 2      | 9.375      | 4.007    |

**Diethyl 2-((3*S*,4*S*,*E*)-4-(2-((*tert*-butyldimethylsilyloxy)ethyl)-5-(4,4,5,5-tetramethyl-1,3,2-dioxaborolan-2-yl)-3-(*o*-tolyl)hexa-1,5-dien-1-yl)malonate (**12c**):**

IR (neat): 2978 (m), 2956 (m), 2931 (m), 2857 (m), 1734 (s), 1612 (w), 1463 (m), 1368 (m), 1306 (m), 1216 (m), 1143 (s), 1097 (m), 1033 (m), 969 (m), 836 (m), 776 (m), 728 (m), 702 (w)  $\text{cm}^{-1}$ ;  $^1\text{H}$  NMR ( $\text{CDCl}_3$ , 400 MHz):  $\delta$  7.13–6.97 (4H, m), 5.78 (1H, dd,  $J = 15.2, 9.2$  Hz), 5.72 (1H, d,  $J = 3.2$  Hz), 5.59 (1H, dd,  $J = 15.2, 9.6$  Hz), 5.48 (1H, d,  $J = 3.2$  Hz), 4.20 (2H, q,  $J = 7.2$  Hz), 4.12 (2H, q,  $J = 7.2$  Hz), 3.94 (1H, d,  $J = 8.8$  Hz), 3.83 (1H, app. t,  $J = 10.0$  Hz), 3.59–3.53 (1H, m), 3.49–3.42 (1H, m), 2.77 (1H, td,  $J = 10.4, 2.8$  Hz), 2.30 (3H, s), 2.01–1.93 (1H, m), 1.70–1.61 (1H, m), 1.27 (3H, 7.2 Hz), 1.18 (3H, t,  $J = 7.2$  Hz), 1.18 (6H, s), 1.13 (6H, s), 0.88 (9H, s), 0.01 (6H, s);  $^{13}\text{C}$  NMR ( $\text{CDCl}_3$ , 100 MHz):  $\delta$  168.4, 168.3, 140.9, 139.1, 136.5, 132.2, 130.3, 128.0, 125.8, 125.7, 122.2, 83.2, 61.72, 61.70, 61.5, 55.8, 48.8, 45.8, 35.6, 26.1, 25.1, 24.4, 19.8, 18.4, 14.2, 14.0, –5.12, –5.14; HRMS (ESI+): Calcd for  $\text{C}_{34}\text{H}_{56}\text{B}_1\text{O}_7\text{Si}_1$   $[\text{M}+\text{H}]^+$ : 615.38883 m/z, Found: 615.38940 m/z.

Enantiomeric purity of **12c** was determined by HPLC analysis in comparison with authentic racemic material (94:6 e.r. shown; Chiralcel OZ–3 column, 99.6:0.4 hexanes/*i*-PrOH, 0.8 mL/min, 220 nm). Specific rotation:  $[\alpha]_{\text{D}}^{20} -8.1$  ( $c$  1.26,  $\text{CHCl}_3$ ).

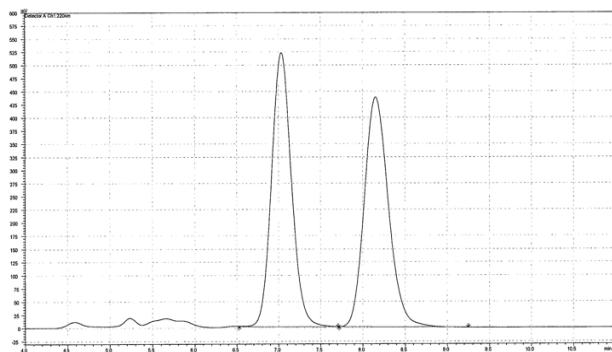

| Peak# | Ret. Time | Area    | Height | Area % | Height % |
|-------|-----------|---------|--------|--------|----------|
| 1     | 7.030     | 8585573 | 521342 | 49.813 | 54.400   |
| 2     | 8.149     | 8649996 | 437011 | 50.187 | 45.600   |

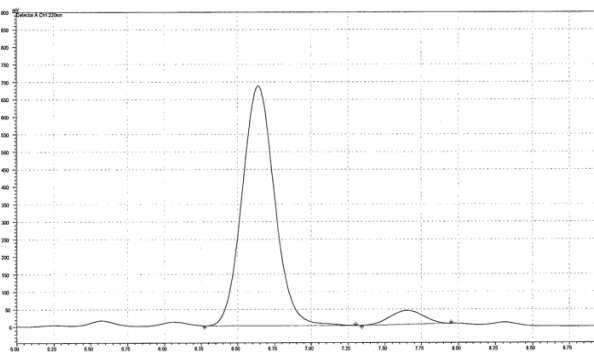

| Peak# | Ret. Time | Area     | Height | Area % | Height % |
|-------|-----------|----------|--------|--------|----------|
| 1     | 6.636     | 10470940 | 685591 | 94.358 | 94.525   |
| 2     | 7.648     | 626092   | 39711  | 5.642  | 5.475    |

| Peak # | Time (min) | Area (%) | Peak # | Time (min) | Area (%) |
|--------|------------|----------|--------|------------|----------|
| 1      | 7.030      | 49.813   | 1      | 6.636      | 94.358   |
| 2      | 8.149      | 50.187   | 2      | 7.648      | 5.642    |

**Diethyl 2-((3*S*,4*S*,*E*)-4-(2-((*tert*-butyldimethylsilyl)oxy)ethyl)-3-(naphthalen-1-yl)-5-(4,4,5,5-tetramethyl-1,3,2-dioxaborolan-2-yl)hexa-1,5-dien-1-yl)malonate (**12d**):**

IR (neat): 2979 (m), 2956 (m), 2857 (m), 1734 (s), 1597 (w), 1471 (m), 1390 (m), 1306 (m), 1255 (m), 1142 (s), 1096 (m), 1033 (m), 968 (m), 836 (m), 778 (s), 703 (w)  $\text{cm}^{-1}$ ;  $^1\text{H}$  NMR ( $\text{CDCl}_3$ , 400 MHz):  $\delta$  8.27 (1H, d,  $J = 8.4$  Hz), 7.77 (1H, d,  $J = 8.0$  Hz), 7.63 (1H, d,  $J = 8.0$  Hz), 7.46–7.32 (4H, m), 5.89–5.87 (2H, m), 5.61 (1H, d,  $J = 3.2$  Hz), 5.42 (1H, d,  $J = 3.2$  Hz), 4.56–4.49 (1H, m), 4.20 (2H, q,  $J = 7.2$  Hz), 4.04 (2H, q,  $J = 7.2$  Hz), 3.97–3.94 (1H, m), 3.61–3.56 (1H, m), 3.49–3.43 (1H, m), 2.98–2.93 (1H, m), 2.08–2.02 (1H, m), 1.84–1.75 (1H, m), 1.27 (3H, t,  $J = 7.2$  Hz), 1.13 (6H, s), 1.06 (3H, t,  $J = 7.2$  Hz), 1.03 (6H, s), 0.88 (9H, s), 0.01 (6H, s);  $^{13}\text{C}$  NMR ( $\text{CDCl}_3$ , 100 MHz):  $\delta$  168.4, 168.2, 139.4, 139.0, 134.1, 132.1, 131.9, 128.8, 126.5, 125.9, 125.42, 125.38, 125.1, 124.3, 122.7, 83.2, 61.7, 61.5, 55.7, 46.9, 34.9, 26.1, 25.0, 24.4, 18.4, 14.2, 13.9, –5.12, –5.15; HRMS (ESI+): Calcd for  $\text{C}_{37}\text{H}_{56}\text{B}_1\text{O}_7\text{Si}_1$   $[\text{M}+\text{H}]^+$ : 651.38883 m/z, Found: 651.38849 m/z.

Enantiomeric purity of **12d** was determined by HPLC analysis in comparison with authentic racemic material (95:5 e.r. shown; Chiralcel OZ–3 column, 99.6:0.4 hexanes/*i*-PrOH, 0.5 mL/min, 220 nm). Specific rotation:  $[\alpha]_{\text{D}}^{20} +9.6$  (c 1.81,  $\text{CHCl}_3$ ).

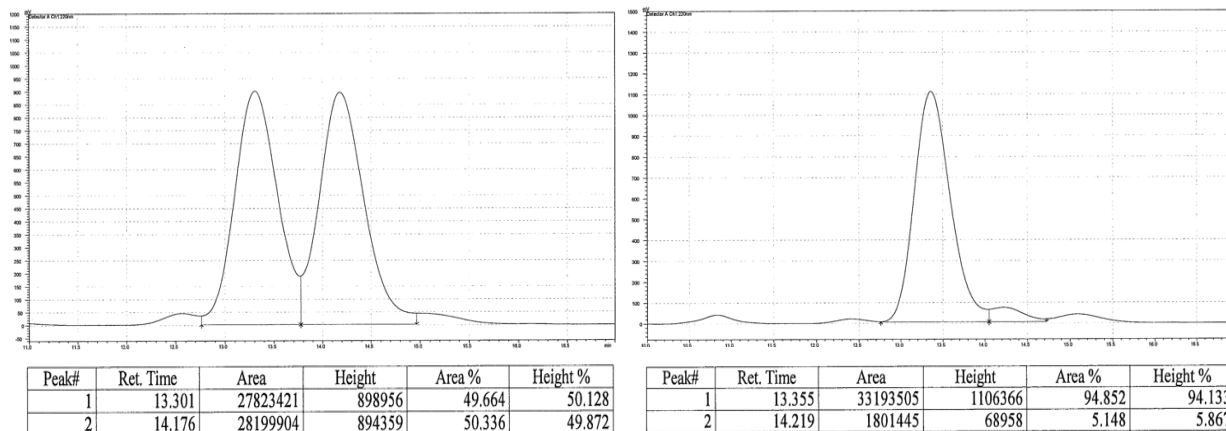

| Peak # | Time (min) | Area (%) | Peak # | Time (min) | Area (%) |
|--------|------------|----------|--------|------------|----------|
| 1      | 13.301     | 49.664   | 1      | 13.355     | 94.852   |
| 2      | 14.176     | 50.336   | 2      | 14.219     | 5.148    |

**Diethyl 2-((3*S*,4*S*,*E*)-3-(4-bromophenyl)-4-(2-((*tert*-butyldimethylsilyl)oxy)ethyl)-5-(4,4,5,5-tetramethyl-1,3,2-dioxaborolan-2-yl)hexa-1,5-dien-1-yl)malonate (**12e**):**

IR (neat): 2979 (m), 2956 (m), 2931 (m), 2857 (m), 1733 (s), 1610 (w), 1471 (m), 1368 (m), 1306 (m), 1252 (m), 1142 (s), 1096 (s), 1033 (m), 968 (m), 835 (s), 776 (m), 700 (w)  $\text{cm}^{-1}$ ;  $^1\text{H}$  NMR ( $\text{CDCl}_3$ , 400 MHz):  $\delta$  7.31 (2H, d,  $J = 8.4$  Hz), 6.95 (2H, d,  $J = 8.4$  Hz), 5.82–5.70 (2H, m), 5.65 (1H, d,  $J = 3.6$  Hz), 5.33 (1H, d,  $J = 3.6$  Hz), 4.20 (2H, q,  $J = 7.2$  Hz), 4.13 (2H, q,  $J = 7.2$  Hz), 3.97 (1H, d,  $J = 8.0$  Hz), 3.60–3.49 (2H, m), 3.43–3.37 (1H, m), 2.56 (1H, td,  $J = 11.2, 3.2$  Hz), 1.94–1.86 (1H, m), 1.67–1.58 (1H, m), 1.27 (3H, t,  $J = 7.2$  Hz), 1.22 (6H, s), 1.19 (3H, t,  $J = 7.2$  Hz), 1.18 (6H, s), 0.87 (9H, s),

0.00 (3H, s), -0.01 (3H, s);  $^{13}\text{C}$  NMR ( $\text{CDCl}_3$ , 100 MHz):  $\delta$  168.3, 168.2, 142.8, 139.0, 132.6, 131.3, 130.2, 122.8, 119.7, 83.3, 61.8, 61.7, 61.6, 55.7, 52.9, 48.0, 34.9, 26.1, 24.9, 24.8, 18.4, 14.2, 14.1, -5.1, -5.2; HRMS (ESI+): Calcd for  $\text{C}_{33}\text{H}_{53}\text{B}_1\text{Br}_1\text{O}_7\text{Si}_1$   $[\text{M}+\text{H}]^+$ : 679.28370 m/z, Found: 679.28266 m/z.

Enantiomeric purity of **12e** was determined by HPLC analysis in comparison with authentic racemic material (93:7 e.r. shown; Chiralcel OZ-H column, 99.5:0.5 hexanes/*i*-PrOH, 0.8 mL/min, 220 nm). Specific rotation:  $[\alpha]_{\text{D}}^{20}$  -5.6 (*c* 1.98,  $\text{CHCl}_3$ ).

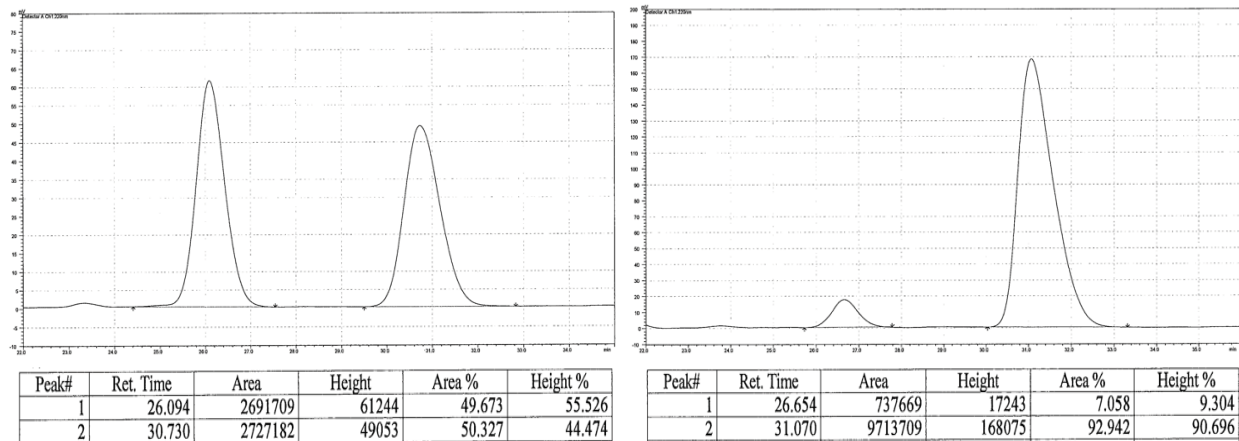

| Peak # | Time (min) | Area (%) | Peak # | Time (min) | Area (%) |
|--------|------------|----------|--------|------------|----------|
| 1      | 26.094     | 49.673   | 1      | 26.654     | 7.058    |
| 2      | 30.730     | 50.327   | 2      | 31.070     | 92.942   |

**Diethyl 2-((3*S*,4*S*,*E*)-4-(2-((*tert*-butyldimethylsilyl)oxy)ethyl)-3-(4-methoxyphenyl)-5-(4,4,5,5-tetramethyl-1,3,2-dioxaborolan-2-yl)hexa-1,5-dien-1-yl)malonate (**12f**):**

IR (neat): 2978 (m), 2955 (m), 2931 (m), 2857 (m), 1734 (s), 1610 (w), 1511 (m), 1417 (m), 1367 (m), 1303 (m), 1247 (s), 1141 (s), 1094 (s), 1034 (s), 968 (m), 833 (s), 775 (s), 700 (m)  $\text{cm}^{-1}$ ;  $^1\text{H}$  NMR ( $\text{CDCl}_3$ , 400 MHz):  $\delta$  6.99 (2H, d,  $J = 8.4$  Hz), 6.74 (2H, d,  $J = 8.4$  Hz), 5.77–5.75 (2H, m), 5.64 (1H, d,  $J = 3.6$  Hz), 5.33 (1H, d,  $J = 3.6$  Hz), 4.20 (2H, q,  $J = 7.6$  Hz), 4.13 (2H, q,  $J = 7.6$  Hz), 3.98–3.96 (1H, m), 3.74 (3H, s), 3.58–3.49 (2H, m), 3.41 (1H, dt,  $J = 10.0, 7.6$  Hz), 2.56 (1H, td,  $J = 11.2, 2.8$  Hz), 1.96–1.87 (1H, m), 1.69–1.62 (1H, m), 1.27 (3H, t,  $J = 7.2$  Hz), 1.23 (6H, s), 1.19 (3H, t,  $J = 7.2$  Hz), 1.19 (6H, s), 0.88 (9H, s), 0.00 (3H, s), -0.01 (3H, s);  $^{13}\text{C}$  NMR ( $\text{CDCl}_3$ , 100 MHz):  $\delta$  168.5, 168.4, 157.7, 139.9, 135.8, 132.1, 129.3, 122.0, 113.7, 83.2, 61.8, 61.7, 61.6, 55.8, 55.2, 52.6, 48.2, 35.0, 26.1, 25.0, 24.8, 18.4, 14.2, 14.1, -5.12, -5.15; HRMS (ESI+): Calcd for  $\text{C}_{34}\text{H}_{56}\text{B}_1\text{O}_8\text{Si}_1$   $[\text{M}+\text{H}]^+$ : 631.38375 m/z, Found: 631.38476 m/z.

Enantiomeric purity of **12f** was determined by HPLC analysis in comparison with authentic racemic material (94:6 e.r. shown; Chiralcel OZ-H column, 99.6:0.4 hexanes/*i*-PrOH, 0.8 mL/min, 220 nm). Specific rotation:  $[\alpha]_{\text{D}}^{20}$  -11.0 (*c* 1.91,  $\text{CHCl}_3$ ).

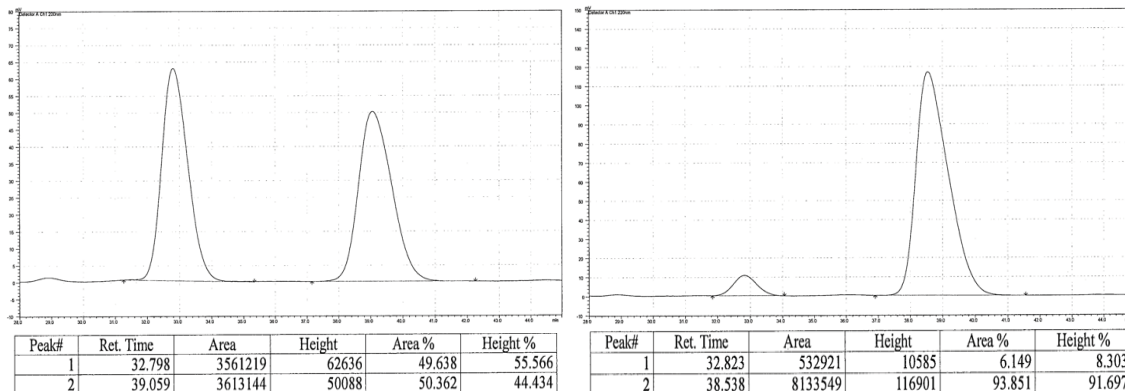

| Peak # | Time (min) | Area (%) | Peak # | Time (min) | Area (%) |
|--------|------------|----------|--------|------------|----------|
| 1      | 26.094     | 49.673   | 1      | 26.654     | 7.058    |
| 2      | 30.730     | 50.327   | 2      | 31.070     | 92.942   |

**Diethyl 2-((3*S*,4*S*,*E*)-4-(2-((*tert*-butyldimethylsilyloxy)ethyl)-3-(furan-3-yl)-5-(4,4,5,5-tetramethyl-1,3,2-dioxaborolan-2-yl)hexa-1,5-dien-1-yl)malonate (**12g**):**

IR (neat): 2978 (m), 2955 (m), 2930 (m), 2857 (m), 1734 (s), 1610 (w), 1471 (m), 1368 (m), 1305 (m), 1253 (m), 1216 (m), 1141 (s), 1095 (s), 1034 (m), 968 (m), 834 (s), 775 (s), 701 (m)  $\text{cm}^{-1}$ ;  $^1\text{H}$  NMR ( $\text{CDCl}_3$ , 400 MHz):  $\delta$  7.16–7.14 (1H, m), 6.87–6.85 (2H, m), 5.77–5.74 (2H, m), 5.69 (1H, d,  $J = 3.6$  Hz), 5.37 (1H, d,  $J = 3.6$  Hz), 4.20 (2H, q,  $J = 7.2$  Hz), 4.15 (2H, q,  $J = 7.2$  Hz), 4.00–3.98 (1H, m), 3.76–3.72 (1H, m), 3.55–3.49 (1H, m), 3.43–3.38 (1H, m), 2.57 (1H, td,  $J = 11.2, 3.2$  Hz), 1.91–1.83 (1H, m), 1.65–1.57 (1H, m), 1.27 (3H, t,  $J = 7.2$  Hz), 1.23 (6H, s), 1.21 (3H, t,  $J = 7.2$  Hz), 1.20 (6H, s), 0.87 (9H, s),  $-0.007$  (3H, s),  $-0.009$  (3H, s);  $^{13}\text{C}$  NMR ( $\text{CDCl}_3$ , 100 MHz):  $\delta$  168.4, 168.3, 144.1, 138.6, 131.6, 127.5, 125.0, 122.5, 120.7, 83.2, 61.72, 61.67, 61.63, 55.7, 48.7, 47.8, 34.6, 26.1, 25.0, 24.8, 18.4, 14.2, 14.1,  $-5.1$ ,  $-5.2$ ; HRMS (ESI<sup>+</sup>): Calcd for  $\text{C}_{31}\text{H}_{52}\text{B}_1\text{O}_8\text{Si}_1$   $[\text{M}+\text{H}]^+$ : 591.35245  $m/z$ , Found: 591.35110  $m/z$ .

Enantiomeric purity of **12g** was determined by HPLC analysis in comparison with authentic racemic material (96:4 e.r. shown; Chiralcel OZ–H column, 99.5:0.5 hexanes/*i*-PrOH, 0.8 mL/min, 220 nm). Specific rotation:  $[\alpha]_{\text{D}}^{20} -15.3$  ( $c$  2.65,  $\text{CHCl}_3$ ).

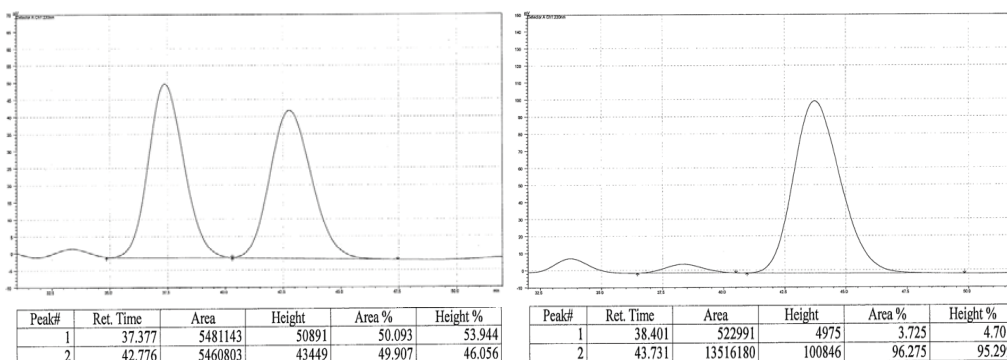

| Peak # | Time (min) | Area (%) | Peak # | Time (min) | Area (%) |
|--------|------------|----------|--------|------------|----------|
| 1      | 37.377     | 50.093   | 1      | 38.401     | 3.725    |
| 2      | 42.776     | 49.907   | 2      | 43.731     | 96.275   |

**Diethyl 2-((3*S*,4*S*,*E*)-4-(2-((*tert*-butyldimethylsilyl)oxy)ethyl)-5-(4,4,5,5-tetramethyl-1,3,2-dioxaborolan-2-yl)-3-(thiophen-3-yl)hexa-1,5-dien-1-yl)malonate (12h):**

IR (neat): 2979 (m), 2955 (m), 2931 (m), 2857 (m), 1735 (s), 1610 (w), 1471 (m), 1369 (m), 1307 (m), 1254 (m), 1215 (m), 1143 (s), 1096 (m), 1028 (m), 969 (m), 836 (m), 777 (m), 701 (w)  $\text{cm}^{-1}$ ;  $^1\text{H}$  NMR ( $\text{CDCl}_3$ , 400 MHz):  $\delta$  7.26 (1H, s), 7.11 (1H, s), 6.20 (1H, s), 5.79–5.66 (3H, m), 5.42 (1H, d,  $J = 3.2$  Hz), 4.21 (2H, q,  $J = 7.2$  Hz), 4.17 (2H, q,  $J = 7.2$  Hz), 3.99 (1H, d,  $J = 8.0$  Hz), 3.55 (2H, m), 3.43–3.35 (1H, m), 2.47 (1H, td,  $J = 11.2, 2.8$  Hz), 1.89–1.81 (1H, m), 1.66–1.57 (1H, m), 1.27 (3H, t,  $J = 7.2$  Hz), 1.23 (3H, t,  $J = 7.2$  Hz), 1.22 (6H, s), 1.21 (6H, s), 0.87 (9H, s),  $-0.01$  (6H, s);  $^{13}\text{C}$  NMR ( $\text{CDCl}_3$ , 100 MHz):  $\delta$  168.41, 168.36, 142.5, 139.2, 138.4, 131.6, 127.0, 110.3, 83.3, 61.73, 61.68, 55.7, 47.2, 43.6, 34.4, 26.1, 24.9, 24.8, 18.4, 14.2, 14.1,  $-5.1$ ,  $-5.2$ ; HRMS (ESI<sup>+</sup>): Calcd for  $\text{C}_{31}\text{H}_{52}\text{B}_1\text{O}_7\text{S}_1\text{Si}_1$   $[\text{M}+\text{H}]^+$ : 607.32960  $m/z$ , Found: 607.33019  $m/z$ .

Enantiomeric purity of **12h** was determined by HPLC analysis in comparison with authentic racemic material (95:5 e.r. shown; Chiralcel OZ–H column, 99.7:0.3 hexanes/*i*-PrOH, 0.8 mL/min, 220 nm). Specific rotation:  $[\alpha]_{\text{D}}^{20} -6.2$  ( $c$  2.01,  $\text{CHCl}_3$ ).

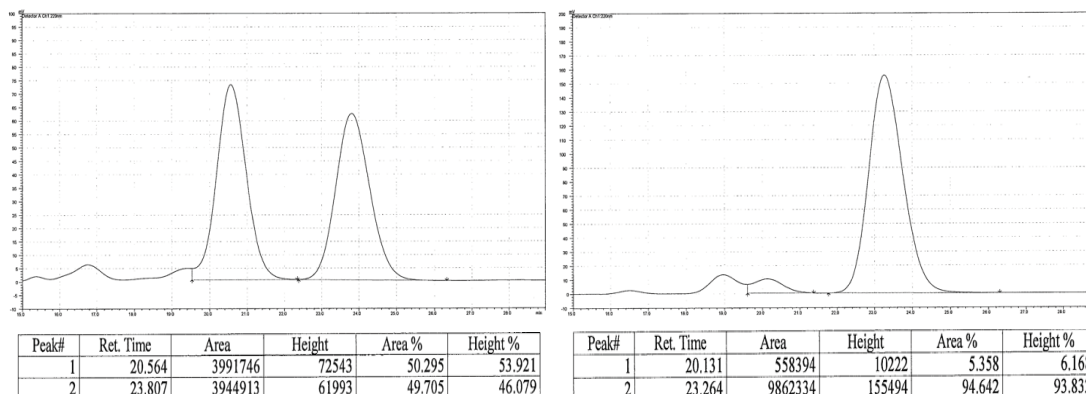

| Peak # | Time (min) | Area (%) | Peak # | Time (min) | Area (%) |
|--------|------------|----------|--------|------------|----------|
| 1      | 20.564     | 50.295   | 1      | 20.131     | 5.358    |
| 2      | 23.807     | 49.705   | 2      | 23.264     | 94.642   |

**Diethyl 2-((3*S*,4*S*,*E*)-4-(2-((*tert*-butyldimethylsilyl)oxy)ethyl)-3-phenethyl-5-(4,4,5,5-tetramethyl-1,3,2-dioxaborolan-2-yl)hexa-1,5-dien-1-yl)malonate (12i):**

IR (neat): 2978 (m), 2955 (m), 2930 (m), 2857 (m), 1735 (s), 1606 (w), 1496 (m), 1369 (m), 1306 (m), 1253 (m), 1142 (s), 1195 (s), 1033 (m), 970 (m), 835 (s), 775 (m), 700 (m)  $\text{cm}^{-1}$ ;  $^1\text{H}$  NMR ( $\text{CDCl}_3$ , 400 MHz):  $\delta$  7.24–7.22 (2H, m), 7.15–7.09 (3H, m), 5.84 (1H, d,  $J = 3.6$  Hz), 5.73 (1H, dd,  $J = 15.6, 9.2$  Hz), 5.51 (1H, d,  $J = 3.6$  Hz), 5.41 (1H, dd,  $J = 15.6, 9.6$  Hz), 4.22 (4H, q,  $J = 7.2$  Hz), 4.06 (1H, d,  $J = 9.2$  Hz), 3.51–3.44 (1H, m), 3.40–3.33 (1H, m), 2.66–2.56 (1H, m), 2.43–2.33 (1H, m), 2.32–2.25 (1H, m), 2.10 (1H, td,  $J = 11.2, 3.2$  Hz), 1.76–1.67 (2H, m), 1.61–1.52 (1H, m), 1.36–1.30 (1H, m), 1.29 (3H, t,  $J = 7.2$  Hz), 1.28 (3H, t,  $J = 7.2$  Hz), 1.20 (6H, s), 1.18 (6H, s), 0.86 (9H, s),  $-0.01$  (6H, s);  $^{13}\text{C}$  NMR ( $\text{CDCl}_3$ , 100 MHz):  $\delta$  168.64, 168.55, 143.0, 140.2, 131.4, 128.6, 128.3, 125.6, 123.4, 83.2, 61.9, 61.71, 61.68, 56.0, 47.8, 46.1, 35.2, 34.8, 33.6, 26.1, 24.83, 24.76, 18.4, 14.2,  $-5.10$ ,  $-5.14$ ; HRMS (ESI<sup>+</sup>): Calcd for  $\text{C}_{35}\text{H}_{58}\text{B}_1\text{O}_7\text{Si}_1$   $[\text{M}+\text{H}]^+$ : 629.40448  $m/z$ , Found: 629.40555  $m/z$ .

Enantiomeric purity of **12i** was determined by HPLC analysis in comparison with authentic racemic material (93:7 e.r. shown; Chiralcel OZ–3 column, 99.6:0.4 hexanes/*i*-PrOH, 0.5 mL/min, 220 nm). Specific rotation:  $[\alpha]_D^{20} +1.2$  (*c* 2.14, CHCl<sub>3</sub>).

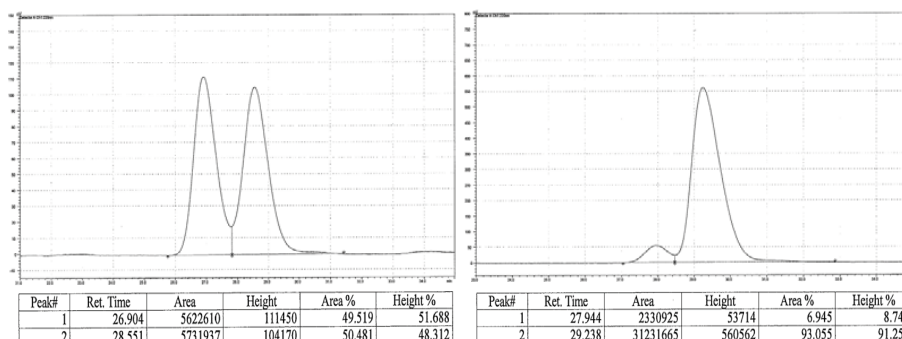

| Peak # | Time (min) | Area (%) | Peak # | Time (min) | Area (%) |
|--------|------------|----------|--------|------------|----------|
| 1      | 26.904     | 49.519   | 1      | 27.944     | 6.945    |
| 2      | 28.551     | 50.481   | 2      | 29.238     | 93.055   |

**Diethyl 2-((1*E*,3*S*,4*S*,6*E*)-3,7-diphenyl-4-(1-(4,4,5,5-tetramethyl-1,3,2-dioxaborolan-2-yl)vinyl)hepta-1,6-dien-1-yl)malonate (**12j**):**

IR (neat): 3026 (m), 2978 (m), 2934 (m), 1733 (s), 1600 (w), 1447 (m), 1369 (m), 1305 (m), 1141 (s), 1031 (m), 966 (m), 858 (m), 743 (m), 699 (m) cm<sup>-1</sup>; <sup>1</sup>H NMR (CDCl<sub>3</sub>, 400 MHz): δ 7.32–7.27 (3H, m), 7.24–7.14 (4H, m), 7.13–7.09 (3H, m), 6.31 (1H, d, *J* = 16.0 Hz), 6.10 (1H, dt, *J* = 16.0, 7.6 Hz), 5.88–5.86 (2H, m), 5.69 (1H, d, *J* = 3.6 Hz), 5.36 (1H, d, *J* = 3.6 Hz), 4.23 (2H, q, *J* = 7.2 Hz), 4.16 (2H, q, *J* = 7.2 Hz), 4.04–4.02 (1H, m), 3.71–3.66 (1H, m), 2.74–2.60 (2H, m), 2.48–2.40 (1H, m), 1.29 (3H, t, *J* = 7.2 Hz), 1.22 (6H, s), 1.21 (3H, t, *J* = 7.2 Hz), 1.20 (6H, s); <sup>13</sup>C NMR (CDCl<sub>3</sub>, 100 MHz): δ 168.5, 168.3, 143.3, 139.6, 138.1, 132.4, 130.7, 130.0, 128.5, 128.4, 128.3, 126.8, 126.1, 122.4, 83.2, 61.8, 61.6, 55.7, 53.4, 51.3, 36.3, 25.0, 24.7, 14.2, 14.1; HRMS (ESI<sup>+</sup>): Calcd for C<sub>34</sub>H<sub>44</sub>B<sub>1</sub>O<sub>6</sub> [M+H]<sup>+</sup>: 559.32309 m/z, Found: 559.32510 m/z.

Enantiomeric purity of **12j** was determined by HPLC analysis in comparison with authentic racemic material (95:5 e.r. shown; Chiralcel OD–H column, 99:1 hexanes/*i*-PrOH, 0.5 mL/min, 220 nm). Specific rotation:  $[\alpha]_D^{20} -18.0$  (*c* 3.34, CHCl<sub>3</sub>).

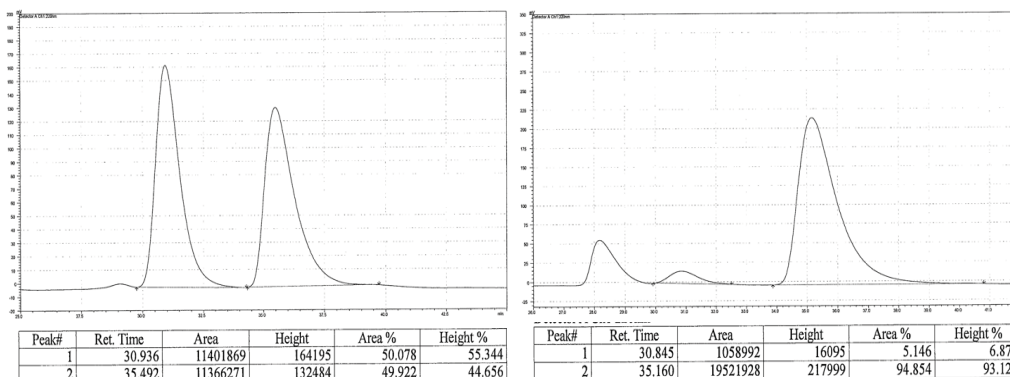

| Peak # | Time (min) | Area (%) | Peak # | Time (min) | Area (%) |
|--------|------------|----------|--------|------------|----------|
| 1      | 30.936     | 50.078   | 1      | 30.845     | 5.146    |

|   |        |        |   |        |        |
|---|--------|--------|---|--------|--------|
| 2 | 35.492 | 49.922 | 2 | 35.160 | 94.854 |
|---|--------|--------|---|--------|--------|

**Diethyl 2-((3*S*,4*S*,*E*)-4-acetyl-8-(*tert*-butyldimethylsilyl)-3-phenyloct-1-en-7-yn-1-yl)malonate (12k):**

IR (neat): 2954 (m), 2930 (m), 2856 (m), 2173 (m), 1733 (s), 1713 (s), 1463 (m), 1363 (m), 1250 (s), 1152 (s), 1032 (s), 970 (m), 837 (s), 775 (s), 701 (s), 680 (m)  $\text{cm}^{-1}$ ;  $^1\text{H}$  NMR ( $\text{CDCl}_3$ , 400 MHz):  $\delta$  7.30–7.26 (2H, m), 7.21–7.14 (3H, s), 5.86–5.76 (2H, m), 4.21 (2H, q,  $J = 7.2$  Hz), 4.15 (2H, q,  $J = 7.2$  Hz), 4.00–3.98 (1H, m), 3.50–3.45 (1H, m), 3.26–3.20 (1H, m), 2.30–2.23 (1H, m), 2.15–2.06 (1H, m), 1.83–1.79 (1H, m), 1.78 (3H, s), 1.27 (3H, t,  $J = 7.2$  Hz), 1.21 (3H, t,  $J = 7.2$  Hz), 0.95 (9H, s), 0.095 (3H, s), 0.091 (3H, s);  $^{13}\text{C}$  NMR ( $\text{CDCl}_3$ , 100 MHz):  $\delta$  211.9, 168.1, 167.9, 141.5, 136.4, 128.9, 127.9, 127.1, 124.0, 106.6, 84.1, 61.9, 61.8, 56.0, 55.6, 51.9, 32.4, 29.2, 26.2, 18.1, 16.7, 14.2, 14.1, –4.3; HRMS (ESI<sup>+</sup>): Calcd for  $\text{C}_{29}\text{H}_{43}\text{O}_5\text{Si}_1$   $[\text{M}+\text{H}]^+$ : 499.28797 m/z, Found: 499.28813 m/z.

Enantiomeric purity of **12k** was determined by HPLC analysis in comparison with authentic racemic material (88:12 e.r. shown; Chiralcel OZ–3 column, 99:1 hexanes/*i*-PrOH, 0.8 mL/min, 220 nm). Specific rotation:  $[\alpha]_{\text{D}}^{20} -19.8$  ( $c$  0.50,  $\text{CHCl}_3$ ).

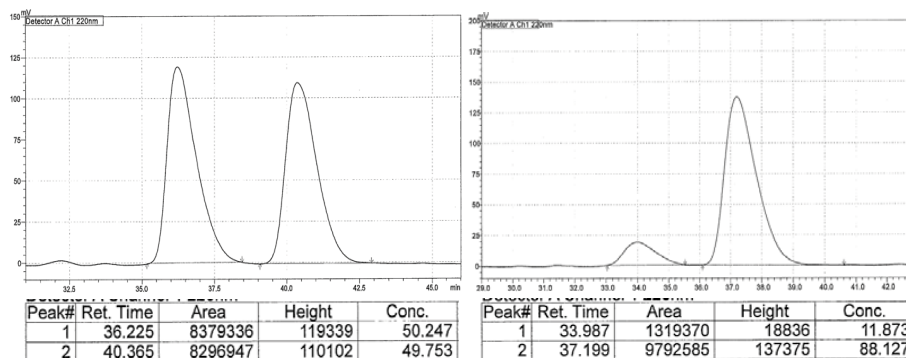

| Peak # | Time (min) | Area (%) | Peak # | Time (min) | Area (%) |
|--------|------------|----------|--------|------------|----------|
| 1      | 36.225     | 50.247   | 1      | 33.987     | 11.873   |
| 2      | 40.365     | 49.753   | 2      | 37.199     | 88.127   |

**Diethyl 2-((3*S*,4*S*,*E*)-7-(methoxy(methyl)amino)-7-oxo-3-phenyl-4-(1-(4,4,5,5-tetramethyl-1,3,2-dioxaborolan-2-yl)vinyl)hept-1-en-1-yl)malonate (12l):**

IR (neat): 2978 (m), 2937 (m), 1732 (s), 1664 (s), 1445 (m), 1368 (s), 1305 (s), 1273 (m), 1140 (s), 1030 (s), 967 (s), 861 (m), 765 (m), 700 (s)  $\text{cm}^{-1}$ ;  $^1\text{H}$  NMR ( $\text{CDCl}_3$ , 400 MHz):  $\delta$  7.19–7.15 (2H, m), 7.09–7.05 (3H, m), 5.85 (1H, dd,  $J = 15.6, 8.4$  Hz), 5.78 (1H, dd,  $J = 15.6, 8.4$  Hz), 5.66 (1H, d,  $J = 3.6$  Hz), 5.34 (1H, d,  $J = 3.6$  Hz), 4.19 (2H, q,  $J = 7.2$  Hz), 4.11 (2H, q,  $J = 7.2$  Hz), 3.98 (1H, d,  $J = 7.6$  Hz), 3.65–3.60 (1H, m), 3.61 (3H, s), 3.12 (3H, s), 2.54 (1H, dt,  $J = 10.8, 2.8$  Hz), 2.37–2.29 (1H, m), 2.27–2.19 (1H, m), 2.09–2.01 (1H, m), 1.78–1.69 (1H, m), 1.25 (3H, t,  $J = 7.2$  Hz), 1.22 (6H, s), 1.18 (6H, s), 1.16 (3H, t,  $J = 7.2$  Hz);  $^{13}\text{C}$  NMR ( $\text{CDCl}_3$ , 100 MHz):  $\delta$  168.4, 168.3, 143.7, 139.4, 132.4, 128.5, 128.2, 125.9, 122.4, 83.2, 61.7, 61.5, 61.2, 55.6, 53.5, 51.1, 26.9, 25.0, 24.7, 14.1, 14.0; HRMS (ESI<sup>+</sup>): Calcd for  $\text{C}_{30}\text{H}_{45}\text{B}_1\text{N}_1\text{O}_8$   $[\text{M}+\text{H}]^+$ : 558.32382 m/z, Found: 558.32521 m/z.



Enantiomeric purity of **12l** was determined by HPLC analysis in comparison with authentic racemic material (93:7 e.r. shown; Chiralcel OZ–3 column, 95:5 hexanes/*i*-PrOH, 0.5 mL/min, 220 nm). Specific rotation:  $[\alpha]_D^{20} -14.8$  (*c* 2.14, CHCl<sub>3</sub>).

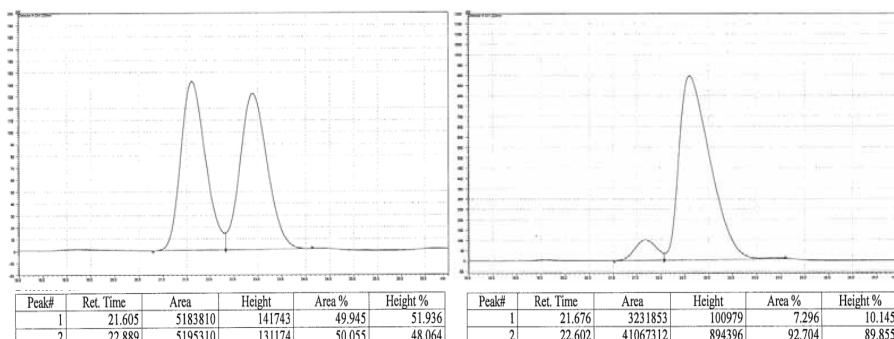

| Peak # | Time (min) | Area (%) | Peak # | Time (min) | Area (%) |
|--------|------------|----------|--------|------------|----------|
| 1      | 21.605     | 49.945   | 1      | 21.676     | 7.296    |
| 2      | 22.889     | 50.055   | 2      | 22.602     | 92.704   |

**(*R,E*)-Diethyl 2-(3-phenyl-5-(4,4,5,5-tetramethyl-1,3,2-dioxaborolan-2-yl)hexa-1,5-dien-1-yl)malonate (12m):**

IR (neat): 2979 (m), 2934 (w), 1732 (s), 1616 (w), 1446 (m), 1367 (m), 1307 (m), 1211 (m), 1138 (s), 1030 (m), 969 (m), 862 (m), 758 (m), 699 (m) cm<sup>-1</sup>; <sup>1</sup>H NMR (CDCl<sub>3</sub>, 600 MHz): δ 7.27–7.25 (2H, m), 7.18–7.15 (3H, m), 5.84 (1H, dd, *J* = 15.6, 7.2 Hz), 5.76 (1H, d, *J* = 3.6 Hz), 5.69 (1H, dd, *J* = 15.6, 7.2 Hz), 5.49 (1H, d, *J* = 3.6 Hz), 4.19 (2H, q, *J* = 7.2 Hz), 4.16 (2H, q, *J* = 7.2 Hz), 3.97 (1H, d, *J* = 9.0 Hz), 3.65 (1H, dt, *J* = 7.2, 7.2 Hz), 2.62–2.56 (2H, m), 1.27 (3H, t, *J* = 7.2 Hz), 1.24 (12H, s), 1.23 (3H, t, *J* = 7.2 Hz); <sup>13</sup>C NMR (CDCl<sub>3</sub>, 150 MHz): δ 168.37, 168.36, 143.7, 139.9, 131.7, 128.4, 128.1, 126.2, 121.5, 83.4, 61.62, 61.57, 55.8, 47.9, 41.5, 24.9, 14.13, 14.08; HRMS (ESI<sup>+</sup>): Calcd for C<sub>25</sub>H<sub>36</sub>B<sub>1</sub>O<sub>6</sub> [M+H]<sup>+</sup>: 443.26049 m/z, Found: 443.26111 m/z.

Enantiomeric purity of **12m** was determined by HPLC analysis in comparison with authentic racemic material (91:9 e.r. shown; Chiralcel OZ–H column, 99.5:0.5 hexanes/*i*-PrOH, 0.8 mL/min, 220 nm). Specific rotation:  $[\alpha]_D^{20} +5.9$  (*c* 1.29, CHCl<sub>3</sub>).

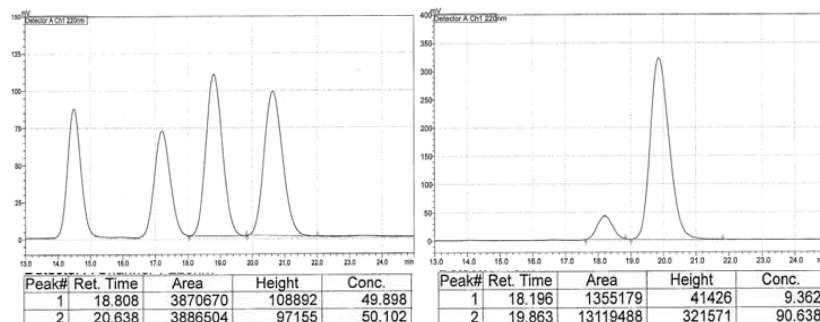

| Peak # | Time (min) | Area (%) | Peak # | Time (min) | Area (%) |
|--------|------------|----------|--------|------------|----------|
| 1      | 18.808     | 49.898   | 1      | 18.196     | 9.362    |
| 2      | 20.638     | 50.102   | 2      | 19.863     | 90.638   |

### Determination of Stereochemical Identity

The absolute stereochemistry was determined by comparison of the ketone **S13** formed from oxidation of alkenylboron **12m** with  $\text{NaBO}_3 \cdot 4\text{H}_2\text{O}$  and hydration of alkyne **7a** in the presence of  $\text{Hg}(\text{OAc})_2$  and PPTS<sup>8</sup> and assigned as *R* enantiomer.

#### (*R,E*)-Diethyl 2-(5-oxo-3-phenylhex-1-en-1-yl)malonate (**S13**):

IR (neat): 2982 (m), 2936 (m), 1730 (s), 1602 (w), 1419 (m), 1367 (m), 1154 (s), 1030 (s), 971 (m), 861 (m), 756 (m), 701 (m)  $\text{cm}^{-1}$ ;  $^1\text{H}$  NMR ( $\text{CDCl}_3$ , 400 MHz):  $\delta$  7.31–7.26 (2H, m), 7.22–7.17 (3H, m), 5.84 (1H, dd,  $J = 15.6, 6.8$  Hz), 5.71 (1H, dd,  $J = 15.6, 8.8$  Hz), 4.19 (2H, q,  $J = 6.8$  Hz), 4.17 (2H, q,  $J = 6.8$  Hz), 3.97 (1H, d,  $J = 8.8$  Hz), 3.96 (1H, td,  $J = 7.2, 6.8$  Hz), 2.89 (1H, dd,  $J = 16.0, 7.2$  Hz), 2.83 (1H, dd,  $J = 16.0, 7.2$  Hz), 2.07 (3H, s), 1.26 (3H, t,  $J = 7.2$  Hz), 1.23 (3H, t,  $J = 7.2$  Hz);  $^{13}\text{C}$  NMR ( $\text{CDCl}_3$ , 100 MHz):  $\delta$  206.7, 168.2, 168.1, 142.4, 138.3, 128.8, 127.8, 126.9, 122.0, 61.80, 61.75, 55.6, 49.1, 43.4, 30.8, 14.14, 14.11; HRMS (ESI+): Calcd for  $\text{C}_{19}\text{H}_{25}\text{O}_5$   $[\text{M}+\text{H}]^+$ : 333.17020  $m/z$ , Found: 333.17047  $m/z$ .

Enantiomeric purity of **S13** generated from oxidation of **12m** was determined by HPLC analysis in comparison with authentic racemic material (90:10 e.r. shown; Chiralcel OZ–H column, 95:5 hexanes/*i*-PrOH, 0.8 mL/min, 220 nm). Specific rotation:  $[\alpha]_D^{20} +14.9$  ( $c$  1.28,  $\text{CHCl}_3$ ).

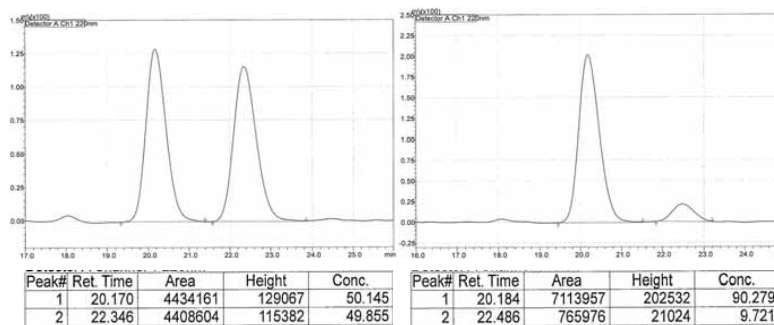

| Peak # | Time (min) | Area (%) | Peak # | Time (min) | Area (%) |
|--------|------------|----------|--------|------------|----------|
| 1      | 20.170     | 50.145   | 1      | 20.184     | 90.279   |
| 2      | 22.346     | 49.855   | 2      | 22.486     | 9.729    |

Enantiomeric purity of **S13** generated from hydration of **7m** with  $\text{Hg}(\text{OAc})_2$  and PPTS was determined by HPLC analysis in comparison with authentic racemic material (97:3 e.r. shown; Chiralcel OZ–H column, 95:5 hexanes/*i*-PrOH, 0.8 mL/min, 220 nm).

(8) Guérinot, A., Lepesqueux, G., Sablé, S., Reymond, S. & Cossy, J. *J. Org. Chem.* **75**, 5151–5163 (2010).

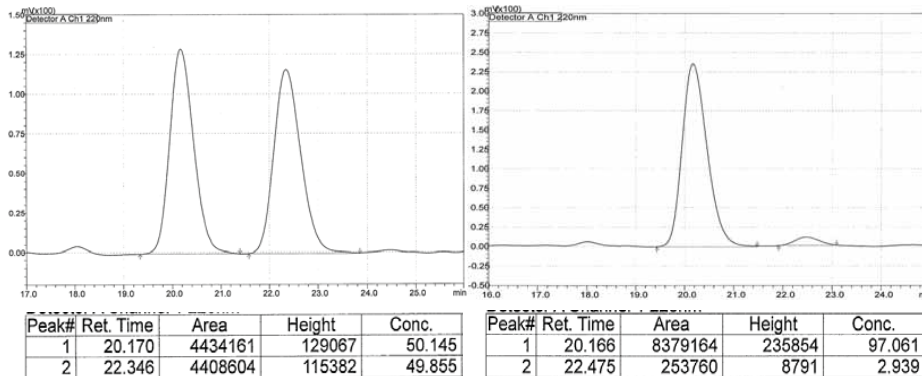

| Peak # | Time (min) | Area (%) | Peak # | Time (min) | Area (%) |
|--------|------------|----------|--------|------------|----------|
| 1      | 20.170     | 50.145   | 1      | 20.166     | 97.061   |
| 2      | 22.346     | 49.855   | 2      | 22.475     | 2.939    |

The relative stereochemistry as illustrated below.

**Scheme S3:** Determination of Relative Stereochemistry of Products of Catalytic Multicomponent Reactions

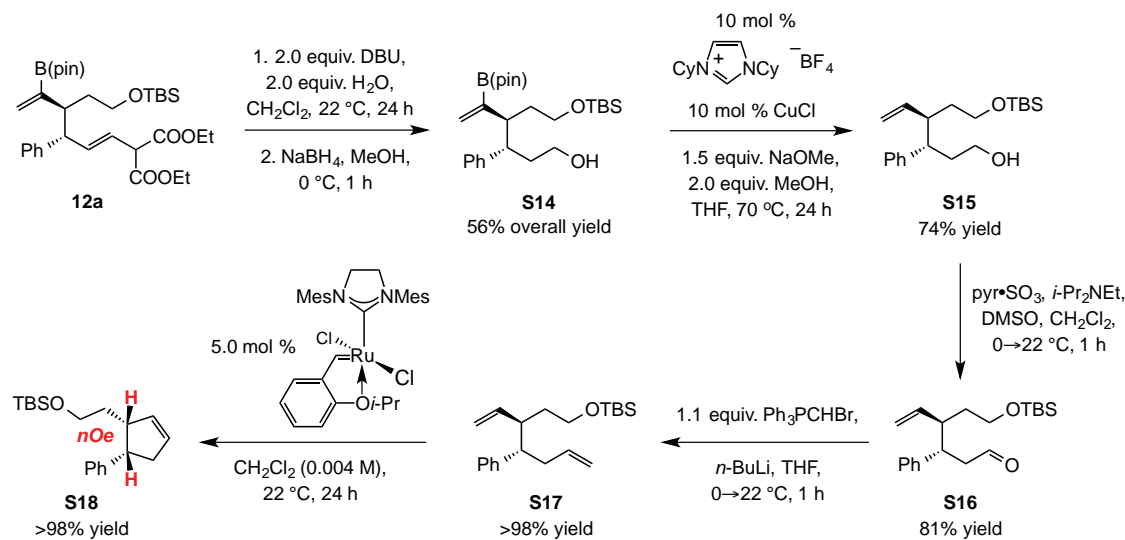

**(3*S*,4*S*)-4-(2-((*tert*-Butyldimethylsilyl)oxy)ethyl)-3-phenyl-5-(4,4,5,5-tetramethyl-1,3,2-dioxaborolan-2-yl)hex-5-en-1-ol (S14):**

To a solution of **12a** (1.41 g, 2.35 mmol) in  $\text{CH}_2\text{Cl}_2$  (10 mL) is added DBU (703  $\mu\text{L}$ , 4.70 mmol) and water (85  $\mu\text{L}$ , 4.70 mmol) at  $22^\circ\text{C}$ . The resulting solution is allowed to stir at  $22^\circ\text{C}$  for 24 h. After this time, the solvent is evaporated under vacuum. The resulting yellow oil is purified by silica gel column chromatography (hexanes:ethyl acetate = 25:1) to afford 1.322 g aldehyde mixed with diethyl malonate as yellow oil. The yellow oil was dissolved in methanol (20 mL) followed by addition of  $\text{NaBH}_4$  (202 mg, 5.33 mmol) at  $0^\circ\text{C}$ . The resulting solution was allowed to stir at  $22^\circ\text{C}$  for 2 h. The solvent was evaporated under vacuum and the resulting yellow oil was purified by silica gel column chromatography (hexanes:ethyl acetate = 8:1) to afford 612 mg alcohol **S14** (1.33 mmol, 56% yield) as yellow oil. IR (neat): 3464 (br), 2953 (m), 2929 (m), 2857 (m), 1608 (w), 1388 (m), 1306 (m), 1142 (s), 1093 (s), 969 (m), 835 (s), 775 (m), 701 (s)  $\text{cm}^{-1}$ ;  $^1\text{H}$  NMR ( $\text{CDCl}_3$ , 400 MHz):  $\delta$  7.22–7.16 (2H, m), 7.12–7.06 (3H, m), 5.66 (1H, d,  $J = 3.6$  Hz), 5.29 (1H, d,  $J = 3.6$  Hz), 3.59–3.53 (1H, m), 3.51–

3.39 (3H, m), 2.97–2.91 (1H, m), 2.56–2.50 (1H, m), 2.21–2.13 (1H, m), 1.97–1.89 (1H, m), 1.78–1.69 (2H, m), 1.57 (1H, br s), 1.22 (6H, s), 1.19 (6H, s), 0.88 (9H, s), 0.02 (3H, s), 0.01 (3H, s);  $^{13}\text{C}$  NMR ( $\text{CDCl}_3$ , 100 MHz):  $\delta$  144.0, 131.6, 128.9, 128.1, 126.0, 83.2, 62.0, 61.8, 48.6, 46.3, 36.4, 34.5, 26.1, 25.0, 24.7, 18.4, –5.1; HRMS (ESI+): Calcd for  $\text{C}_{26}\text{H}_{46}\text{B}_1\text{O}_4\text{Si}_1$   $[\text{M}+\text{H}]^+$ : 461.32584 m/z, Found: 461.32602 m/z.

**(3S,4R)-4-(2-((tert-Butyldimethylsilyloxy)ethyl)-3-phenylhex-5-en-1-ol (S15):**

**S15** was prepared according to a previously reported procedure.<sup>9</sup> IR (neat): 3346 (br), 2952 (m), 2929 (m), 2857 (m), 1602 (w), 1420 (w), 1254 (m), 1094 (s), 937 (m), 834 (s), 774 (s), 701 (s), 663 (s)  $\text{cm}^{-1}$ ;  $^1\text{H}$  NMR ( $\text{CDCl}_3$ , 400 MHz):  $\delta$  7.28–7.25 (2H, m), 7.21–7.17 (1H, m), 7.13–7.11 (2H, m), 5.41 (1H, dt,  $J = 16.8, 10.0$  Hz), 5.01 (1H, dd,  $J = 10.0, 2.0$  Hz), 4.94 (1H, dd,  $J = 17.2, 2.0$  Hz), 3.62–3.44 (4H, m), 2.81–2.76 (1H, m), 2.45–2.38 (1H, m), 2.04–1.91 (2H, m), 1.76–1.68 (1H, m), 1.30 (1H, br s), 1.31–1.23 (1H, m), 0.88 (9H, s), 0.02 (6H, s);  $^{13}\text{C}$  NMR ( $\text{CDCl}_3$ , 100 MHz):  $\delta$  141.9, 139.5, 129.1, 128.1, 126.4, 116.6, 61.30, 61.26, 46.3, 45.7, 36.4, 35.8, 26.1, 18.4, –5.1, –5.2; HRMS (ESI+): Calcd for  $\text{C}_{20}\text{H}_{35}\text{O}_2\text{Si}_1$   $[\text{M}+\text{H}]^+$ : 335.24063 m/z, Found: 335.24137 m/z.

**(3S,4R)-4-(2-((tert-Butyldimethylsilyloxy)ethyl)-3-phenylhex-5-enal (S16):**

**S16** was prepared according to a previously reported procedure.<sup>8</sup> IR (neat): 2953 (m), 2929 (m), 2856 (m), 1725 (s), 1603 (w), 1454 (m), 1253 (m), 1093 (s), 1031 (m), 918 (m), 833 (s), 774 (s), 701 (s), 662 (m)  $\text{cm}^{-1}$ ;  $^1\text{H}$  NMR ( $\text{CDCl}_3$ , 400 MHz):  $\delta$  9.65 (1H, t,  $J = 2.0$  Hz), 7.30–7.26 (2H, m), 7.24–7.18 (1H, m), 7.15–7.12 (2H, m), 5.39 (1H, dt,  $J = 17.2, 10.0$  Hz), 5.08 (1H, dd,  $J = 10.0, 2.0$  Hz), 4.98 (1H, dd,  $J = 17.2, 2.0$  Hz), 2.83–2.81 (2H, m), 2.48–2.41 (1H, m), 1.74–1.66 (1H, m), 1.32–1.23 (1H, m), 0.88 (9H, s), 0.01 (6H, s);  $^{13}\text{C}$  NMR ( $\text{CDCl}_3$ , 100 MHz):  $\delta$  202.1, 140.7, 138.5, 129.0, 128.3, 126.8, 117.6, 61.0, 47.5, 45.3, 43.8, 35.7, 26.1, 18.4, –5.18, –5.21; HRMS (ESI+): Calcd for  $\text{C}_{20}\text{H}_{33}\text{O}_2\text{Si}_1$   $[\text{M}+\text{H}]^+$ : 333.22498 m/z, Found: 333.22592 m/z.

**tert-Butyldimethyl(((3R,4S)-4-phenyl-3-vinylhept-6-en-1-yl)oxy)silane (S17):**

**S17** was prepared according to a previously reported procedure.<sup>8</sup> IR (neat): 2953 (m), 2928 (m), 2857 (m), 1603 (w), 1453 (m), 1388 (m), 1253 (m), 1097 (s), 1004 (m), 912 (s), 833 (s), 773 (s), 701 (s), 662 (m)  $\text{cm}^{-1}$ ;  $^1\text{H}$  NMR ( $\text{CDCl}_3$ , 400 MHz):  $\delta$  7.30–7.26 (2H, m), 7.22–7.17 (1H, m), 7.14–7.12 (2H, m), 5.73–5.63 (1H, m), 5.40 (1H, dt,  $J = 16.8, 10.0$  Hz), 5.07–4.92 (4H, m), 3.64–3.58 (1H, m), 3.54–3.48 (1H, m), 2.75–2.70 (1H, m), 2.56–2.44 (3H, m), 1.76–1.68 (1H, m), 1.34–1.25 (1H, m), 0.91 (9H, s), 0.04 (6H, s);  $^{13}\text{C}$  NMR ( $\text{CDCl}_3$ , 100 MHz):  $\delta$  142.1, 139.3, 137.4, 129.3, 127.9, 126.2, 116.7, 116.1, 61.3, 49.7, 44.6, 37.8, 36.1, 26.1, 18.4, –5.12, –5.14; HRMS (ESI+): Calcd for  $\text{C}_{21}\text{H}_{35}\text{O}_1\text{Si}_1$   $[\text{M}+\text{H}]^+$ : 331.24572 m/z, Found: 331.24422 m/z.

**tert-Butyldimethyl(2-((1R,5S)-5-phenylcyclopent-2-en-1-yl)ethoxy)silane (S18):**

To a solution of **S17** (74 mg, 0.245 mmol) in  $\text{CH}_2\text{Cl}_2$  (50 mL) is added Ru complex (7.7 mg, 0.0122 mmol) at 22 °C and the mixture was allowed to stir at 22 °C for 24 h. After this time, the solution is concentrated under vacuum and the resulting dark green oil is purified by silica gel chromatography

(9) Meng, F., McGrath, K. P. & Hoveyda, A. H. *Nature* **513**, 367–374 (2014).

(hexanes:diethyl ether = 100:1) to afford 67.4 mg **S18** (0.222 mmol, 99% yield) as colorless oil. IR (neat): 2953 (m), 2928 (m), 2956 (m), 1493 (m), 1360 (w), 1254 (m), 1096 (s), 1006 (w), 982 (w), 834 (s), 774 (s), 699 (s)  $\text{cm}^{-1}$ ;  $^1\text{H}$  NMR ( $\text{CDCl}_3$ , 400 MHz):  $\delta$  7.31–7.18 (5H, m), 5.92–5.87 (2H, m), 3.61–3.55 (1H, m), 3.51–3.42 (2H, m), 3.05–2.99 (1H, m), 2.74–2.64 (2H, m), 1.30–1.24 (1H, m), 1.20–1.11 (1H, m), 0.87 (9H, s),  $-0.02$  (6H, s);  $^{13}\text{C}$  NMR ( $\text{CDCl}_3$ , 100 MHz):  $\delta$  143.1, 135.1, 130.1, 128.5, 128.2, 126.1, 62.2, 47.5, 45.9, 37.7, 34.2, 26.1, 18.4,  $-5.2$ ; HRMS (ESI+): Calcd for  $\text{C}_{19}\text{H}_{31}\text{O}_1\text{Si}_1$   $[\text{M}+\text{H}]^+$ : 303.21442 m/z, Found: 303.21426 m/z.

### Procedure for Isomerization of 1,6-Conjugate Addition Products

To a solution of substrate **4a** (15.0 mg, 0.049 mmol) in  $\text{CH}_2\text{Cl}_2$  (1 mL) is added DABCO (11.0 mg, 0.098 mmol) at 22 °C. The resulting solution is allowed to stir at 22 °C for 16 h. After this time, the solvent is evaporated. The resulting yellow oil is purified by silica gel chromatography (hexanes:ethyl acetate = 15:1) to afford 14.2 mg **14** (0.045 mmol, 95% yield) as colorless oil.

### (S)-Diethyl 2-(3-phenylhex-5-yn-1-ylidene)malonate (14):

IR (neat): 3290 (m), 2982 (m), 2936 (w), 1722 (s), 1453 (m), 1376 (m), 1254 (s), 1224 (s), 1096 (m), 1024 (m), 863 (w), 760 (m), 701 (m), 642 (m)  $\text{cm}^{-1}$ ;  $^1\text{H}$  NMR ( $\text{CDCl}_3$ , 400 MHz):  $\delta$  7.34–7.30 (2H, m), 7.26–7.20 (3H, m), 6.87 (1H, t,  $J = 7.6$  Hz), 4.29 (2H, q,  $J = 7.2$  Hz), 4.19 (2H, q,  $J = 7.2$  Hz), 3.03–2.98 (1H, m), 2.92–2.85 (1H, m), 2.74–2.62 (1H, m), 2.53–2.50 (2H, m), 1.98 (1H, t,  $J = 2.8$  Hz), 1.32 (3H, t,  $J = 7.2$  Hz), 1.25 (3H, t,  $J = 7.2$  Hz);  $^{13}\text{C}$  NMR ( $\text{CDCl}_3$ , 100 MHz):  $\delta$  165.4, 163.9, 146.8, 142.3, 130.0, 128.8, 127.5, 127.2, 82.0, 70.6, 61.4, 44.0, 34.9, 26.0, 14.3, 14.2; HRMS (ESI+): Calcd for  $\text{C}_{19}\text{H}_{23}\text{O}_4$   $[\text{M}+\text{H}]^+$ : 315.15963 m/z, Found: 315.16105 m/z. Specific rotation:  $[\alpha]_{\text{D}}^{20} -4.2$  (c 1.13,  $\text{CHCl}_3$ ).

### Procedure for Conversion to Aldehydes

To a solution of **4a** (400 mg, 1.27 mmol) in  $\text{CH}_2\text{Cl}_2$  (5 mL) is added DBU (380  $\mu\text{L}$ , 2.54 mmol) and water (46  $\mu\text{L}$ , 2.54 mmol) at 22 °C. The resulting solution is allowed to stir at 22 °C for 24 h. After this time, the solvent is evaporated under vacuum. The resulting yellow oil is purified by silica gel column chromatography (hexanes:ethyl acetate = 25:1) to afford 128 mg aldehyde **15a** (0.74 mmol, 58% overall yield) as yellow oil.

### (R)-3-Phenylhex-5-ynal (15a):

IR (neat): 3288 (m), 2920 (m), 2832 (m), 2728 (m), 1721 (s), 1495 (m), 1390 (w), 1283 (m), 1181 (m), 1068 (m), 1029 (m), 762 (m), 701 (s), 642 (m)  $\text{cm}^{-1}$ ;  $^1\text{H}$  NMR ( $\text{CDCl}_3$ , 400 MHz):  $\delta$  9.73 (1H, t,  $J = 1.6$  Hz), 7.34–7.30 (2H, m), 7.26–7.22 (3H, m), 3.50–3.43 (1H, m), 3.04 (1H, ddd,  $J = 17.2, 6.0, 1.6$  Hz), 2.84 (1H, ddd,  $J = 17.2, 8.0, 1.6$  Hz), 2.59 (1H, ddd,  $J = 16.8, 6.4, 2.4$  Hz), 2.51 (1H, ddd,  $J = 16.8, 7.6, 2.8$  Hz), 2.02 (1H, t,  $J = 2.8$  Hz);  $^{13}\text{C}$  NMR ( $\text{CDCl}_3$ , 100 MHz):  $\delta$  201.1, 142.5, 128.8, 127.4, 127.3, 81.8, 71.0, 48.5, 38.6, 26.1; HRMS (ESI+): Calcd for  $\text{C}_{12}\text{H}_{13}\text{O}_1$   $[\text{M}+\text{H}]^+$ : 173.09664 m/z, Found: 173.09651 m/z. Specific rotation:  $[\alpha]_{\text{D}}^{20} -8.3$  (c 0.60,  $\text{CHCl}_3$ ).

### (R)-3-(2-Methoxyphenyl)hex-5-ynal (15b):

IR (neat): 3288 (m), 2919 (m), 2838 (m), 2726 (m), 1721 (s), 1600 (m), 1493 (s), 1463 (m), 1292 (m), 1242 (s), 1120 (m), 1028 (m), 935 (w), 755 (s), 644 (m)  $\text{cm}^{-1}$ ;  $^1\text{H}$  NMR ( $\text{CDCl}_3$ , 400 MHz):  $\delta$  9.72 (1H,

t,  $J = 2.0$  Hz), 7.25–7.19 (2H, m), 6.92 (1H, td,  $J = 7.6, 1.2$  Hz), 6.87 (1H, d,  $J = 8.0$  Hz), 3.88–3.81 (1H, m), 3.84 (3H, s), 3.00 (1H, ddd,  $J = 16.8, 6.4, 2.0$  Hz), 2.84 (1H, ddd,  $J = 16.8, 8.0, 2.0$  Hz), 2.63 (1H, ddd,  $J = 16.8, 6.4, 2.0$  Hz), 2.56 (1H, ddd,  $J = 16.8, 8.0, 2.0$  Hz), 1.99 (1H, t,  $J = 2.0$  Hz);  $^{13}\text{C}$  NMR ( $\text{CDCl}_3$ , 100 MHz):  $\delta$  202.0, 157.0, 130.2, 128.2, 128.0, 120.8, 110.8, 82.4, 70.6, 55.4, 47.3, 32.9, 24.0; HRMS (ESI+): Calcd for  $\text{C}_{13}\text{H}_{15}\text{O}_2$   $[\text{M}+\text{H}]^+$ : 203.10720 m/z, Found: 203.10803 m/z. Specific rotation:  $[\alpha]_{\text{D}}^{20} -9.1$  (c 0.56,  $\text{CHCl}_3$ ).

**(R)-3-(tert-Butyl)hex-5-ynal (15c):**

IR (neat): 3289 (m), 2962 (m), 2872 (m), 2719 (m), 1724 (s), 1471 (m), 1397 (m), 1290 (m), 1227 (m), 1074 (w), 1018 (w), 639 (m)  $\text{cm}^{-1}$ ;  $^1\text{H}$  NMR ( $\text{CDCl}_3$ , 400 MHz):  $\delta$  9.86 (1H, t,  $J = 2.0$  Hz), 2.61–2.49 (2H, m), 2.47–2.41 (1H, m), 2.15–2.07 (2H, m), 1.98 (1H, t,  $J = 2.4$  Hz);  $^{13}\text{C}$  NMR ( $\text{CDCl}_3$ , 100 MHz):  $\delta$  202.7, 83.6, 70.8, 44.9, 42.2, 33.4, 27.7, 20.0; HRMS (ESI+): Calcd for  $\text{C}_{13}\text{H}_{15}\text{O}_2$   $[\text{M}+\text{H}]^+$ : 153.12794 m/z, Found: 153.12811 m/z. Specific rotation:  $[\alpha]_{\text{D}}^{20} -5.7$  (c 0.37,  $\text{CHCl}_3$ ).

**(R)-3-methyl-3-phenylhex-5-ynal (16):**

IR (neat): 3289 (m), 2970 (m), 2927 (m), 2848 (m), 2740 (m), 1719 (s), 1601 (w), 1498 (m), 1382 (m), 1248 (m), 1157 (m), 1032 (m), 912 (w), 763 (m), 700 (s), 643 (m)  $\text{cm}^{-1}$ ;  $^1\text{H}$  NMR ( $\text{CDCl}_3$ , 400 MHz):  $\delta$  9.54 (1H, t,  $J = 2.8$  Hz), 7.40–7.34 (4H, m), 7.27–7.23 (1H, m), 2.95 (1H, dd,  $J = 16.0, 2.4$  Hz), 2.80 (1H, dd,  $J = 16.0, 2.8$  Hz), 2.67 (1H, dd,  $J = 16.8, 2.8$  Hz), 2.60 (1H, dd,  $J = 16.8, 2.8$  Hz), 2.03 (1H, t,  $J = 2.8$  Hz), 1.59 (3H, s);  $^{13}\text{C}$  NMR ( $\text{CDCl}_3$ , 100 MHz):  $\delta$  202.2, 144.9, 128.8, 127.0, 126.0, 81.0, 71.7, 53.6, 39.6, 32.9, 25.9; HRMS (ESI+): Calcd for  $\text{C}_{13}\text{H}_{15}\text{O}_1$   $[\text{M}+\text{H}]^+$ : 187.11229 m/z, Found: 187.11313 m/z. Specific rotation:  $[\alpha]_{\text{D}}^{20} -4.3$  (c 0.48,  $\text{CHCl}_3$ ).

**Procedure for Methylation of 1,6-Conjugate Addition Product**

To a solution of diester **4a** (200 mg, 0.64 mmol) in thf (3 mL) is added NaH (31 mg, 0.76 mmol) at 0 °C. The mixture is allowed to stir at 0 °C for 1 h, after which MeI (119  $\mu\text{L}$ , 1.91 mmol) is added through a syringe at 0 °C. After the solution is allowed to stir at 22 °C for 18 h, the reaction is then quenched by addition of a saturated solution of aqueous  $\text{NH}_4\text{Cl}$  (3 mL). The water layer is washed with  $\text{Et}_2\text{O}$  (2  $\times$  3 mL), and the combined organic layers are dried over  $\text{MgSO}_4$  and concentrated under vacuum. The resulting yellow oil is purified by silica gel chromatography (hexanes:ethyl acetate = 15:1) to afford 150 mg **17** (0.48 mmol, 75% yield) as yellow oil.

**(R,E)-Diethyl 2-methyl-2-(3-phenylhex-1-en-5-yn-1-yl)malonate (17):**

IR (neat): 3294 (m), 2983 (m), 2938 (m), 2911 (w), 1730 (s), 1601 (w), 1453 (m), 1377 (m), 1256 (s), 1108 (s), 1021 (m), 972 (m), 862 (m), 759 (m), 700 (m)  $\text{cm}^{-1}$ ;  $^1\text{H}$  NMR ( $\text{CDCl}_3$ , 400 MHz):  $\delta$  7.33–7.29 (2H, m), 7.24–7.21 (3H, m), 6.07 (1H, dd,  $J = 16.4, 1.2$  Hz), 5.82 (1H, dd,  $J = 16.0, 7.2$  Hz), 4.19 (2H, q,  $J = 7.2$  Hz), 4.17 (2H, q,  $J = 7.2$  Hz), 3.59 (1H, td,  $J = 7.2, 6.8$  Hz), 2.66–2.54 (2H, m), 1.94 (1H, t,  $J = 2.8$  Hz), 1.56 (3H, s), 1.25 (3H, t,  $J = 7.2$  Hz), 1.22 (3H, t,  $J = 7.2$  Hz);  $^{13}\text{C}$  NMR ( $\text{CDCl}_3$ , 100 MHz):  $\delta$  171.3, 171.2, 142.4, 133.2, 129.4, 128.6, 127.7, 126.9, 82.2, 70.2, 61.6, 55.6, 47.0, 25.5, 20.5, 14.15, 14.11; HRMS (ESI+): Calcd for  $\text{C}_{20}\text{H}_{25}\text{O}_4$   $[\text{M}+\text{H}]^+$ : 329.17528 m/z, Found: 329.17576 m/z. Specific rotation:  $[\alpha]_{\text{D}}^{20} -5.2$  (c 1.68,  $\text{CHCl}_3$ ).

### Procedure for Enantioselective Desymmetrization of Diesters

(*R,E*)-Diethyl 2-methyl-2-(3-phenylhex-1-en-5-yn-1-yl)malonate (**17**) (35 mg, 0.11 mmol) is first dissolved in DMSO (0.5 mL) and phosphate buffer (pH = 8, 1.5 mL) and then pig liver esterase (PLE) is introduced (11 mg). The solution is allowed to stir at 22 °C for 0.5 h after which the reaction is quenched by addition of diethyl ether (10 mL). The organic layer is washed with brine three times (3 × 5 mL), dried over MgSO<sub>4</sub> and concentrated *in vacuo*. The residue was dissolved in dry THF (1.0 mL). At 0 °C, ClCO<sub>2</sub>Me (13 μL, 0.165 mmol) and Et<sub>3</sub>N (22 μL, 0.165 mmol) are added. The mixture is allowed to stir at 22 °C for 1 h. After filtration and removal of volatiles *in vacuo*, the residue is dissolved in MeOH (1.0 mL) and NaBH<sub>4</sub> (15 mg, 0.33 mmol) is added at 0 °C. The solution is then allowed to stir at 0 °C for 1 h. At this time, the reaction is quenched by addition of a saturated solution of NH<sub>4</sub>Cl. The aqueous layer is washed with ethyl acetate (3 × 5 mL) and the combined organic layers are dried over MgSO<sub>4</sub>, concentrated and purified by silica gel chromatography (hexanes/ethyl acetate = 8:1) to afford **18** (25 mg, 72% overall yield) as colorless oil.

#### (*2R,5R,E*)-Diethyl 2-(hydroxymethyl)-2-methyl-5-phenyloct-3-en-7-ynoate (**18**):

IR (neat): 3486 (br), 3294 (m), 2978 (m), 2925 (m), 2854 (m), 1722 (s), 1494 (m), 1453 (m), 1375 (m), 1233 (m), 1123 (m), 1041 (s), 974 (m), 864 (m), 759 (m), 699 (s), 635 (s) cm<sup>-1</sup>; <sup>1</sup>H NMR (CDCl<sub>3</sub>, 400 MHz) δ 7.19–7.32 (m, 5H), 5.82 (dd, 1H, *J* = 16.0, 7.2 Hz), 5.67 (dd, 1H, *J* = 16.0, 1.2 Hz), 4.16 (qd, 2H, *J* = 7.2, 3.2 Hz), 3.72 (dd, 1H, *J* = 11.2, 6.4 Hz), 3.57 (dd, 1H, *J* = 11.2, 6.4 Hz), 3.53 (td, 1H, *J* = 7.6, 7.2 Hz), 2.57 (dd, 2H, *J* = 6.8, 2.0 Hz), 2.32 (t, 1H, *J* = 6.4 Hz), 1.94 (t, 1H, *J* = 2.4 Hz); 1.31 (s, 3H), 1.24 (t, 3H, *J* = 7.2 Hz); <sup>13</sup>C NMR (CDCl<sub>3</sub>, 100 MHz) δ 175.4, 142.5, 132.9, 128.5, 127.5, 126.8, 82.2, 70.0, 68.4, 61.0, 50.0, 47.2, 25.6, 19.6, 14.1; HRMS (ESI<sup>+</sup>): Calcd for C<sub>18</sub>H<sub>23</sub>O<sub>3</sub> [M+H]<sup>+</sup>: 287.16472 m/z, Found: 287.16536 m/z. Specific rotation: [α]<sub>D</sub><sup>20</sup> -3.4 (*c* 0.41, CHCl<sub>3</sub>).

#### Conversion to a γ,δ-unsaturated carbonyl compounds:

#### Diethyl 2-((*3S,4S,E*)-4-acetyl-6-((*tert*-butyldimethylsilyl)oxy)-3-phenethylhex-1-en-1-yl)malonate (**19**):

IR (neat): 2953 (m), 2930 (m), 2857 (m), 1733 (s), 1710 (m), 1603 (w), 1471 (m), 1366 (m), 1253 (m), 1149 (m), 1095 (m), 1032 (m), 974 (m), 834 (s), 776 (m), 700 (m) cm<sup>-1</sup>; <sup>1</sup>H NMR (CDCl<sub>3</sub>, 400 MHz): δ 7.28–7.24 (2H, m), 7.19–7.11 (3H, m), 5.73 (1H, dd, *J* = 15.6, 8.4 Hz), 5.39 (1H, dd, *J* = 15.6, 9.6 Hz), 4.25–4.18 (4H, m), 4.03 (1H, d, *J* = 8.4 Hz), 3.53–3.46 (2H, m), 2.70–2.61 (1H, m), 2.60–2.56 (1H, m), 2.50–2.43 (1H, m), 2.37–2.29 (1H, m), 2.06 (3H, s), 1.77–1.52 (4H, m), 1.28 (3H, t, *J* = 7.2 Hz), 1.27 (3H, t, *J* = 7.2 Hz), 0.86 (9H, s), -0.003 (6H, s); <sup>13</sup>C NMR (CDCl<sub>3</sub>, 100 MHz): δ 211.7, 168.23, 168.16, 141.8, 137.2, 128.6, 128.5, 126.0, 124.7, 61.83, 61.81, 61.4, 55.7, 54.1, 44.4, 34.3, 33.4, 32.6, 30.3, 26.0, 18.4, 14.21, 14.18, -5.36, -5.40; HRMS (ESI<sup>+</sup>): Calcd for C<sub>29</sub>H<sub>50</sub>N<sub>1</sub>O<sub>6</sub>Si<sub>1</sub> [M+H]<sup>+</sup>: 536.34074 m/z, Found: 536.33899 m/z. Specific rotation: [α]<sub>D</sub><sup>20</sup> +8.4 (*c* 1.25, CHCl<sub>3</sub>).

#### Formal Synthesis of (-)-Equisetin

#### (*R,E*)-Diethyl 2-(3-methylhex-1-en-5-yn-1-yl)malonate (**4n**):

IR (neat): 3290 (m), 2980 (m), 2931 (m), 1731 (s), 1459 (m), 1369 (m), 1259 (m), 1217 (m), 1150 (m), 1032 (m), 972 (m), 863 (w), 635 (m) cm<sup>-1</sup>; <sup>1</sup>H NMR (CDCl<sub>3</sub>, 400 MHz): δ 5.77–5.66 (2H, m), 4.20

(4H, q,  $J = 7.2$  Hz), 3.97 (1H, d,  $J = 7.6$  Hz), 2.48–2.41 (1H, m), 2.28–2.14 (2H, m), 1.97 (1H, t,  $J = 2.4$  Hz), 1.26 (6H, t,  $J = 7.2$  Hz), 1.12 (3H, d,  $J = 7.2$  Hz);  $^{13}\text{C}$  NMR ( $\text{CDCl}_3$ , 100 MHz)  $\delta$  168.4, 140.2, 121.1, 82.5, 69.8, 61.7, 55.7, 35.7, 25.9, 19.2, 14.2; HRMS (ESI+): Calcd for  $\text{C}_{14}\text{H}_{21}\text{O}_4$   $[\text{M}+\text{H}]^+$ : 253.14398 m/z, Found: 253.14394 m/z.

Enantiomeric purity of **4n** was determined by HPLC analysis in comparison with authentic racemic material (92:8 e.r. shown; Chiralcel OZ–H column, 99:1 hexanes/*i*-PrOH, 0.8 mL/min, 220 nm). Specific rotation:  $[\alpha]_{\text{D}}^{20} -3.6$  ( $c$  0.89,  $\text{CHCl}_3$ ).

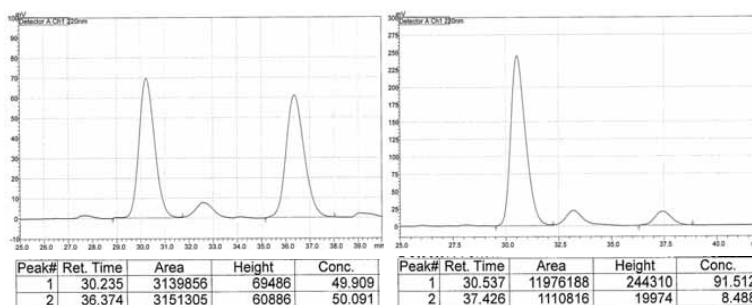

| Peak # | Time (min) | Area (%) | Peak # | Time (min) | Area (%) |
|--------|------------|----------|--------|------------|----------|
| 1      | 30.235     | 49.909   | 1      | 30.537     | 91.512   |
| 2      | 36.374     | 50.091   | 2      | 37.426     | 8.488    |

**Diethyl 2-((*R*,1*E*,5*E*)-3-methyl-6-(4,4,5,5-tetramethyl-1,3,2-dioxaborolan-2-yl)hexa-1,5-dien-1-yl)malonate (**20**):**

Alkenylboronotae **20** was prepared according to a previously reported procedure.<sup>10</sup> IR (neat): 2978 (m), 2932 (m), 1733 (s), 1637 (m), 1361 (s), 1318 (s), 1215 (m), 1143 (s), 1032 (m), 969 (m), 849 (m)  $\text{cm}^{-1}$ ;  $^1\text{H}$  NMR ( $\text{CDCl}_3$ , 400 MHz):  $\delta$  6.53 (1H, dt,  $J = 18.0, 6.8$  Hz), 5.69–5.59 (2H, m), 5.42 (1H, dd,  $J = 18.0, 1.6$  Hz), 4.19 (2H, q,  $J = 7.2$  Hz), 4.18 (2H, q,  $J = 7.2$  Hz), 2.36–2.30 (1H, m), 2.26–2.19 (1H, m), 2.14–2.07 (1H, m), 1.25 (12H, s), 1.00 (3H, d,  $J = 6.8$  Hz);  $^{13}\text{C}$  NMR ( $\text{CDCl}_3$ , 100 MHz)  $\delta$  168.55, 168.53, 152.1, 141.8, 120.2, 83.1, 61.6, 55.8, 43.2, 35.8, 24.9, 19.6, 14.19, 14.17; HRMS (ESI+): Calcd for  $\text{C}_{20}\text{H}_{34}\text{B}_1\text{O}_6$   $[\text{M}+\text{H}]^+$ : 381.24484 m/z, Found: 381.24567 m/z. Specific rotation:  $[\alpha]_{\text{D}}^{20} -5.4$  ( $c$  1.52,  $\text{CHCl}_3$ ).

**(*R*,*E*)-Ethyl 2,6-dimethyl-8-oxooct-2-enoate (**21**):**

To a solution of alkyne **20** (4.61 g, 12.1 mmol) in THF (50 mL) and  $\text{H}_2\text{O}$  (50 mL) is added  $\text{NaBO}_3 \cdot 4\text{H}_2\text{O}$  (11.2 g, 36.4 mmol) at 22 °C. The resulting mixture is allowed to stir at 22 °C for 1 h after which  $\text{Et}_2\text{O}$  (30 mL) is added and the aqueous layer is washed with  $\text{Et}_2\text{O}$  ( $2 \times 30$  mL). The combined organic layers are concentrated under vacuum, affording yellow oil that is then dissolved in  $\text{CH}_2\text{Cl}_2$  (100 mL) and treated with the Wittig reagent (4.83 g, 13.3 mmol). The resulting mixture is allowed to stir at 22 °C for 12 h. At this time, DBU (3.7 mL, 24.2 mmol) and  $\text{H}_2\text{O}$  (0.9 mL, 24.2 mmol) are added, and the mixture is allowed to stir at 22 °C for another 24 h. The solution is then concentrated under vacuum and the resulting yellow solid purified by silica gel chromatography (hexanes/ethyl acetate = 10:1) to give **21** (1.72 g, 67% overall yield) as colorless oil. The physical and spectral data

(10) Jang, H., Zhugralin, A. R., Lee, Y. & Hoveyda, A. H. *J. Am. Chem. Soc.* **133**, 7859–7871 (2011).



were identical to those previously reported.<sup>11</sup> <sup>1</sup>H NMR (CDCl<sub>3</sub>, 400 MHz): δ 9.75 (1H, t, *J* = 2.0 Hz), 6.73–6.69 (1H, m), 4.18 (4H, q, *J* = 7.2 Hz), 2.44–2.38 (1H, m), 2.30–2.22 (1H, m), 2.18–2.06 (3H, m), 1.82 (3H, s), 1.51–1.44 (1H, m), 1.41–1.34 (1H, m), 1.28 (3H, t, *J* = 7.2 Hz), 0.98 (3H, d, *J* = 6.8 Hz); <sup>13</sup>C NMR (CDCl<sub>3</sub>, 100 MHz) δ 202.5, 168.2, 141.4, 128.3, 60.6, 51.0, 35.6, 27.9, 26.2, 19.8, 14.4, 12.5. Specific rotation:  $[\alpha]_{\text{D}}^{20} +13.7$  (*c* 2.69, CHCl<sub>3</sub>).

**(*R,2E,8E*)-Ethyl 2,6-dimethyl-9-(4,4,5,5-tetramethyl-1,3,2-dioxaborolan-2-yl)nona-2,8-dienoate (22):**

To a suspension of CrCl<sub>2</sub> (15.9 g, 130 mmol) in THF (100 mL) is added Cl<sub>2</sub>CHB(pin) (6.83 g, 32.4 mmol) and aldehyde **21** (3.44 g, 16.2 mmol) at 22 °C; this is followed by the addition of a solution of LiI (8.67 g, 64.8 mmol) in THF (50 mL). The mixture is allowed to stir at 22 °C for 16 h, after which the reaction is quenched by addition of a saturated solution of aqueous NH<sub>4</sub>Cl. The aqueous layer is then washed with Et<sub>2</sub>O (2 × 80 mL) and the combined organic layers are concentrated under vacuum. The resulting green oil is purified by silica gel chromatography (hexanes/ethyl acetate = 20:1) to give the **22** (5.11 g, 94% yield) as colorless oil. IR (neat): 2977 (m), 2928 (m), 1708 (s), 1638 (m), 1459 (m), 1362 (s), 1319 (s), 1267 (s), 1143 (s), 1095 (m), 1032 (m), 970 (m), 849 (m), 744 (m) cm<sup>-1</sup>; <sup>1</sup>H NMR (CDCl<sub>3</sub>, 400 MHz): δ 6.72 (1H, td, *J* = 7.2, 2.0 Hz), 6.57 (1H, dt, *J* = 18.0, 7.2 Hz), 5.42 (1H, d, *J* = 18.0 Hz), 4.17 (2H, q, *J* = 7.2 Hz), 2.22–2.09 (3H, m), 2.05–1.98 (1H, m), 1.81 (3H, s), 1.64–1.55 (1H, m), 1.51–1.41 (1H, m), 1.28 (3H, t, *J* = 7.2 Hz), 1.25 (12H, s), 0.90 (3H, d, *J* = 6.8 Hz); <sup>13</sup>C NMR (CDCl<sub>3</sub>, 100 MHz) δ 168.4, 152.9, 142.4, 127.8, 83.1, 60.5, 43.5, 35.4, 32.3, 26.4, 24.9, 19.6, 14.4, 12.4; HRMS (ESI+): Calcd for C<sub>19</sub>H<sub>34</sub>B<sub>1</sub>O<sub>4</sub> [M+H]<sup>+</sup>: 337.25501 m/z, Found: 337.25570 m/z. Specific rotation:  $[\alpha]_{\text{D}}^{20} +4.1$  (*c* 4.46, CHCl<sub>3</sub>).

**(*R,2E,8E,10E*)-Ethyl 12-(methoxymethoxy)-2,6-dimethyldodeca-2,8,10-trienoate (24):**

To a solution of alkenylboronate **22** at 22 °C (100 mg, 0.297 mmol) and iodide **23** (102 mg, 0.446 mmol) in DMF (3 mL) is added Ba(OH)<sub>2</sub>•8H<sub>2</sub>O (141 mg, 0.446 mmol) and Pd(dppf)Cl<sub>2</sub> (12.1 mg, 0.0149 mmol). The mixture is allowed to stir at 22 °C for 16 h and then the reaction is quenched by addition of water (5 mL) and Et<sub>2</sub>O (5 mL). The aqueous layer is washed with Et<sub>2</sub>O (2 × 5 mL) and the combined organic layer are concentrated under vacuum and the resulting yellow oil is purified by silica gel chromatography (hexanes/ethyl acetate = 10:1) to afford **24** (90.6 g, 94% yield) as colorless oil. IR (neat): 2952 (m), 2927 (m), 1707 (s), 1650 (m), 1459 (m), 1379 (m), 1263 (m), 1147 (s), 1099 (s), 1038 (s), 990 (s), 922 (m), 745 (m) cm<sup>-1</sup>; <sup>1</sup>H NMR (CDCl<sub>3</sub>, 400 MHz): δ 6.72 (1H, td, *J* = 7.2, 1.2 Hz), 6.23 (1H, dd, *J* = 15.2, 10.4 Hz), 6.03 (1H, dd, *J* = 15.2, 10.4 Hz), 5.69–5.60 (2H, m), 4.63 (2H, s), 4.17 (2H, q, *J* = 7.2 Hz), 4.07–4.05 (2H, m), 3.36 (3H, s), 2.20–2.05 (3H, m), 1.98–1.91 (1H, m), 1.81 (3H, s), 1.56–1.40 (2H, m), 1.28 (3H, t, *J* = 7.2 Hz), 0.88 (2H, d, *J* = 6.4 Hz); <sup>13</sup>C NMR (CDCl<sub>3</sub>, 100 MHz) δ 168.4, 142.3, 133.8, 133.4, 131.0, 127.8, 126.7, 95.6, 67.7, 60.5, 55.3, 40.1, 35.3, 33.0, 26.4, 19.4, 14.4, 12.4; HRMS (ESI+): Calcd for C<sub>18</sub>H<sub>34</sub>N<sub>1</sub>O<sub>4</sub> [M+NH<sub>4</sub>]<sup>+</sup>: 328.24878 m/z, Found: 328.24770 m/z. Specific rotation:  $[\alpha]_{\text{D}}^{20} -0.9$  (*c* 2.53, CHCl<sub>3</sub>).

(11) Yin, J., Wang, C., Kong, L., Cai, S. & Gao, S. *Angew. Chem. Int. Edn* **51**, 7786–7789 (2012).

## Data for Background and Control Experiments

**Scheme S4:** Background and Control Experiments

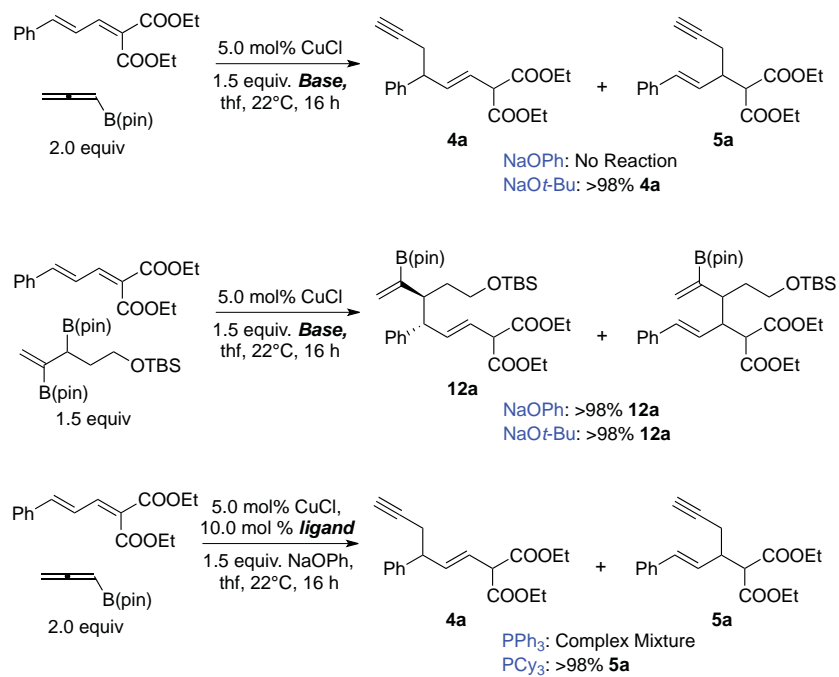

## 3. NMR Spectra

The <sup>1</sup>H and <sup>13</sup>C NMR spectra of the compounds mentioned above are shown in the following pages:

Sample Name: 9e  
 Data Collected on: vnmr13-vnmr-s400  
 Archive directory:  
 Sample directory:  
 FID file: PROTON  
 Pulse Sequence: PROTON (szpu1)  
 Date collected on: Jul 1 2015

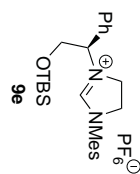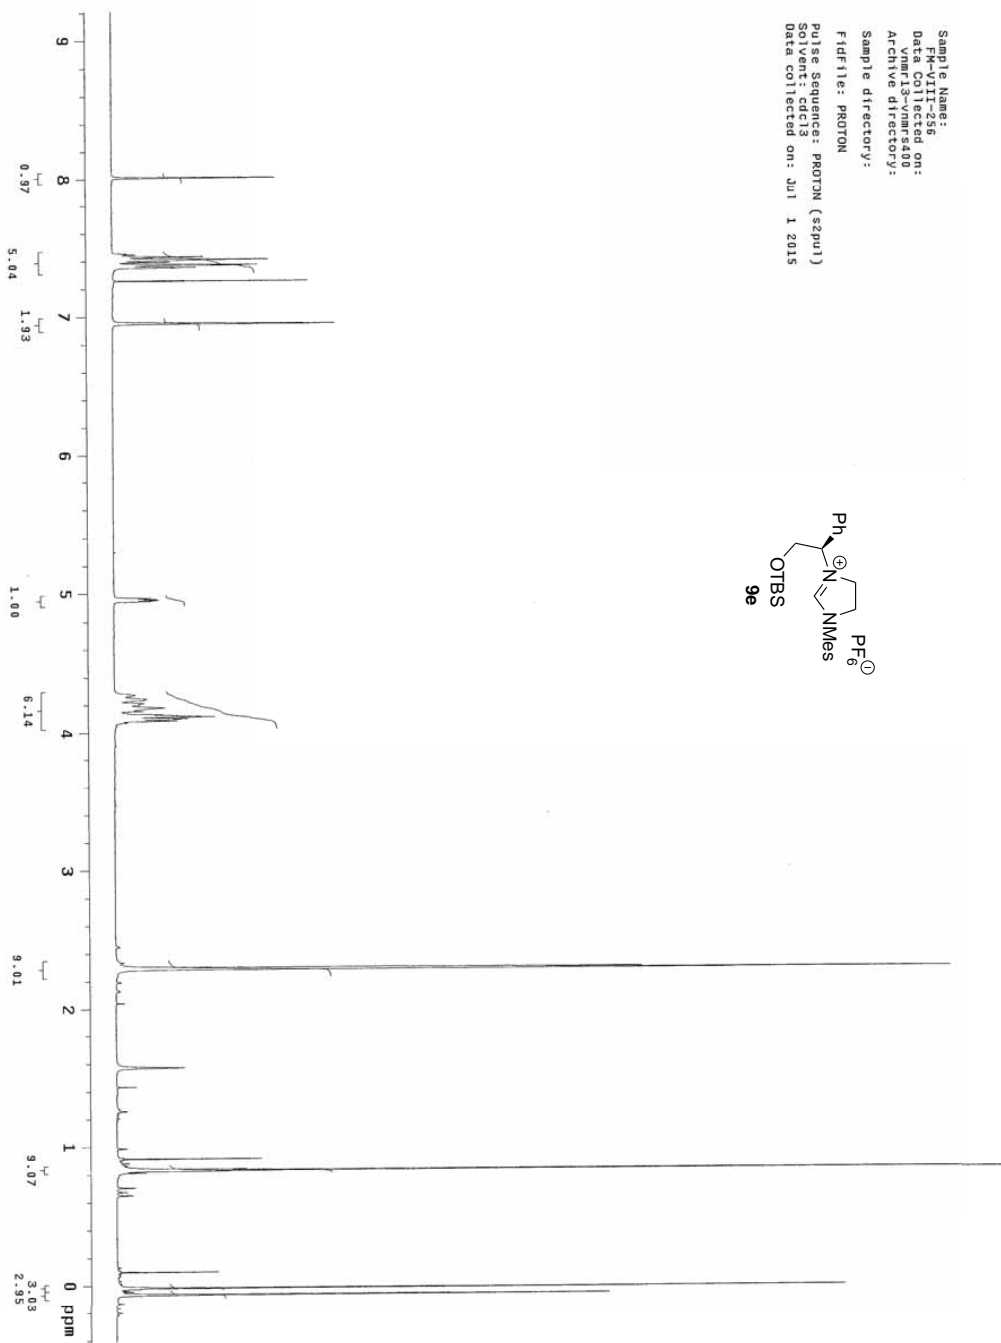

Sample Name: F1-VII-256  
Data Collected on: vnmr13-vnmr-s400  
Archive directory:  
Sample directory:  
Fidfile: CARBON  
Pulse Sequence: CARBON (zgpg1)  
Solvent: cdcl3  
Data collected on: Jul 1 2015

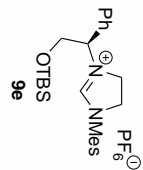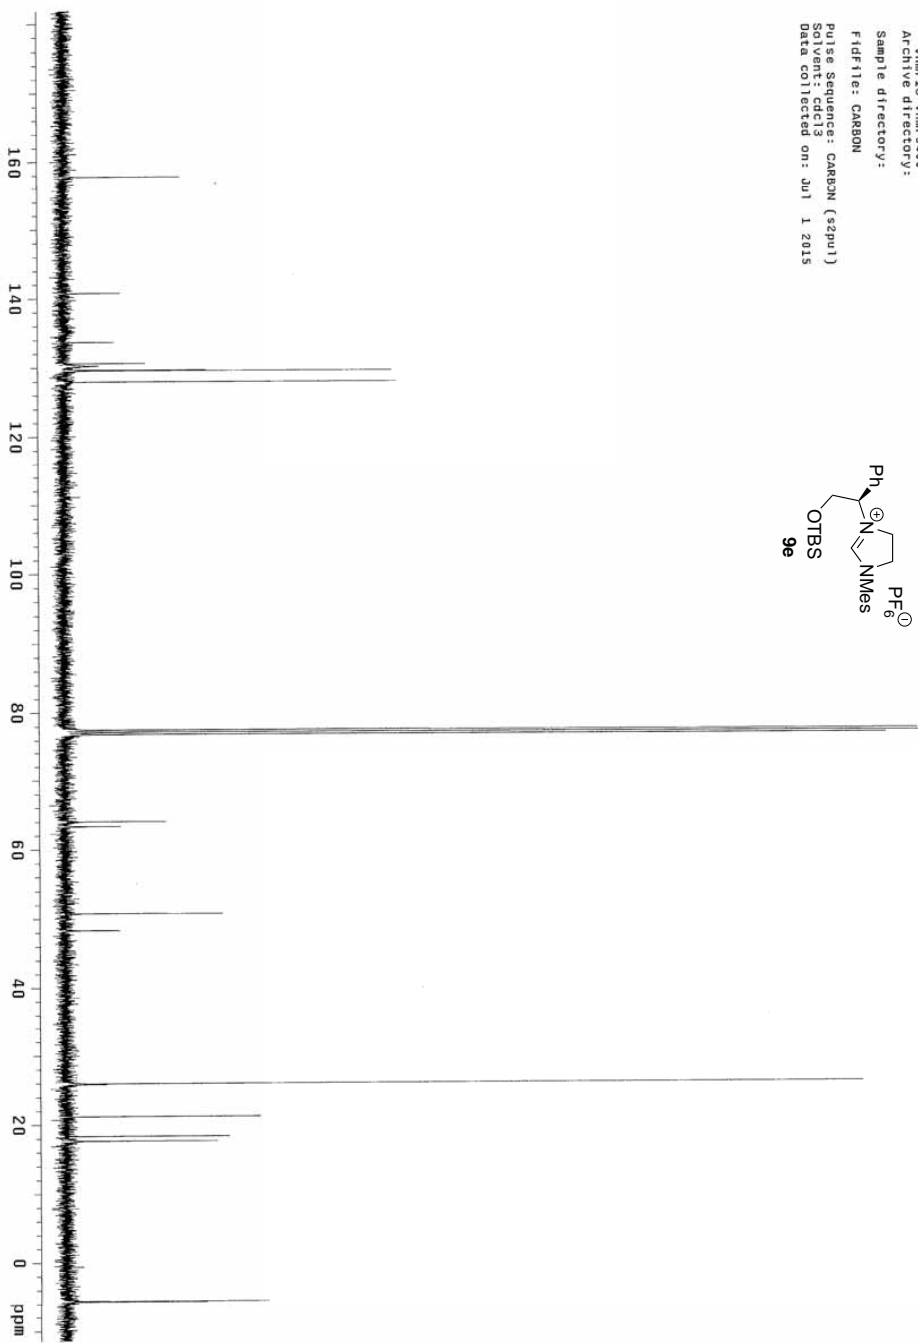

MKR-V-258-2A-1H, crude

Sample Name:  
 PR-IX-139  
 Data Collected on:  
 nmr13-vnmr5400  
 Archive directory:

Sample directory:

File(s): PROTON

Pulse Sequence: PROTON (s2pul1)  
 Solvent: cdcl3  
 Data collected on: Feb 11 2016

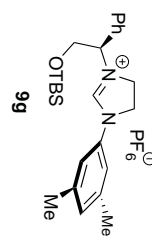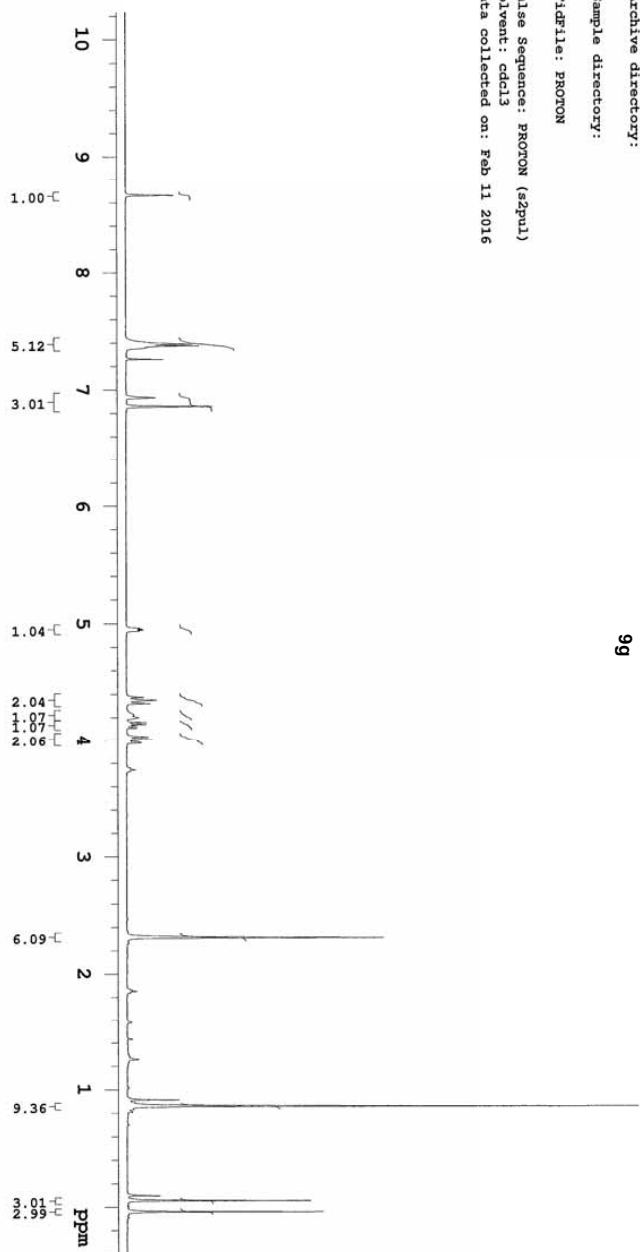

MKR-V-258-2A-1H, crude

Sample Name:

FM-IX-139

Data Collected on:

nmr13-vnmrs400

Archive directory:

Sample directory:

Filefile: FM-IX-139-CNMR-2

Pulse Sequence: CARBON (szpul)

Solvent: cdcl3

Data collected on: Feb 11 2016

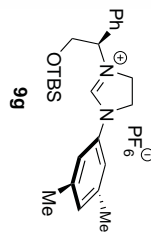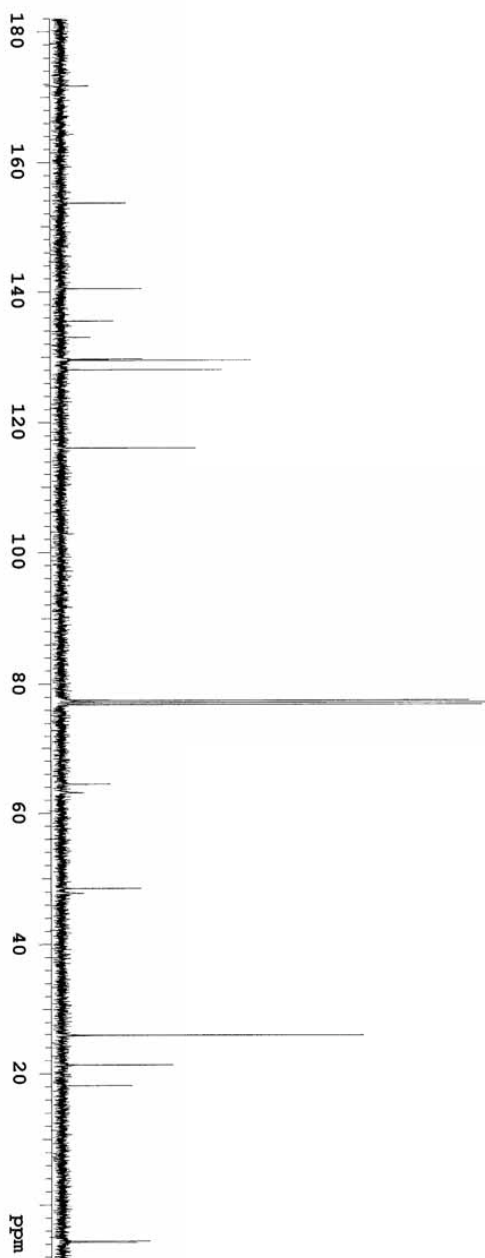

Sample Name: FM-VII-170  
Data Collected on: 1/27/15  
Archive directory:  
Sample directory:  
Fidfile: PROTON  
Pulse Sequence: PROTON (s2pu1)  
Solvent: cdcl3  
Data collected on: Jan 27 2015

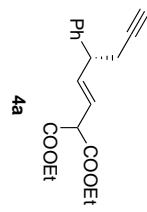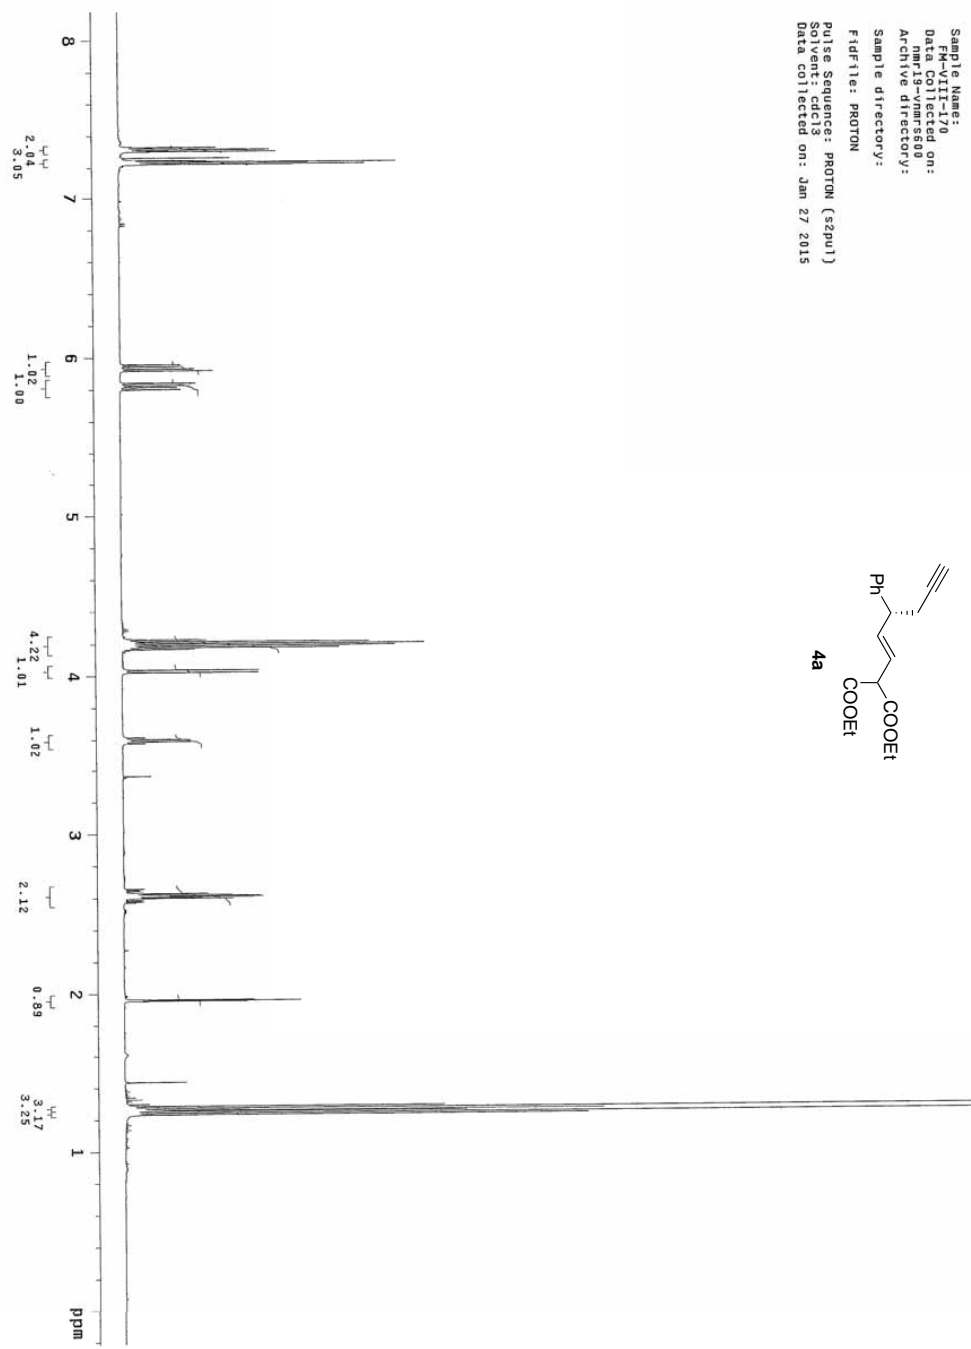

Sample Name: Ph-VIII-170  
Data File: cdc13  
Pulse Sequence: CARRCN (s2pu1)  
Solvent: cdCl3  
Archive directory:  
Sample directory:  
FID File: CARRCN  
Pulse Sequence: CARRCN (s2pu1)  
Solvent: cdCl3  
Data collected on: Jan 27 2015

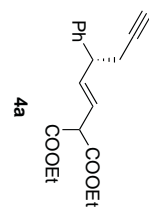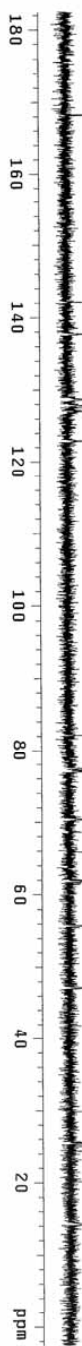



Sample Name: FM-VII-18d  
 Date: 2015-01-27 11:04:00  
 Sample ID: vsmc800  
 Archive directory:  
 Sample directory:  
 FID file: PROTON  
 Pulse Sequence: PROTON (zgpg3)  
 Solvent: cdcl3  
 Data collected on: Jan 27 2015

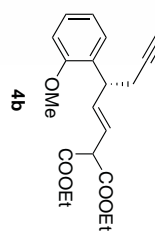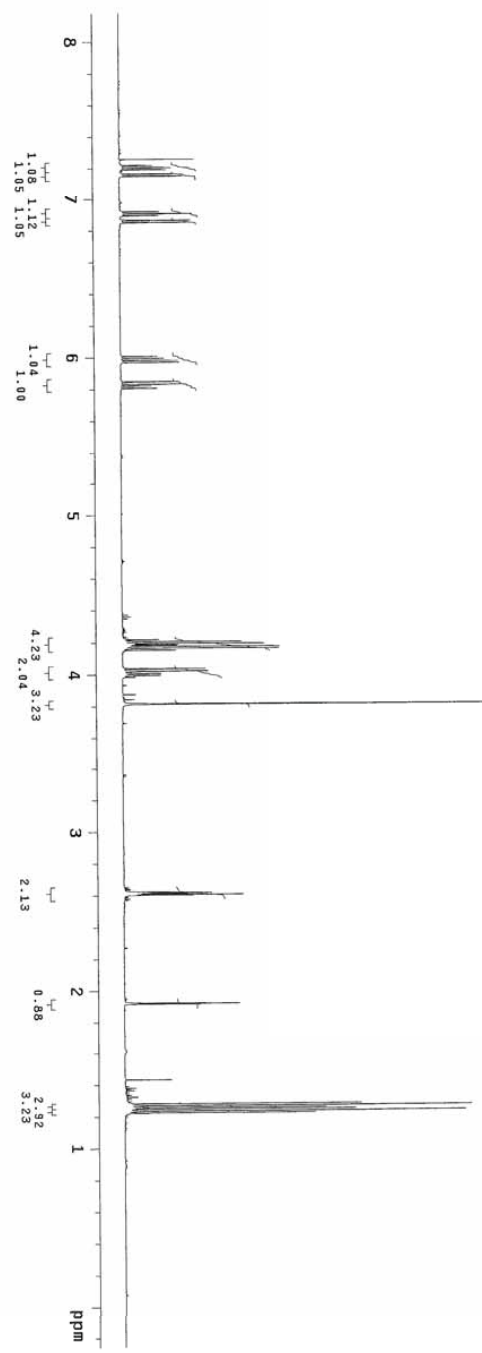

Sample Name: FM-VII-180  
Data collected on: 1/27/2015  
Archive directory:   
Sample directory:   
Fidfile: CARBON  
Pulse Sequence: CARBON (s2pul)  
Solvent: cdcl3  
Data collected on: Jan 27 2015

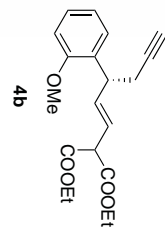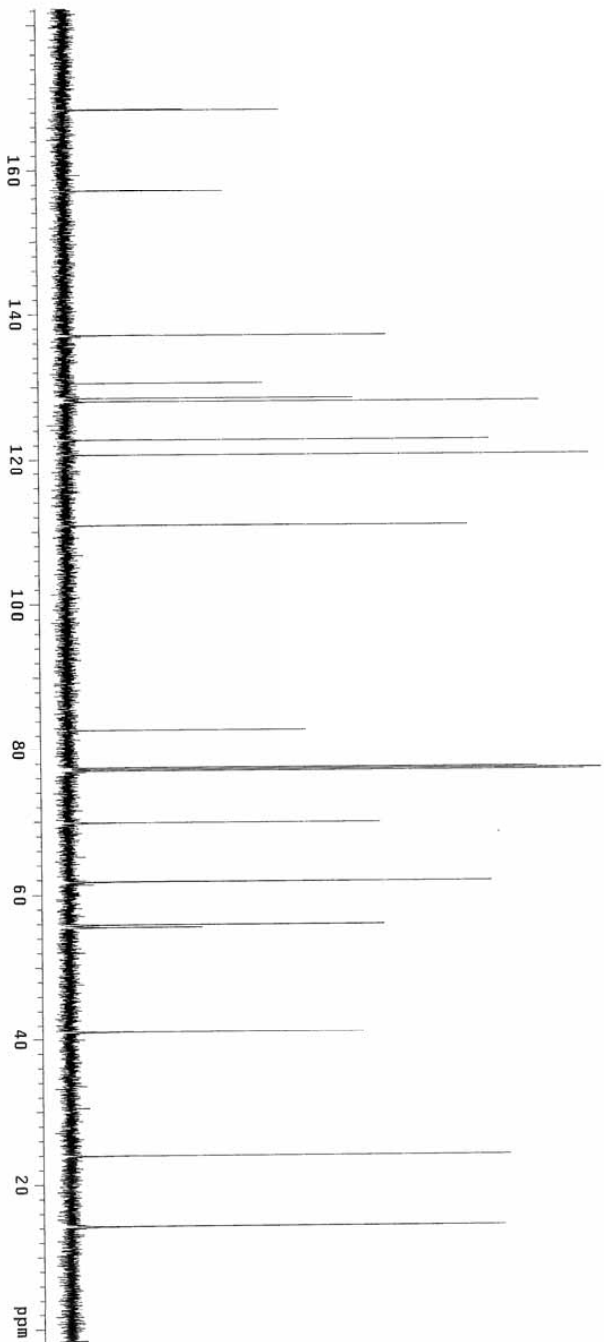

Sample Name: 4c  
 Date Collected on: 4/14/2015  
 Vnmr13-vnmr5400  
 Archive directory:  
 Sample directory:  
 F1dfiles: PROTON  
 Pulse Sequence: PROTON (szpu1)  
 Solvent: CDCl3  
 Data Collected on: Apr 14 2015

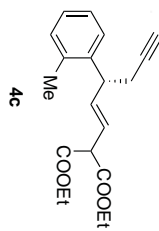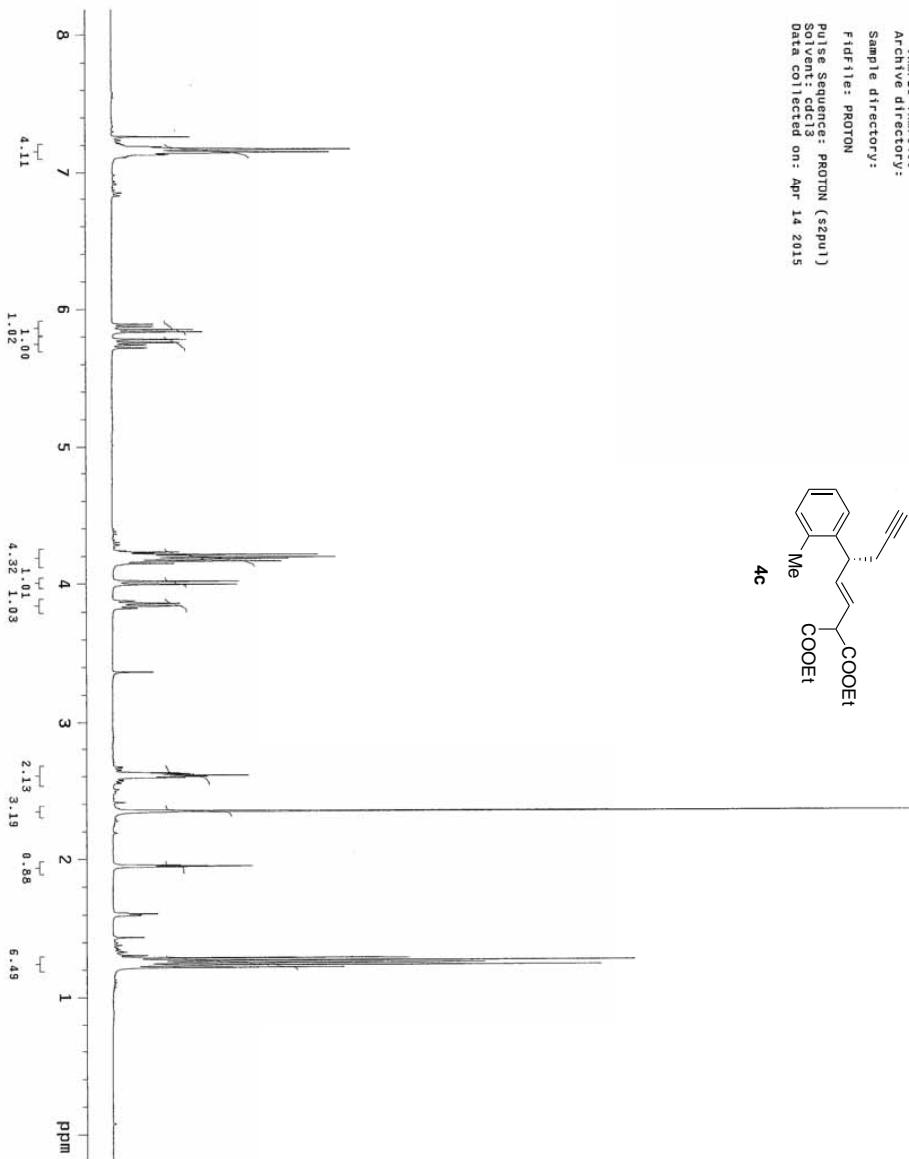

Sample Name: 4c  
File Name: 4c  
Data Collected on: 4/14/15  
Vnmr13-vnmr-s400  
Archive directory:  
Sample directory:  
Fid file: CARBON  
Pulse Sequence: CARBON (szpu1)  
Solvent: CDCl3  
Date collected on: Apr 14 2015

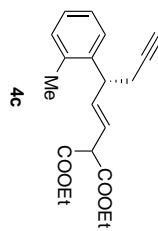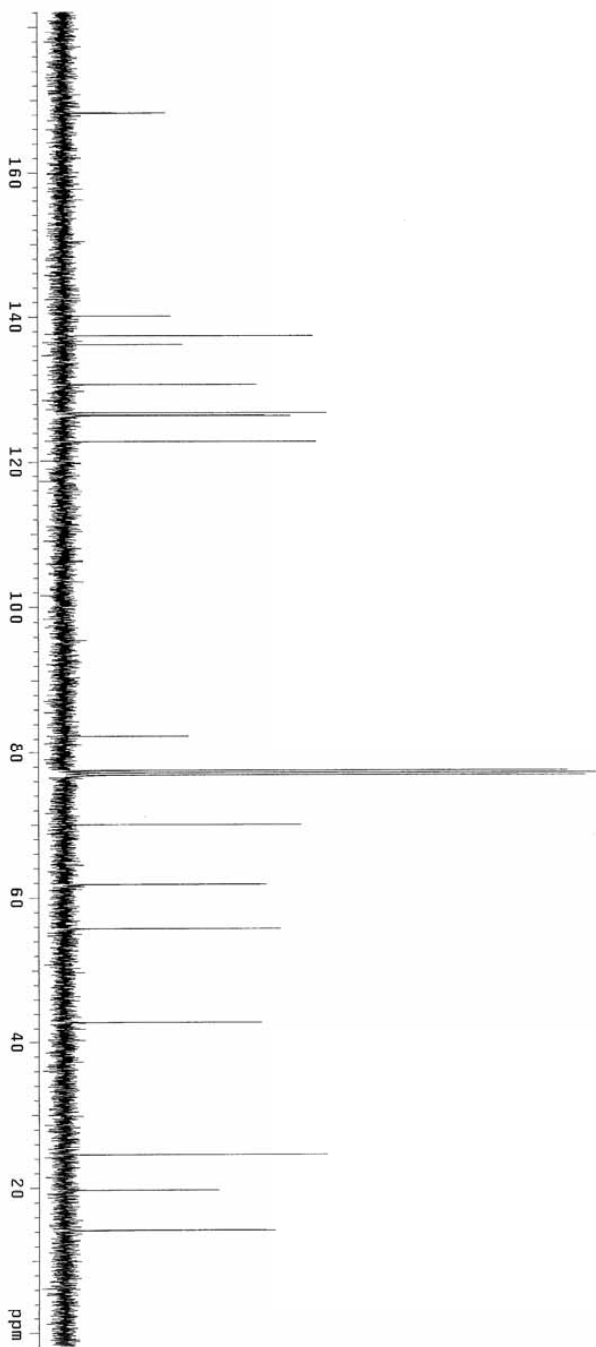

Sample Name: M-VIII-21d  
 Data Collected on: nmr13-vmr3400  
 Archive directory:  
 Sample directory:  
 F1dfile: M-VIII-21d  
 Pulse Sequence: PROTON (sgpu1)  
 Solvent: cdcl3  
 Data Collected on: Mar 31 2015

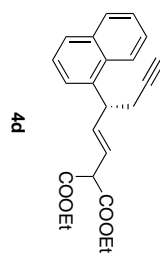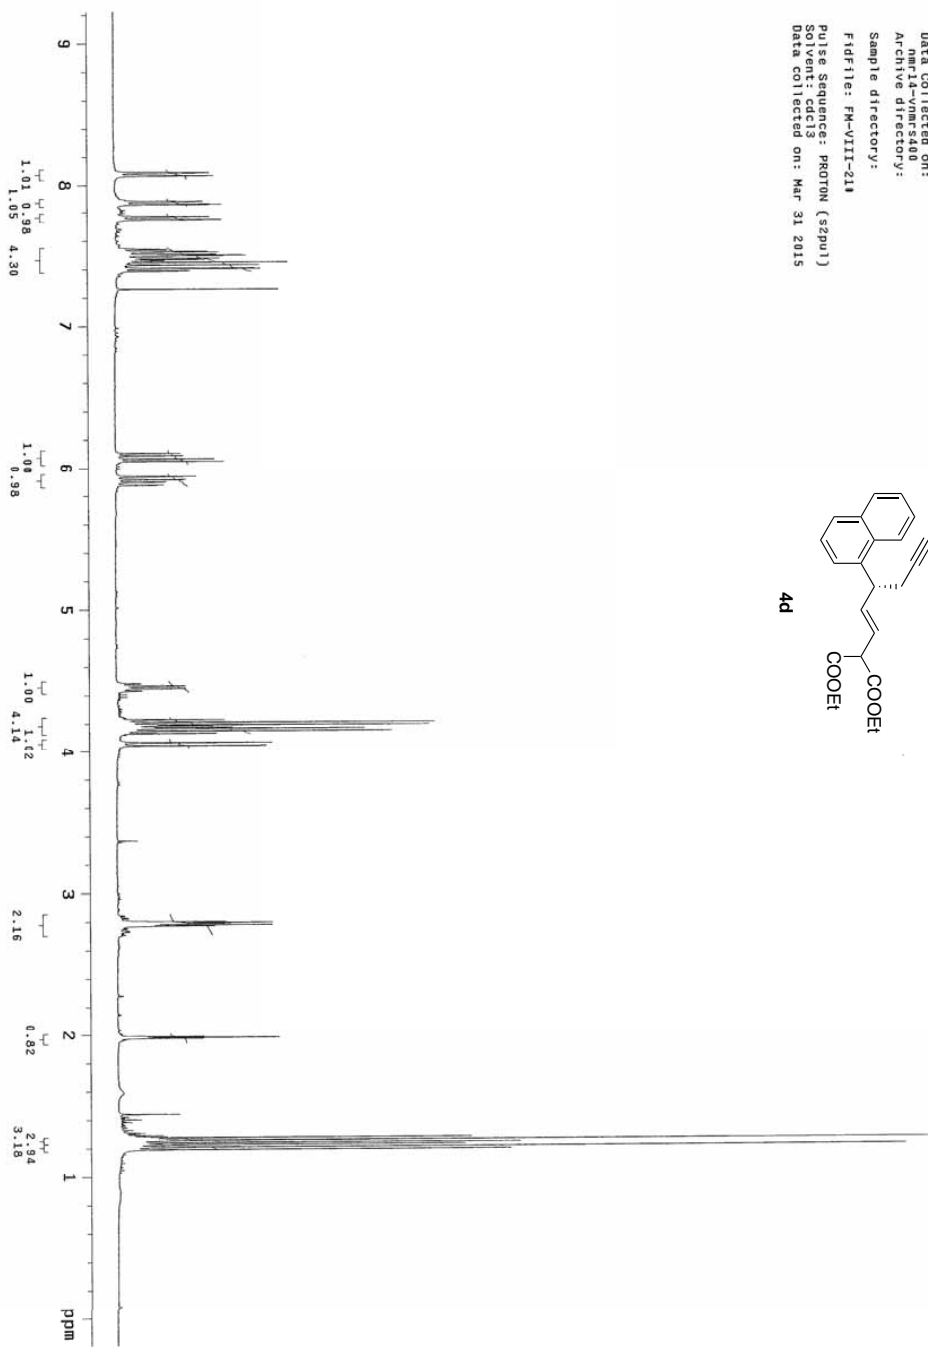

Sample Name: 4d  
Date Collected on: 03/31/2015  
mar19-vmr660  
Archive directory:  
Sample directory:  
FidFile: CARBON  
Pulse Sequence: CARBON (s2pu1)  
Date Collected on: Mar 31 2015

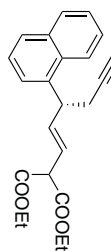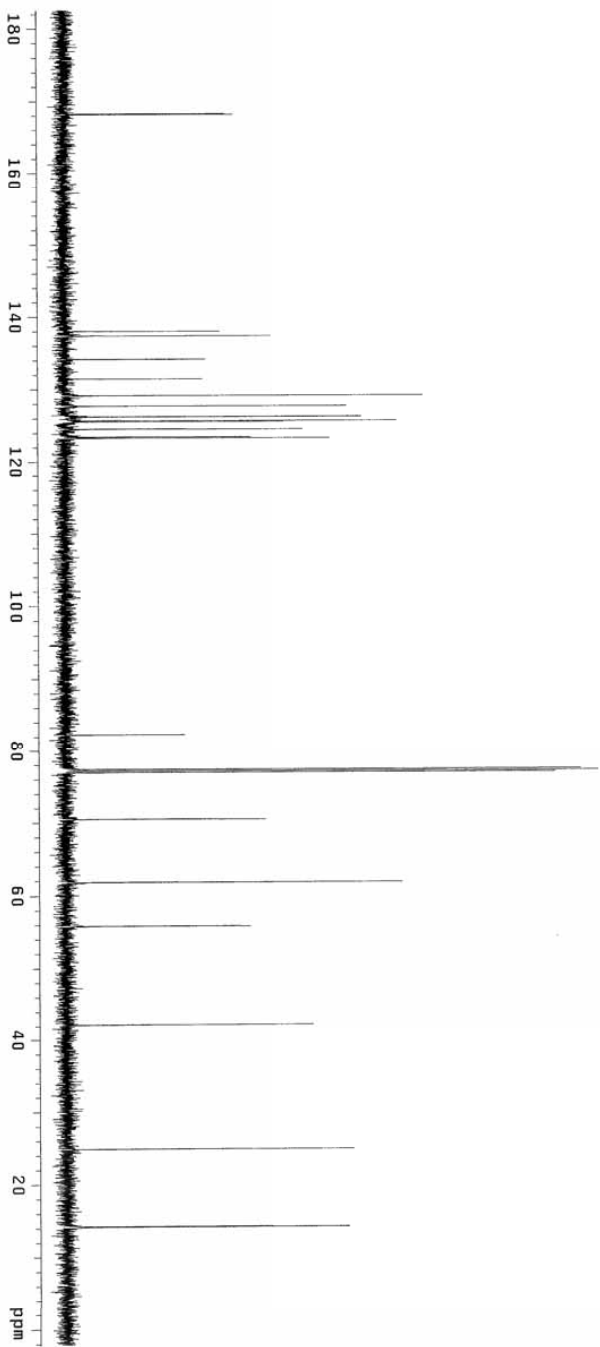

Sample Name: FM-VII-178  
 Date Collected on: 2015-01-27 15:58:00  
 Archive directory:  
 Sample directory:  
 FID file: PROTON  
 Pulse Sequence: PROTON (szpu1)  
 Solvent: cdc13  
 Data collected on: Jan 27 2015

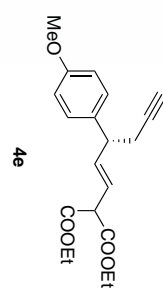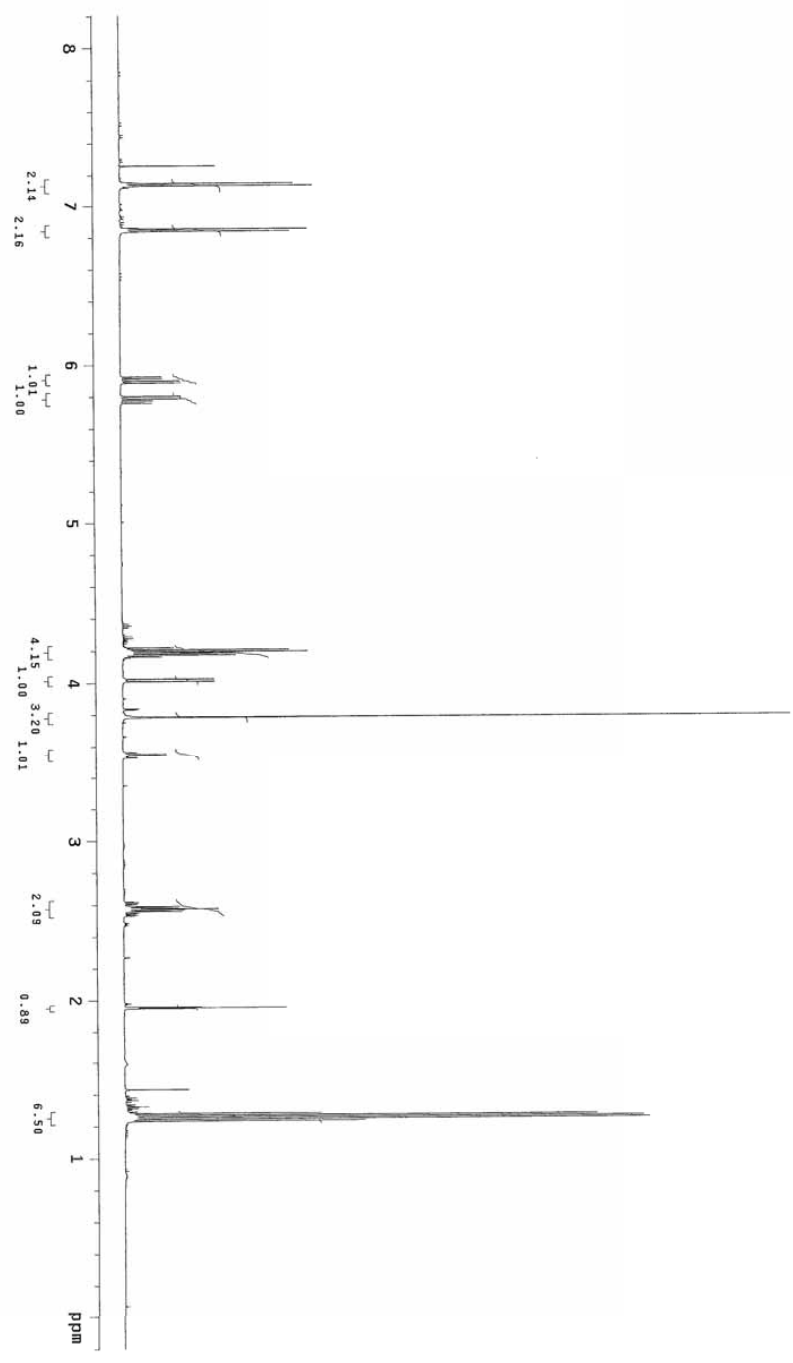

Sample Name: FM-VII-178  
Data Collected on: 11/10/2015  
Sample Name: FM-VII-178  
Archive directory:  
Sample directory:  
Fidfile: CARBON  
Pulse Sequence: CARBON (zgpg1)  
Solvent: cdcl3  
Data collected on: Jan 27 2015

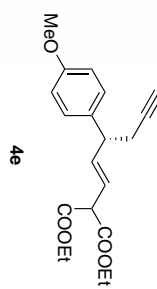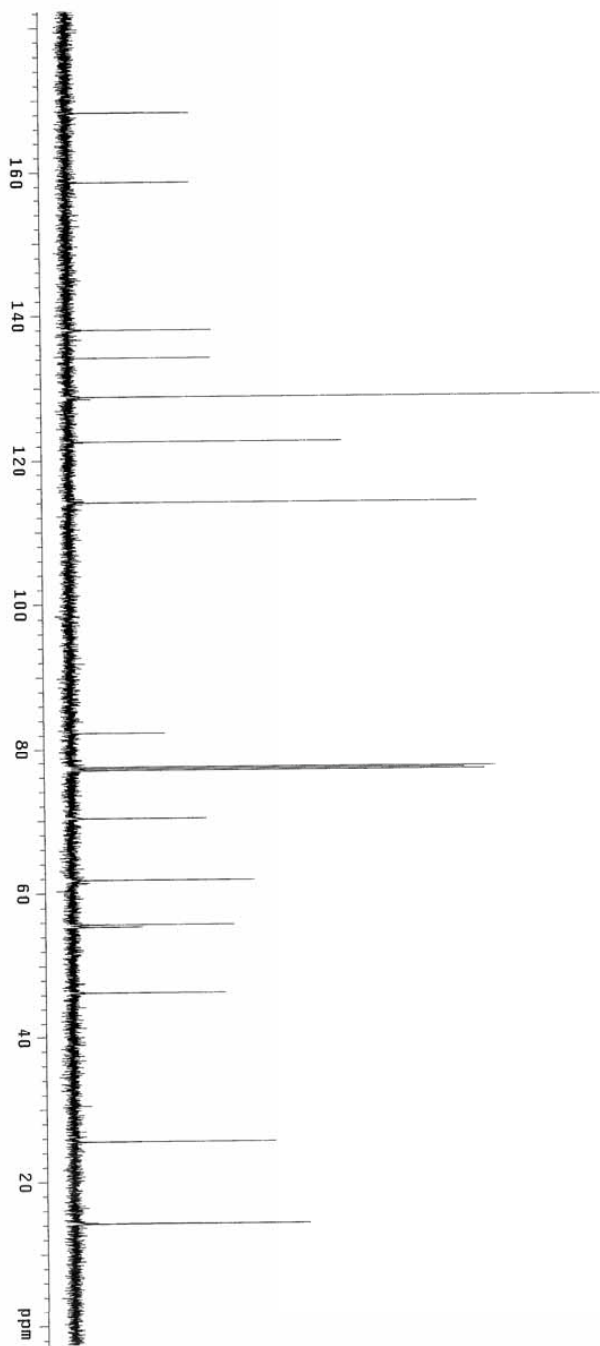



Sample Name: FM-VIII-179  
Data collected on: 1/27/2015 10:00:00 AM  
Archive directory:   
Sample directory:   
Fid file: PROTON  
Pulse Sequence: PROTON (zgpg30)  
Solvent: cdcl3  
Data collected on: Jan 27 2015

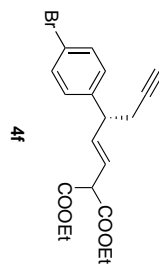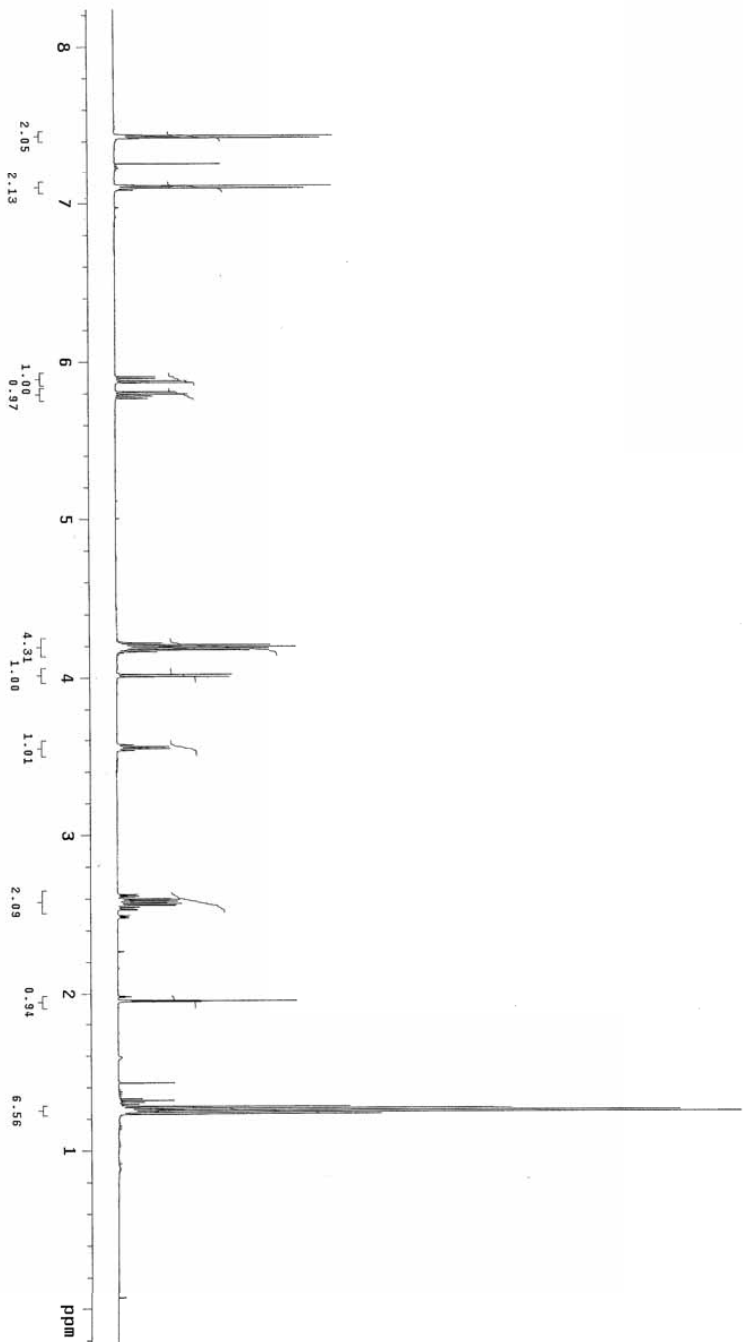

Sample Name: FM-VIII-179  
Data Collected on: mar19-vmr560  
Archive directory:  
Sample directory:  
Fidfile: CARBON  
Pulse Sequence: carbon (szpu1)  
Solvent: cdcl3  
Data collected on: Jan 27 2015

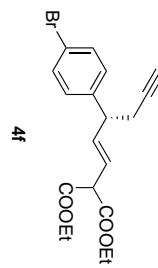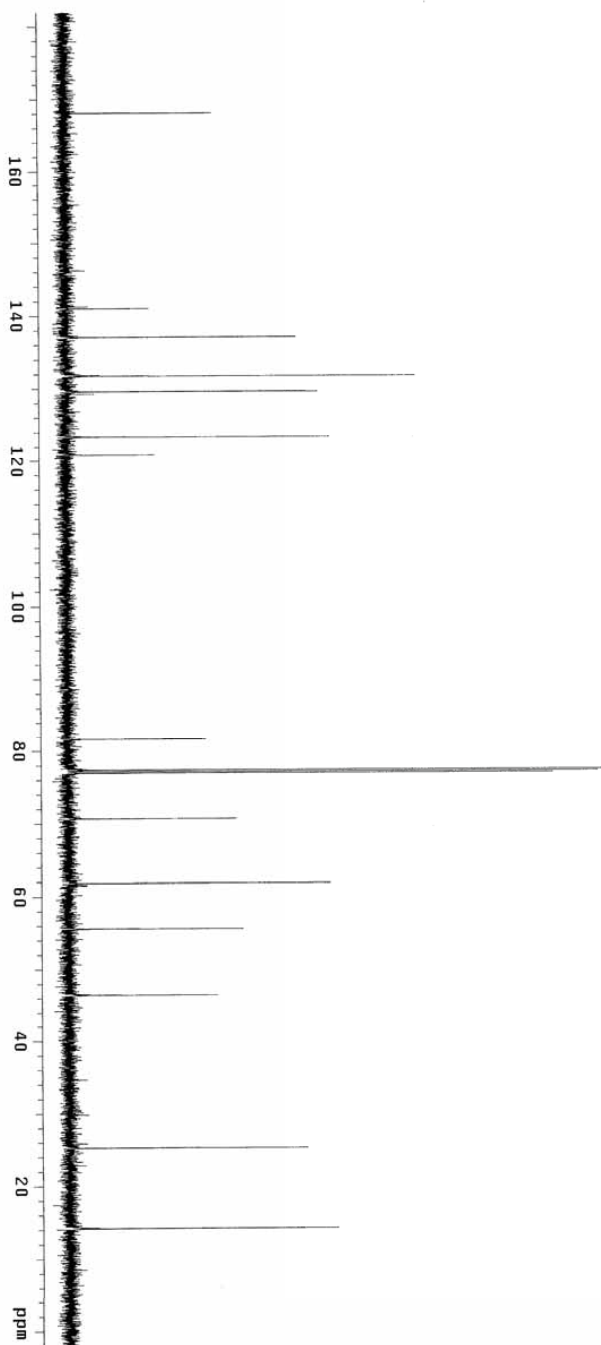

Sample Name: 7  
 File Name: vnmr13-vmr-5400  
 Data Collected on: vnmr13-vmr-5400  
 Archive directory:  
 Sample directory:  
 FID File: PROTON  
 Pulse Sequence: PROTON (szpu1)  
 Date Collected: Feb 19 2015  
 Data collected on: Feb 19 2015

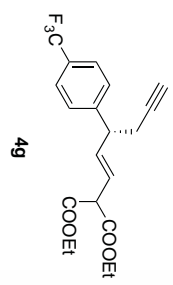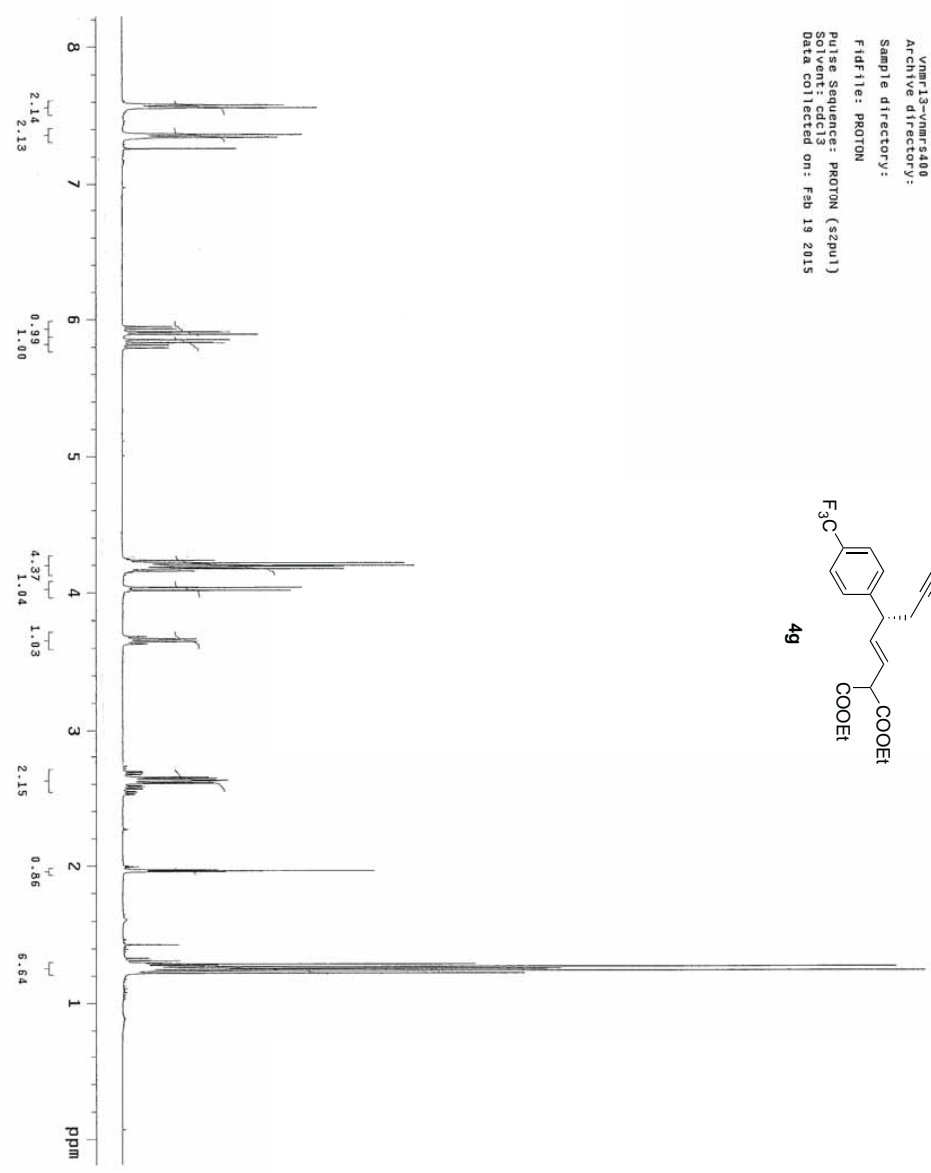

Sample Name: 7-CMNR  
Date Collected on: vnmr13-vnmr-s400  
Archive directory:  
Sample directory:  
Fidfile: FM-VII-187-CMNR  
Pulse Sequence: CARR3H (szpu1)  
Date Collected on: Feb 19 2015

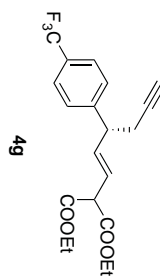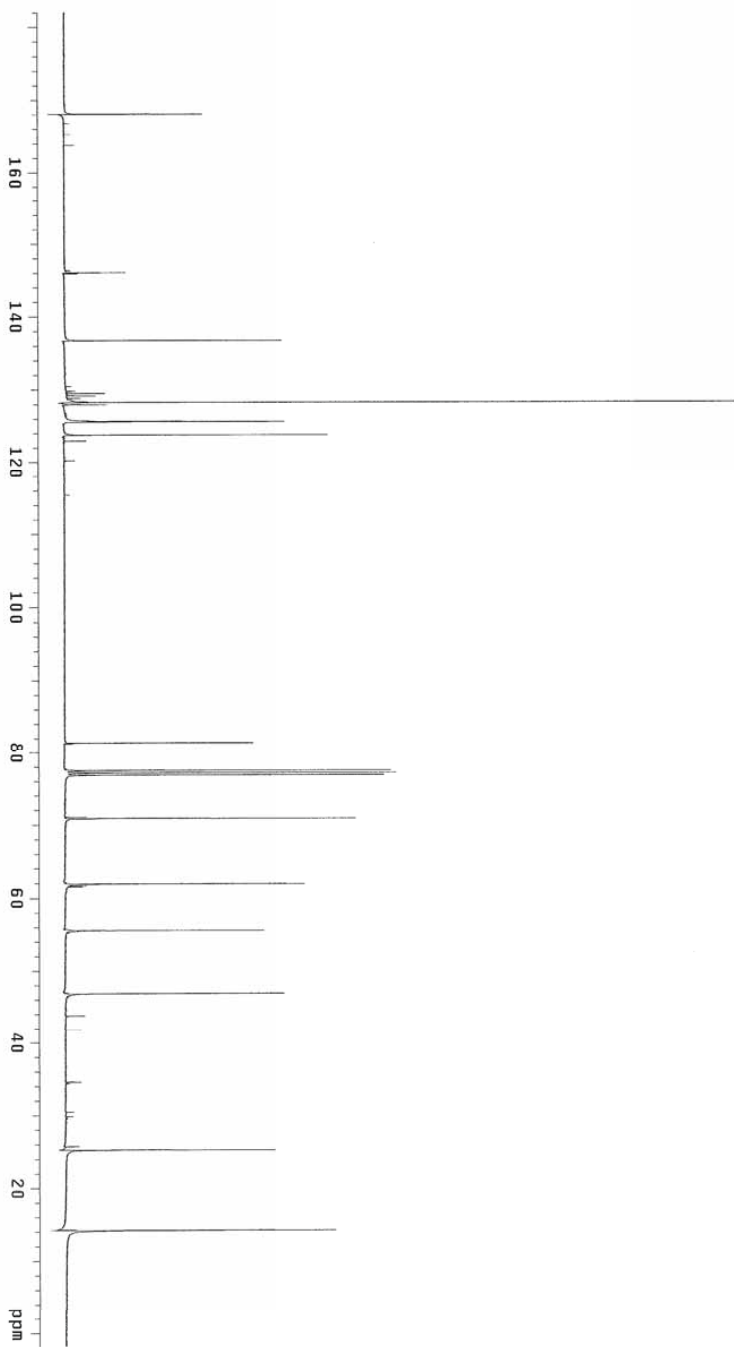

Sample Name: 4h  
Data Collected on: mm-1h-vnmrs400  
Archive directory:  
Sample directory:  
Fidfile: PROTON  
Pulse Sequence: PROTON (szpu1)  
Data collected on: Mar 31 2015

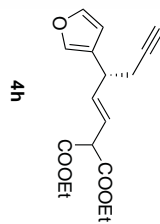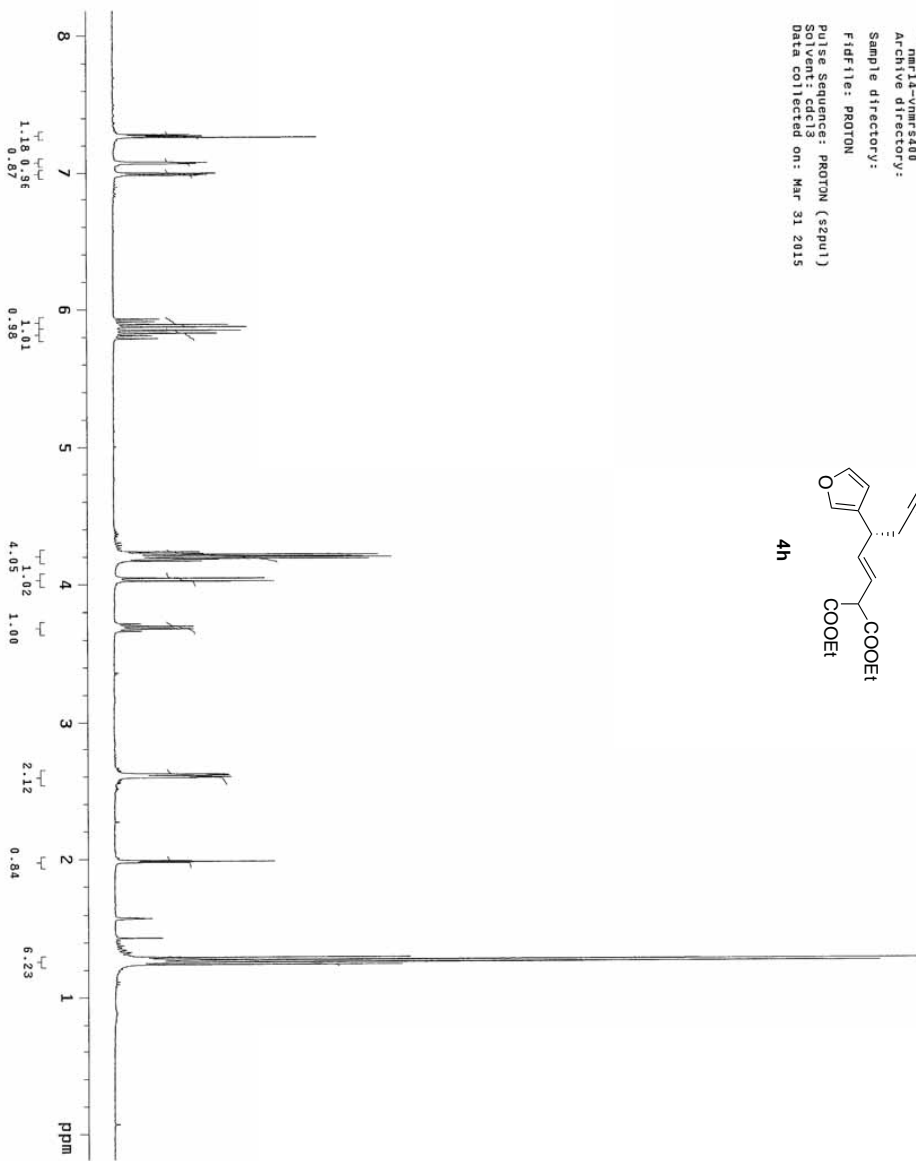

Sample Name: **4h**  
Date Collected on: **mm-19-vmar560**  
Archive directory:  
Sample directory:  
Fidfile: **CARBON**  
Pulse Sequence: **CARBON (szpu)**  
Solvent: **cdcl3**  
Date Collected on: **Mar 31 2015**

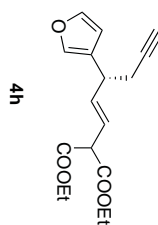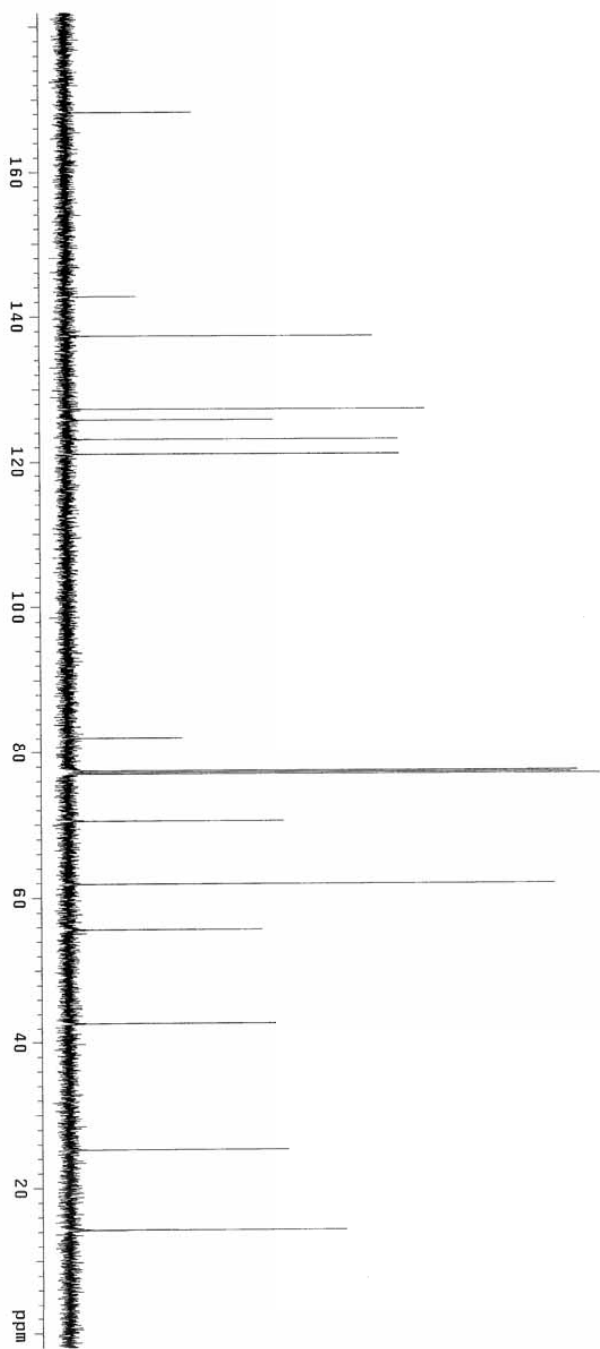

Sample Name: 4i  
Exp: vnmr3-504  
Data Collected on: vnmr3-vmr-s400  
Archive directory:   
Sample directory:   
Fidfile: PROTON  
Pulse Sequence: PROTON (szpu1)  
Date of experiment:   
Date collected on: Mar 18 2015

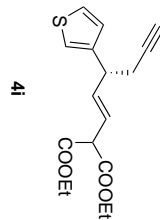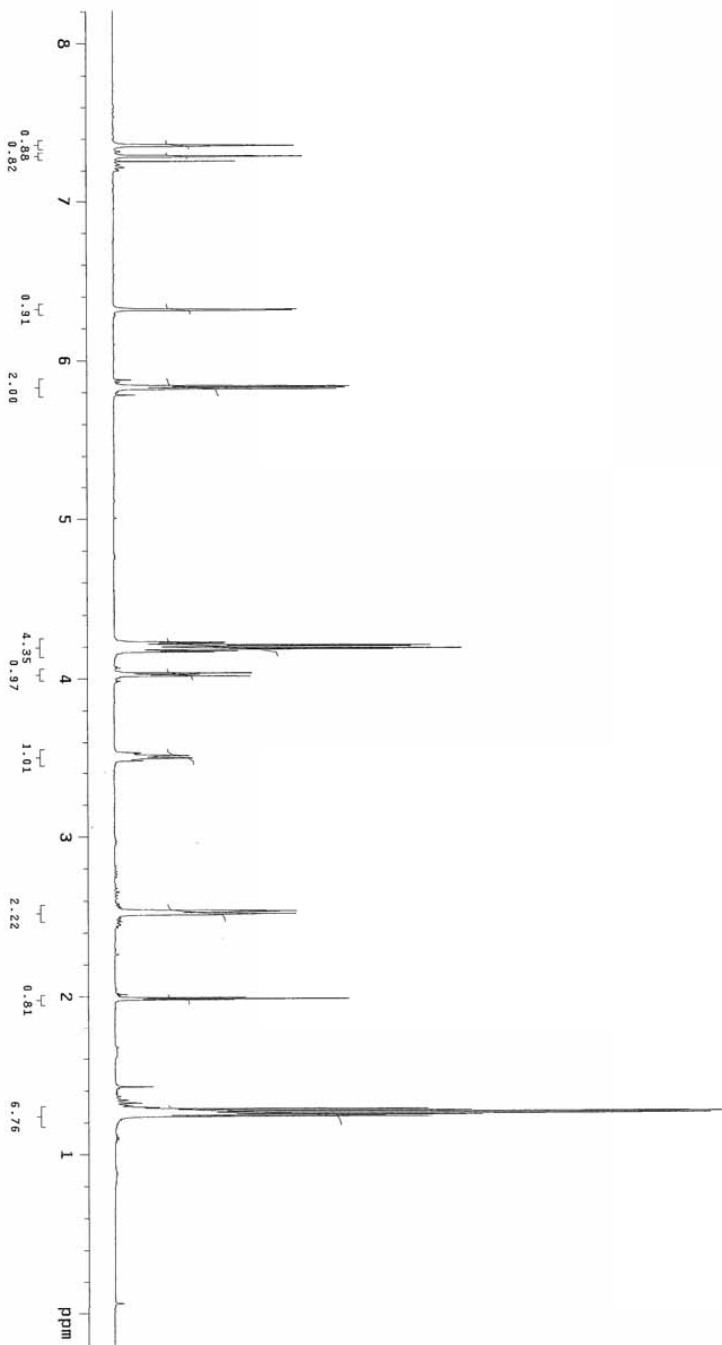

Sample Name: vnmr3-404  
Data Collected on: vnmr3-vnmr3400  
Archive directory:  
Sample directory:  
FIDFile: CARBON  
Pulse Sequence: CARBON (s2pu1)  
Solvent: CDCl3  
Data collected on: Mar 18 2015

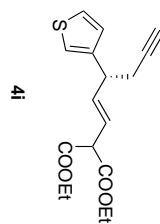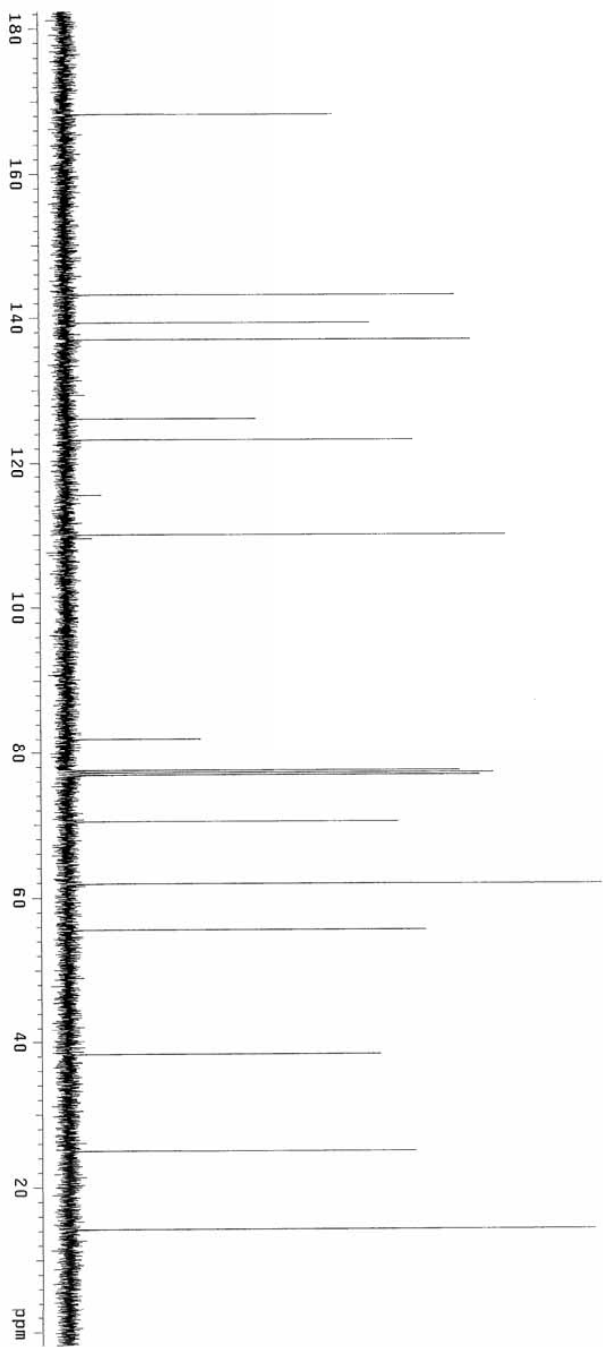



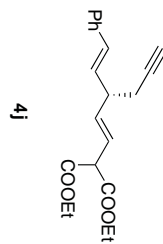

Sample Name: FM-X-172  
Data Collected on: nmr13-vnmrs400  
Archive directory:  
Sample directory:  
FIDFile: PROTON  
Pulse Sequence: PROTON (zgpg3)  
Solvent: cdcl3  
NMR collected on: Jun 9 2016

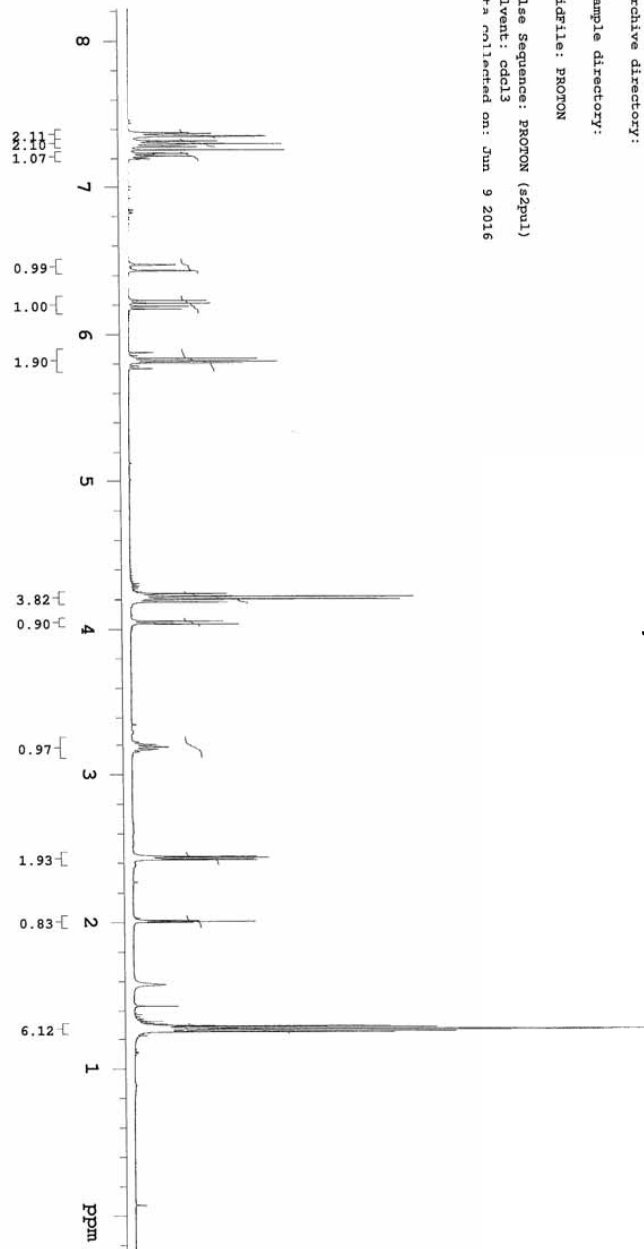

Sample Name:  
M-IX-172  
Data Collected on:  
nmr13-vnmrs400  
Archive directory:  
Sample directory:  
Filefile: CARBON  
Pulse Sequence: CARBON (zgpg1)  
Solvent: cdcl3  
Data collected on: Thu 9 2016

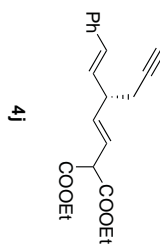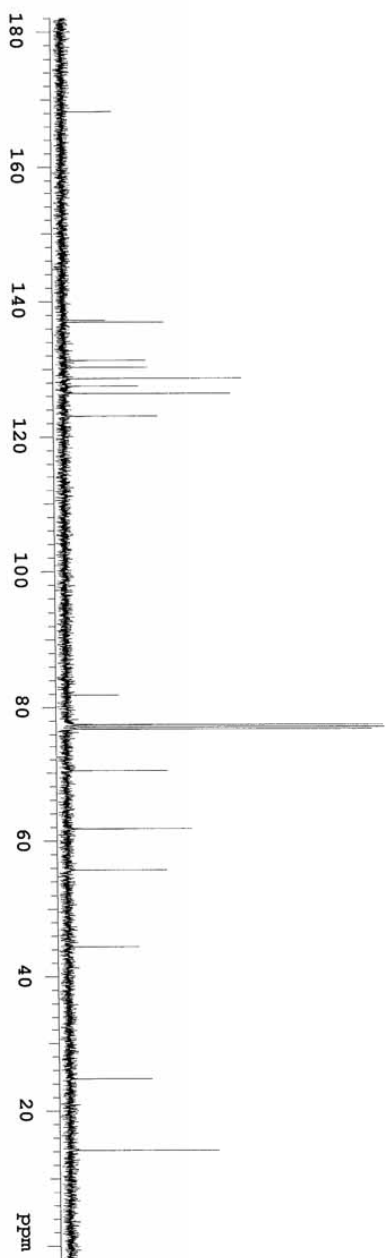

Sample Name: M-VII-288  
 Date: 20150727  
 dm13-vmr340  
 Archive directory:  
 Sample directory:  
 FIDfile: PROTON  
 Pulse Sequence: PROTON (szpu)  
 Solvent: cdcl3  
 Data collected on: Jul 27 2015

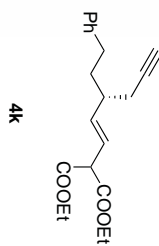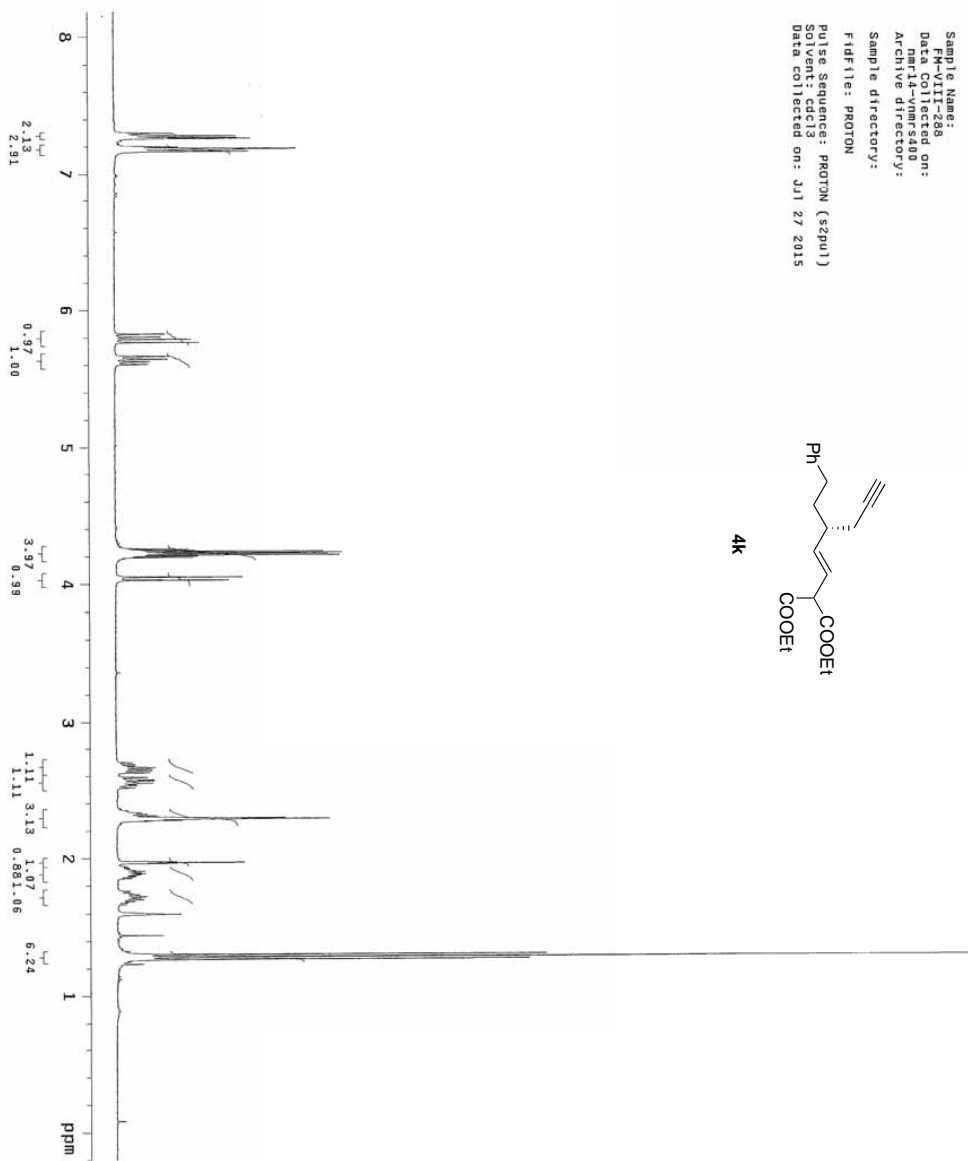

Sample Name: Ph-VII-288  
Date: 2015-07-27  
Data: dm15-vmsr400  
Archive directory:  
Sample directory:  
Fidfile: CARBON  
Pulse Sequence: CARBON (szpu1)  
Solvent: cdcl3  
Data collected on: Jul 27 2015

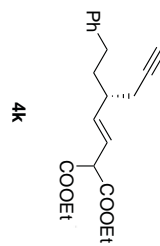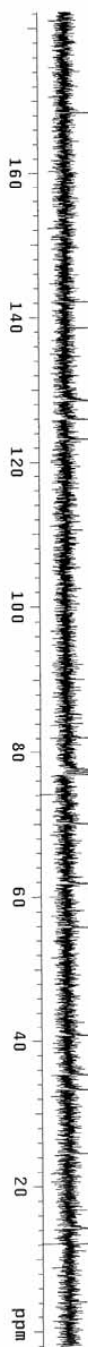

Sample Name: **41**  
Date Collected: **11/23/15**  
nmr14-vnmrs400  
Archive directory:  
Sample directory:  
Fidfile: **PROTON**  
Pulse Sequence: **PROTON (szpu)**  
Solvent: **cdcl3**  
Data collected on: **JUL 27 2015**

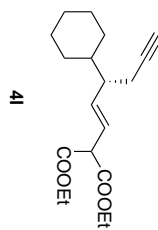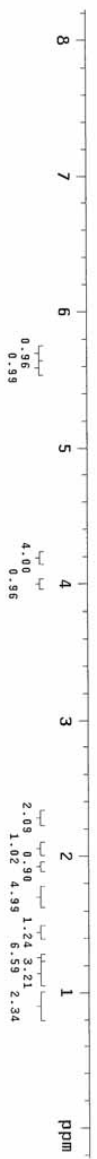

Sample Name: F4-V111-290  
Date Collected on: mm/dd/yyyy  
Archive directory:  
Sample directory:  
Fidfile: CARBON  
Pulse Sequence: CARBON (s2pu1)  
Solvent: cdcl3  
Data collected on: Jul 27 2015

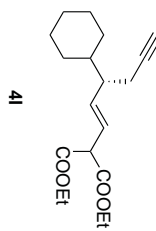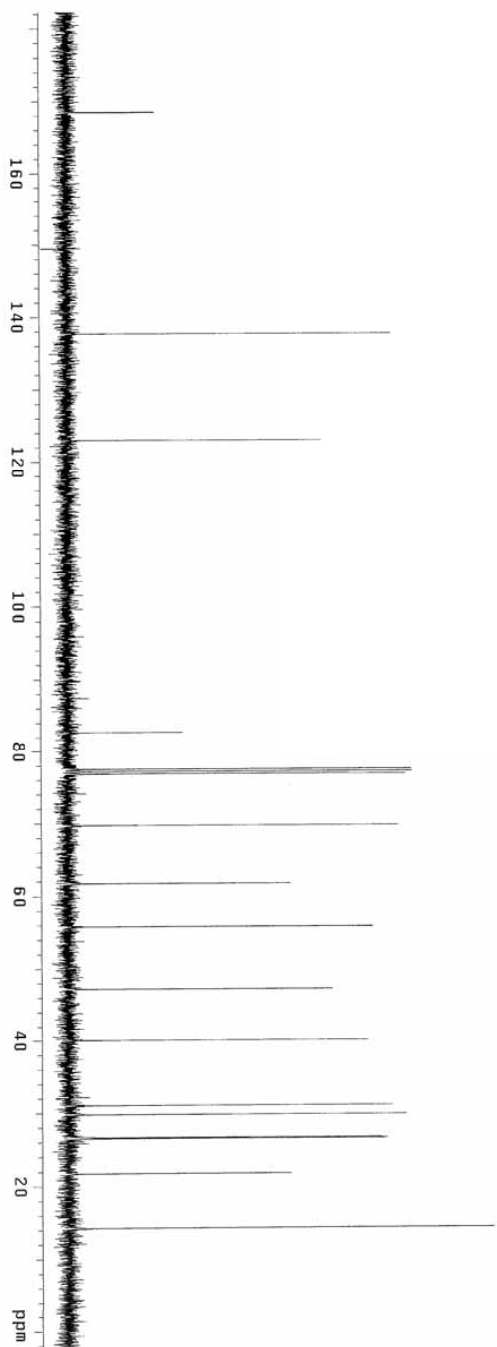

Sample Name: F4-VIII-292  
Date Collected on: 07/27/2015  
Sample Name: am14-vmr640  
Archive directory:  
Sample directory:  
Fidfile: PROTON  
Pulse Sequence: PROTON (s2pu1)  
Solvent: CDCl3  
Data collected on: Jul 27 2015

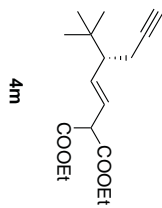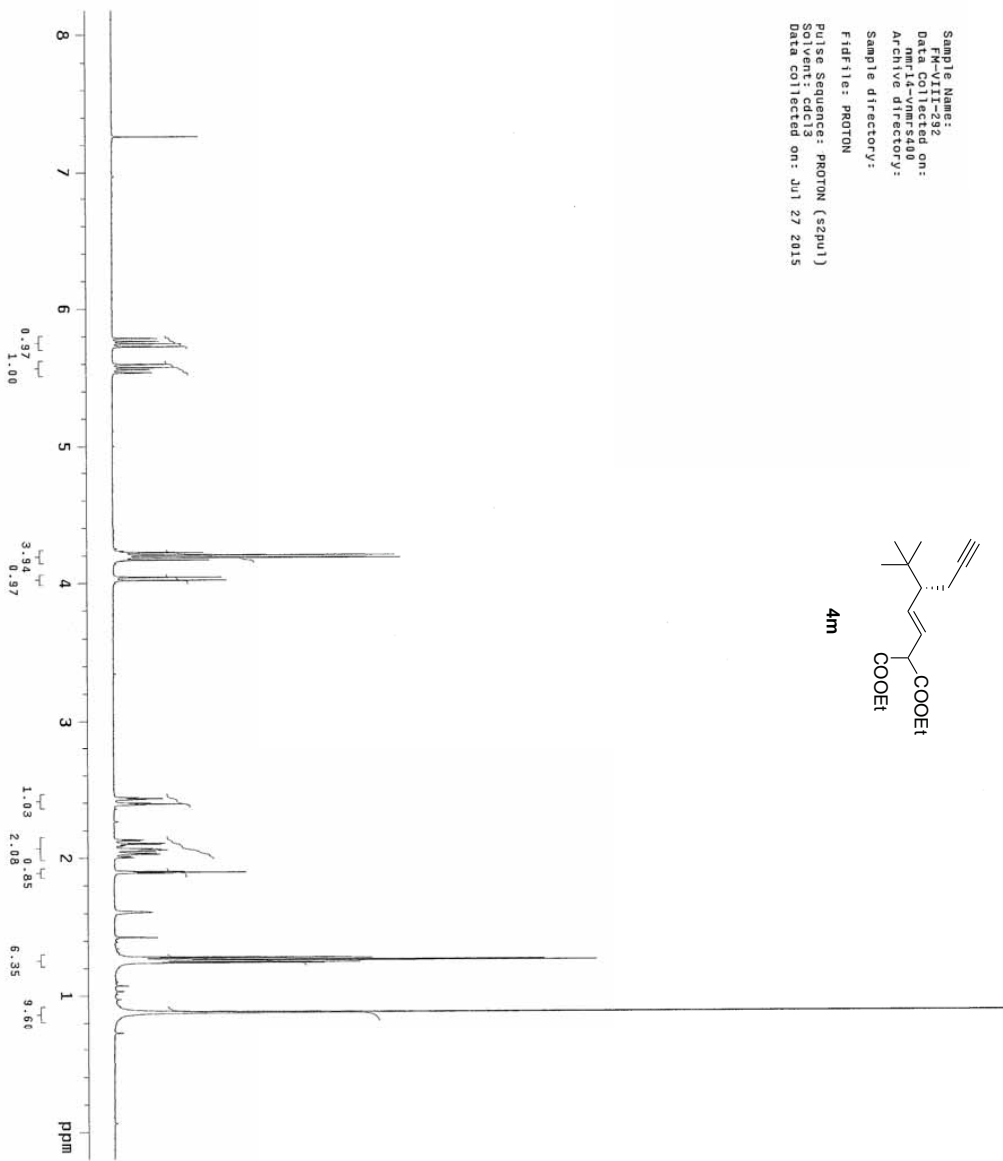

Sample Name:  
M-011-296  
Date Collected on:  
nmr13-vnmrs440  
Archive directory:  
Sample directory:  
Fidfile: CARBON  
Pulse Sequence: CARBON (szpu1)  
Solvent: cdcl3  
Data Collected on: Jul 27 2015

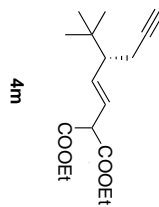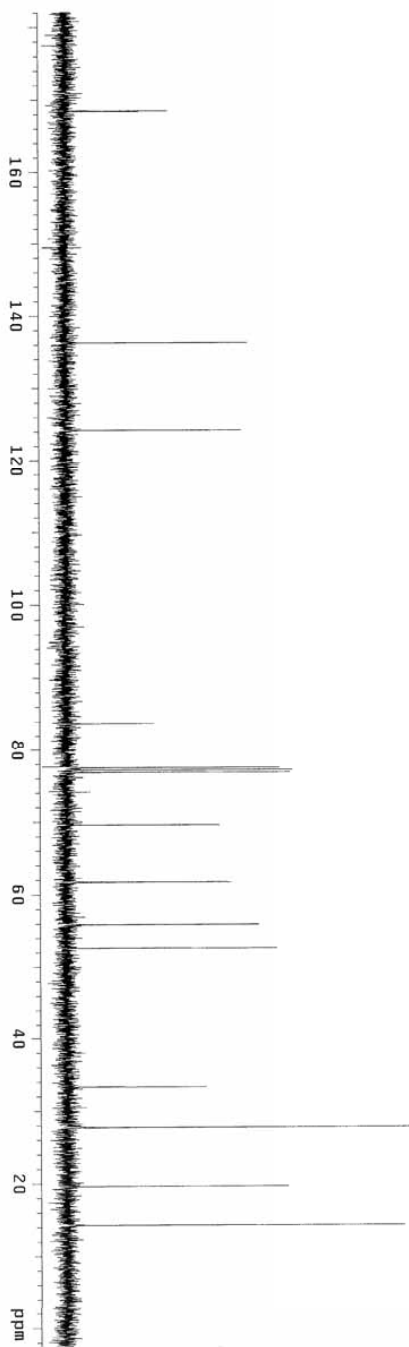



Sample Name: F-011-273  
Dir: /data/2015-01-17/011-273  
Date: 2015-01-17 17:20:15  
Archive directory:  
Sample directory:  
Fidfile: PROTON  
Pulse Sequence: PROTON (zgpg3)  
Solvent: cdcl3  
Data collected on: Jul 17 2015

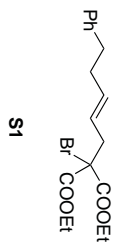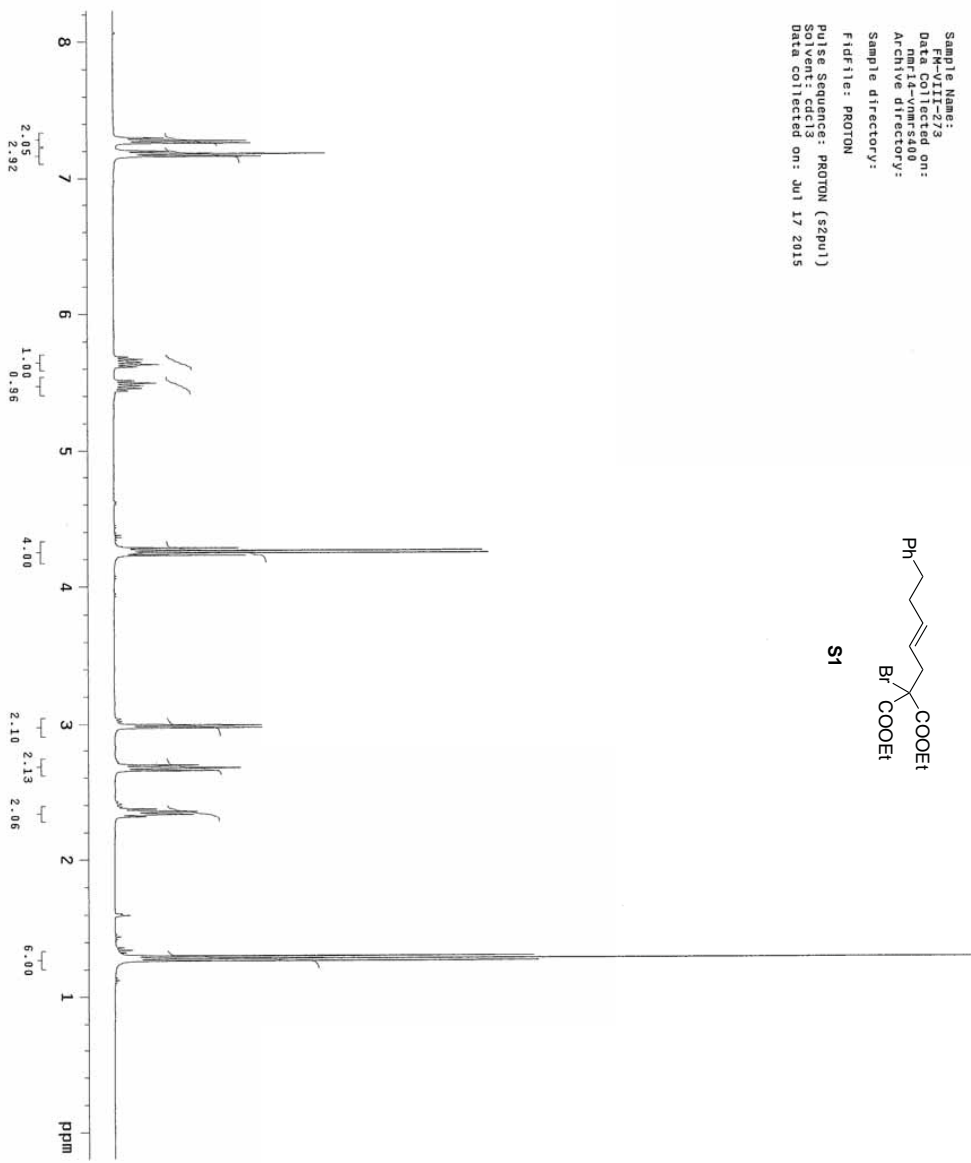

Sample Name: 14-011-273  
Date: 2015-01-14  
Name: 14-011-273  
File: 14-011-273  
Archive directory:   
Sample directory:   
Fidfile: CARBON  
Pulse Sequence: CARBON (szpu1)  
Solvent: cdcl3  
Data collected on: Jul 17 2015

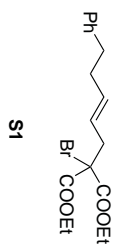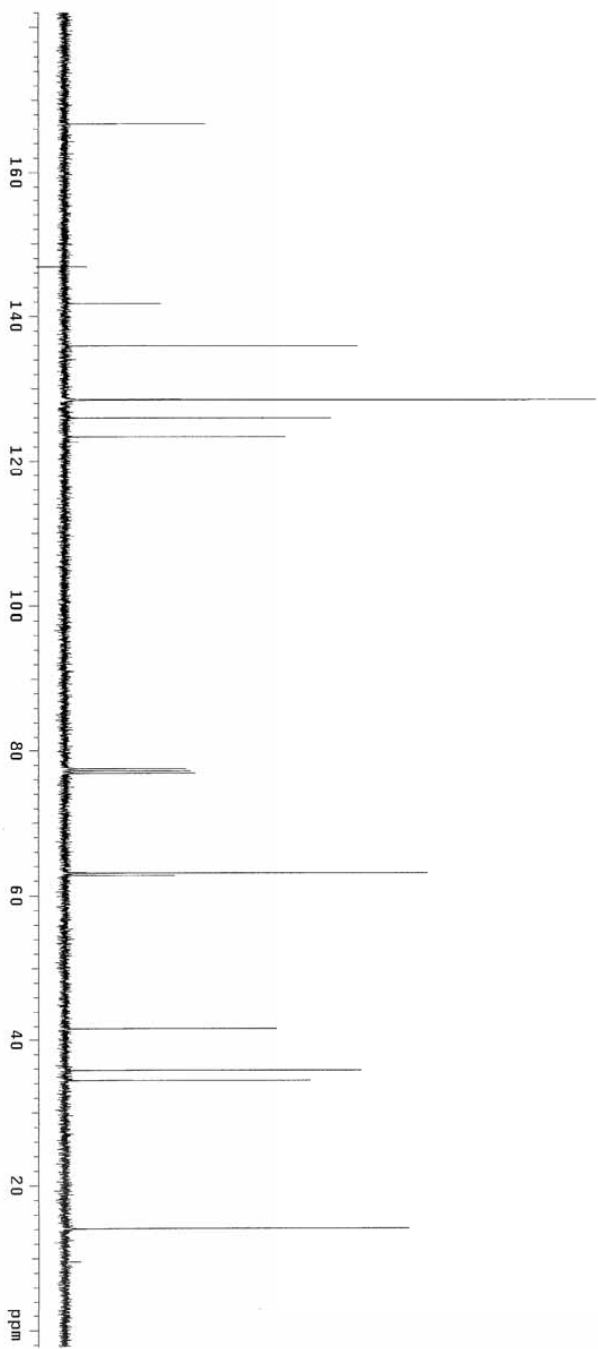

Sample Name: FM-VIII-274  
Data File: fm274.d  
Acquire Date: 07/17/2015  
Archive directory:  
Sample directory:  
Fidfile: PROTON  
Pulse Sequence: PROTON (szpu1)  
Solvent: cdcl3  
Data collected on: Jul 17 2015

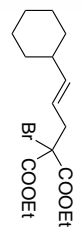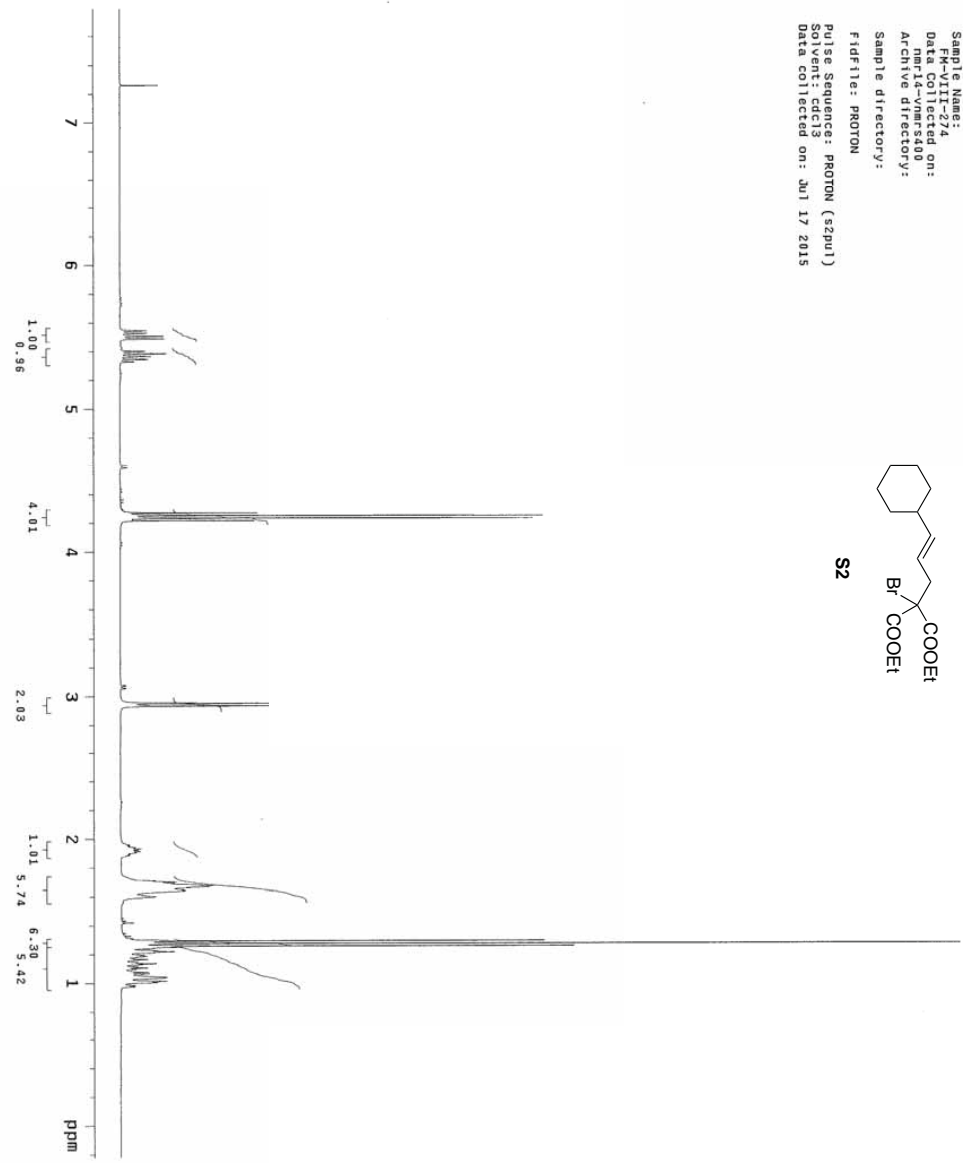

Sample Name: M-VII-24  
Date Collected: 01/17/2015  
nmr13-vnmr340  
Archive directory:  
Sample directory:  
Fidfile: CARBON  
Pulse Sequence: CARBON (szpu1)  
Solvent: cdcl3  
Data collected on: J1 17 2015

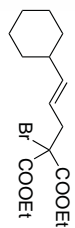

S2

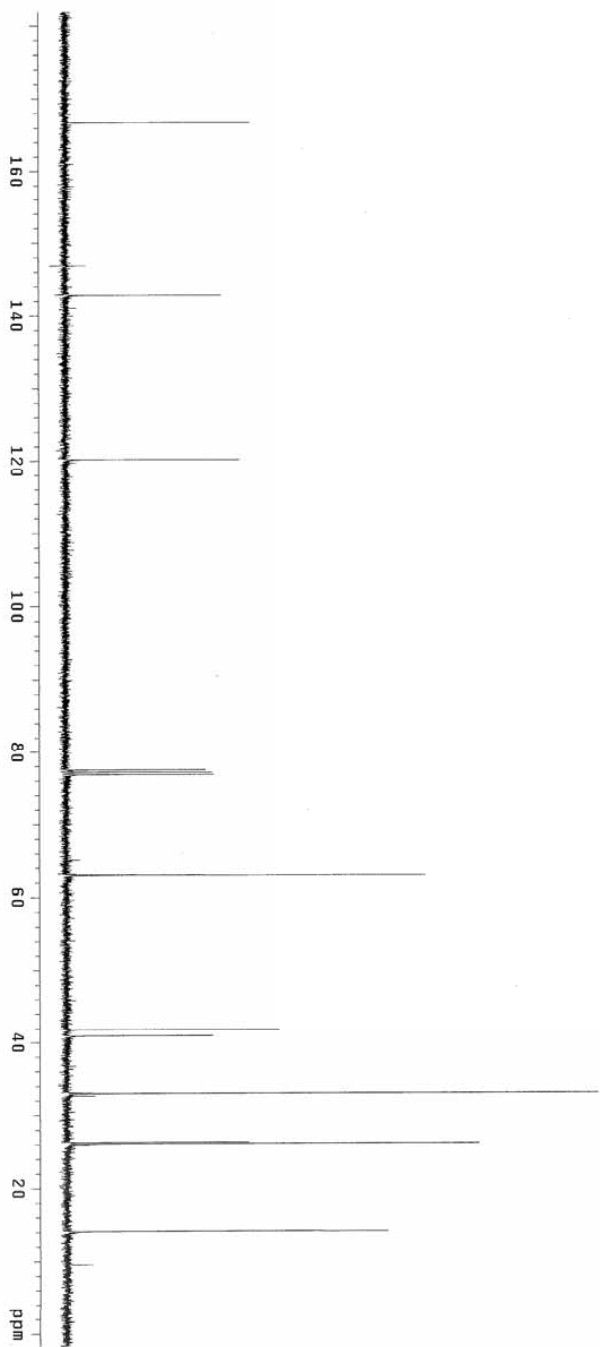

Sample Name: PM-VII-277  
Data collected on: pmr14-vmr340  
Archive directory:  
Sample directory:  
Fidfile: PROTON  
Pulse Sequence: PROTON (szpu1)  
Solvent: cdcl3  
Data collected on: Jul 17 2015

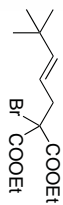

S3

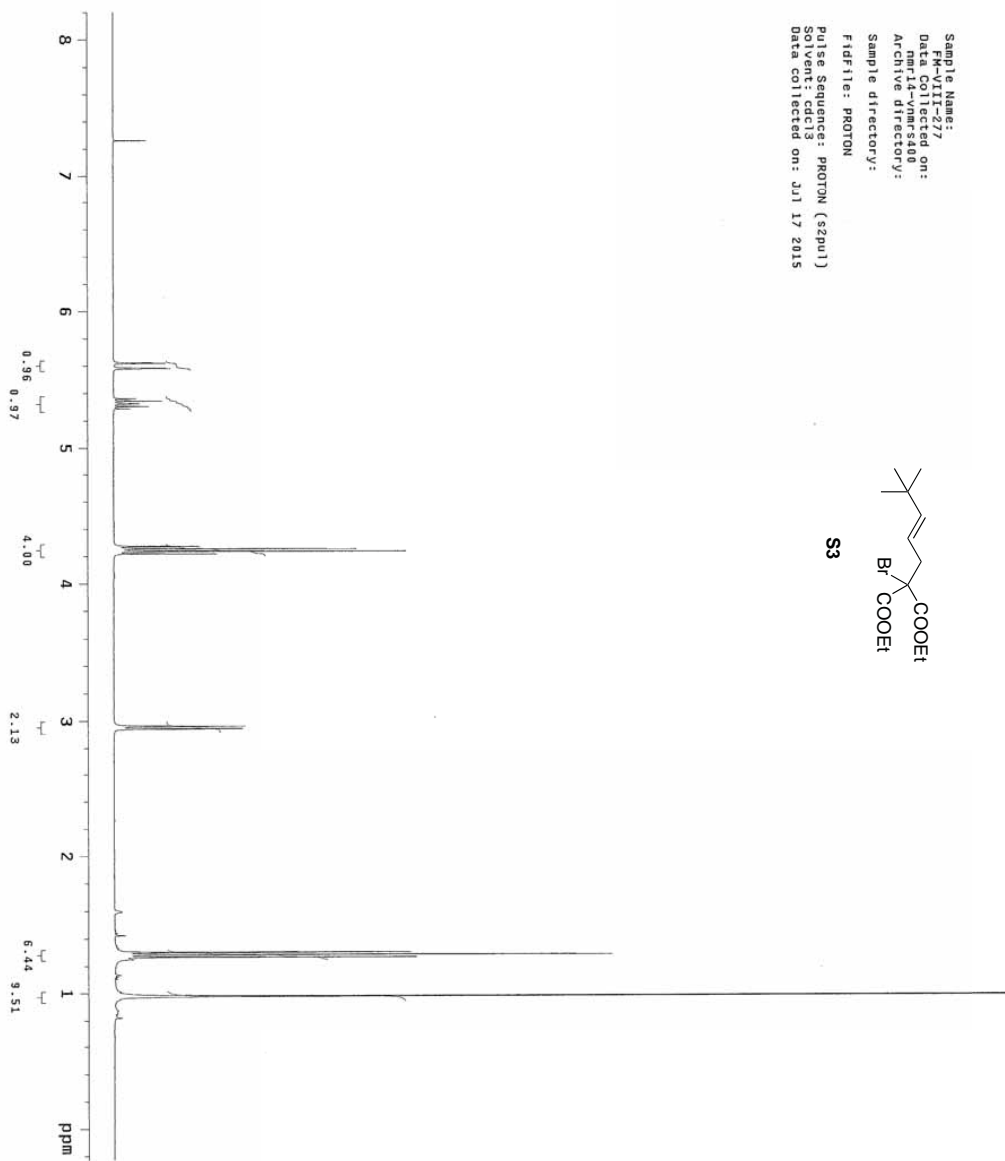

Sample Name: M-011-27  
Date Collected on: mm-13-ymrs40  
Archive directory:  
Sample directory:  
Fidfile: CARBON  
Pulse Sequence: CARBON (szpu1)  
Solvent: cdcl3  
Data collected on: Jul 17 2015

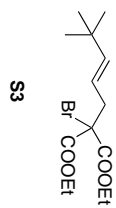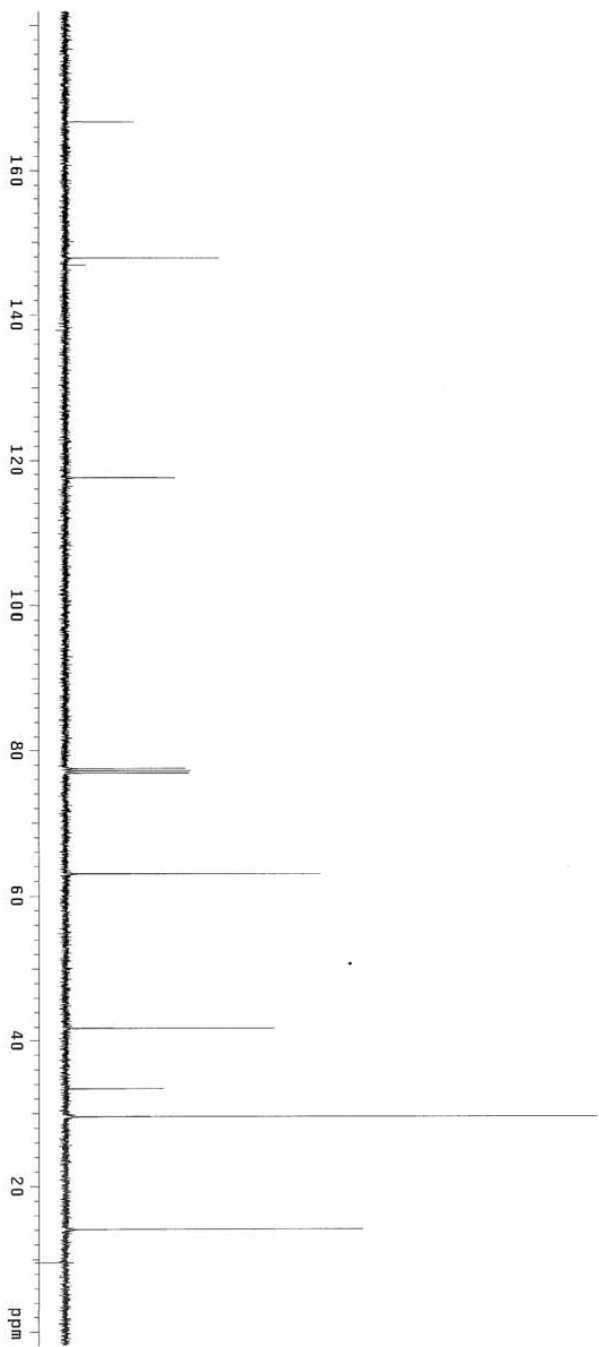

Sample Name: FM-VIII-282  
Data Collected on: mm-1d-vnmrs400  
Archive directory:  
Sample directory:  
File: FM-VIII-282  
Pulse Sequence: PROTON (szpu1)  
Solvent: CDCl3  
Data collected on: Jul 20 2015

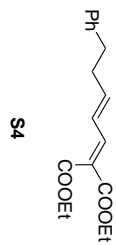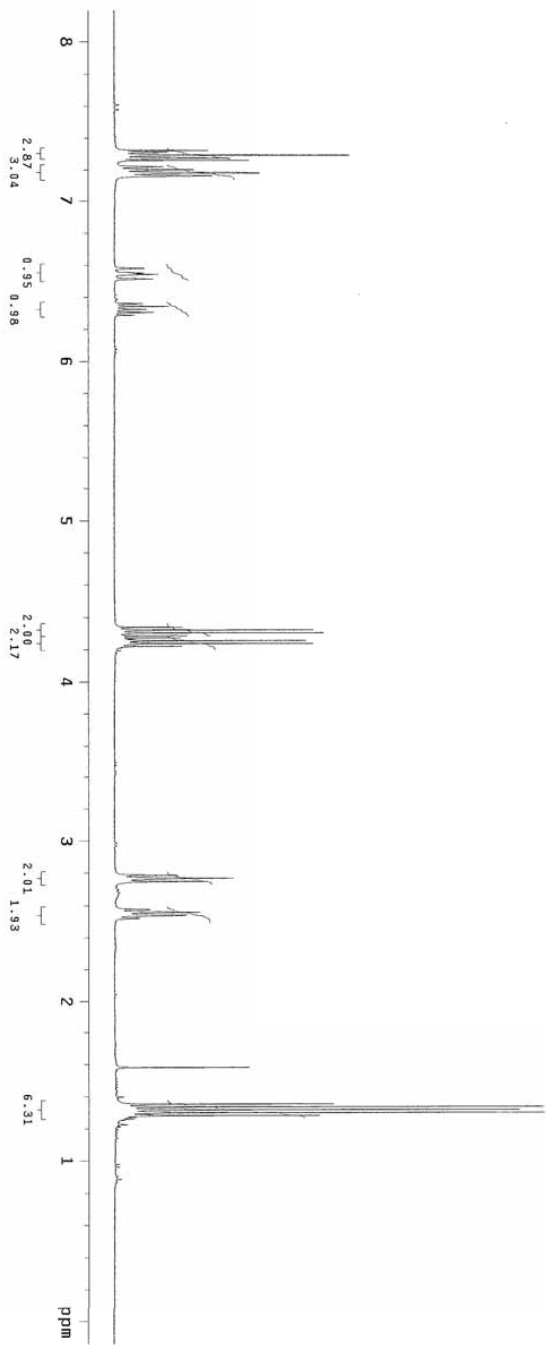

Sample Name: PM-VIII-582  
Data Collected on: mm-14-vnmr5400  
Archive directory:  
Sample directory:  
Fidfile: CARBON  
Pulse Sequence: CARBON (s2pu1)  
Solvent: cdcl3  
Data collected on: Jul 20 2015

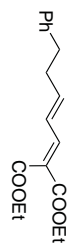

S4

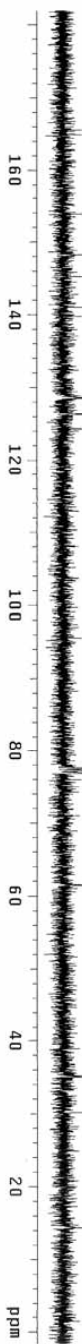



Sample Name: **55**  
File: **55**  
Data Collected on: **nmr14-vnmr5400**  
Archive directory:  
Sample directory:  
F1 file: **PROTON**  
Pulse Sequence: **PROTON (szpu1)**  
Solvent:  
Data collected on: **Jul 20 2015**

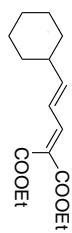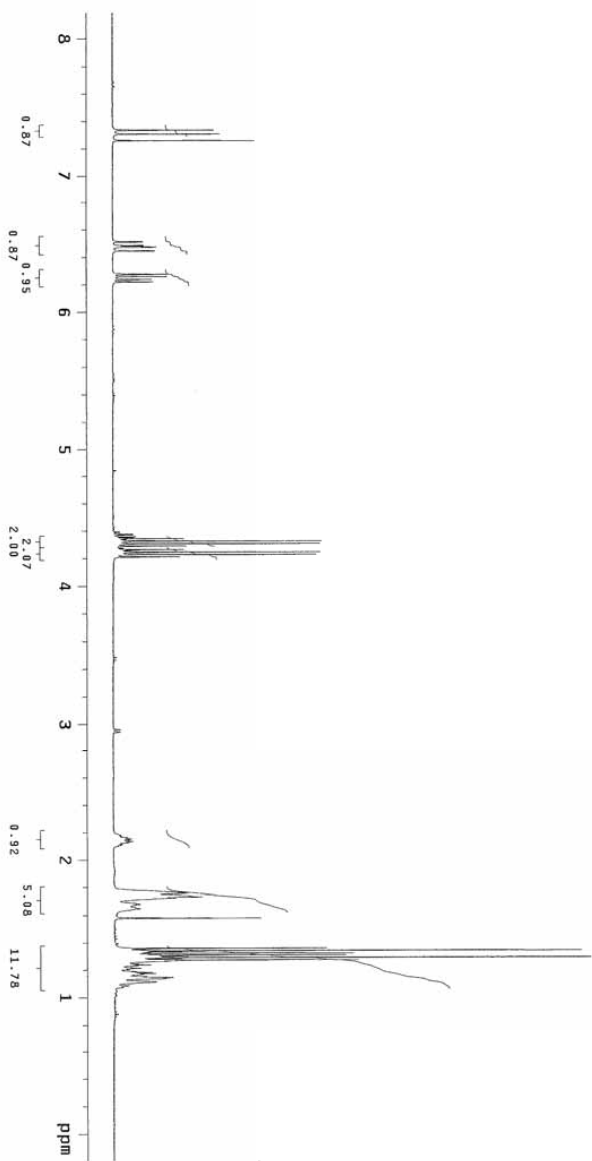

Sample Name: EM-VII-283  
Data collected on: nm-1d-ymms480  
Archive directory: Sample directory:  
Sample directory:  
Fidfile: CARBON  
Pulse Sequence: CARBON (szpu1)  
Solvent: cdcl3  
Data collected on: Jul 20 2015

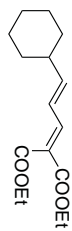

S5

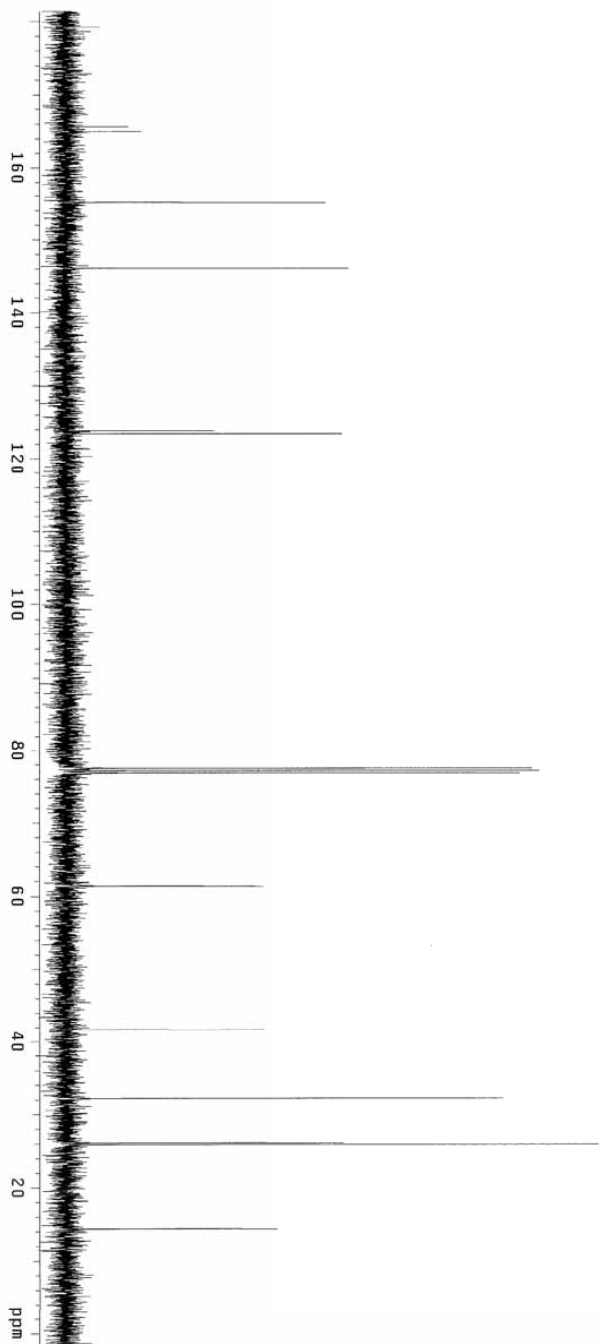

Sample Name: FM-VII-284  
Data Collected on: nm-14-vnmrs400  
Archive directory:  
Sample directory:  
Fidfile: PROTON  
Pulse Sequence: PROTON (szpu1)  
Solvent: cdcl3  
Data collected on: Jul 20 2015

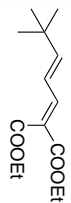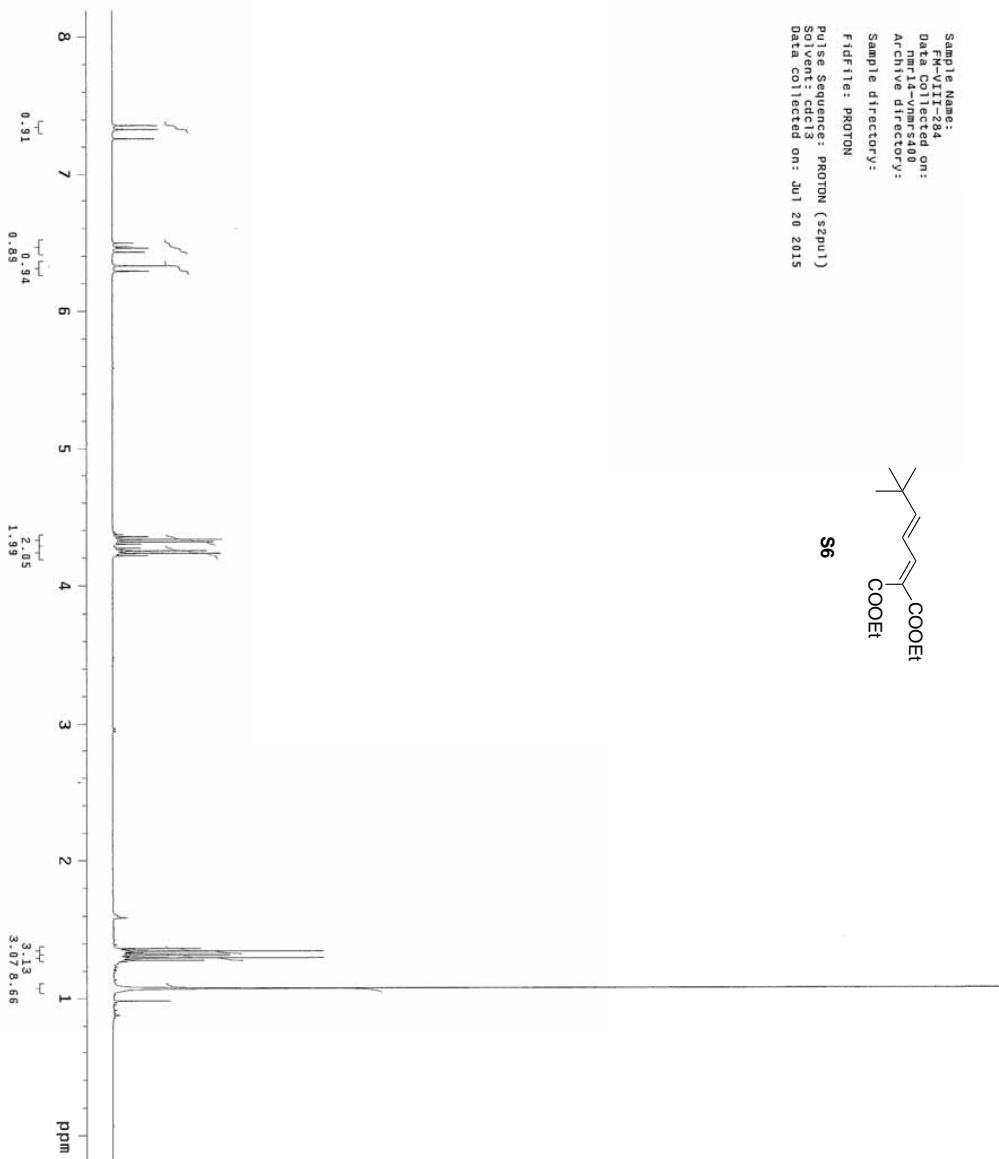

Sample Name: 14-1-14  
File Name: 14-1-14  
Data Collected on: mm-14-vnmrs400  
Archive directory:  
Sample directory:  
F1 file: CARBON  
Pulse Sequence: CARBON (szpu1)  
Date Collected: 20150720  
Data collected on: Jul 20 2015

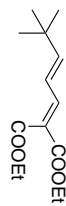

S6

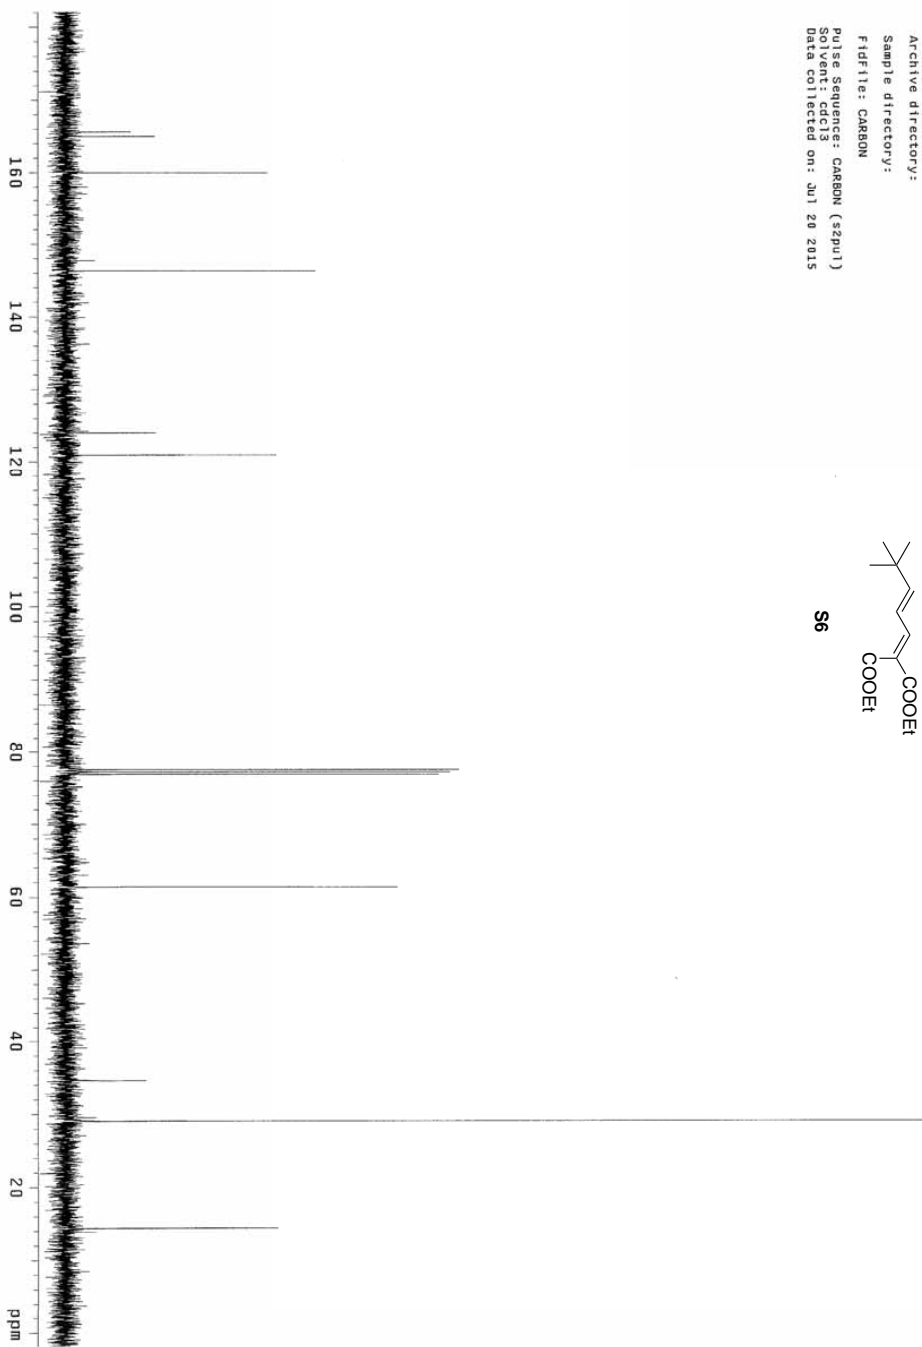

Sample Name: 2  
Data Collected on: mm-1d-vnmr5400  
Archive directory:  
Sample directory:  
Fidfile: PROTON  
Pulse Sequence: PROTON (szput)  
Data Collected on: Aug 12 2015

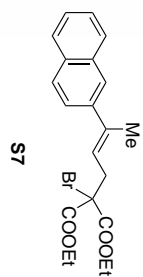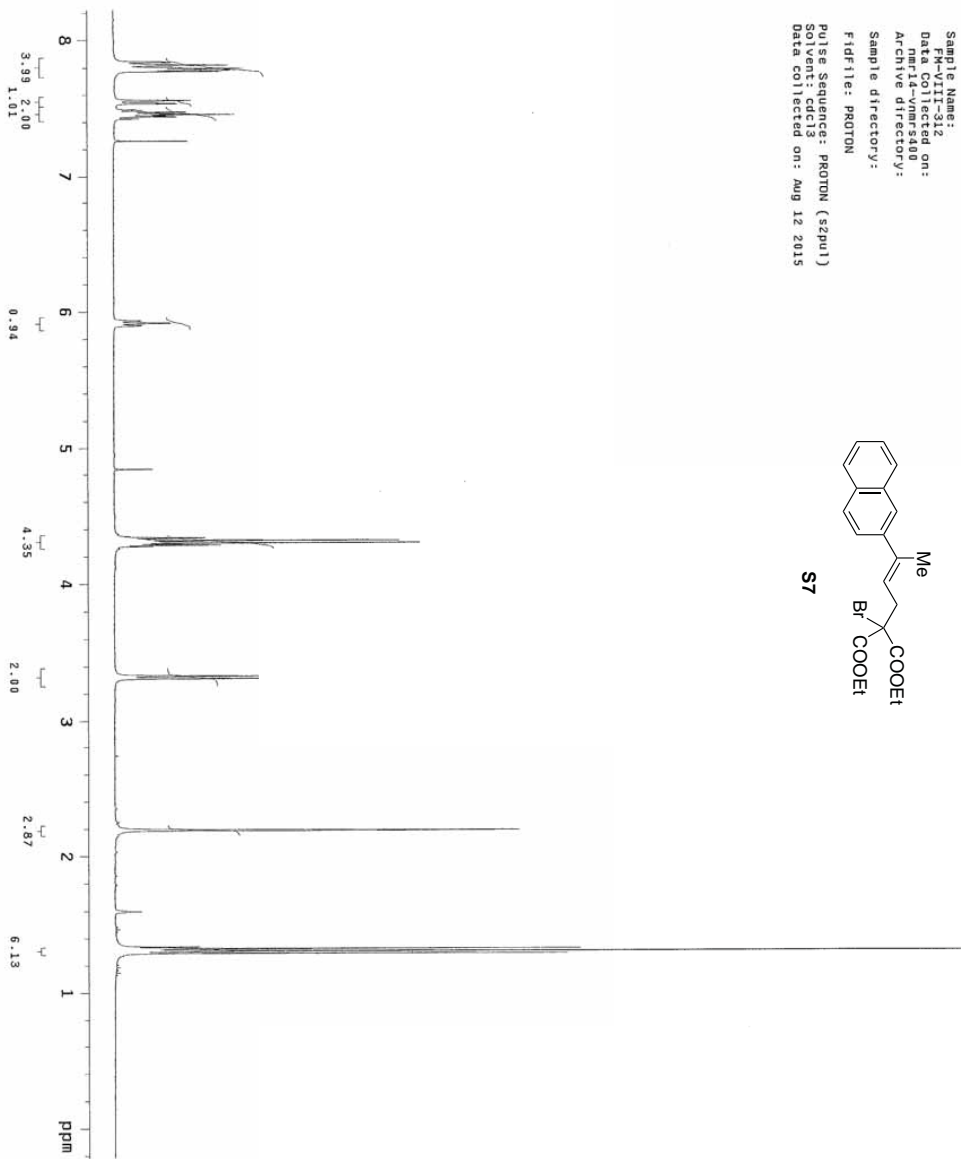

Sample Name: 2  
Date Collected on: mm-13-vnmrs480  
Archive directory:  
Sample directory:  
Fidfile: CARBON  
Pulse Sequence: CARBON (szpu1)  
Solvent: cdcl3  
Data collected on: Aug 12 2015

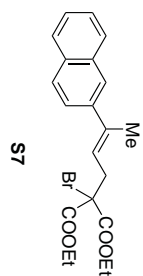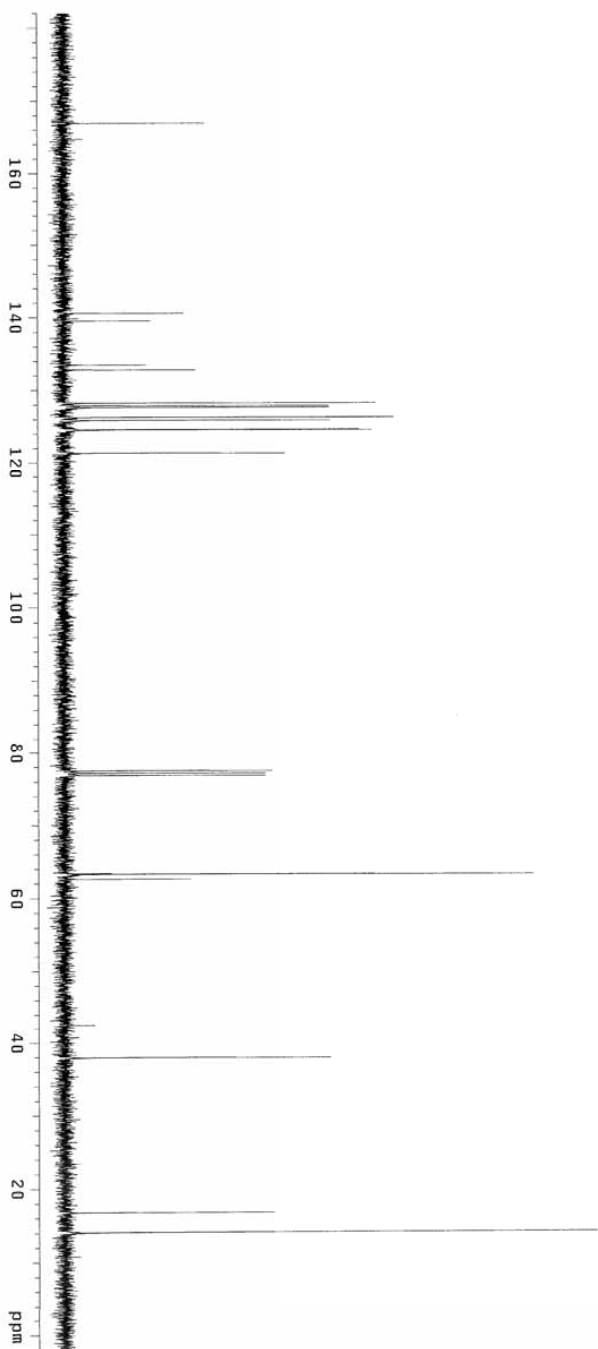

Sample Name: FW-IX-19  
Data Collected on: vnmr13-vnmr400  
Archive directory:  
Sample directory:  
Fidfile: PROTON  
Pulse Sequence: PROTON (zgpg3)  
Solvent: cdcl3  
Data collected on: Aug 24 2015

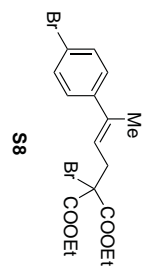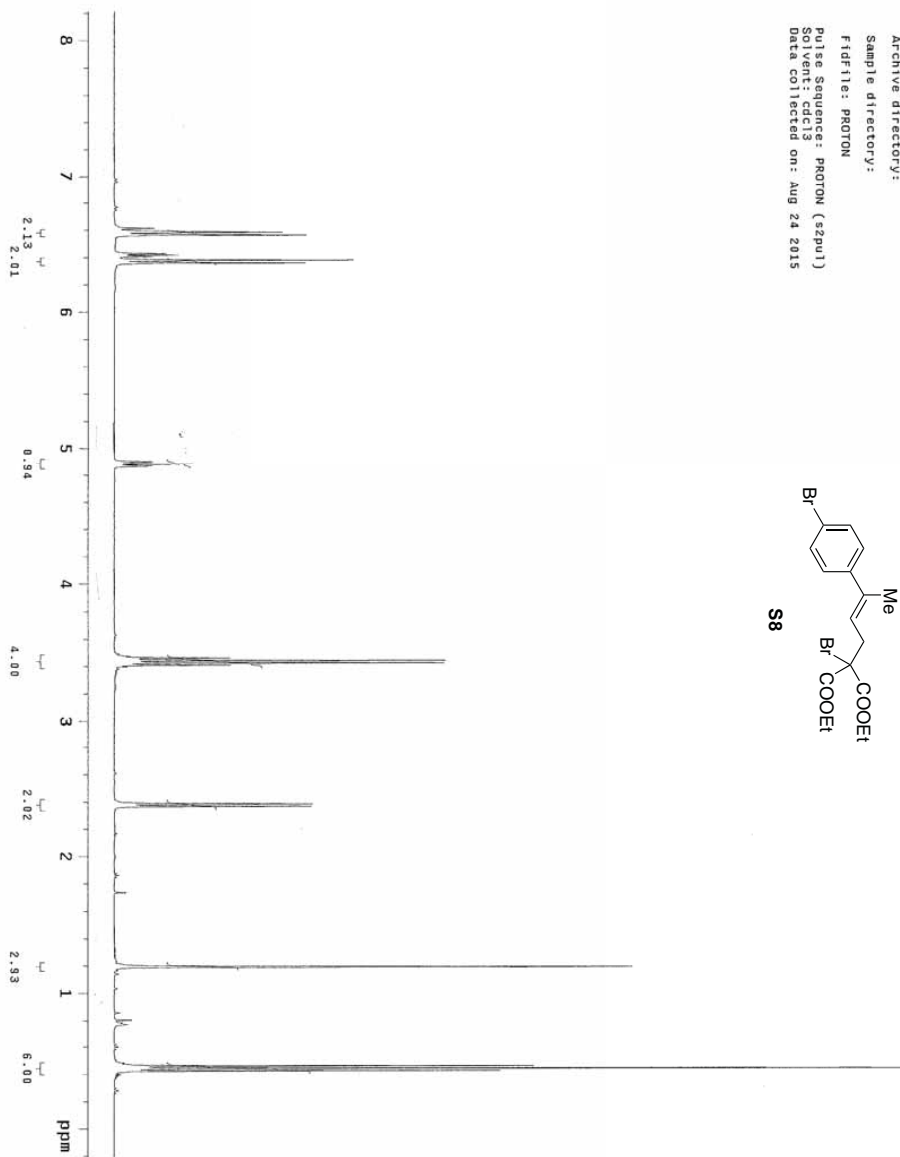

Sample Name: FM-IX-19  
Data Collected on: vnmr13-vnmr3480  
Archive directory:  
Sample directory:  
F1df-file: CARBON  
Pulse Sequence: CARBON (zgpg1)  
Solvent: CDCl3  
Data collected on: Aug 24 2015

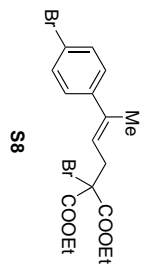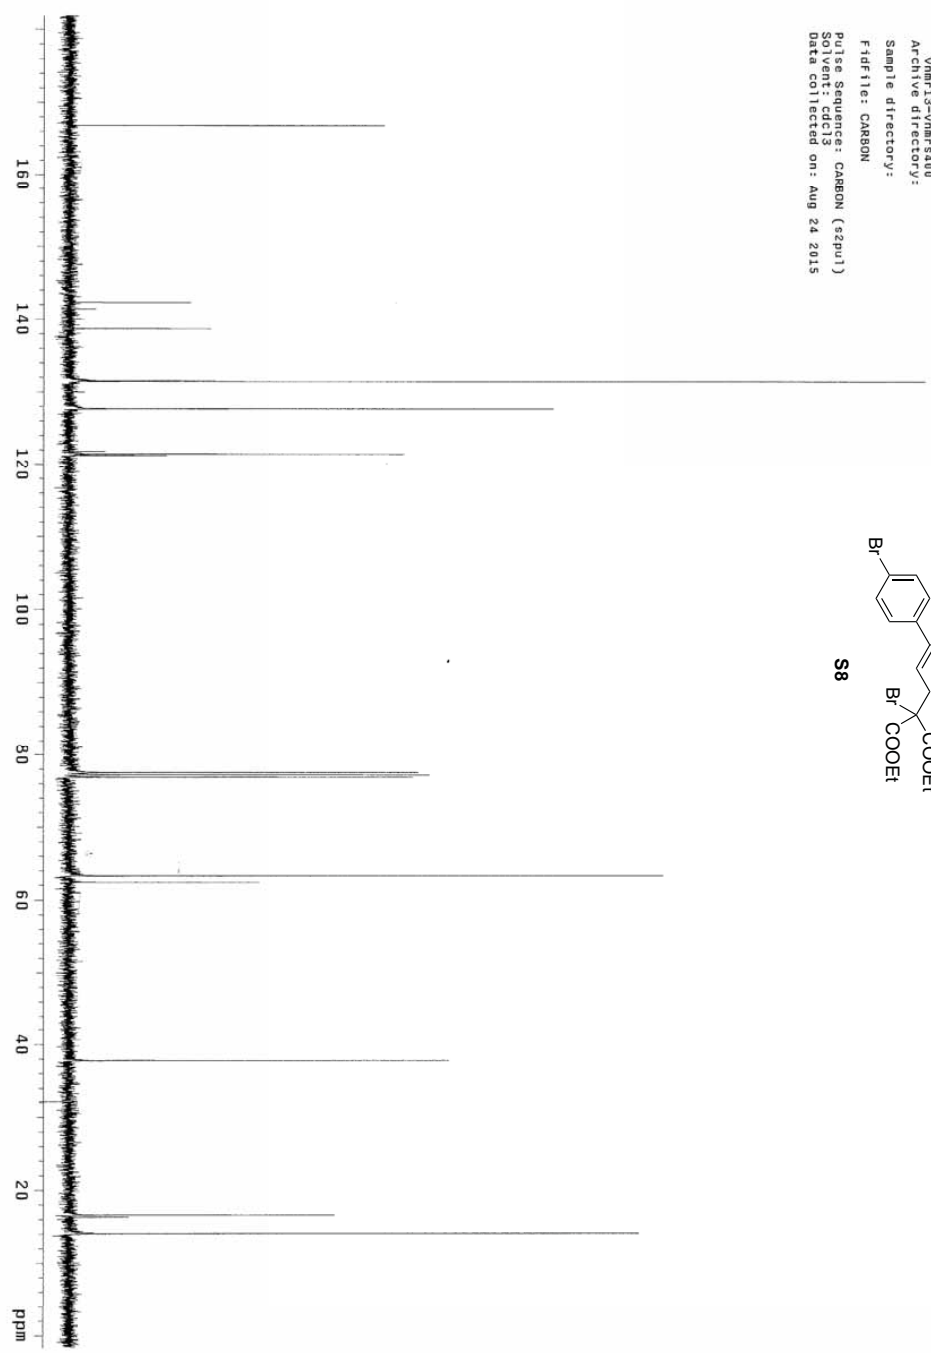



Sample Name: 13  
Date Collected: 08/10/2015  
nmr-1a-vnmrs400  
Archive directory:  
Sample directory:  
Fidfile: PROTON  
Pulse Sequence: PROTON (szpu1)  
Date Collected on: Aug 10 2015

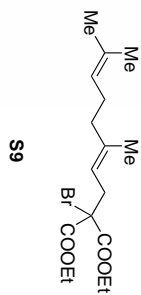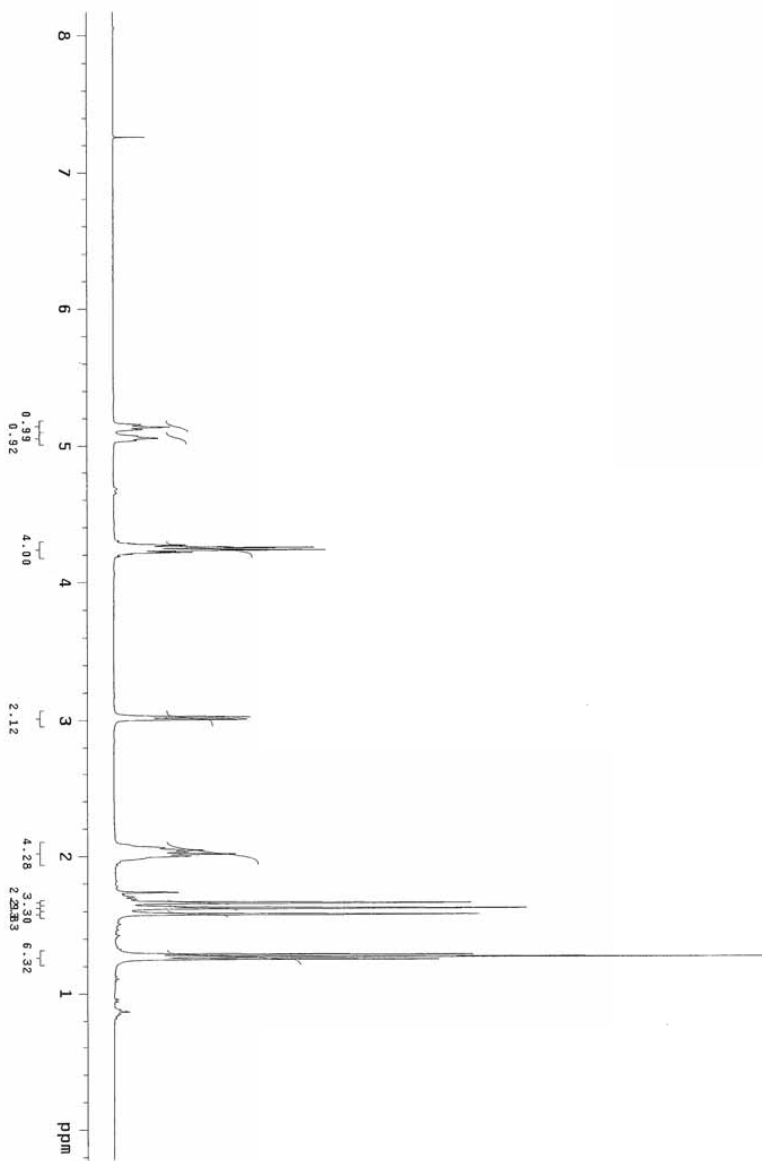

Sample Name: 14-1-1  
Data Collected on: nmr-14-vnmrs480  
Archive directory:   
Sample directory:   
Fidfile: CARBON  
Pulse Sequence: CARBON (szpu1)  
Date collected on: Aug 10 2015

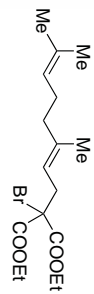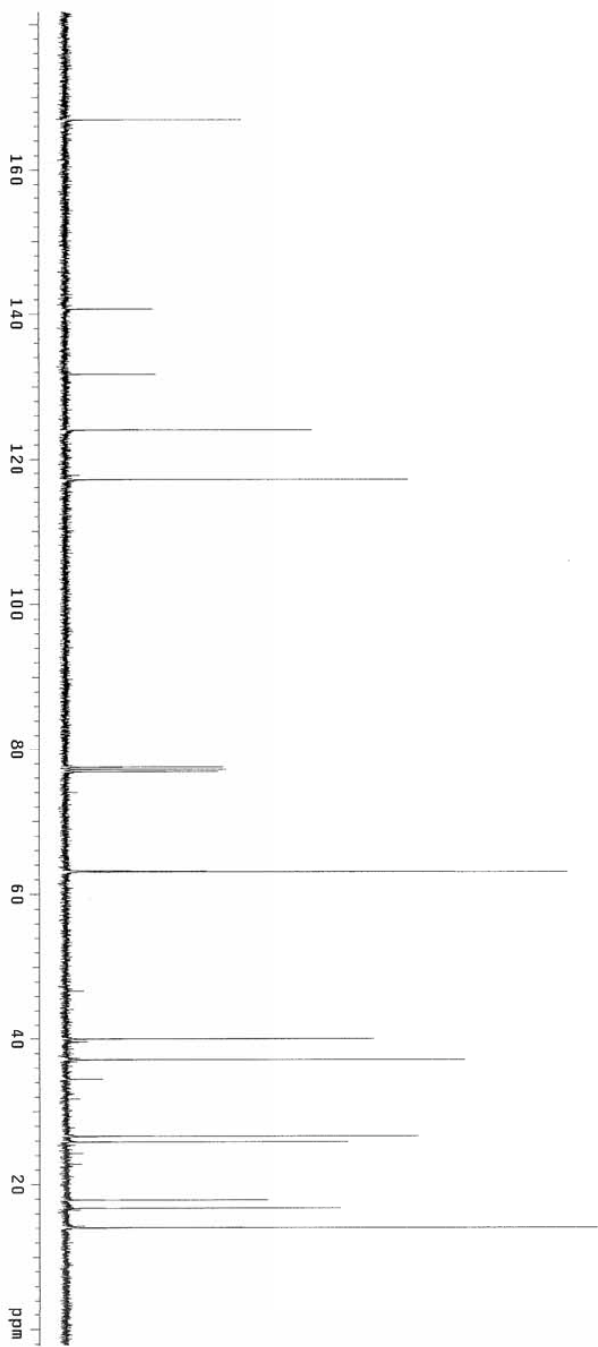

Sample Name:  
Date Collected on:  
vnmr13-vnmr5400  
Archive directory:  
Sample directory:  
Fidfiles: PROTON  
Pulse Sequence: PROTON (szpu1)  
Solvent: CDCl3  
Data Collected on: Aug 13 2015

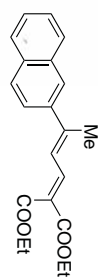

S10

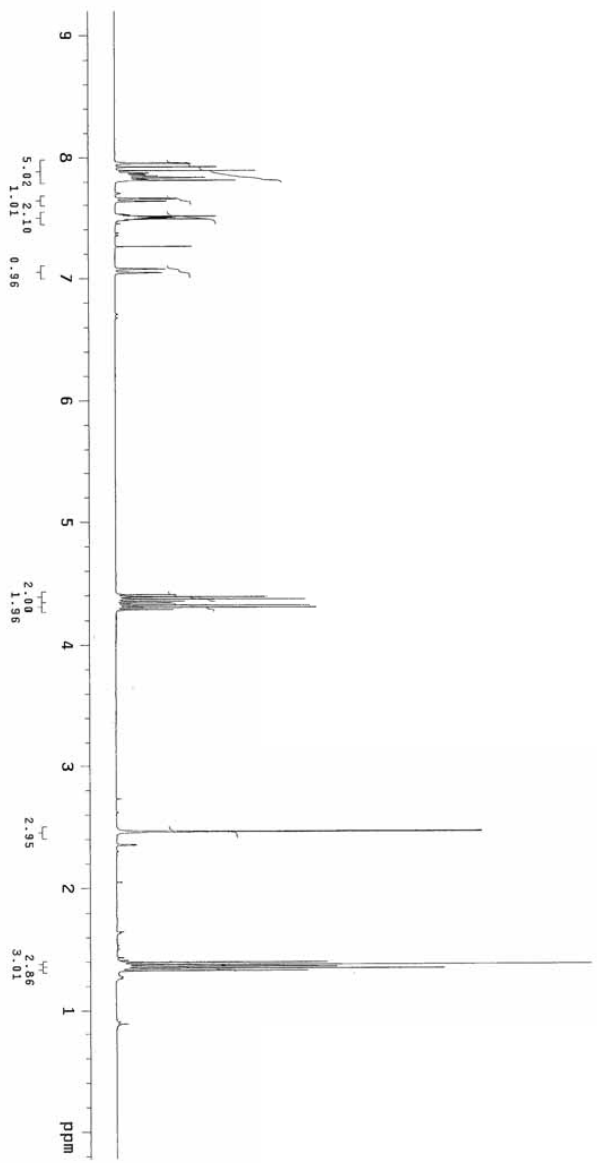

Sample Name: **11**  
File: **11-2015**  
Date Acquired on: **vmr13-vmr s400**  
Archive directory:  
Sample directory:  
FidFile: **CARBON**  
Pulse Sequence: **CARBON (szpu1)**  
Solvent: **cdcl3**  
Data Collected on: **Aug 13 2015**

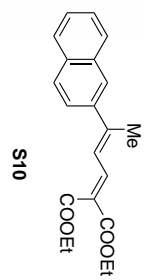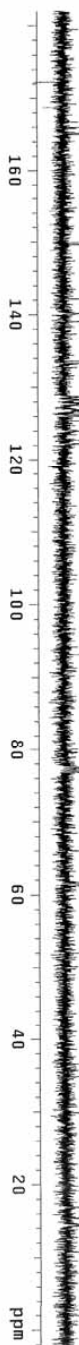

Sample Name: FH-IX-22  
Data Collected on: 8/24/15  
Archive directory:  
Sample directory:  
Fid file: PROTON  
Pulse Sequence: PROTON (szpu1)  
Solvent: cdcl3  
Data Collected on: Aug 24 2015

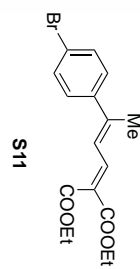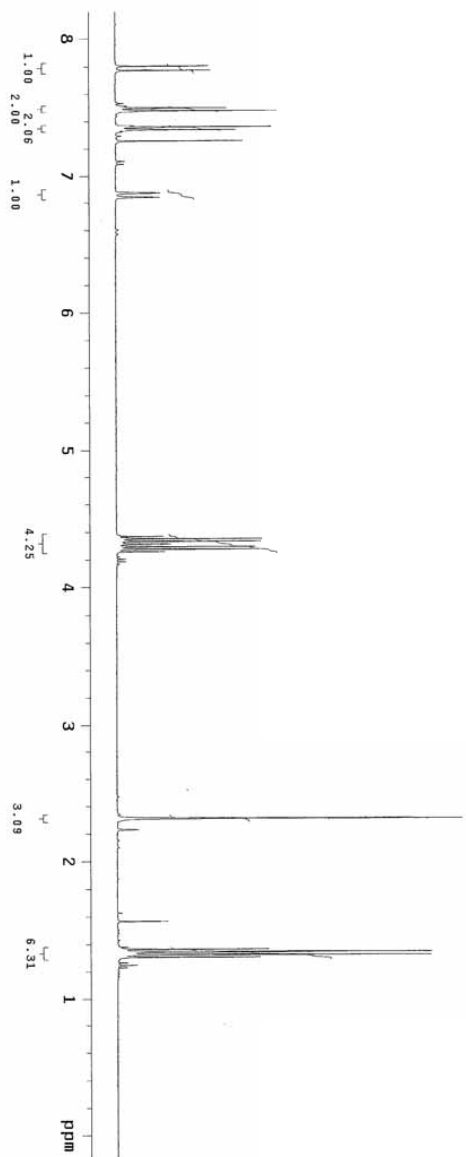

Sample Name: FM-IX-22  
Data Collected on: 12/15/2014 14:44  
Archive directory:  
Sample directory:  
F1dfile: CARBON  
Pulse Sequence: CARBON (s2pu1)  
Solvent: cdcl3  
Data collected on: Aug 24 2015

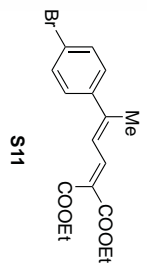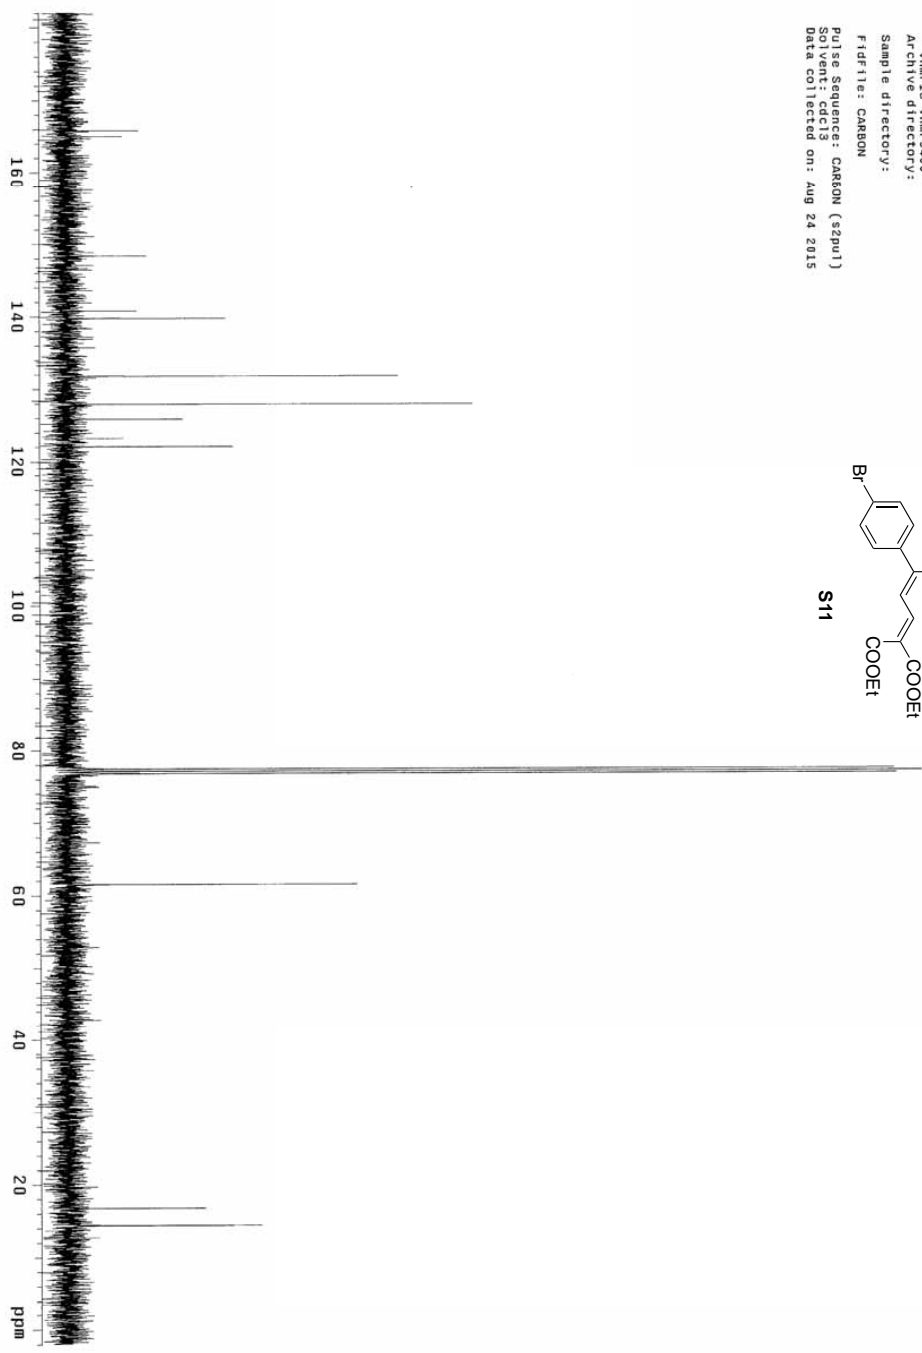

Sample Name: 7  
Data collected on: vnmr13-vnmr5400  
Archive directory:  
Sample directory:  
FIDfile: PROTON  
Pulse Sequence: PROTON (szpu1)  
Date collected on: Aug 10 2015

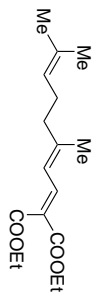

S12

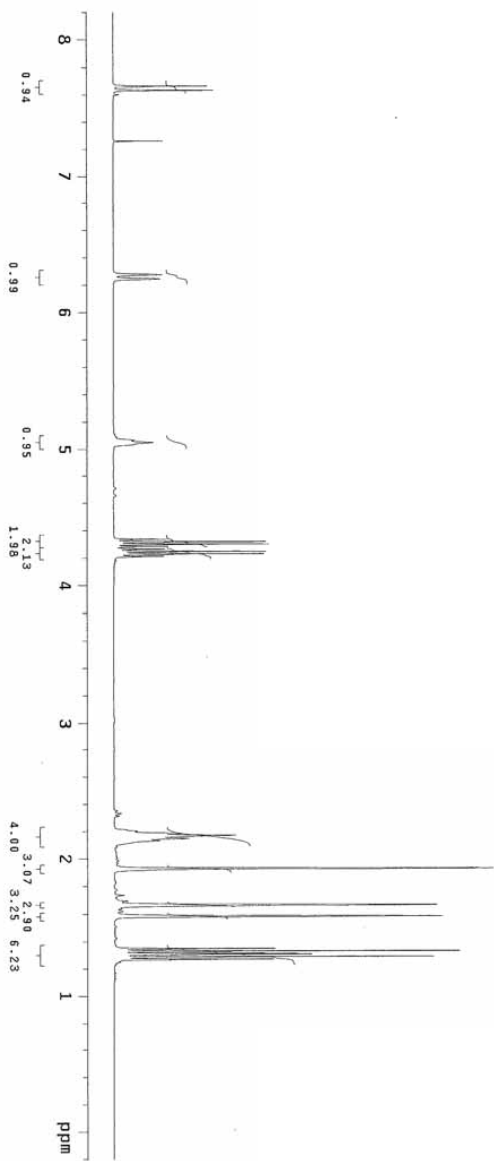

Sample Name: 7  
File Name: 7  
Data Collected on: vnmr13-vnmr-s400  
Archive directory:  
Sample directory:  
Fidfile: CARBON  
Pulse Sequence: CARBON (szpu1)  
Solvent:  
Data collected on: Aug 10 2015

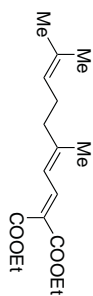

S12

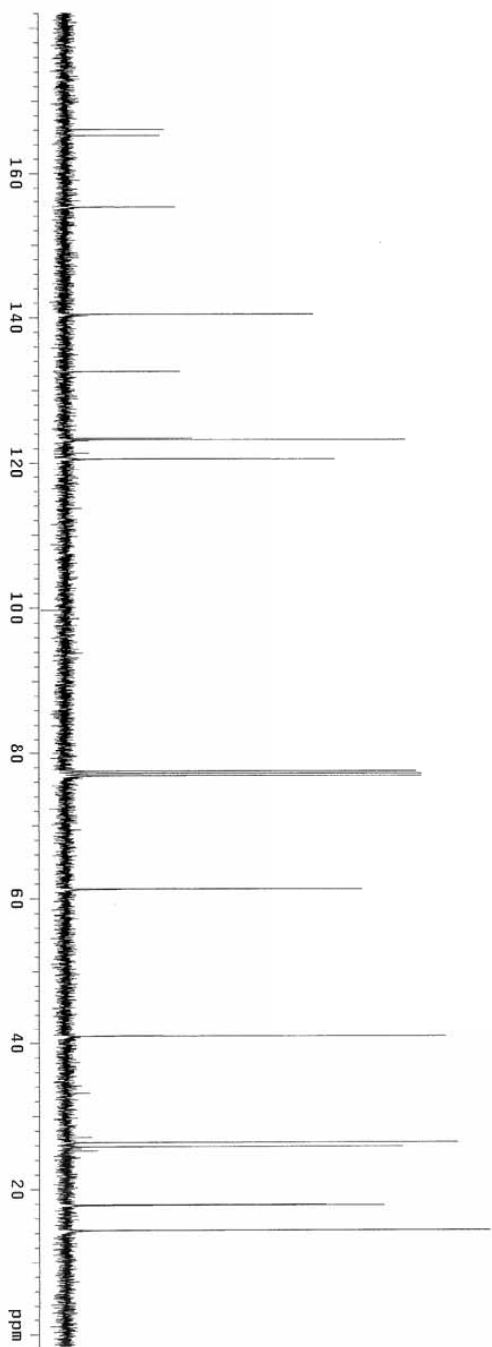



Sample Name: FM-IX-7  
 Data Collected on: 09/18/2015  
 Name of Sample: 10a  
 Name of Director: J. S. Kim  
 Sample directory: /data/10a  
 F1 file: PROTON  
 Pulse Sequence: PROTON (szpu1)  
 Solvent: cdcl3  
 Data collected on: Aug 18 2015

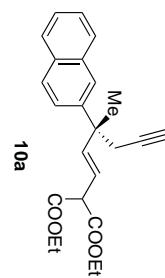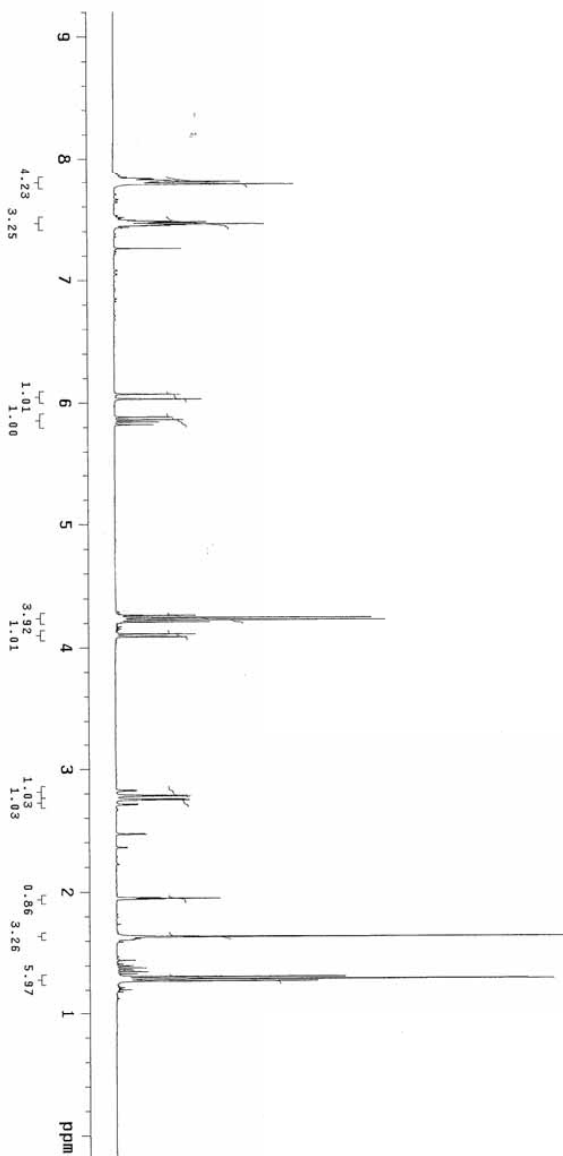

Sample Name: FM-IX-7  
Data Collected on: Bruker Avance 400  
Pulse Sequence: zgpg30  
Acquire Directory: Sample directory:  
FidFile: CARBON  
Pulse Sequence: CARBON (szpu1)  
Solvent: cdcl3  
Data collected on: Aug 18 2015

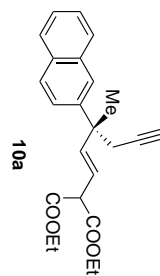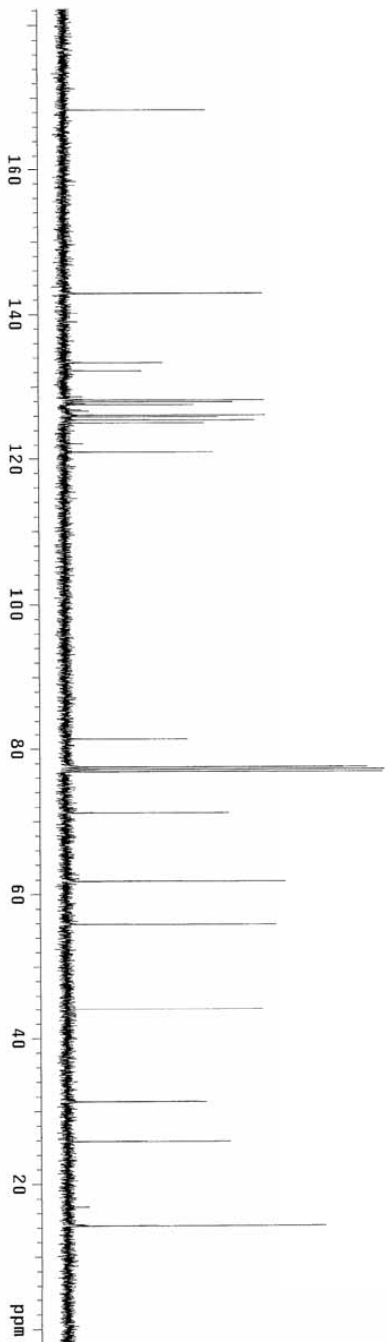

Sample Name: FK-IX-28  
 Data Collected on: 8/27/2015  
 Name of Sample: FK-IX-28  
 Archive directory:   
 Sample directory:   
 FID file: PROTON  
 Pulse Sequence: PROTON (szpu1)  
 Solvent: cdc13  
 Data collected on: Aug 27 2015

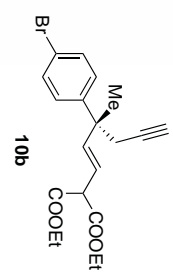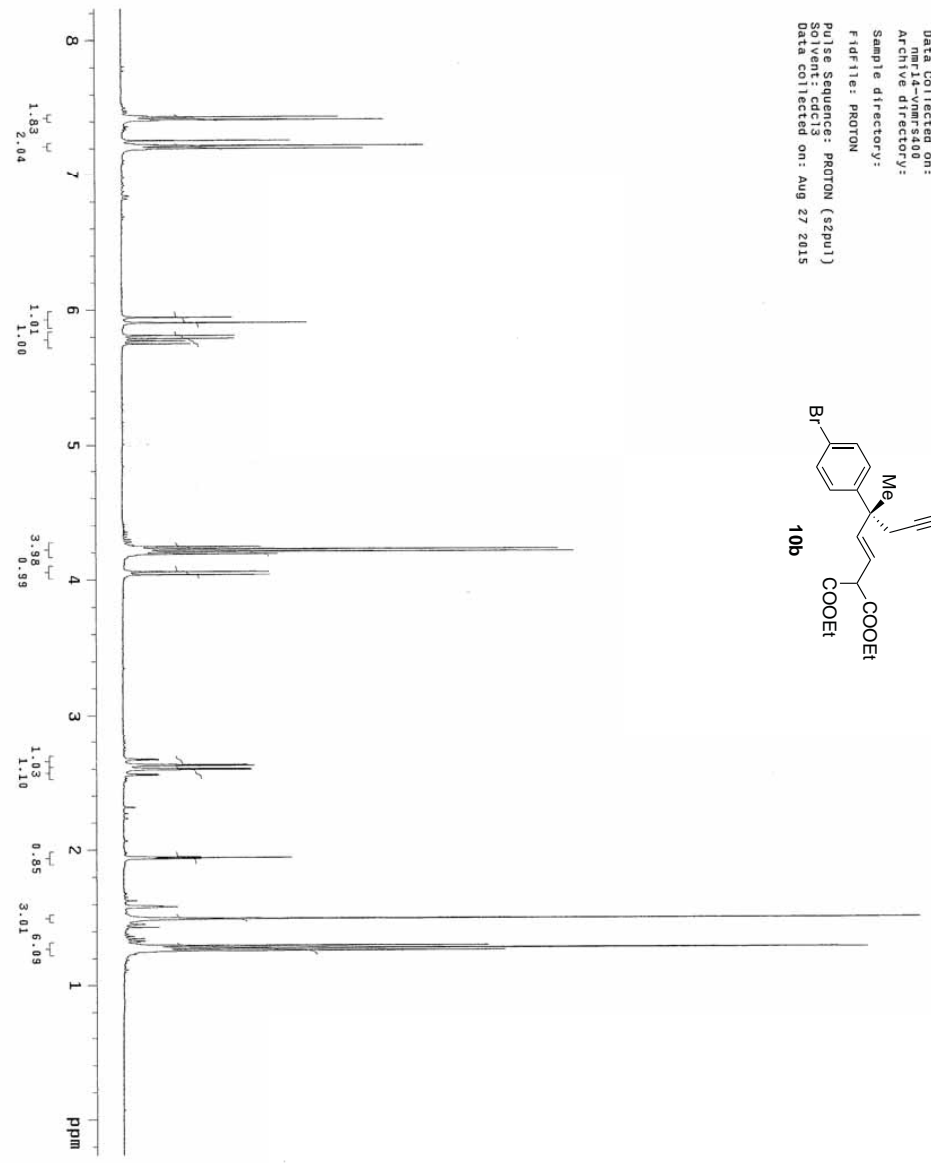

Sample Name: FM-IX-28  
Data Collected on: 8/27/2015 11:40:00  
Archive directory:  
Sample directory:  
FID File: CARBON  
Pulse Sequence: CARBON (s2pu1)  
Solvent: cdcl3  
Data collected on: Aug 27 2015

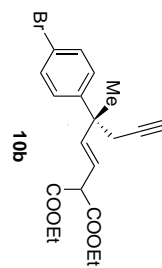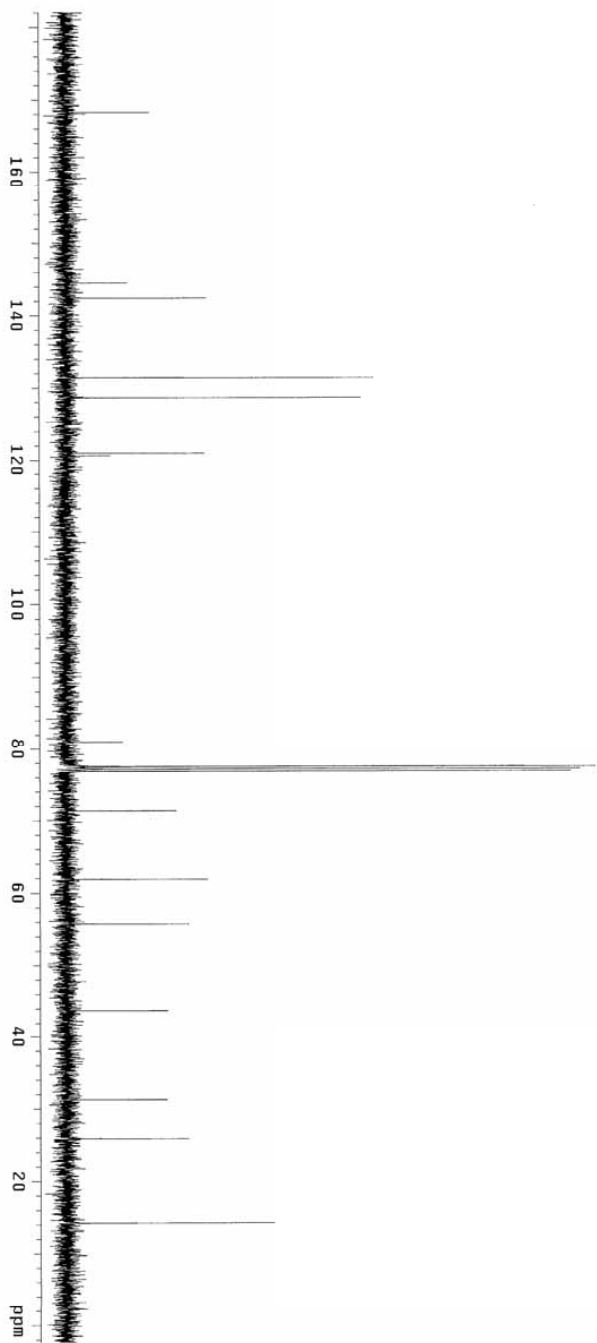

Sample Name: FM-1X-11  
Data Collected on: 20150818095400  
Archive directory:   
Sample directory:   
Fidfile: PROTON  
Pulse Sequence: PROTON (szpu1)  
Solvent: cdcl3  
Data collected on: Aug 18 2015

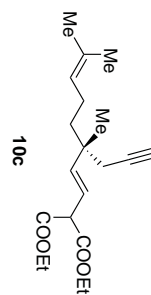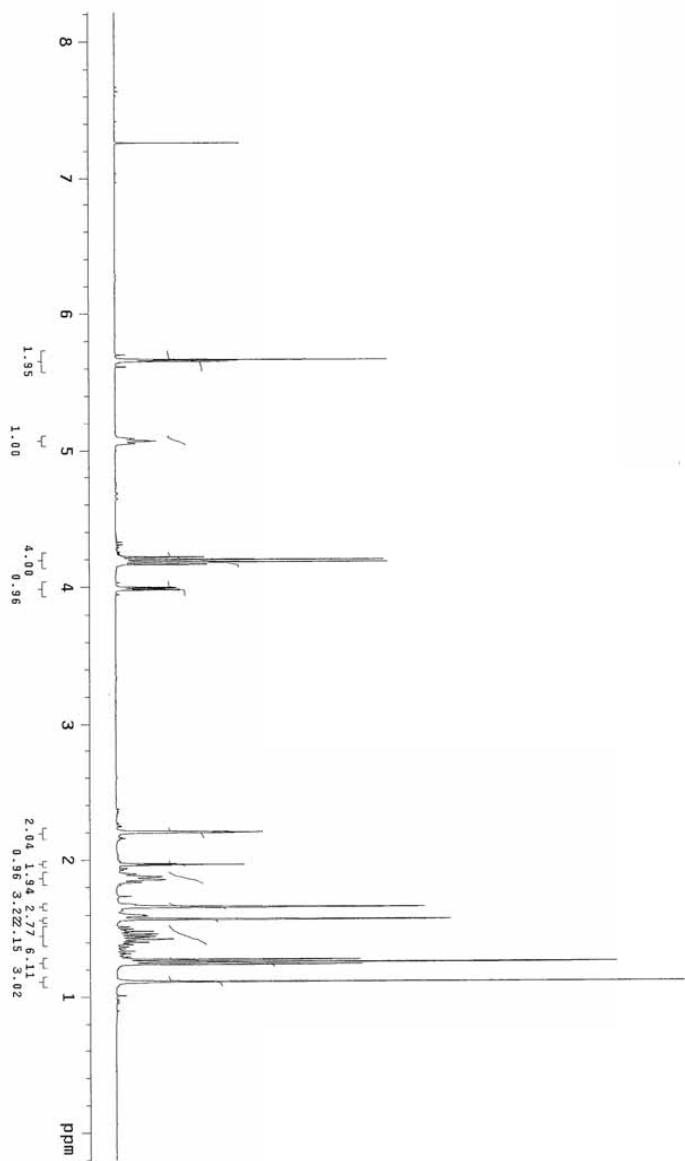

Sample Name: FM-18-11  
Data collected on: Vnmrj3-vnmr5400  
Archive directory:  
Sample directory:  
Fidfile: CARBON  
Pulse Sequence: CARBON (szpu1)  
Solvent: cdcl3  
Data collected on: Aug 18 2015

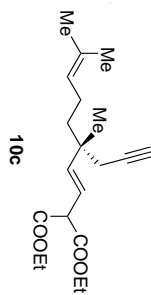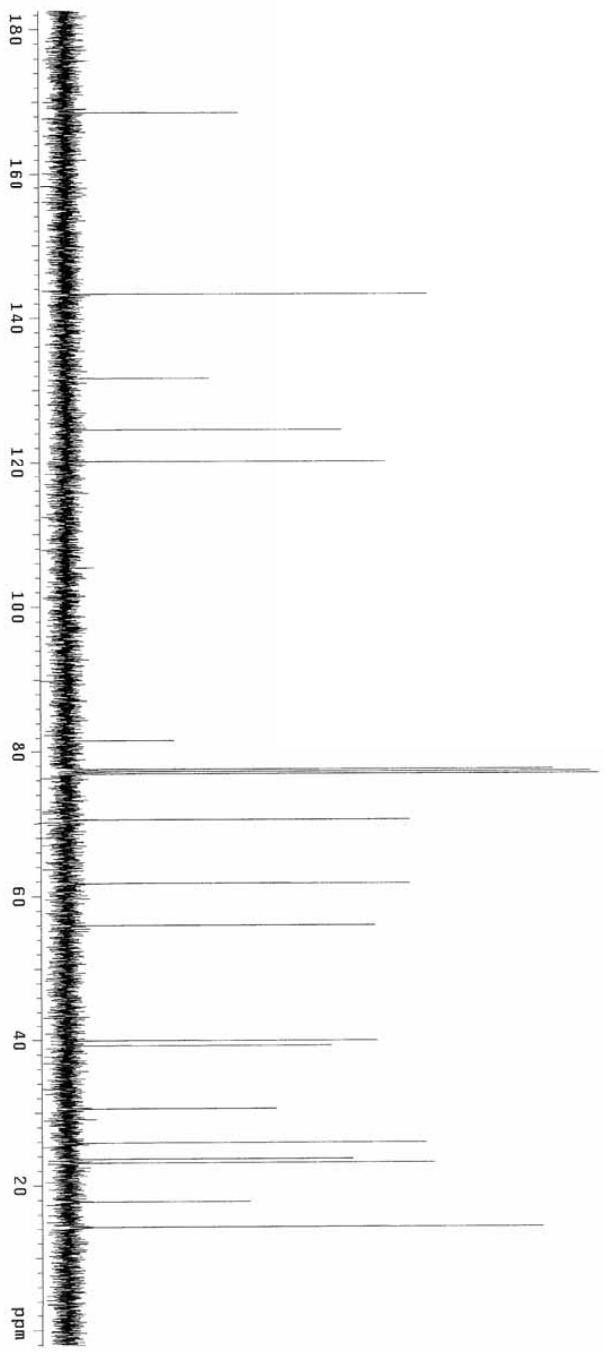

Sample Name: 12a  
 File Name: vnmr13-vmr-5400  
 Data Collected on: vnmr13-vmr-5400  
 Archive directory:  
 Sample directory:  
 FID file: PROTON  
 Pulse Sequence: PROTON (szpu1)  
 Solvent: CDCl3  
 Data collected on: Dec 30 2014

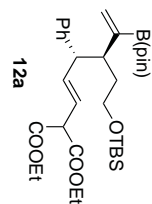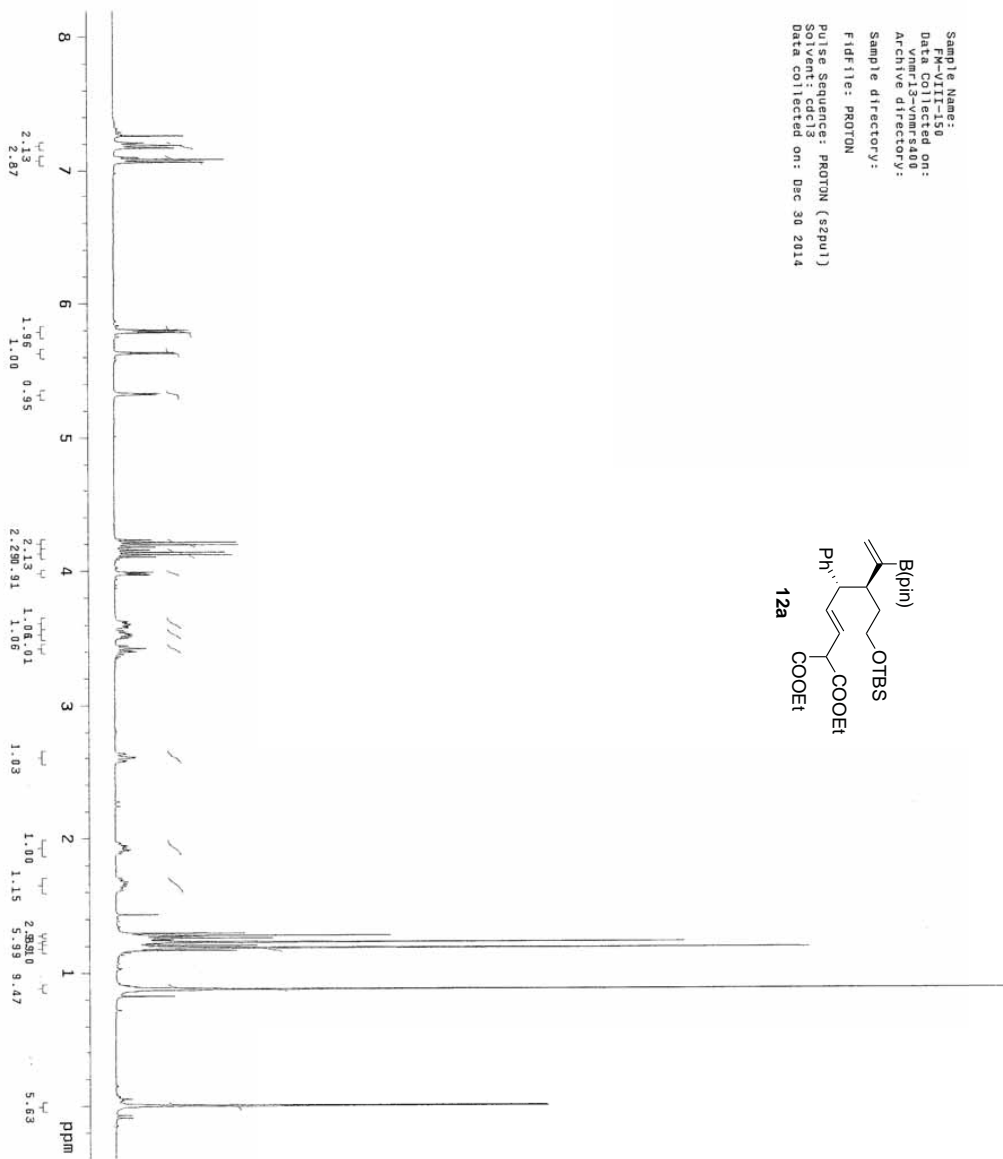

Sample Name: 12a  
Date Collected: 12/17/2014  
Vnmr13-vnmr5400  
Archive directory:  
Sample directory:  
Fidfile: CARBON  
Pulse Sequence: CARBON (szpu1)  
Solvent: cdcl3  
Data Collected on: Dec 30 2014

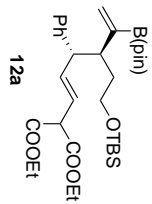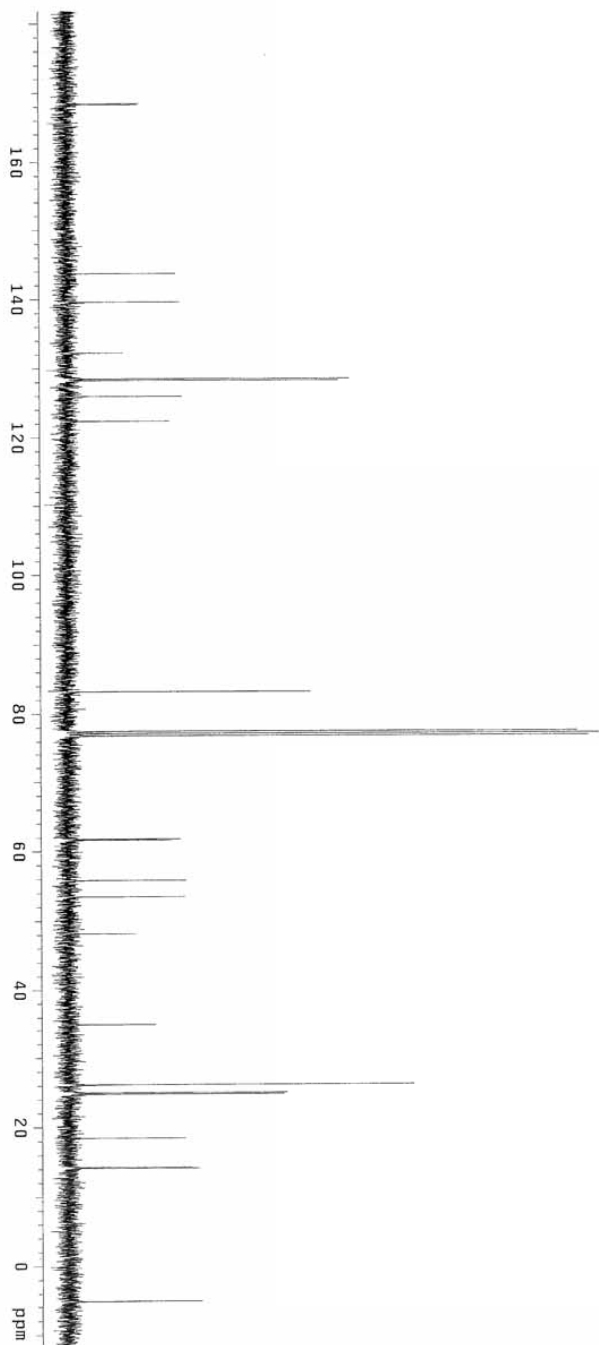



Sample Name: **12b**  
 Data Collected on: **nmr13-vnmr3480**  
 Archive directory:  
 Sample directory:  
 F1df file: **PROTON**  
 Pulse Sequence: **PROTON (zgpg1)**  
 Solvent: **cdcl3**  
 Data collected on: **Sep 24 2015**

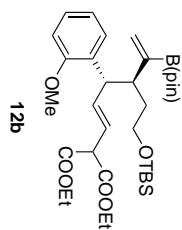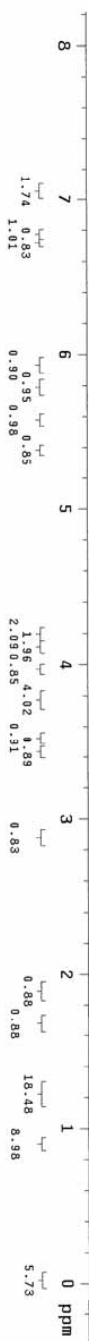

Sample Name: FM-IX-63  
Data Collected on: vnmr13-vnmr5400  
Archive directory:  
Sample directory:  
FidFile: CARBON  
Pulse Sequence: CARBON (zgpg1)  
Solvent: cdcl3  
Data collected on: Sep 24 2015

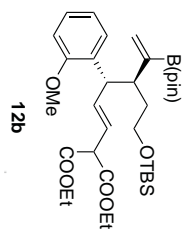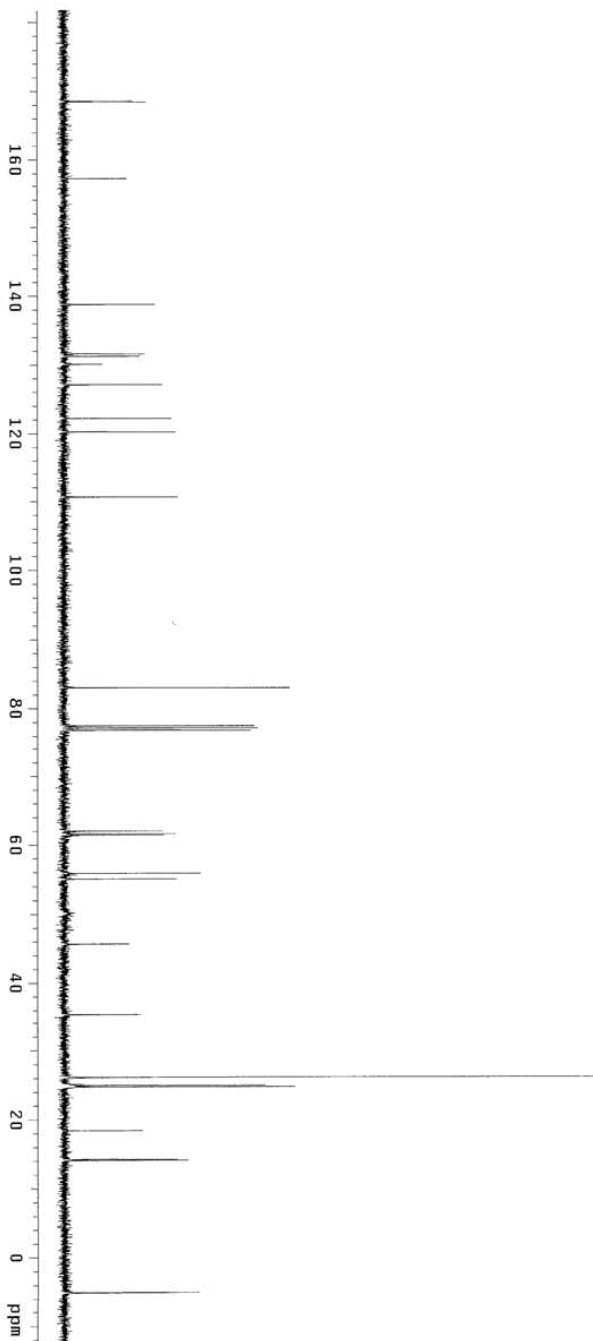

Sample Name: FM-IX-69  
 Data Collected on: vnmr13-vnmr5400  
 Archive directory:  
 Sample directory:  
 F1file: PROTON  
 Pulse Sequence: PROTON (zgpg1)  
 Solvent: cdcl3  
 Data collected on: Sep 24 2015

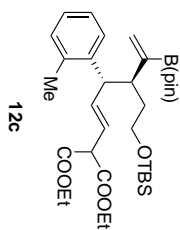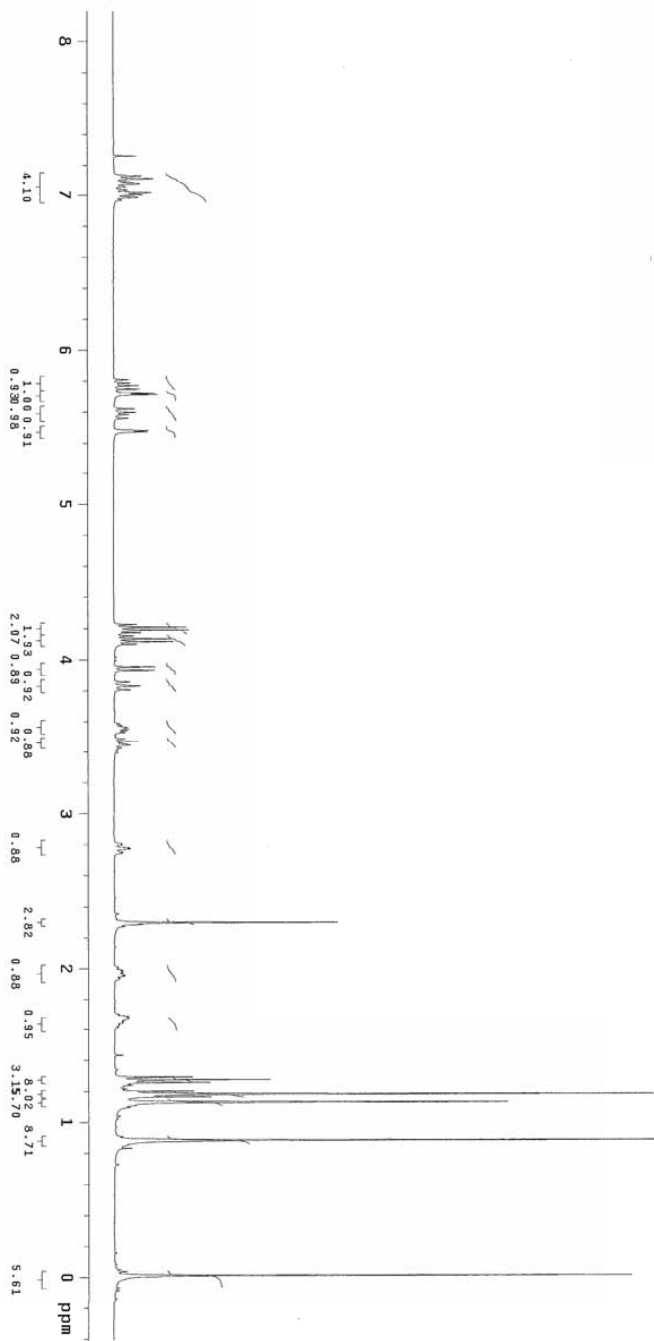

Sample Name:  
FW-IX-69  
Data Collected on:  
Vnmr13-vnmr8480  
Archive directory:  
Sample directory:  
F1df11e: CARBON  
Pulse Sequence: CARBON (zgpg1)  
Solvent: cdcl3  
Data collected on: Sep 24 2015

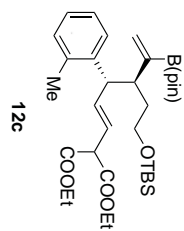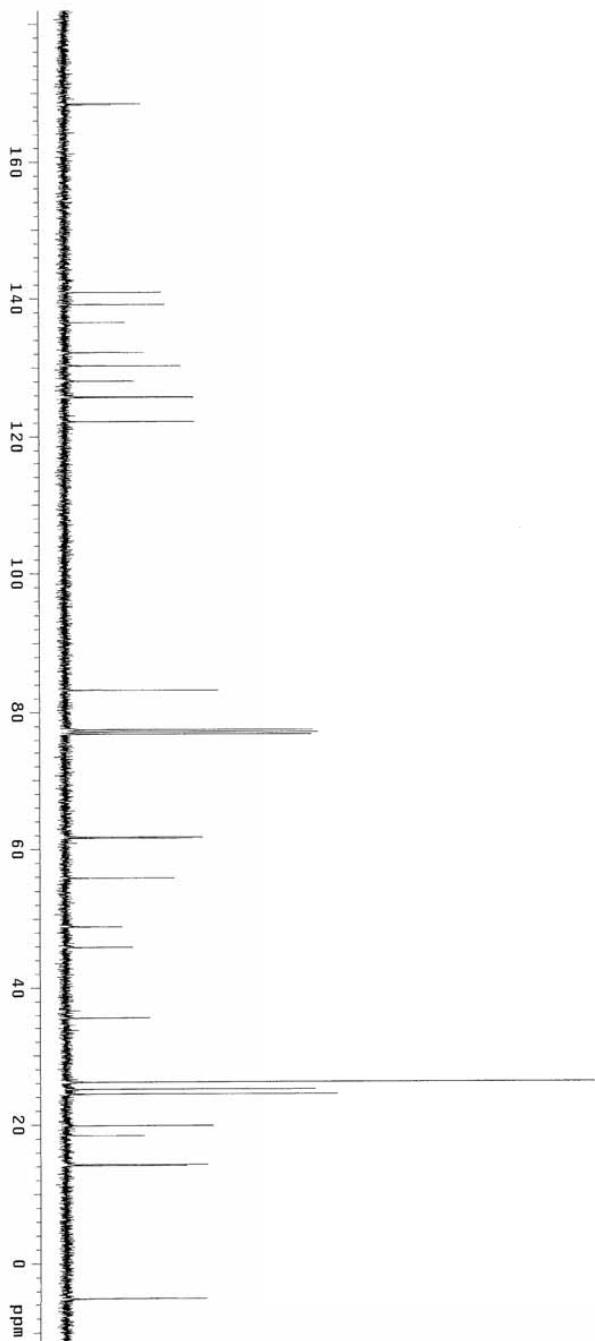

Sample Name: FM-IX-68  
Data Collected on: vnmr13-vnmr440  
Archive directory:  
Sample directory:  
F1df11e: PROTON  
Pulse Sequence: PROTON (zgpg1)  
Solvent: cdcl3  
Data collected on: Sep 24 2015

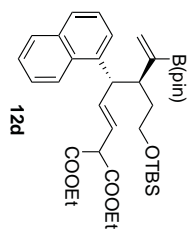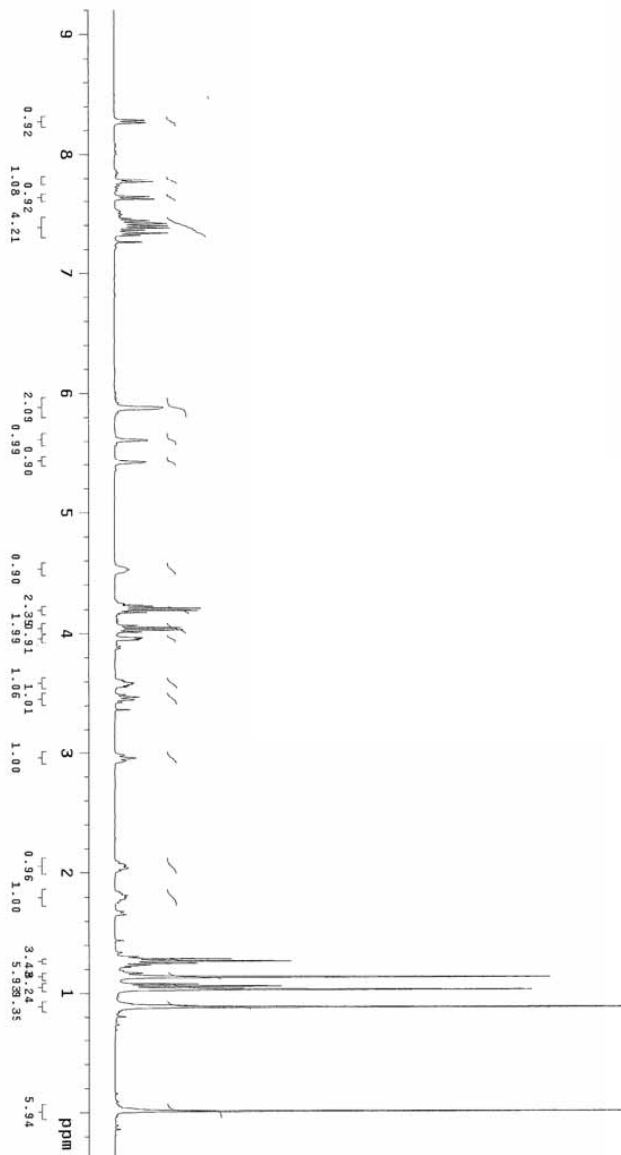

Sample Name: FM-IX-68  
 Data Collected on: vnmr13-vnmr480  
 Archive directory:  
 Sample directory:  
 F1df-file: CARBON  
 Pulse Sequence: CARBON (zgpg1)  
 Solvent: CDCl3  
 Data collected on: Sep 24 2015

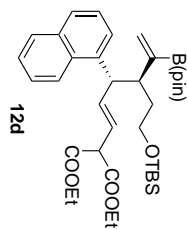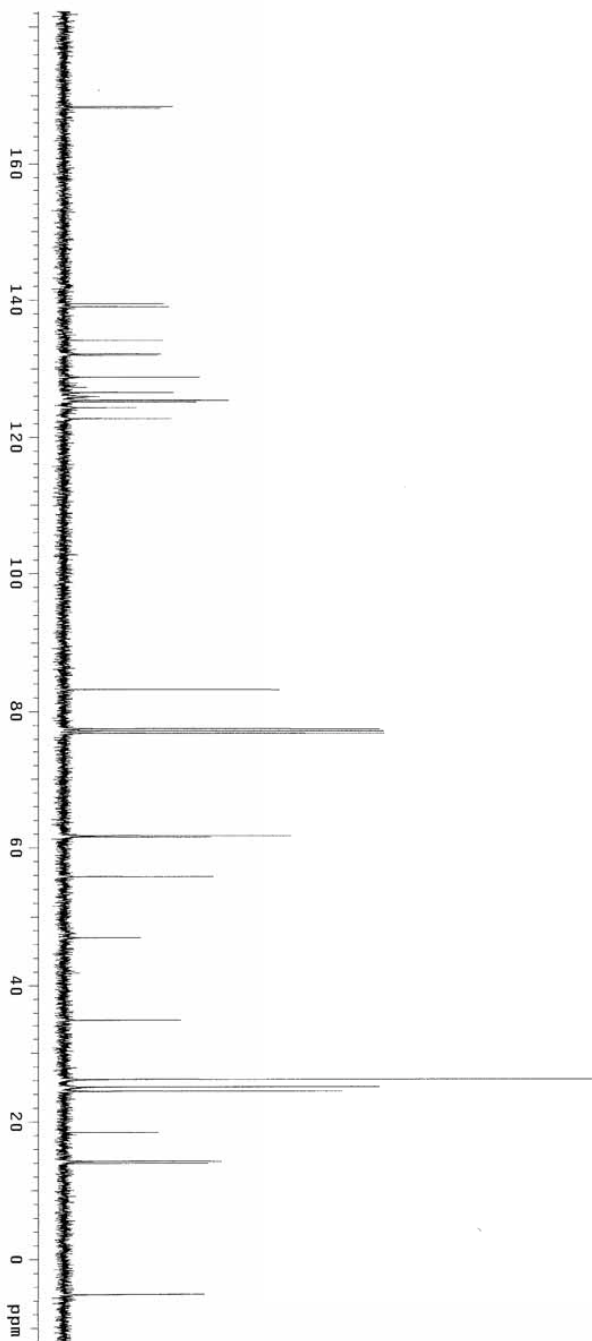

Sample Name: FM-IX-54  
 Data Collected on: vnmr13-vnmr5400  
 Archive directory: Sample directory:  
 F1dfile: PROTON  
 Pulse Sequence: PROTON (sgpu)  
 Solvent: cdcl3  
 Data collected on: Sep 11 2015

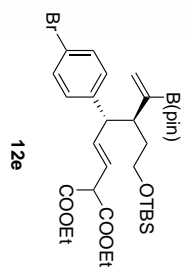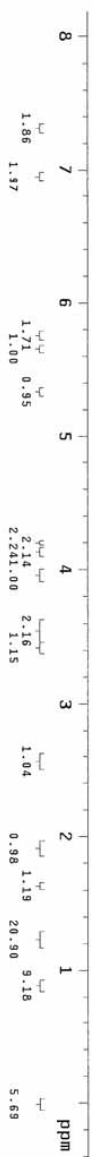

Sample Name: FW-IX-54  
Data Collected on: mri3-vnmr-800  
Archive directory:  
Sample directory:  
Fidfile: CARBON  
Pulse Sequence: CARBON (zgpg1)  
Solvent: cdcl3  
Data collected on: Sep 11 2015

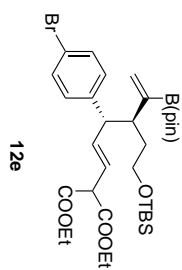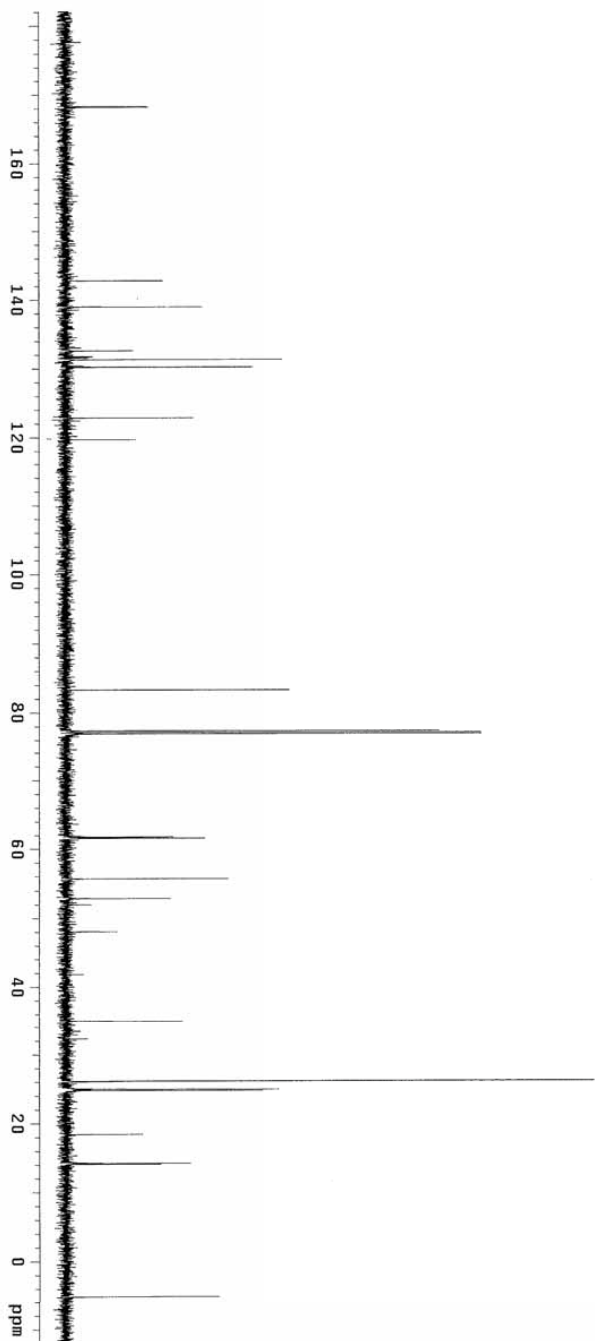



Sample Name: FK-IX-53  
 Data Collected on: 09m15-vmm3400  
 Archive directory:  
 Sample directory:  
 F1dir11e: PROTON  
 Pulse Sequence: PROTON (s2pu1)  
 Solvent: cdcl3  
 Data collected on: Sep 11 2015

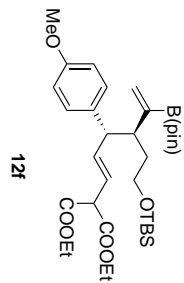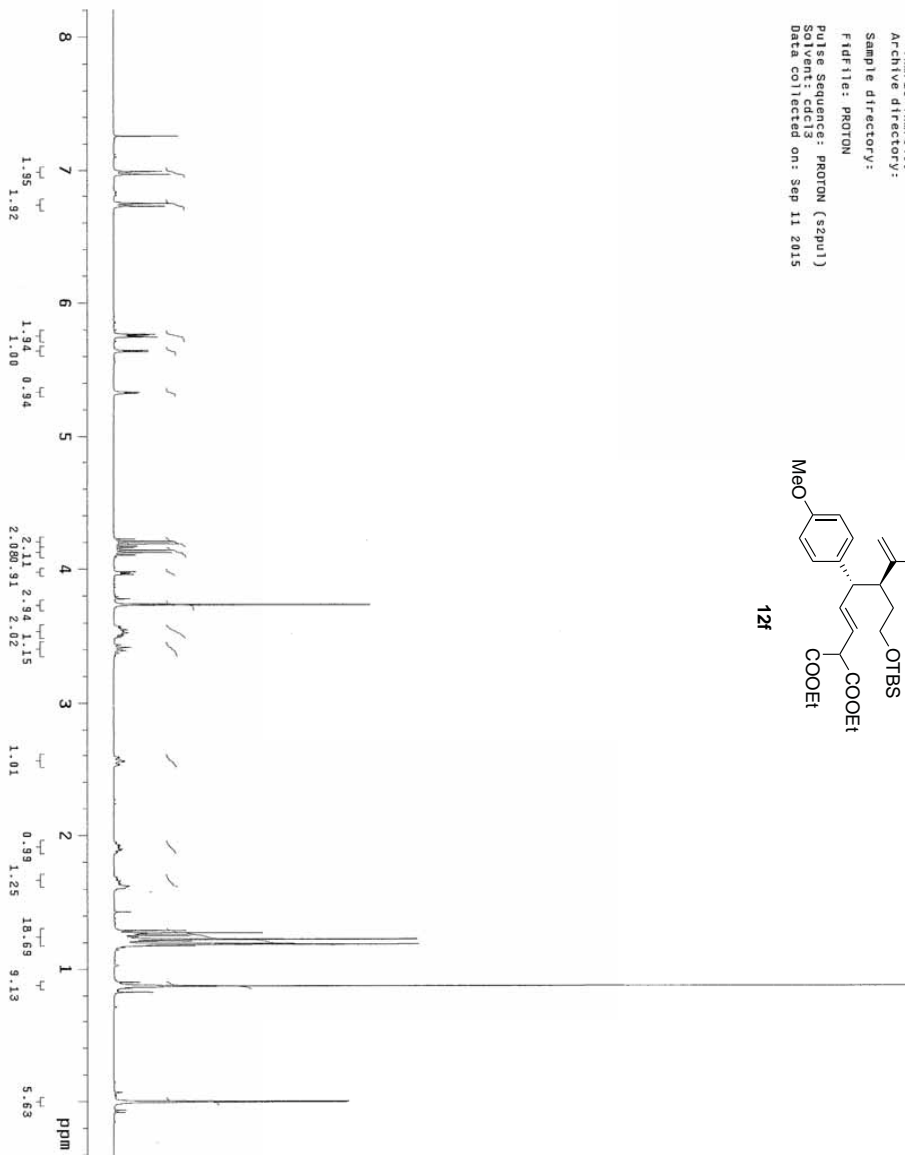

Sample Name: F4-IX-53  
Data Collected on: 11/13/2015 13:40  
Archive directory:  
Sample directory:  
Fidfile: CARBON  
Pulse Sequence: CARBON (s2pu1)  
Solvent: cdcl3  
Data collected on: Sep 11 2015

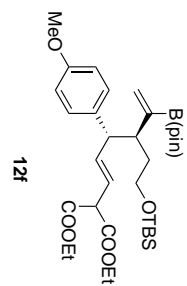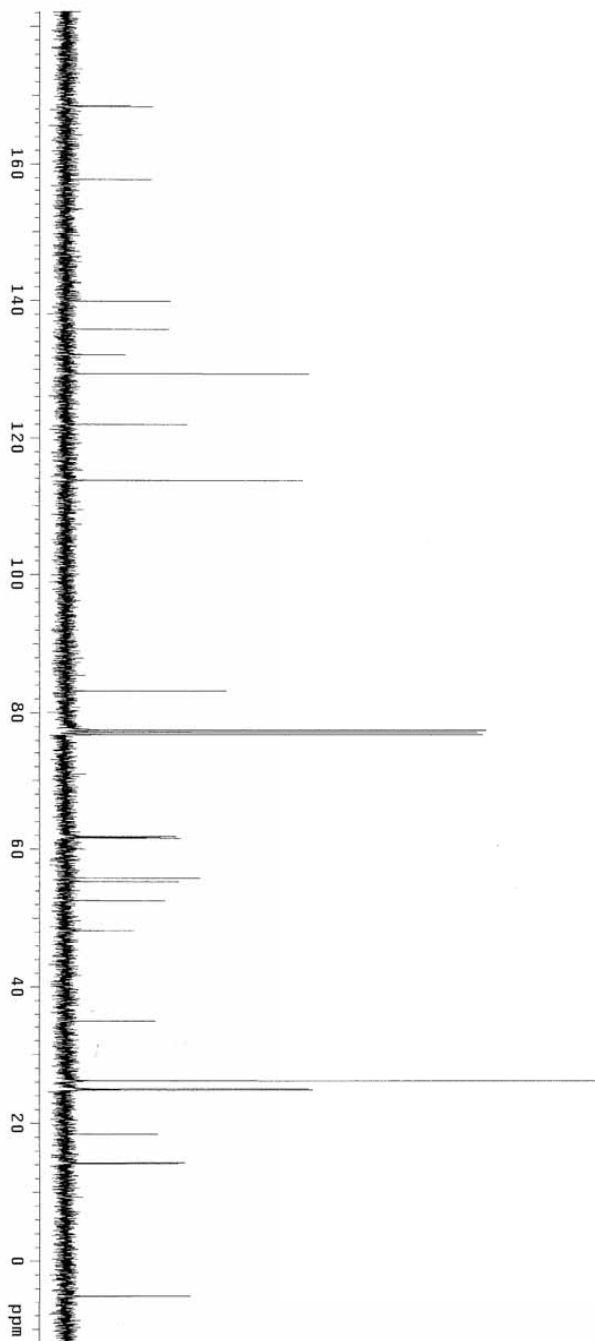

Sample Name: FM-IX-72  
 Data Collected on: vnmr13-vnmr5400  
 Archive directory:  
 Sample directory:  
 F1dfile: PROTON  
 Pulse sequence: PROTON (zgpg3)  
 Solvent: CDCl3  
 Data collected on: Sep 24 2015

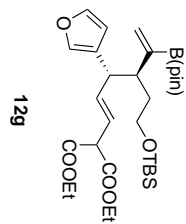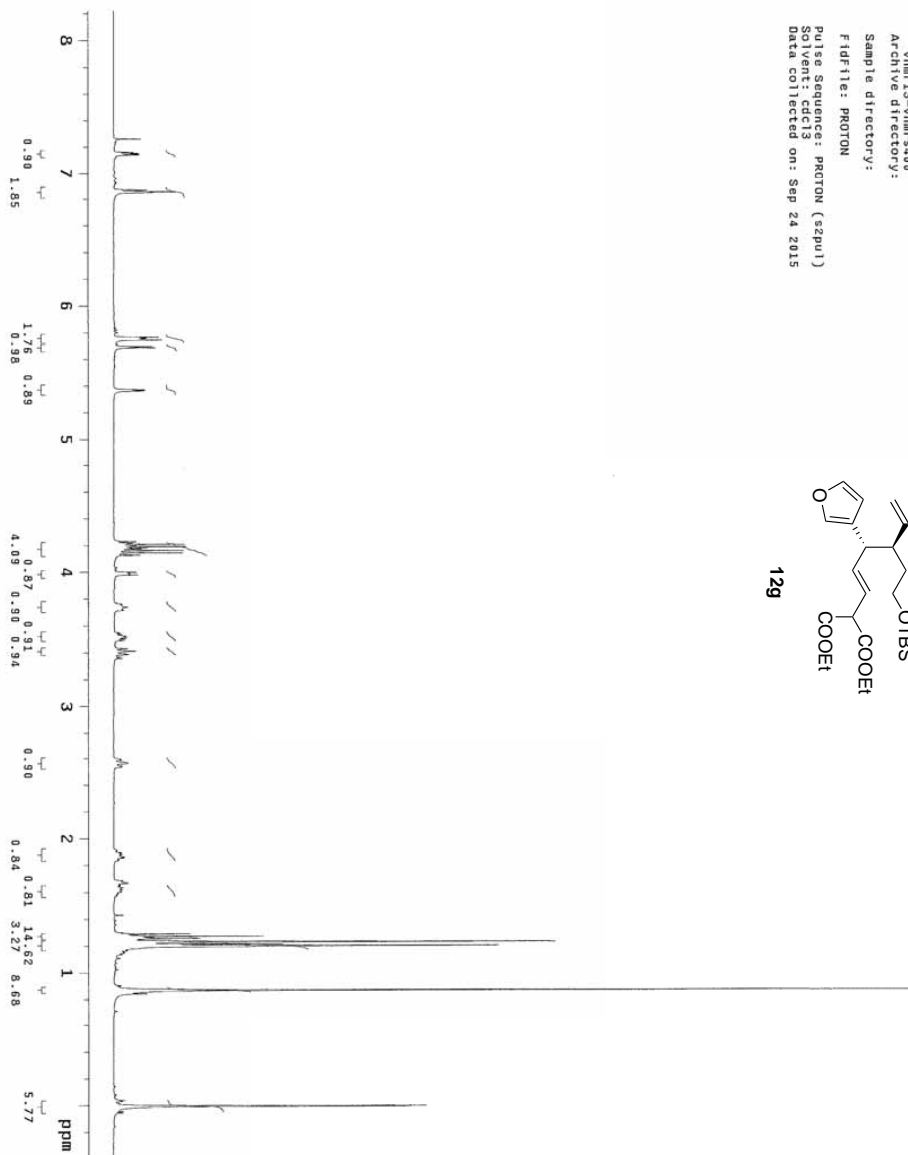

Sample Name: FM-IX-72  
Data Collected on: vnmr13-vnmr540  
Archive directory: Sample directory:  
F1df file: CARBON  
Pulse Sequence: CARBON (szpu1)  
Solvent: cdcl3  
Data collected on: Sep 24 2015

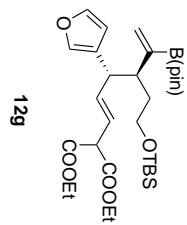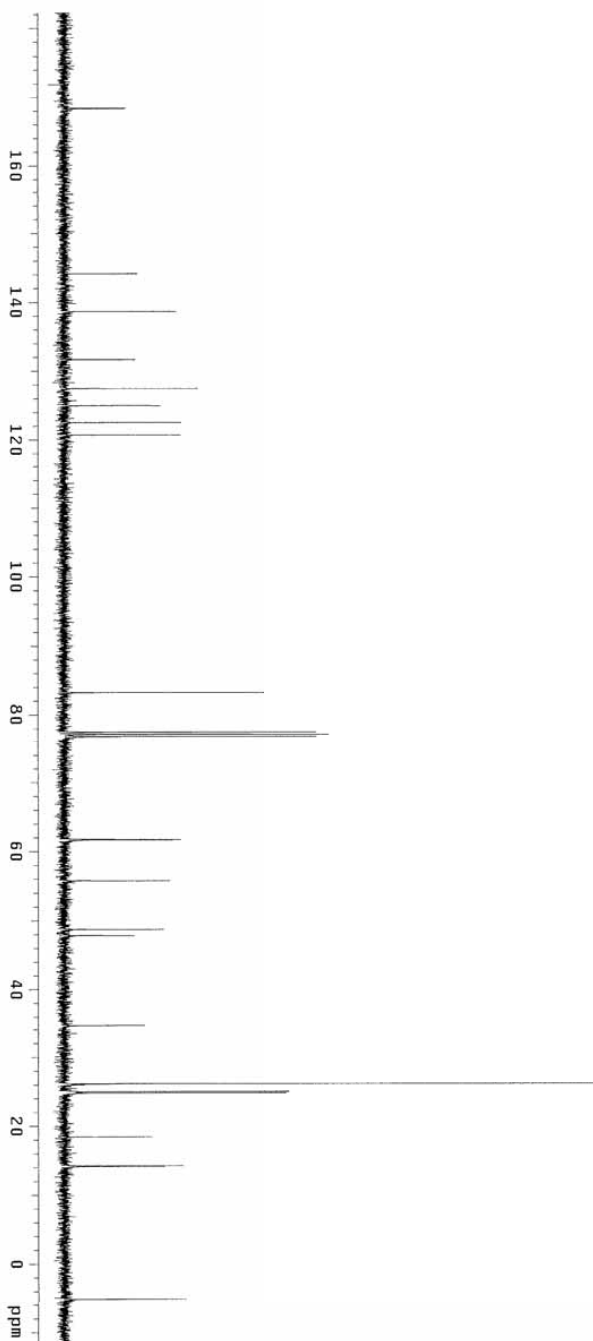

Sample Name: FM-IX-67  
 Data Collected on: vnmr13-vnmr440  
 Archive directory:  
 Sample directory:  
 F1DF11: PROTON  
 Pulse Sequence: PROTON (zgpg1)  
 Solvent: cdcl3  
 Data collected on: Sep 24 2015

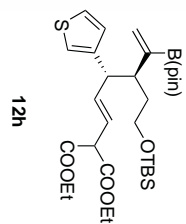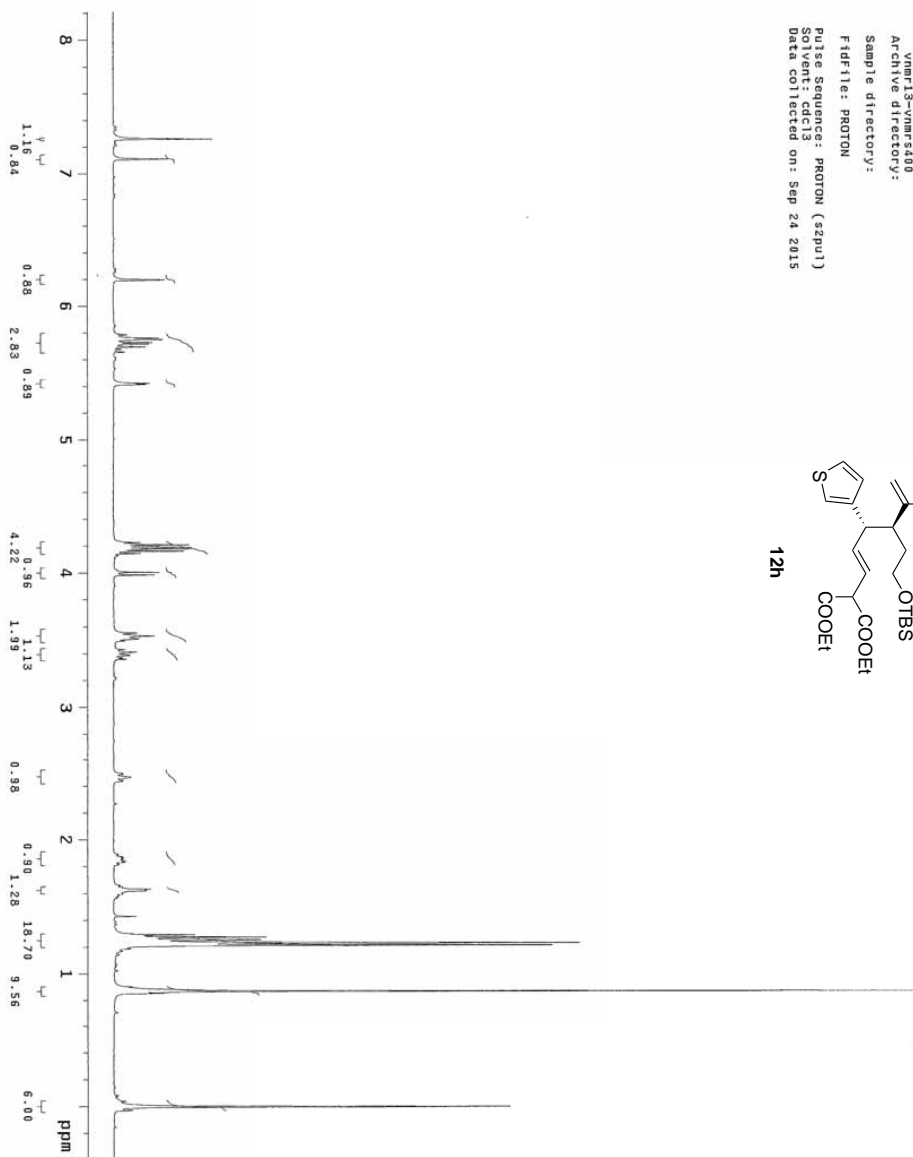

Sample Name: FM-IX-67  
Data Collected on: vnmr13-vnmr5400  
Archive directory:  
Sample directory:  
Fidfile: CARBON  
Pulse Sequence: CARBON (zgpg1)  
Solvent: CDCl3  
Data collected on: Sep 24 2015

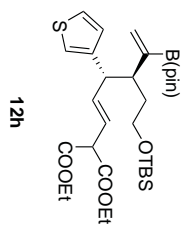

12h

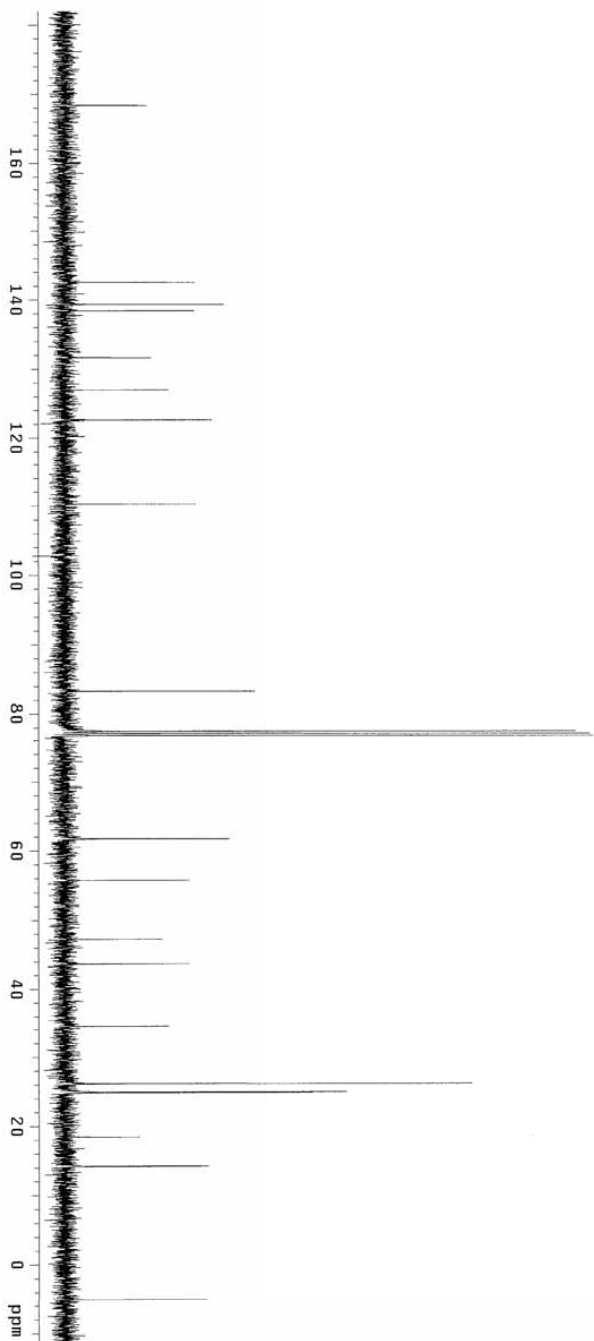

Sample Name: FM-IX-70  
 Data Collected on: vnmr13-vnmr540  
 Archive directory: Sample directory:  
 F1df file: PROTON  
 Pulse Sequence: PROTON (s2pu1)  
 Solvent: cdcl3  
 Data collected on: Sep 24 2015

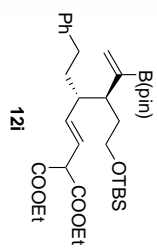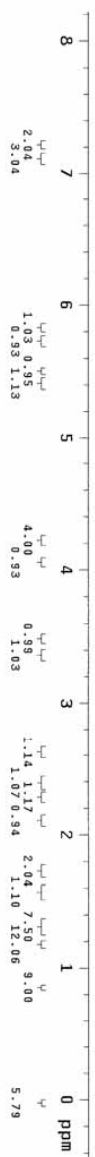

Sample Name: FM-IX-70  
Data Collected on: vnmr13-vnmr540  
Archive directory:  
Sample directory:  
Fid/Title: CARBON  
Pulse Sequence: CARBON (s2pu1)  
Solvent: cdcl3  
Data collected on: Sep 24 2015

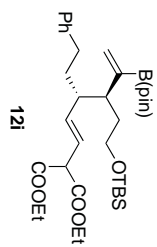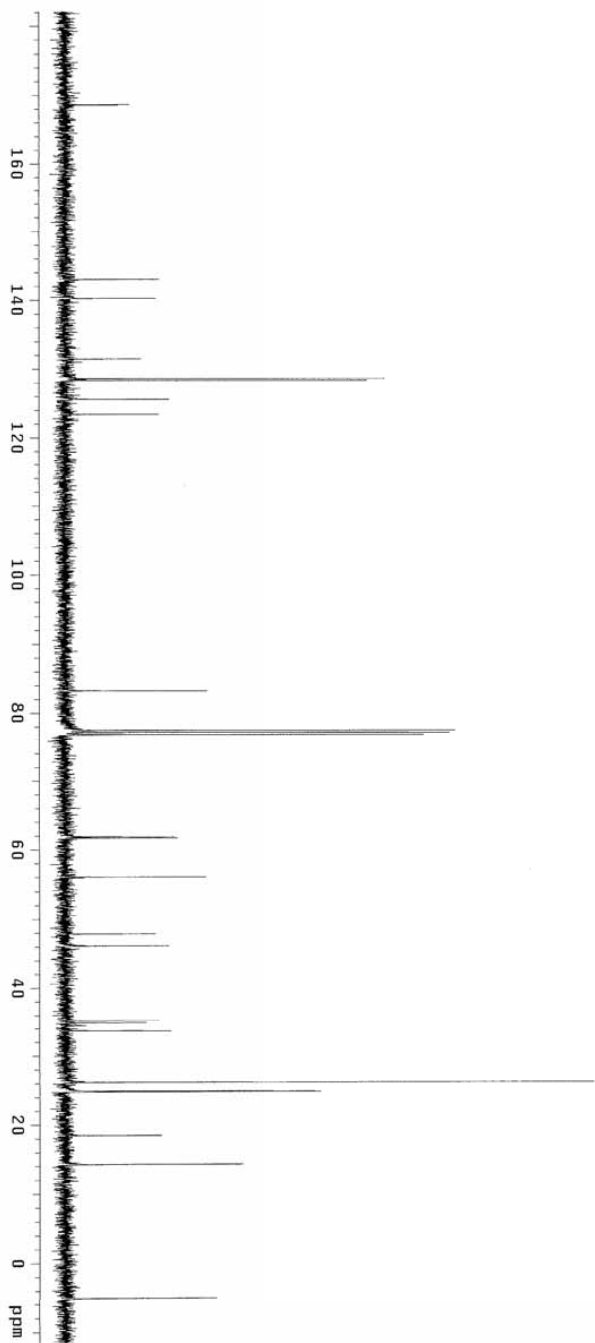



Sample Name: FM-IX-89  
 Data Collected on: vnmr13-vnmr440  
 Archive directory:  
 Sample directory:  
 F1df11e: PROTON  
 Pulse Sequence: PROTON (zgpg1)  
 Solvent: cdcl3  
 Data collected on: Oct 7 2015

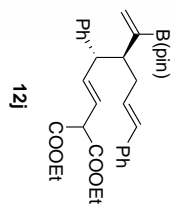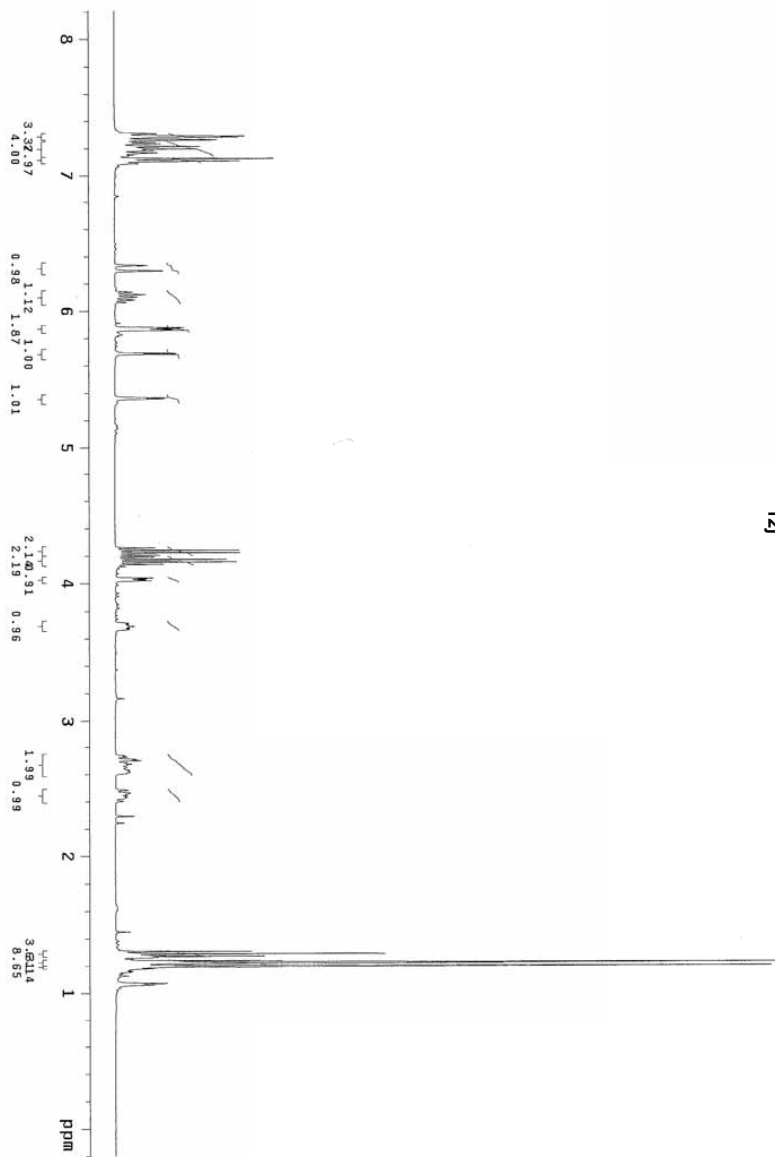

Sample Name:  
PK-IX-89  
Data Collected on:  
vnmr-13-vnmr-400  
Archive directory:  
Sample directory:  
Fidfile: CARBON  
Pulse Sequence: CARBON (zgpg1)  
Solvent: cdcl3  
Data collected on: Oct 7 2015

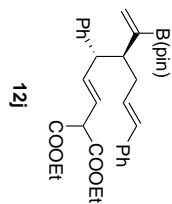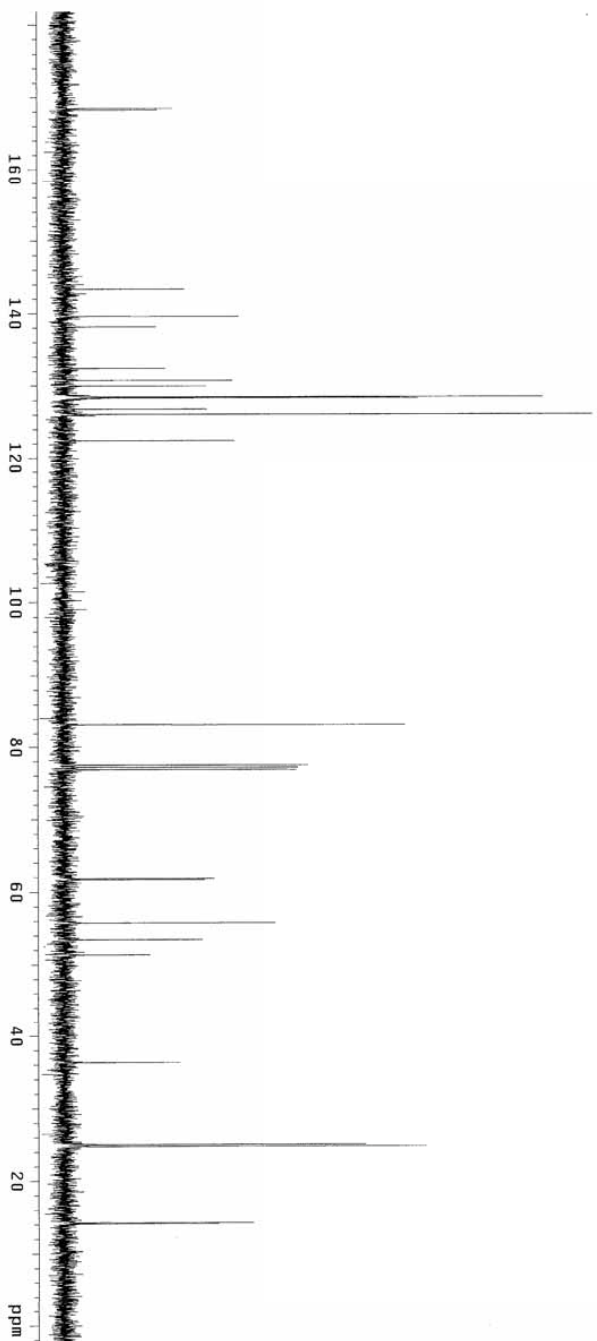

Sample Name:  
 Data Collected on:  
 vnmr13-vnmr3400  
 Archive directory:  
 Sample directory:  
 FID file: PROTON  
 Pulse Sequence: PROTON (szpu1)  
 Solvent: CDCl3  
 Data collected on: Oct 15 2015

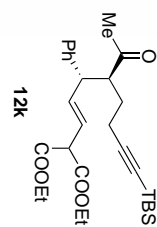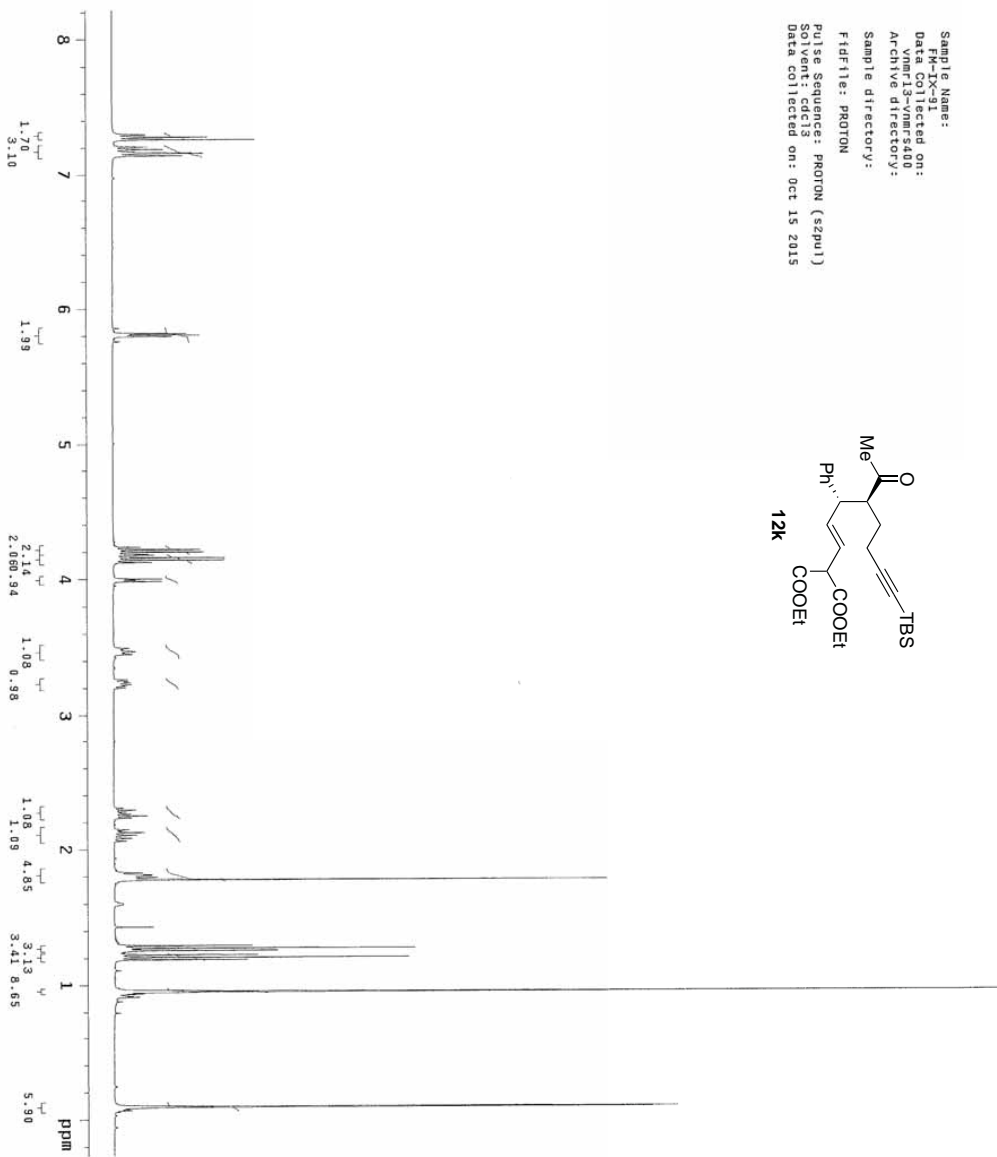

Sample Name:  
Data Collected on:  
vnmr13-vnmr3480  
Archive directory:  
Sample directory:  
Fidfile: CARBON  
Pulse Sequence: CARBON (s2pu1)  
Date Collected: 10/15/2015  
Data collected on: Oct 15 2015

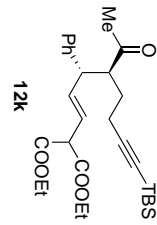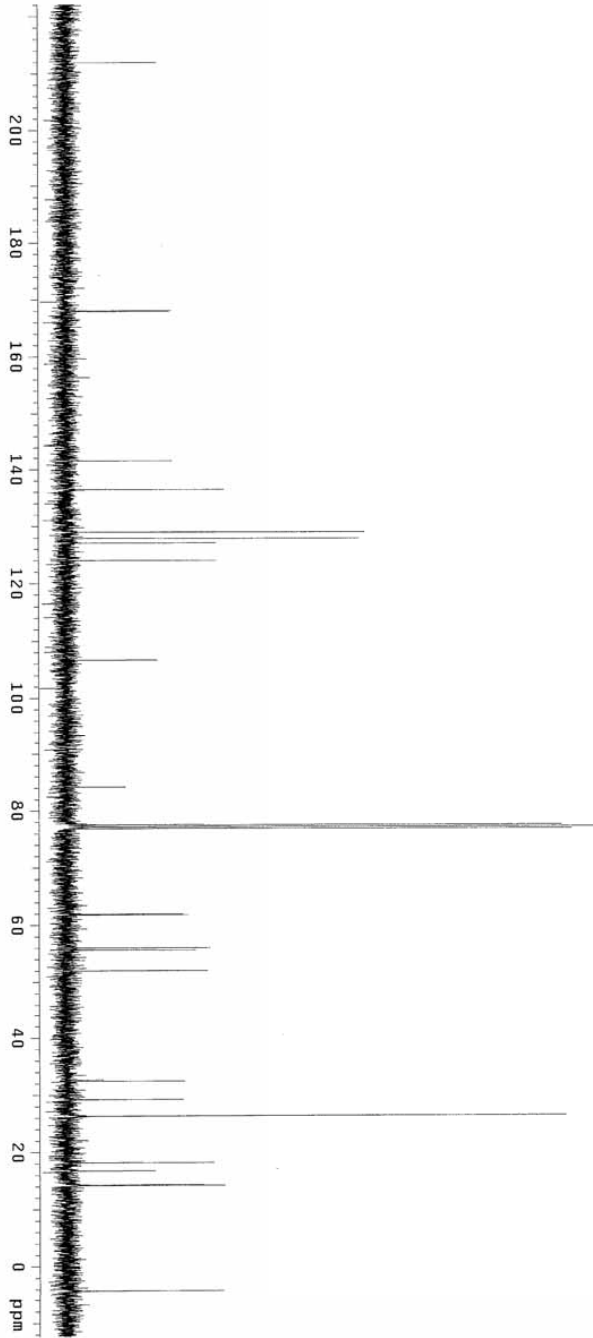

Sample Name: vmmar13-vmr9400  
 Data Collected on: vmmar13-vmr9400  
 Archive directory:  
 Sample directory:  
 FIDFile: PROTON  
 Pulse Sequence: PROTON (szpu1)  
 Data collected on: sep 28 2015

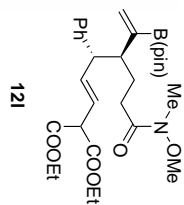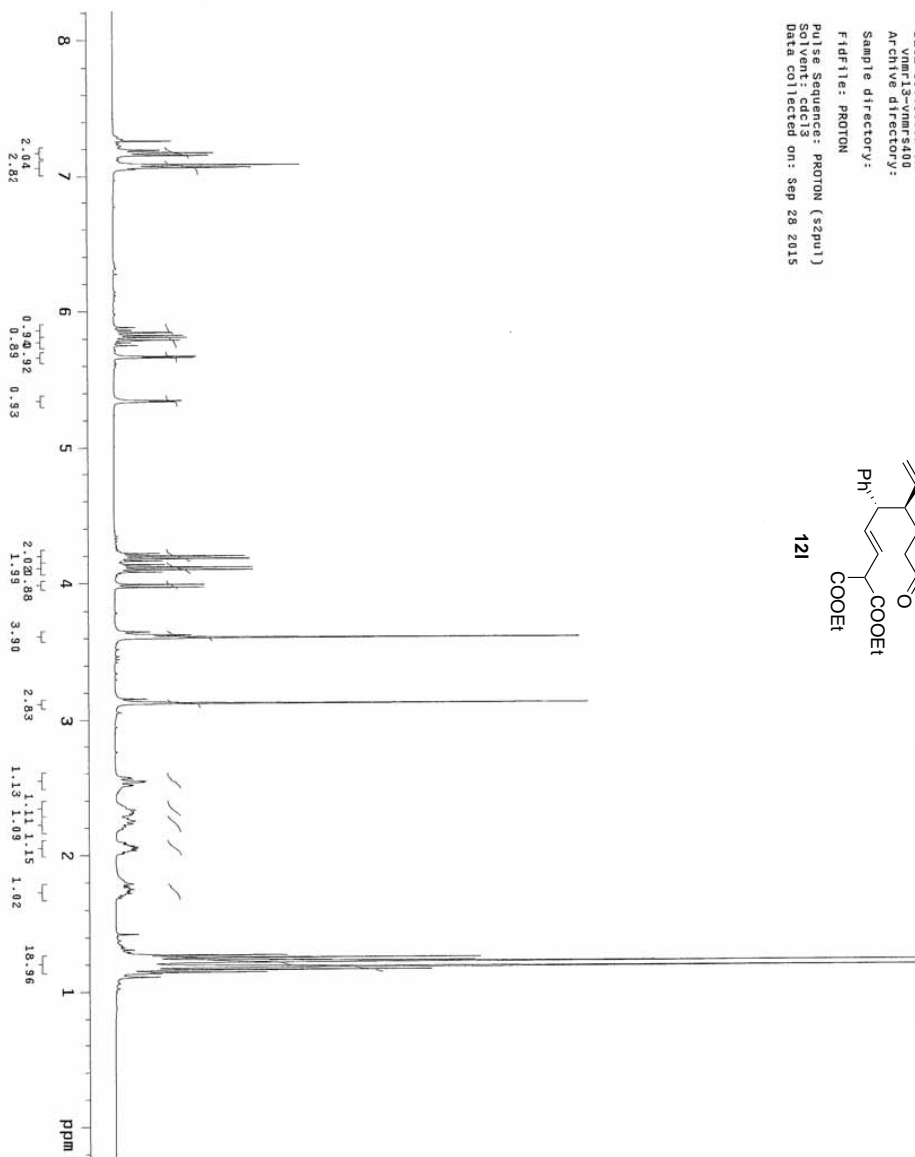

Sample Name:  
P-1-X-8  
Data Collected on:  
vnmr13-vnmr5400  
Archive directory:  
Sample directory:  
F1df file: CARBON  
Pulse Sequence: cason (zpu1)  
Solvent: cdcl3  
Data collected on: Sep 28 2015

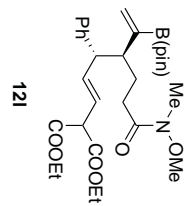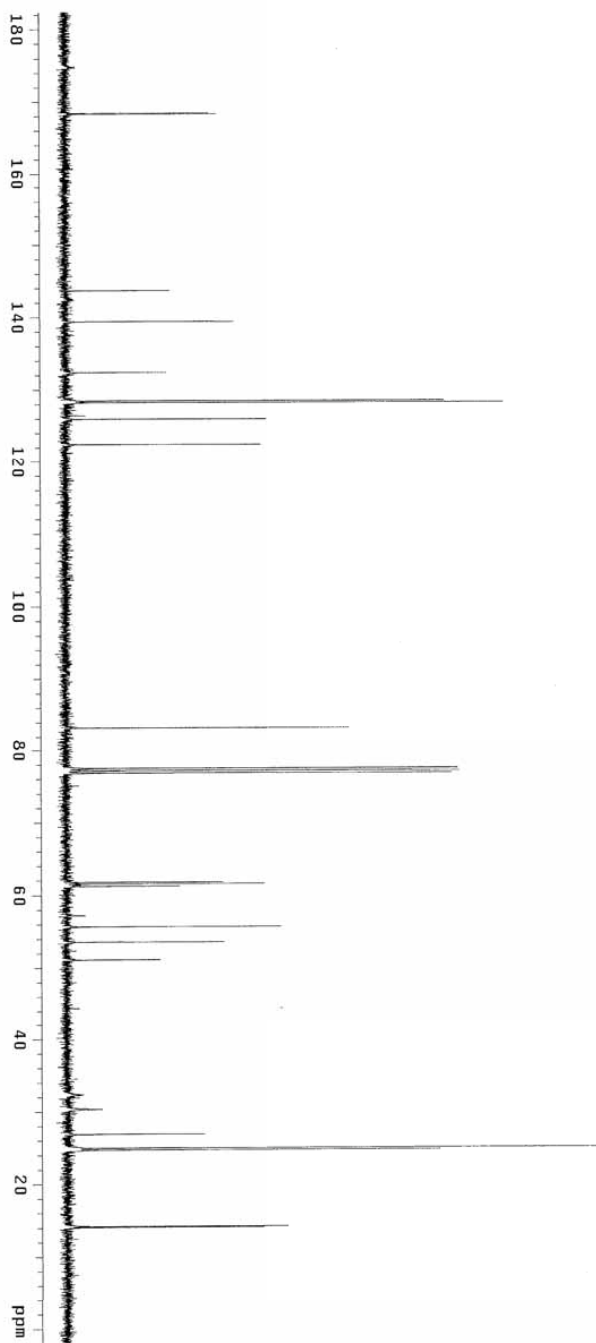

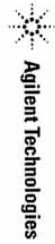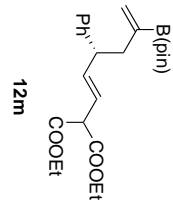

IR0-IV-111-c2  
after xylene  
12/15/15  
Sample Name:  
Data Collected on:  
nmr19-rmss600  
Archive directory:  
Sample directory:  
FIDFile: PROTON  
Pulse Sequence: PROTON (s2pm1)  
Solvent: cdcl3  
Data collected on: Dec 15 2015

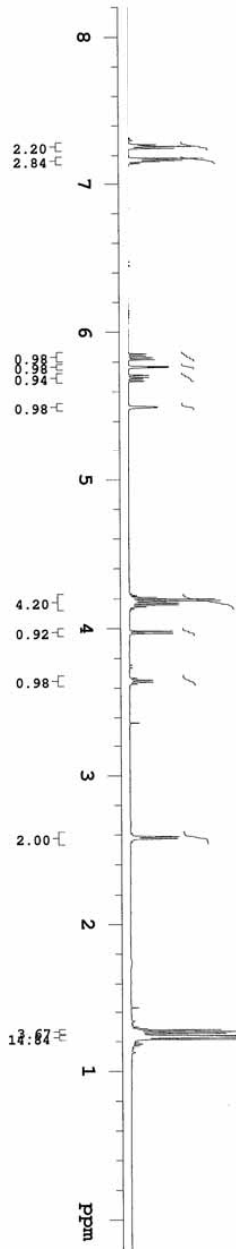

IRX-IV-111-c2  
after xylene  
12/15/15

Sample Name:  
FW-IX-112-CMR  
Data Collected on:  
mm19-vnmr600  
Archive directory:

Sample directory:

FIDFile: CARBON

Pulse Sequence: CARBON (s2pul)  
Solvent: cdcl3  
Data collected on: Dec 15 2015

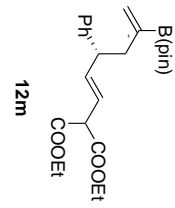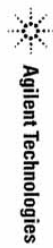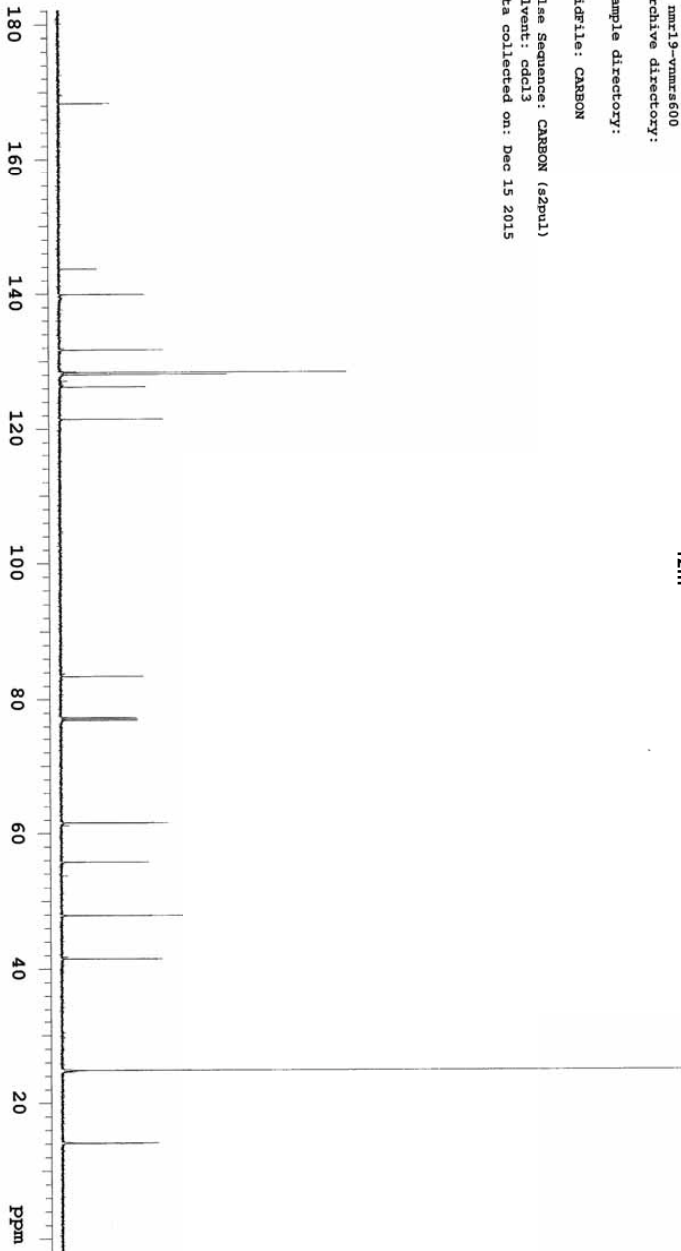



1KX-IV-124B-c  
12/23/15

Sample Name:  
FW-IX-112-ox  
Data Collected on:  
nmr13-vnmrs400  
Archive directory:

Sample directory:

Filefile: PROTON

Pulse Sequence: PROTON (zgpg3)  
Solvent: cdcl3  
Data collected on: Dec 23 2015

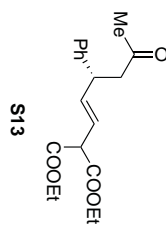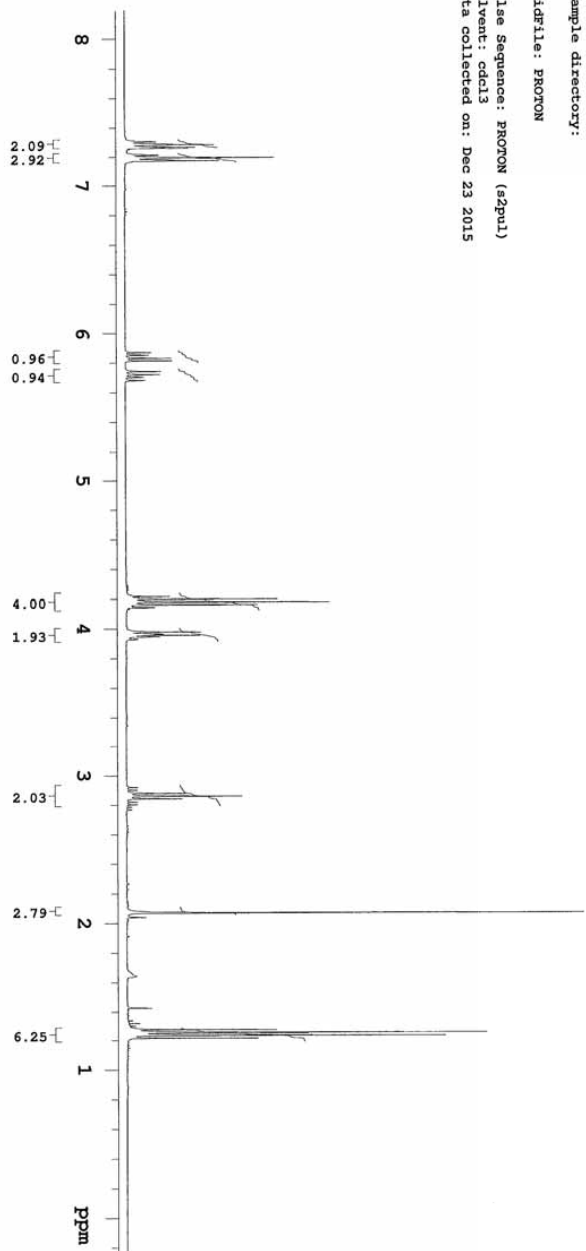

IKM-IV-124B-c  
12/23/15

Sample Name:  
EM-IX-112-ox  
Data Collected on:  
nmr13-vmmrs400  
Archive directory:

Sample directory:

FIDFile: CARBON

Pulse Sequence: CARBON (s2pul)  
Solvent: cdcl3  
Data collected on: Dec 23 2015

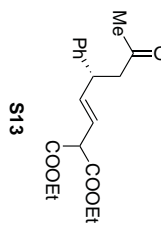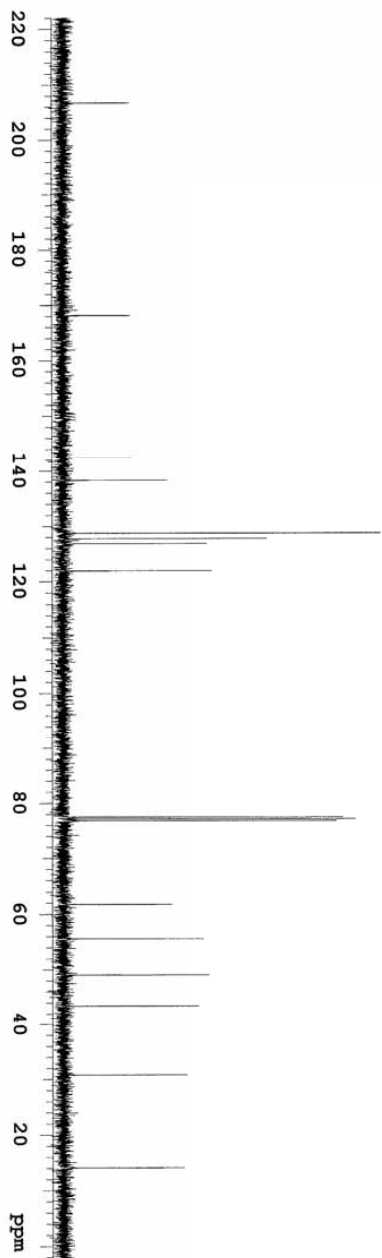



Sample Name: FM-IX-82  
Data Collected on: Vnmr13-Vnmr5400  
Archive directory:  
Sample directory:  
Fid file: CARBON  
Pulse Sequence: CARBON (szpu1)  
Solvent: cdcl3  
Data collected on: Oct 21 2015

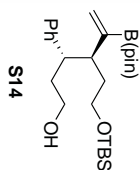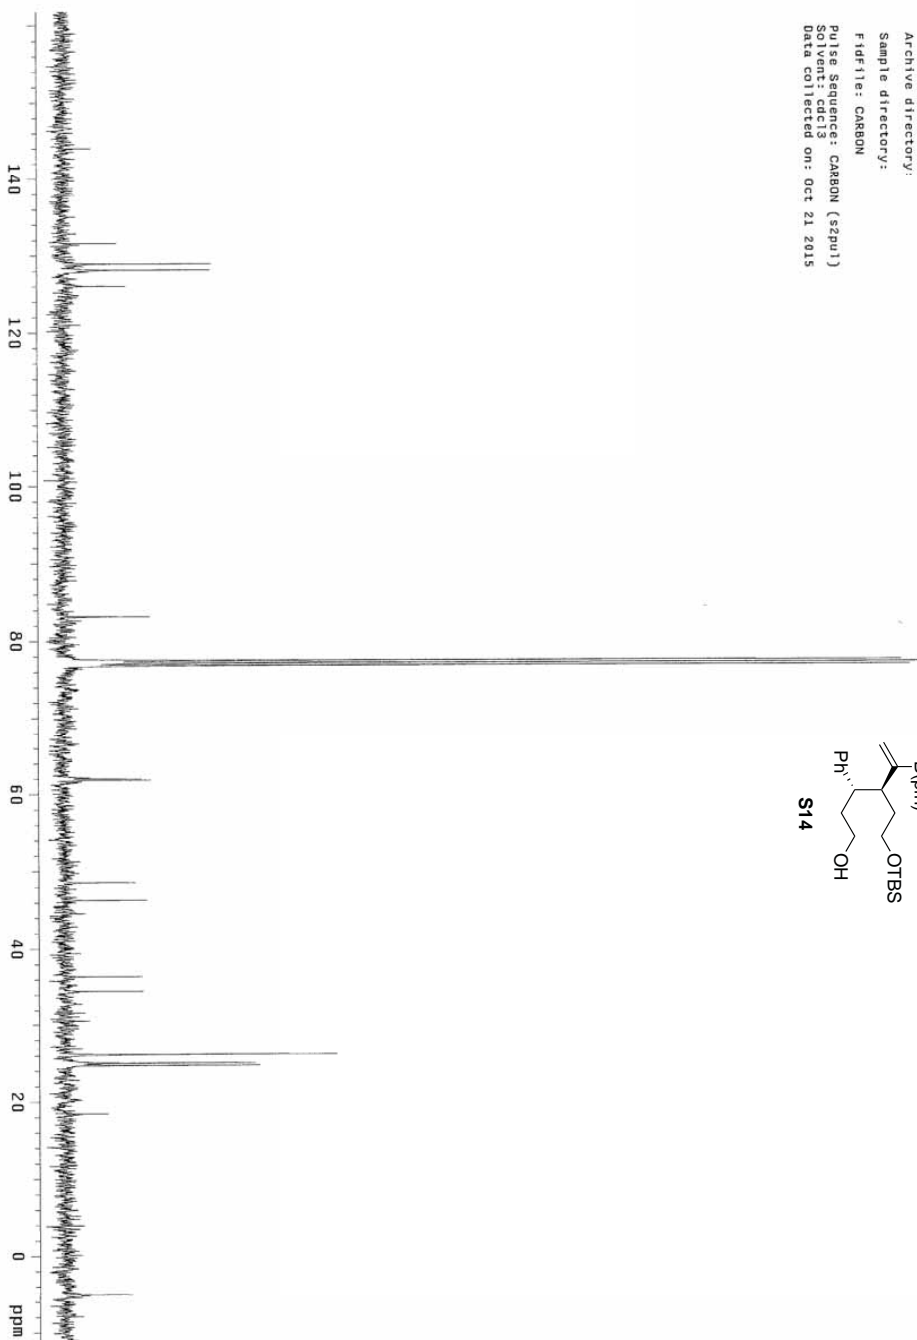

STANDARD PROTON PARAMETERS

Sample Name:  
Data Collected on:  
nmr13-vvmsr400  
Archive directory:  
Sample directory:  
FIDfile: PROTON  
Pulse Sequence: PROTON (szpu1)  
Solvent: cdcl3  
Data collected on: Feb 24 2016

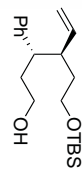

S15

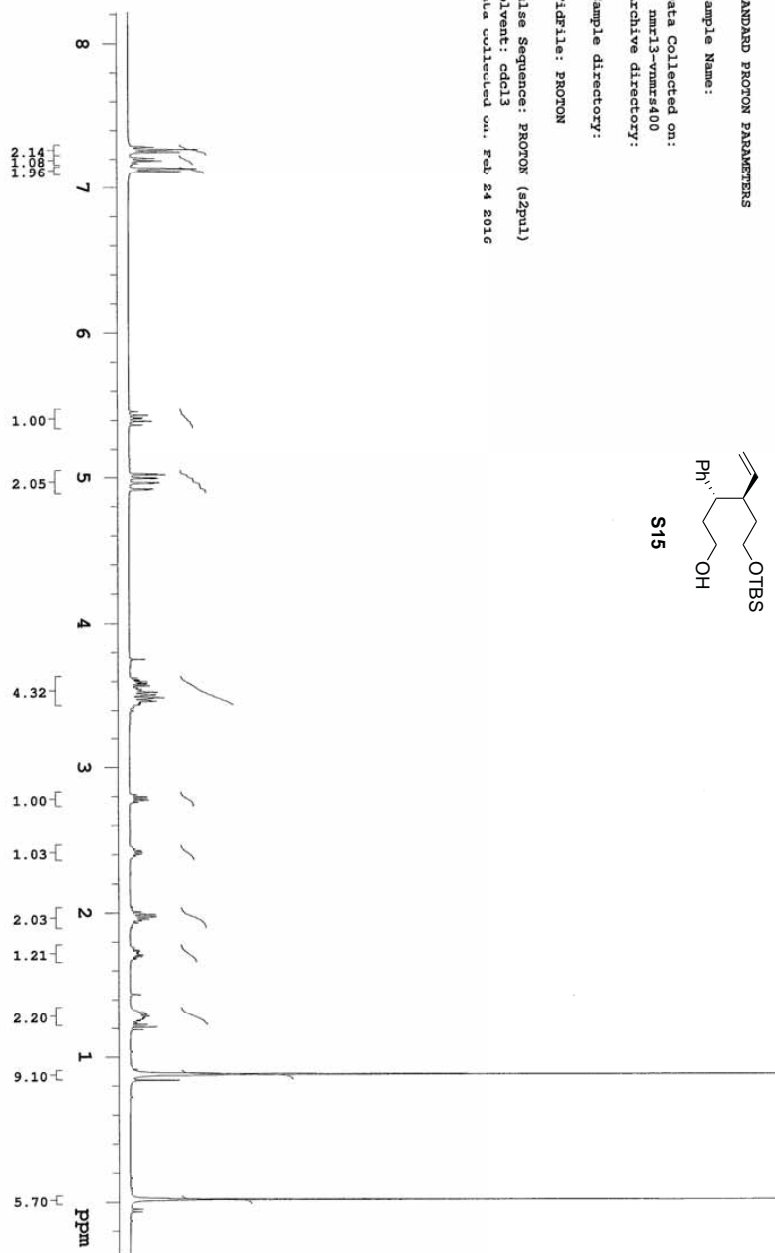

STANDARD PROTON PARAMETERS

Sample Name:  
Data Collected on: nmr13-ymms400  
Archive directory:  
Sample directory:  
FID file: CARBON  
Pulse Sequence: CARBON (szpnl)  
Solvent: cdcl3  
Date collected: Fri, Feb 24 2016

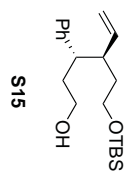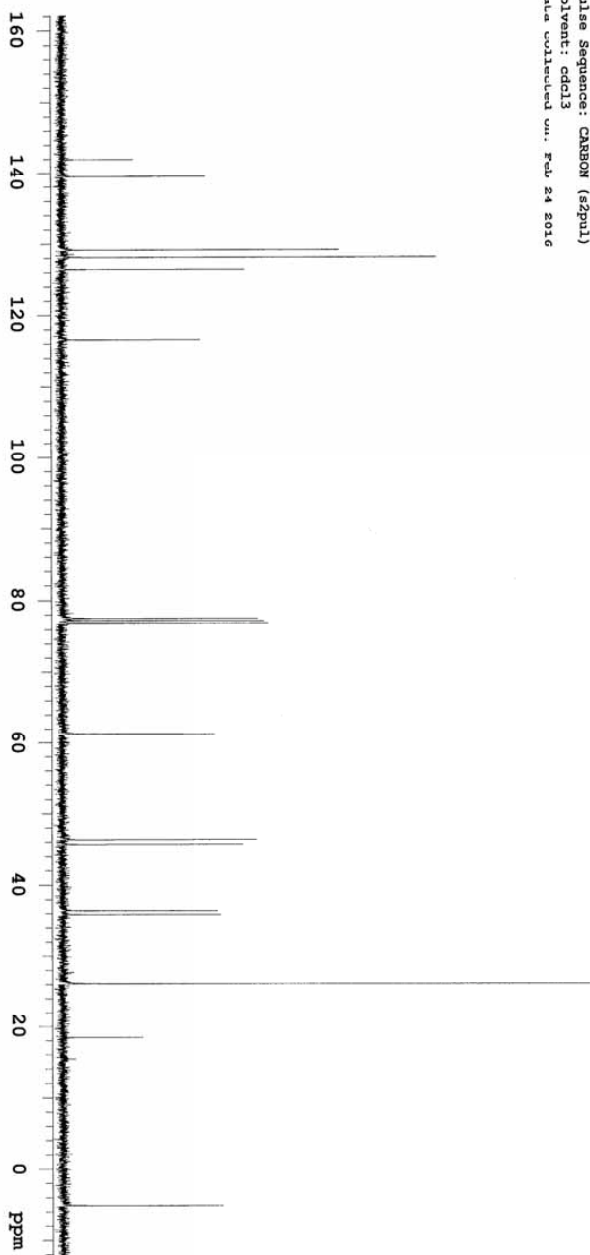

STANDARD FLUORESCENCE PARAMETERS

Sample Name:  
F4-IX-154  
Data Collected on:  
nmr14-vmr2400  
Archive directory:  
Sample directory:  
FIDFile: PROTON  
Pulse Sequence: PROTON (szpnl)  
Solvent: cdcl3  
Data collected on: Feb 22 2016

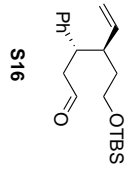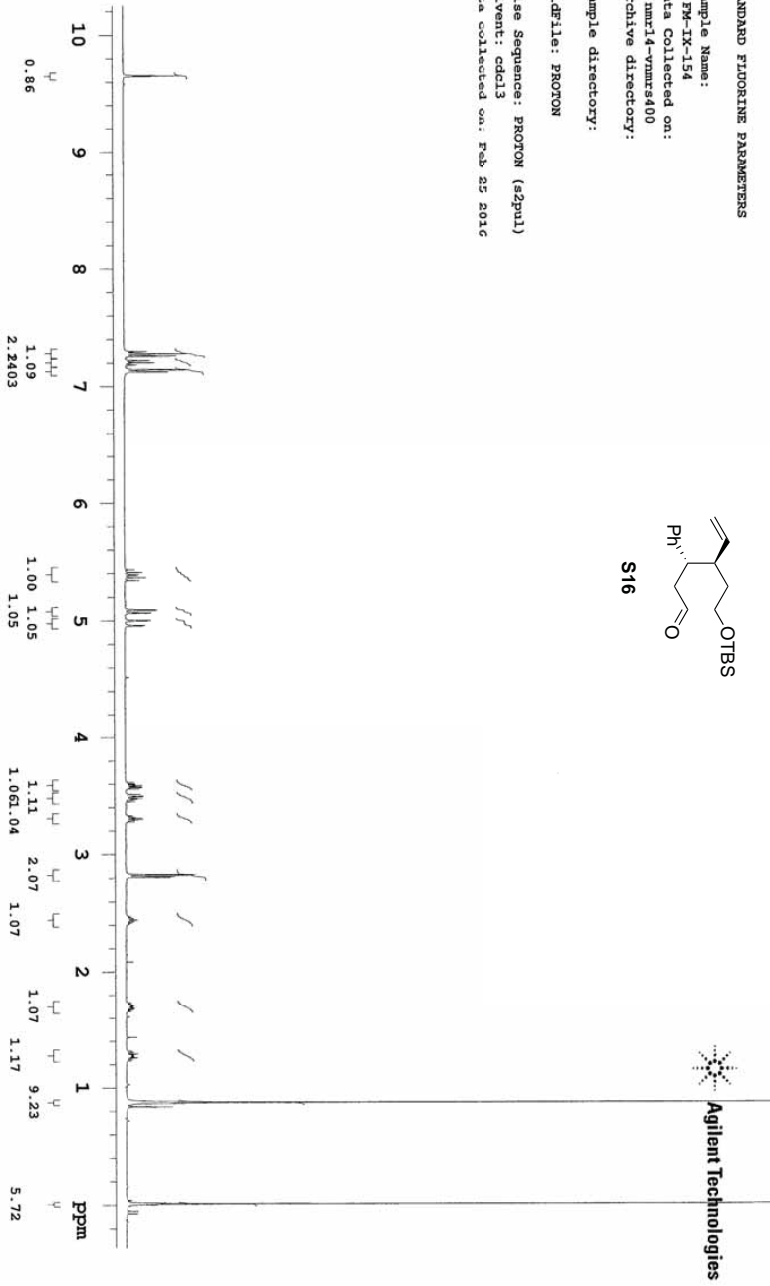

STANDARD FLUORINE PARAMETERS

Sample Name:  
Data Collected on: mmr14-mmrs400  
Archive directory:  
Sample directory:  
FIDFile: CARBON  
Pulse Sequence: CARBON (qzpu1)  
Solvent: cdcl3  
Date collected on: Feb 25 2016

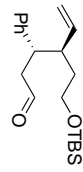

S16

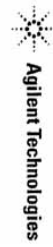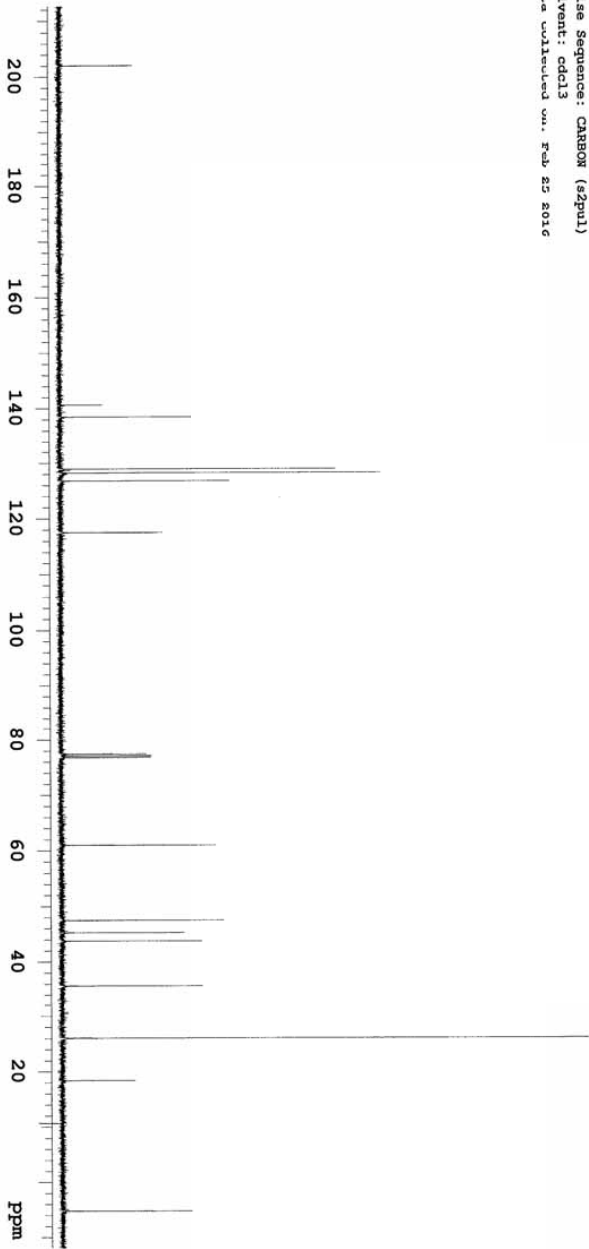



XCF-II-208-1

Sample Name:

FW-IX-157

Data Collected on:

nmr13-vnmrs400

Archive directory:

Sample directory:

File: PROTON

Pulse Sequence: PROTON (s2pul)

Solvent: cdcl3

Data collected on: Feb 29 2016

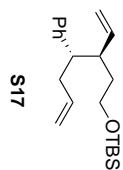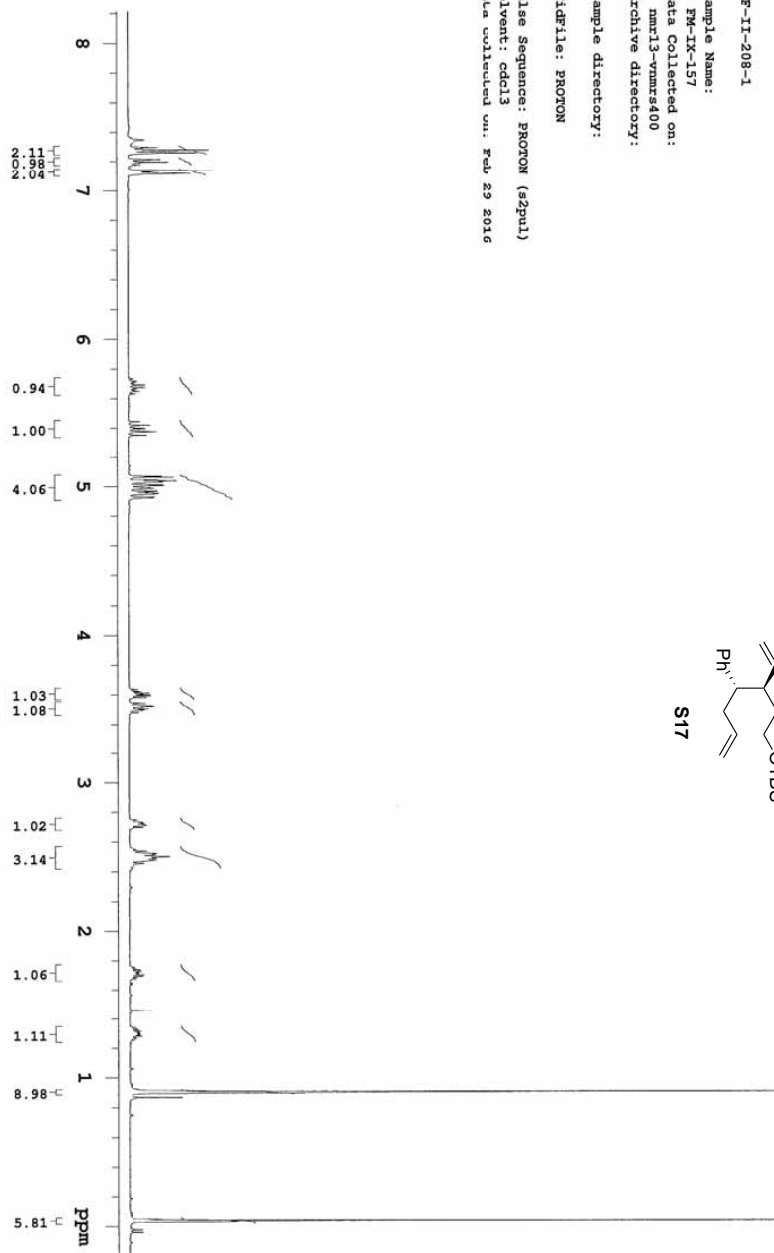

XCF-II-208-1

Sample Name:

FW-IX-157

Data Collected on:

nmr13-vmmr400

Archive directory:

Sample directory:

File: CARBON

Pulse Sequence: CARBON (s2pul)

Solvent: cdCl3

Data collected on: Feb 29 2016

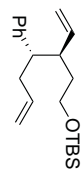

S17

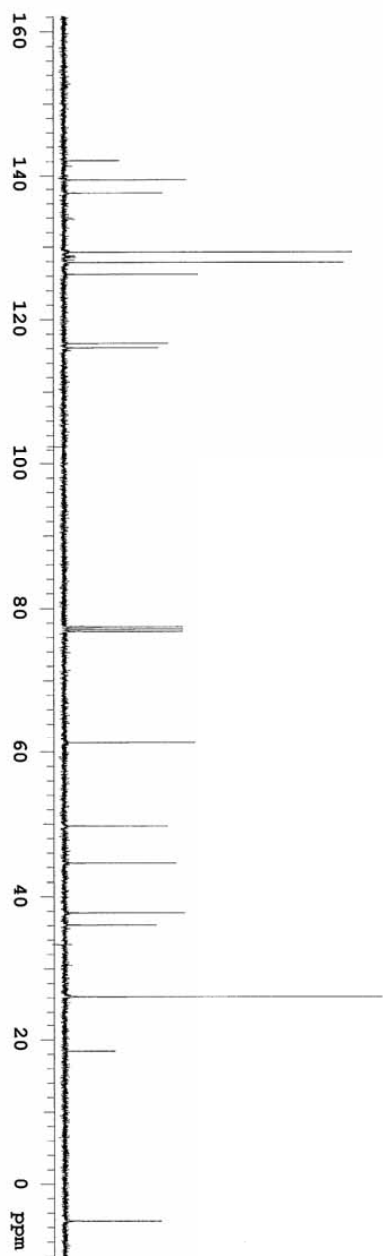

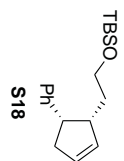

Sample Name:  
FW-IX-158  
Data Collected on:  
nmr13-vnmrs400  
Archive directory:  
Sample directory:  
FIDFile: PROTON  
Pulse Sequence: PROTON (s2pul)  
Solvent: cdcl3  
Date collected on: Mar 1 2016

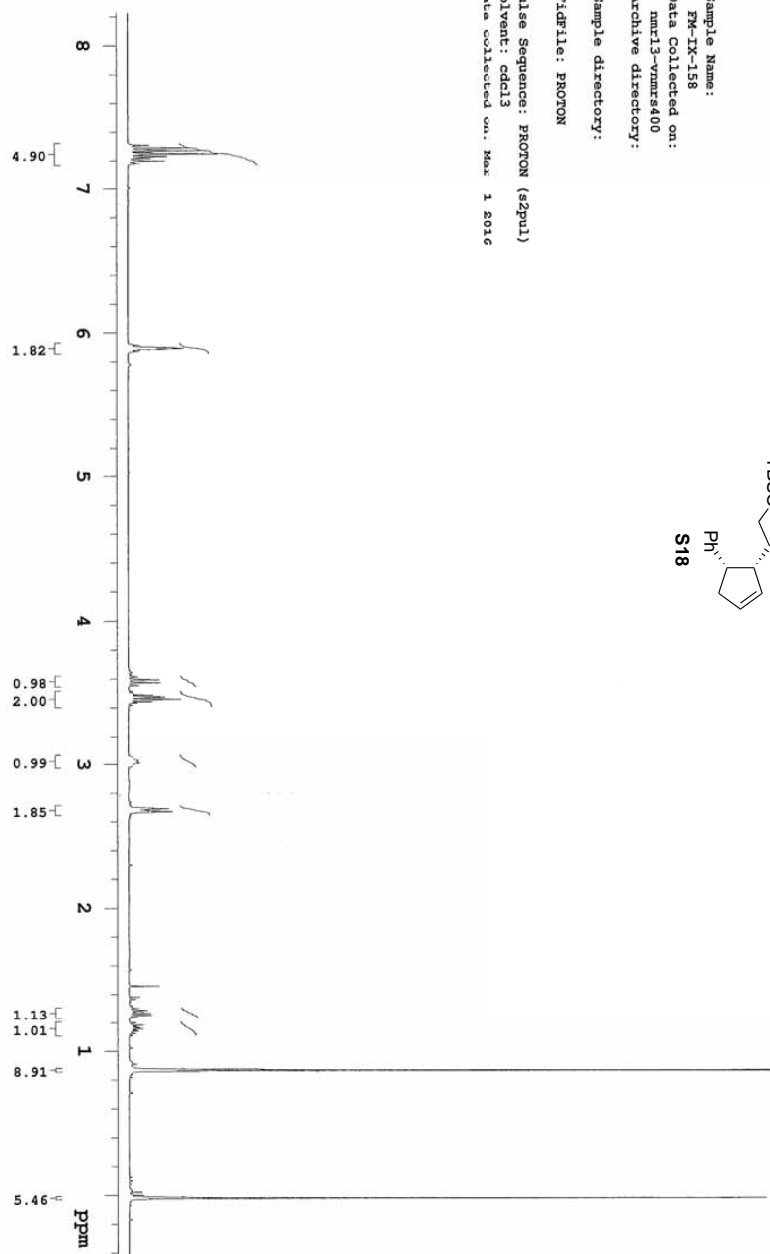

Sample Name:  
EM-IX-158  
Data Collected on:  
nmr13-vnmrs400  
Archive directory:  
Sample directory:  
F1dFile: CARBON

Pulse Sequence: CARBON (s2pu1)  
Solvent: cdcl3  
Data collected on: Mar 1 2016

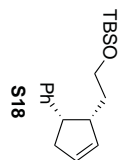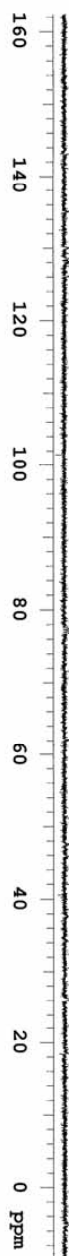

Selective band center: 3.00 (ppm); width: 69.1 (Hz)

Sample Name:

FK-IX-158

Data Collected on:

mmx13-vmmx400

Archive directory:

Sample directory:

FIDFile: NOESY1D

Pulse Sequence: NOESY1D

Solvent: cdcl3

Data collected on: Mar 1 2016

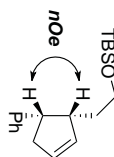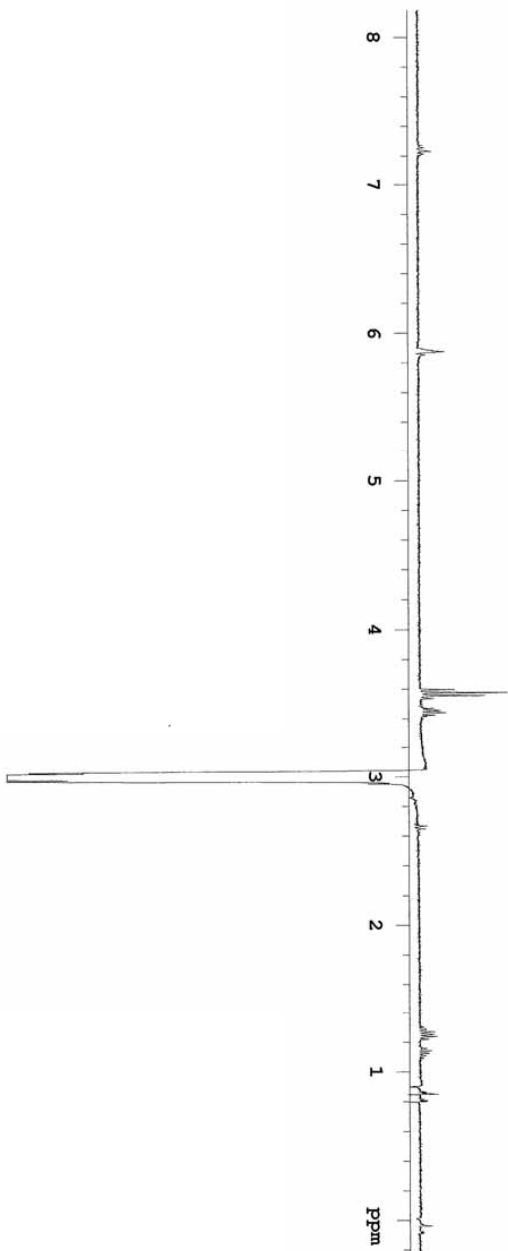

Selective band center: 3.00 (ppm); width: 69.1 (Hz)  
Selective band center: 3.58 (ppm); width: 60.4 (Hz)

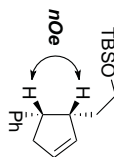

Sample Name:  
FW-IX-158  
Data Collected on:  
mmr13-vmmr400  
Archive directory:  
Sample directory:

File: N05Y1D  
Pulse Sequence: N05SYD  
Solvent: cdcl3  
Data collected on: Mar 1 2016

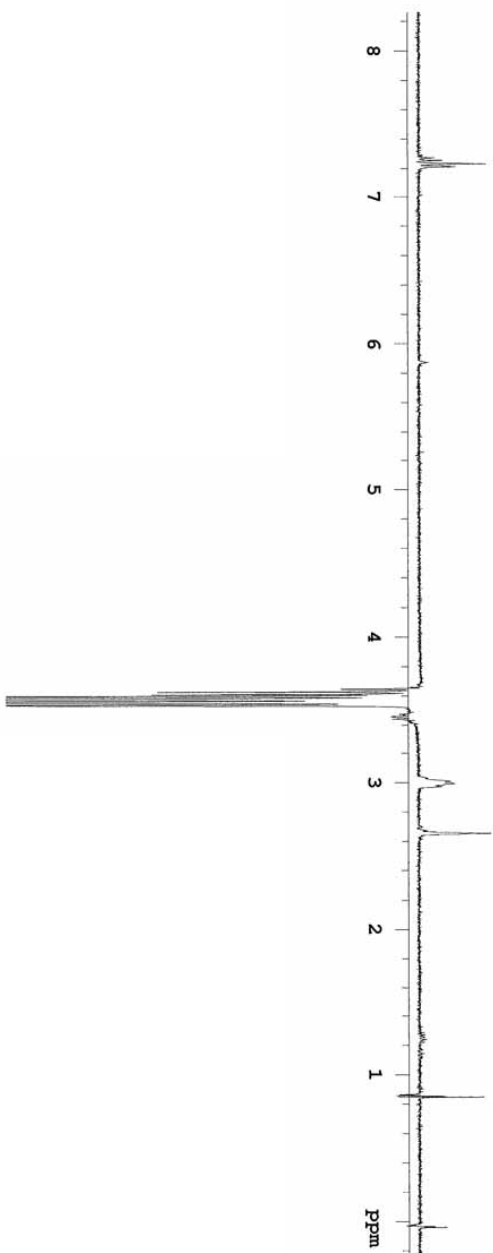

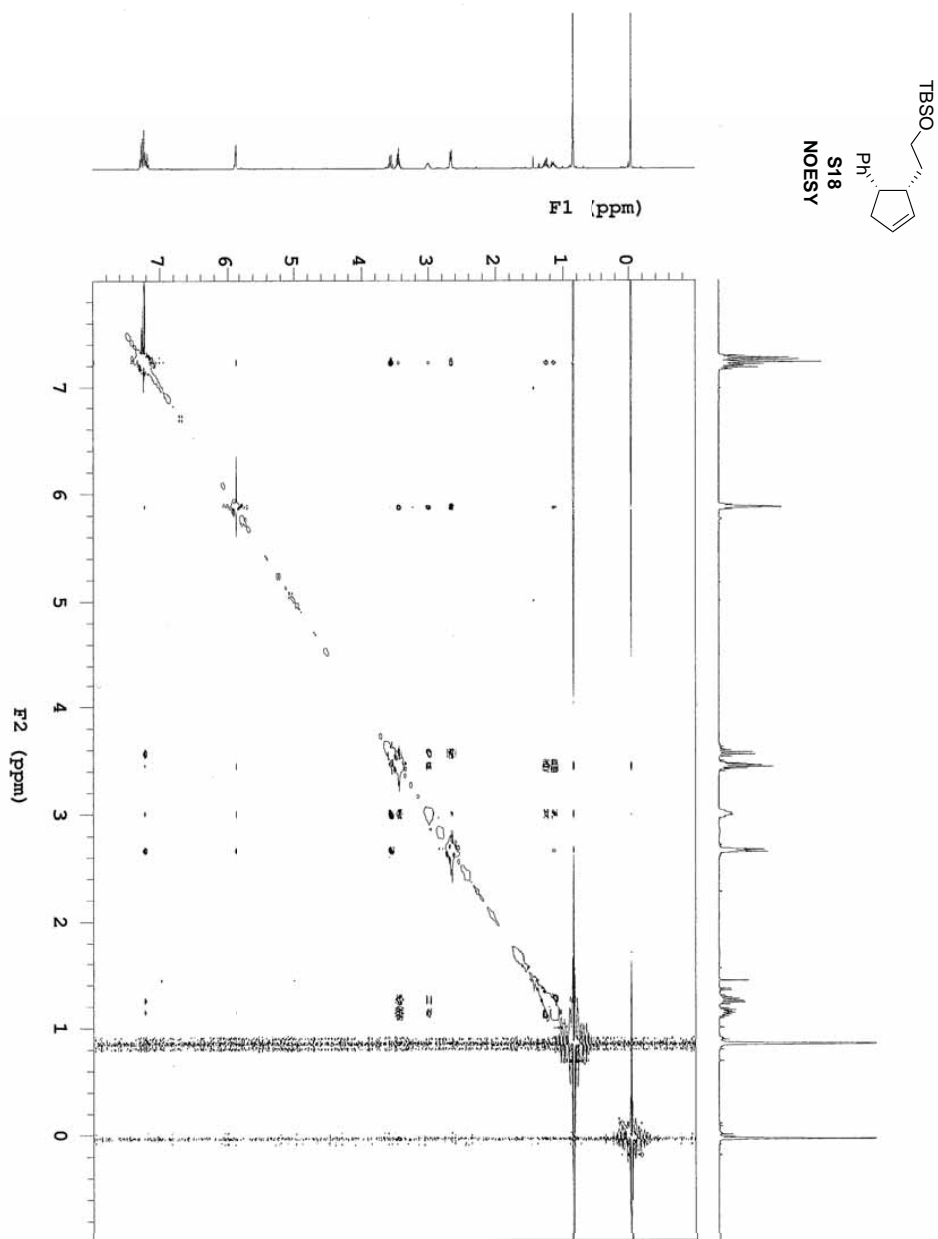

Sample Name: F4-0111-2520  
Date Collected: 08/11/2015  
vnmr13-vnmrs400  
Archive directory:  
Sample directory:  
Fid file: PROTON  
Pulse Sequence: PROTON (s2pu1)  
Solvent: cdcl3  
Data collected on: Jul 1 2015

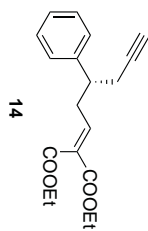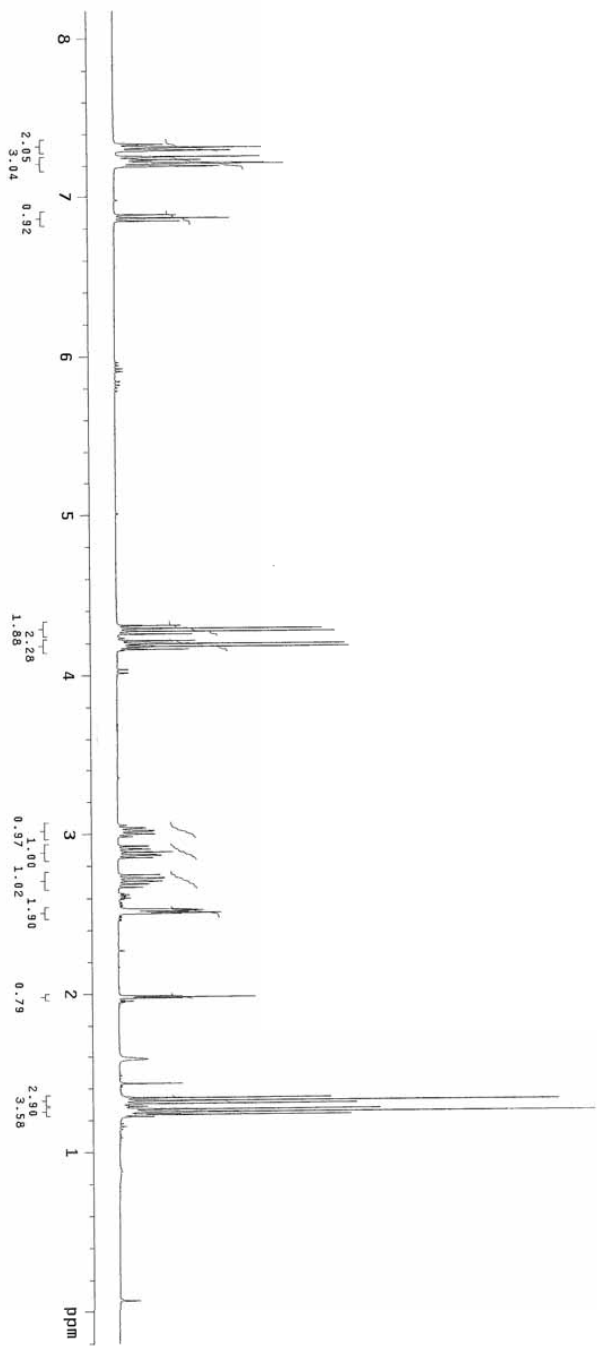



Sample Name: sp  
FW-011-2520  
Date Collected: 01/11/2015  
vnmr13-vnmr5400  
Archive directory:  
Sample directory:  
Fid file: CARBON  
Pulse Sequence: CARBON (s2pu1)  
Solvent: cdcl3  
Data collected on: Jul 1 2015

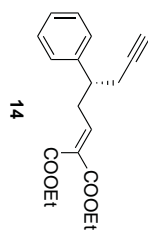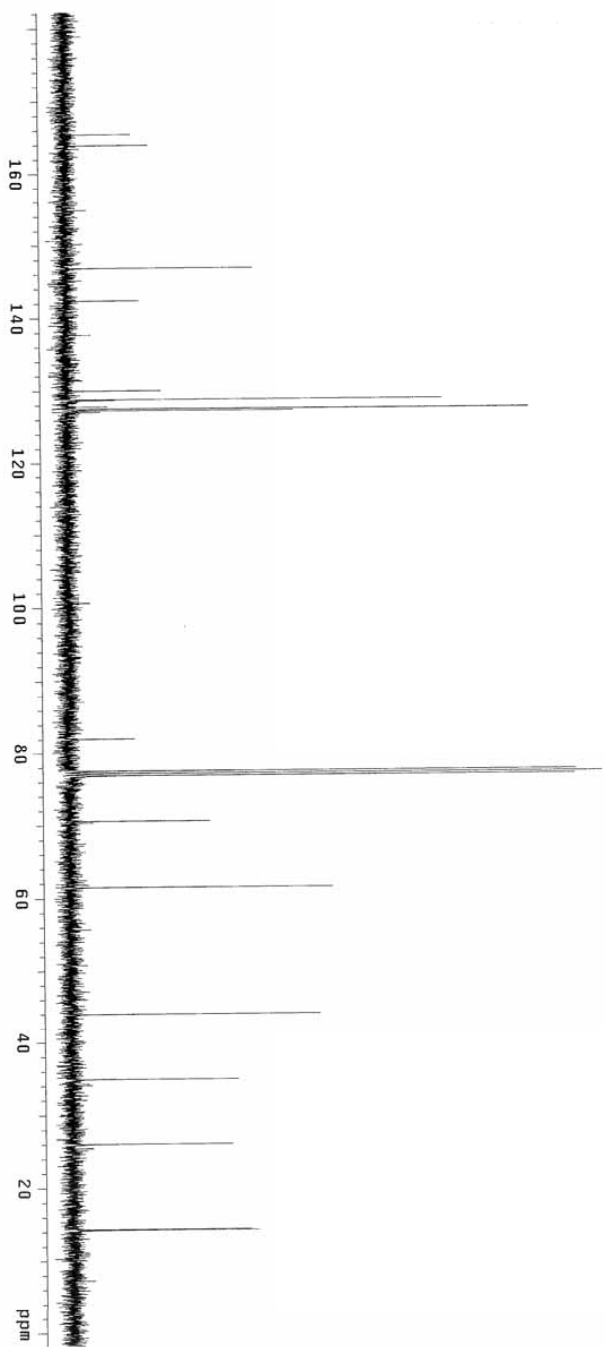

Sample Name:  
p-1-VT17238  
Data Collected on:  
vnmr13-vnmr5400  
Archive directory:  
Sample directory:  
FIDFile: PROTON  
Pulse Sequence: PROTON (s2pu1)  
SOLVENT: CDCl3  
Data collected on: Jun 17 2015

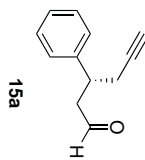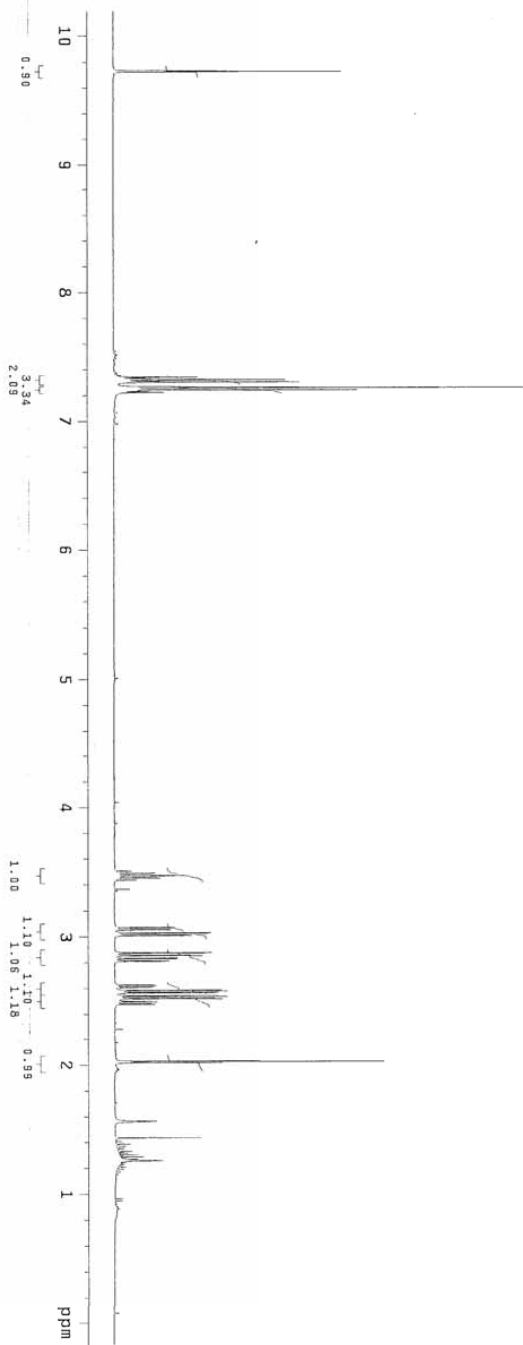

Sample Name: 15a  
Date Collected: vnmr3-vmr-840  
Archive directory:  
Sample directory:  
Fidfile: CARBON  
Pulse Sequence: CARBON (szpu1)  
Solvent: cdcl3  
Data Collected on: Jun 17 2015

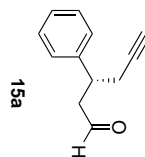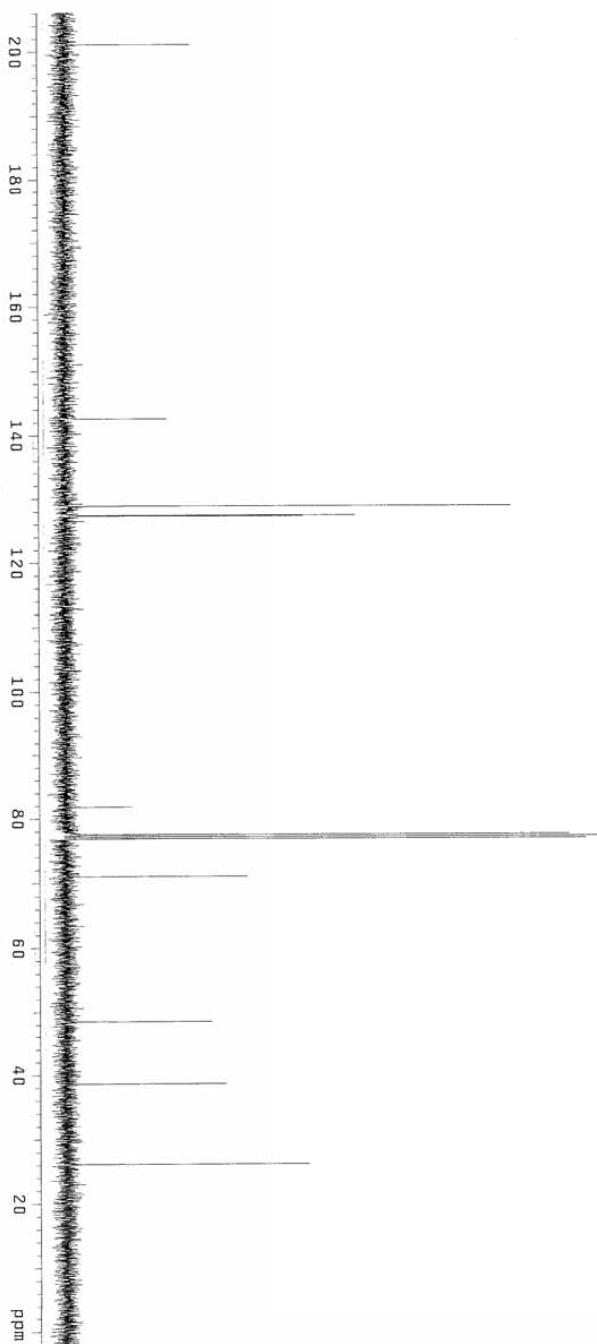

FW-2X-40  
~~FW-2X-40~~  
Sample Name: ~~FW-2X-40~~  
Date Collected on: ~~9/11/2015~~  
Vnmr13-vnmrs400  
Archive directory:  
Sample directory:  
FID File: PROTON  
Pulse Sequence: PROTON (sgpu1)  
S11111111  
Data collected on: Sep 11 2015

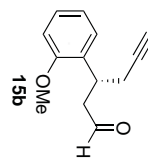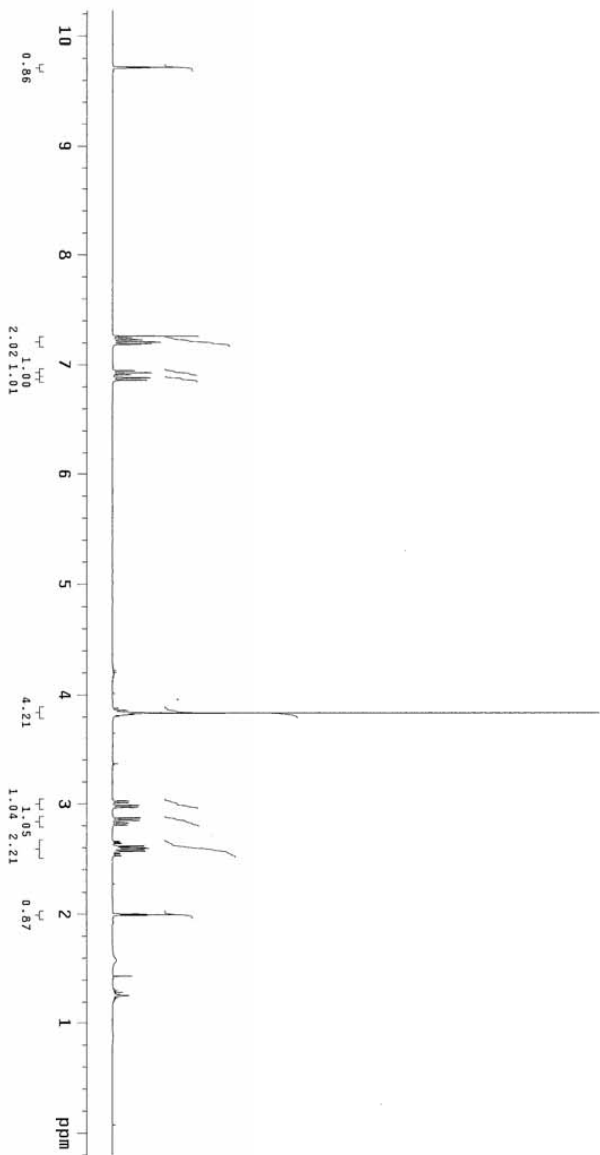

~~FM-17-40~~  
FM-17-40

Sample Name: ~~FM-17-40~~  
Data Collected on: vnmr-13-vnmr5400  
Archive directory:   
Sample directory:   
F1df file: CARBON  
Pulse Sequence: CARBON (s2pul)  
SI  
Data collected on: Sep 11 2015

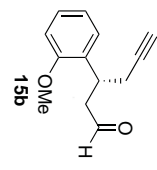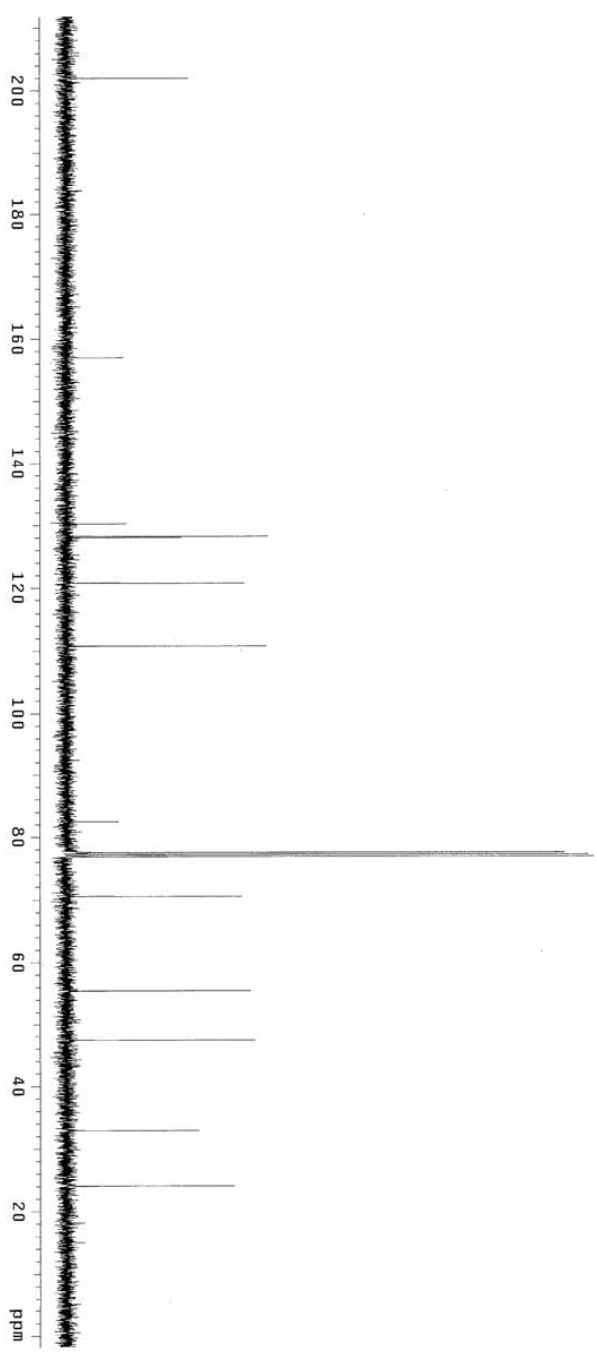

Sample Name:  
File: 15c-1  
Date Collected on:  
Vnmr13-vnmr5400  
Archive directory:  
Sample directory:  
FidFile: PROTON  
Pulse Sequence: PROTON (szpu1)  
Solvent: H<sub>2</sub>O  
Date Collected on: Sep 3 2015

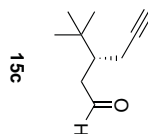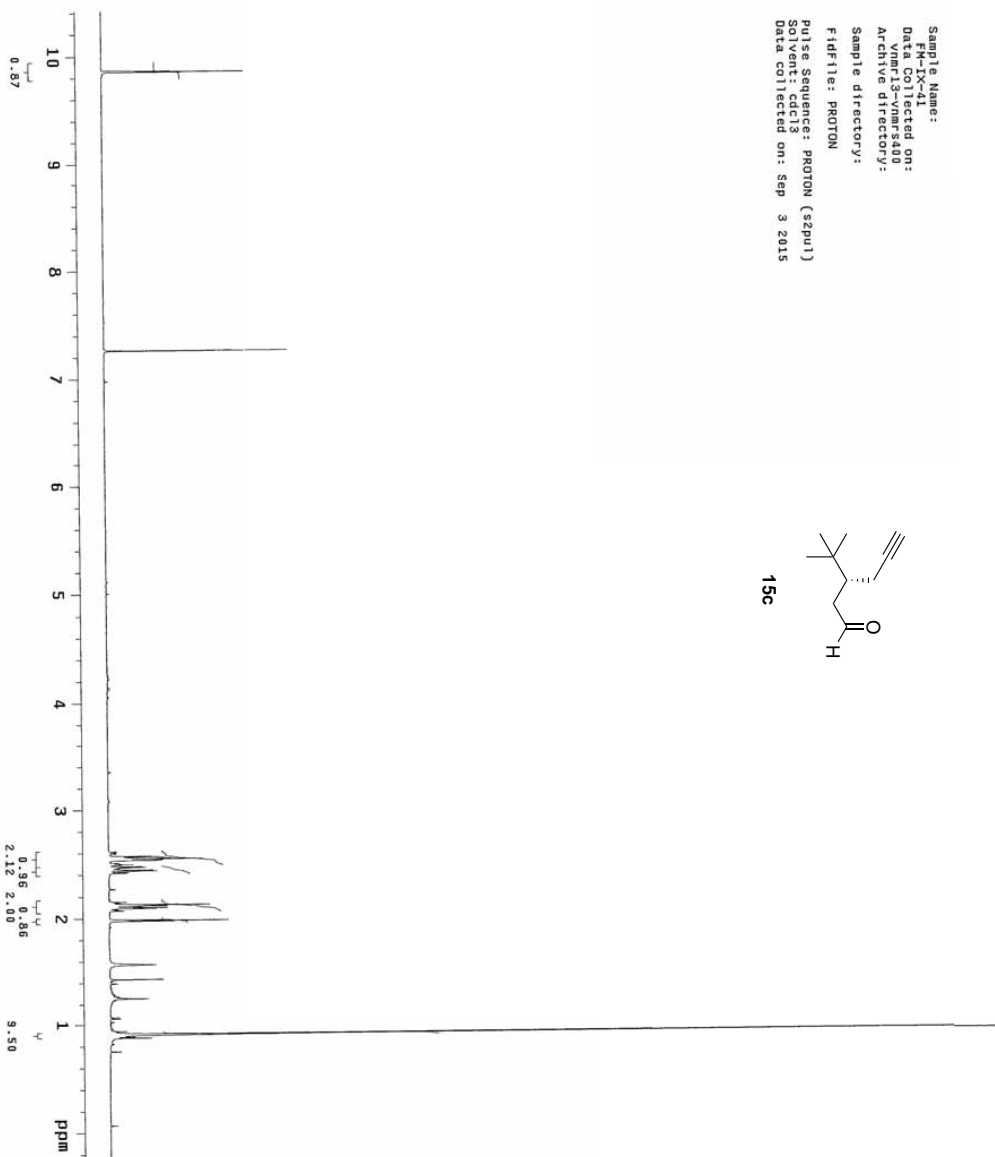

Sample Name:  
Date Collected on:  
vnmr13-vnmr540  
Archive directory:  
Sample directory:  
FIDFile: CARBON  
Pulse Sequence: CARBON (s2pu1)  
Data collected on: Sep 3 2015

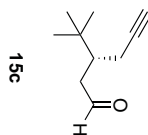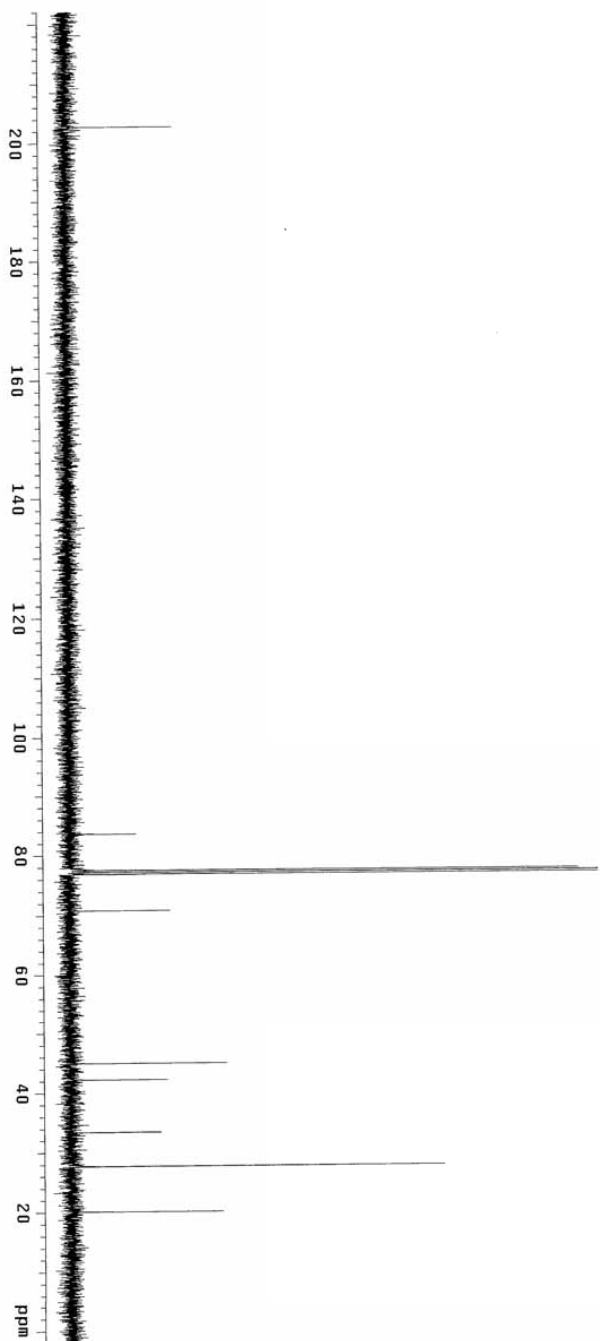

Sample Name:  
Data Collected on:  
vnmr13-vnmr5400  
Archive directory:  
Sample directory:  
FIDFile: PROTON  
Pulse Sequence: proton (zgpg3)  
Solvent: dcd13  
Data collected on: Sep 3 2015

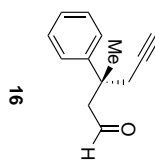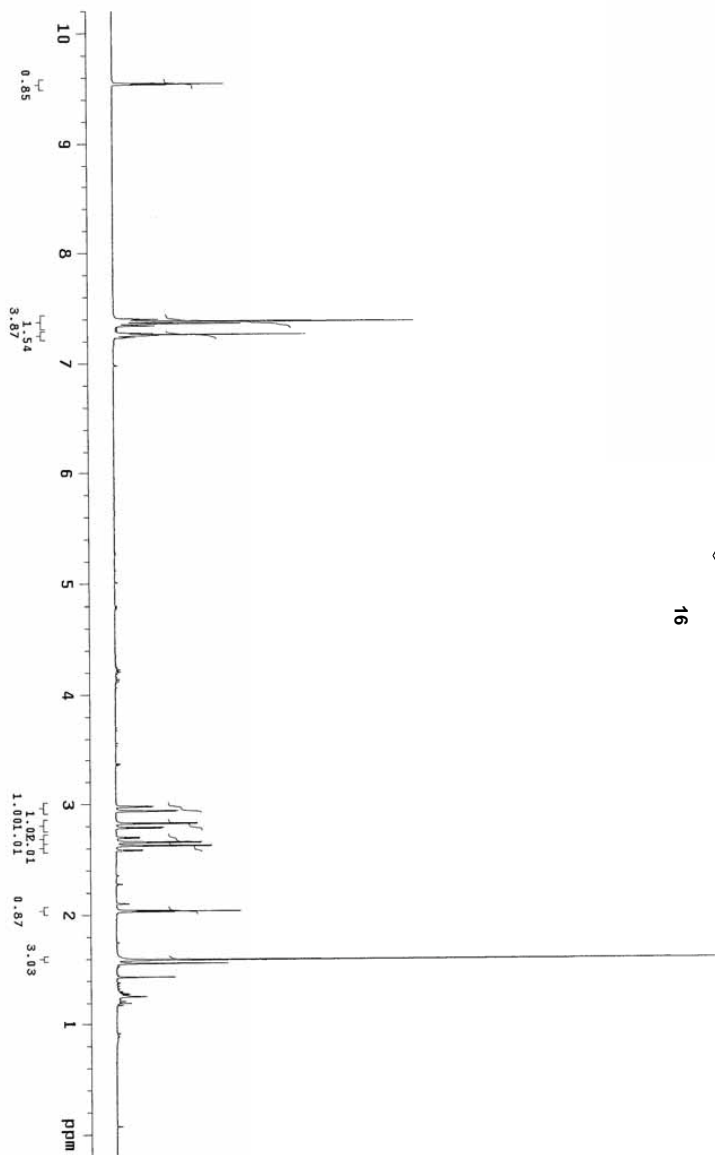



Sample Name: 16  
Data Collected on: 9/3/2015  
Vnmr13-vnmr-s400  
Archive directory:  
Sample directory:  
F1file: CARBON  
Pulse Sequence: CARBON (szpu1)  
Sweep range: 120-210  
Data collected on: Sep 3 2015

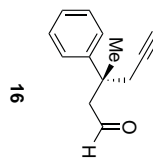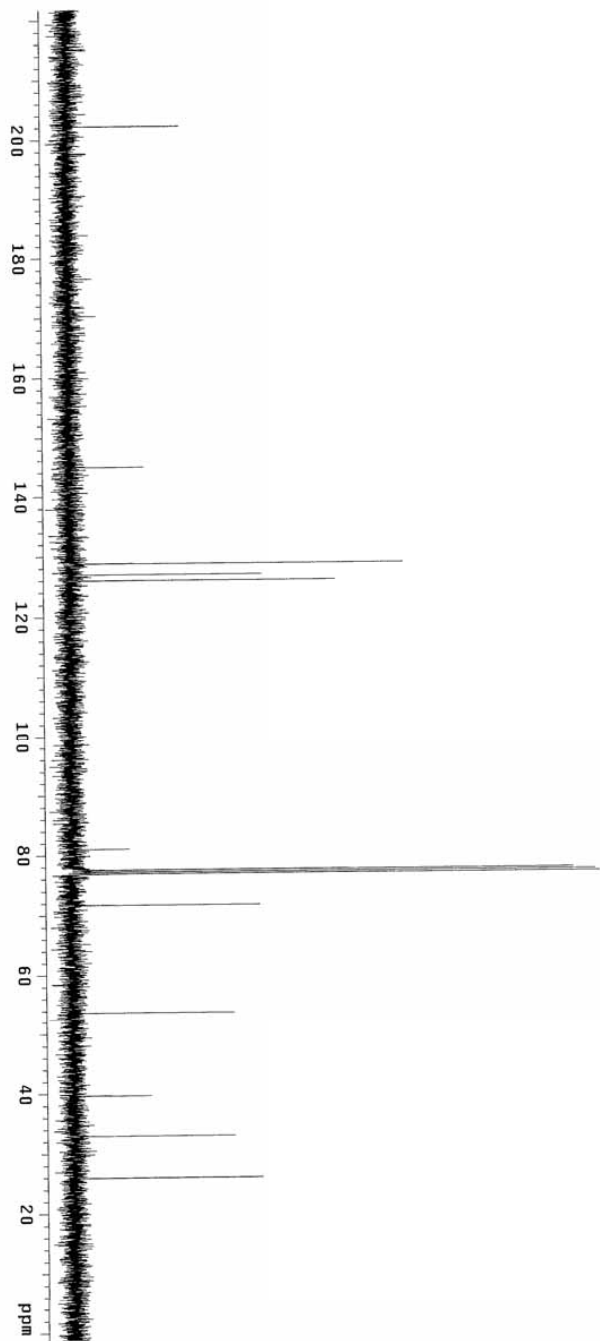

Sample Name: FM-IX-32  
Data Collected on: vnmr13-vnmr400  
Archive directory:  
Sample directory:  
F1df11: PROTON  
Pulse Sequence: PROTON (zgpg1)  
Solvent: cdcl3  
Data collected on: Aug 28 2015

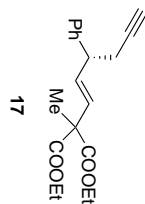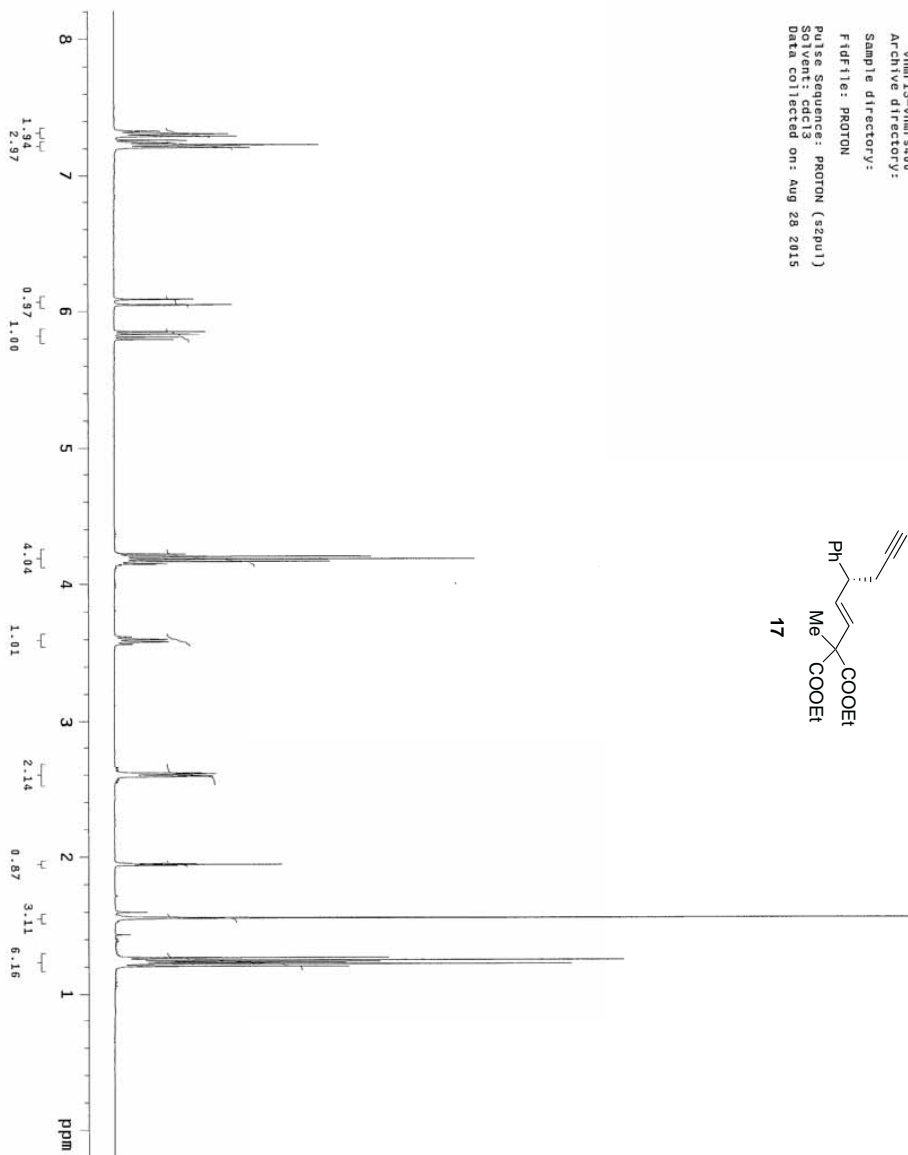

Sample Name:  
PH-EX-32  
Data Collected on:  
vnmr13-vnmr3400  
Archive directory:  
Sample directory:  
Fidfile: CARBON  
Pulse Sequence: CARBON (zgpg1)  
Solvent: CDCl3  
Data collected on: Aug 28 2015

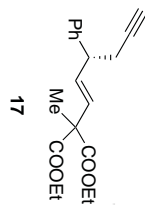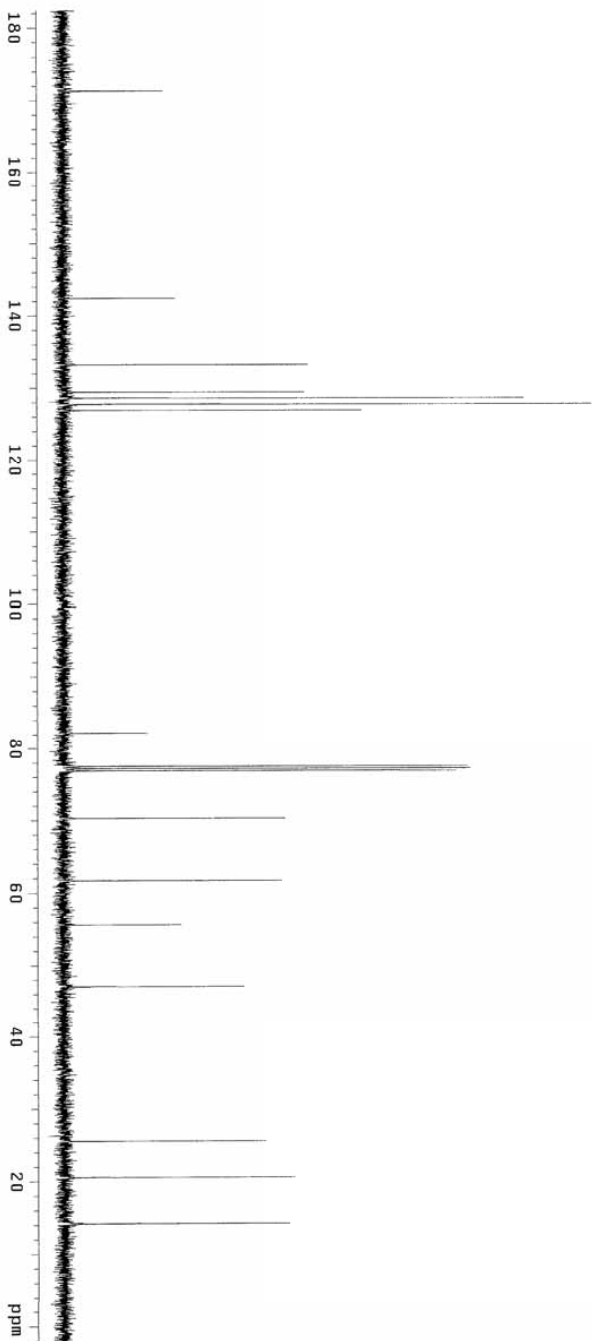

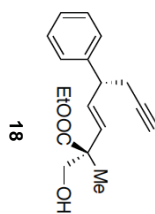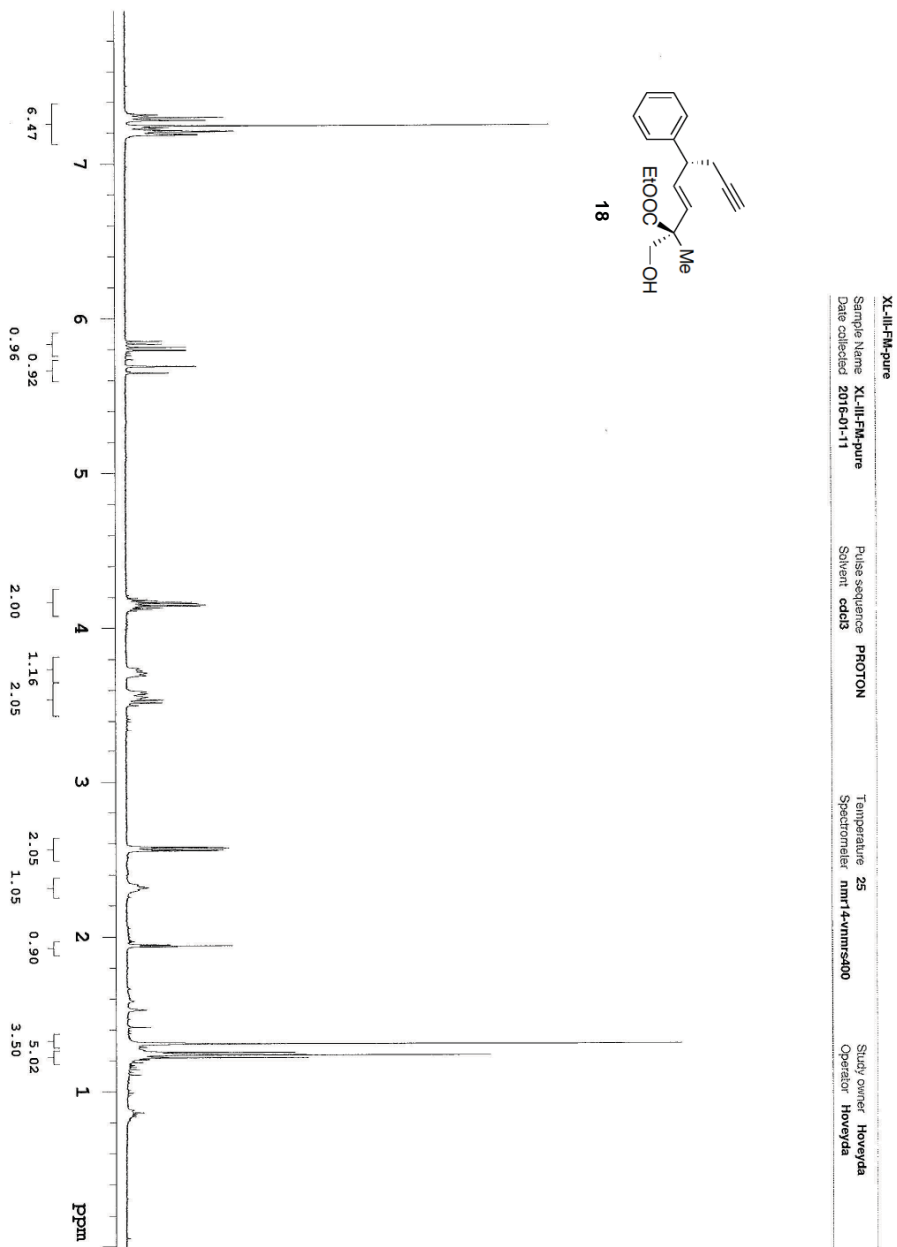

Data file name:Hovoyda\nmr\data\1\_XB\XL-II-FM-pure.fid

Plot date 2016-02-15

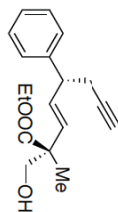

18

XL1JL-FM-pure-C

|                |                 |                |        |              |              |             |       |
|----------------|-----------------|----------------|--------|--------------|--------------|-------------|-------|
| Sample Name    | XL1JL-FM-pure-C | Pulse sequence | CARBON | Temperature  | 25           | Study owner | mengf |
| Date collected | 2015-01-12      | Solvent        | cds3   | Spectrometer | nm13-vnmr400 | Operator    | mengf |

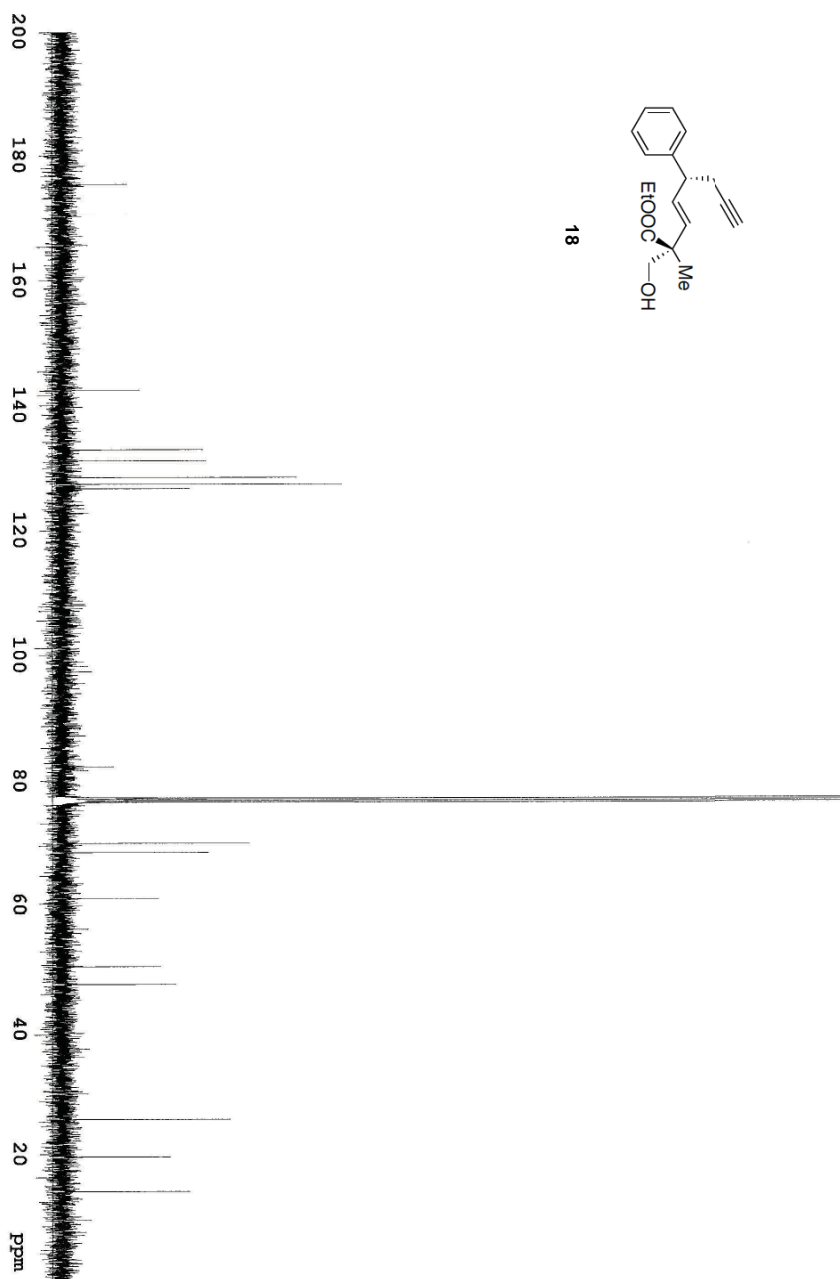

Data file: from:elshrxibentxL\_110XL1JL-FM-pure-C.fid

Plot date: 2015-02-15

RM3-205B-1H  
columned 100:1 Hex/Et

Sample Name:  
FM-IX-159  
Data Collected on:  
mm14-rmmcs400  
Archive directory:  
Sample directory:

File: PROTON

Pulse Sequence: PROTON (s2pul)  
solvent: cdcl3  
Data collected on: Mar 16 2016

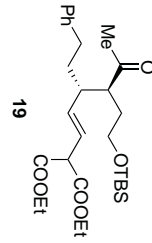

Agilent Technologies

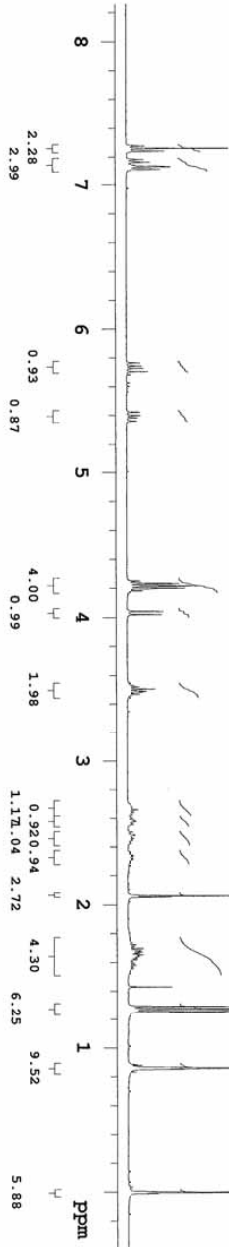

CG01-48-1H  
crude

Sample Name:  
FM-IX-159  
Data Collected on:  
nmr19-nmr3600  
Archive directory:  
Sample directory:

F1dfile: CARBON

Pulse Sequence: CARBON (szpu1)  
Solvent: cdcl3  
Data collected on: Mar 16 2016

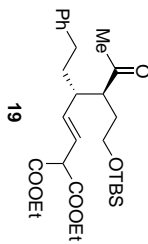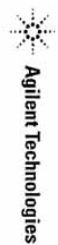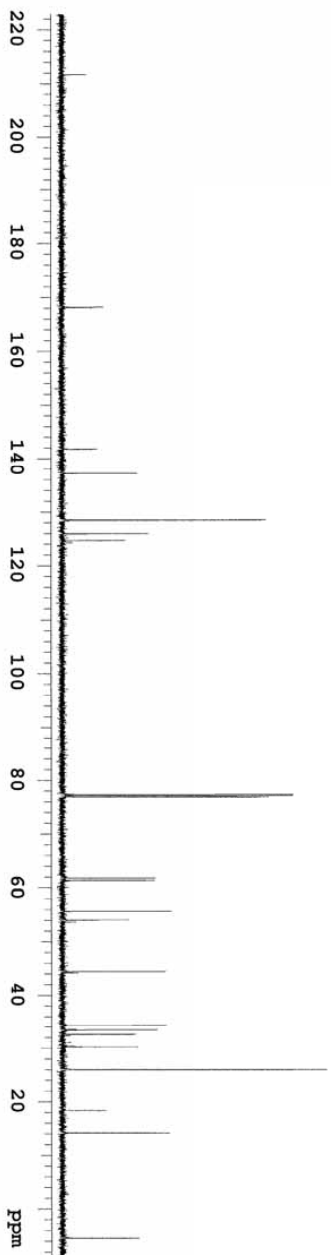

STANDARD FLUORINE PARAMETERS

Sample Name: FW-IX-94  
Data Collected on: mmi3-vmr400  
Archive directory:  
Sample directory:  
FIDFile: PROTON  
Pulse Sequence: PROTON (s2pul)  
Solvent: cdcl3  
Data collected on: Nov 11 2015

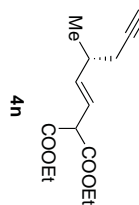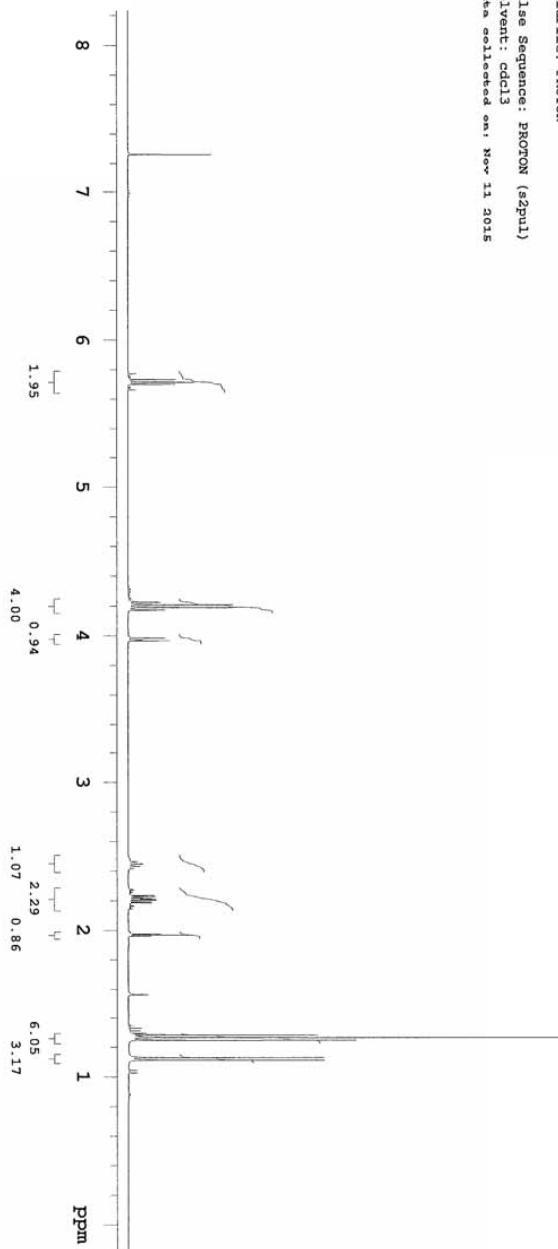



Sample Name: FK-IX-94  
Data Collected on: 11/15/2015 14:44  
Archive directory:  
Sample directory:  
Fid file: CARBON  
Pulse Sequence: CARBON (s2pu1)  
Solvent: cdcl3  
Data collected on: Nov 5 2015

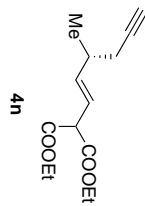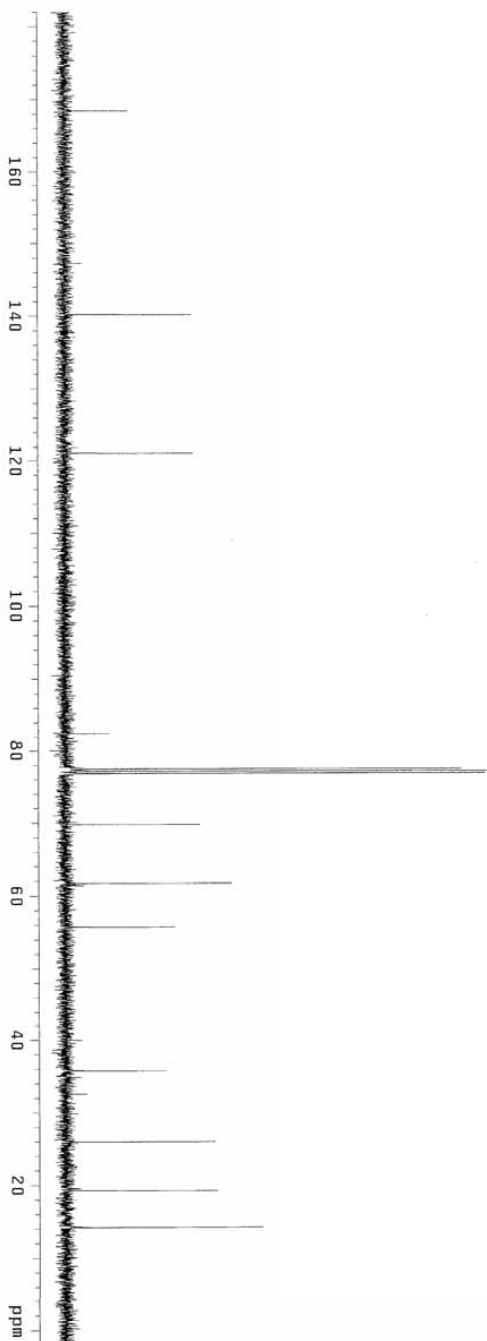

EW-4-119-A-fract1-12

Sample Name:

EW-IX-101

Data Collected on:

mar13-vmr400

Archive directory:

Sample directory:

F1DF1le: PROTON

Pulse Sequence: PROTON (s2pu1)

Solvent: cdcl3

Data collected on: Nov 16 2015

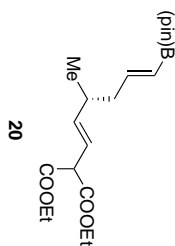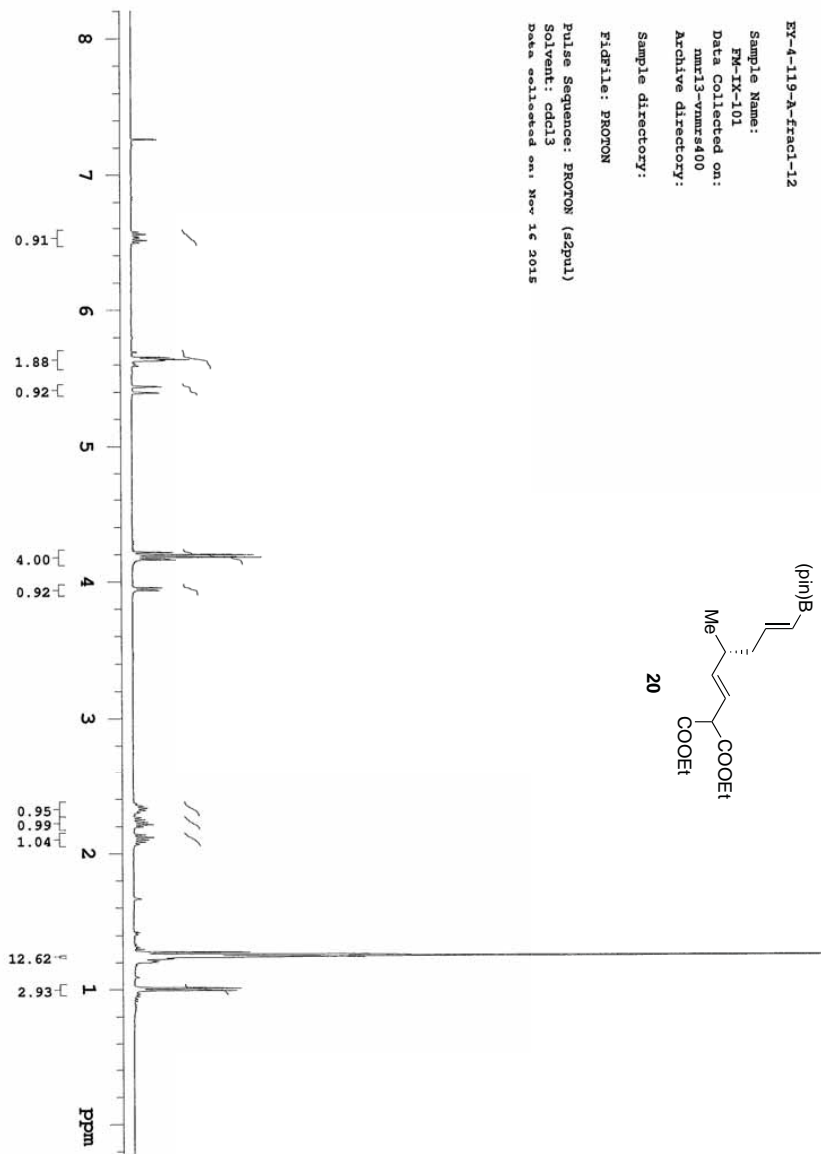

Ex-4-119-A-fract-12  
Sample Name:  
FM-IX-101  
Data Collected on:  
mm13-vmr8400  
Archive directory:  
Sample directory:  
FIDFile: CARBON

Pulse Sequence: CARBON (szpu1)  
Solvent: cdcl3  
Data collected on: Nov 16 2013

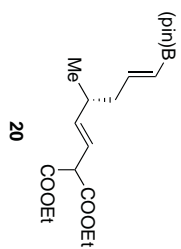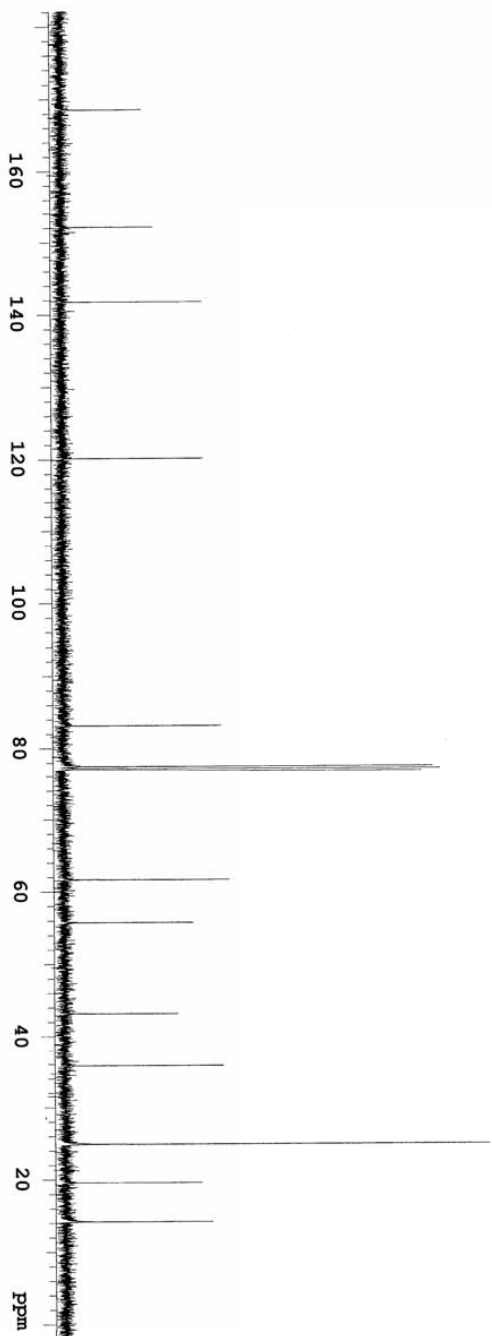

XCF-11-81-22  
Sample Name:  
F4-IX-102  
Data Collected on:  
nmr13-vmwrs400  
Archive directory:  
Sample directory:  
FIDFile: PROTON

Pulse Sequence: PROTON (q2pu1)  
Solvent: cdcl3  
Data collected on: Nov 20 2015

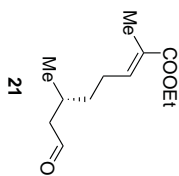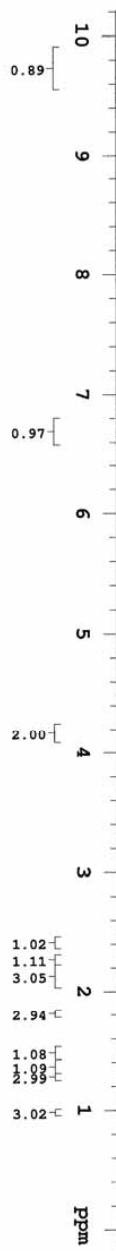

XCF-I1-81-22

Sample Name:  
PM-IX-102  
Data collected on:  
nmr13-vmmrs400  
Archive directory:  
Sample directory:

FIDFile: CARBON

Pulse Sequence: CARBON (szpu1)  
Solvent: cdcl3  
Data collected on: Nov 20 2015

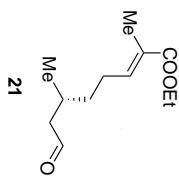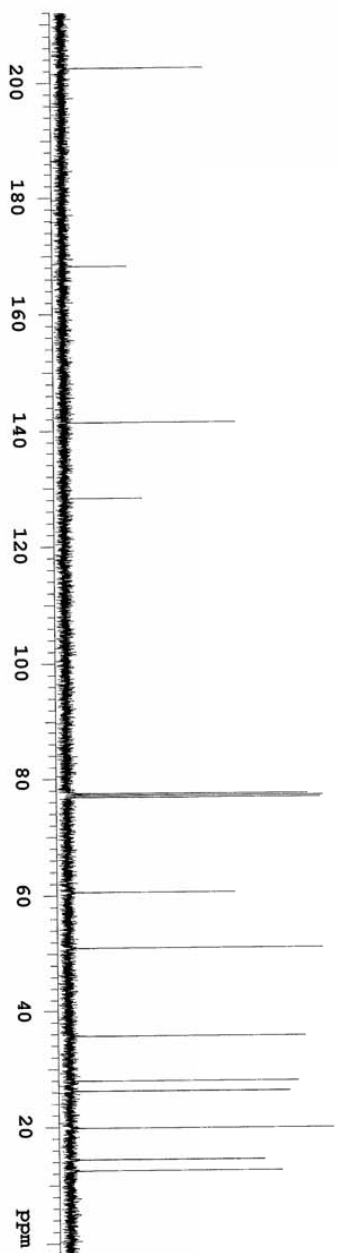

TN3-127B1-1H

Sample Name:

FM-IX-115

Data Collected on:

nmr13-vmmr3400

Archive directory:

Sample directory:

FIDFile: PROTON

Pulse Sequence: PROTON (szpuls)

Solvent: cdcl3

Data collected on: wed 16 2013

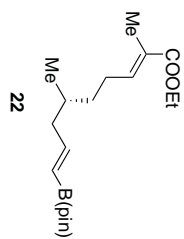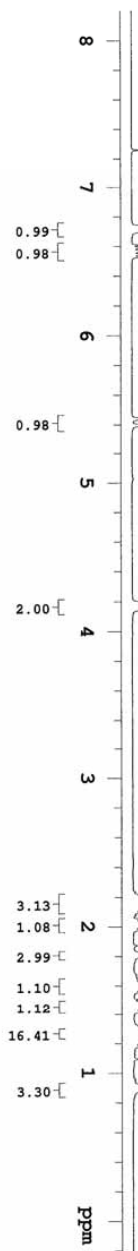

TM3-12781-1H  
Sample Name:  
FM-IX-115  
Data Collected on:  
mm13-rmm5400  
Archive directory:  
Sample directory:  
FIDFile: CARBON  
Pulse Sequence: CARBON (s2pu1)  
Solvent: cdcl3  
Data collected on: Dec 18 2015

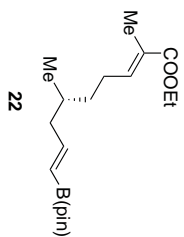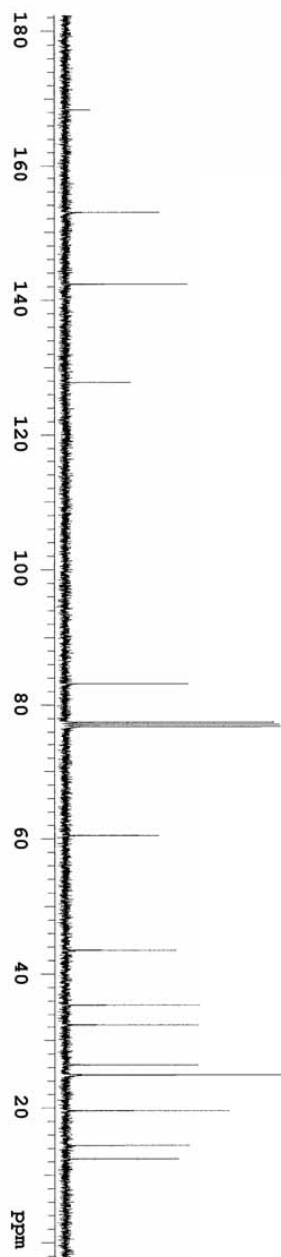

1KX-IV-124B-c  
12/23/15

Sample Name:  
EM-IX-117  
Data Collected on:  
nmr13-vmr8400  
Archive directory:  
Sample directory:

FIDFile: PROTON

Pulse Sequence: PROTON (szpu1)  
Solvent: cdcl3  
Data collected on: Dec 23 2015

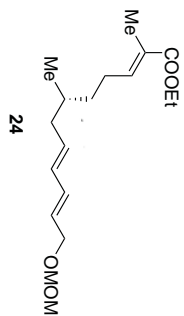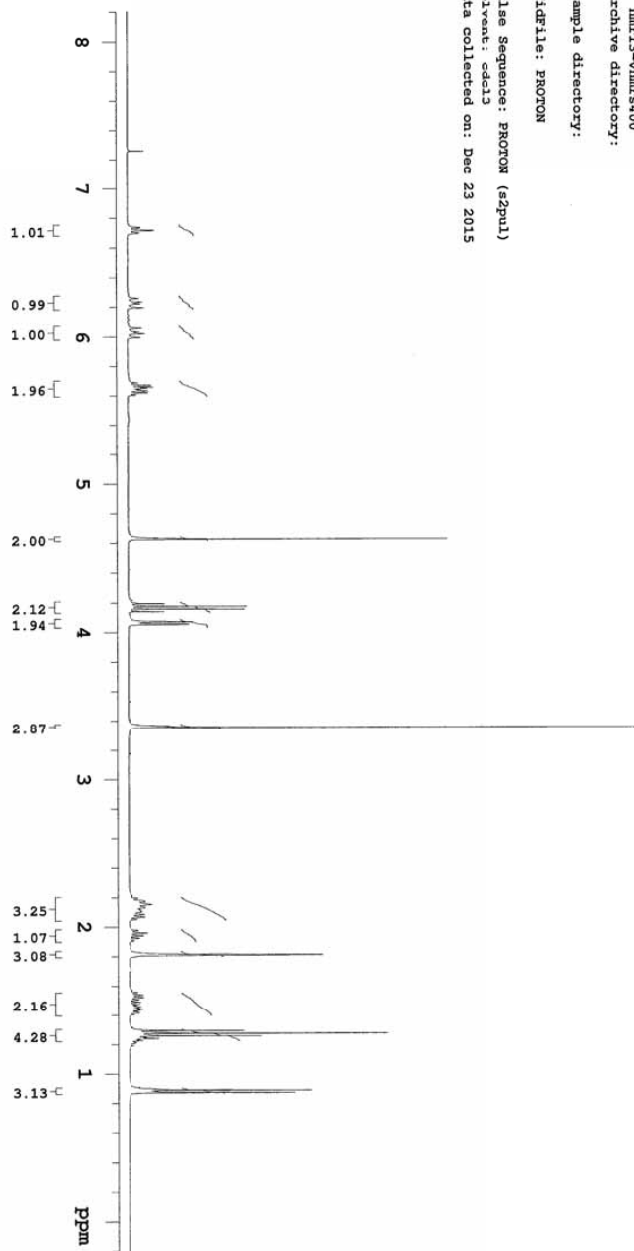



IKK-IV-124B-c  
12/23/15

Sample Name:  
EM-IX-117  
Data Collected on:  
hmc13-vmr2400  
Archive directory:  
Sample directory:

F4File: CARBON

Pulse Sequence: CARBON (s2pul)  
Solvent: cdcl3  
Data collected on: Dec 23 2015

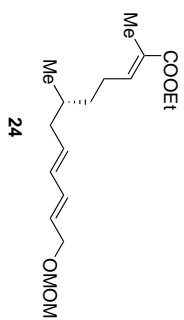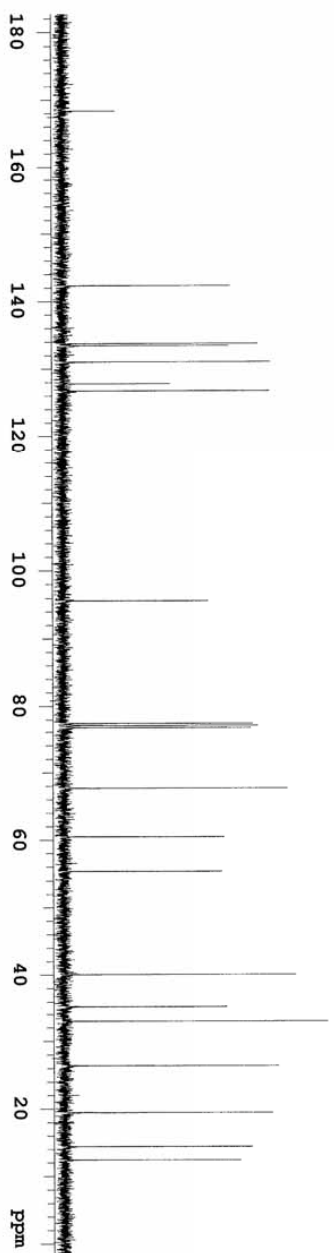

## 4. Density Functional Theory (DFT) Calculations

DFT computations<sup>12</sup> were performed with the Gaussian 09 suite of programs<sup>13</sup>. Geometries were optimized by application of the  $\omega$ B97XD<sup>14</sup> functional. The Def2SVP basis set<sup>15</sup> was used for all atoms and the effect of a polar medium (THF) was modeled by means of an integral equation formalism variant of the polarizable continuum model (IEFPCM)<sup>16</sup>. Stationary points were probed through vibrational analysis and Gibbs free energy corrections were performed under standard conditions (298.15 K, 1.0 atm). Single point energy calculations at the geometries optimized at the  $\omega$ B97XD/Def2SVP<sub>THF(PCM)</sub> level have been performed with a range of density functionals that account for dispersion<sup>17</sup> and the larger Def2TZVPP<sup>15</sup> basis set using the SMD solvation model<sup>18</sup> in THF. Since the correct density functional is not known we tested several state of the art approaches that have been developed over the past decade<sup>12</sup>:  $\omega$ B97XD<sup>14</sup> and M06<sup>19</sup>, MN12SX<sup>20</sup>, MN12L<sup>20</sup>, M06L<sup>19</sup>, BP86-D3BJ<sup>21,12b</sup> and PBE0-D3BJ<sup>22,12b</sup>). Gibbs free energies are provided in Section 5 and a file for convenient

---

(12) For reviews on the application of DFT calculations to transition metal chemistry, see: (a) Cramer, C. J. & Truhlar, D. G. *Phys. Chem. Chem. Phys.* **11**, 10757–10816 (2009). (b) Grimme, S., Ehrlich, S. & Goerigk, L. *J. Comp. Chem.* **32**, 1456–1465 (2011). (c) Peverati, R. & Truhlar, D. G. *Phil. Trans. R. Soc. A* **372**:20120476 (2014).

(13) Frisch, M. J.; Trucks, G. W.; Schlegel, H. B.; Scuseria, G. E.; Robb, M. A.; Cheeseman, J. R.; Scalmani, G.; Barone, V.; Mennucci, B.; Petersson, G. A.; Nakatsuji, H.; Caricato, M.; Li, X.; Hratchian, H. P.; Izmaylov, A. F.; Bloino, J.; Zheng, G.; Sonnenberg, J. L.; Hada, M.; Ehara, M.; Toyota, K.; Fukuda, R.; Hasegawa, J.; Ishida, M.; Nakajima, T.; Honda, Y.; Kitao, O.; Nakai, H.; Vreven, T.; Montgomery, Jr., J. A.; Peralta, J. E.; Ogliaro, F.; Bearpark, M.; Heyd, J. J.; Brothers, E.; Kudin, K. N.; Staroverov, V. N.; Kobayashi, R.; Normand, J.; Raghavachari, K.; Rendell, A.; Burant, J. C.; Iyengar, S. S.; Tomasi, J.; Cossi, M.; Rega, N.; Millam, J. M.; Klene, M.; Knox, J. E.; Cross, J. B.; Bakken, V.; Adamo, C.; Jaramillo, J.; Gomperts, R.; Stratmann, R. E.; Yazyev, O.; Austin, A. J.; Cammi, R.; Pomelli, C.; Ochterski, J. W.; Martin, R. L.; Morokuma, K.; Zakrzewski, V. G.; Voth, G. A.; Salvador, P.; Dannenberg, J. J.; Dapprich, S.; Daniels, A. D.; Farkas, Ö.; Foresman, J. B.; Ortiz, J. V.; Cioslowski, J.; Fox, D. J. *Gaussian 09, Revision D.01*, Gaussian, Inc., Wallingford CT, **2009**.

(14) Chai, J.-D. & Head-Gordon, M. *Phys. Chem. Chem. Phys.*, **10**, 6615–6620 (2008).

(15) Weigend, F. & Ahlrichs, R. *Phys. Chem. Chem. Phys.* **7**, 3297–3305 (2005).

(16) Scalmani, G. & Frisch, M. J. *J. Chem. Phys.* **132**, 114110 (2010).

(17) For selected examples highlighting the importance of including treatment of dispersion interactions in modeling olefin metathesis reactions promoted by Ru carbene complexes, see: (a) Torker, S., Merki, D. & Chen, P. *J. Am. Chem. Soc.* **130**, 4808–4814 (2008). (b) Minenkov, Y., Occhipinti, G., Singstad, A. & Jensen, V. R. *Dalton Trans.* **41**, 5526–5541 (2012). (c) Minenkov, Y., Occhipinti, G. & Jensen, V. R. *Organometallics* **32**, 2099–2111 (2013). (d) Khan, R. K. M., Torker, S. & Hoveyda, A. H. *J. Am. Chem. Soc.* **136**, 14337–14340 (2014).

(18) Marenich, A. V., Cramer, C. J. & Truhlar, D. G. *J. Phys. Chem. B* **113**, 6378–6396 (2009).

(19) Zhao, Y., & Truhlar, D. G. *Acc. Chem. Res.* **41**, 157–167 (2008).

(20) Peverati, R., Truhlar, D. G. *Phys. Chem. Chem. Phys.* **14**, 16187–16191 (2012).

(21) (a) Becke, A. D. *Phys. Rev. A: At., Mol., Opt. Phys.* **38**, 3098–3100 (1988). (b) Perdew, J. P. & Yue, W. *Phys. Rev. B* **33**, 8800–8802 (1986).

(22) Adamo, C. & Barone, V. *J. Chem. Phys.* **110**, 6158–6169 (1999).

viewing of computed geometries with the program Mercury 3.3 is appended as separate “coordinates.xyz” file in Section 6<sup>23</sup>.

## Nomenclature

We have adopted the following nomenclature to label the structures investigated through DFT calculations:

- i.** **PA** and **AA** denote propargyl and allyl addition, respectively.
- ii.** For ground state complexes we use the sequence **ligand–Cu–nucleophile**. For example, **9d–Cu–allenyl** specifies a linear Cu complex involving ligand **9d** bound to an allenyl group.
- iii.** For complexes that contain a bound dienophile, we use the sequence **reaction type–ligand<sub>bridge</sub>–structure<sub>regioselectivity</sub>**. For example, **PA–9d<sub>Na</sub>–ts<sub>1,6major</sub>** denotes the transition state for 1,6-addition of a propargyl group leading to the major enantiomer promoted by a Cu complex that is derived from imidazolium salt **9d** with a sodium bridge toward the substrate carbonyl groups.
- iv.** The terms **ed** (educt) and **prod** (product), denote ground states on either side of the transition state **ts**, which have been obtained through intrinsic reaction coordinate (IRC) calculations through the use of the L(ocal) Q(uadratic) A(approximation) method and subsequent optimization.<sup>24</sup> Unlike the transition state structures **ts**, for which extensive screening of the conformational space has been performed (Figures S15-1 to S15-9), the reported structures for **ed** and **prod** might not represent the lowest energy conformers. In cases where the educt (**ed**) is a  $\pi$ -complex wherein the double bond between the  $\alpha$  and  $\beta$  carbon atoms of the substrate is bound to Cu, the term **pc** ( $\pi$ -complex) is used instead.

## Investigation of different chelate geometries (Fig. S1-1)

*Precise* determination of the reaction barriers through DFT computations (cf. Fig. S1-1) is non-trivial. In particular, the exact ground state of the reaction mixture likely consists of a complex mixture of interconverting species involving the Na alkoxide, the dienophile substrate, the Cu salt and the free alcohol. Modeling of an enantioselective process, which reduces the number of possible reaction pathways by a factor of two, allows for formulation of a plausible stereochemical model as well as elucidation of the role of the catalyst’s hydroxy group.

As a strong base, NaOt-Bu can deprotonate the alcohol within a complex such as **9d–Cu–allenyl** and easily establish a Na bridge with the substrate’s carbonyl groups (**PA–9d<sub>Na</sub>–ts<sub>1,6major</sub>**) with a barrier of only 0.7 kcal/mol at the  $\omega$ B97XD/Def2TZVPP<sub>THF(SMD)}/\omegaB97XD/Def2SVP<sub>THF(PCM)</sub> level (Figure S1-1a). With the less basic NaOPh the barrier to hydroxyl deprotonation is significantly higher for **PA–9d<sub>Na</sub>–ts<sub>1,6major</sub>** (16.0 kcal/mol; see Fig. S1-1b). However, NaOPh, can still establish a bridge giving rise to **PA–9d<sub>NaOPh</sub>–ts<sub>1,6major</sub>** with a readily accessible barrier of 2.8 kcal/mol relative the ground</sub>

(23) Lichtenberger, D. L. & Gladysz, J. A. *Organometallics* **33**, 835–835 (2014). The “coordinates.xyz” file can be generated by copying all the coordinates in Section 6 into a text file without empty lines and changing the extension to “.xyz”.

(24) (a) Page, M., McIver Jr., J. W. *J. Chem. Phys.* **88**, 922–935 (1988). (b) Page, M., Doubleday Jr., C. & McIver Jr., J. W. *J. Chem. Phys.* **93**, 5634–5642 (1990).

state **9d**–Cu–allenyl (see Fig. S1-1c). In the absence of a base formation of the aforementioned Na-based complex and conjugate addition seems to be unlikely (H-bonding transition state **PA**–**9d**–**ts**<sub>1,6major</sub> with a barrier of 20.8 kcal/mol; see Fig. S1-1d).

Furthermore, we investigated the possibility of involvement of a sodium-borate bridge involving the alcohol on the NHC ligand (see Fig. S1-1e). Depending on the ground state [phenoxyBpin (**PhOBpin**) + NaOPh (*ground state II*) or the derived borate complex (**PhO**)<sub>2</sub>**Bpin**–Na<sup>+</sup> formed from the former two components (*ground state I*)], the barrier to the transition state (**PA**–**9d**<sub>Na-borate</sub>–**ts**<sub>1,6major</sub>) may vary. If a borate-containing ground state were to be involved (*ground state I*), the barrier to the transition state (1.6 kcal/mol) would be close to that obtained in Fig. S1-1c with a NaOPh bridge (2.8 kcal/mol). Although such a possibility cannot be ruled out on the basis of DFT calculations, we chose to focus on the simpler system with the NaOPh bridge in the studies detailed below.

### Stereochemical model with a NaOPh bridge (Fig. S2-1 and S3-1)

The pathways leading to major and minor enantiomers for 1,6-addition of a propargyl or a (pin)B–substituted allyl group with ligands derived from **9b** and **9d** involving a bridge through an additional NaOPh molecule are shown in Fig. S2-1 and S3-1 (cf. Fig. 4 in the manuscript). Single point energy calculations with various density functionals (Fig. S2-2 and S3-2) reveal similar trends regarding the energy differences between the pathways that lead to major and minor enantiomers. Nonetheless, there are significant distinctions. For example, ωB97XD, M06, MN12SX, which are ranked among the most accurate approaches in a recent comparison of density functionals<sup>12c</sup>, predict **AA**–**9d**<sub>NaOPh</sub>–**ts**<sub>1,6major</sub> for allyl addition (AA) in a close range between 4.6 and 7.7 kcal/mol (Fig. S3-2), whereas MN12L, M06L and PBE0-D3BJ estimate **AA**–**9d**<sub>NaOPh</sub>–**ts**<sub>1,6major</sub> at a lower energy relative to the ground state **9d**<sub>NaOPh</sub>–Cu–allyl (–5.1, –1.4 and –1.9 kcal/mol, respectively). With BP86-D3BJ the energy of **AA**–**9d**<sub>NaOPh</sub>–**ts**<sub>1,6major</sub> is lower still (–11.5 kcal/mol). Similar trends were observed with propargyl additions (Fig. S2-2).

### Stereochemical model involving deprotonation with NaOt-Bu and a Na bridge (Fig. S4-1 & S5-1)

We have investigated the energy differences between the pathways leading to the major and minor enantiomers for 1,6-addition of a propargyl or a (pin)B-substituted allyl group with ligands derived from **9b** and **9d** after hydroxyl deprotonation (Na bridge); the results of this segment of our studies are illustrated in Fig. S4-1 and S5-1. For propargyl additions, the minor pathways **PA**–**9d**<sub>Na</sub>–**ts**<sub>1,6minor</sub> and **PA**–**9b**<sub>Na</sub>–**ts**<sub>1,6minor</sub> are destabilized by 1.3 and 6.4 kcal/mol, respectively (Fig. S4-1; compared to 1.1 and 4.4 kcal/mol with a NaOPh bridge in Fig. S2-1). In the case of allyl additions, the corresponding energy differences are 3.5 and 1.7 kcal/mol, respectively (Fig. S5-1; vs. 2.4 and 0.4 kcal/mol with a NaOPh bridge in Fig. S3-1). Although the overall trends are similar there are minor differences in the magnitude of the energy values, which may either be ascribed to the alterations in the size of the bridging unit (a NaOPh bridge might provide a longer arm to establish coordination to the carbonyl groups on the substrate) or arise from the error bar in computational studies. The likelihood for the different salt bridges has been discussed in the text associated with Fig. S1-1.

### Influence of the base on the background reaction (Fig. S6-1)

As was already noted (see discussion related to Fig. S1-1), determination of the precise energy barrier for the background reaction is non-trivial; this is because the exact ground state energy of the reaction mixture is unknown (Fig. S6-1). At the  $\omega$ B97XD/Def2TZVPP<sub>thf(SMD)</sub>// $\omega$ B97XD/Def2SVP<sub>thf(PCM)</sub> level of theory the ground state with a model NHC ligand ( $\text{Me}_2\text{C}_3\text{H}_4\text{N}_2$ , **Me<sub>2</sub>NHC–Cu–allenyl**) is 7.6 kcal/mol lower than the corresponding ground state with a  $\text{PMe}_3$  ligand (**PMe<sub>3</sub>–Cu–allenyl**). Without an NHC or a phosphine ligand the ground state energy is increased to 15.7 kcal/mol (**THF–Cu–allenyl**). These values are congruent with the well-established attribute of NHC ligands regarding their higher bond dissociation energies (BDEs) than phosphine ligands<sup>25</sup>. In agreement with the experimental data, it is improbable that either NaOt-Bu or NaOPh are capable of replacing the NHC ligand from the coordination sphere of Cu (16.5 and 27.2 kcal/mol, respectively for the 1,6-propargyl addition transition states **PA–NaOPh–ts<sub>1,6</sub>** and **PA–NaOt-Bu–ts<sub>1,6</sub>** relative to ground state **Me<sub>2</sub>NHC–Cu–allenyl**). In the case of  $\text{PMe}_3$ , these barriers are reduced to 8.9 and 19.6 kcal/mol relative to ground state **PMe<sub>3</sub>–Cu–allenyl**. The control experiments shown in Scheme S4 (page S42) suggest that NaOt-Bu is better able to perform the background reaction in absence of a ligand. Nonetheless, corresponding experiments in the presence of SIMes (Fig. 1b) or  $\text{PPh}_3/\text{PCy}_3$  (Scheme S4, page S42) rule out phosphine ligand lability as the sole reason for background reactivity since the observation of 1,4-propargyl addition products can clearly be attributed to the presence of a phosphine ligand. Furthermore, the low computed regioselectivity for the background reaction in Fig. S6-1, i.e. the transition states for 1,6-propargyl addition **PA–NaOt-Bu–ts<sub>1,6</sub>** (8.9 kcal/mol) and 1,4-propargyl addition **PA–NaOt-Bu–ts<sub>1,4</sub>** (7.4 kcal/mol) are similar in magnitude, likely suggests alternative pathways to be operative or it may be attributed to a more complex environment for the ionic salt bridge.

### Analysis of the origin of diastereoselectivity for allyl addition with a model NHC ligand (Fig. S7-1)

The calculations shown in Fig. S7-1 performed with a model NHC ligand (**Me<sub>2</sub>NHC**,  $\text{Me}_2\text{C}_3\text{H}_4\text{N}_2$ ) without a sodium salt reveal that the minor diastereomer is generated through a boat-like transition state **AA–Me<sub>2</sub>NHC–ts<sub>1,6minor</sub>**; such a complex suffers from additional steric repulsion between the substrate phenyl ring and the pinacolatoboron group. These destabilizing interactions are absent in the transition state leading to the major diastereomer **AA–Me<sub>2</sub>NHC–ts<sub>1,6major</sub>** with energies relative to the ground state **Me<sub>2</sub>NHC–Cu–allyl** of 20.1 and 14.2 kcal/mol, respectively ( $\omega$ B97XD/Def2TZVPP<sub>thf(SMD)</sub>// $\omega$ B97XD/Def2SVP<sub>thf(PCM)</sub> level of theory). The calculated preferred sense of diastereoselectivity is consistent with experimental data and, consequently, the minor diastereomer has not been considered in modeling studies with the chiral ligands. Comparable trends have been calculated with the other investigated density functionals (Fig. S7-2).

(25) For example, see: Dorta, R., Stevens, E. D., Scott, N. M., Costabile, C., Cavallo, L., Hoff, C. D. & Nolan, S. P. *J. Am. Chem. Soc.* **127**, 2485–2495 (2005).

### Difference in selectivity with NHC and phosphine ligands – Part I (Fig. S8-1, S9-1, S10-1 & S11-1)

To probe the origin of the difference between NHC and phosphine ligands during 1,6-propargyl addition to a **dienoate** substrate, we investigated the following three competitive pathways: **i**) 1,6-addition (denoted **ts<sub>1,6</sub>**); **ii**) 1,4-allenyl addition (denoted **ts<sub>1,4AA</sub>**); **iii**) 1,4-propargyl addition (denoted **ts<sub>1,4</sub>**). Comparison of Cu complexes bearing an NHC ligand (SIMes) and a phosphine ligand (PPh<sub>3</sub>) is illustrated in Fig. S8-1. Although there are minor differences between the complexes, with both ligand systems 1,6-propargyl addition (24.4 and 26.0 kcal/mol for **PA-SIMes-ts<sub>1,6</sub>** and **PA-PPh<sub>3</sub>-ts<sub>1,6</sub>**, respectively) is favored to a substantial degree compared to 1,4-propargyl addition (30.9 and 30.4 kcal/mol for **PA-SIMes-ts<sub>1,4</sub>** and **PA-PPh<sub>3</sub>-ts<sub>1,4</sub>**, respectively). Similar trends were observed with smaller model NHC and phosphine ligands in which case steric effects can largely be eliminated (Fig. S9-1). 1,6-Propargyl addition (**PA-Me<sub>2</sub>NHC-ts<sub>1,6</sub>** and **PA-PMe<sub>3</sub>-ts<sub>1,6</sub>**) is favored by 6.9 and 5.8 kcal/mol over 1,4-propargyl addition (**PA-Me<sub>2</sub>NHC-ts<sub>1,4</sub>** and **PA-PMe<sub>3</sub>-ts<sub>1,4</sub>**) with Me<sub>2</sub>NHC and PMe<sub>3</sub> as ligands, respectively. Furthermore, selectivity does not change when the substrate is activated through a sodium borate salt (**dienoate-Na-borate**), although the barrier heights are diminished noticeably (Fig. S10-1). The calculated energy barriers for 1,6-propargyl addition are 14.3 and 14.6 kcal/mol for **PA-SIMes<sub>(Na-borate)</sub>-ts<sub>1,6</sub>** and **PA-PPh<sub>3(Na-borate)</sub>-ts<sub>1,6</sub>**, respectively, whereas the magnitude of the barriers for 1,4-propargyl addition (**PA-SIMes<sub>(Na-borate)</sub>-ts<sub>1,4</sub>** and **PA-PPh<sub>3(Na-borate)</sub>-ts<sub>1,4</sub>**) are 22.0 and 21.0 kcal/mol. Additionally, 1,6-propargyl addition through  $\gamma$ -transfer is also favored over 1,4-allenyl addition through  $\alpha$ -transfer of the nucleophile to the  $\beta$ -carbon atom of the electrophile (Figs. S8-1, S9-1 & S10-1). In presence of chiral NHC ligand **9d**, modeled with a sodium bridge, 1,4-allenyl addition **PA-9d<sub>Na</sub>-ts<sub>1,4AA</sub>** is disfavored by 6.8 kcal/mol relative to 1,6-propargyl addition **PA-9d<sub>Na</sub>-ts<sub>1,6</sub>** (Fig. S11-1). It is likely that these trends are the result of the d<sup>10</sup> ligand field on Cu (Fig. S9-3).<sup>26</sup> Natural bond orbital analysis (NBO) indicates that the allenyl nucleophile would have to move across the filled d<sub>x<sup>2</sup>-y<sup>2</sup></sub> orbital on Cu (NBO 103) for  $\alpha$ -addition to occur. This would engender a significant degree of filled-filled interaction with the filled sp<sup>2</sup> hybrid orbital on the nucleophile. Such destabilizing interaction is absent in the transition state for 1,6-propargyl addition.

### Difference in selectivity with NHC and phosphine ligands – Part II (Fig. S12-1, S13-1 & S14-1)

A significant difference between phosphine (PPh<sub>3</sub>) and NHC ligands (SIMes) is linked to their substantially different  $\sigma$ -donating properties. As a result, the HOMO in **SIMes-Cu-allenyl** (-7.14 eV) is about 0.29 eV (corresponds to 6.7 kcal/mol) higher in energy than in **PPh<sub>3</sub>-Cu-allenyl** (-7.43 eV; Fig. S12-1). A more nucleophilic d<sub>z<sup>2</sup></sub> (linear geometry, cf. Fig. 1c) or d<sub>xy</sub> orbital (bent geometry, cf. Figure 1c) on Cu likely facilitates interaction with the  $\pi$ -acidic olefinic substrate. In contrast, a more  $\pi$ -acidic phosphine ligand would make the Cu center more susceptible to hard  $\pi$ -donor ligands (e.g. alkoxides). According to the  $\omega$ B97XD/Def2TZVPP<sub>thf(SMD)</sub>// $\omega$ B97XD/Def2SVP<sub>thf(PCM)</sub> energies shown in

(26) Walroth, R. C., Lukens, J. T., MacMillan, S. N., Finkelstein, K. D. & Lancaster, K. M. *J. Am. Chem. Soc.* **128**, 1922–1931 (2016).

Fig. 12-1, **PPh<sub>3</sub>-Cu-allenyl** binds Na-*Ot*Bu more tightly (-9.2 kcal/mol, red curves) relative to **SIMes-Cu-allenyl** (-5.7 kcal/mol, blue curves). Additionally we find that, in agreement with the experimental data (cf. Fig. 1b), the transition state for 1,6-propargyl addition after  $\pi$ -complex formation with Cu (i.e. **PA-SIMes<sub>NaOtBu</sub>-ts<sub>1,6</sub>**; 17.6 kcal/mol) is significantly favored over the transition state for 1,4-propargyl addition **PA-SIMes<sub>NaOtBu</sub>-ts<sub>1,4</sub>** (26.5 kcal/mol); in the latter Na-*Ot*Bu is coordinated to Cu. Furthermore, this scenario is able to explain the experimentally observed selectivity differences with phosphine ligands (cf. Scheme S4; page S42), wherein the order of computed energies for 1,6-propargyl addition **PA-PPh<sub>3(NaOtBu)</sub>-ts<sub>1,6</sub>** (22.2 kcal/mol) and 1,4-propargyl addition **PA-PPh<sub>3(NaOtBu)</sub>-ts<sub>1,4</sub>** (13.4 kcal/mol) is reversed. Similar trends are observed with sterically modified model systems: In Fig. S13-1, Na-OMe has been used as base instead of Na-*Ot*Bu, whereas model ligands Me<sub>2</sub>NHC and PMe<sub>3</sub> have been used in Fig. S14-1 instead of SIMes and PPh<sub>3</sub>. Assuming that the  $\sigma$ -donor strength of the Lewis basic ligand (NHC or PR<sub>3</sub>) is largely responsible for  $\pi$ -complexation and consequently the regioselectivity of the reaction, it is likely that the anionic and highly nucleophilic (allenyl)<sub>2</sub>-Cu species may be the reason for the high 1,6-selectivity observed for the background reactions.

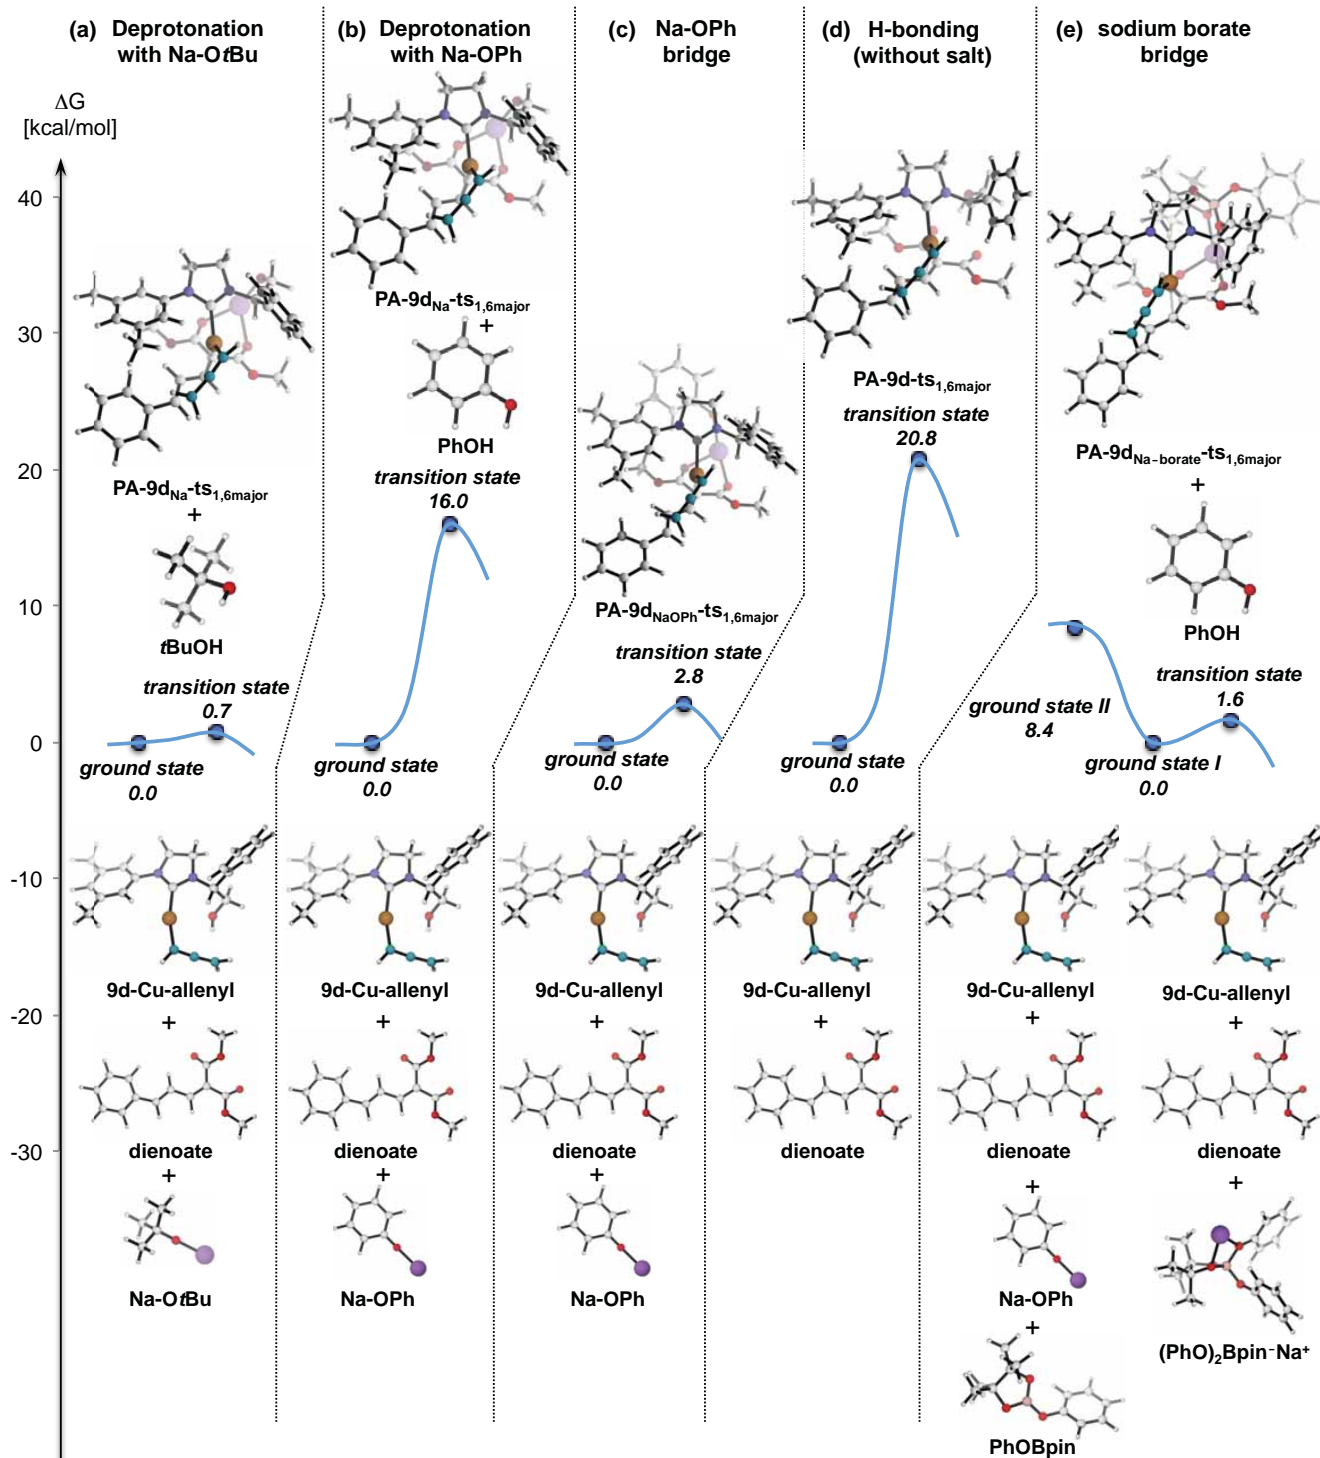

**Figure S1-1.** Free energy surfaces ( $\Delta G$ , kcal/mol) for chelate geometries for the pathway leading to the major enantiomer for 1,6-addition of a propargyl group to a dienoate relative to the allenyl-Cu intermediate bearing the protonated NHC ligand (9d-Cu-allenyl) at the  $\omega$ B97XD/Def2TZVPP<sub>THF(SMD)}/\omegaB97XD/Def2SVP<sub>THF(PCM)</sub> level of theory.</sub>



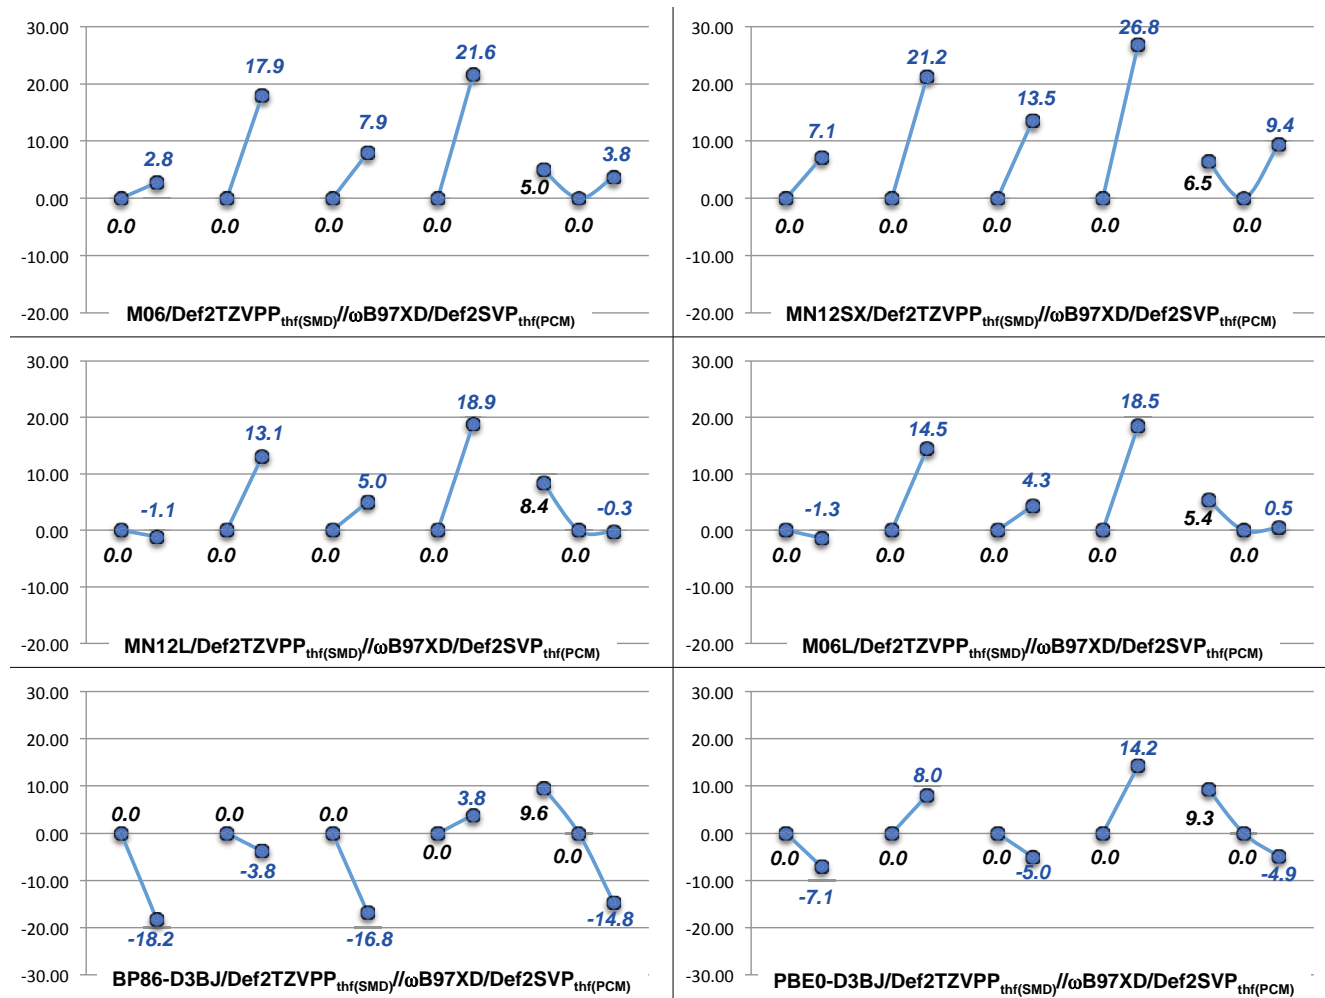

**Figure S1-2.** Free energy surfaces ( $\Delta G$ , kcal/mol) for chelate geometries for the pathway leading to the major enantiomer for 1,6-addition of a propargyl group to a dienolate relative to the allenyl-Cu intermediate bearing the protonated NHC ligand (9d-Cu-allenyl) with various density functionals after geometry optimization with  $\omega$ B97XD/Def2SVP<sub>THF(PCM)</sub>.

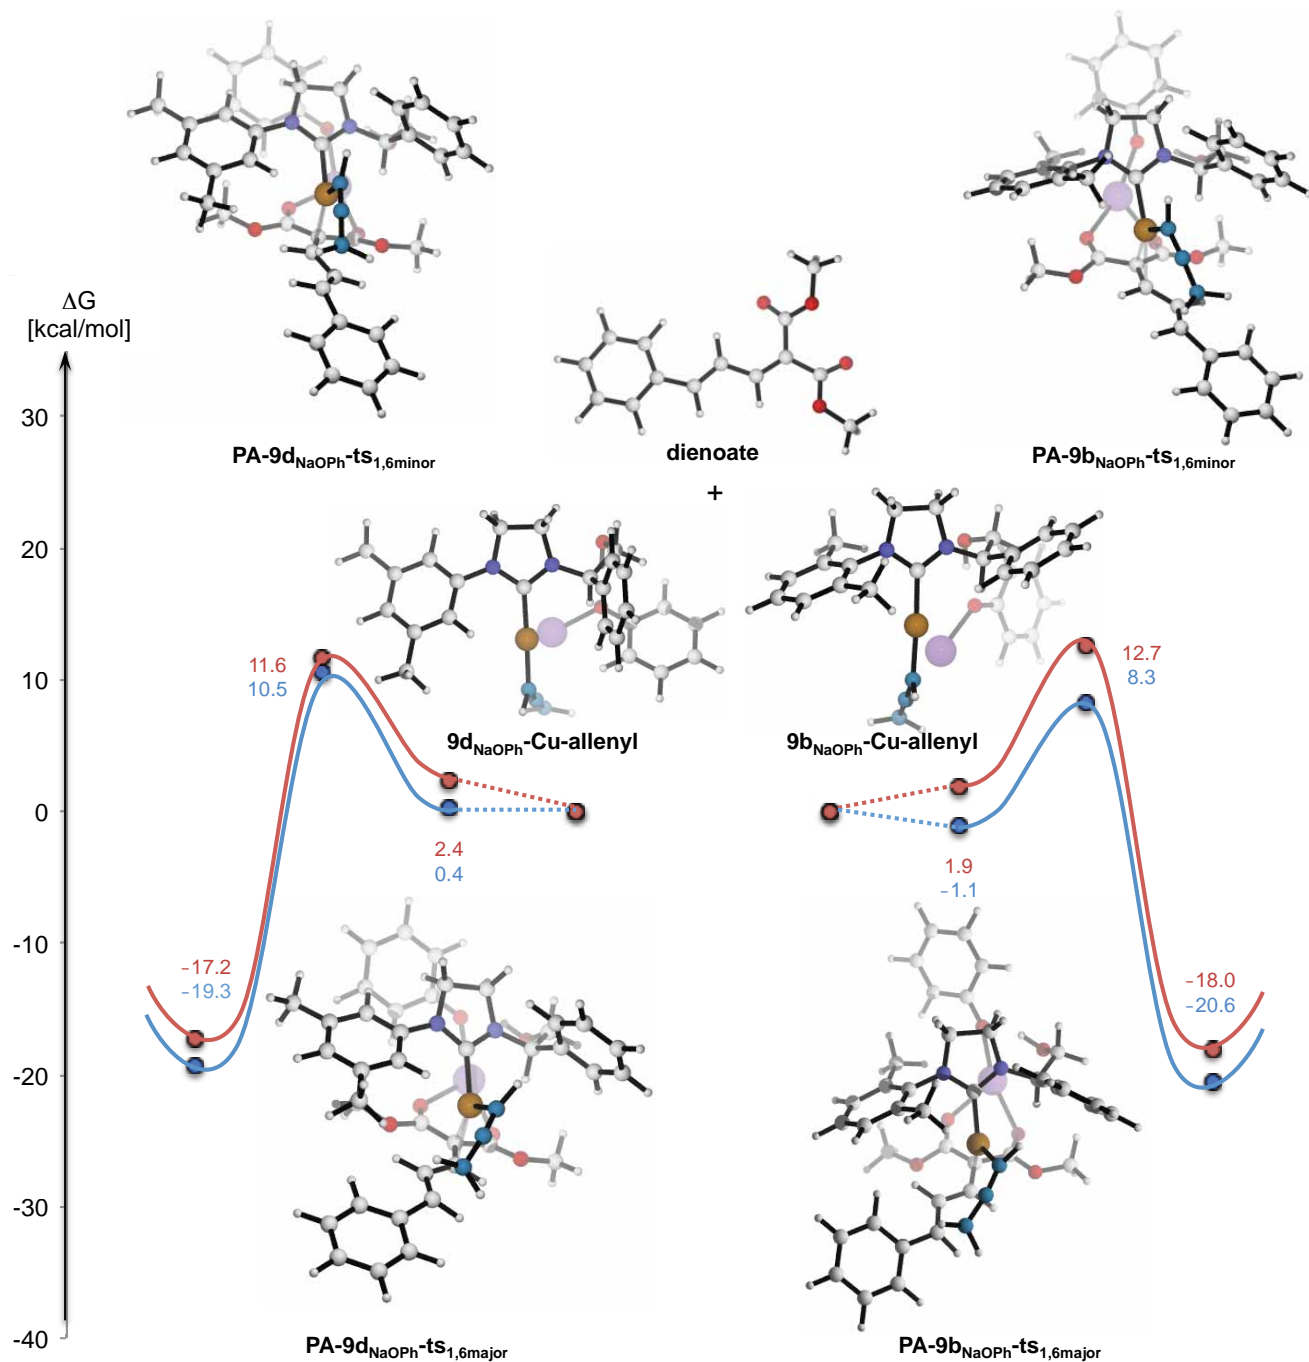

**Figure S2-1.** Free energy surfaces ( $\Delta G$ , kcal/mol) for pathways leading to the major and minor enantiomers for 1,6-addition of a propargyl group to a dienoate with ligands **9d** (left) and **9b** (right) relative to the allenyl–Cu intermediate bearing an additional NaOPh molecule on the NHC ligand at the  $\omega$ B97XD/Def2TZVPP<sub>THF(SMD)</sub>// $\omega$ B97XD/Def2SVP<sub>THF(PCM)</sub> level of theory.

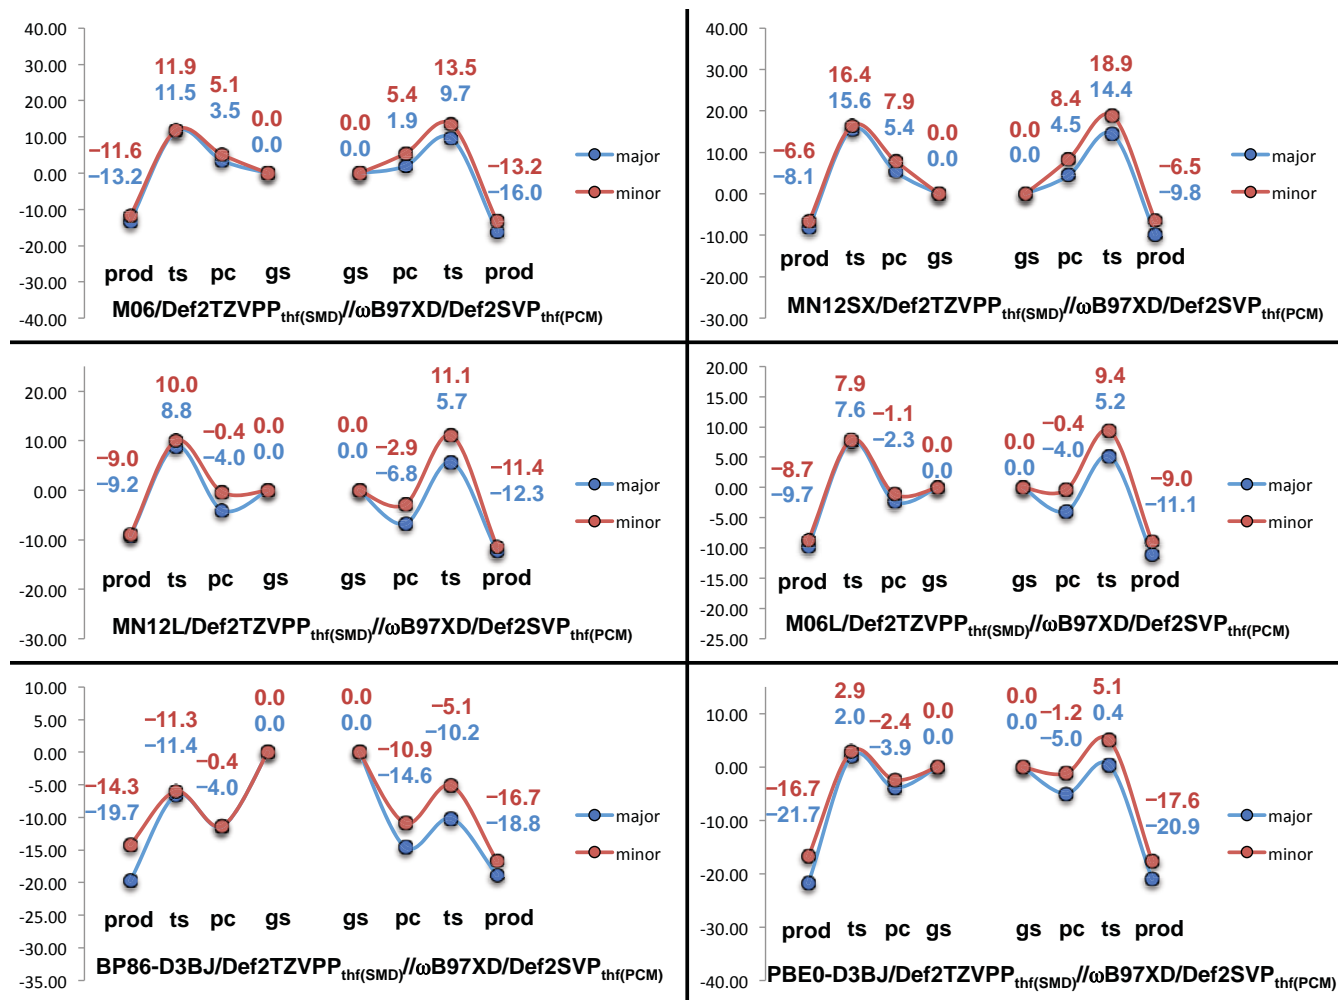

**Figure S2-2.** Free energy surfaces ( $\Delta G$ , kcal/mol) for pathways leading to the major and minor enantiomers for 1,6-addition of a propargyl group to a dienophile with ligands **9d** (left) and **9b** (right) relative to the allenyl-Cu intermediate bearing an additional NaOPh molecule on the NHC ligand with various density functionals after geometry optimization with  $\omega$ B97XD/Def2SVP<sub>THF(PCM)</sub>.

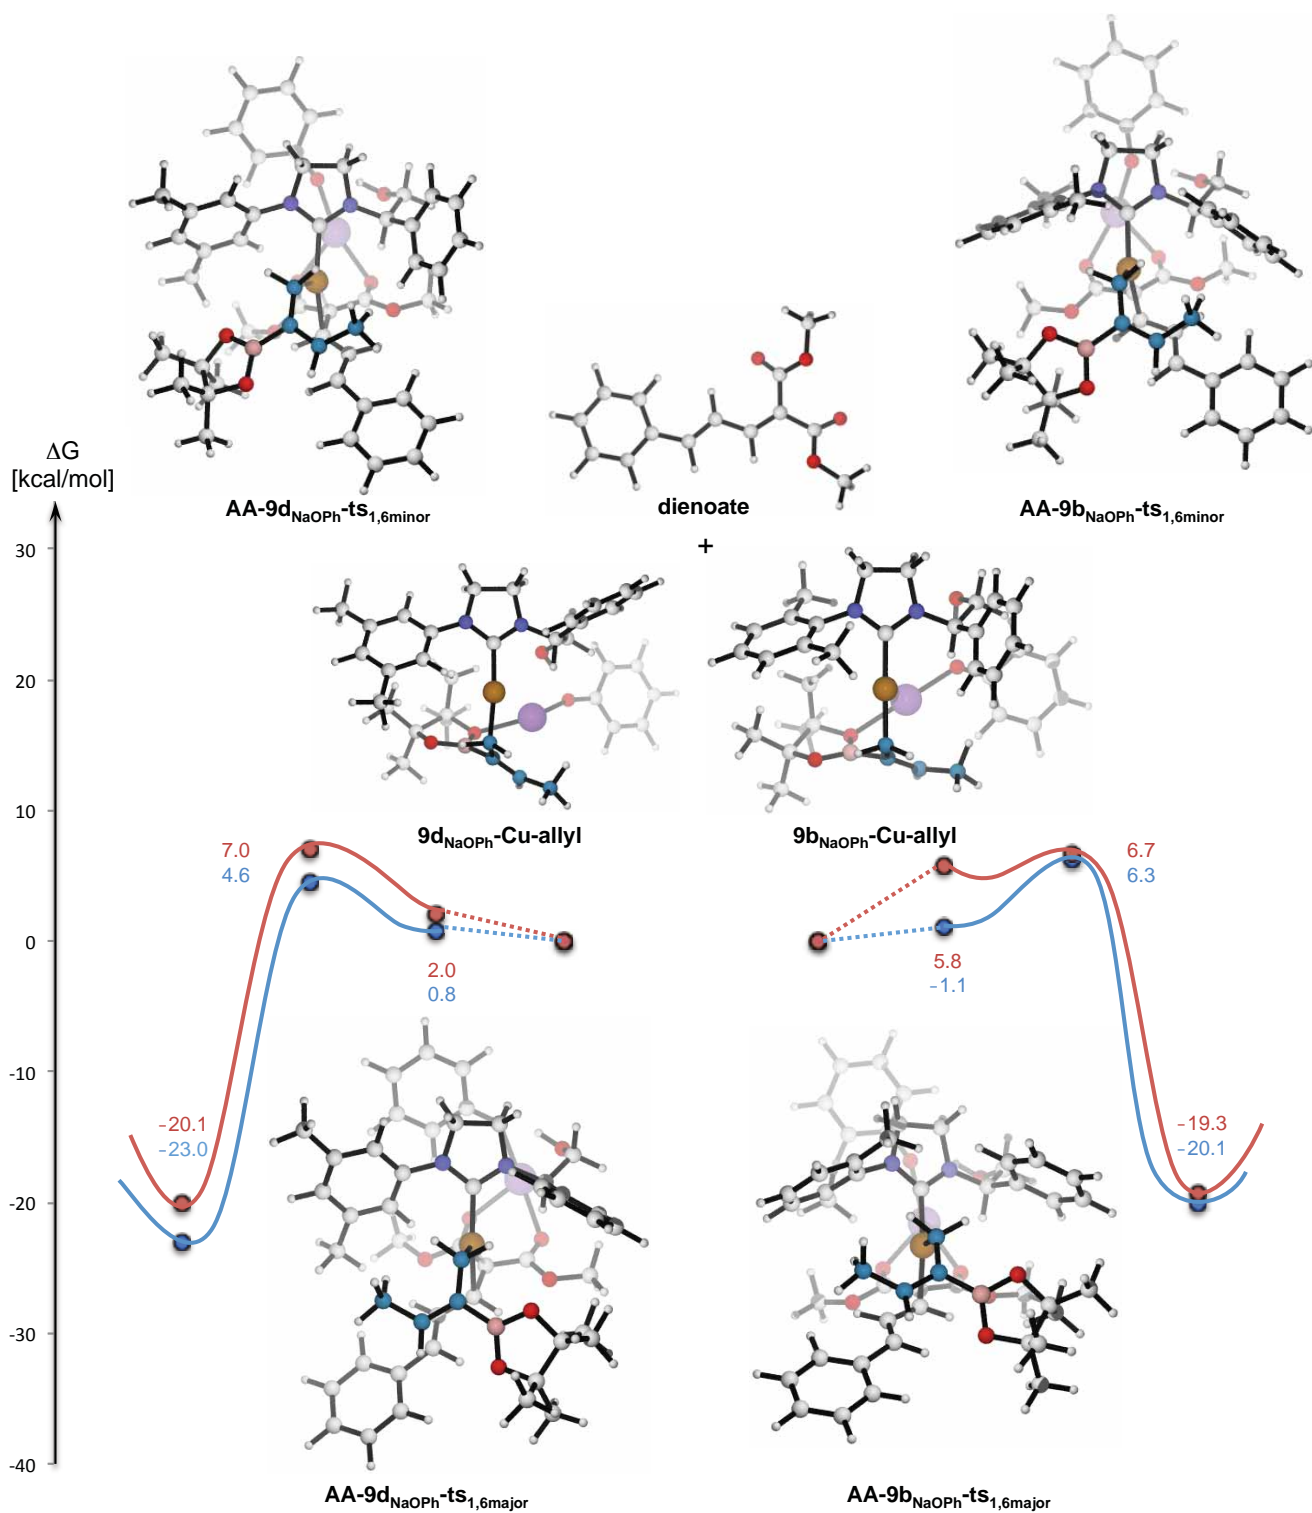

**Figure S3-1.** Free energy surfaces ( $\Delta G$ , kcal/mol) for pathways leading to the major and minor enantiomers for 1,6-addition of a pinacolatoboron substituted allyl group to a dienoate with ligands **9d** (left) and **9b** (right) relative to the allyl-Cu intermediate bearing an additional NaOPh molecule on the NHC ligand at the  $\omega$ B97XD/Def2TZVPP<sub>THF(SMD)</sub>// $\omega$ B97XD/Def2SVP<sub>THF(PCM)</sub> level of theory.

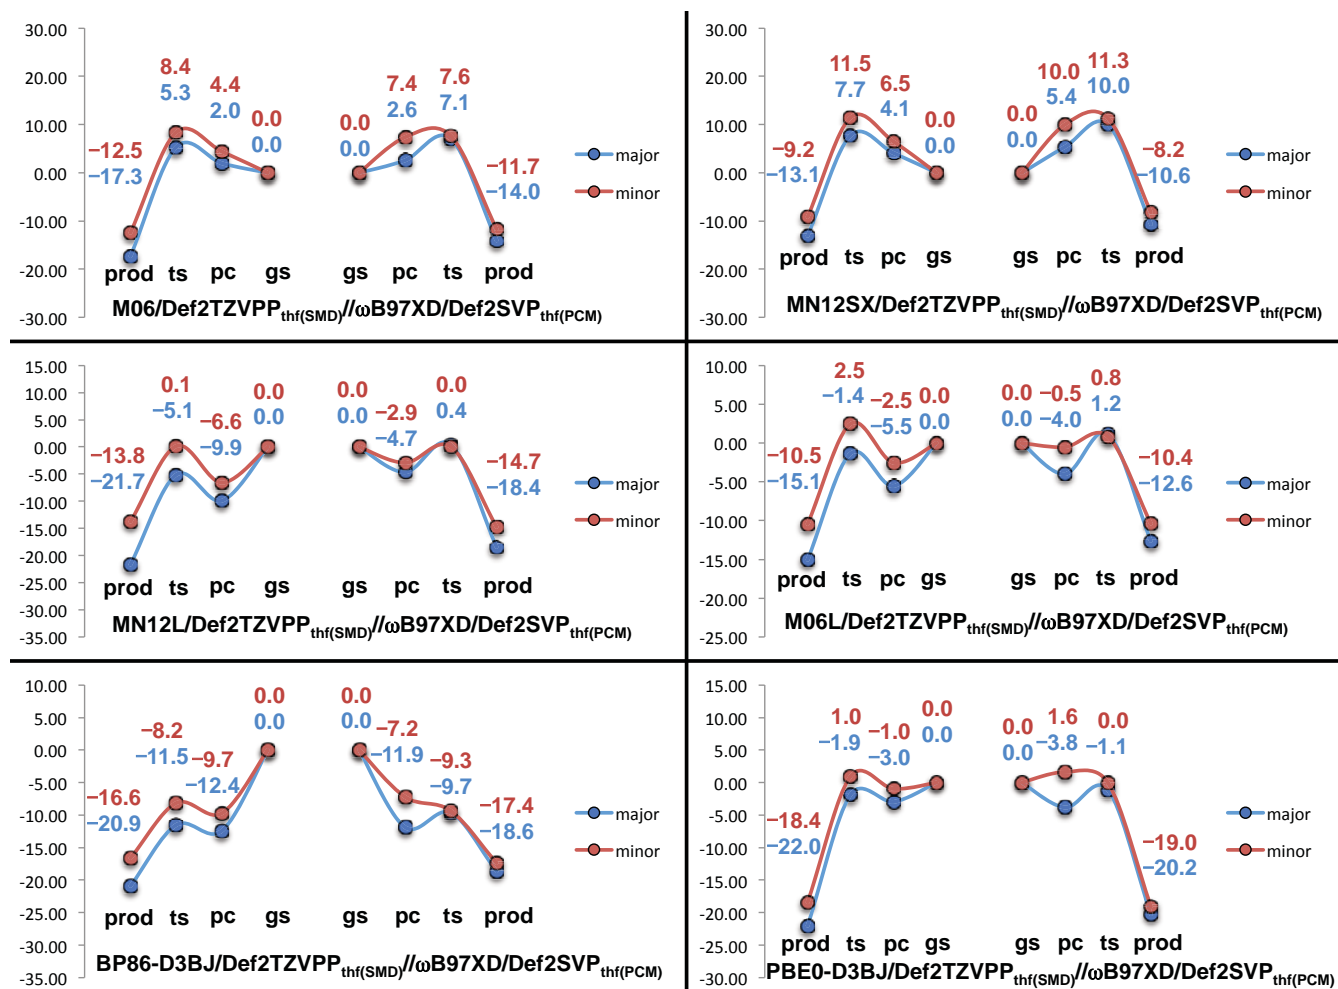

**Figure S3-2.** Free energy surfaces ( $\Delta G$ , kcal/mol) for pathways leading to the major and minor enantiomers for 1,6-addition of a pinacolatoboron substituted allyl group to a dienophile with ligands **9d** (left) and **9b** (right) relative to the allyl-Cu intermediate bearing an additional NaOPh molecule on the NHC ligand with various density functionals after geometry optimization with  $\omega$ B97XD/Def2SVP<sub>THF(PCM)</sub>.

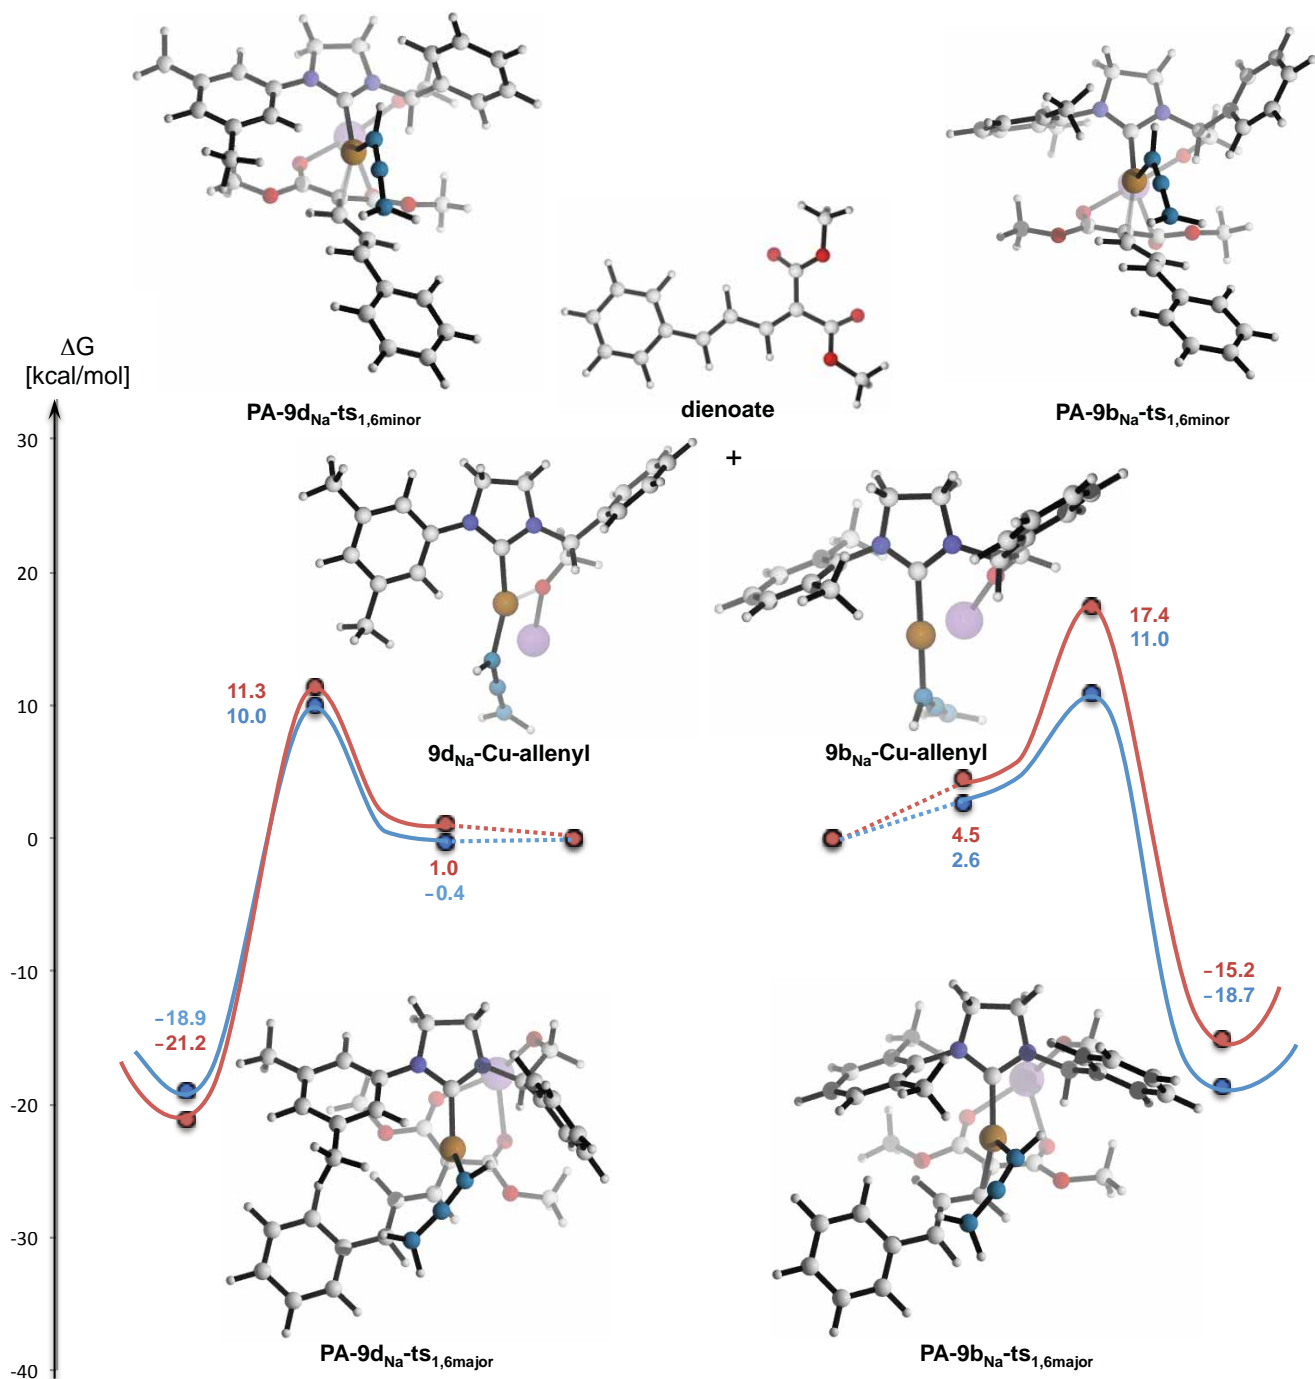

**Figure S4-1.** Free energy surfaces ( $\Delta G$ , kcal/mol) for pathways leading to the major and minor enantiomers for 1,6-addition of a propargyl group to a dienoate with ligands **9d** (left) and **9b** (right) relative to the allenyl-Cu intermediate bearing a deprotonated NHC ligand (Na bridge) at the  $\omega$ B97XD/Def2TZVPP<sub>THF(SMD)</sub>// $\omega$ B97XD/Def2SVP<sub>THF(PCM)</sub> level of theory.

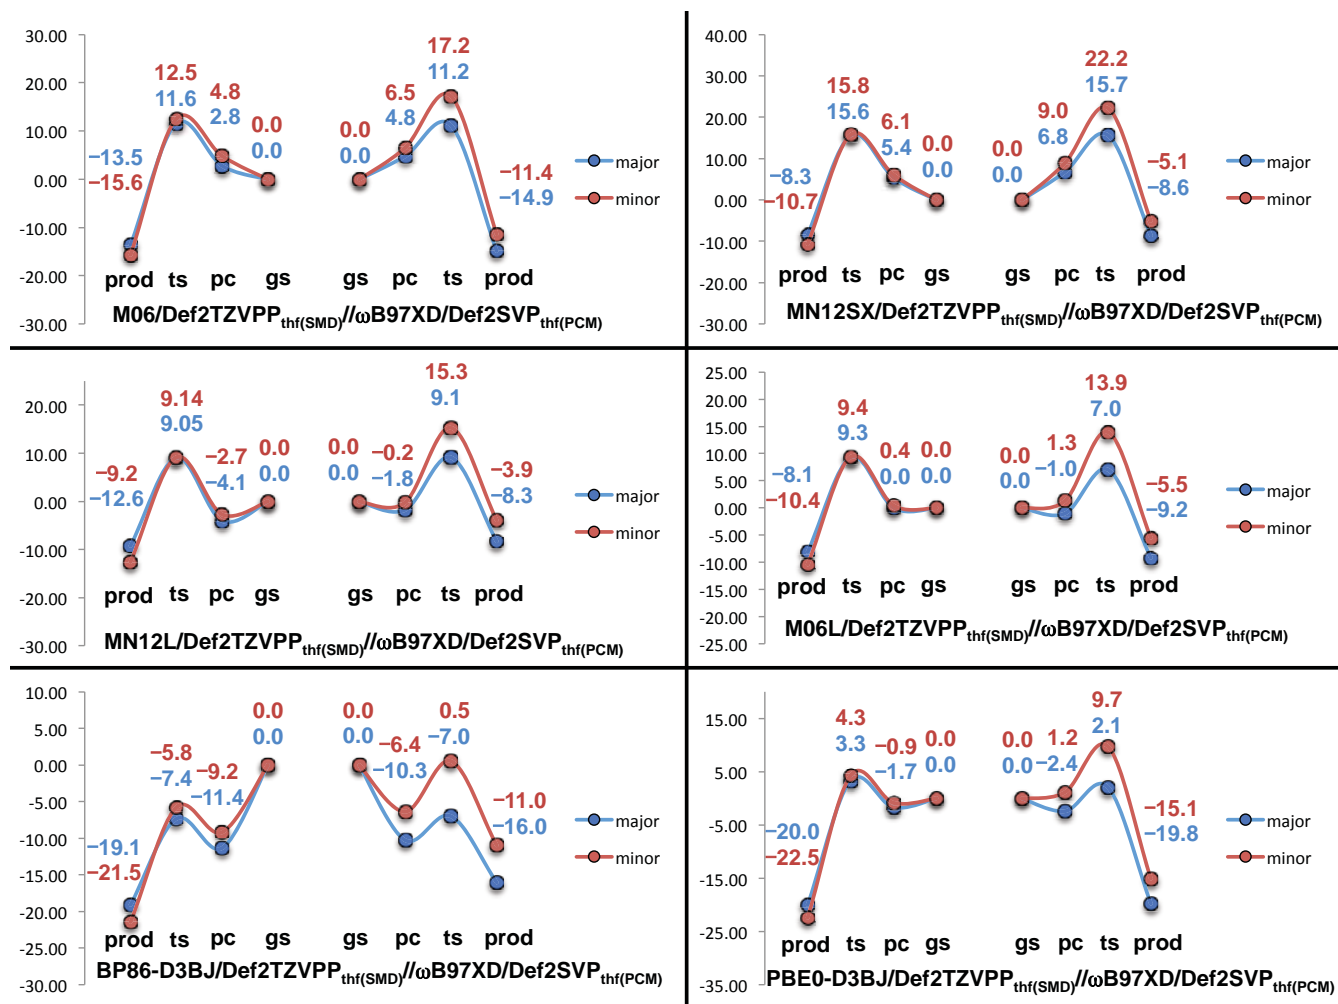

**Figure S4-2.** Free energy surfaces ( $\Delta G$ , kcal/mol) for pathways leading to the major and minor enantiomers for 1,6-addition of a propargyl group to a dienophile with ligands **9d** (left) and **9b** (right) relative to the allenyl-Cu intermediate bearing a deprotonated NHC ligand (Na bridge) with various density functionals after geometry optimization with  $\omega$ B97XD/Def2SVP<sub>THF(PCM)</sub>.

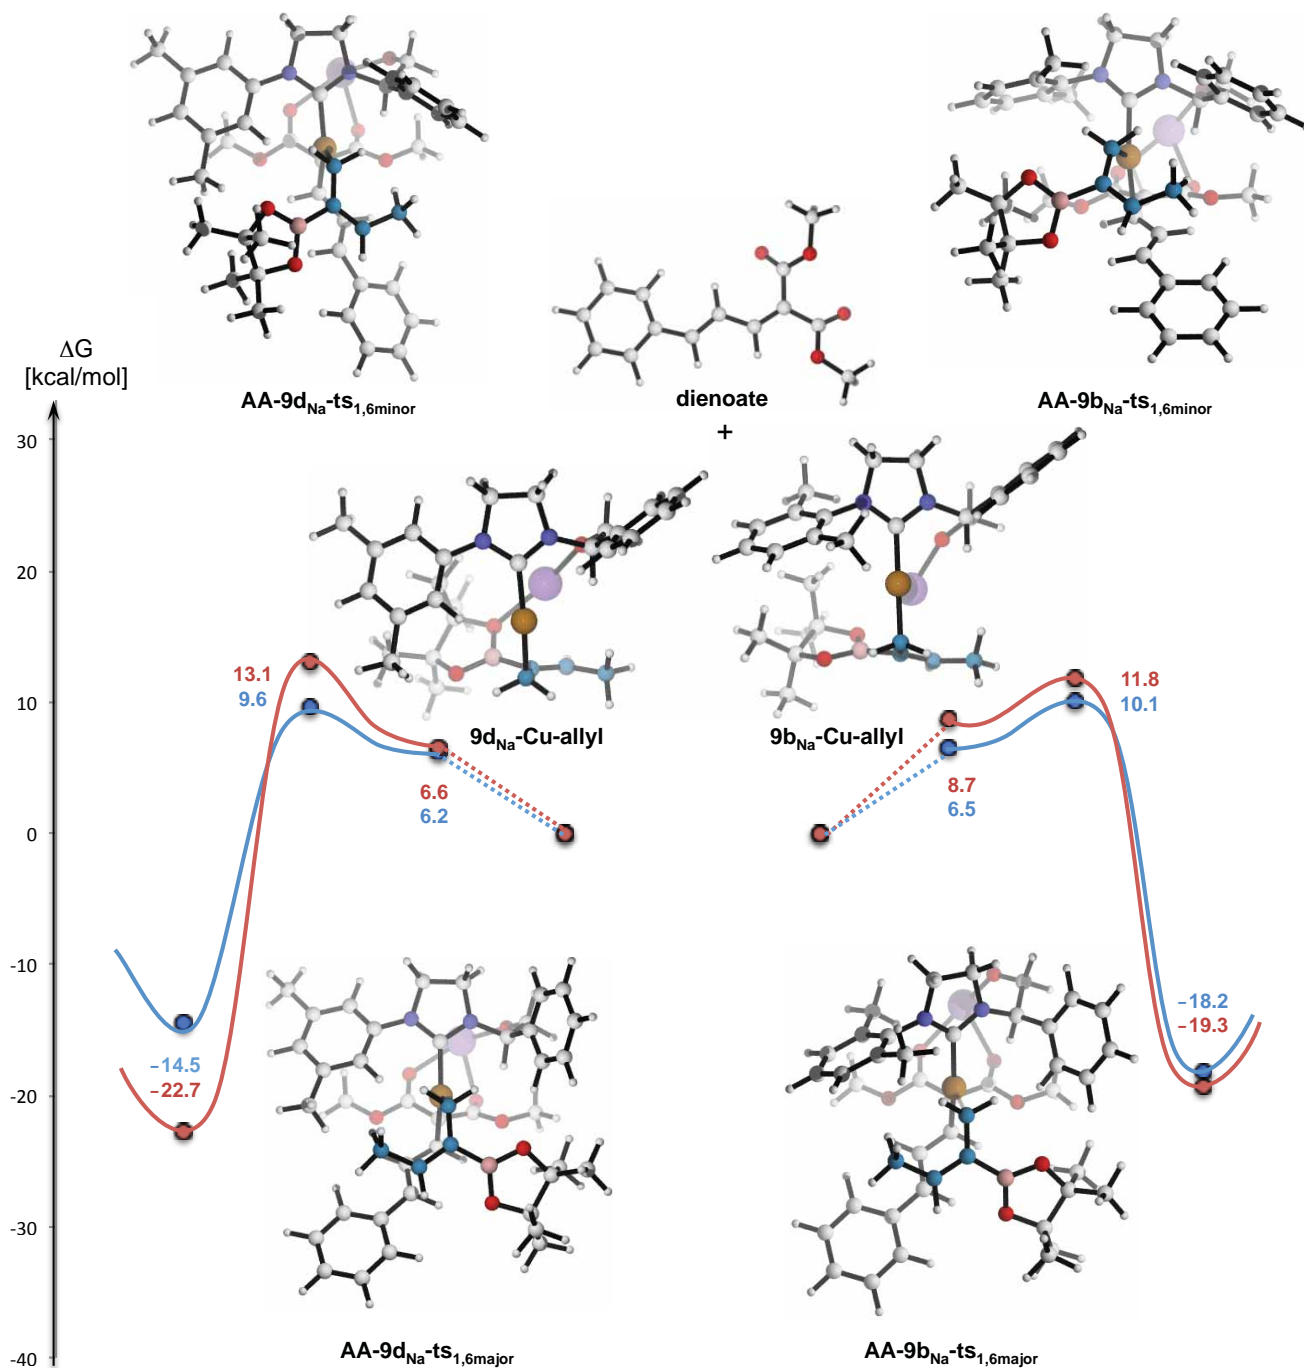

**Figure S5-1.** Free energy surfaces ( $\Delta G$ , kcal/mol) for pathways leading to the major and minor enantiomers for 1,6-addition of a pinacolatoboron substituted allyl group to a dienoate with ligands **9d** (left) and **9b** (right) relative to the allyl-Cu intermediate bearing a deprotonated NHC ligand (Na bridge) at the  $\omega$ B97XD/Def2TZVPP<sub>THF(SMD)</sub>// $\omega$ B97XD/Def2SVP<sub>thf(PCM)</sub> level of theory.



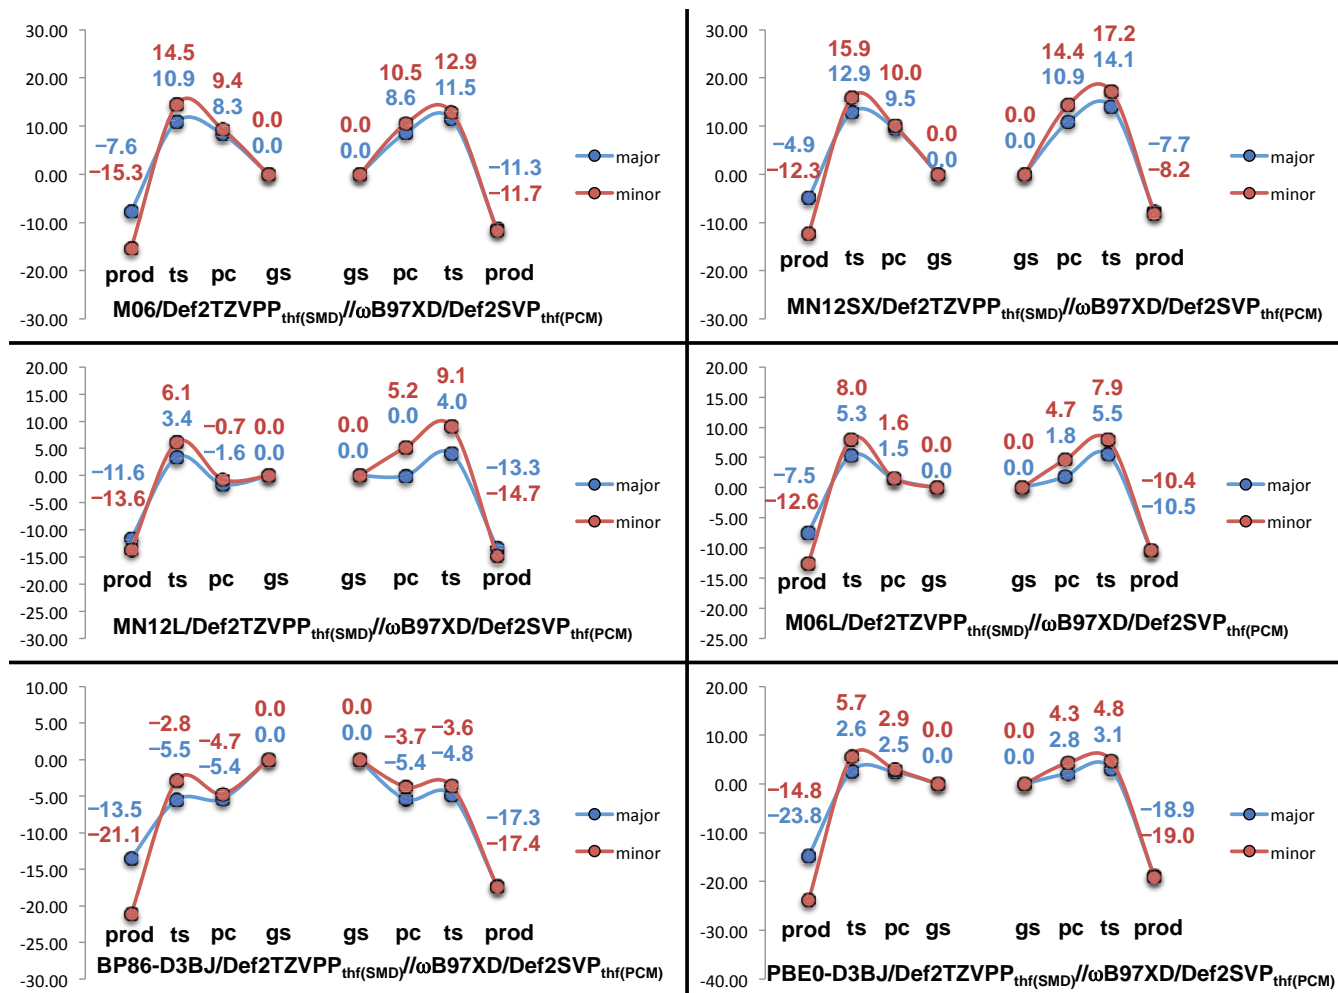

**Figure S5-2.** Free energy surfaces ( $\Delta G$ , kcal/mol) for pathways leading to the major and minor enantiomers for 1,6-addition of a pinacolatoboron substituted allyl group to a dienophile with ligands **9d** (left) and **9b** (right) relative to the allyl-Cu intermediate bearing a deprotonated NHC ligand (Na bridge) with various density functionals after geometry optimization with  $\omega$ B97XD/Def2SVP<sub>THF(PCM)</sub>.

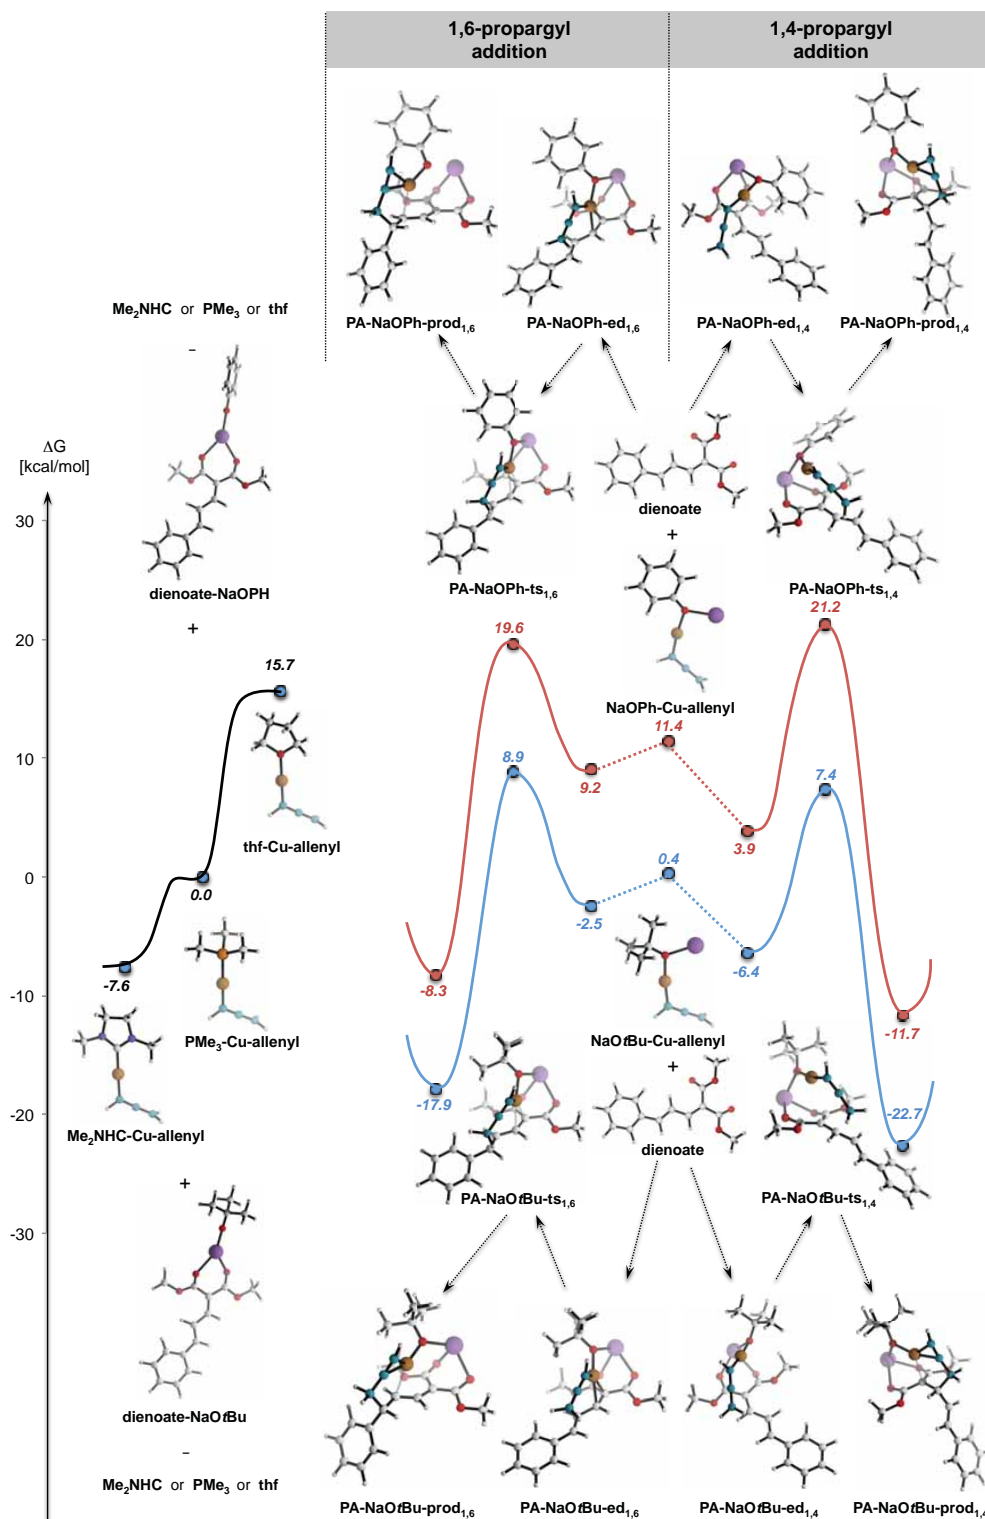

**Figure S6-1.** Free energy surfaces ( $\Delta G$ , kcal/mol) for the background reactions promoted by NaOtBu (blue) or NaOPh (red) leading to 1,6-addition or 1,4-addition of a propargyl group to a dienoate relative to various allenyl Cu intermediates bearing either a model NHC ligand (Me<sub>2</sub>C<sub>3</sub>H<sub>4</sub>N<sub>2</sub>, **Me<sub>2</sub>NHC-Cu-allenyl**), a model phosphine ligand (PMe<sub>3</sub>, **PMe<sub>3</sub>-Cu-allenyl**) or a THF molecule (**THF-Cu-allenyl**) at the  $\omega$ B97XD/Def2TZVPP<sub>THF(SMD)</sub>// $\omega$ B97XD/Def2SVP<sub>THF(PCM)</sub> level of theory.

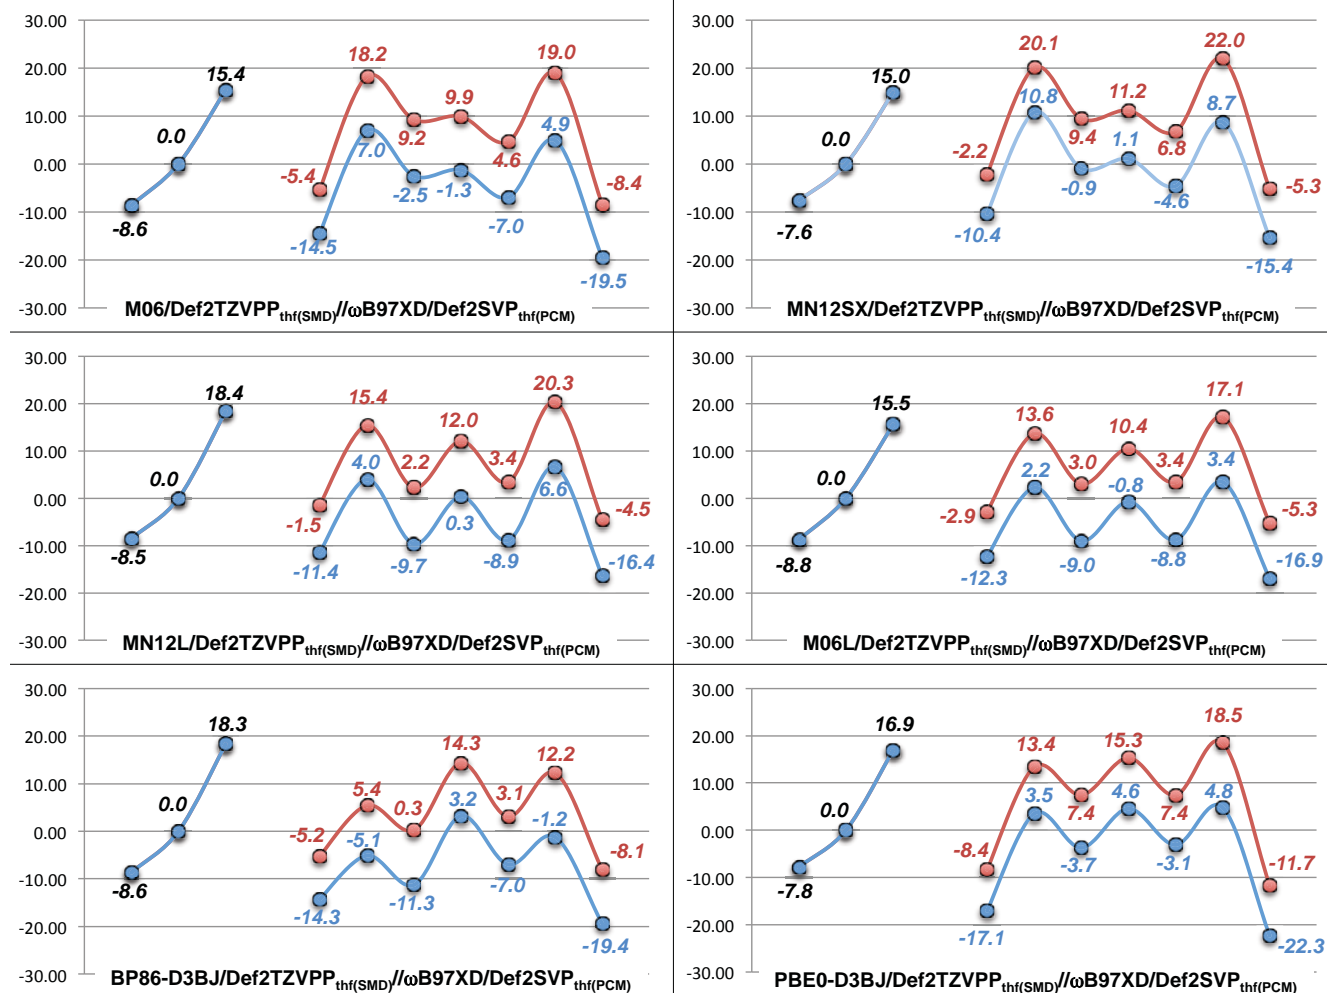

**Figure S6-2.** Free energy surfaces ( $\Delta G$ , kcal/mol) for the background reactions promoted by NaOt-Bu (blue) or NaOPh (red) leading to 1,6-addition or 1,4-addition of a propargyl group to a dienophile relative to various allenyl Cu intermediates bearing either a model NHC ligand ( $\text{Me}_2\text{C}_3\text{H}_4\text{N}_2$ , **Me<sub>2</sub>NHC-Cu-allenyl**), a model phosphine ligand ( $\text{PMe}_3$ , **PMe<sub>3</sub>-Cu-allenyl**) or a THF molecule (**THF-Cu-allenyl**) with various density functionals after geometry optimization with  $\omega$ B97XD/Def2SVP<sub>THF(PCM)</sub>.

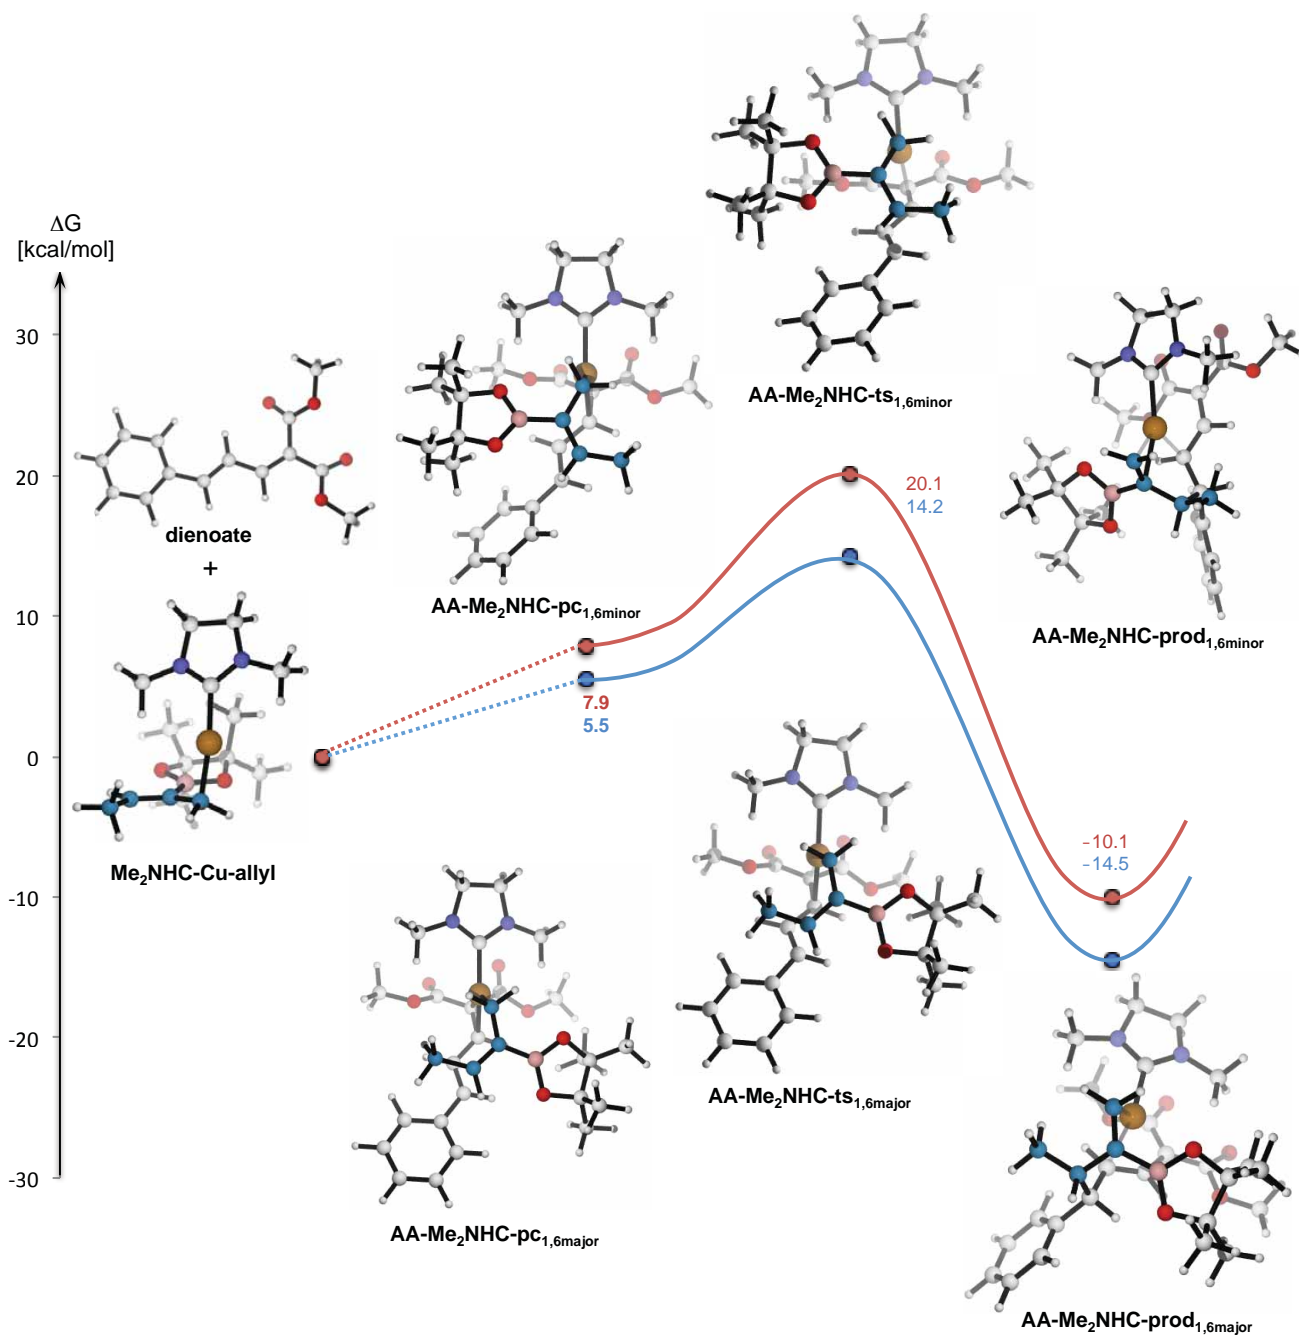

**Figure S7-1.** Free energy surfaces ( $\Delta G$ , kcal/mol) for the pathways leading to the major and minor diastereomer of 1,6-addition of a pinacolboron substituted allyl group to a dienoate relative to allyl-Cu intermediate bearing a model NHC ligand ( $\text{Me}_2\text{C}_3\text{H}_4\text{N}_2$ , **Me<sub>2</sub>NHC-Cu-allyl**) at the  $\omega\text{B97XD/Def2TZVPP}_{\text{thf(SMD)}}/\omega\text{B97XD/Def2SVP}_{\text{THF(PCM)}}$  level of theory.

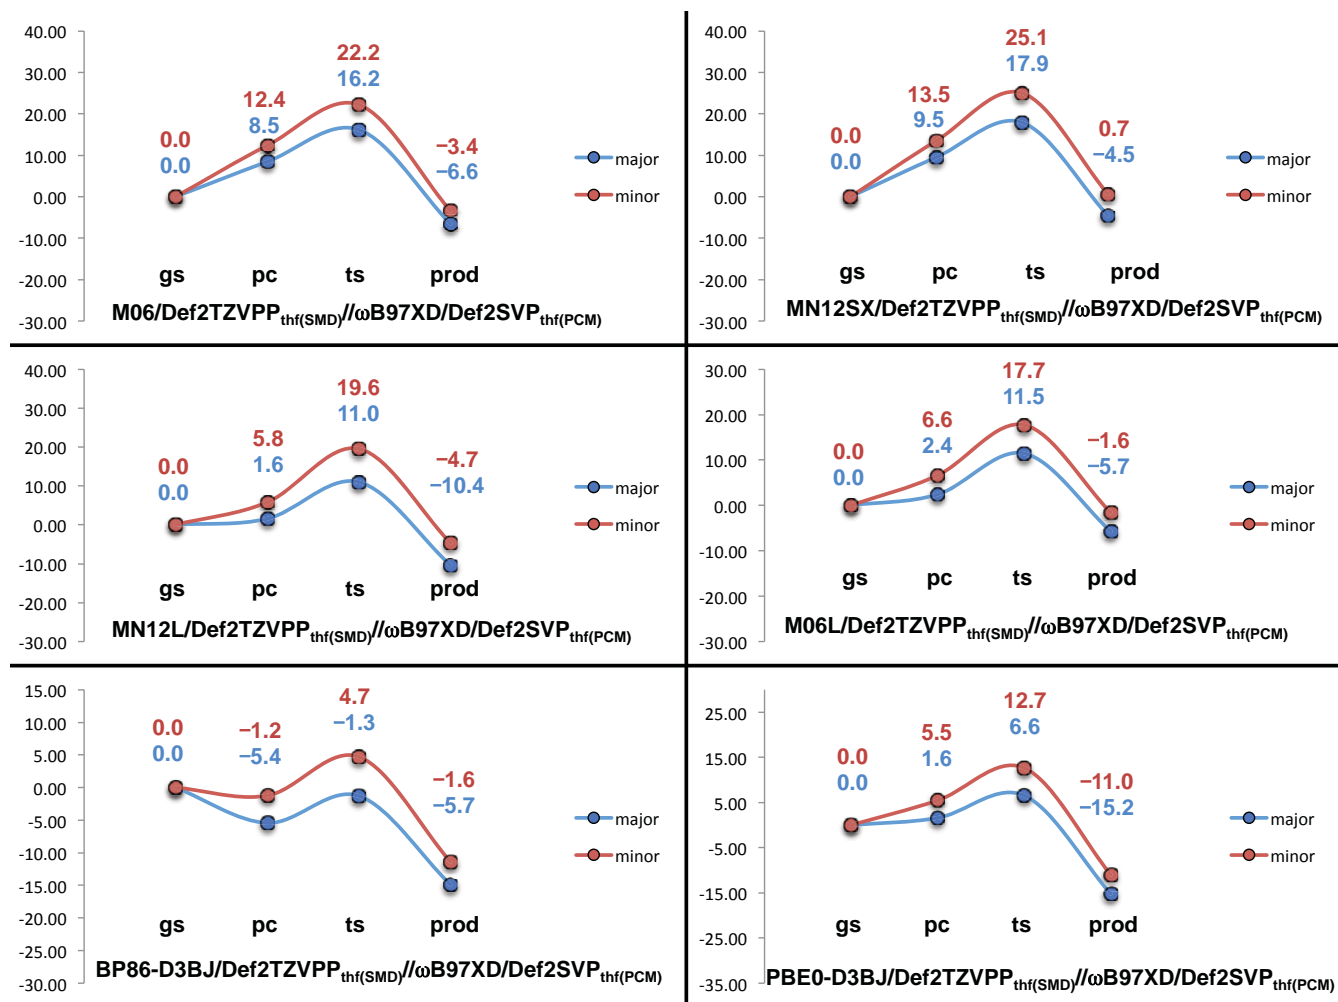

**Figure S7-2.** Free energy surfaces ( $\Delta G$ , kcal/mol) for the pathways leading to the major and minor diastereomer of 1,6-addition of a pinacolatoboron substituted allyl group to a dienoate relative to allyl-Cu intermediate bearing a model NHC ligand (Me<sub>2</sub>C<sub>3</sub>H<sub>4</sub>N<sub>2</sub>, Me<sub>2</sub>NHC-Cu-allenyl) with various density functionals after geometry optimization with ωB97XD/Def2SVP<sub>THF(PCM)</sub>.

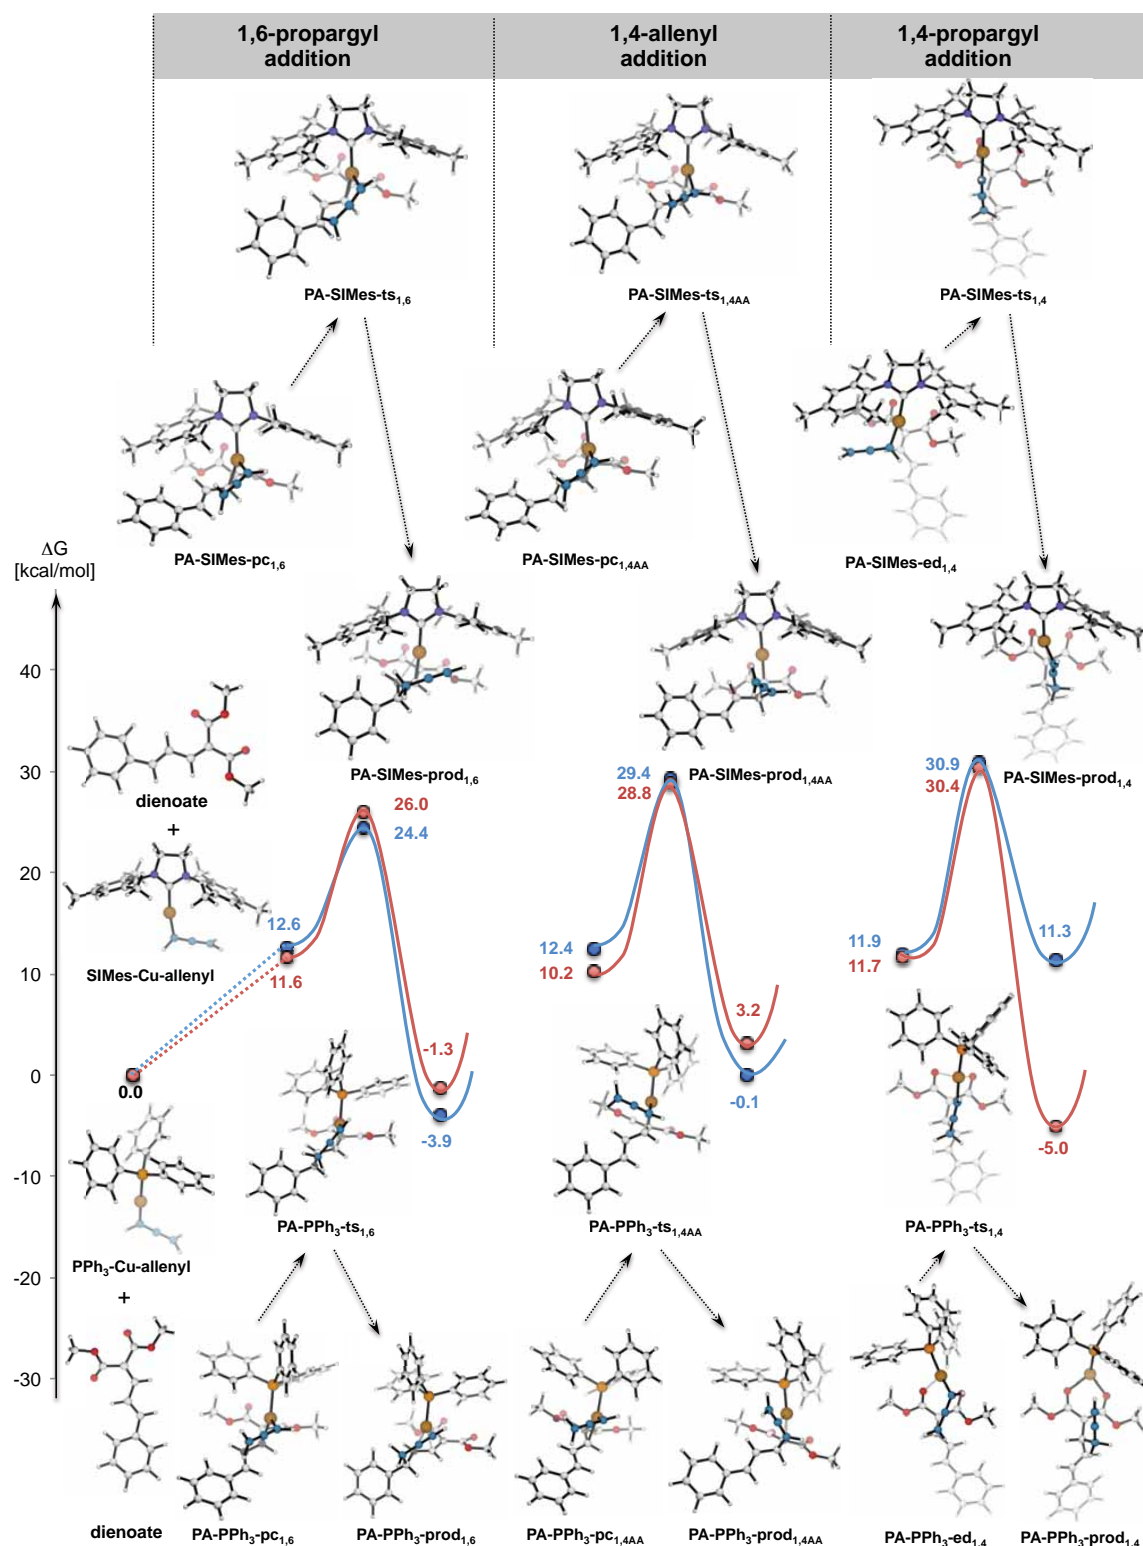

**Figure S8-1.** Free energy surfaces ( $\Delta G$ , kcal/mol) for the pathways leading 1,6-propargyl addition, 1,4-allenyl addition and 1,4-propargyl addition to a dienoate relative to allenyl Cu intermediate bearing either an NHC ligand (SIMes, blue) or a phosphine ligand (PPh<sub>3</sub>, red) at the  $\omega$ B97XD/Def2TZVPP<sub>THF(SMD)}/ $\omega$ B97XD/Def2SVP<sub>THF(PCM)</sub> level of theory.</sub>

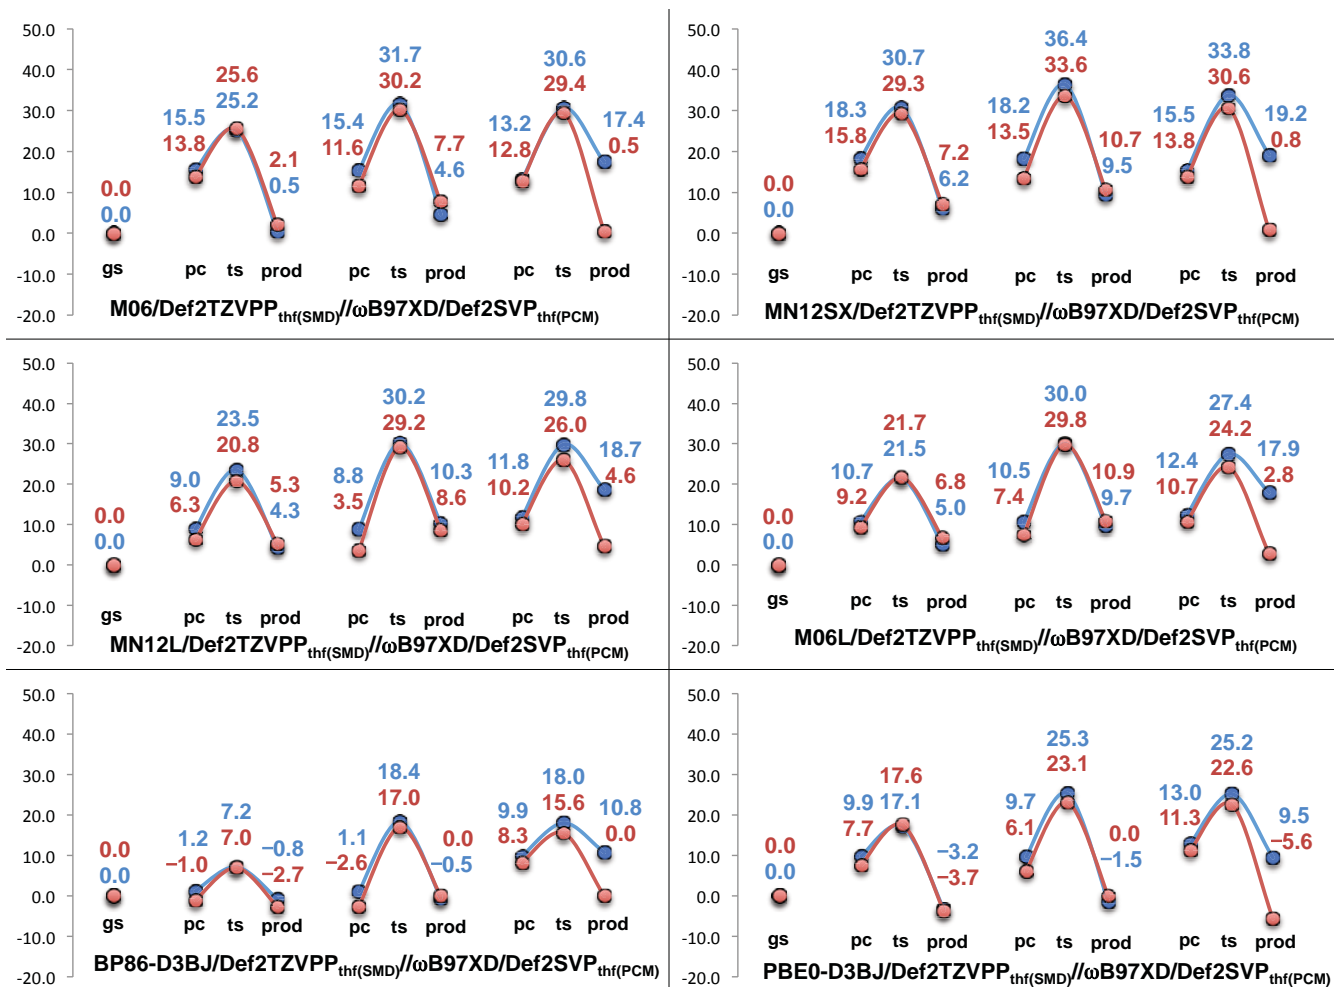

**Figure S8-2.** Free energy surfaces ( $\Delta G$ , kcal/mol) for the pathways leading 1,6-propargyl addition, 1,4-allenyl addition and 1,4-propargyl addition to a dienophile relative to allenyl-Cu intermediate bearing either an NHC ligand (SImes, blue) or a phosphine ligand (PPh<sub>3</sub>, red) with various density functionals after geometry optimization with  $\omega$ B97XD/Def2SVP<sub>THF(PCM)</sub>.

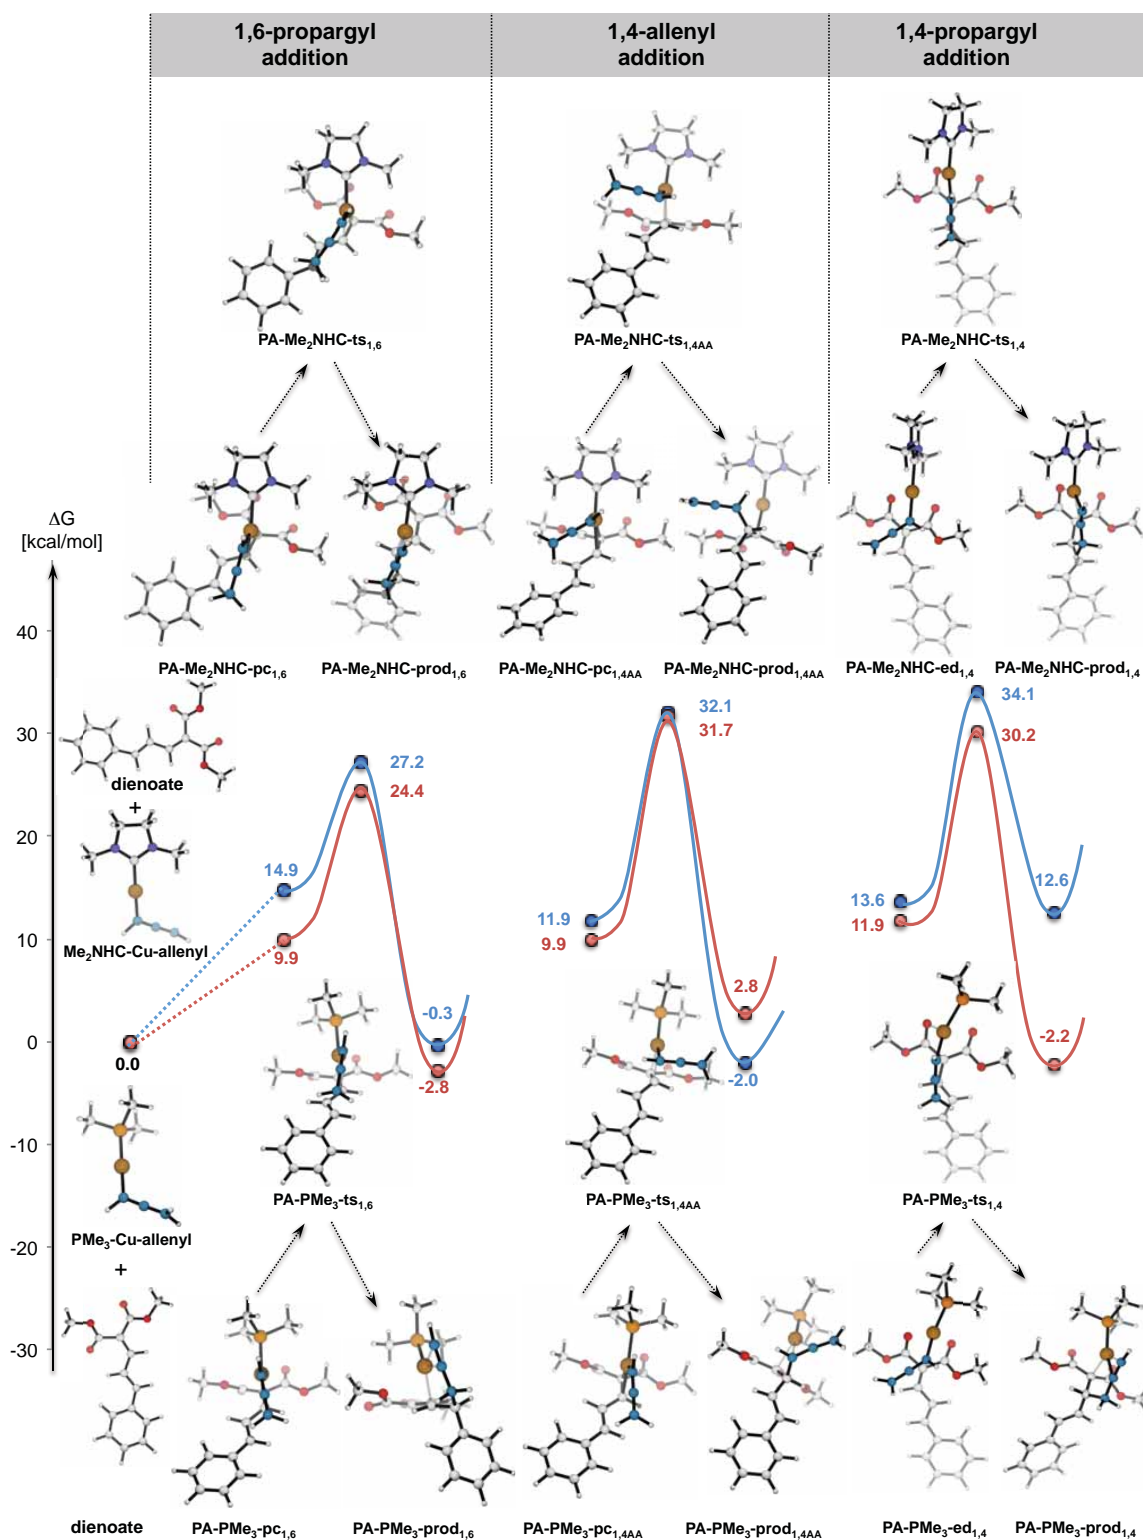

**Figure S9-1.** Free energy surfaces ( $\Delta G$ , kcal/mol) for the pathways leading 1,6-propargyl addition, 1,4-allenyl addition and 1,4-propargyl addition to a dienophile relative to allenyl–Cu intermediate bearing either a model NHC ligand (Me<sub>2</sub>C<sub>3</sub>H<sub>4</sub>N<sub>2</sub>, blue) or a model phosphine ligand (PMe<sub>3</sub>, red) at the  $\omega$ B97XD/Def2TZVPP<sub>THF</sub>(SMD)// $\omega$ B97XD/Def2SVP<sub>THF</sub>(PCM) level of theory.



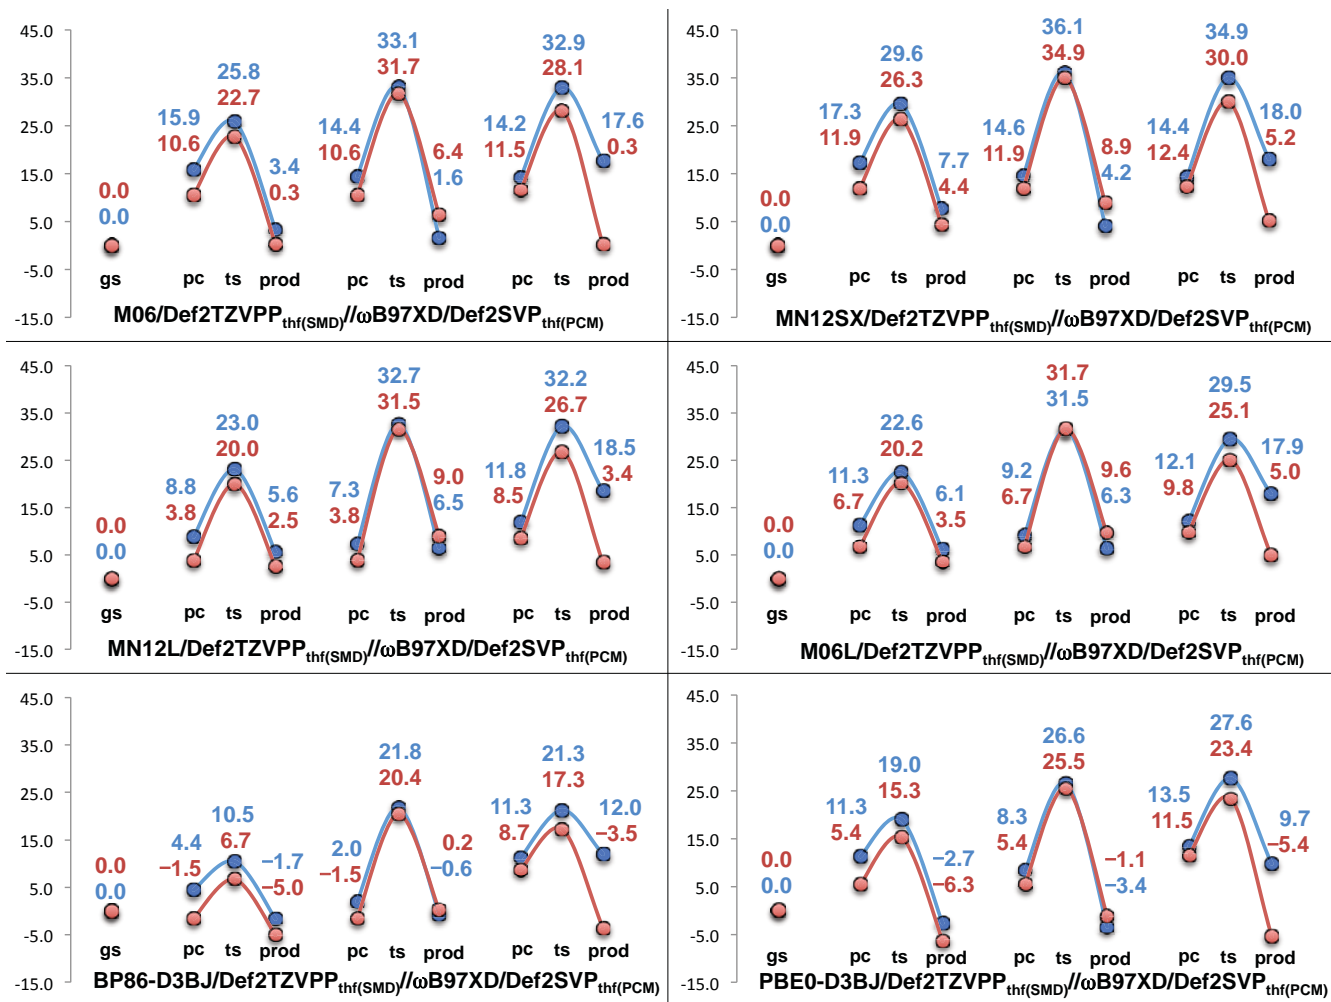

**Figure S9-2.** Free energy surfaces ( $\Delta G$ , kcal/mol) for the pathways leading to 1,6-propargyl addition, 1,4-allenyl addition and 1,4-propargyl addition to a dienoate relative to an allenyl-Cu intermediate bearing either a model NHC ligand ( $\text{Me}_2\text{C}_3\text{H}_4\text{N}_2$ , blue) or a model phosphine ligand ( $\text{PMe}_3$ , red) with various density functionals after geometry optimization with  $\omega$ B97XD/Def2SVP<sub>THF(PCM)</sub>.

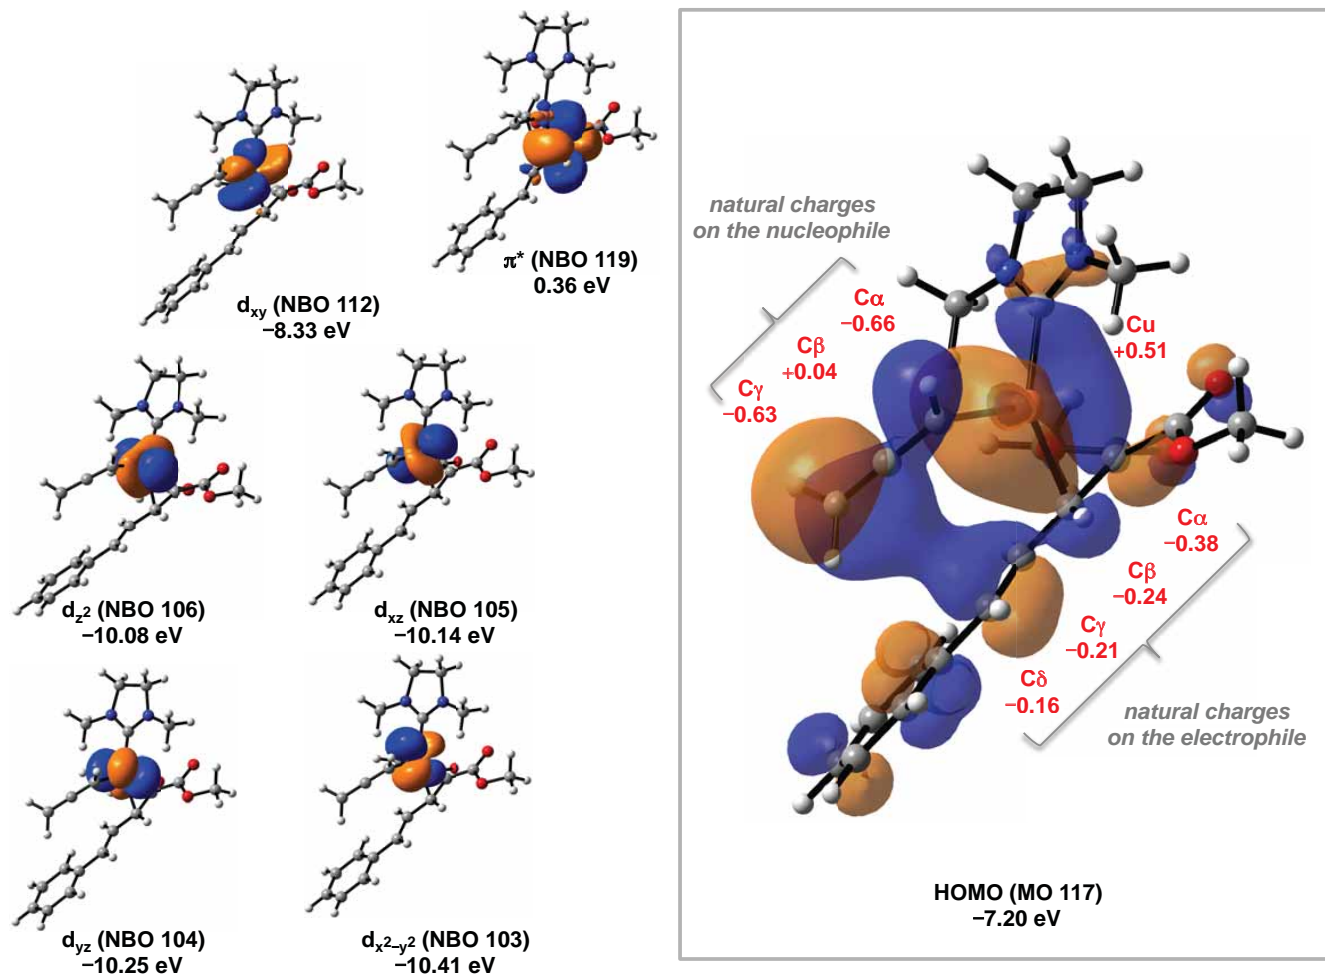

**Figure S9-3.** Natural bond orbital analysis (NBO; highest NBO = NBO 117) and HOMO (MO 117) for  $\pi$ -complex PA-Me<sub>2</sub>NHC-pc<sub>1,4AA</sub> at the  $\omega$ B97XD/Def2TZVPP<sub>THF(SMD)</sub>// $\omega$ B97XD/Def2SVP<sub>THF(PCM)</sub> level of theory.

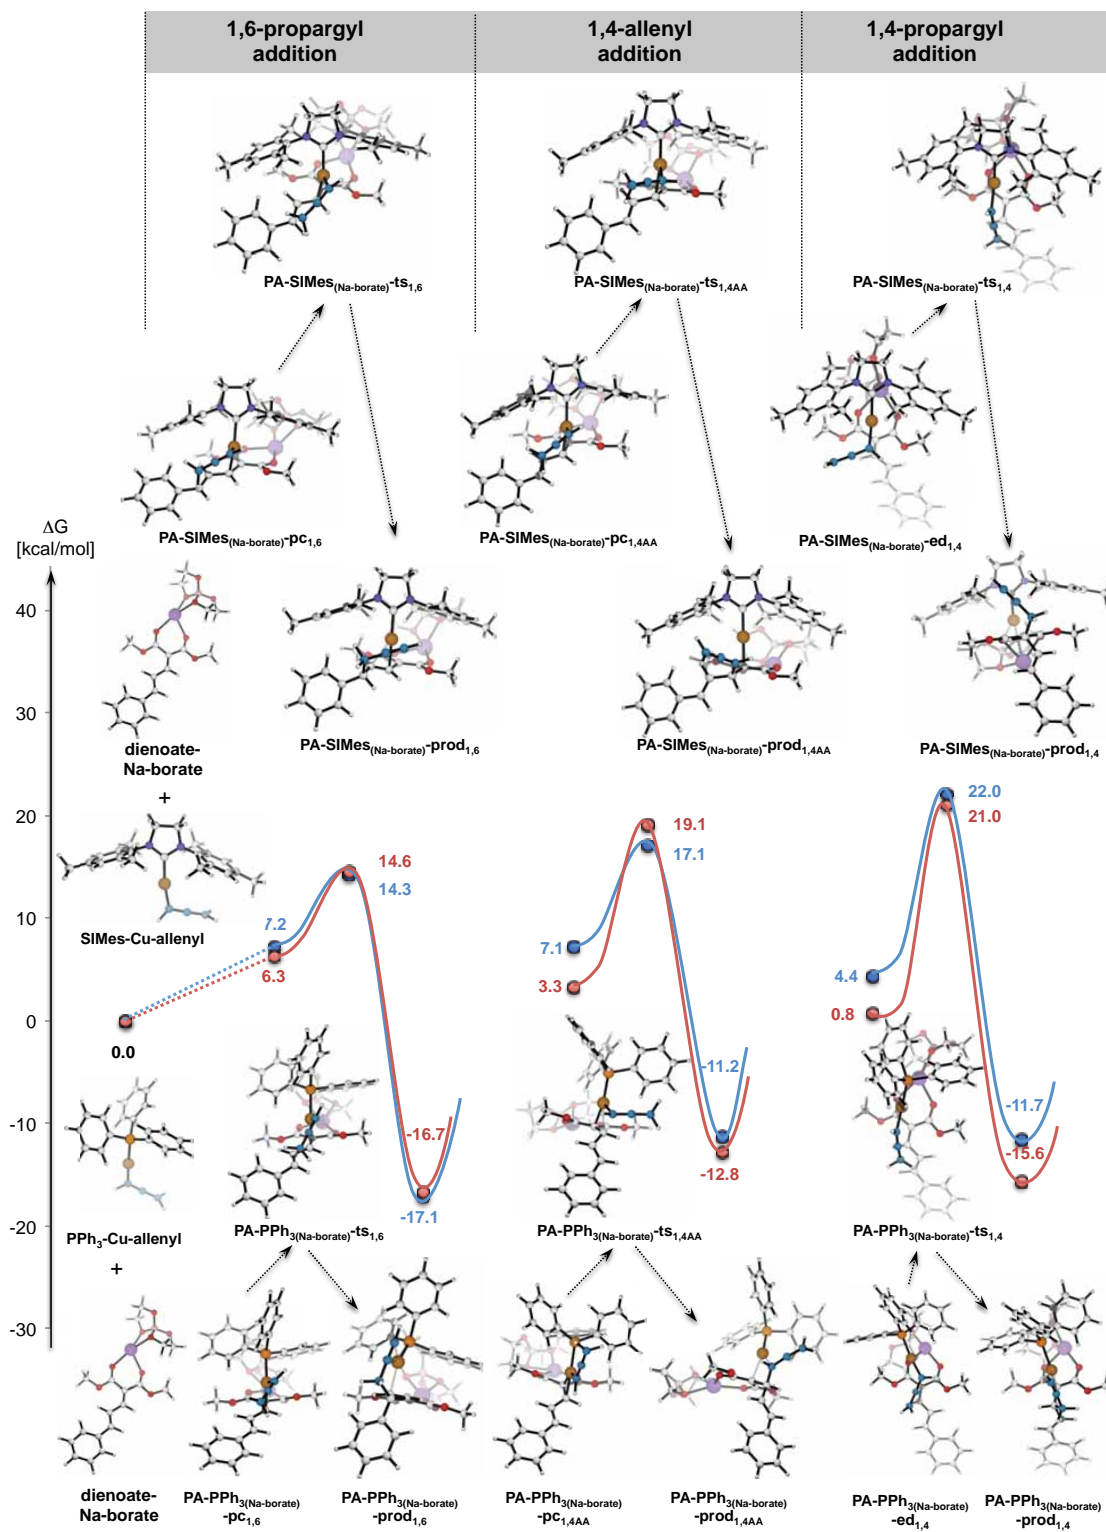

**Figure S10-1.** Free energy surfaces ( $\Delta G$ , kcal/mol) for the pathways leading 1,6-propargyl addition, 1,4-allenyl addition and 1,4-propargyl addition to a dienolate bearing a model Na-borate relative to allenyl-Cu intermediate bearing either an NHC ligand (SIMes, blue) or a phosphine ligand (PPh<sub>3</sub>, red) at the  $\omega$ B97XD/Def2TZVP<sub>THF(SMD)</sub>// $\omega$ B97XD/Def2SVP<sub>THF(PCM)</sub> level of theory.

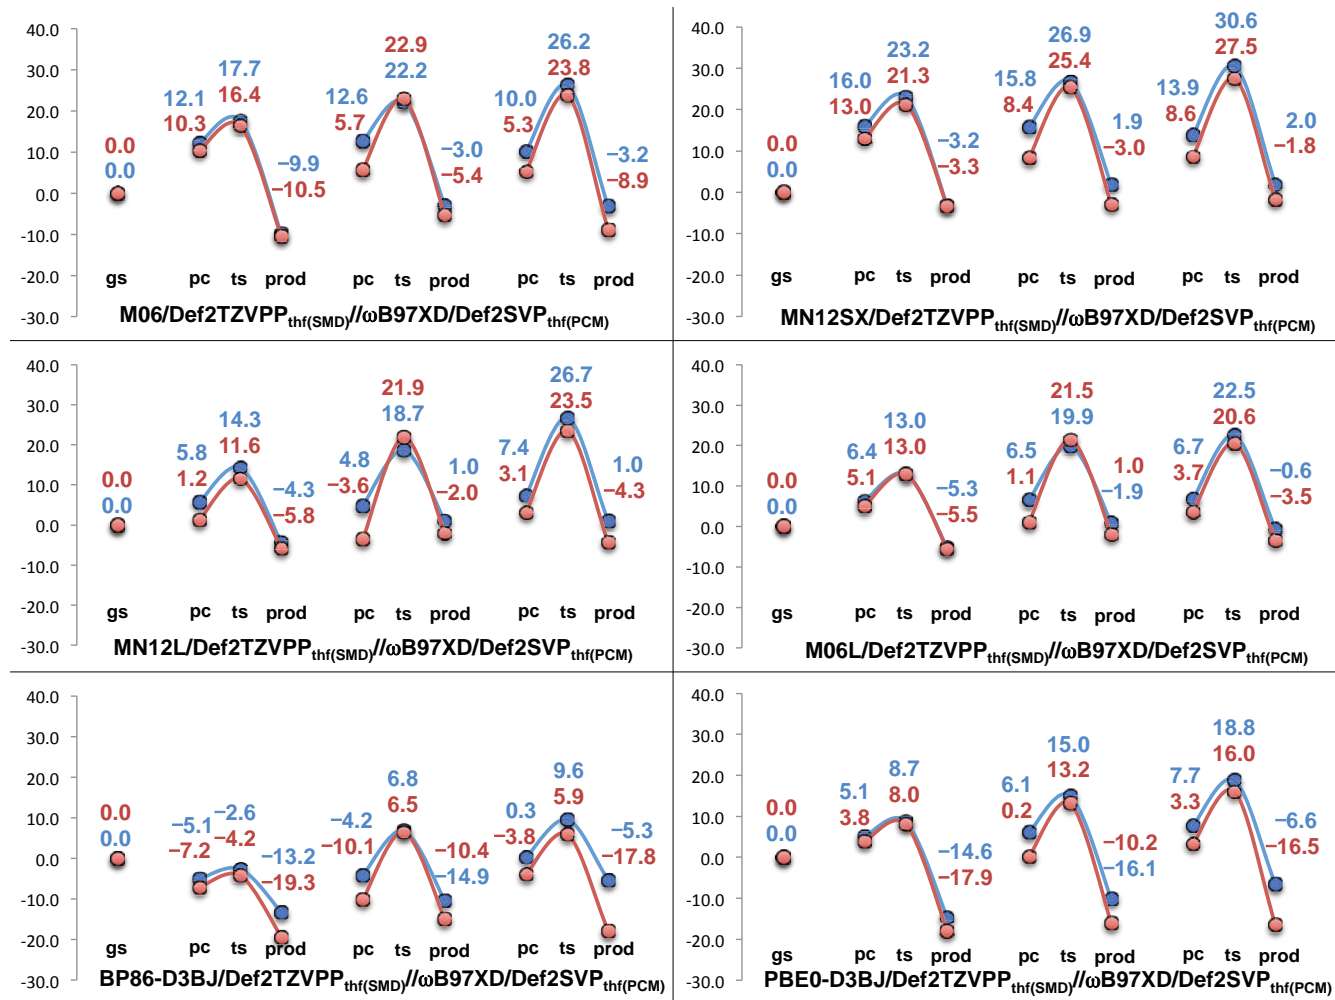

**Figure S10-2.** Free energy surfaces ( $\Delta G$ , kcal/mol) for the pathways leading to 1,6-propargyl addition, 1,4-allenyl addition and 1,4-propargyl addition to a dienophile bearing a model Na-borate relative to allenyl-Cu intermediate bearing either an NHC ligand (SImes, blue) or a phosphine ligand ( $\text{PPh}_3$ , red) with various density functionals after geometry optimization with  $\omega$ B97XD/Def2SVP<sub>THF(PCM)</sub>.

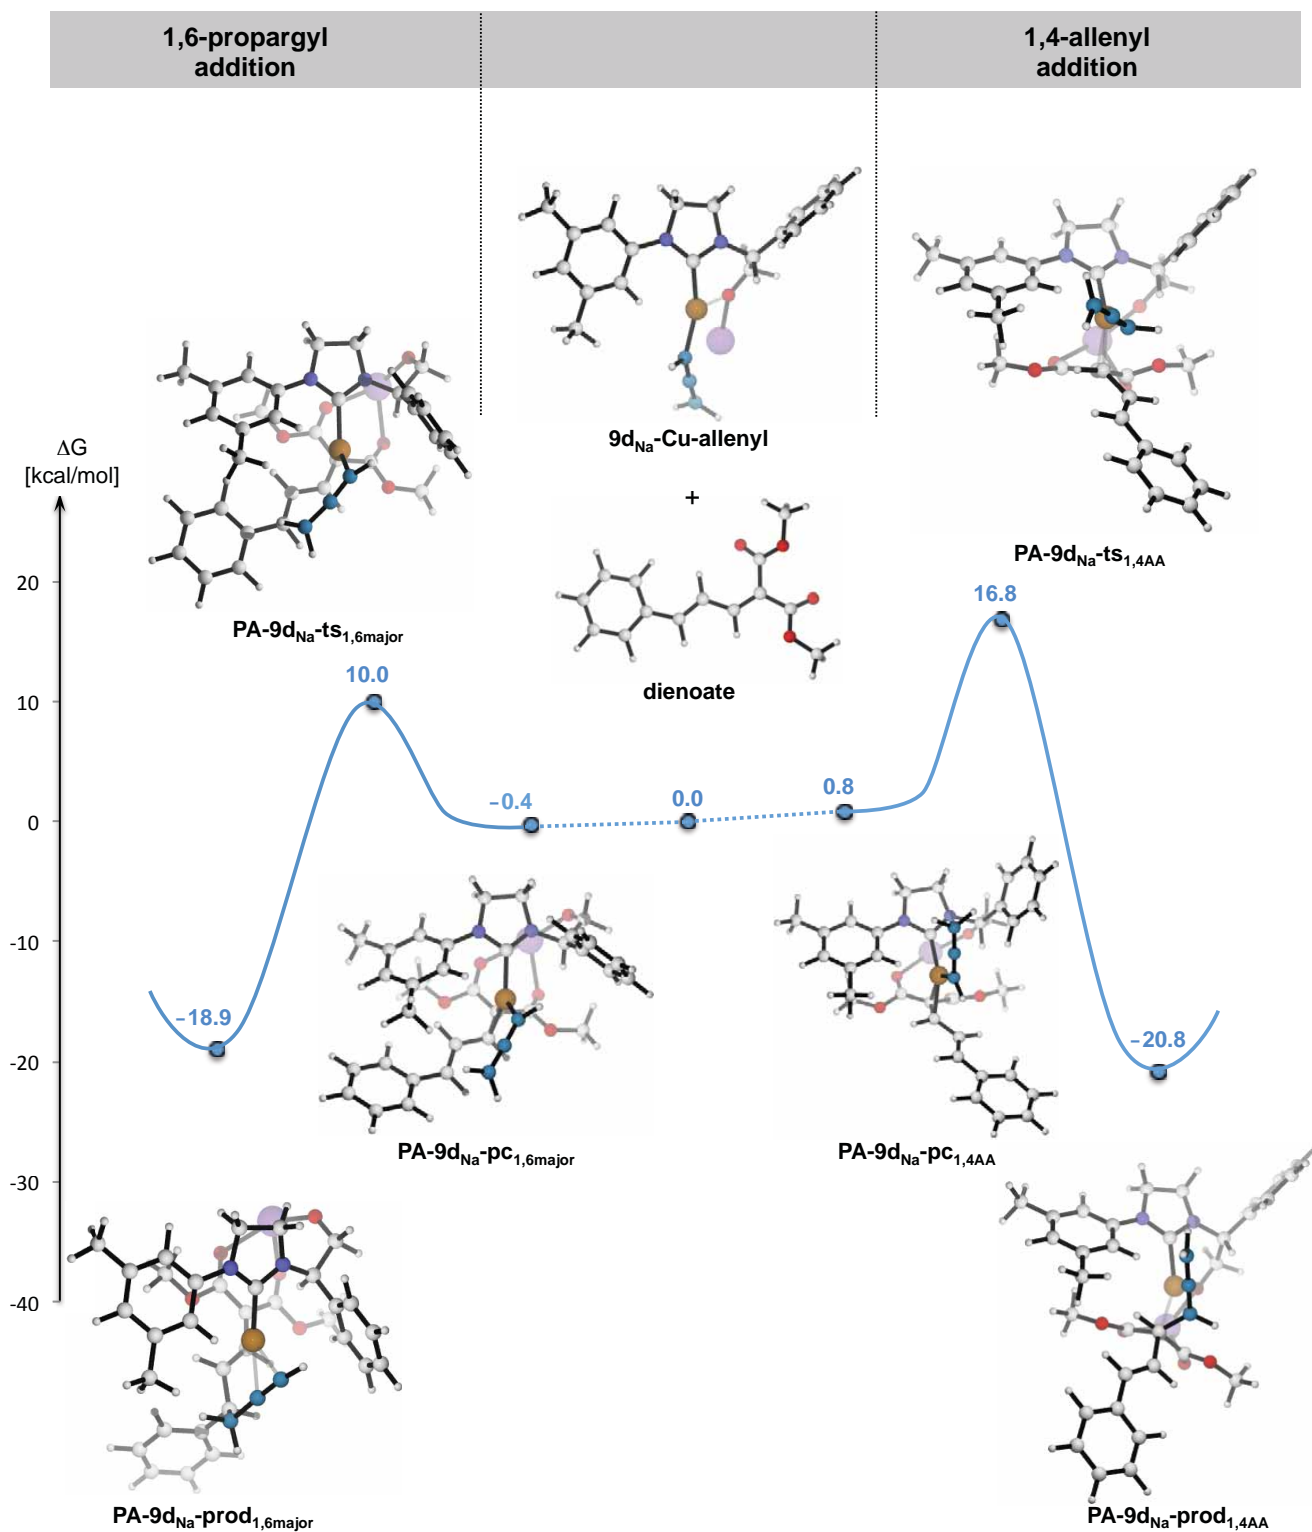

**Figure S11-1.** Free energy surface ( $\Delta G$ , kcal/mol) for the pathways leading 1,6-propargyl addition and 1,4-allenyl addition to a dienolate relative to allenyl-Cu intermediate bearing either NHC ligand **9d** at the  $\omega$ B97XD/Def2TZVPP<sub>THF(SMD)</sub>// $\omega$ B97XD/Def2SVP<sub>THF(PCM)</sub> level of theory.

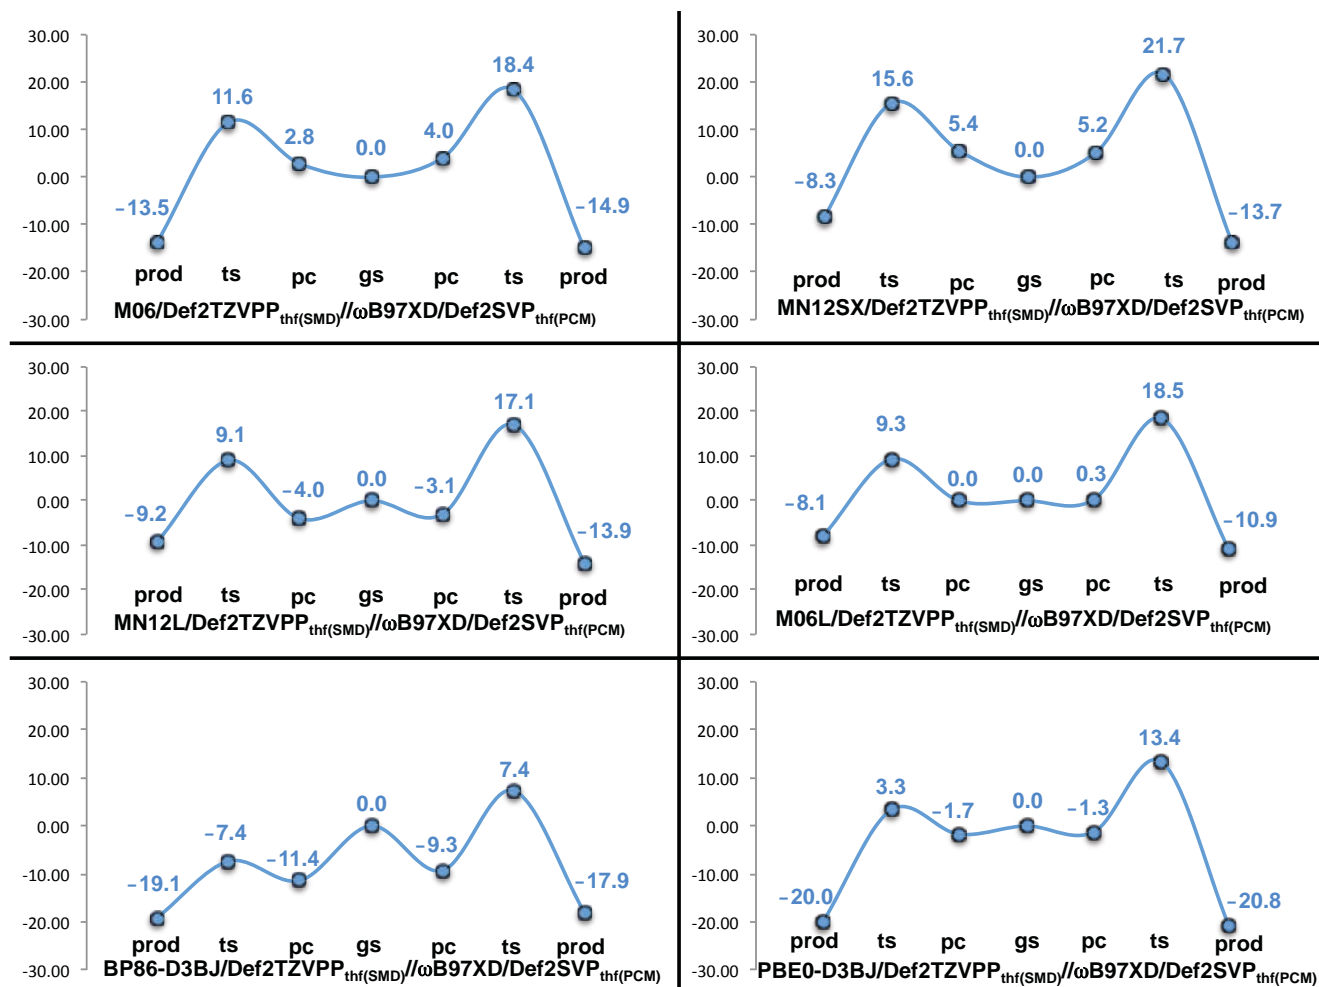

**Figure S11-2.** Free energy surface ( $\Delta G$ , kcal/mol) for the pathways leading 1,6-propargyl addition and 1,4-allenyl addition to a dienophile relative to allenyl-Cu intermediate bearing either NHC ligand **9d** with various density functionals after geometry optimization with  $\omega$ B97XD/Def2SVP<sub>THF(PCM)</sub>.

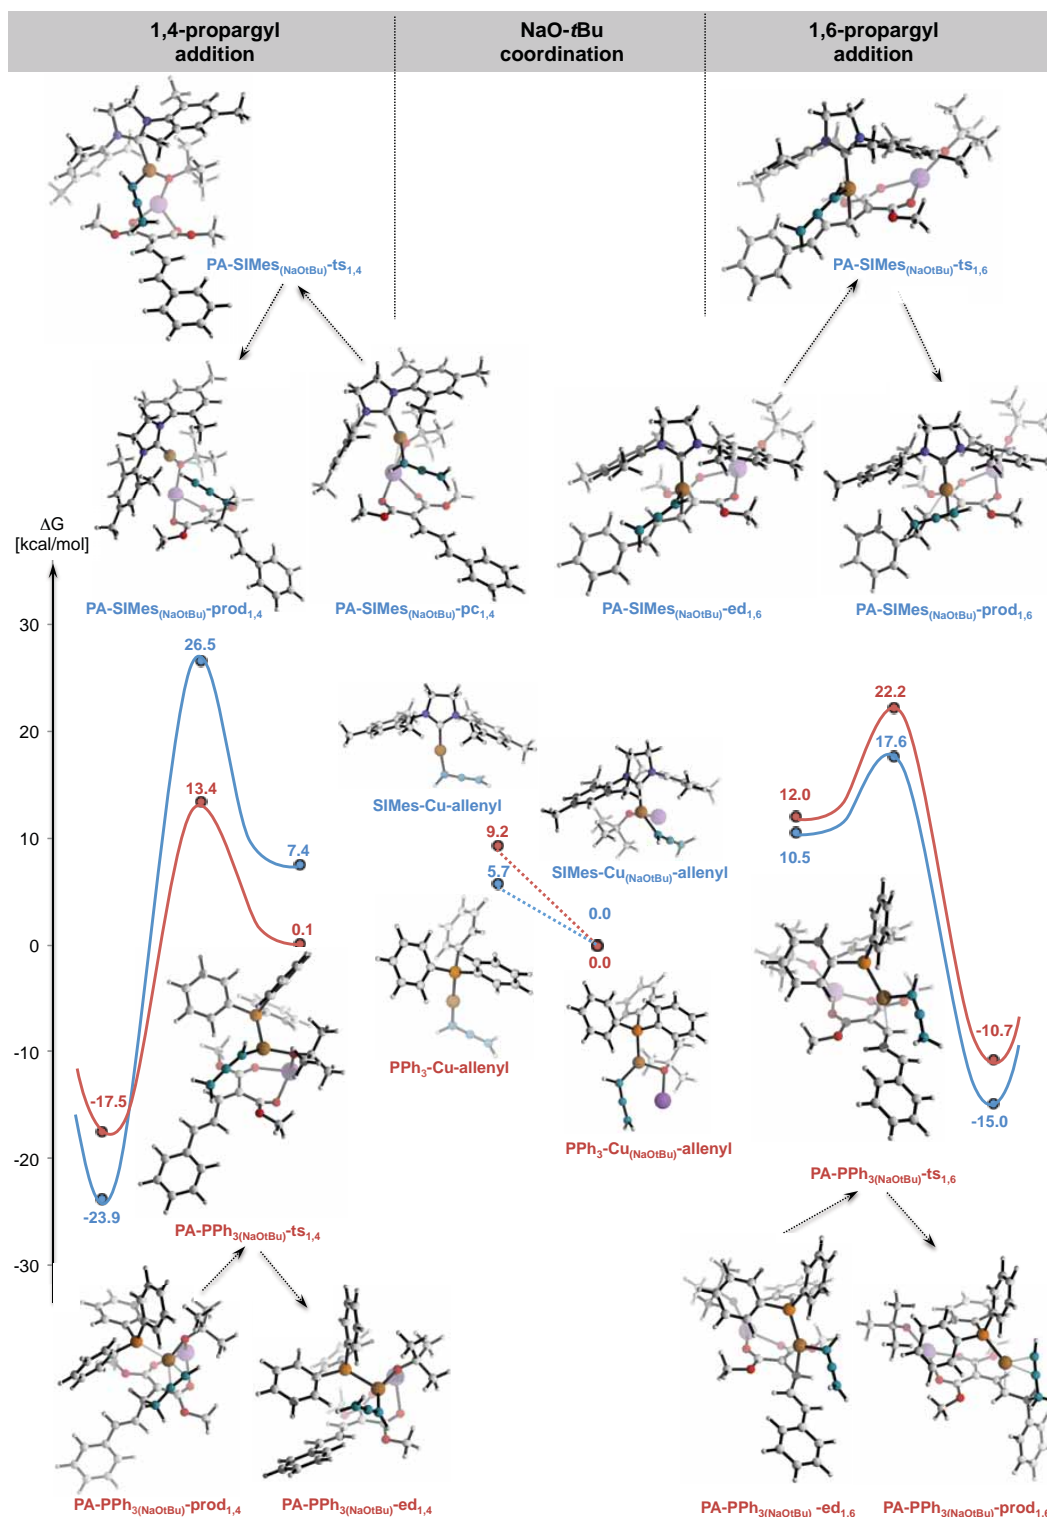

**Figure S12-1.** Free energy surfaces ( $\Delta G$ , kcal/mol) for the pathways leading 1,4-propargyl addition and 1,6-propargyl addition to a dienolate relative to allenyl-Cu intermediate bearing a Na-O*t*Bu molecule and either an NHC ligand (SImes, blue) or a phosphine ligand (PPh<sub>3</sub>, red) at the  $\omega$ B97XD/Def2TZVPP<sub>THF(SMD)}/ $\omega$ B97XD/Def2SVP<sub>THF(PCM)</sub> level of theory.</sub>

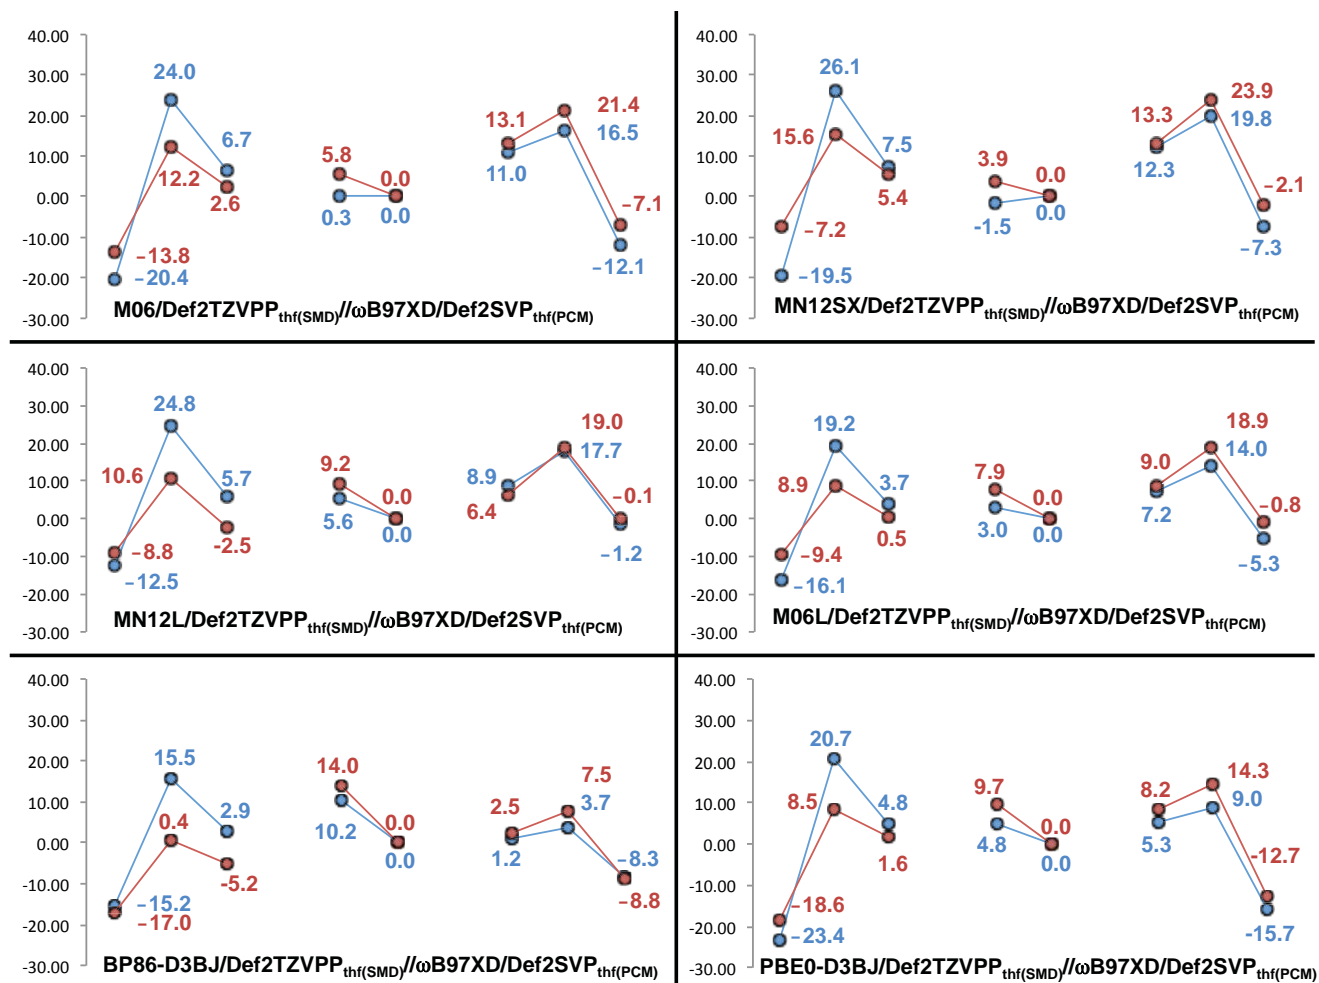

**Figure S12-2.** Free energy surfaces ( $\Delta G$ , kcal/mol) for the pathways leading 1,4-propargyl addition and 1,6-propargyl addition to a dienoate relative to allenyl-Cu intermediate bearing a Na-OtBu molecule and either an NHC ligand (SIMes, blue) or a phosphine ligand (PPh<sub>3</sub>, red) with various density functionals after geometry optimization with  $\omega$ B97XD/Def2SVP<sub>THF(PCM)</sub>.



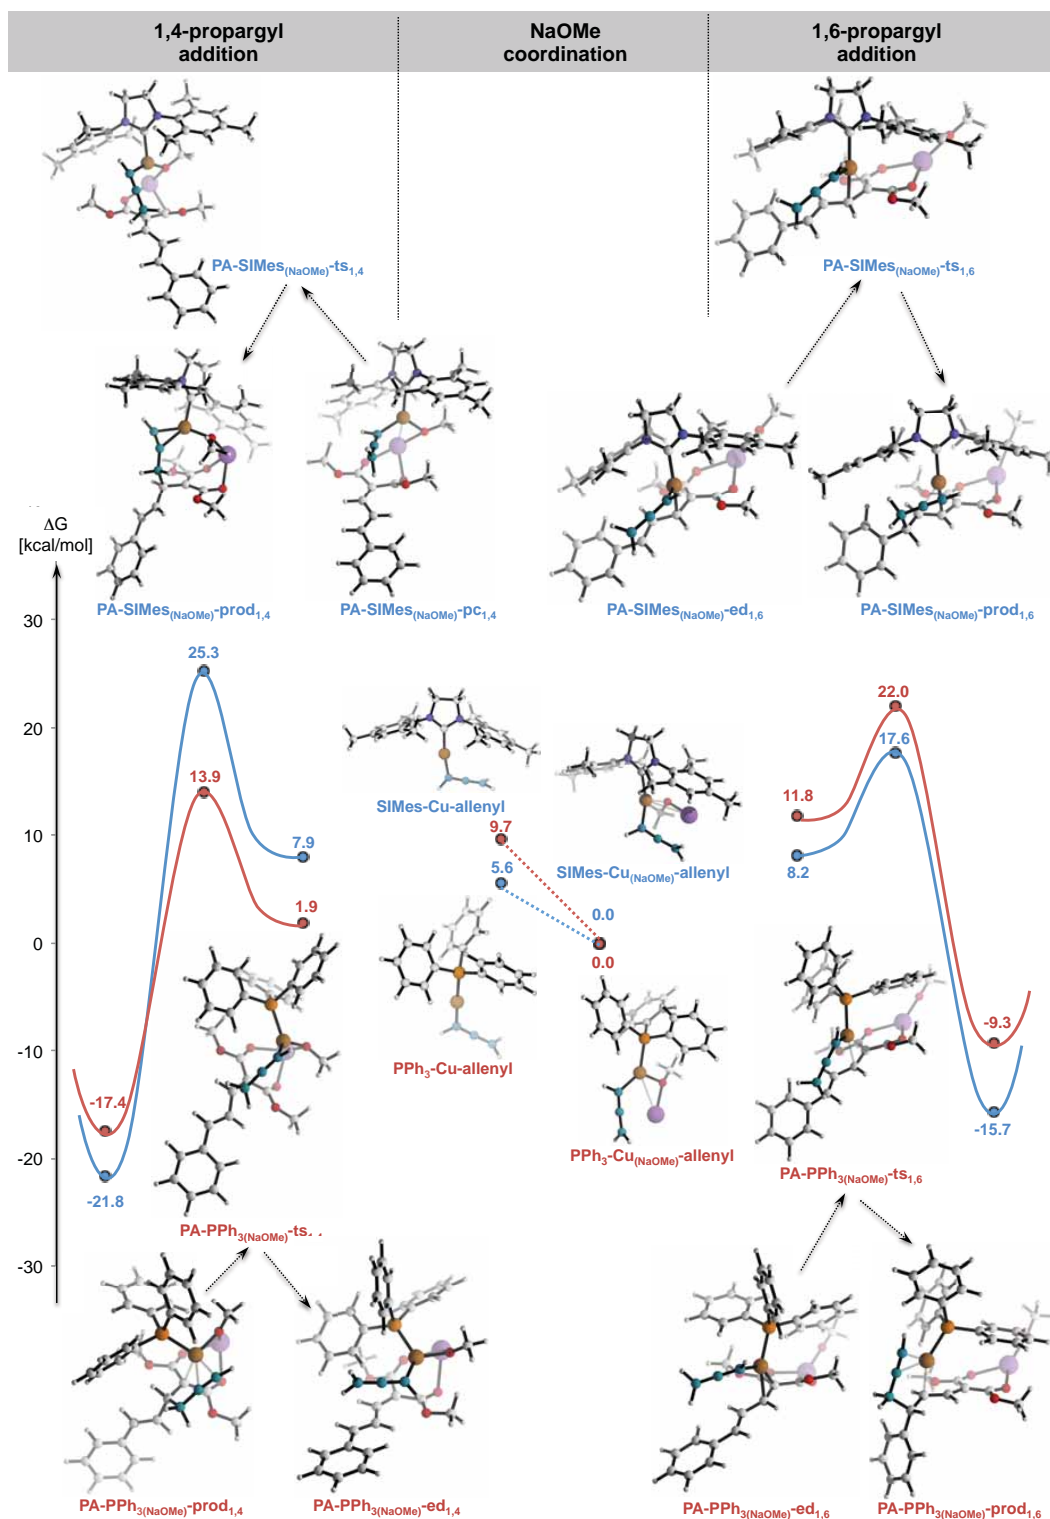

**Figure S13-1.** Free energy surfaces ( $\Delta G$ , kcal/mol) for the pathways leading 1,4-propargyl addition and 1,6-propargyl addition to a dienolate relative to allenyl–Cu intermediate bearing a Na–OMe molecule and either an NHC ligand (Simes, blue) or a phosphine ligand (PPh<sub>3</sub>, red) at the  $\omega$ B97XD/Def2TZVPP<sub>THF(SMD)}/ $\omega$ B97XD/Def2SVP<sub>THF(PCM)</sub> level of theory.</sub>

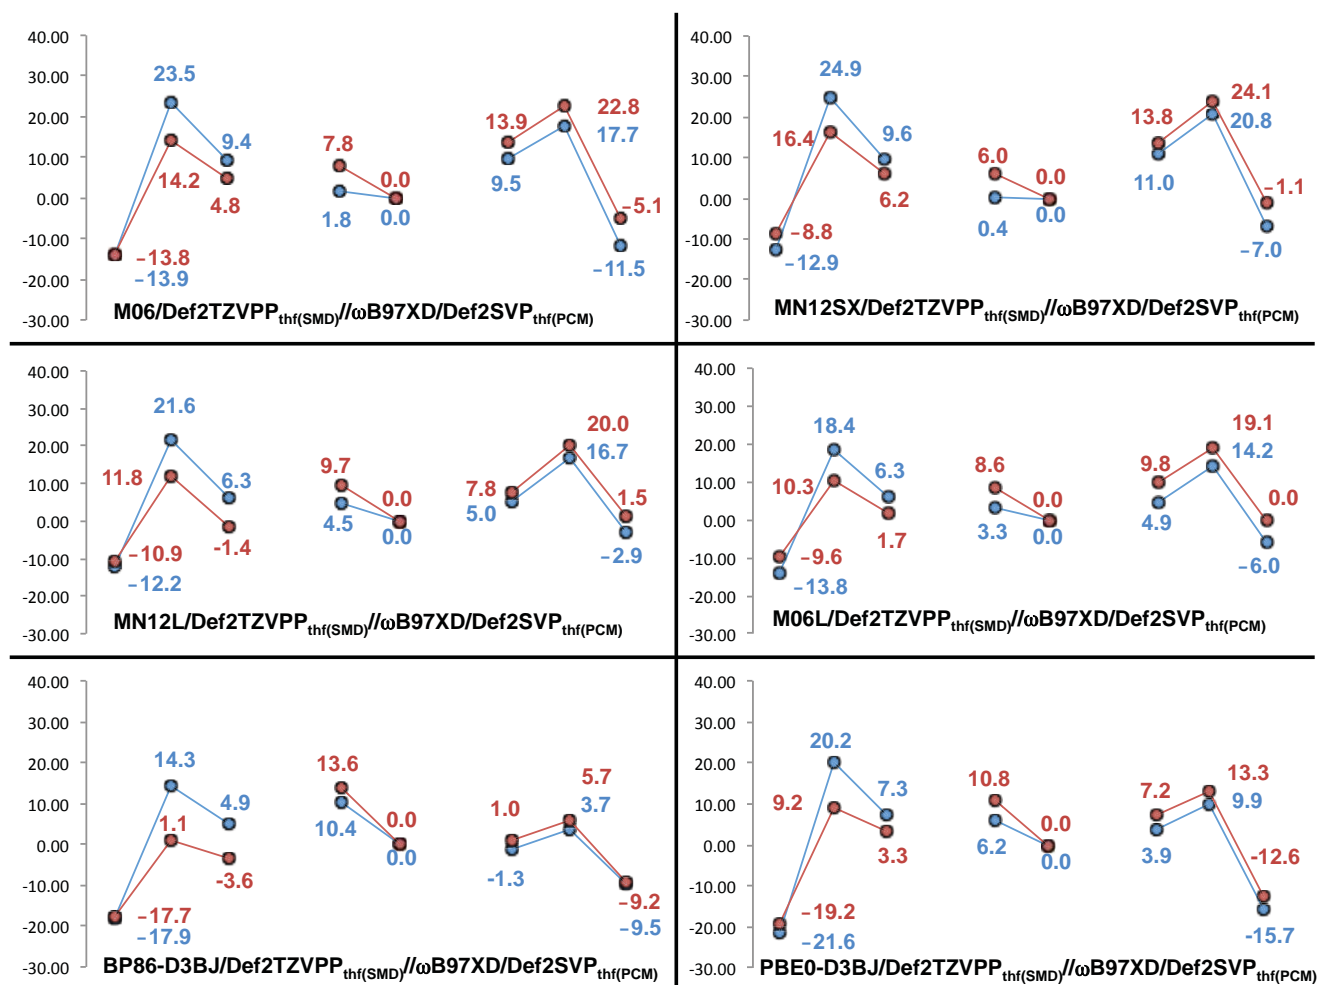

**Figure S13-2.** Free energy surfaces ( $\Delta G$ , kcal/mol) for the pathways leading to 1,4-propargyl addition and 1,6-propargyl addition to a dienoate relative to allenyl-Cu intermediate bearing a Na-OMe molecule and either an NHC ligand (SIMes, blue) or a phosphine ligand ( $\text{PPh}_3$ , red) with various density functionals after geometry optimization with  $\omega$ B97XD/Def2SVP<sub>THF(PCM)</sub>.

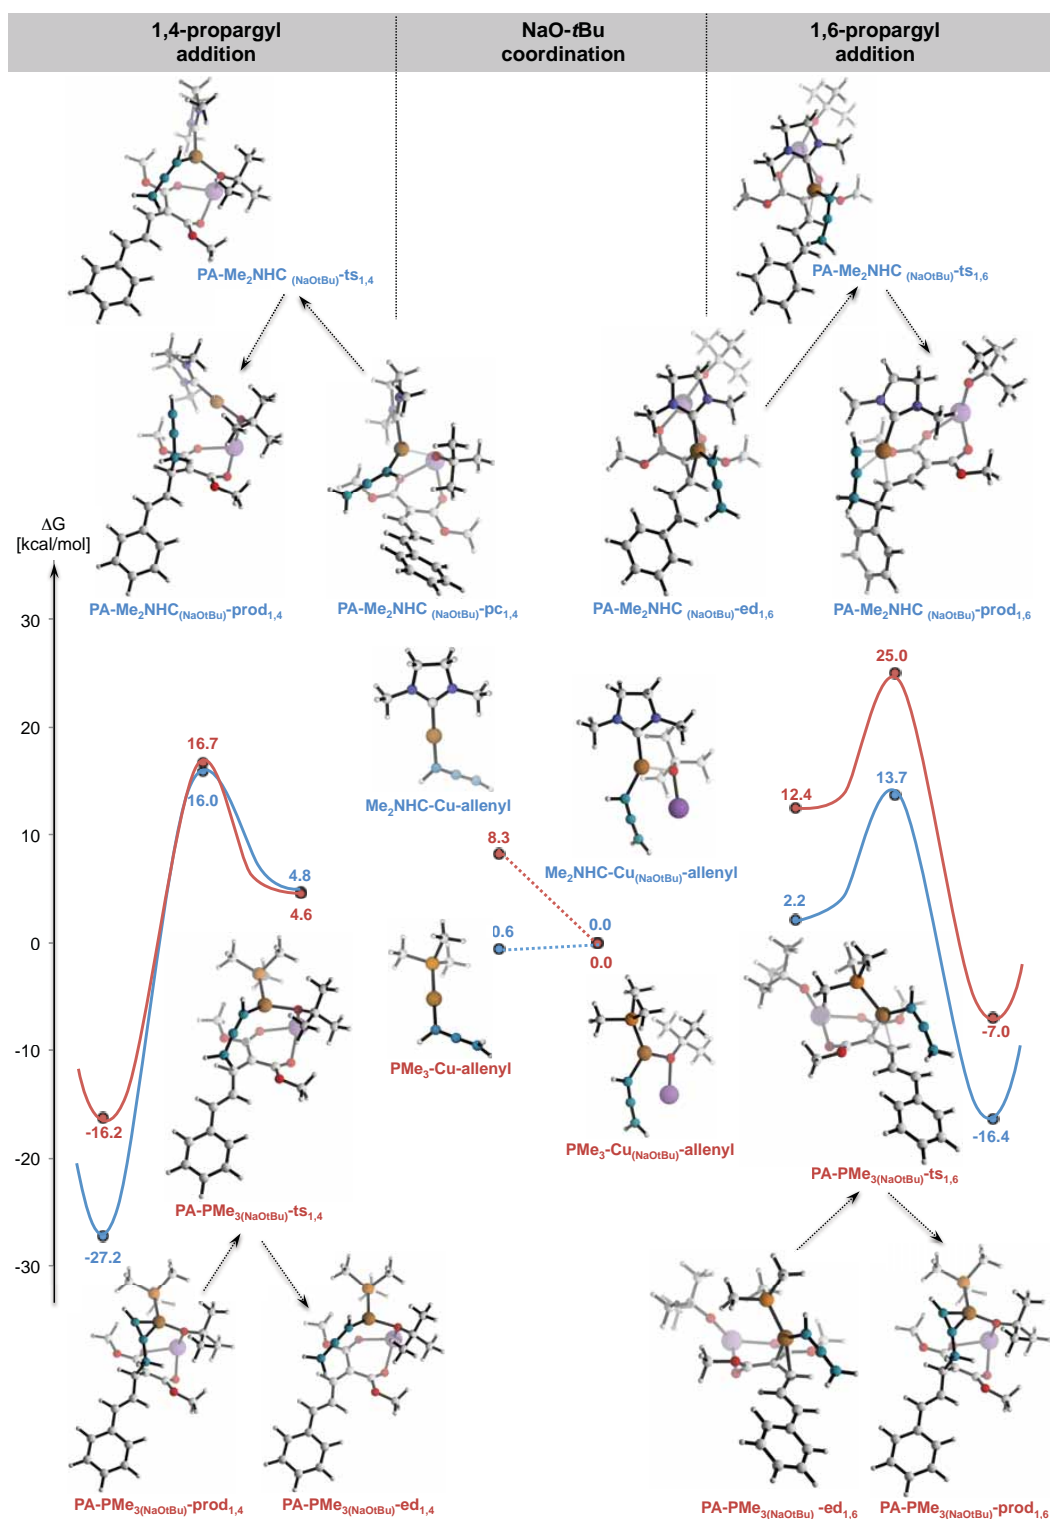

**Figure S14-1.** Free energy surfaces ( $\Delta G$ , kcal/mol) for the pathways leading 1,4-propargyl addition and 1,6-propargyl addition to a dienophile relative to allenyl-Cu intermediate bearing a Na-OtBu molecule and either a model NHC ligand (Me<sub>2</sub>NHC, blue) or a model phosphine ligand (PMe<sub>3</sub>, red) at the  $\omega$ B97XD/Def2TZVPP<sub>THF(SMD)</sub>// $\omega$ B97XD/Def2SVP<sub>THF(PCM)</sub> level of theory.

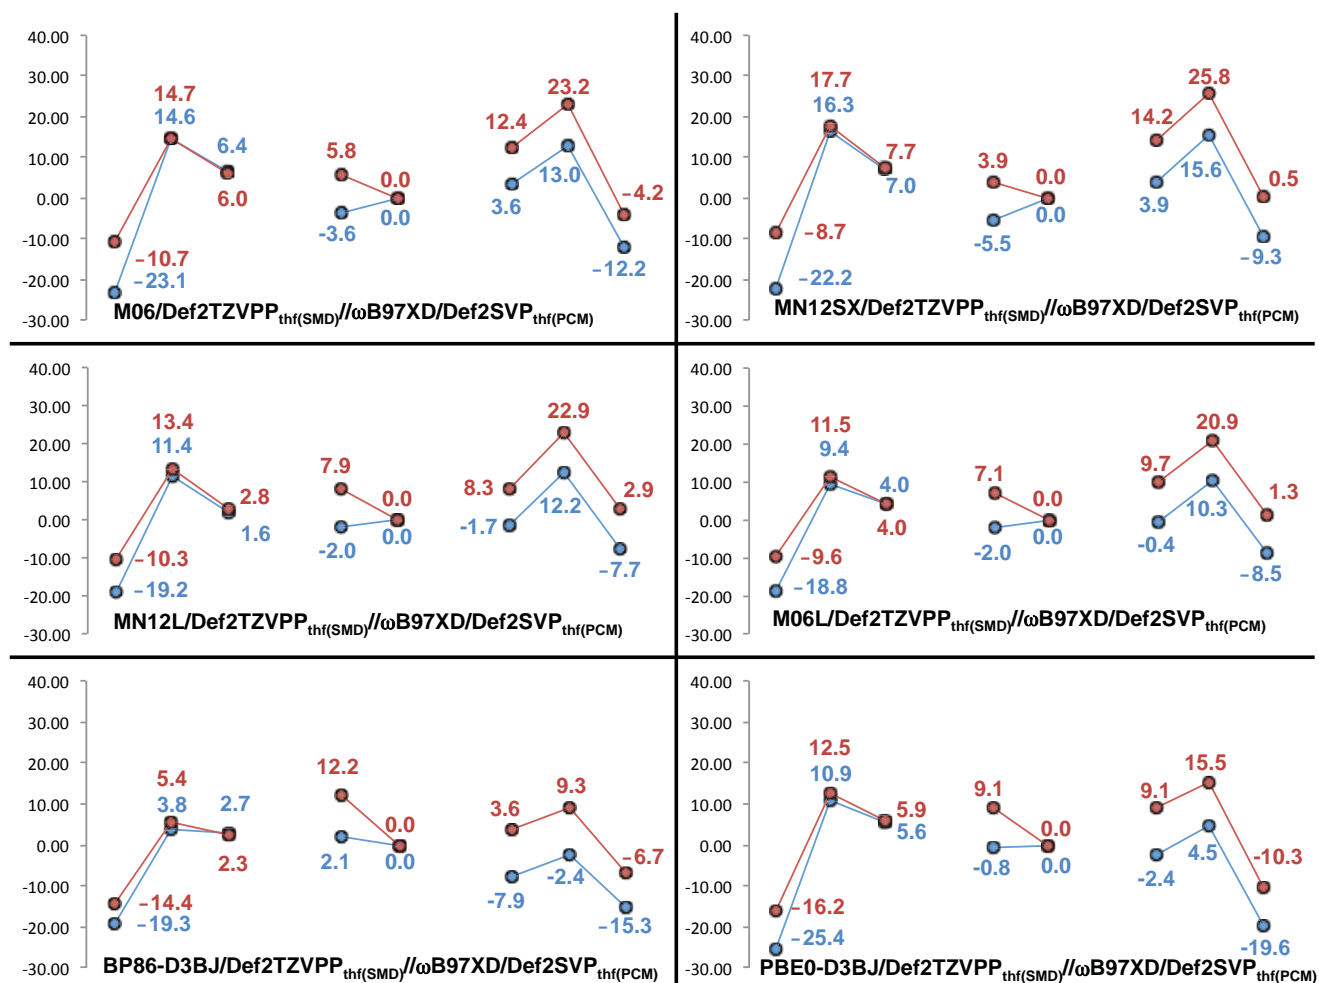

**Figure S14-2.** Free energy surfaces ( $\Delta G$ , kcal/mol) for the pathways leading 1,4-propargyl addition and 1,6-propargyl addition to a dienoate relative to allenyl-Cu intermediate bearing a Na-O*t*Bu molecule and either a model NHC ligand (Me<sub>2</sub>NHC, blue) or a model phosphine ligand (PMe<sub>3</sub>, red) with various density functionals after geometry optimization with  $\omega$ B97XD/Def2SVP<sub>thf(PCM)</sub>.

## Conformer distribution for transition states (Figures S15-1 to S15-9)

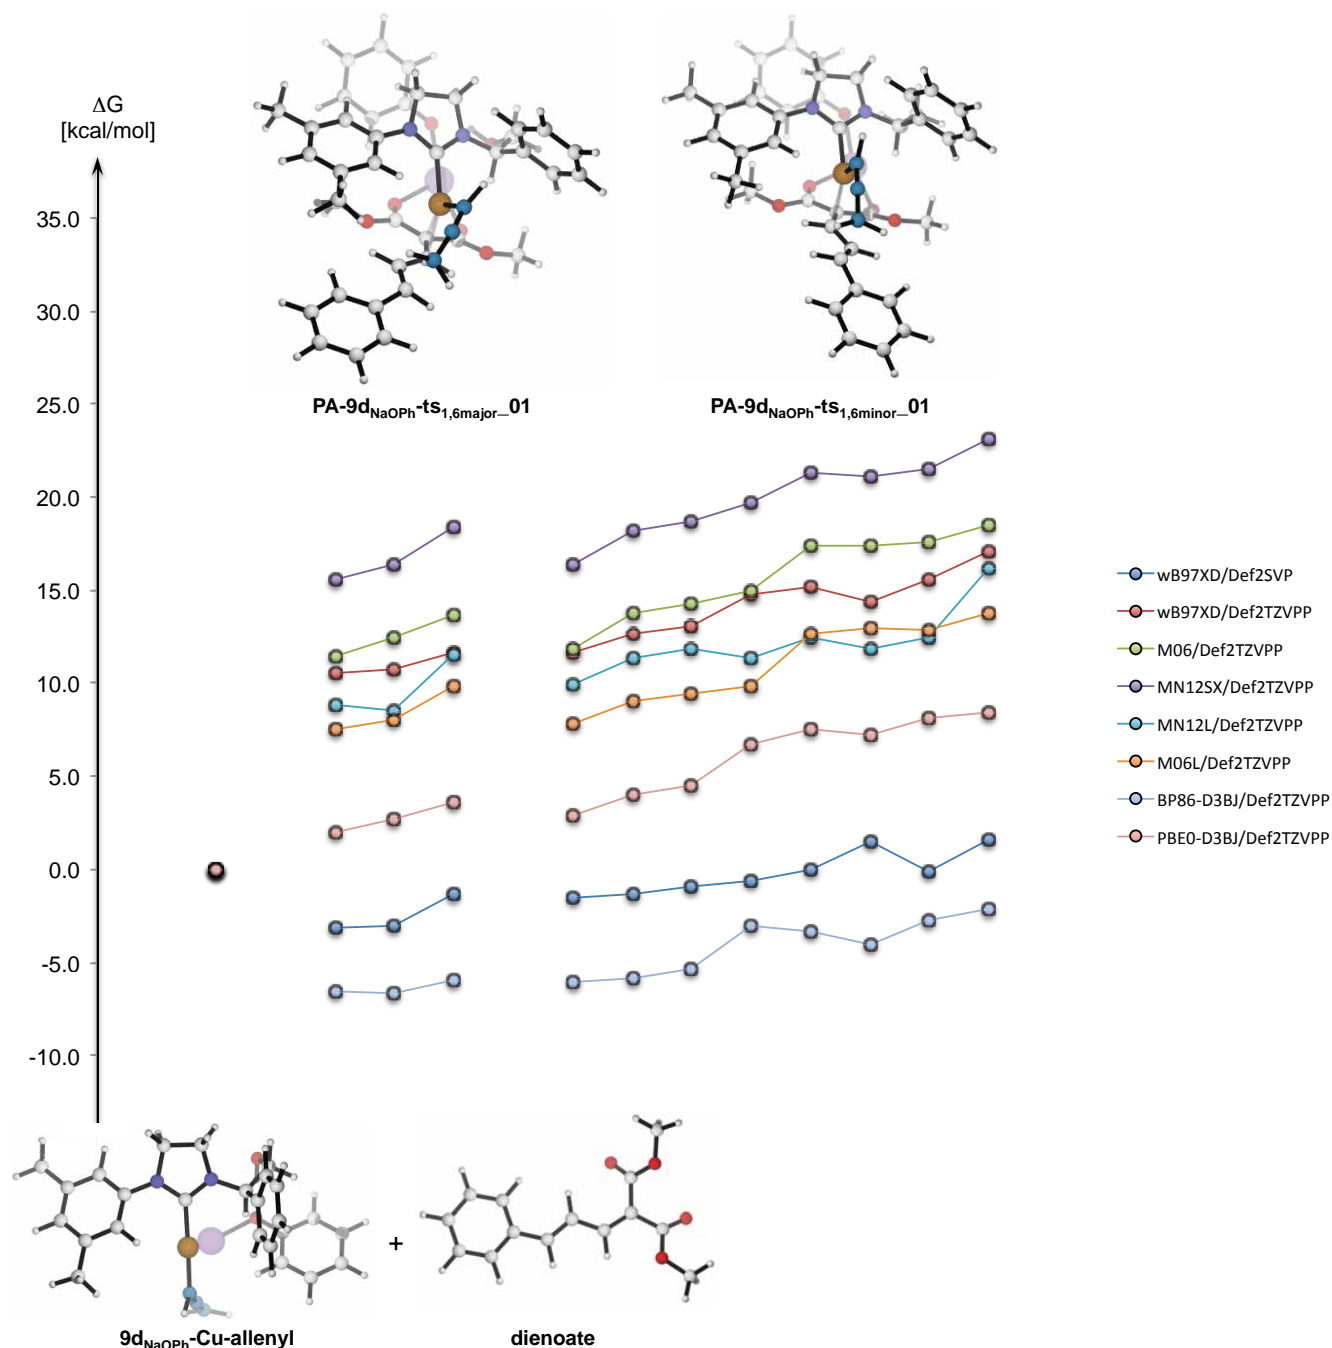

**Figure S15-1.** Conformer distribution ( $\Delta G$ , kcal/mol) for the major (**PA-9d<sub>NaOPh</sub>-ts<sub>1,6major</sub>\_01**) and minor (**PA-9d<sub>NaOPh</sub>-ts<sub>1,6minor</sub>\_01**) transition states leading 1,6-propargyl addition relative to allenyl-Cu intermediate **9d<sub>NaOPh</sub>-Cu-allenyl**; conformers are ordered from low to high energy according to the M06/Def2TZVPP<sub>THF(SMD)</sub>// $\omega$ B97XD/Def2SVP<sub>THF(PCM)</sub> energies.

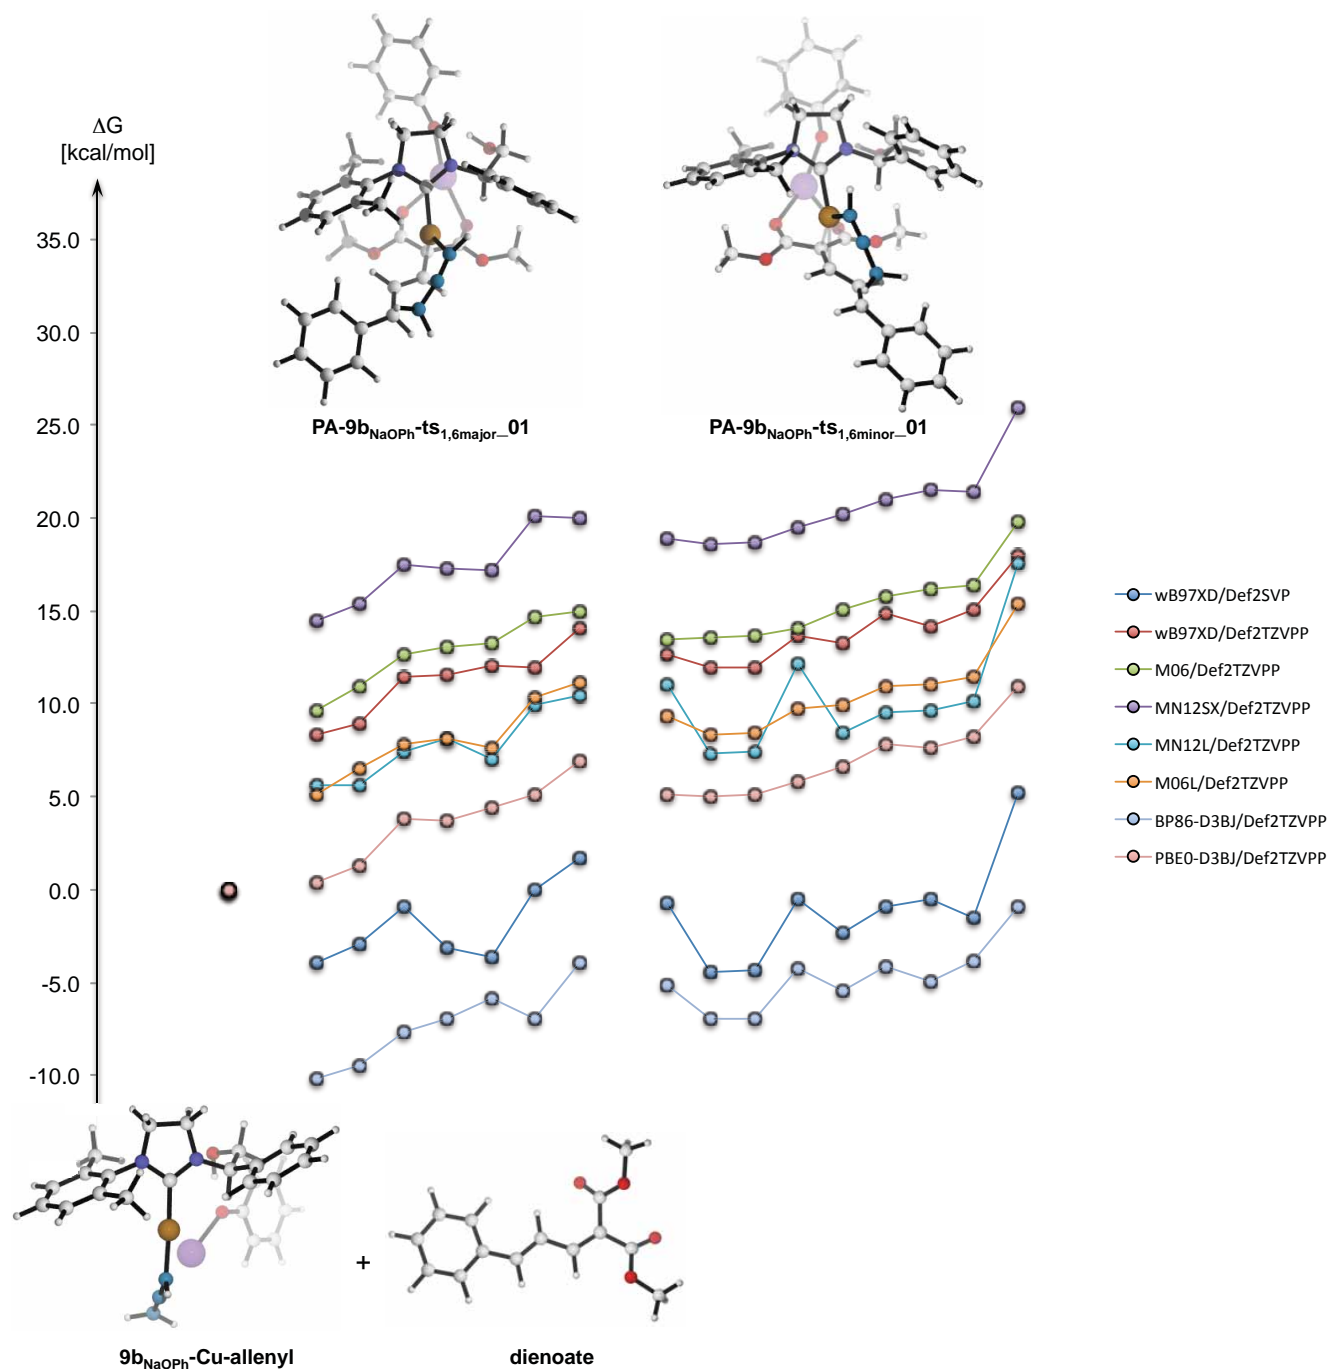

**Figure S15-2.** Conformer distribution ( $\Delta G$ , kcal/mol) for the major (**PA-9b<sub>NaOPh</sub>-ts<sub>1,6major</sub>\_01**) and minor (**PA-9b<sub>NaOPh</sub>-ts<sub>1,6minor</sub>\_01**) transition states leading 1,6-propargyl addition relative to allenyl-Cu intermediate **9b<sub>NaOPh</sub>-Cu-allenyl**; conformers are ordered from low to high energy according to the M06/Def2TZVPP<sub>THF(SMD)</sub>// $\omega$ B97XD/Def2SVP<sub>THF(PCM)</sub> energies.

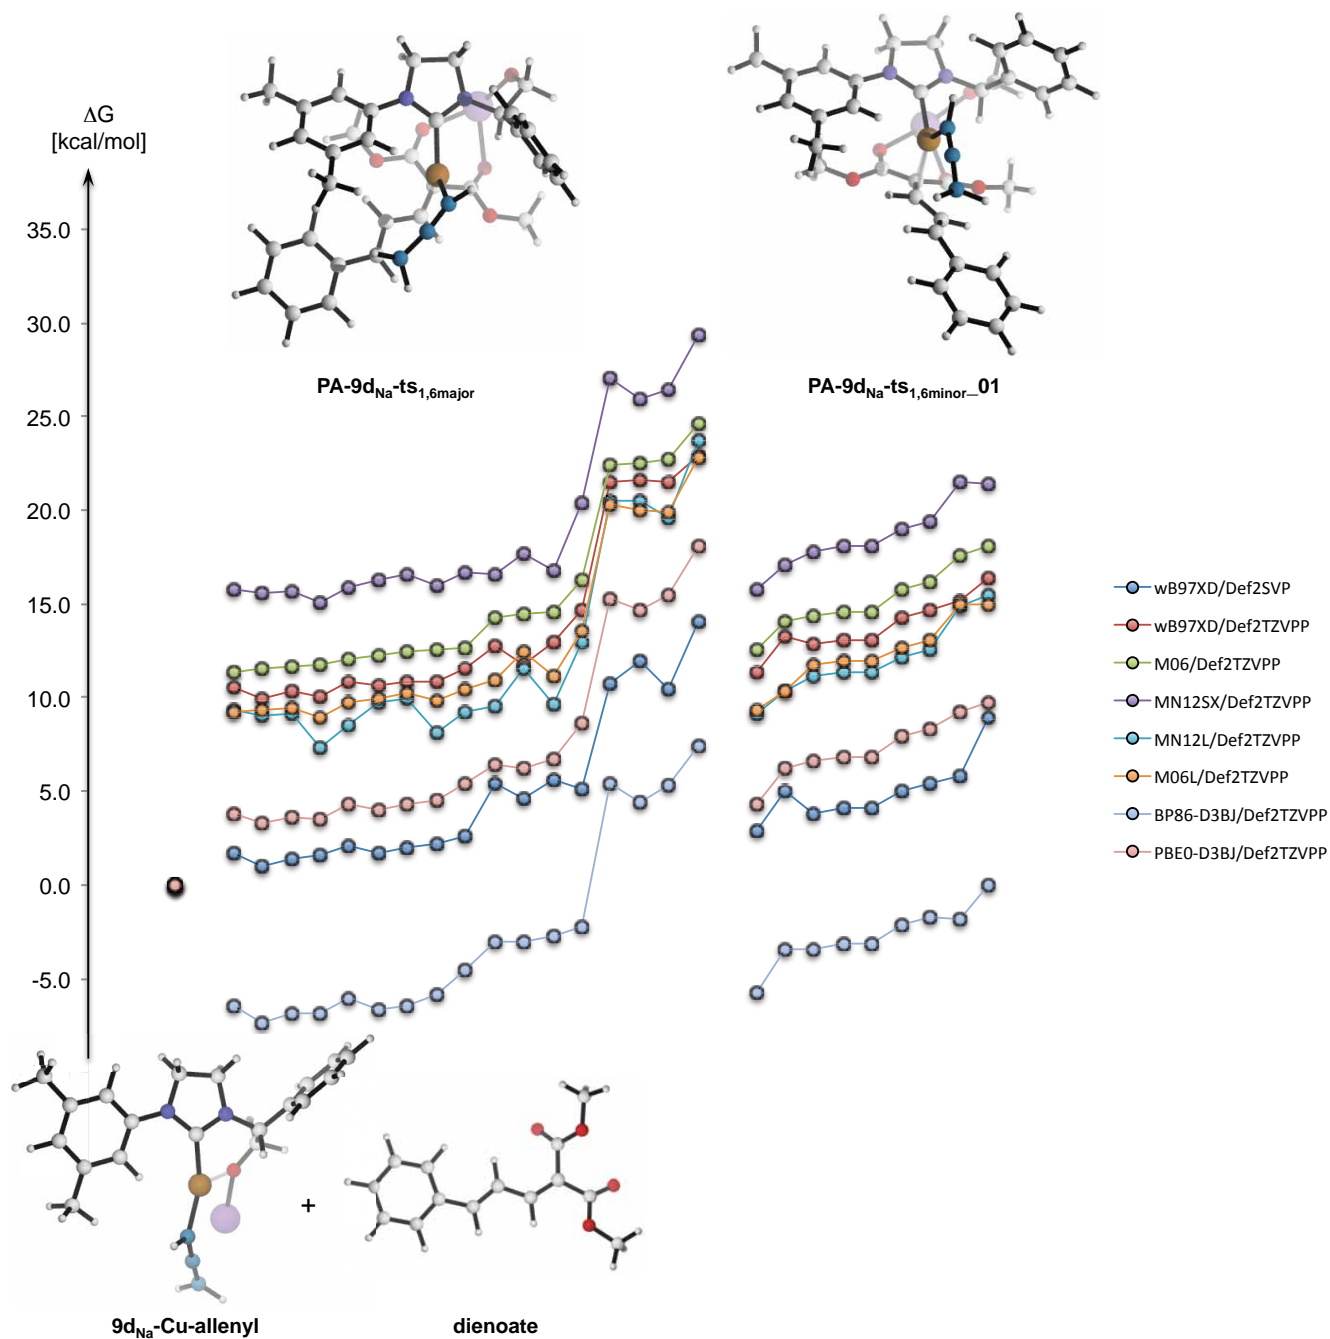

**Figure S15-3.** Conformer distribution ( $\Delta G$ , kcal/mol) for the major (**PA-9d<sub>Na</sub>-ts<sub>1,6</sub>major\_01**) and minor (**PA-9d<sub>Na</sub>-ts<sub>1,6</sub>minor\_01**) transition states leading 1,6-propargyl addition relative to allenyl-Cu intermediate **9d<sub>Na</sub>-Cu-allenyl**; conformers are ordered from low to high energy according to the M06/Def2TZVPP<sub>THF(SMD)</sub>// $\omega$ B97XD/Def2SVP<sub>THF(PCM)</sub> energies.

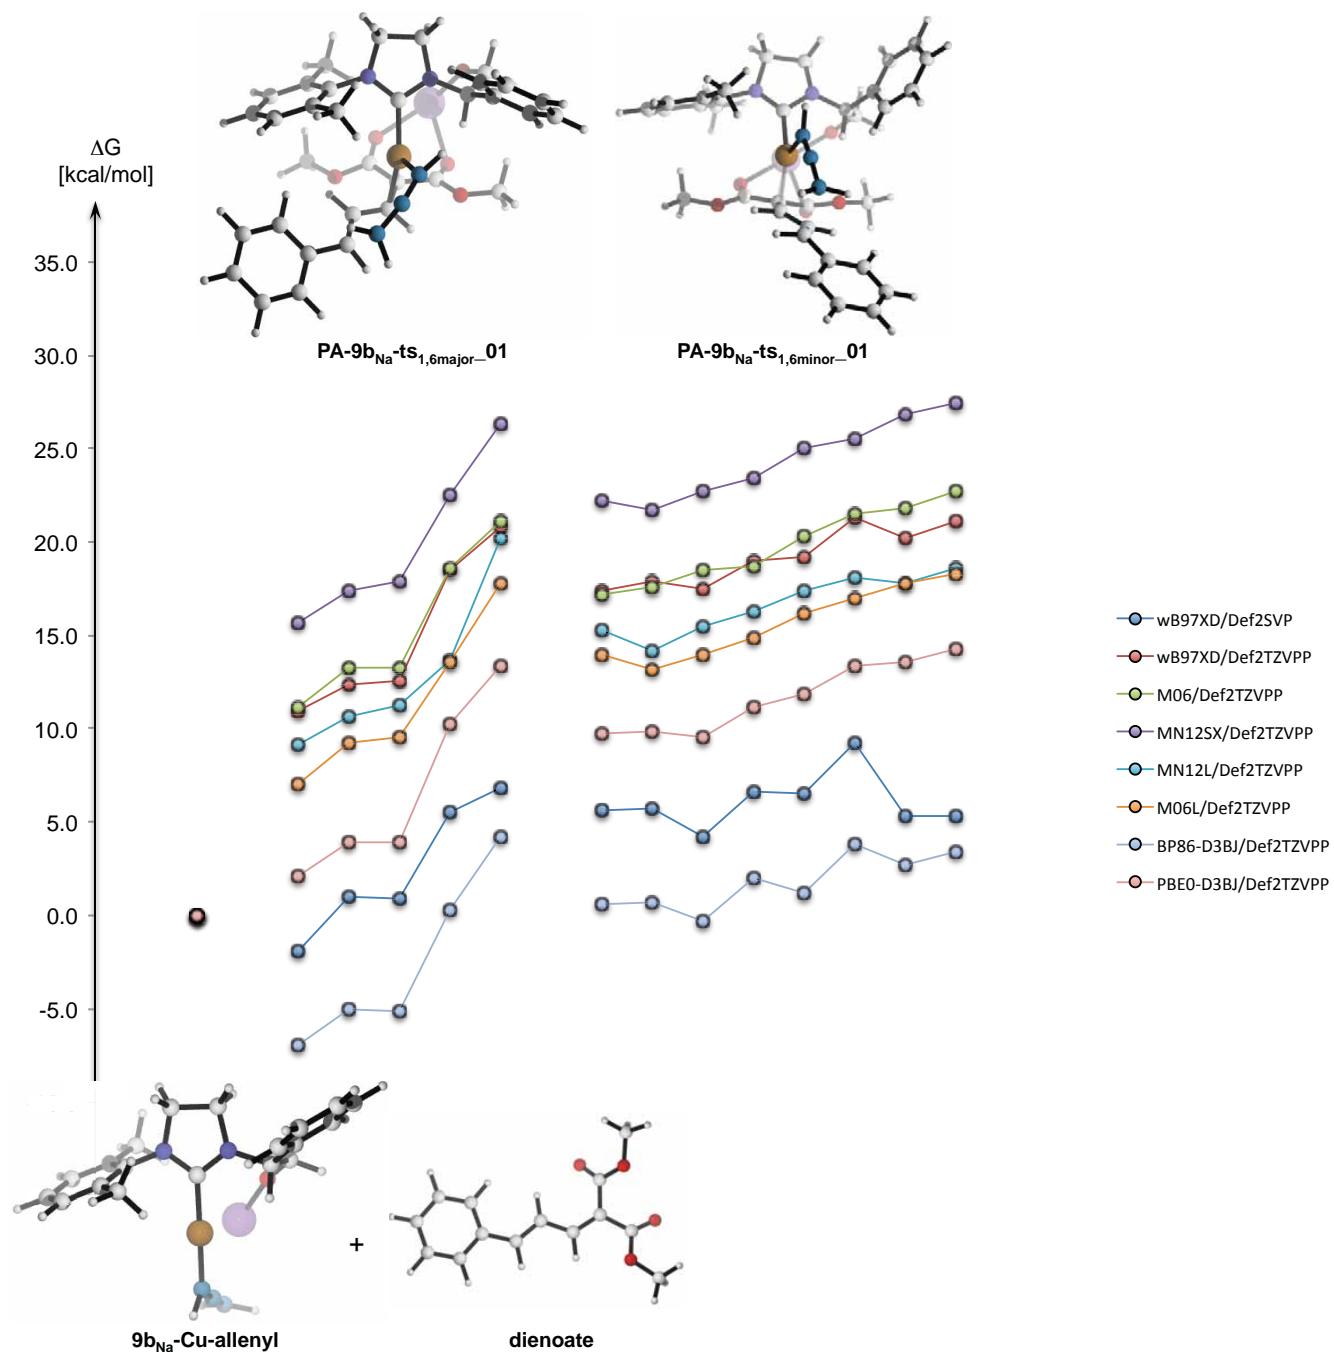

**Figure S15-4.** Conformer distribution ( $\Delta G$ , kcal/mol) for the major ( $\text{PA-9b}_{\text{Na}}\text{-ts}_{1,6\text{major}}\text{-01}$ ) and minor ( $\text{PA-9b}_{\text{Na}}\text{-ts}_{1,6\text{minor}}\text{-01}$ ) transition states leading 1,6-propargyl addition relative to allenyl-Cu intermediate  $9\text{b}_{\text{Na}}\text{-Cu-allenyl}$ ; conformers are ordered from low to high energy according to the  $\text{M06/Def2TZVPP}_{\text{THF(SMD)}}$ / $\omega\text{B97XD/Def2SVP}_{\text{THF(PCM)}}$  energies.



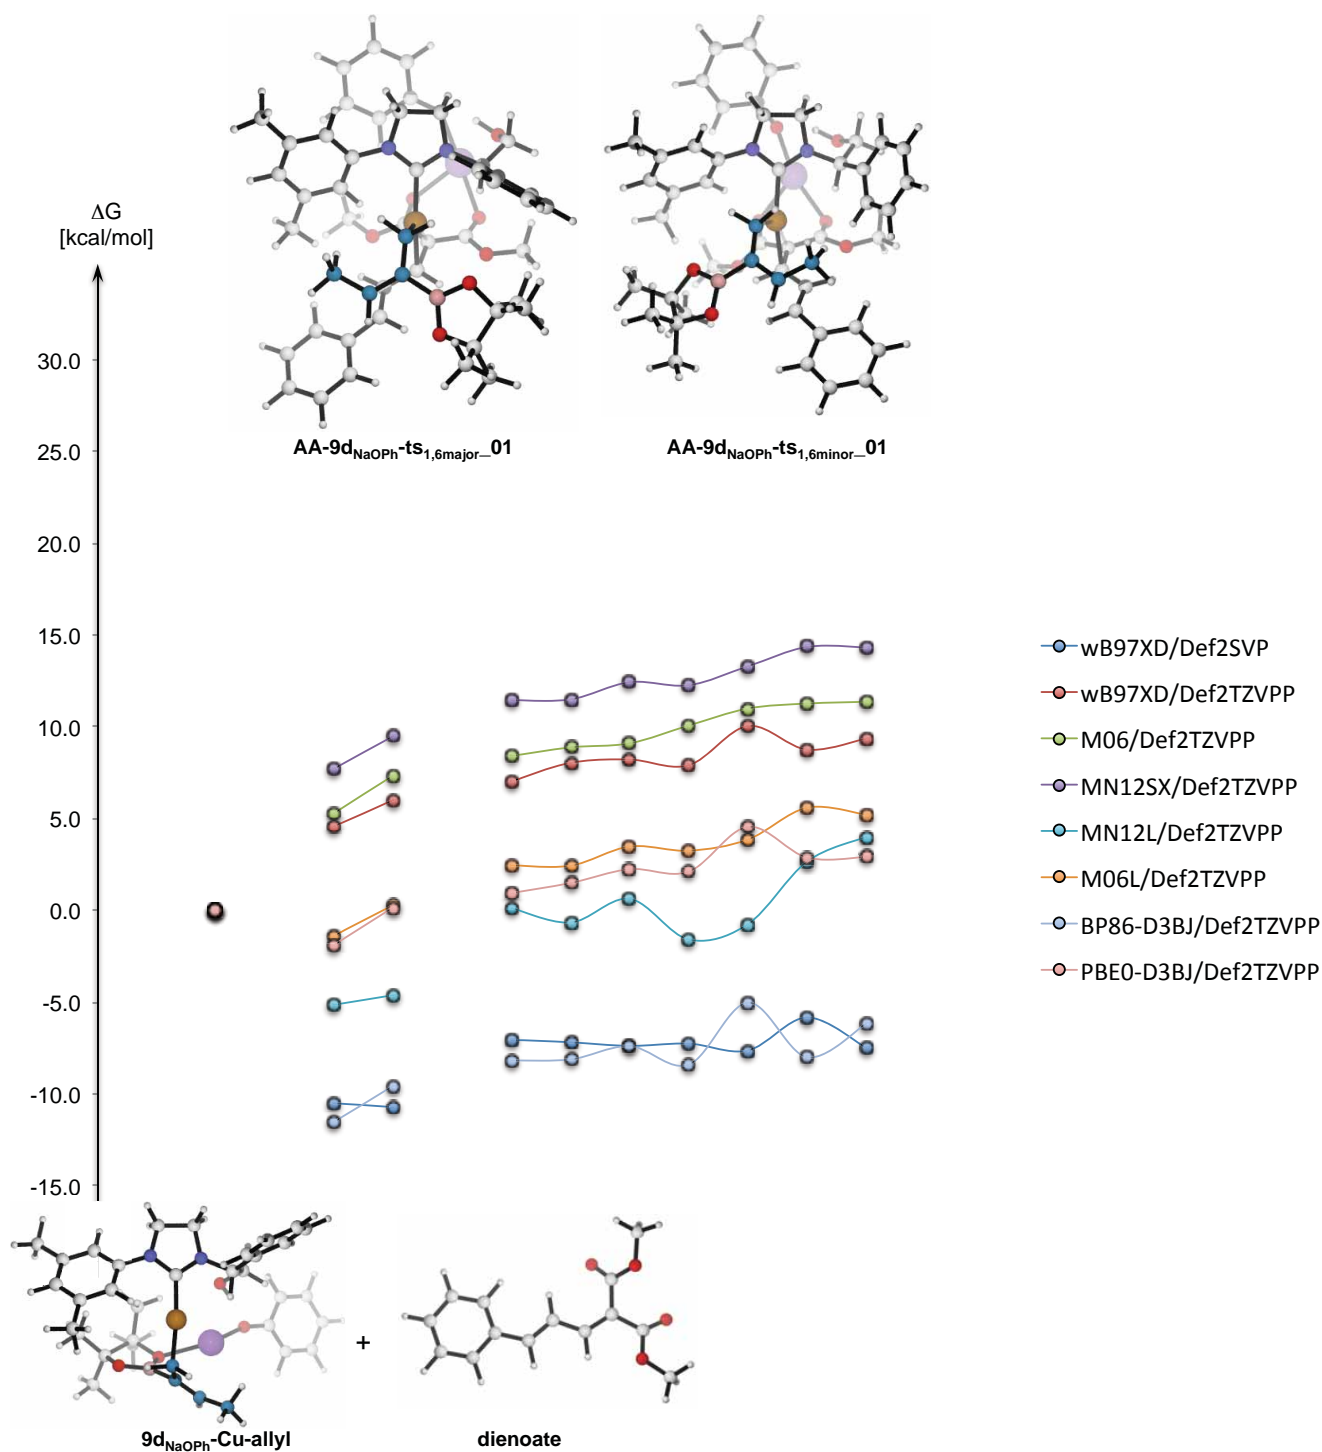

**Figure S15-5.** Conformer distribution ( $\Delta G$ , kcal/mol) for the major (**AA-9d<sub>NaOPh</sub>-ts<sub>1,6major</sub>-01**) and minor (**AA-9d<sub>NaOPh</sub>-ts<sub>1,6minor</sub>-01**) transition states leading 1,6-propargyl addition relative to allyl-Cu intermediate **9d<sub>NaOPh</sub>-Cu-allyl**; conformers are ordered from low to high energy according to the M06/Def2TZVPP<sub>THF(SMD)</sub>// $\omega$ B97XD/Def2SVP<sub>THF(PCM)</sub> energies.

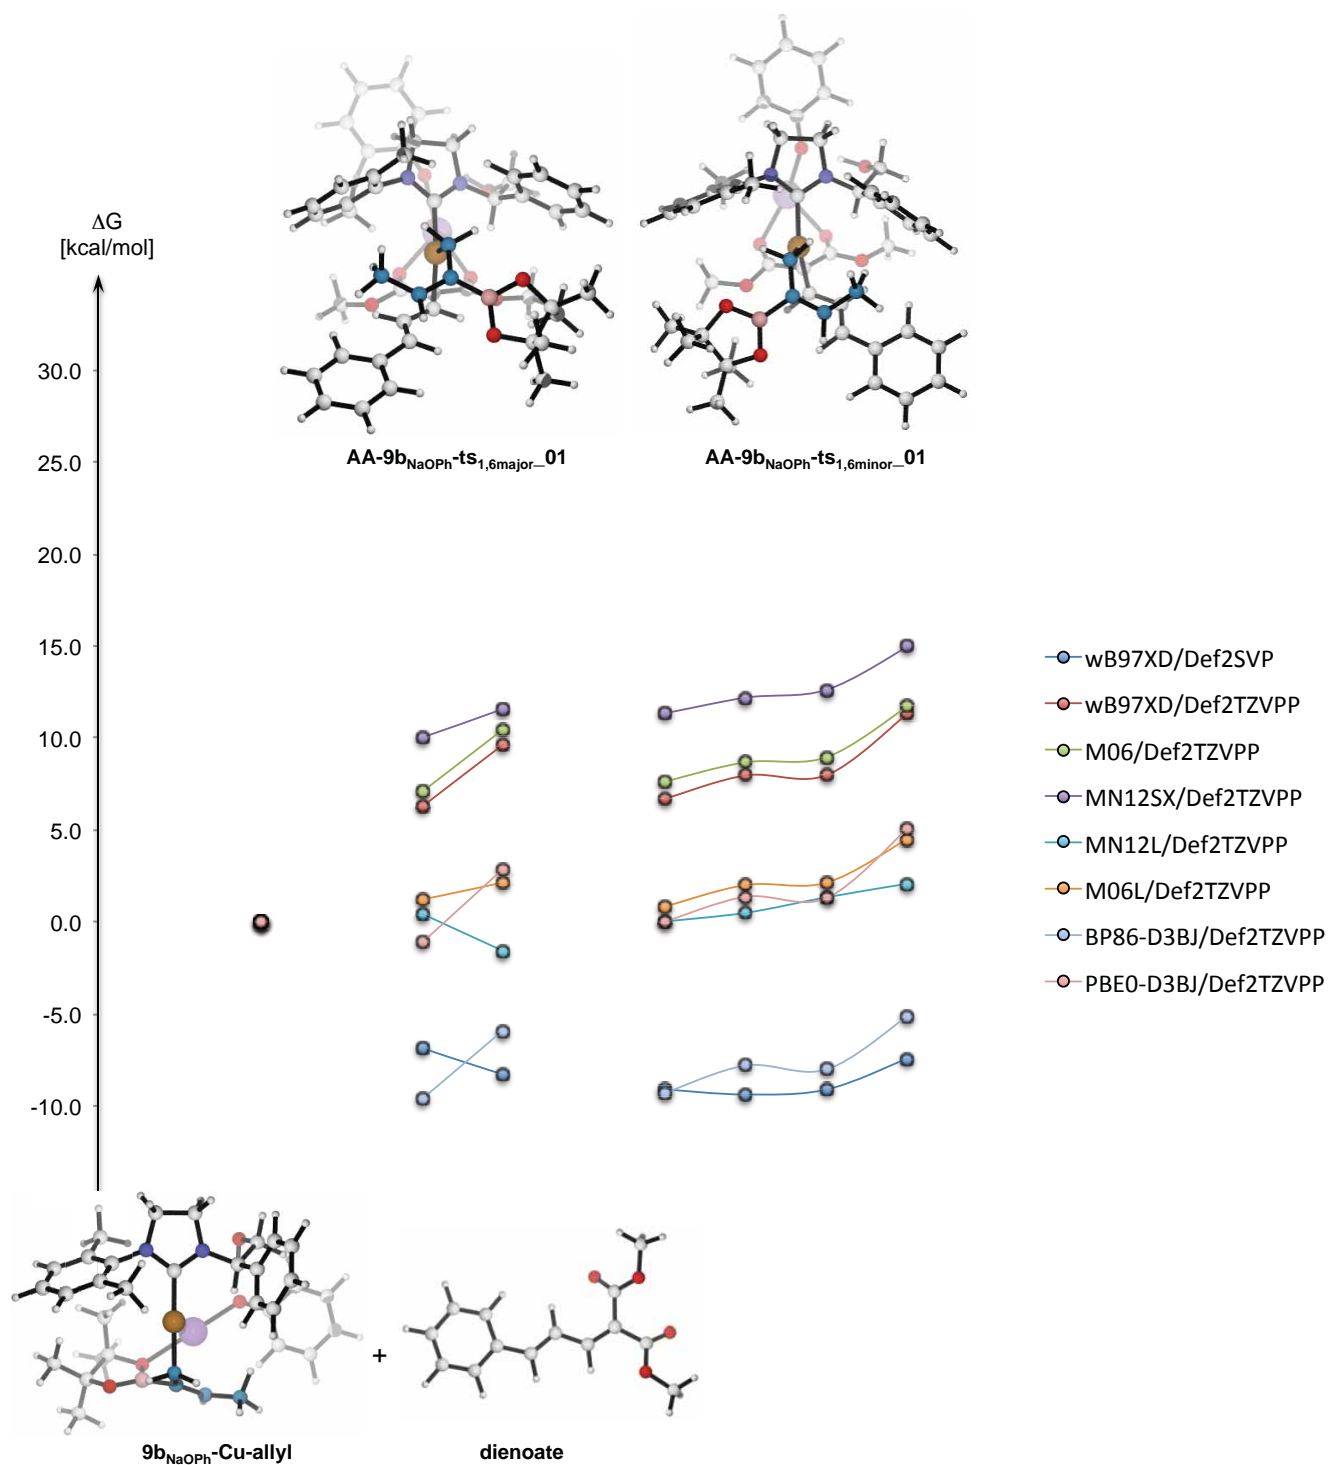

**Figure S15-6.** Conformer distribution ( $\Delta G$ , kcal/mol) for the major (**AA-9b<sub>NaOPh</sub>-ts<sub>1,6major\_01</sub>**) and minor (**AA-9b<sub>NaOPh</sub>-ts<sub>1,6minor\_01</sub>**) transition states leading 1,6-propargyl addition relative to allyl-Cu intermediate **9b<sub>NaOPh</sub>-Cu-allyl**; conformers are ordered from low to high energy according to the M06/Def2TZVPP<sub>THF(SMD)</sub>// $\omega$ B97XD/Def2SVP<sub>THF(PCM)</sub> energies.

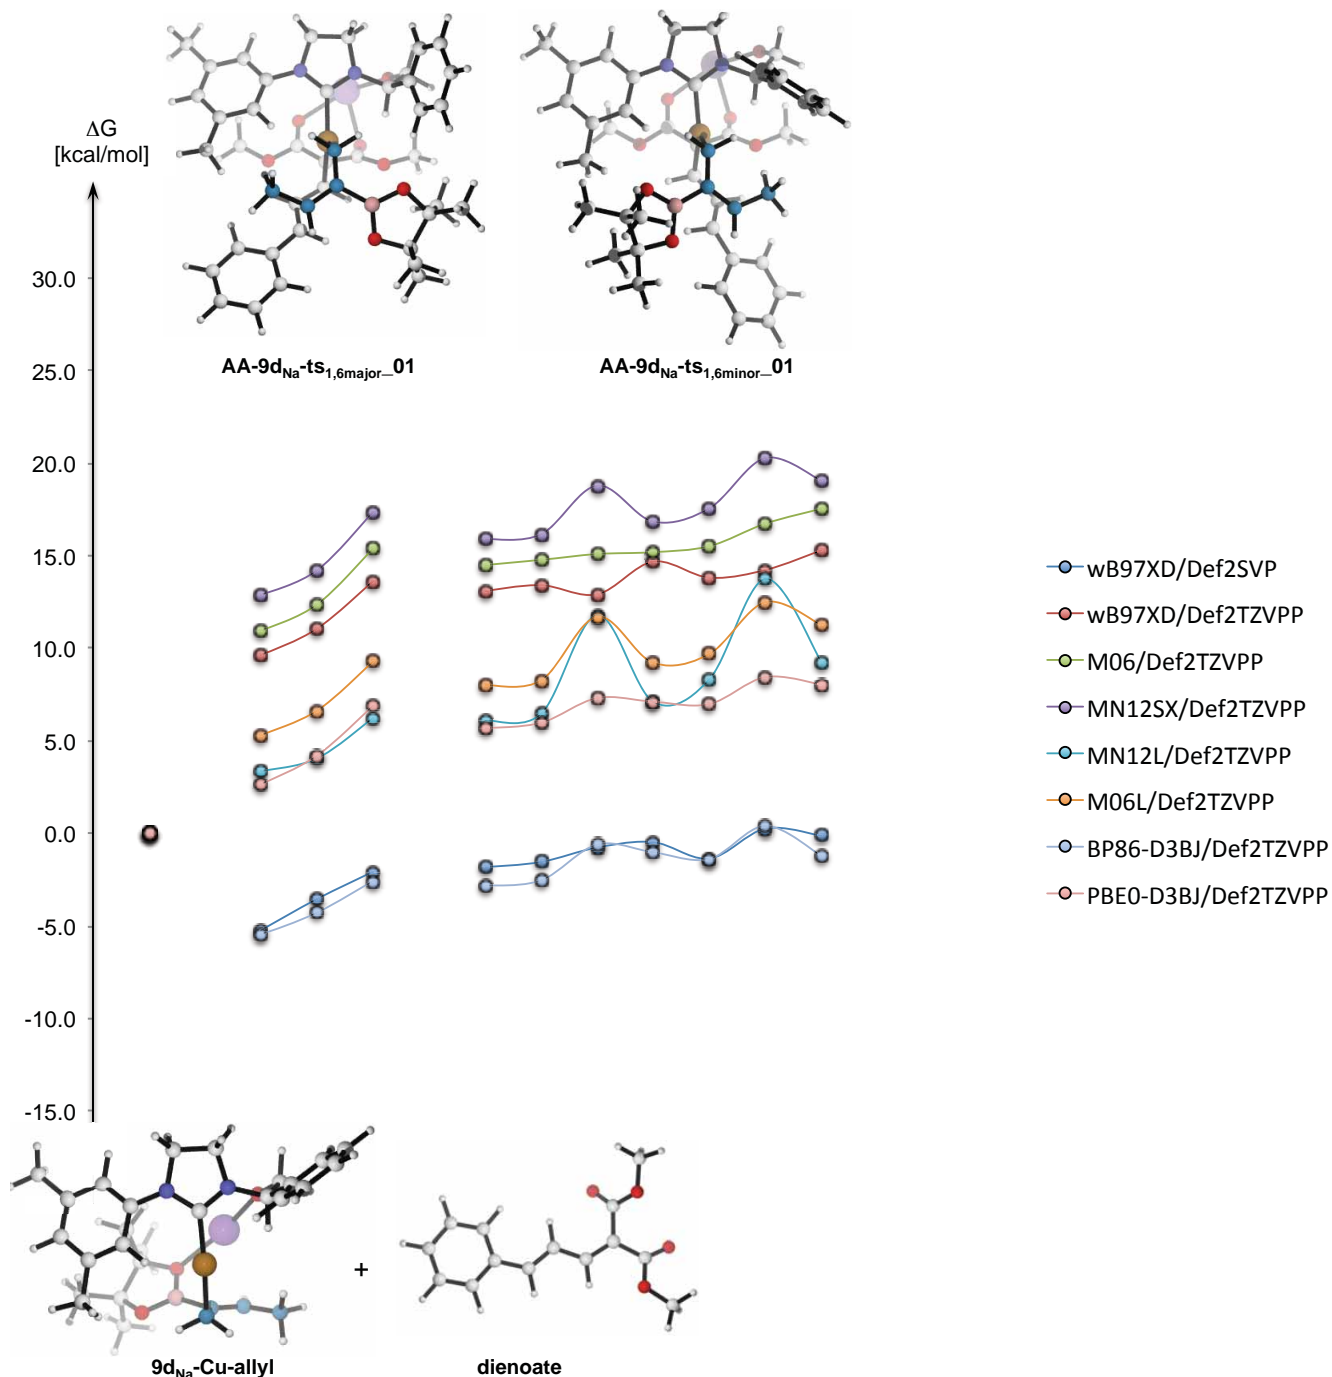

**Figure S15-7.** Conformer distribution ( $\Delta G$ , kcal/mol) for the major (**AA-9d<sub>Na</sub>-ts<sub>1,6major</sub>\_01**) and minor (**AA-9d<sub>Na</sub>-ts<sub>1,6minor</sub>\_01**) transition states leading 1,6-propargyl addition relative to allyl-Cu intermediate **9d<sub>Na</sub>-Cu-allyl**; conformers are ordered from low to high energy according to the M06/Def2TZVPP<sub>THF(SMD)</sub>// $\omega$ B97XD/Def2SVP<sub>THF(PCM)</sub> energies.

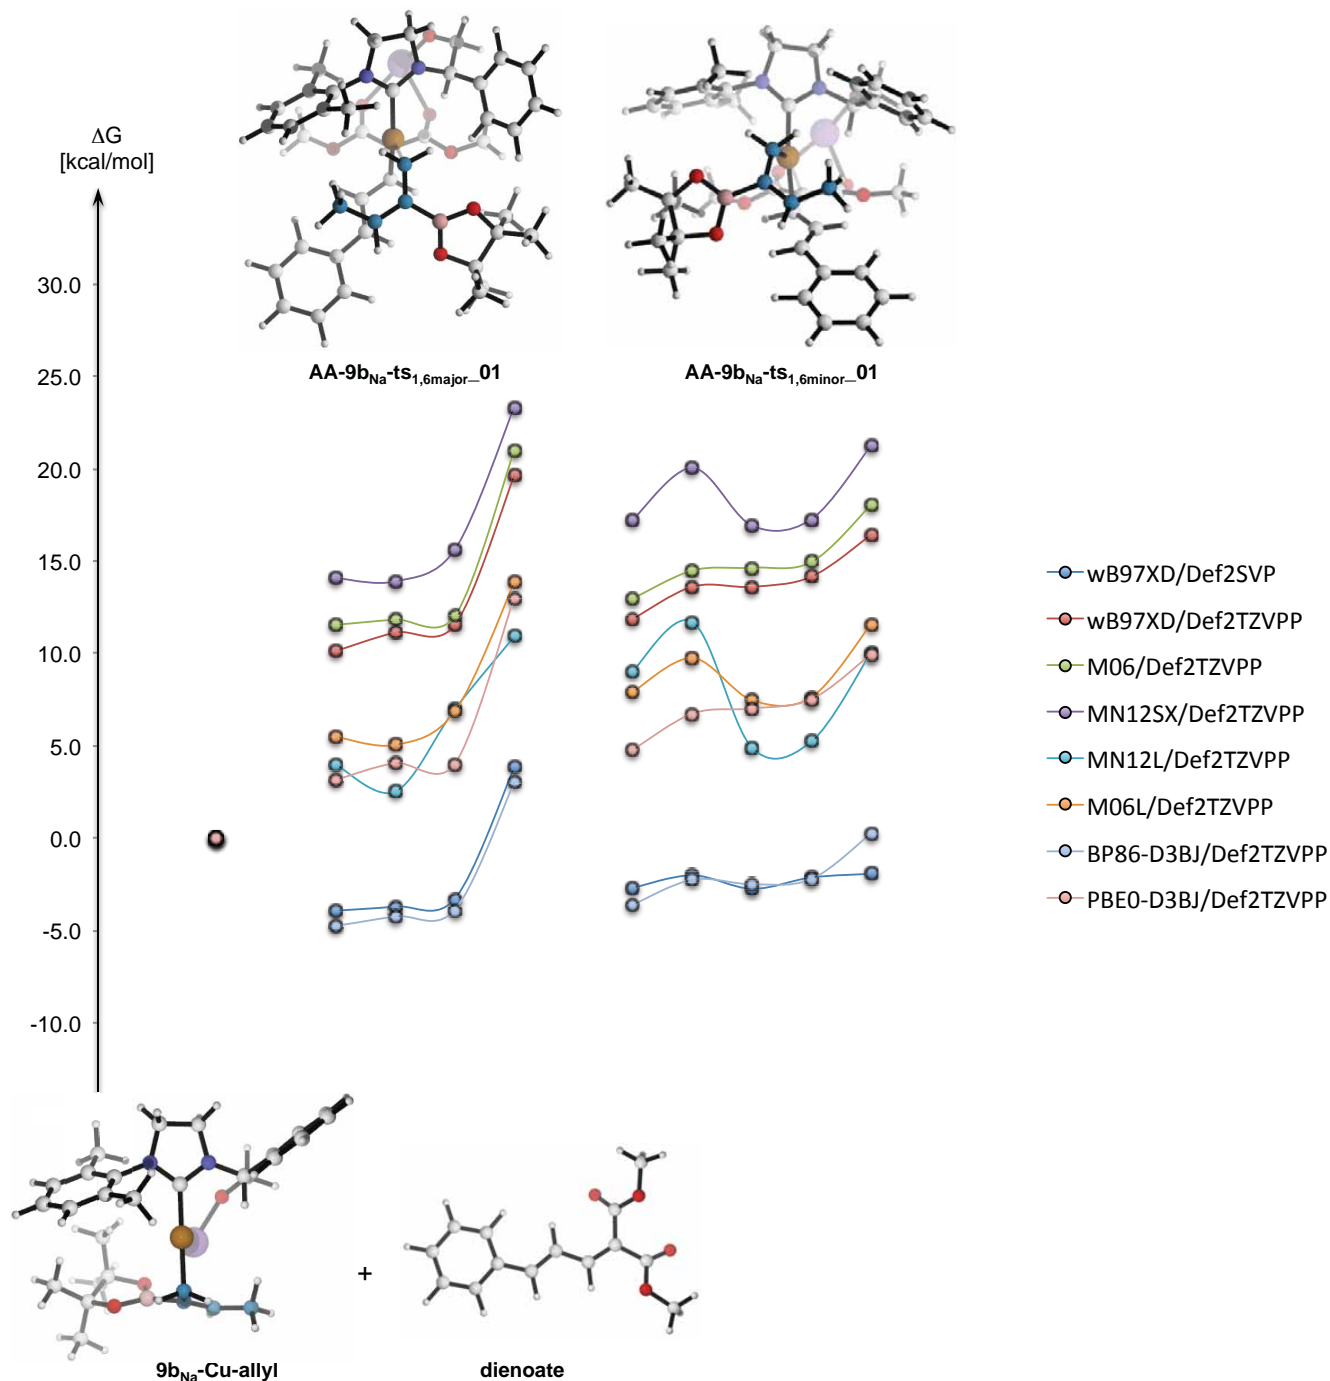

**Figure S15-8.** Conformer distribution ( $\Delta G$ , kcal/mol) for the major (**AA-9b<sub>Na</sub>-ts<sub>1,6major</sub>\_01**) and minor (**AA-9b<sub>Na</sub>-ts<sub>1,6minor</sub>\_01**) transition states leading 1,6-propargyl addition relative to allyl-Cu intermediate **9b<sub>Na</sub>-Cu-allyl**; conformers are ordered from low to high energy according to the M06/Def2TZVPP<sub>THF(SMD)</sub>// $\omega$ B97XD/Def2SVP<sub>THF(PCM)</sub> energies.

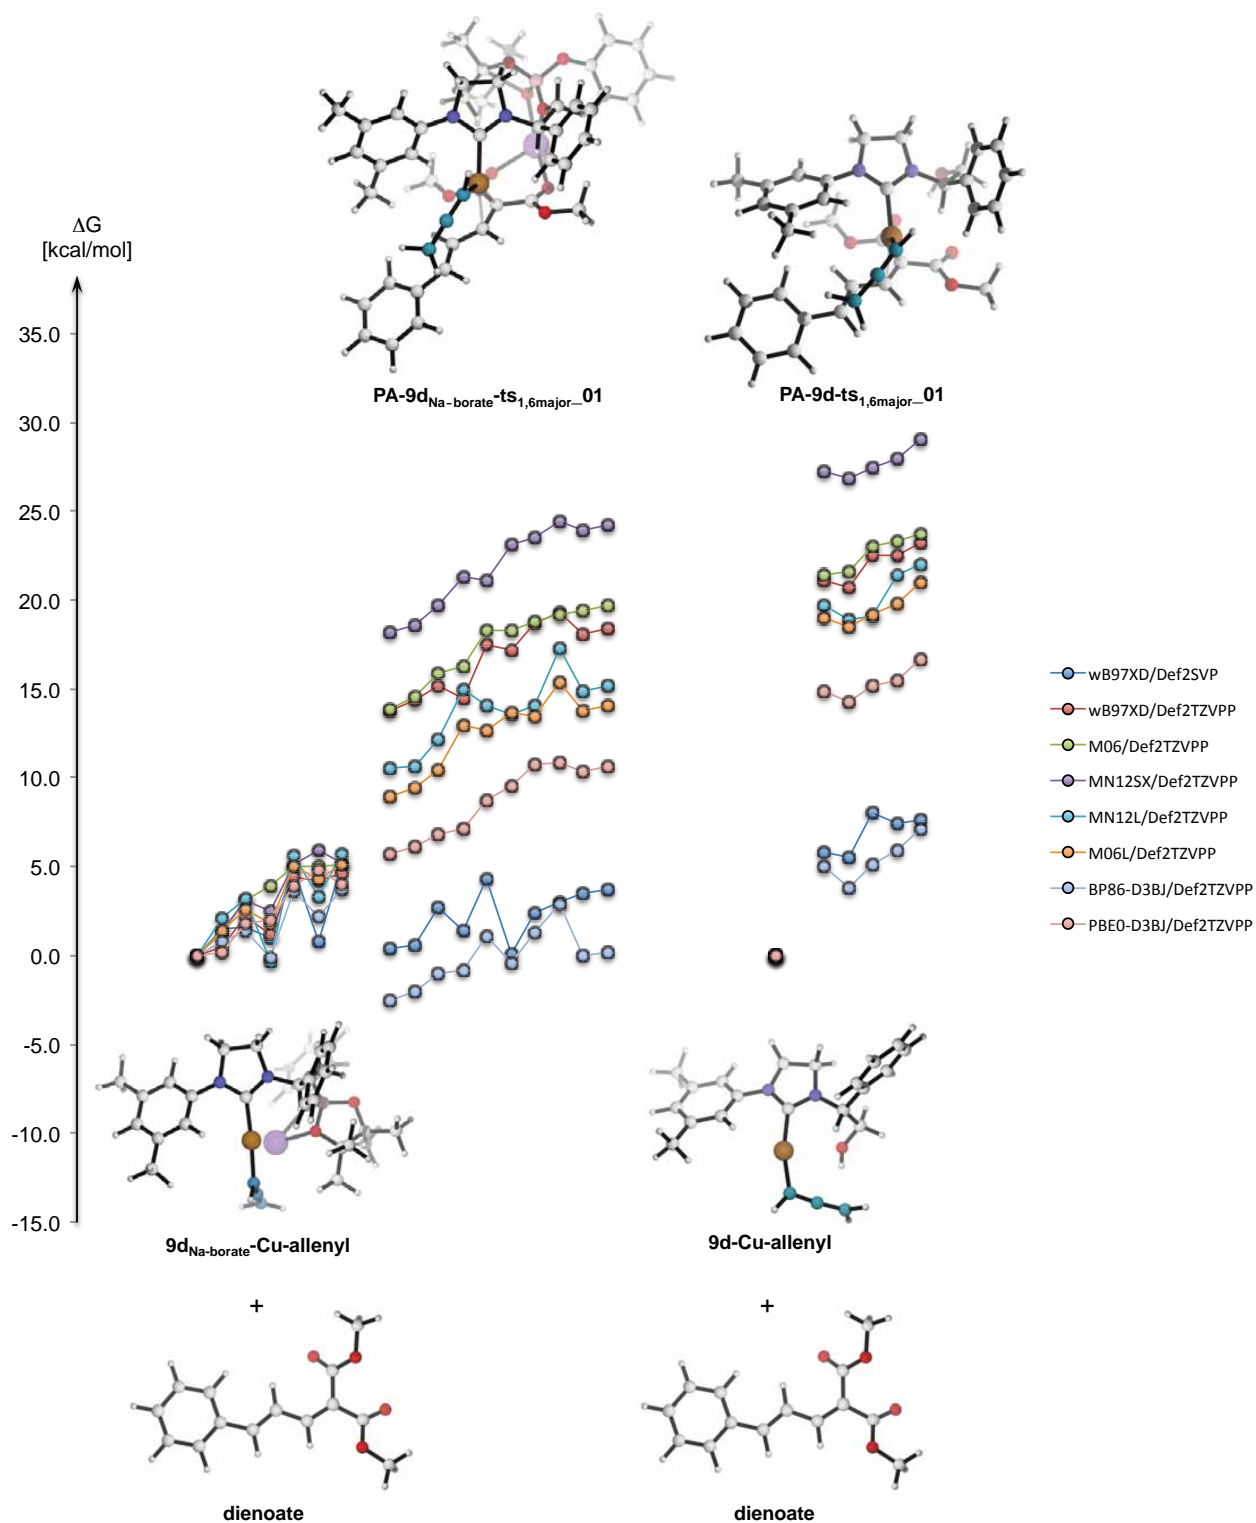

**Figure S15-9.** Conformer distribution ( $\Delta G$ , kcal/mol) for the major transition states **PA-9d<sub>Na-borate</sub>-ts<sub>1,6major</sub>\_01** and **PA-9d-ts<sub>1,6major</sub>\_01** leading 1,6-propargyl addition relative to allenyl-Cu intermediates **9d<sub>Na-borate</sub>-Cu-allenyl** and **9d-Cu-allenyl**; conformers are ordered from low to high energy according to the M06/Def2TZVPP<sub>THF(SMD)</sub>//  $\omega$ B97XD/Def2SVP<sub>THF(PCM)</sub> energies.

## 5. Energies and Gibbs Free Energies

Table S1. Optimization in Figures S1-1–S15-9 with  $\omega$ B97XD/Def2SVP<sub>thf</sub>(PCM)

| structure                           | E<br>[hartree] | E(sum)<br>[hartree] | $\Delta E$<br>[kcal/mol] | G<br>[hartree] | G(sum)<br>[hartree] | $\Delta G$<br>[kcal/mol] | $\Delta G_{\text{Corr}}$<br>[kcal/mol] | FREQ<br>[cm <sup>-1</sup> ] |
|-------------------------------------|----------------|---------------------|--------------------------|----------------|---------------------|--------------------------|----------------------------------------|-----------------------------|
| <b>Figure S1-1</b>                  |                |                     |                          |                |                     |                          |                                        |                             |
| dienoate                            | -841.92707848  |                     |                          | -841.718723    |                     |                          |                                        | 24.6                        |
| PhOH                                | -307.15051815  |                     |                          | -307.073623    |                     |                          |                                        | 229.5                       |
| NaOPh                               | -468.85364944  |                     |                          | -468.794061    |                     |                          |                                        | 15.7                        |
| tBuOH                               | -233.44101319  |                     |                          | -233.333432    |                     |                          |                                        | 210.6                       |
| NaOtBu                              | -395.11737857  |                     |                          | -395.027576    |                     |                          |                                        | 32.7                        |
| PhOBpin                             | -717.46665894  |                     |                          | -717.228760    |                     |                          |                                        | 34.0                        |
| (PhO)2BpinNa                        | -1186.36814498 |                     |                          | -1186.044662   |                     |                          |                                        | 14.0                        |
| <b>9d-Cu-allenyl</b>                | -2677.36469942 | -3914.40915647      | 0.0                      | -2677.000607   | -3913.746906        | 0.0                      | 0.0                                    | 18.9                        |
| <b>PA-9d(Na)-ts(1,6major)</b>       | -3681.01674239 | -3914.45775558      | -30.5                    | -3680.427020   | -3913.760452        | -8.5                     | 22.0                                   | -425.8                      |
| <b>9d-Cu-allenyl</b>                | -2677.36469942 | -3988.14542734      | 0.0                      | -2677.000607   | -3987.513391        | 0.0                      | 0.0                                    | 18.9                        |
| <b>PA-9d(Na)-ts(1,6major)</b>       | -3681.01674239 | -3988.16726054      | -13.7                    | -3680.427020   | -3987.500643        | 8.0                      | 21.7                                   | -425.8                      |
| <b>9d-Cu-allenyl</b>                | -2677.36469942 | -3988.14542734      | 0.0                      | -2677.000607   | -3987.513391        | 0.0                      | 0.0                                    | 18.9                        |
| <b>PA-9d(NaOPh)-ts(1,6major)</b>    | -3988.22213482 | -3988.22213482      | -48.1                    | -3987.529839   | -3987.529839        | -10.3                    | 37.8                                   | -455.1                      |
| <b>9d-Cu-allenyl</b>                | -2677.36469942 | -3519.29177790      | 0.0                      | -2677.000607   | -3518.719330        | 0.0                      | 0.0                                    | 18.9                        |
| <b>PA-9d-ts(1,6major)</b>           | -3519.31441637 | -3519.31441637      | -14.2                    | -3518.710549   | -3518.710549        | 5.5                      | 19.7                                   | -439.9                      |
| <b>9d-Cu-allenyl</b>                | -2677.36469942 | -4705.61208628      | 30.0                     | -2677.000607   | -4704.742151        | 13.7                     | -16.3                                  | 18.9                        |
| <b>9d-Cu-allenyl</b>                | -2677.36469942 | -4705.65992288      | 0.0                      | -2677.000607   | -4704.763992        | 0.0                      | 0.0                                    | 18.9                        |
| <b>PA-9d(Naborate)-ts(1,6major)</b> | -4398.56325172 | -4705.71376987      | -33.8                    | -4397.705820   | -4704.779443        | -9.7                     | 24.1                                   | -433.7                      |

**Figure S2-1**

|                                    |                |                |       |              |              |       |      |        |
|------------------------------------|----------------|----------------|-------|--------------|--------------|-------|------|--------|
| <b>PA-9d(NaOPh)-prod(1,6major)</b> | -3988.27463791 | -3988.27463791 | -57.3 | -3987.579601 | -3987.579601 | -34.3 | 23.0 | 15.8   |
| <b>PA-9d(NaOPh)-ts(1,6major)</b>   | -3988.22213482 | -3988.22213482 | -24.4 | -3987.529839 | -3987.529839 | -3.1  | 21.3 | -455.1 |
| <b>PA-9d(NaOPh)-pc(1,6major)</b>   | -3988.23491900 | -3988.23491900 | -32.4 | -3987.543634 | -3987.543634 | -11.8 | 20.6 | 15.6   |
| <b>9d(NaOPh)-Cu-allenyl</b>        | -3146.25617778 | -3988.18325626 | 0.0   | -3145.806149 | -3987.524872 | 0.0   | 0.0  | 11.9   |
| <b>9b(NaOPh)-Cu-allenyl</b>        | -3146.25183127 | -3988.17890975 | 0.0   | -3145.801041 | -3987.519764 | 0.0   | 0.0  | 14.5   |
| <b>PA-9b(NaOPh)-pc(1,6major)</b>   | -3988.22941216 | -3988.22941216 | -31.7 | -3987.537711 | -3987.537711 | -11.3 | 20.4 | 14.7   |
| <b>PA-9b(NaOPh)-ts(1,6major)</b>   | -3988.21834759 | -3988.21834759 | -24.7 | -3987.526031 | -3987.526031 | -3.9  | 20.8 | -441.8 |
| <b>PA-9b(NaOPh)-prod(1,6major)</b> | -3988.26800024 | -3988.26800024 | -55.9 | -3987.573233 | -3987.573233 | -33.6 | 22.4 | 17.1   |

|                                    |                |                |       |              |              |       |      |        |
|------------------------------------|----------------|----------------|-------|--------------|--------------|-------|------|--------|
| <b>PA-9d(NaOPh)-prod(1,6minor)</b> | -3988.26945033 | -3988.26945033 | -54.1 | -3987.576186 | -3987.576186 | -32.2 | 21.9 | 17.6   |
| <b>PA-9d(NaOPh)-ts(1,6minor)</b>   | -3988.21792967 | -3988.21792967 | -21.8 | -3987.527227 | -3987.527227 | -1.5  | 20.3 | -450.4 |
| <b>PA-9d(NaOPh)-pc(1,6minor)</b>   | -3988.23046303 | -3988.23046303 | -29.6 | -3987.540361 | -3987.540361 | -9.7  | 19.9 | 12.7   |
| <b>9d(NaOPh)-Cu-allenyl</b>        | -3146.25617778 | -3988.18325626 | 0.0   | -3145.806149 | -3987.524872 | 0.0   | 0.0  | 11.9   |
| <b>9b(NaOPh)-Cu-allenyl</b>        | -3146.25183127 | -3988.17890975 | 0.0   | -3145.801041 | -3987.519764 | 0.0   | 0.0  | 14.5   |
| <b>PA-9b(NaOPh)-pc(1,6minor)</b>   | -3988.23004284 | -3988.23004284 | -32.1 | -3987.538461 | -3987.538461 | -11.7 | 20.4 | 13.9   |
| <b>PA-9b(NaOPh)-ts(1,6minor)</b>   | -3988.21330777 | -3988.21330777 | -21.6 | -3987.520948 | -3987.520948 | -0.7  | 20.8 | -465.4 |
| <b>PA-9b(NaOPh)-prod(1,6minor)</b> | -3988.27007628 | -3988.27007628 | -57.2 | -3987.574523 | -3987.574523 | -34.4 | 22.8 | 22.1   |

Figure S3-1

|                                    |                |                |       |              |              |       |      |        |
|------------------------------------|----------------|----------------|-------|--------------|--------------|-------|------|--------|
| <b>AA-9d(NaOPh)-prod(1,6major)</b> | -4439.10399315 | -4439.10399315 | -68.1 | -4438.191242 | -4438.191242 | -42.1 | 26.0 | 15.5   |
| <b>AA-9d(NaOPh)-ts(1,6major)</b>   | -4439.05034678 | -4439.05034678 | -34.4 | -4438.140890 | -4438.140890 | -10.5 | 23.9 | -323.9 |
| <b>AA-9d(NaOPh)-pc(1,6major)</b>   | -4439.05320939 | -4439.05320939 | -36.2 | -4438.144765 | -4438.144765 | -12.9 | 23.3 | 15.8   |
| <b>9d(NaOPh)-Cu-allyl</b>          | -3597.06845638 | -4438.99553486 | 0.0   | -3596.405435 | -4438.124158 | 0.0   | 0.0  | 14.7   |
| <b>9b(NaOPh)-Cu-allyl</b>          | -3597.06856996 | -4438.99564844 | 0.0   | -3596.404446 | -4438.123169 | 0.0   | 0.0  | 15.3   |
| <b>AA-9b(NaOPh)-pc(1,6major)</b>   | -4439.04439972 | -4439.04439972 | -30.6 | -4438.140103 | -4438.140103 | -10.6 | 20.0 | 11.8   |
| <b>AA-9b(NaOPh)-ts(1,6major)</b>   | -4439.04225300 | -4439.04225300 | -29.2 | -4438.134169 | -4438.134169 | -6.9  | 22.3 | -302.4 |
| <b>AA-9b(NaOPh)-prod(1,6major)</b> | -4439.09912432 | -4439.09912432 | -64.9 | -4438.186797 | -4438.186797 | -39.9 | 25.0 | 18.3   |
| <b>AA-9d(NaOPh)-prod(1,6minor)</b> | -4439.09249888 | -4439.09249888 | -60.8 | -4438.183988 | -4438.183988 | -37.5 | 23.3 | 11.3   |
| <b>AA-9d(NaOPh)-ts(1,6minor)</b>   | -4439.04244814 | -4439.04244814 | -29.4 | -4438.135375 | -4438.135375 | -7.0  | 22.4 | -345.5 |
| <b>AA-9d(NaOPh)-pc(1,6minor)</b>   | -4439.04673704 | -4439.04673704 | -32.1 | -4438.141327 | -4438.141327 | -10.8 | 21.4 | 15.4   |
| <b>9d(NaOPh)-Cu-allyl</b>          | -3597.06845638 | -4438.99553486 | 0.0   | -3596.405435 | -4438.124158 | 0.0   | 0.0  | 14.7   |
| <b>9b(NaOPh)-Cu-allyl</b>          | -3597.06856996 | -4438.99564844 | 0.0   | -3596.404446 | -4438.123169 | 0.0   | 0.0  | 15.3   |
| <b>AA-9b(NaOPh)-pc(1,6minor)</b>   | -4439.04836588 | -4439.04836588 | -33.1 | -4438.139826 | -4438.139826 | -10.5 | 22.6 | 17.7   |
| <b>AA-9b(NaOPh)-ts(1,6minor)</b>   | -4439.04436355 | -4439.04436355 | -30.6 | -4438.137712 | -4438.137712 | -9.1  | 21.4 | -305.4 |
| <b>AA-9b(NaOPh)-prod(1,6minor)</b> | -4131.89527188 | -4131.89527188 | -62.2 | -4131.081150 | -4131.081150 | -35.8 | 26.4 | 22.8   |

Figure S4-1

|                                 |                |                |       |              |              |       |      |        |
|---------------------------------|----------------|----------------|-------|--------------|--------------|-------|------|--------|
| <b>PA-9d(Na)-prod(1,6major)</b> | -3681.07040691 | -3681.07040691 | -52.2 | -3680.475261 | -3680.475261 | -29.2 | 22.9 | 16.8   |
| <b>PA-9d(Na)-ts(1,6major)</b>   | -3681.01674239 | -3681.01674239 | -18.5 | -3680.427020 | -3680.427020 | 1.0   | 19.5 | -425.8 |
| <b>PA-9d(Na)-pc(1,6major)</b>   | -3681.03006649 | -3681.03006649 | -26.8 | -3680.439972 | -3680.439972 | -7.1  | 19.8 | 18.4   |
| <b>9d(Na)-Cu-allenyl</b>        | -2839.06020575 | -3680.98728423 | 0.0   | -2838.709953 | -3680.428676 | 0.0   | 0.0  | 14.4   |
| <b>9b(Na)-Cu-allenyl</b>        | -2839.05552233 | -3680.98260081 | 0.0   | -2838.703755 | -3680.422478 | 0.0   | 0.0  | 18.5   |
| <b>PA-9b(Na)-pc(1,6major)</b>   | -3681.02455274 | -3681.02455274 | -26.3 | -3680.435891 | -3680.435891 | -8.4  | 17.9 | 18.5   |
| <b>PA-9b(Na)-ts(1,6major)</b>   | -3681.01420703 | -3681.01420703 | -19.8 | -3680.425466 | -3680.425466 | -1.9  | 18.0 | -427.0 |
| <b>PA-9b(Na)-prod(1,6major)</b> | -3681.06325058 | -3681.06325058 | -50.6 | -3680.471031 | -3680.471031 | -30.5 | 20.1 | -13.0  |

|                                 |                |                |       |              |              |       |      |        |
|---------------------------------|----------------|----------------|-------|--------------|--------------|-------|------|--------|
| <b>PA-9d(Na)-prod(1,6minor)</b> | -3681.07164701 | -3681.07164701 | -52.9 | -3680.477648 | -3680.477648 | -30.7 | 22.2 | 12.1   |
| <b>PA-9d(Na)-ts(1,6minor)</b>   | -3681.01261478 | -3681.01261478 | -15.9 | -3680.424040 | -3680.424040 | 2.9   | 18.8 | -460.0 |
| <b>PA-9d(Na)-pc(1,6minor)</b>   | -3681.02763302 | -3681.02763302 | -25.3 | -3680.439088 | -3680.439088 | -6.5  | 18.8 | 8.2    |
| <b>9d(Na)-Cu-allenyl</b>        | -2839.06020575 | -3680.98728423 | 0.0   | -2838.709953 | -3680.428676 | 0.0   | 0.0  | 14.4   |
| <b>9b(Na)-Cu-allenyl</b>        | -2839.05552233 | -3680.98260081 | 0.0   | -2838.703755 | -3680.422478 | 0.0   | 0.0  | 18.5   |
| <b>PA-9b(Na)-pc(1,6minor)</b>   | -3681.02166482 | -3681.02166482 | -24.5 | -3680.432001 | -3680.432001 | -6.0  | 18.5 | 4.1    |
| <b>PA-9b(Na)-ts(1,6minor)</b>   | -3681.00662586 | -3681.00662586 | -15.1 | -3680.413477 | -3680.413477 | 5.6   | 20.7 | -473.7 |
| <b>PA-9b(Na)-prod(1,6minor)</b> | -3681.06430128 | -3681.06430128 | -51.3 | -3680.471969 | -3680.471969 | -31.1 | 20.2 | 21.2   |

## Figure S5-1

|                                 |                |                |       |              |              |       |      |        |
|---------------------------------|----------------|----------------|-------|--------------|--------------|-------|------|--------|
| <b>AA-9d(Na)-prod(1,6major)</b> | -4131.89053036 | -4131.89053036 | -56.6 | -4131.076083 | -4131.076083 | -30.9 | 25.7 | 23.0   |
| <b>AA-9d(Na)-ts(1,6major)</b>   | -4131.84208395 | -4131.84208395 | -26.2 | -4131.035217 | -4131.035217 | -5.2  | 21.0 | -388.7 |
| <b>AA-9d(Na)-pc(1,6major)</b>   | -4131.84678962 | -4131.84678962 | -29.2 | -4131.038237 | -4131.038237 | -7.1  | 22.0 | 18.7   |
| <b>9d(Na)-Cu-allyl</b>          | -3289.87323919 | -4131.80031767 | 0.0   | -3289.308165 | -4131.026888 | 0.0   | 0.0  | 20.5   |
| <b>9b(Na)-Cu-allyl</b>          | -3289.86902565 | -4131.79610413 | 0.0   | -3289.305371 | -4131.024094 | 0.0   | 0.0  | 17.5   |
| <b>AA-9b(Na)-pc(1,6major)</b>   | -4131.84106861 | -4131.84106861 | -28.2 | -4131.034300 | -4131.034300 | -6.4  | 21.8 | 14.0   |
| <b>AA-9b(Na)-ts(1,6major)</b>   | -4131.83854441 | -4131.83854441 | -26.6 | -4131.030376 | -4131.030376 | -3.9  | 22.7 | -314.0 |
| <b>AA-9b(Na)-prod(1,6major)</b> | -4131.89305721 | -4131.89305721 | -60.8 | -4131.080900 | -4131.080900 | -35.6 | 25.2 | 14.3   |
| <b>AA-9d(Na)-prod(1,6minor)</b> | -4131.89461386 | -4131.89461386 | -59.2 | -4131.087676 | -4131.087676 | -38.1 | 21.0 | 15.1   |
| <b>AA-9d(Na)-ts(1,6minor)</b>   | -4131.83826859 | -4131.83826859 | -23.8 | -4131.029821 | -4131.029821 | -1.8  | 22.0 | -396.3 |
| <b>AA-9d(Na)-pc(1,6minor)</b>   | -4131.84483185 | -4131.84483185 | -27.9 | -4131.038399 | -4131.038399 | -7.2  | 20.7 | -3.5   |
| <b>9d(Na)-Cu-allyl</b>          | -3289.87323919 | -4131.80031767 | 0.0   | -3289.308165 | -4131.026888 | 0.0   | 0.0  | 20.5   |
| <b>9b(Na)-Cu-allyl</b>          | -3289.86902565 | -4131.79610413 | 0.0   | -3289.305371 | -4131.024094 | 0.0   | 0.0  | 17.5   |
| <b>AA-9b(Na)-pc(1,6minor)</b>   | -4131.83917004 | -4131.83917004 | -27.0 | -4131.031466 | -4131.031466 | -4.6  | 22.4 | 12.6   |
| <b>AA-9b(Na)-ts(1,6minor)</b>   | -4131.83618193 | -4131.83618193 | -25.1 | -4131.028391 | -4131.028391 | -2.7  | 22.5 | -326.5 |
| <b>AA-9b(Na)-prod(1,6minor)</b> | -4131.89527188 | -4131.89527188 | -62.2 | -4131.081150 | -4131.081150 | -35.8 | 26.4 | 22.8   |

## Figure S6-1

|                        |                |  |              |  |       |
|------------------------|----------------|--|--------------|--|-------|
| <b>thf</b>             | -232.21317836  |  | -232.123926  |  | 60.3  |
| <b>PMe3</b>            | -460.86841611  |  | -460.785102  |  | 167.4 |
| <b>Me2NHC</b>          | -305.69353942  |  | -305.575630  |  | 35.8  |
| <b>NaOPh</b>           | -468.85364944  |  | -468.794061  |  | 15.7  |
| <b>NaOtBu</b>          | -395.11737857  |  | -395.027576  |  | 32.7  |
| <b>dienoate</b>        | -841.92707848  |  | -841.718723  |  | 24.5  |
| <b>dienoate-NaOPh</b>  | -1310.80369108 |  | -1310.516445 |  | 9.2   |
| <b>dienoate-NaOtBu</b> | -1237.06693666 |  | -1236.747187 |  | 12.6  |



|                            |                |                |       |              |              |       |       |        |
|----------------------------|----------------|----------------|-------|--------------|--------------|-------|-------|--------|
| <b>Me2NHC-Cu-allenyl</b>   | -2062.03073671 | -3067.14088837 | -15.6 | -2061.876119 | -3066.816934 | -14.7 | 0.9   | 16.2   |
| <b>PMe3-Cu-allenyl</b>     | -2217.18081038 | -3067.11608535 | 0.0   | -2217.062244 | -3066.793587 | 0.0   | 0.0   | 11.6   |
| <b>thf-Cu-allenyl</b>      | -1988.50872863 | -3067.09924135 | 10.6  | -1988.383937 | -3066.776456 | 10.7  | 0.2   | 20.9   |
| <b>PA-NaOPh-prod(1,6)</b>  | -3067.16986516 | -3067.16986516 | -33.7 | -3066.832807 | -3066.832807 | -24.6 | 9.1   | 15.9   |
| <b>PA-NaOPh-ts(1,6)</b>    | -3067.12456351 | -3067.12456351 | -5.3  | -3066.788885 | -3066.788885 | 3.0   | 8.3   | -446.9 |
| <b>PA-NaOPh-ed(1,6)</b>    | -3067.13714909 | -3067.13714909 | -13.2 | -3066.803204 | -3066.803204 | -6.0  | 7.2   | 20.6   |
| <b>NaOPh-Cu-allenyl</b>    | -2225.17069737 | -3067.09777585 | 11.5  | -2225.073825 | -3066.792548 | 0.7   | -10.8 | 21.0   |
| <b>PA-NaOPh-ed(1,4)</b>    | -3067.14378699 | -3067.14378699 | -17.4 | -3066.807977 | -3066.807977 | -9.0  | 8.4   | 20.3   |
| <b>PA-NaOPh-ts(1,4)</b>    | -3067.11795157 | -3067.11795157 | -1.2  | -3066.783244 | -3066.783244 | 6.5   | 7.7   | -466.6 |
| <b>PA-NaOPh-prod(1,4)</b>  | -3067.17831935 | -3067.17831935 | -39.1 | -3066.840874 | -3066.840874 | -29.7 | 9.4   | 16.9   |
| <b>Me2NHC-Cu-allenyl</b>   | -2062.03073671 | -2993.40413395 | -15.6 | -2061.876119 | -2993.047676 | -14.7 | 0.9   | 16.2   |
| <b>PMe3-Cu-allenyl</b>     | -2217.18081038 | -2993.37933093 | 0.0   | -2217.062244 | -2993.024329 | 0.0   | 0.0   | 11.6   |
| <b>thf-Cu-allenyl</b>      | -1988.50872863 | -2993.36248693 | 10.6  | -1988.383937 | -2993.007198 | 10.7  | 0.2   | 20.9   |
| <b>PA-NaOtBu-prod(1,6)</b> | -2993.44684250 | -2993.44684250 | -42.4 | -2993.077409 | -2993.077409 | -33.3 | 9.1   | 17.6   |
| <b>PA-NaOtBu-ts(1,6)</b>   | -2993.40265452 | -2993.40265452 | -14.6 | -2993.036695 | -2993.036695 | -7.8  | 6.9   | -461.3 |
| <b>PA-NaOtBu-ed(1,6)</b>   | -2993.41544293 | -2993.41544293 | -22.7 | -2993.051747 | -2993.051747 | -17.2 | 5.5   | 9.6    |
| <b>NaOtBu-Cu-allenyl</b>   | -2151.45184434 | -2993.37892282 | 0.3   | -2151.321355 | -2993.040078 | -9.9  | -10.1 | -9.2   |
| <b>PA-NaOtBu-ed(1,4)</b>   | -2993.41491749 | -2993.41491749 | -22.3 | -2993.053280 | -2993.053280 | -18.2 | 4.2   | 12.1   |
| <b>PA-NaOtBu-ts(1,4)</b>   | -2993.39686790 | -2993.39686790 | -11.0 | -2993.035077 | -2993.035077 | -6.7  | 4.3   | -458.7 |
| <b>PA-NaOtBu-prod(1,4)</b> | -2993.45855811 | -2993.45855811 | -49.7 | -2993.089320 | -2993.089320 | -40.8 | 8.9   | 12.7   |

## Figure S7-1

|                                 |                |                |       |              |              |       |      |        |
|---------------------------------|----------------|----------------|-------|--------------|--------------|-------|------|--------|
| <b>Me2NHC-Cu-allyl</b>          | -2512.83406354 | -3354.76114202 | 0.0   | -2512.466482 | -3354.185205 | 0.0   | 0.0  | 19.7   |
| <b>AA-Me2NHC-pc(1,6major)</b>   | -3354.79756035 | -3354.79756035 | -22.9 | -3354.192981 | -3354.192981 | -4.9  | 18.0 | 11.9   |
| <b>AA-Me2NHC-ts(1,6major)</b>   | -3354.79031886 | -3354.79031886 | -18.3 | -3354.182580 | -3354.182580 | 1.6   | 20.0 | -403.7 |
| <b>AA-Me2NHC-prod(1,6major)</b> | -3354.84618081 | -3354.84618081 | -53.4 | -3354.233098 | -3354.233098 | -30.1 | 23.3 | 21.2   |
| <b>Me2NHC-Cu-allyl</b>          | -2512.83406354 | -3354.76114202 | 0.0   | -2512.466482 | -3354.185205 | 0.0   | 0.0  | 19.7   |
| <b>AA-Me2NHC-pc(1,6minor)</b>   | -3354.79657990 | -3354.79657990 | -22.2 | -3354.189771 | -3354.189771 | -2.9  | 19.4 | 25.2   |
| <b>AA-Me2NHC-ts(1,6minor)</b>   | -3354.78177396 | -3354.78177396 | -12.9 | -3354.173882 | -3354.173882 | 7.1   | 20.1 | -454.8 |
| <b>AA-Me2NHC-prod(1,6minor)</b> | -3354.83876879 | -3354.83876879 | -48.7 | -3354.225997 | -3354.225997 | -25.6 | 23.1 | 20.3   |

## Figure S8-1

|                         |                |                |     |              |              |     |     |      |
|-------------------------|----------------|----------------|-----|--------------|--------------|-----|-----|------|
| <b>dienoate</b>         | -841.92707848  |                |     | -841.718723  |              |     |     | 24.5 |
| <b>SIMes-Cu-allenyl</b> | -2680.78923765 | -3522.71631613 | 0.0 | -2680.381618 | -3522.100341 | 0.0 | 0.0 | 16.7 |

|                             |                |                |       |              |              |       |      |        |
|-----------------------------|----------------|----------------|-------|--------------|--------------|-------|------|--------|
| <b>PA-SIMes-ed(1,6)</b>     | -3522.75056416 | -3522.75056416 | -21.5 | -3522.100784 | -3522.100784 | -0.3  | 21.2 | 18.0   |
| <b>PA-SIMes-ts(1,6)</b>     | -3522.73490214 | -3522.73490214 | -11.7 | -3522.085300 | -3522.085300 | 9.4   | 21.1 | -466.8 |
| <b>PA-SIMes-prod(1,6)</b>   | -3522.78247192 | -3522.78247192 | -41.5 | -3522.129774 | -3522.129774 | -18.5 | 23.0 | 12.7   |
| <b>PA-SIMes-ed(1,4AA)</b>   | -3522.75057238 | -3522.75057238 | -21.5 | -3522.100973 | -3522.100973 | -0.4  | 21.1 | 18.1   |
| <b>PA-SIMes-ts(1,4AA)</b>   | -3522.72443459 | -3522.72443459 | -5.1  | -3522.076183 | -3522.076183 | 15.2  | 20.3 | -348.7 |
| <b>PA-SIMes-prod(1,4AA)</b> | -3522.77095735 | -3522.77095735 | -34.3 | -3522.123860 | -3522.123860 | -14.8 | 19.5 | 13.5   |
| <b>PA-SIMes-ed(1,4)</b>     | -3522.74163171 | -3522.74163171 | -15.9 | -3522.095775 | -3522.095775 | 2.9   | 18.8 | 14.5   |
| <b>PA-SIMes-ts(1,4)</b>     | -3522.71682623 | -3522.71682623 | -0.3  | -3522.073311 | -3522.073311 | 17.0  | 17.3 | -448.7 |
| <b>PA-SIMes-prod(1,4)</b>   | -3522.75830146 | -3522.75830146 | -26.3 | -3522.108013 | -3522.108013 | -4.8  | 21.5 | 13.5   |
| <b>PPh3-Cu-allenyl</b>      | -2791.78064609 | -3633.70772457 | 0.0   | -2791.511938 | -3633.230661 | 0.0   | 0.0  | -8.5   |
| <b>PA-PPh3-ed(1,6)</b>      | -3633.73942416 | -3633.73942416 | -19.9 | -3633.234471 | -3633.234471 | -2.4  | 17.5 | 9.9    |
| <b>PA-PPh3-ts(1,6)</b>      | -3633.72277720 | -3633.72277720 | -9.4  | -3633.215506 | -3633.215506 | 9.5   | 19.0 | -480.0 |
| <b>PA-PPh3-prod(1,6)</b>    | -3633.76592730 | -3633.76592730 | -36.5 | -3633.256846 | -3633.256846 | -16.4 | 20.1 | 12.3   |
| <b>PA-PPh3-ed(1,4AA)</b>    | -3633.73998513 | -3633.73998513 | -20.2 | -3633.237076 | -3633.237076 | -4.0  | 16.2 | 13.7   |
| <b>PA-PPh3-ts(1,4AA)</b>    | -3633.71057140 | -3633.71057140 | -1.8  | -3633.208386 | -3633.208386 | 14.0  | 15.8 | -331.1 |
| <b>PA-PPh3-prod(1,4AA)</b>  | -3633.75762400 | -3633.75762400 | -31.3 | -3633.251129 | -3633.251129 | -12.8 | 18.5 | 9.1    |
| <b>PA-PPh3-ed(1,4)</b>      | -3633.73304715 | -3633.73304715 | -15.9 | -3633.231145 | -3633.231145 | -0.3  | 15.6 | 9.8    |
| <b>PA-PPh3-ts(1,4)</b>      | -3633.70950892 | -3633.70950892 | -1.1  | -3633.208630 | -3633.208630 | 13.8  | 14.9 | -430.0 |
| <b>PA-PPh3-prod(1,4)</b>    | -3633.77054729 | -3633.77054729 | -39.4 | -3633.263965 | -3633.263965 | -20.9 | 18.5 | 12.5   |

#### Figures S9-1

|                              |                |                |       |              |              |       |      |        |
|------------------------------|----------------|----------------|-------|--------------|--------------|-------|------|--------|
| <b>Me2NHC-Cu-allenyl</b>     | -2062.03073671 | -2903.95781519 | 0.0   | -2061.876119 | -2903.594842 | 0.0   | 0.0  | 16.2   |
| <b>PA-Me2NHC-ed(1,6)</b>     | -2903.98097792 | -2903.98097792 | -14.5 | -2903.589483 | -2903.589483 | 3.4   | 17.9 | 19.5   |
| <b>PA-Me2NHC-ts(1,6)</b>     | -2903.96575719 | -2903.96575719 | -5.0  | -2903.574155 | -2903.574155 | 13.0  | 18.0 | -471.6 |
| <b>PA-Me2NHC-prod(1,6)</b>   | -2904.01565681 | -2904.01565681 | -36.3 | -2903.617734 | -2903.617734 | -14.4 | 21.9 | 26.6   |
| <b>PA-Me2NHC-ed(1,4AA)</b>   | -2903.98119581 | -2903.98119581 | -14.7 | -2903.592317 | -2903.592317 | 1.6   | 16.3 | 16.1   |
| <b>PA-Me2NHC-ts(1,4AA)</b>   | -2903.95210289 | -2903.95210289 | 3.6   | -2903.564162 | -2903.564162 | 19.3  | 15.7 | -325.5 |
| <b>PA-Me2NHC-prod(1,4AA)</b> | -2904.00315785 | -2904.00315785 | -28.5 | -2903.615225 | -2903.615225 | -12.8 | 15.7 | 12.1   |
| <b>PA-Me2NHC-ed(1,4)</b>     | -2903.97461848 | -2903.97461848 | -10.5 | -2903.587739 | -2903.587739 | 4.5   | 15.0 | 13.6   |
| <b>PA-Me2NHC-ts(1,4)</b>     | -2903.94929051 | -2903.94929051 | 5.3   | -2903.560627 | -2903.560627 | 21.5  | 16.1 | -450.0 |
| <b>PA-Me2NHC-prod(1,4)</b>   | -2903.99035566 | -2903.99035566 | -20.4 | -2903.598009 | -2903.598009 | -2.0  | 18.4 | 12.4   |
| <b>PMe3-Cu-allenyl</b>       | -2217.18081038 | -3059.10788886 | 0.0   | -2217.062244 | -3058.780967 | 0.0   | 0.0  | 11.6   |
| <b>PA-PMe3-ed(1,6)</b>       | -3059.13763951 | -3059.13763951 | -18.7 | -3058.783550 | -3058.783550 | -1.6  | 17.0 | 6.6    |

|                            |                |                |       |              |              |       |      |        |
|----------------------------|----------------|----------------|-------|--------------|--------------|-------|------|--------|
| <b>PA-PMe3-ts(1,6)</b>     | -3059.12059614 | -3059.12059614 | -8.0  | -3058.764913 | -3058.764913 | 10.1  | 18.0 | -486.1 |
| <b>PA-PMe3-prod(1,6)</b>   | -3059.16803726 | -3059.16803726 | -37.7 | -3058.809791 | -3058.809791 | -18.1 | 19.7 | 11.1   |
| <b>PA-PMe3-ed(1,4AA)</b>   | -3059.13763951 | -3059.13763951 | -18.7 | -3058.783552 | -3058.783552 | -1.6  | 17.0 | 6.6    |
| <b>PA-PMe3-ts(1,4AA)</b>   | -3059.10503746 | -3059.10503746 | 1.8   | -3058.752459 | -3058.752459 | 17.9  | 16.1 | -349.3 |
| <b>PA-PMe3-prod(1,4AA)</b> | -3059.15445792 | -3059.15445792 | -29.2 | -3058.799771 | -3058.799771 | -11.8 | 17.4 | 10.1   |
| <b>PA-PMe3-ed(1,4)</b>     | -3059.13081436 | -3059.13081436 | -14.4 | -3058.778278 | -3058.778278 | 1.7   | 16.1 | 15.0   |
| <b>PA-PMe3-ts(1,4)</b>     | -3059.10625840 | -3059.10625840 | 1.0   | -3058.755276 | -3058.755276 | 16.1  | 15.1 | -463.1 |
| <b>PA-PMe3-prod(1,4)</b>   | -3059.16938303 | -3059.16938303 | -38.6 | -3058.809679 | -3058.809679 | -18.0 | 20.6 | 24.5   |

Figure S10-1

|                                       |                |                |       |              |              |       |      |        |
|---------------------------------------|----------------|----------------|-------|--------------|--------------|-------|------|--------|
| <b>dienoate</b>                       | -841.92707848  |                |       | -841.718723  |              |       |      | 24.5   |
| <b>dienoate-Naborate</b>              | -1486.89608401 |                |       | -1486.563543 |              |       |      | 15.5   |
| <b>SIMes-Cu-allenyl</b>               | -2680.78923765 | -4167.68532166 | 0.0   | -2680.381618 | -4166.945161 | 0.0   | 0.0  | 16.7   |
| <b>PA-SIMes(Naborate)-ed(1,6)</b>     | -4167.72984142 | -4167.72984142 | -27.9 | -4166.953118 | -4166.953118 | -5.0  | 22.9 | 15.7   |
| <b>PA-SIMes(Naborate)-ts(1,6)</b>     | -4167.72041851 | -4167.72041851 | -22.0 | -4166.944949 | -4166.944949 | 0.1   | 22.2 | -419.8 |
| <b>PA-SIMes(Naborate)-prod(1,6)</b>   | -4167.77319994 | -4167.77319994 | -55.1 | -4166.995501 | -4166.995501 | -31.6 | 23.6 | 11.5   |
| <b>PA-SIMes(Naborate)-ed(1,4AA)</b>   | -4167.73112443 | -4167.73112443 | -28.7 | -4166.956197 | -4166.956197 | -6.9  | 21.8 | 14.6   |
| <b>PA-SIMes(Naborate)-ts(1,4AA)</b>   | -4167.71268692 | -4167.71268692 | -17.2 | -4166.939666 | -4166.939666 | 3.4   | 20.6 | -302.0 |
| <b>PA-SIMes(Naborate)-prod(1,4AA)</b> | -4167.75978235 | -4167.75978235 | -46.7 | -4166.984388 | -4166.984388 | -24.6 | 22.1 | 13.9   |
| <b>PA-SIMes(Naborate)-ed(1,4)</b>     | -4167.72594722 | -4167.72594722 | -25.5 | -4166.951422 | -4166.951422 | -3.9  | 21.6 | -12.7  |
| <b>PA-SIMes(Naborate)-ts(1,4)</b>     | -4167.70362749 | -4167.70362749 | -11.5 | -4166.930624 | -4166.930624 | 9.1   | 20.6 | -447.0 |
| <b>PA-SIMes(Naborate)-prod(1,4)</b>   | -4167.77405497 | -4167.77405497 | -55.7 | -4166.996784 | -4166.996784 | -32.4 | 23.3 | 15.5   |
| <b>dienoate</b>                       | -841.92707848  |                |       | -841.718723  |              |       |      | 24.5   |
| <b>dienoate-Naborate</b>              | -1486.89608401 |                |       | -1486.563543 |              |       |      | 15.5   |
| <b>PPh3-Cu-allenyl</b>                | -2791.78064609 | -4278.67673010 | 0.0   | -2791.511938 | -4278.075481 | 0.0   | 0.0  | -8.5   |
| <b>PA-PPh3(Naborate)-ed(1,6)</b>      | -4278.71914908 | -4278.71914908 | -26.6 | -4278.086340 | -4278.086340 | -6.8  | 19.8 | 17.8   |
| <b>PA-PPh3(Naborate)-ts(1,6)</b>      | -4278.70801041 | -4278.70801041 | -19.6 | -4278.075731 | -4278.075731 | -0.2  | 19.5 | -446.5 |
| <b>PA-PPh3(Naborate)-prod(1,6)</b>    | -4278.76045462 | -4278.76045462 | -52.5 | -4278.123447 | -4278.123447 | -30.1 | 22.4 | 14.9   |
| <b>PA-PPh3(Naborate)-ed(1,4AA)</b>    | -4278.72067874 | -4278.72067874 | -27.6 | -4278.091963 | -4278.091963 | -10.3 | 17.2 | 13.6   |
| <b>PA-PPh3(Naborate)-ts(1,4AA)</b>    | -4278.69171118 | -4278.69171118 | -9.4  | -4278.066438 | -4278.066438 | 5.7   | 15.1 | -303.5 |
| <b>PA-PPh3(Naborate)-prod(1,4AA)</b>  | -4278.74542342 | -4278.74542342 | -43.1 | -4278.117823 | -4278.117823 | -26.6 | 16.5 | 12.0   |
| <b>PA-PPh3(Naborate)-ed(1,4)</b>      | -4278.71589517 | -4278.71589517 | -24.6 | -4278.088006 | -4278.088006 | -7.9  | 16.7 | 9.2    |
| <b>PA-PPh3(Naborate)-ts(1,4)</b>      | -4278.69317096 | -4278.69317096 | -10.3 | -4278.063095 | -4278.063095 | 7.8   | 18.1 | -422.9 |
| <b>PA-PPh3(Naborate)-prod(1,4)</b>    | -4278.76423088 | -4278.76423088 | -54.9 | -4278.125760 | -4278.125760 | -31.6 | 23.4 | 15.3   |

Figure S11-1

|                                 |                |                |       |              |              |       |      |        |  |
|---------------------------------|----------------|----------------|-------|--------------|--------------|-------|------|--------|--|
| <b>dienoate</b>                 | -841.92707848  |                |       | -841.718723  |              |       |      | 24.5   |  |
| <b>PA-9d(Na)-prod(1,6major)</b> | -3681.07040691 | -3681.07040691 | -52.2 | -3680.475261 | -3680.475261 | -29.2 | 22.9 | 16.8   |  |
| <b>PA-9d(Na)-ts(1,6major)</b>   | -3681.01674239 | -3681.01674239 | -18.5 | -3680.427020 | -3680.427020 | 1.0   | 19.5 | -425.8 |  |
| <b>PA-9d(Na)-pc(1,6major)</b>   | -3681.03006649 | -3681.03006649 | -26.8 | -3680.439972 | -3680.439972 | -7.1  | 19.8 | 18.4   |  |
| <b>9d(Na)-Cu-allenyl</b>        | -2839.06020575 | -3680.98728423 | 0.0   | -2838.709953 | -3680.428676 | 0.0   | 0.0  | 14.4   |  |
| <b>PA-9d(Na)-pc(1,4AA)</b>      | -3681.02869646 | -3681.02869646 | -26.0 | -3680.440268 | -3680.440268 | -7.3  | 18.7 | 15.3   |  |
| <b>PA-9d(Na)-ts(1,4AA)</b>      | -3681.00195136 | -3681.00195136 | -9.2  | -3680.415510 | -3680.415510 | 8.3   | 17.5 | -312.4 |  |
| <b>PA-9d(Na)-prod(1,4AA)</b>    | -3681.06975124 | -3681.06975124 | -51.7 | -3680.482101 | -3680.482101 | -33.5 | 18.2 | 13.2   |  |

Figure S12-1

|                                   |                |                |       |              |              |       |       |        |  |
|-----------------------------------|----------------|----------------|-------|--------------|--------------|-------|-------|--------|--|
| <b>NaOtBu</b>                     | -395.11737857  |                |       | -395.027576  |              |       |       | 32.7   |  |
| <b>dienoate</b>                   | -841.92707848  |                |       | -841.718723  |              |       |       | 24.6   |  |
| <b>PA-SIMes(NaOtBu)-prod(1,4)</b> | -3917.95611486 | -2680.91165781 | -50.4 | -3917.190802 | -2680.444503 | -31.4 | 19.0  | 10.4   |  |
| <b>PA-SIMes(NaOtBu)-ts(1,4)</b>   | -3917.87960041 | -2680.83514336 | -2.4  | -3917.115941 | -2680.369642 | 15.6  | 18.0  | -420.3 |  |
| <b>PA-SIMes(NaOtBu)-ed(1,4)</b>   | -3917.90470258 | -2680.86024553 | -18.1 | -3917.141520 | -2680.395221 | -0.5  | 17.7  | 9.6    |  |
| <b>SIMes-Cu-allenyl</b>           | -2680.78923765 | -2680.78923765 | 26.4  | -2680.381618 | -2680.381618 | 8.1   | -18.4 | 16.7   |  |
| <b>SIMes-Cu(NaOtBu)-allenyl</b>   | -3075.94872495 | -2680.83134638 | 0.0   | -3075.422058 | -2680.394482 | 0.0   | 0.0   | 27.3   |  |
| <b>PA-SIMes(NaOtBu)-ed(1,6)</b>   | -3917.90118513 | -2680.85672808 | -15.9 | -3917.136643 | -2680.390344 | 2.6   | 18.5  | 13.4   |  |
| <b>PA-SIMes(NaOtBu)-ts(1,6)</b>   | -3917.89152237 | -2680.84706532 | -9.9  | -3917.128322 | -2680.382023 | 7.8   | 17.7  | -424.8 |  |
| <b>PA-SIMes(NaOtBu)-prod(1,6)</b> | -3917.94472680 | -2680.90026975 | -43.3 | -3917.180195 | -2680.433896 | -24.7 | 18.5  | 14.3   |  |
| <b>PA-PPh3(NaOtBu)-prod(1,4)</b>  | -4028.96421775 | -2791.91976070 | -55.0 | -4028.335477 | -2791.589178 | -31.9 | 23.1  | 14.4   |  |
| <b>PA-PPh3(NaOtBu)-ts(1,4)</b>    | -4028.89777635 | -2791.85331930 | -13.3 | -4028.276246 | -2791.529947 | 5.3   | 18.6  | -353.7 |  |
| <b>PA-PPh3(NaOtBu)-ed(1,4)</b>    | -4028.91570865 | -2791.87125160 | -24.6 | -4028.292273 | -2791.545974 | -4.8  | 19.8  | 15.8   |  |
| <b>PPh3-Cu-allenyl</b>            | -2791.78064609 | -2791.78064609 | 32.3  | -2791.511938 | -2791.511938 | 16.6  | -15.7 | -8.5   |  |
| <b>PPh3-Cu(NaOtBu)-allenyl</b>    | -3186.94946047 | -2791.83208190 | 0.0   | -3186.565929 | -2791.538353 | 0.0   | 0.0   | 17.5   |  |
| <b>PA-PPh3(NaOtBu)-ed(1,6)</b>    | -4028.88980074 | -2791.84534369 | -8.3  | -4028.269434 | -2791.523135 | 9.5   | 17.9  | 13.3   |  |
| <b>PA-PPh3(NaOtBu)-ts(1,6)</b>    | -4028.87865129 | -2791.83419424 | -1.3  | -4028.255865 | -2791.509566 | 18.1  | 19.4  | -449.1 |  |
| <b>PA-PPh3(NaOtBu)-prod(1,6)</b>  | -4028.93073582 | -2791.88627877 | -34.0 | -4028.305792 | -2791.559493 | -13.3 | 20.7  | 14.5   |  |

Figure S13-1

|                                  |                |                |       |              |              |       |       |        |
|----------------------------------|----------------|----------------|-------|--------------|--------------|-------|-------|--------|
| <b>NaOMe</b>                     | -277.27660539  |                |       | -277.264690  |              |       |       | 96.5   |
| <b>dienoate</b>                  | -841.92707848  |                |       | -841.718723  |              |       |       | 24.6   |
| <b>PA-SIMes(NaOMe)-prod(1,4)</b> | -3800.11624361 | -2680.91255974 | -53.8 | -3799.429523 | -2680.446110 | -32.4 | 21.4  | 12.2   |
| <b>PA-SIMes(NaOMe)-ts(1,4)</b>   | -3800.03623090 | -2680.83254703 | -3.6  | -3799.354189 | -2680.370776 | 14.8  | 18.5  | -400.1 |
| <b>PA-SIMes(NaOMe)-ed(1,4)</b>   | -3800.05869359 | -2680.85500972 | -17.7 | -3799.376352 | -2680.392939 | 0.9   | 18.7  | 13.8   |
| <b>SIMes-Cu-allenyl</b>          | -2680.78923765 | -2680.78923765 | 23.5  | -2680.381618 | -2680.381618 | 8.0   | -15.5 | 16.7   |
| <b>SIMes-Cu(NaOMe)-allenyl</b>   | -2958.10335257 | -2680.82674718 | 0.0   | -2957.659100 | -2680.394410 | 0.0   | 0.0   | 26.9   |
| <b>PA-SIMes(NaOMe)-ed(1,6)</b>   | -3800.05935298 | -2680.85566911 | -18.1 | -3799.377728 | -2680.394315 | 0.1   | 18.2  | 16.1   |
| <b>PA-SIMes(NaOMe)-ts(1,6)</b>   | -3800.04969158 | -2680.84600771 | -12.1 | -3799.365328 | -2680.381915 | 7.8   | 19.9  | -424.9 |
| <b>PA-SIMes(NaOMe)-prod(1,6)</b> | -3800.10311238 | -2680.89942851 | -45.6 | -3799.418625 | -2680.435212 | -25.6 | 20.0  | 6.4    |
| <b>PA-PPh3(NaOMe)-prod(1,4)</b>  | -3911.12006641 | -2791.91638254 | -54.5 | -3910.572951 | -2791.589538 | -31.7 | 22.8  | 12.8   |
| <b>PA-PPh3(NaOMe)-ts(1,4)</b>    | -3911.05049032 | -2791.84680645 | -10.8 | -3910.510854 | -2791.527441 | 7.3   | 18.1  | -356.7 |
| <b>PA-PPh3(NaOMe)-ed(1,4)</b>    | -3911.06860824 | -2791.86492437 | -22.2 | -3910.526719 | -2791.543306 | -2.7  | 19.5  | 16.2   |
| <b>PPh3-Cu-allenyl</b>           | -2791.78064609 | -2791.78064609 | 30.7  | -2791.511938 | -2791.511938 | 17.0  | -13.7 | -8.5   |
| <b>PPh3-Cu(NaOMe)-allenyl</b>    | -3069.10617160 | -2791.82956621 | 0.0   | -3068.803691 | -2791.539001 | 0.0   | 0.0   | 20.7   |
| <b>PA-PPh3(NaOMe)-ed(1,6)</b>    | -3911.04850322 | -2791.84481935 | -9.6  | -3910.510871 | -2791.527458 | 7.2   | 16.8  | 12.8   |
| <b>PA-PPh3(NaOMe)-ts(1,6)</b>    | -3911.03470938 | -2791.83102551 | -0.9  | -3910.495249 | -2791.511836 | 17.0  | 18.0  | -446.9 |
| <b>PA-PPh3(NaOMe)-prod(1,6)</b>  | -3911.08630820 | -2791.88262433 | -33.3 | -3910.542647 | -2791.559234 | -12.7 | 20.6  | -6.9   |

Figure S14-1

|                                    |                |                |       |              |              |       |       |        |
|------------------------------------|----------------|----------------|-------|--------------|--------------|-------|-------|--------|
| <b>NaOtBu</b>                      | -395.11737857  |                |       | -395.027576  |              |       |       | 32.7   |
| <b>dienoate</b>                    | -841.92707848  |                |       | -841.718723  |              |       |       | 24.6   |
| <b>PA-Me2NHC(NaOtBu)-prod(1,4)</b> | -3299.19328289 | -2062.14882584 | -52.8 | -3298.681822 | -2061.935523 | -32.8 | 19.9  | 18.2   |
| <b>PA-Me2NHC(NaOtBu)-ts(1,4)</b>   | -3299.12254340 | -2062.07808635 | -8.4  | -3298.616012 | -2061.869713 | 8.5   | 16.9  | -363.3 |
| <b>PA-Me2NHC(NaOtBu)-ed(1,4)</b>   | -3299.13603253 | -2062.09157548 | -16.8 | -3298.627567 | -2061.881268 | 1.2   | 18.1  | 19.0   |
| <b>Me2NHC-Cu-allenyl</b>           | -2062.03078001 | -2062.03078001 | 21.3  | -2061.876100 | -2061.876100 | 4.5   | -16.8 | 21.6   |
| <b>Me2NHC-Cu(NaOtBu)-allenyl</b>   | -2457.18214053 | -2062.06476196 | 0.0   | -2456.910822 | -2061.883246 | 0.0   | 0.0   | 21.9   |
| <b>PA-Me2NHC(NaOtBu)-ed(1,6)</b>   | -3299.13575585 | -2062.09129880 | -16.7 | -3298.631215 | -2061.884916 | -1.0  | 15.6  | 13.7   |
| <b>PA-Me2NHC(NaOtBu)-ts(1,6)</b>   | -3299.12365436 | -2062.07919731 | -9.1  | -3298.616671 | -2061.870372 | 8.1   | 17.1  | -453.3 |
| <b>PA-Me2NHC(NaOtBu)-prod(1,6)</b> | -3299.17749962 | -2062.13304257 | -42.8 | -3298.666239 | -2061.919940 | -23.0 | 19.8  | 16.5   |
| <b>PA-PMe3(NaOtBu)-prod(1,4)</b>   | -3454.34900971 | -2217.30455266 | -49.8 | -3453.871365 | -2217.125066 | -26.0 | 23.8  | -2.2   |

|                                  |                |                |       |              |              |       |       |        |
|----------------------------------|----------------|----------------|-------|--------------|--------------|-------|-------|--------|
| <b>PA-PMe3(NaOtBu)-ts(1,4)</b>   | -3454.28410031 | -2217.23964326 | -9.0  | -3453.815964 | -2217.069665 | 8.8   | 17.8  | -357.4 |
| <b>PA-PMe3(NaOtBu)-ed(1,4)</b>   | -3454.29818810 | -2217.25373105 | -17.9 | -3453.830124 | -2217.083825 | -0.1  | 17.8  | 18.2   |
| <b>PMe3-Cu-allenyl</b>           | -2217.18081039 | -2217.18081039 | 27.9  | -2217.062239 | -2217.062239 | 13.5  | -14.4 | 11.6   |
| <b>PMe3-Cu(NaOtBu)-allenyl</b>   | -2612.34261472 | -2217.22523615 | 0.0   | -2612.111268 | -2217.083692 | 0.0   | 0.0   | 8.8    |
| <b>PA-PMe3(NaOtBu)-ed(1,6)</b>   | -3454.28842449 | -2217.24396744 | -11.8 | -3453.818447 | -2217.072148 | 7.2   | 19.0  | 19.3   |
| <b>PA-PMe3(NaOtBu)-ts(1,6)</b>   | -3454.27252064 | -2217.22806359 | -1.8  | -3453.801003 | -2217.054704 | 18.2  | 20.0  | -463.8 |
| <b>PA-PMe3(NaOtBu)-prod(1,6)</b> | -3454.32484583 | -2217.28038878 | -34.6 | -3453.850892 | -2217.104593 | -13.1 | 21.5  | 17.6   |

Figure S15-1

|                                     |                |                |       |              |              |      |      |        |
|-------------------------------------|----------------|----------------|-------|--------------|--------------|------|------|--------|
| <b>NaOph</b>                        | -468.85364944  |                |       | -468.794061  |              |      |      | 15.7   |
| <b>dienoate</b>                     | -841.92707848  |                |       | -841.718723  |              |      |      | 24.5   |
| <b>9d(NaOph)-Cu-allenyl</b>         | -3146.25617778 | -3988.18325626 | 0.0   | -3145.806149 | -3987.524872 | 0.0  | 0.0  | 11.9   |
| <b>PA-9d(NaOph)-ts(1,6major)_01</b> | -3988.22213482 | -3988.22213482 | -24.4 | -3987.529839 | -3987.529839 | -3.1 | 21.3 | -455.1 |
| <b>PA-9d(NaOph)-ts(1,6major)_02</b> | -3988.22242215 | -3988.22242215 | -24.6 | -3987.529646 | -3987.529646 | -3.0 | 21.6 | -444.6 |
| <b>PA-9d(NaOph)-ts(1,6major)_03</b> | -3988.21826606 | -3988.21826606 | -22.0 | -3987.526957 | -3987.526957 | -1.3 | 20.7 | -458.7 |
| <b>PA-9d(NaOph)-ts(1,6minor)_01</b> | -3988.21792967 | -3988.21792967 | -21.8 | -3987.527227 | -3987.527227 | -1.5 | 20.3 | -450.4 |
| <b>PA-9d(NaOph)-ts(1,6minor)_02</b> | -3988.21925399 | -3988.21925399 | -22.6 | -3987.527003 | -3987.527003 | -1.3 | 21.3 | -446.9 |
| <b>PA-9d(NaOph)-ts(1,6minor)_03</b> | -3988.21926870 | -3988.21926870 | -22.6 | -3987.526287 | -3987.526287 | -0.9 | 21.7 | -449.7 |
| <b>PA-9d(NaOph)-ts(1,6minor)_04</b> | -3988.21743768 | -3988.21743768 | -21.4 | -3987.525800 | -3987.525800 | -0.6 | 20.9 | -446.6 |
| <b>PA-9d(NaOph)-ts(1,6minor)_05</b> | -3988.21946363 | -3988.21946363 | -22.7 | -3987.524868 | -3987.524868 | 0.0  | 22.7 | -426.0 |
| <b>PA-9d(NaOph)-ts(1,6minor)_06</b> | -3988.21636174 | -3988.21636174 | -20.8 | -3987.522534 | -3987.522534 | 1.5  | 22.2 | -441.9 |
| <b>PA-9d(NaOph)-ts(1,6minor)_07</b> | -3988.21954606 | -3988.21954606 | -22.8 | -3987.525031 | -3987.525031 | -0.1 | 22.7 | -424.4 |
| <b>PA-9d(NaOph)-ts(1,6minor)_08</b> | -3988.21575574 | -3988.21575574 | -20.4 | -3987.522283 | -3987.522283 | 1.6  | 22.0 | -451.9 |

Figure S15-2

|                                     |                |                |       |              |              |      |      |        |
|-------------------------------------|----------------|----------------|-------|--------------|--------------|------|------|--------|
| <b>dienoate</b>                     | -841.92707848  |                |       | -841.718723  |              |      |      | 24.5   |
| <b>9b(NaOph)-Cu-allenyl</b>         | -3146.25183127 | -3988.17890975 | 0.0   | -3145.801041 | -3987.519764 | 0.0  | 0.0  | 14.5   |
| <b>PA-9b(NaOph)-ts(1,6major)_01</b> | -3988.21834759 | -3988.21834759 | -24.7 | -3987.526031 | -3987.526031 | -3.9 | 20.8 | -441.8 |
| <b>PA-9b(NaOph)-ts(1,6major)_02</b> | -3988.21729738 | -3988.21729738 | -24.1 | -3987.524378 | -3987.524378 | -2.9 | 21.2 | -451.3 |
| <b>PA-9b(NaOph)-ts(1,6major)_03</b> | -3988.21368855 | -3988.21368855 | -21.8 | -3987.521201 | -3987.521201 | -0.9 | 20.9 | -436.1 |
| <b>PA-9b(NaOph)-ts(1,6major)_04</b> | -3988.21708629 | -3988.21708629 | -24.0 | -3987.524815 | -3987.524815 | -3.2 | 20.8 | -456.1 |
| <b>PA-9b(NaOph)-ts(1,6major)_05</b> | -3988.21870349 | -3988.21870349 | -25.0 | -3987.525618 | -3987.525618 | -3.7 | 21.3 | -445.3 |
| <b>PA-9b(NaOph)-ts(1,6major)_06</b> | -3988.21476261 | -3988.21476261 | -22.5 | -3987.519765 | -3987.519765 | 0.0  | 22.5 | -437.7 |
| <b>PA-9b(NaOph)-ts(1,6major)_07</b> | -3988.20625665 | -3988.20625665 | -17.2 | -3987.517045 | -3987.517045 | 1.7  | 18.9 | -462.5 |
| <b>PA-9b(NaOph)-ts(1,6minor)_01</b> | -3988.21330777 | -3988.21330777 | -21.6 | -3987.520948 | -3987.520948 | -0.7 | 20.8 | -465.4 |

|                              |                |                |       |              |              |      |      |        |
|------------------------------|----------------|----------------|-------|--------------|--------------|------|------|--------|
| PA-9b(NaOPh)-ts(1,6minor)_02 | -3988.21880720 | -3988.21880720 | -25.0 | -3987.526760 | -3987.526760 | -4.4 | 20.6 | -417.0 |
| PA-9b(NaOPh)-ts(1,6minor)_03 | -3988.21880751 | -3988.21880751 | -25.0 | -3987.526691 | -3987.526691 | -4.3 | 20.7 | -417.0 |
| PA-9b(NaOPh)-ts(1,6minor)_04 | -3988.21355466 | -3988.21355466 | -21.7 | -3987.520570 | -3987.520570 | -0.5 | 21.2 | -462.6 |
| PA-9b(NaOPh)-ts(1,6minor)_05 | -3988.21868997 | -3988.21868997 | -25.0 | -3987.523538 | -3987.523538 | -2.4 | 22.6 | -417.9 |
| PA-9b(NaOPh)-ts(1,6minor)_06 | -3988.21301922 | -3988.21301922 | -21.4 | -3987.521281 | -3987.521281 | -1.0 | 20.5 | -426.0 |
| PA-9b(NaOPh)-ts(1,6minor)_07 | -3988.21538734 | -3988.21538734 | -22.9 | -3987.520567 | -3987.520567 | -0.5 | 22.4 | -421.6 |
| PA-9b(NaOPh)-ts(1,6minor)_08 | -3988.21376729 | -3988.21376729 | -21.9 | -3987.522139 | -3987.522139 | -1.5 | 20.4 | -435.9 |
| PA-9b(NaOPh)-ts(1,6minor)_09 | -3988.20604707 | -3988.20604707 | -17.0 | -3987.511377 | -3987.511377 | 5.3  | 22.3 | -450.0 |

Figure S15-3

|                           |                |                |       |              |              |      |      |        |
|---------------------------|----------------|----------------|-------|--------------|--------------|------|------|--------|
| dienoate                  | -841.92707848  |                |       | -841.718723  |              |      |      | 24.5   |
| 9d(Na)-Cu-allenyl         | -2839.06020575 | -3680.98728423 | 0.0   | -2838.709953 | -3680.428676 | 0.0  | 0.0  | 14.4   |
| PA-9d(Na)-ts(1,6major)_01 | -3681.01695194 | -3681.01695194 | -18.6 | -3680.425988 | -3680.425988 | 1.7  | 20.3 | -446.9 |
| PA-9d(Na)-ts(1,6major)_02 | -3681.01674239 | -3681.01674239 | -18.5 | -3680.427020 | -3680.427020 | 1.0  | 19.5 | -425.8 |
| PA-9d(Na)-ts(1,6major)_03 | -3681.01674622 | -3681.01674622 | -18.5 | -3680.426398 | -3680.426398 | 1.4  | 19.9 | -439.7 |
| PA-9d(Na)-ts(1,6major)_04 | -3681.01671223 | -3681.01671223 | -18.5 | -3680.426081 | -3680.426081 | 1.6  | 20.1 | -455.5 |
| PA-9d(Na)-ts(1,6major)_05 | -3681.01685875 | -3681.01685875 | -18.6 | -3680.425350 | -3680.425350 | 2.1  | 20.6 | -455.9 |
| PA-9d(Na)-ts(1,6major)_06 | -3681.01677377 | -3681.01677377 | -18.5 | -3680.425936 | -3680.425936 | 1.7  | 20.2 | -425.8 |
| PA-9d(Na)-ts(1,6major)_07 | -3681.01671535 | -3681.01671535 | -18.5 | -3680.425560 | -3680.425560 | 2.0  | 20.4 | -426.2 |
| PA-9d(Na)-ts(1,6major)_08 | -3681.01672564 | -3681.01672564 | -18.5 | -3680.425099 | -3680.425099 | 2.2  | 20.7 | -455.7 |
| PA-9d(Na)-ts(1,6major)_09 | -3681.01602735 | -3681.01602735 | -18.0 | -3680.424545 | -3680.424545 | 2.6  | 20.6 | -466.7 |
| PA-9d(Na)-ts(1,6major)_10 | -3681.01100626 | -3681.01100626 | -14.9 | -3680.420047 | -3680.420047 | 5.4  | 20.3 | -418.2 |
| PA-9d(Na)-ts(1,6major)_11 | -3681.01145389 | -3681.01145389 | -15.2 | -3680.421377 | -3680.421377 | 4.6  | 19.7 | -445.8 |
| PA-9d(Na)-ts(1,6major)_12 | -3681.01103126 | -3681.01103126 | -14.9 | -3680.419733 | -3680.419733 | 5.6  | 20.5 | -418.4 |
| PA-9d(Na)-ts(1,6major)_13 | -3681.01155941 | -3681.01155941 | -15.2 | -3680.420595 | -3680.420595 | 5.1  | 20.3 | -461.8 |
| PA-9d(Na)-ts(1,6major)_14 | -3681.00352015 | -3681.00352015 | -10.2 | -3680.411575 | -3680.411575 | 10.7 | 20.9 | -478.6 |
| PA-9d(Na)-ts(1,6major)_15 | -3680.99812292 | -3680.99812292 | -6.8  | -3680.409627 | -3680.409627 | 12.0 | 18.8 | -456.2 |
| PA-9d(Na)-ts(1,6major)_16 | -3681.00337669 | -3681.00337669 | -10.1 | -3680.412046 | -3680.412046 | 10.4 | 20.5 | -462.6 |
| PA-9d(Na)-ts(1,6major)_17 | -3680.99860603 | -3680.99860603 | -7.1  | -3680.406275 | -3680.406275 | 14.1 | 21.2 | -447.6 |
| PA-9d(Na)-ts(1,6minor)_01 | -3681.01261478 | -3681.01261478 | -15.9 | -3680.424040 | -3680.424040 | 2.9  | 18.8 | -460.0 |
| PA-9d(Na)-ts(1,6minor)_02 | -3681.01062138 | -3681.01062138 | -14.6 | -3680.420615 | -3680.420615 | 5.1  | 19.7 | -444.3 |
| PA-9d(Na)-ts(1,6minor)_03 | -3681.01372521 | -3681.01372521 | -16.6 | -3680.422611 | -3680.422611 | 3.8  | 20.4 | -473.8 |
| PA-9d(Na)-ts(1,6minor)_04 | -3681.01376311 | -3681.01376311 | -16.6 | -3680.422164 | -3680.422164 | 4.1  | 20.7 | -473.6 |
| PA-9d(Na)-ts(1,6minor)_05 | -3681.01376311 | -3681.01376311 | -16.6 | -3680.422162 | -3680.422162 | 4.1  | 20.7 | -473.6 |
| PA-9d(Na)-ts(1,6minor)_06 | -3681.01280902 | -3681.01280902 | -16.0 | -3680.420713 | -3680.420713 | 5.0  | 21.0 | -467.7 |
| PA-9d(Na)-ts(1,6minor)_07 | -3681.01290228 | -3681.01290228 | -16.1 | -3680.420054 | -3680.420054 | 5.4  | 21.5 | -467.7 |
| PA-9d(Na)-ts(1,6minor)_08 | -3681.00936876 | -3681.00936876 | -13.9 | -3680.419415 | -3680.419415 | 5.8  | 19.7 | -472.8 |
| PA-9d(Na)-ts(1,6minor)_09 | -3681.00528804 | -3681.00528804 | -11.3 | -3680.414418 | -3680.414418 | 8.9  | 20.2 | -436.3 |

Figure S15-4

|                                  |                |                |       |              |              |      |      |        |
|----------------------------------|----------------|----------------|-------|--------------|--------------|------|------|--------|
| <b>9b(Na)-Cu-allenyl</b>         | -2839.05552233 | -3680.98260081 | 0.0   | -2838.703755 | -3680.422478 | 0.0  | 0.0  | 18.5   |
| <b>PA-9b(Na)-ts(1,6major)_01</b> | -3681.01420703 | -3681.01420703 | -19.8 | -3680.425466 | -3680.425466 | -1.9 | 18.0 | -427.0 |
| <b>PA-9b(Na)-ts(1,6major)_02</b> | -3681.01281667 | -3681.01281667 | -19.0 | -3680.420838 | -3680.420838 | 1.0  | 20.0 | -438.8 |
| <b>PA-9b(Na)-ts(1,6major)_03</b> | -3681.01313518 | -3681.01313518 | -19.2 | -3680.421077 | -3680.421077 | 0.9  | 20.0 | -434.7 |
| <b>PA-9b(Na)-ts(1,6major)_04</b> | -3681.00780852 | -3681.00780852 | -15.8 | -3680.413734 | -3680.413734 | 5.5  | 21.3 | -440.9 |
| <b>PA-9b(Na)-ts(1,6major)_05</b> | -3681.00473590 | -3681.00473590 | -13.9 | -3680.411641 | -3680.411641 | 6.8  | 20.7 | -469.7 |
| <b>PA-9b(Na)-ts(1,6minor)_01</b> | -3681.00662586 | -3681.00662586 | -15.1 | -3680.413477 | -3680.413477 | 5.6  | 20.7 | -473.7 |
| <b>PA-9b(Na)-ts(1,6minor)_02</b> | -3681.00610479 | -3681.00610479 | -14.7 | -3680.413346 | -3680.413346 | 5.7  | 20.5 | -471.4 |
| <b>PA-9b(Na)-ts(1,6minor)_03</b> | -3681.00799031 | -3681.00799031 | -15.9 | -3680.415714 | -3680.415714 | 4.2  | 20.2 | -409.9 |
| <b>PA-9b(Na)-ts(1,6minor)_04</b> | -3681.00623136 | -3681.00623136 | -14.8 | -3680.411941 | -3680.411941 | 6.6  | 21.4 | -470.1 |
| <b>PA-9b(Na)-ts(1,6minor)_05</b> | -3681.00676070 | -3681.00676070 | -15.2 | -3680.412139 | -3680.412139 | 6.5  | 21.6 | -408.8 |
| <b>PA-9b(Na)-ts(1,6minor)_06</b> | -3681.00111925 | -3681.00111925 | -11.6 | -3680.407699 | -3680.407699 | 9.3  | 20.9 | -471.1 |
| <b>PA-9b(Na)-ts(1,6minor)_07</b> | -3681.00898900 | -3681.00898900 | -16.6 | -3680.413956 | -3680.413956 | 5.3  | 21.9 | -435.9 |
| <b>PA-9b(Na)-ts(1,6minor)_08</b> | -3681.00969248 | -3681.00969248 | -17.0 | -3680.414055 | -3680.414055 | 5.3  | 22.3 | -442.2 |

Figure S15-5

|                                     |                |                |       |              |              |       |      |        |
|-------------------------------------|----------------|----------------|-------|--------------|--------------|-------|------|--------|
| <b>9d(NaOPh)-Cu-allyl_01</b>        | -3597.06845638 | -4438.99553486 | 0.0   | -3596.405435 | -4438.124158 | 0.0   | 0.0  | 14.7   |
| <b>AA-9d(NaOPh)-ts(1,6major)_01</b> | -4439.05034678 | -4439.05034678 | -34.4 | -4438.140890 | -4438.140890 | -10.5 | 23.9 | -323.9 |
| <b>AA-9d(NaOPh)-ts(1,6major)_02</b> | -4439.05088590 | -4439.05088590 | -34.7 | -4438.141250 | -4438.141250 | -10.7 | 24.0 | -338.7 |
| <b>AA-9d(NaOPh)-ts(1,6minor)_01</b> | -4439.04244814 | -4439.04244814 | -29.4 | -4438.135375 | -4438.135375 | -7.0  | 22.4 | -345.5 |
| <b>AA-9d(NaOPh)-ts(1,6minor)_02</b> | -4439.04486199 | -4439.04486199 | -31.0 | -4438.135620 | -4438.135620 | -7.2  | 23.8 | -347.7 |
| <b>AA-9d(NaOPh)-ts(1,6minor)_03</b> | -4439.04473040 | -4439.04473040 | -30.9 | -4438.135930 | -4438.135930 | -7.4  | 23.5 | -309.8 |
| <b>AA-9d(NaOPh)-ts(1,6minor)_04</b> | -4439.04421454 | -4439.04421454 | -30.5 | -4438.135735 | -4438.135735 | -7.3  | 23.3 | -323.7 |
| <b>AA-9d(NaOPh)-ts(1,6minor)_05</b> | -4439.04612350 | -4439.04612350 | -31.7 | -4438.136326 | -4438.136326 | -7.6  | 24.1 | -325.2 |
| <b>AA-9d(NaOPh)-ts(1,6minor)_06</b> | -4439.04259063 | -4439.04259063 | -29.5 | -4438.133463 | -4438.133463 | -5.8  | 23.7 | -326.3 |
| <b>AA-9d(NaOPh)-ts(1,6minor)_07</b> | -4439.04642717 | -4439.04642717 | -31.9 | -4438.136104 | -4438.136104 | -7.5  | 24.4 | -374.3 |

Figure S15-6

|                                     |                |                |       |              |              |      |      |        |
|-------------------------------------|----------------|----------------|-------|--------------|--------------|------|------|--------|
| <b>9b(NaOPh)-Cu-allyl_01</b>        | -3597.06856996 | -4438.99564844 | 0.0   | -3596.404446 | -4438.123169 | 0.0  | 0.0  | 15.3   |
| <b>AA-9b(NaOPh)-ts(1,6major)_01</b> | -4439.04225300 | -4439.04225300 | -29.2 | -4438.134169 | -4438.134169 | -6.9 | 22.3 | -302.4 |
| <b>AA-9b(NaOPh)-ts(1,6major)_02</b> | -4439.04481123 | -4439.04481123 | -30.9 | -4438.136397 | -4438.136397 | -8.3 | 22.5 | -334.4 |
| <b>AA-9b(NaOPh)-ts(1,6minor)_01</b> | -4439.04436355 | -4439.04436355 | -30.6 | -4438.137712 | -4438.137712 | -9.1 | 21.4 | -305.4 |
| <b>AA-9b(NaOPh)-ts(1,6minor)_02</b> | -4439.04584920 | -4439.04584920 | -31.5 | -4438.138137 | -4438.138137 | -9.4 | 22.1 | -309.1 |
| <b>AA-9b(NaOPh)-ts(1,6minor)_03</b> | -4439.04644860 | -4439.04644860 | -31.9 | -4438.137711 | -4438.137711 | -9.1 | 22.8 | -305.4 |
| <b>AA-9b(NaOPh)-ts(1,6minor)_04</b> | -4439.04525456 | -4439.04525456 | -31.1 | -4438.135009 | -4438.135009 | -7.4 | 23.7 | -267.5 |



Figure S15-7

|                           |                |                |       |              |              |      |      |        |
|---------------------------|----------------|----------------|-------|--------------|--------------|------|------|--------|
| dienoate                  | -841.92707848  |                |       | -841.718723  |              |      |      | 24.5   |
| <b>9d(Na)-Cu-allyl_01</b> | -3289.87323919 | -4131.80031767 | 0.0   | -3289.308165 | -4131.026888 | 0.0  | 0.0  | 20.5   |
| AA-9d(Na)-ts(1,6major)_01 | -4131.84208395 | -4131.84208395 | -26.2 | -4131.035217 | -4131.035217 | -5.2 | 21.0 | -388.7 |
| AA-9d(Na)-ts(1,6major)_02 | -4131.84213530 | -4131.84213530 | -26.2 | -4131.032534 | -4131.032534 | -3.5 | 22.7 | -365.1 |
| AA-9d(Na)-ts(1,6major)_03 | -4131.84066850 | -4131.84066850 | -25.3 | -4131.030186 | -4131.030186 | -2.1 | 23.3 | -367.1 |
| AA-9d(Na)-ts(1,6minor)_01 | -4131.83826859 | -4131.83826859 | -23.8 | -4131.029821 | -4131.029821 | -1.8 | 22.0 | -396.3 |
| AA-9d(Na)-ts(1,6minor)_02 | -4131.83828091 | -4131.83828091 | -23.8 | -4131.029349 | -4131.029349 | -1.5 | 22.3 | -396.5 |
| AA-9d(Na)-ts(1,6minor)_03 | -4131.83588529 | -4131.83588529 | -22.3 | -4131.028104 | -4131.028104 | -0.8 | 21.6 | -368.2 |
| AA-9d(Na)-ts(1,6minor)_04 | -4131.83709746 | -4131.83709746 | -23.1 | -4131.027647 | -4131.027647 | -0.5 | 22.6 | -406.0 |
| AA-9d(Na)-ts(1,6minor)_05 | -4131.83763873 | -4131.83763873 | -23.4 | -4131.029058 | -4131.029058 | -1.4 | 22.1 | -403.7 |
| AA-9d(Na)-ts(1,6minor)_06 | -4131.83545844 | -4131.83545844 | -22.1 | -4131.026478 | -4131.026478 | 0.3  | 22.3 | -358.7 |
| AA-9d(Na)-ts(1,6minor)_07 | -4131.83586301 | -4131.83586301 | -22.3 | -4131.027099 | -4131.027099 | -0.1 | 22.2 | -394.3 |

Figure S15-8

|                           |                |                |       |              |              |      |      |        |
|---------------------------|----------------|----------------|-------|--------------|--------------|------|------|--------|
| <b>9b(Na)-Cu-allyl_01</b> | -3289.86902565 | -4131.79610413 | 0.0   | -3289.305371 | -4131.024094 | 0.0  | 0.0  | 17.5   |
| AA-9b(Na)-ts(1,6major)_01 | -4131.83854441 | -4131.83854441 | -26.6 | -4131.030376 | -4131.030376 | -3.9 | 22.7 | -314.0 |
| AA-9b(Na)-ts(1,6major)_02 | -4131.83936333 | -4131.83936333 | -27.1 | -4131.030009 | -4131.030009 | -3.7 | 23.4 | -320.0 |
| AA-9b(Na)-ts(1,6major)_03 | -4131.83794438 | -4131.83794438 | -26.3 | -4131.029341 | -4131.029341 | -3.3 | 23.0 | -314.9 |
| AA-9b(Na)-ts(1,6major)_04 | -4131.83111422 | -4131.83111422 | -22.0 | -4131.018011 | -4131.018011 | 3.8  | 25.8 | -361.4 |
| AA-9b(Na)-ts(1,6minor)_01 | -4131.83618193 | -4131.83618193 | -25.1 | -4131.028391 | -4131.028391 | -2.7 | 22.5 | -326.5 |
| AA-9b(Na)-ts(1,6minor)_02 | -4131.83467184 | -4131.83467184 | -24.2 | -4131.027319 | -4131.027319 | -2.0 | 22.2 | -367.2 |
| AA-9b(Na)-ts(1,6minor)_03 | -4131.83689786 | -4131.83689786 | -25.6 | -4131.028480 | -4131.028480 | -2.8 | 22.8 | -278.5 |
| AA-9b(Na)-ts(1,6minor)_04 | -4131.83652085 | -4131.83652085 | -25.4 | -4131.027501 | -4131.027501 | -2.1 | 23.2 | -256.3 |
| AA-9b(Na)-ts(1,6minor)_05 | -4131.83783555 | -4131.83783555 | -26.2 | -4131.027189 | -4131.027189 | -1.9 | 24.2 | -304.4 |

Figure S15-9

|                                   |                |                |      |              |              |     |     |      |
|-----------------------------------|----------------|----------------|------|--------------|--------------|-----|-----|------|
| NaOPh                             | -468.85364944  |                |      | -468.794061  |              |     |     | 15.7 |
| (PhO)2BpinNa                      | -1186.36814498 |                |      | -1186.044662 |              |     |     | 14.0 |
| PhOBpin                           | -717.46665894  |                |      | -717.228760  |              |     |     | 34.0 |
| dienoate                          | -841.92707848  |                |      | -841.718723  |              |     |     | 24.5 |
| <b>9d(Naborate)-Cu-allenyl_01</b> | -3556.59972133 | -4398.52679981 | 0.0  | -3555.987651 | -4397.706374 | 0.0 | 0.0 | 7.0  |
| <b>9d(Naborate)-Cu-allenyl_02</b> | -3556.59879587 | -4398.52587435 | 0.6  | -3555.985261 | -4397.703984 | 1.5 | 0.9 | 11.9 |
| <b>9d(Naborate)-Cu-allenyl_03</b> | -3556.60003110 | -4398.52710958 | -0.2 | -3555.985138 | -4397.703861 | 1.6 | 1.8 | 12.6 |
| <b>9d(Naborate)-Cu-allenyl_04</b> | -3556.60702129 | -4398.53409977 | -4.6 | -3555.986104 | -4397.704827 | 1.0 | 5.6 | 23.7 |

|                                        |                |                |       |              |              |     |      |        |
|----------------------------------------|----------------|----------------|-------|--------------|--------------|-----|------|--------|
| <b>9d(Naborate)-Cu-allenyl_05</b>      | -3556.59701117 | -4398.52408965 | 1.7   | -3555.979780 | -4397.698503 | 4.9 | 3.2  | 13.8   |
| <b>9d(Naborate)-Cu-allenyl_06</b>      | -3556.60439142 | -4398.53146990 | -2.9  | -3555.986428 | -4397.705151 | 0.8 | 3.7  | 20.0   |
| <b>9d(Naborate)-Cu-allenyl_07</b>      | -3556.59700883 | -4398.52408731 | 1.7   | -3555.979518 | -4397.698241 | 5.1 | 3.4  | 14.2   |
| <b>PA-9b(Naborate)-ts(1,6major)_01</b> | -4398.56325172 | -4398.56325172 | -22.9 | -4397.705820 | -4397.705820 | 0.3 | 23.2 | -433.7 |
| <b>PA-9b(Naborate)-ts(1,6major)_02</b> | -4398.56128250 | -4398.56128250 | -21.6 | -4397.705461 | -4397.705461 | 0.6 | 22.2 | -438.4 |
| <b>PA-9b(Naborate)-ts(1,6major)_03</b> | -4398.56061938 | -4398.56061938 | -21.2 | -4397.702017 | -4397.702017 | 2.7 | 24.0 | -437.5 |
| <b>PA-9b(Naborate)-ts(1,6major)_04</b> | -4398.56064928 | -4398.56064928 | -21.2 | -4397.704192 | -4397.704192 | 1.4 | 22.6 | -431.7 |
| <b>PA-9b(Naborate)-ts(1,6major)_05</b> | -4398.55507914 | -4398.55507914 | -17.7 | -4397.699424 | -4397.699424 | 4.4 | 22.1 | -437.5 |
| <b>PA-9b(Naborate)-ts(1,6major)_06</b> | -4398.56485118 | -4398.56485118 | -23.9 | -4397.706188 | -4397.706188 | 0.1 | 24.0 | -459.0 |
| <b>PA-9b(Naborate)-ts(1,6major)_07</b> | -4398.56096625 | -4398.56096625 | -21.4 | -4397.702604 | -4397.702604 | 2.4 | 23.8 | -450.7 |
| <b>PA-9b(Naborate)-ts(1,6major)_08</b> | -4398.56213541 | -4398.56213541 | -22.2 | -4397.701620 | -4397.701620 | 3.0 | 25.2 | -466.0 |
| <b>PA-9b(Naborate)-ts(1,6major)_09</b> | -4398.56071055 | -4398.56071055 | -21.3 | -4397.700859 | -4397.700859 | 3.5 | 24.7 | -403.1 |
| <b>PA-9b(Naborate)-ts(1,6major)_10</b> | -4398.56065632 | -4398.56065632 | -21.2 | -4397.700390 | -4397.700390 | 3.8 | 25.0 | -402.8 |
| <b>9d-Cu-allenyl</b>                   | -2677.36469942 | -3519.29177790 | 0.0   | -2677.000607 | -3518.719330 | 0.0 | 0.0  | 18.9   |
| <b>PA-9b-ts(1,6major)_01</b>           | -3519.31528051 | -3519.31528051 | -14.7 | -3518.710003 | -3518.710003 | 5.9 | 20.6 | -465.3 |
| <b>PA-9b-ts(1,6major)_02</b>           | -3519.31441637 | -3519.31441637 | -14.2 | -3518.710549 | -3518.710549 | 5.5 | 19.7 | -439.9 |
| <b>PA-9b-ts(1,6major)_03</b>           | -3519.31189147 | -3519.31189147 | -12.6 | -3518.706575 | -3518.706575 | 8.0 | 20.6 | -467.9 |
| <b>PA-9b-ts(1,6major)_04</b>           | -3519.31309758 | -3519.31309758 | -13.4 | -3518.707448 | -3518.707448 | 7.5 | 20.8 | -455.2 |
| <b>PA-9b-ts(1,6major)_05</b>           | -3519.31462563 | -3519.31462563 | -14.3 | -3518.707187 | -3518.707187 | 7.6 | 22.0 | -460.9 |

E ..... electronic energy in Hartree after opt with  $\omega$ B97XD/Def2SVP in thf(PCM)

E(sum) electronic energy in Hartree after opt with  $\omega$ B97XD/Def2SVP in thf(PCM) after mass balance

G ..... gas phase sum of electronic and thermal free energies in Hartree after opt with  $\omega$ B97XD/Def2SVP in thf(PCM)

G(sum) gas phase sum of electronic and thermal free energies in Hartree after opt with  $\omega$ B97XD/Def2SVP in thf(PCM) after mass balance

$\Delta E$  ... relative electronic energy in kcal/mol after opt with  $\omega$ B97XD/Def2SVP in thf(PCM)

$\Delta G$  ... relative free energy in kcal/mol after opt with  $\omega$ B97XD/Def2SVP in thf(PCM)

$\Delta G_{\text{corr}}$  thermal correction to free energy in kcal/mol obtained with  $\omega$ B97XD/Def2SVP in thf(PCM) ( $\Delta G = \Delta E + \Delta G_{\text{corr}}$ )

Table S2. Single point energies in Figures S1-1–S15-9 with  $\omega$ B97XD, M06 and MN12SX

| structure                    | $\omega$ B97XD/Def2TZVPP <sub>thf(SMD)</sub> |                |                | M06/Def2TZVPP <sub>thf(SMD)</sub> |                |                | MN12SX/Def2TZVPP <sub>thf(SMD)</sub> |                |                |
|------------------------------|----------------------------------------------|----------------|----------------|-----------------------------------|----------------|----------------|--------------------------------------|----------------|----------------|
|                              | E(sp,sum)                                    | $\Delta$ E(sp) | $\Delta$ G(sp) | E(sp,sum)                         | $\Delta$ E(sp) | $\Delta$ G(sp) | E(sp,sum)                            | $\Delta$ E(sp) | $\Delta$ G(sp) |
|                              | [hartree]                                    | [kcal/mol]     | [kcal/mol]     | [hartree]                         | [kcal/mol]     | [kcal/mol]     | [hartree]                            | [kcal/mol]     | [kcal/mol]     |
| <b>Figure S1-1</b>           |                                              |                |                |                                   |                |                |                                      |                |                |
| dienoate                     |                                              |                |                |                                   |                |                |                                      |                |                |
| PhOH                         |                                              |                |                |                                   |                |                |                                      |                |                |
| NaOPh                        |                                              |                |                |                                   |                |                |                                      |                |                |
| tBuOH                        |                                              |                |                |                                   |                |                |                                      |                |                |
| NaOtBu                       |                                              |                |                |                                   |                |                |                                      |                |                |
| PhOBpin                      |                                              |                |                |                                   |                |                |                                      |                |                |
| (PhO)2BpinNa                 |                                              |                |                |                                   |                |                |                                      |                |                |
| 9d-Cu-allenyl                | -3917.02235026                               | 0.0            | 0.0            | -3916.13339022                    | 0.0            | 0.0            | -3915.68723465                       | 0.0            | 0.0            |
| PA-9d(Na)-ts(1,6major)       | -3917.05625370                               | -21.3          | 0.7            | -3916.16406749                    | -19.3          | 2.7            | -3915.71092569                       | -14.9          | 7.1            |
| 9d-Cu-allenyl                | -3990.83197127                               | 0.0            | 0.0            | -3989.92599364                    | 0.0            | 0.0            | -3989.50539943                       | 0.0            | 0.0            |
| PA-9d(Na)-ts(1,6major)       | -3990.84100045                               | -5.7           | 16.0           | -3989.93198846                    | -3.8           | 17.9           | -3989.50619279                       | -0.5           | 21.2           |
| 9d-Cu-allenyl                | -3990.83197127                               | 0.0            | 0.0            | -3989.92599364                    | 0.0            | 0.0            | -3989.50539943                       | 0.0            | 0.0            |
| PA-9d(NaOPh)-ts(1,6major)    | -3990.88771241                               | -35.0          | 2.8            | -3989.97360811                    | -29.9          | 7.9            | -3989.54407839                       | -24.3          | 13.5           |
| 9d-Cu-allenyl                | -3521.60502971                               | 0.0            | 0.0            | -3520.81022808                    | 0.0            | 0.0            | -3520.43853460                       | 0.0            | 0.0            |
| PA-9d-ts(1,6major)           | -3521.60337835                               | 1.0            | 20.8           | -3520.80721035                    | 1.9            | 21.6           | -3520.42723261                       | 7.1            | 26.8           |
| 9d-Cu-allenyl                | -4709.09162998                               | 24.7           | 8.4            | -4707.92901238                    | 21.3           | 5.0            | -4707.42546453                       | 22.8           | 6.4            |
| 9d-Cu-allenyl                | -4709.13104909                               | 0.0            | 0.0            | -4707.96295860                    | 0.0            | 0.0            | -4707.46173526                       | 0.0            | 0.0            |
| PA-9d(Naborate)-ts(1,6major) | -4709.16683434                               | -22.5          | 1.6            | -4707.99538130                    | -20.3          | 3.7            | -4707.48509002                       | -14.7          | 9.4            |
| <b>Figure S2-1</b>           |                                              |                |                |                                   |                |                |                                      |                |                |
| PA-9d(NaOPh)-prod(1,6major)  | -3990.93800549                               | -42.3          | -19.3          | -3990.01574785                    | -36.2          | -13.2          | -3989.58455465                       | -31.1          | -8.1           |
| PA-9d(NaOPh)-ts(1,6major)    | -3990.88771241                               | -10.7          | 10.5           | -3989.97360811                    | -9.8           | 11.5           | -3989.54407839                       | -5.7           | 15.6           |
| PA-9d(NaOPh)-pc(1,6major)    | -3990.90290388                               | -20.3          | 0.4            | -3989.98535431                    | -17.2          | 3.5            | -3989.55936552                       | -15.3          | 5.4            |
| 9d(NaOPh)-Cu-allenyl         | -3990.87058638                               | 0.0            | 0.0            | -3989.95800524                    | 0.0            | 0.0            | -3989.53501617                       | 0.0            | 0.0            |
| 9b(NaOPh)-Cu-allenyl         | -3990.86589294                               | 0.0            | 0.0            | -3989.95169678                    | 0.0            | 0.0            | -3989.52840609                       | 0.0            | 0.0            |
| PA-9b(NaOPh)-pc(1,6major)    | -3990.90018125                               | -21.5          | -1.1           | -3989.98116503                    | -18.5          | 1.9            | -3989.55380230                       | -15.9          | 4.5            |
| PA-9b(NaOPh)-ts(1,6major)    | -3990.88583980                               | -12.5          | 8.3            | -3989.96949657                    | -11.2          | 9.6            | -3989.53857734                       | -6.4           | 14.4           |
| PA-9b(NaOPh)-prod(1,6major)  | -3990.93430599                               | -42.9          | -20.6          | -3990.01285705                    | -38.4          | -16.0          | -3989.57956414                       | -32.1          | -9.7           |

|                                    |                |       |       |                |       |       |                |       |      |
|------------------------------------|----------------|-------|-------|----------------|-------|-------|----------------|-------|------|
| <b>PA-9d(NaOPh)-prod(1,6minor)</b> | -3990.93290336 | -39.1 | -17.2 | -3990.01143988 | -33.5 | -11.6 | -3989.58039504 | -28.5 | -6.6 |
| <b>PA-9d(NaOPh)-ts(1,6minor)</b>   | -3990.88435999 | -8.6  | 11.6  | -3989.97142413 | -8.4  | 11.9  | -3989.54116499 | -3.9  | 16.4 |
| <b>PA-9d(NaOPh)-pc(1,6minor)</b>   | -3990.89850237 | -17.5 | 2.4   | -3989.98158240 | -14.8 | 5.1   | -3989.55414047 | -12.0 | 7.9  |
| <b>9d(NaOPh)-Cu-allenyl</b>        | -3990.87058638 | 0.0   | 0.0   | -3989.95800524 | 0.0   | 0.0   | -3989.53501617 | 0.0   | 0.0  |
| <b>9b(NaOPh)-Cu-allenyl</b>        | -3990.86589294 | 0.0   | 0.0   | -3989.95169678 | 0.0   | 0.0   | -3989.52840609 | 0.0   | 0.0  |
| <b>PA-9b(NaOPh)-pc(1,6minor)</b>   | -3990.89534926 | -18.5 | 1.9   | -3989.97550961 | -14.9 | 5.4   | -3989.54744118 | -11.9 | 8.4  |
| <b>PA-9b(NaOPh)-ts(1,6minor)</b>   | -3990.87893790 | -8.2  | 12.7  | -3989.96342848 | -7.4  | 13.5  | -3989.53149363 | -1.9  | 18.9 |
| <b>PA-9b(NaOPh)-prod(1,6minor)</b> | -3990.93100974 | -40.9 | -18.0 | -3990.00918140 | -36.1 | -13.2 | -3989.57515695 | -29.3 | -6.5 |

**Figure S3-1**

|                                    |                |       |       |                |       |       |                |       |       |
|------------------------------------|----------------|-------|-------|----------------|-------|-------|----------------|-------|-------|
| <b>AA-9d(NaOPh)-prod(1,6major)</b> | -4442.25425183 | -49.0 | -23.0 | -4441.15464221 | -43.2 | -17.3 | -4440.64572347 | -39.1 | -13.1 |
| <b>AA-9d(NaOPh)-ts(1,6major)</b>   | -4442.20703033 | -19.3 | 4.6   | -4441.11533859 | -18.6 | 5.3   | -4440.60922583 | -16.2 | 7.7   |
| <b>AA-9d(NaOPh)-pc(1,6major)</b>   | -4442.21197294 | -22.4 | 0.8   | -4441.11965289 | -21.3 | 2.0   | -4440.61399771 | -19.2 | 4.1   |
| <b>9d(NaOPh)-Cu-allyl</b>          | -4442.17621217 | 0.0   | 0.0   | -4441.08572350 | 0.0   | 0.0   | -4440.58346898 | 0.0   | 0.0   |
| <b>9b(NaOPh)-Cu-allyl</b>          | -4442.17569662 | 0.0   | 0.0   | -4441.08335295 | 0.0   | 0.0   | -4440.57955401 | 0.0   | 0.0   |
| <b>AA-9b(NaOPh)-pc(1,6major)</b>   | -4442.20571405 | -18.8 | 1.1   | -4441.11106454 | -17.4 | 2.6   | -4440.60279951 | -14.6 | 5.4   |
| <b>AA-9b(NaOPh)-ts(1,6major)</b>   | -4442.20131098 | -16.1 | 6.3   | -4441.10769971 | -15.3 | 7.1   | -4440.59922567 | -12.3 | 10.0  |
| <b>AA-9b(NaOPh)-prod(1,6major)</b> | -4442.24761702 | -45.1 | -20.1 | -4441.14554836 | -39.0 | -14.0 | -4440.63636545 | -35.6 | -10.6 |
| <b>AA-9d(NaOPh)-prod(1,6minor)</b> | -4442.24538245 | -43.4 | -20.1 | -4441.14271630 | -35.8 | -12.5 | -4440.63526265 | -32.5 | -9.2  |
| <b>AA-9d(NaOPh)-ts(1,6minor)</b>   | -4442.20068755 | -15.4 | 7.0   | -4441.10803999 | -14.0 | 8.4   | -4440.60092130 | -11.0 | 11.4  |
| <b>AA-9d(NaOPh)-pc(1,6minor)</b>   | -4442.20701084 | -19.3 | 2.0   | -4441.11272163 | -16.9 | 4.4   | -4440.60717458 | -14.9 | 6.5   |
| <b>9d(NaOPh)-Cu-allyl</b>          | -4442.17621217 | 0.0   | 0.0   | -4441.08572350 | 0.0   | 0.0   | -4440.58346898 | 0.0   | 0.0   |
| <b>9b(NaOPh)-Cu-allyl</b>          | -4442.17569662 | 0.0   | 0.0   | -4441.08335295 | 0.0   | 0.0   | -4440.57955401 | 0.0   | 0.0   |
| <b>AA-9b(NaOPh)-pc(1,6minor)</b>   | -4442.20252596 | -16.8 | 5.8   | -4441.10766838 | -15.3 | 7.4   | -4440.59964701 | -12.6 | 10.0  |
| <b>AA-9b(NaOPh)-ts(1,6minor)</b>   | -4442.19924457 | -14.8 | 6.7   | -4441.10534786 | -13.8 | 7.6   | -4440.59570571 | -10.1 | 11.3  |
| <b>AA-9b(NaOPh)-prod(1,6minor)</b> | -4134.71087898 | -45.7 | -19.3 | -4133.72848179 | -38.1 | -11.7 | -4133.24493202 | -34.6 | -8.2  |

**Figure S4-1**

|                                 |                |       |       |                |       |       |                |       |      |
|---------------------------------|----------------|-------|-------|----------------|-------|-------|----------------|-------|------|
| <b>PA-9d(Na)-prod(1,6major)</b> | -3683.39784182 | -41.9 | -18.9 | -3682.59738631 | -36.4 | -13.5 | -3682.19185658 | -31.2 | -8.3 |
| <b>PA-9d(Na)-ts(1,6major)</b>   | -3683.34637627 | -9.6  | 10.0  | -3682.55204777 | -8.0  | 11.5  | -3682.14838128 | -3.9  | 15.6 |
| <b>PA-9d(Na)-pc(1,6major)</b>   | -3683.36321378 | -20.1 | -0.4  | -3682.56636861 | -17.0 | 2.8   | -3682.16499630 | -14.3 | 5.4  |
| <b>9d(Na)-Cu-allenyl</b>        | -3683.33114499 | 0.0   | 0.0   | -3682.53933632 | 0.0   | 0.0   | -3682.14215505 | 0.0   | 0.0  |
| <b>9b(Na)-Cu-allenyl</b>        | -3683.33122166 | 0.0   | 0.0   | -3682.53742270 | 0.0   | 0.0   | -3682.13953768 | 0.0   | 0.0  |
| <b>PA-9b(Na)-pc(1,6major)</b>   | -3683.35560070 | -15.3 | 2.6   | -3682.55836100 | -13.1 | 4.8   | -3682.15725021 | -11.1 | 6.8  |
| <b>PA-9b(Na)-ts(1,6major)</b>   | -3683.34236298 | -7.0  | 11.0  | -3682.54822576 | -6.8  | 11.2  | -3682.14321630 | -2.3  | 15.6 |
| <b>PA-9b(Na)-prod(1,6major)</b> | -3683.39313924 | -38.9 | -18.7 | -3682.59320296 | -35.0 | -14.9 | -3682.18528563 | -28.7 | -8.6 |

|                                 |                |       |       |                |       |       |                |       |       |
|---------------------------------|----------------|-------|-------|----------------|-------|-------|----------------|-------|-------|
| <b>PA-9d(Na)-prod(1,6minor)</b> | -3683.40031948 | -43.4 | -21.2 | -3682.59965810 | -37.9 | -15.6 | -3682.19462082 | -32.9 | -10.7 |
| <b>PA-9d(Na)-ts(1,6minor)</b>   | -3683.34306318 | -7.5  | 11.3  | -3682.54933664 | -6.3  | 12.5  | -3682.14702419 | -3.1  | 15.7  |
| <b>PA-9d(Na)-pc(1,6minor)</b>   | -3683.35945929 | -17.8 | 1.0   | -3682.56156905 | -14.0 | 4.8   | -3682.16240876 | -12.7 | 6.1   |
| <b>9d(Na)-Cu-allenyl</b>        | -3683.33114499 | 0.0   | 0.0   | -3682.53933632 | 0.0   | 0.0   | -3682.14215505 | 0.0   | 0.0   |
| <b>9b(Na)-Cu-allenyl</b>        | -3683.33122166 | 0.0   | 0.0   | -3682.53742270 | 0.0   | 0.0   | -3682.13953768 | 0.0   | 0.0   |
| <b>PA-9b(Na)-pc(1,6minor)</b>   | -3683.35359137 | -14.0 | 4.5   | -3682.55654715 | -12.0 | 6.5   | -3682.15477881 | -9.6  | 9.0   |
| <b>PA-9b(Na)-ts(1,6minor)</b>   | -3683.33654017 | -3.3  | 17.4  | -3682.54299270 | -3.5  | 17.2  | -3682.13718221 | 1.5   | 22.2  |
| <b>PA-9b(Na)-prod(1,6minor)</b> | -3683.38759741 | -35.4 | -15.2 | -3682.58775481 | -31.6 | -11.4 | -3682.17978765 | -25.3 | -5.0  |

## Figure S5-1

|                                 |                |       |       |                |       |       |                |       |       |
|---------------------------------|----------------|-------|-------|----------------|-------|-------|----------------|-------|-------|
| <b>AA-9d(Na)-prod(1,6major)</b> | -4134.70550277 | -40.3 | -14.5 | -4133.72532266 | -33.4 | -7.6  | -4133.24320321 | -30.6 | -4.9  |
| <b>AA-9d(Na)-ts(1,6major)</b>   | -4134.65947596 | -11.4 | 9.6   | -4133.68817393 | -10.1 | 10.9  | -4133.20733197 | -8.1  | 12.9  |
| <b>AA-9d(Na)-pc(1,6major)</b>   | -4134.66659548 | -15.9 | 6.2   | -4133.69397273 | -13.7 | 8.3   | -4133.21435381 | -12.5 | 9.5   |
| <b>9d(Na)-Cu-allyl</b>          | -4134.64133271 | 0.0   | 0.0   | -4133.67213363 | 0.0   | 0.0   | -4133.19437368 | 0.0   | 0.0   |
| <b>9b(Na)-Cu-allyl</b>          | -4134.63799627 | 0.0   | 0.0   | -4133.66778602 | 0.0   | 0.0   | -4133.18981887 | 0.0   | 0.0   |
| <b>AA-9b(Na)-pc(1,6major)</b>   | -4134.66235872 | -15.3 | 6.5   | -4133.68882459 | -13.2 | 8.6   | -4133.20729302 | -11.0 | 10.8  |
| <b>AA-9b(Na)-ts(1,6major)</b>   | -4134.65804731 | -12.6 | 10.1  | -4133.68556131 | -11.2 | 11.5  | -4133.20353635 | -8.6  | 14.1  |
| <b>AA-9b(Na)-prod(1,6major)</b> | -4134.70719414 | -43.4 | -18.2 | -4133.72597427 | -36.5 | -11.3 | -4133.24218952 | -32.9 | -7.7  |
| <b>AA-9d(Na)-prod(1,6minor)</b> | -4134.71098644 | -43.7 | -22.7 | -4133.73005127 | -36.3 | -15.3 | -4133.24743867 | -33.3 | -12.3 |
| <b>AA-9d(Na)-ts(1,6minor)</b>   | -4134.65544875 | -8.9  | 13.1  | -4133.68404505 | -7.5  | 14.5  | -4133.20411140 | -6.1  | 15.9  |
| <b>AA-9d(Na)-pc(1,6minor)</b>   | -4134.66379593 | -14.1 | 6.6   | -4133.69023515 | -11.4 | 9.4   | -4133.21148125 | -10.7 | 10.0  |
| <b>9d(Na)-Cu-allyl</b>          | -4134.64133271 | 0.0   | 0.0   | -4133.67213363 | 0.0   | 0.0   | -4133.19437368 | 0.0   | 0.0   |
| <b>9b(Na)-Cu-allyl</b>          | -4134.63799627 | 0.0   | 0.0   | -4133.66778602 | 0.0   | 0.0   | -4133.18981887 | 0.0   | 0.0   |
| <b>AA-9b(Na)-pc(1,6minor)</b>   | -4134.65984054 | -13.7 | 8.7   | -4133.68675858 | -11.9 | 10.5  | -4133.20263410 | -8.0  | 14.4  |
| <b>AA-9b(Na)-ts(1,6minor)</b>   | -4134.65491128 | -10.6 | 11.8  | -4133.68294647 | -9.5  | 12.9  | -4133.19814032 | -5.2  | 17.2  |
| <b>AA-9b(Na)-prod(1,6minor)</b> | -4134.71087898 | -45.7 | -19.3 | -4133.72848179 | -38.1 | -11.7 | -4133.24493202 | -34.6 | -8.2  |

## Figure S6-1

thf  
PMe3  
Me2NHC  
NaOPh  
NaOtBu  
dienoate  
dienoate-NaOPh  
dienoate-NaOtBu

|                     |                |       |       |                |       |       |                |       |       |
|---------------------|----------------|-------|-------|----------------|-------|-------|----------------|-------|-------|
| Me2NHC-Cu-allenyl   | -3068.82928331 | -8.5  | -7.6  | -3068.30875957 | -9.5  | -8.6  | -3067.96232859 | -8.6  | -7.7  |
| PMe3-Cu-allenyl     | -3068.81575877 | 0.0   | 0.0   | -3068.29363839 | 0.0   | 0.0   | -3067.94866008 | 0.0   | 0.0   |
| thf-Cu-allenyl      | -3068.79103206 | 15.5  | 15.7  | -3068.26934047 | 15.2  | 15.4  | -3067.92511116 | 14.8  | 15.0  |
| PA-NaOPh-prod(1,6)  | -3068.84357882 | -17.5 | -8.3  | -3068.31679925 | -14.5 | -5.4  | -3067.96676616 | -11.4 | -2.2  |
| PA-NaOPh-ts(1,6)    | -3068.79775941 | 11.3  | 19.6  | -3068.27777257 | 10.0  | 18.2  | -3067.92987275 | 11.8  | 20.1  |
| PA-NaOPh-ed(1,6)    | -3068.81261617 | 2.0   | 9.2   | -3068.29038779 | 2.0   | 9.2   | -3067.94511397 | 2.2   | 9.4   |
| NaOPh-Cu-allenyl    | -3068.78025160 | 22.3  | 11.4  | -3068.26060579 | 20.7  | 9.9   | -3067.91360817 | 22.0  | 11.2  |
| PA-NaOPh-ed(1,4)    | -3068.82290138 | -4.5  | 3.9   | -3068.29954852 | -3.7  | 4.6   | -3067.95120914 | -1.6  | 6.8   |
| PA-NaOPh-ts(1,4)    | -3068.79414584 | 13.6  | 21.2  | -3068.27565479 | 11.3  | 18.9  | -3067.92589394 | 14.3  | 21.9  |
| PA-NaOPh-prod(1,4)  | -3068.84931260 | -21.1 | -11.7 | -3068.32203973 | -17.8 | -8.4  | -3067.97196924 | -14.6 | -5.2  |
| Me2NHC-Cu-allenyl   | -2995.01744986 | -8.5  | -7.6  | -2994.51396505 | -9.5  | -8.6  | -2994.14163588 | -8.6  | -7.7  |
| PMe3-Cu-allenyl     | -2995.00392532 | 0.0   | 0.0   | -2994.49884387 | 0.0   | 0.0   | -2994.12796737 | 0.0   | 0.0   |
| thf-Cu-allenyl      | -2994.97919861 | 15.5  | 15.7  | -2994.47454595 | 15.2  | 15.4  | -2994.10441845 | 14.8  | 15.0  |
| PA-NaOtBu-prod(1,6) | -2995.04688960 | -27.0 | -17.9 | -2994.53633318 | -23.5 | -14.5 | -2994.15898795 | -19.5 | -10.4 |
| PA-NaOtBu-ts(1,6)   | -2995.00077189 | 2.0   | 8.9   | -2994.49872442 | 0.1   | 7.0   | -2994.12179243 | 3.9   | 10.8  |
| PA-NaOtBu-ed(1,6)   | -2995.01655294 | -7.9  | -2.5  | -2994.51153622 | -8.0  | -2.5  | -2994.13816262 | -6.4  | -0.9  |
| NaOtBu-Cu-allenyl   | -2994.98718705 | 10.5  | 0.4   | -2994.48472280 | 8.9   | -1.3  | -2994.11010278 | 11.2  | 1.1   |
| PA-NaOtBu-ed(1,4)   | -2995.02081716 | -10.6 | -6.4  | -2994.51666040 | -11.2 | -7.0  | -2994.14196351 | -8.8  | -4.6  |
| PA-NaOtBu-ts(1,4)   | -2994.99895360 | 3.1   | 7.4   | -2994.49779724 | 0.7   | 4.9   | -2994.12084986 | 4.5   | 8.7   |
| PA-NaOtBu-prod(1,4) | -2995.05428820 | -31.6 | -22.7 | -2994.54421081 | -28.5 | -19.5 | -2994.16668659 | -24.3 | -15.4 |

## Figure S7-1

|                          |                |       |       |                |       |      |                |       |      |
|--------------------------|----------------|-------|-------|----------------|-------|------|----------------|-------|------|
| Me2NHC-Cu-allyl          | -3356.90190046 | 0.0   | 0.0   | -3356.19082586 | 0.0   | 0.0  | -3355.76947919 | 0.0   | 0.0  |
| AA-Me2NHC-pc(1,6major)   | -3356.92173542 | -12.4 | 5.5   | -3356.20596661 | -9.5  | 8.5  | -3355.78294379 | -8.4  | 9.5  |
| AA-Me2NHC-ts(1,6major)   | -3356.91107985 | -5.8  | 14.2  | -3356.19684095 | -3.8  | 16.2 | -3355.77271369 | -2.0  | 17.9 |
| AA-Me2NHC-prod(1,6major) | -3356.96212920 | -37.8 | -14.5 | -3356.23841491 | -29.9 | -6.6 | -3355.81382406 | -27.8 | -4.5 |
| Me2NHC-Cu-allyl          | -3356.90190046 | 0.0   | 0.0   | -3356.19082586 | 0.0   | 0.0  | -3355.76947919 | 0.0   | 0.0  |
| AA-Me2NHC-pc(1,6minor)   | -3356.92018482 | -11.5 | 7.9   | -3356.20198203 | -7.0  | 12.4 | -3355.77885671 | -5.9  | 13.5 |
| AA-Me2NHC-ts(1,6minor)   | -3356.90184702 | 0.0   | 20.1  | -3356.18737922 | 2.2   | 22.2 | -3355.76151812 | 5.0   | 25.0 |
| AA-Me2NHC-prod(1,6minor) | -3356.95475893 | -33.2 | -10.1 | -3356.23307270 | -26.5 | -3.4 | -3355.80524014 | -22.4 | 0.7  |

## Figure S8-1

|                  |                |      |      |                |      |      |                |      |      |
|------------------|----------------|------|------|----------------|------|------|----------------|------|------|
| dienoate         |                |      |      |                |      |      |                |      |      |
| SIMes-Cu-allenyl | -3525.02126270 | 0.0  | 0.0  | -3524.19135955 | 0.0  | 0.0  | -3523.82072108 | 0.0  | 0.0  |
| PA-SIMes-ed(1,6) | -3525.03501217 | -8.6 | 12.6 | -3524.20038963 | -5.7 | 15.5 | -3523.82534428 | -2.9 | 18.3 |

|                       |                |       |      |                |       |      |                |       |      |
|-----------------------|----------------|-------|------|----------------|-------|------|----------------|-------|------|
| PA-SIMes-ts(1,6)      | -3525.01599756 | 3.3   | 24.4 | -3524.18482097 | 4.1   | 25.2 | -3523.80541778 | 9.6   | 30.7 |
| PA-SIMes-prod(1,6)    | -3525.06427418 | -27.0 | -3.9 | -3524.22735126 | -22.6 | 0.5  | -3523.84759504 | -16.9 | 6.2  |
| PA-SIMes-ed(1,4AA)    | -3525.03504845 | -8.7  | 12.4 | -3524.20050687 | -5.7  | 15.4 | -3523.82539531 | -2.9  | 18.2 |
| PA-SIMes-ts(1,4AA)    | -3525.00671358 | 9.1   | 29.4 | -3524.17318282 | 11.4  | 31.7 | -3523.79494539 | 16.2  | 36.4 |
| PA-SIMes-prod(1,4AA)  | -3525.05252178 | -19.6 | -0.1 | -3524.21507413 | -14.9 | 4.6  | -3523.83664071 | -10.0 | 9.5  |
| PA-SIMes-ed(1,4)      | -3525.03218345 | -6.9  | 11.9 | -3524.20020482 | -5.6  | 13.2 | -3523.82592051 | -3.3  | 15.5 |
| PA-SIMes-ts(1,4)      | -3524.99957892 | 13.6  | 30.9 | -3524.17009122 | 13.3  | 30.6 | -3523.79443209 | 16.5  | 33.8 |
| PA-SIMes-prod(1,4)    | -3525.03760248 | -10.3 | 11.3 | -3524.19790947 | -4.1  | 17.4 | -3523.82447708 | -2.4  | 19.2 |
| PPh3-Cu-allenyl       | -3635.89081165 | 0.0   | 0.0  | -3635.15239600 | 0.0   | 0.0  | -3634.82371919 | 0.0   | 0.0  |
| PA-PPh3-ed(1,6)       | -3635.90023076 | -5.9  | 11.6 | -3635.15826545 | -3.7  | 13.8 | -3634.82650137 | -1.7  | 15.8 |
| PA-PPh3-ts(1,6)       | -3635.87965155 | 7.0   | 26.0 | -3635.14176346 | 6.7   | 25.6 | -3634.80725567 | 10.3  | 29.3 |
| PA-PPh3-prod(1,6)     | -3635.92484797 | -21.4 | -1.3 | -3635.18101473 | -18.0 | 2.1  | -3634.84425697 | -12.9 | 7.2  |
| PA-PPh3-ed(1,4AA)     | -3635.90033582 | -6.0  | 10.2 | -3635.15969220 | -4.6  | 11.6 | -3634.82810853 | -2.8  | 13.5 |
| PA-PPh3-ts(1,4AA)     | -3635.87000911 | 13.1  | 28.8 | -3635.12933309 | 14.5  | 30.2 | -3634.79529613 | 17.8  | 33.6 |
| PA-PPh3-prod(1,4AA)   | -3635.91519247 | -15.3 | 3.2  | -3635.16950782 | -10.7 | 7.7  | -3634.83611730 | -7.8  | 10.7 |
| PA-PPh3-ed(1,4)       | -3635.89704236 | -3.9  | 11.7 | -3635.15683178 | -2.8  | 12.8 | -3634.82662491 | -1.8  | 13.8 |
| PA-PPh3-ts(1,4)       | -3635.86619047 | 15.5  | 30.4 | -3635.12930261 | 14.5  | 29.4 | -3634.79877876 | 15.7  | 30.6 |
| PA-PPh3-prod(1,4)     | -3635.92832707 | -23.5 | -5.0 | -3635.18111023 | -18.0 | 0.5  | -3634.85193029 | -17.7 | 0.8  |
| <b>Figures S9-1</b>   |                |       |      |                |       |      |                |       |      |
| Me2NHC-Cu-allenyl     | -2905.61065891 | 0.0   | 0.0  | -2905.07228030 | 0.0   | 0.0  | -2904.73008855 | 0.0   | 0.0  |
| PA-Me2NHC-ed(1,6)     | -2905.61551037 | -3.0  | 14.9 | -2905.07542739 | -2.0  | 15.9 | -2904.73109735 | -0.6  | 17.3 |
| PA-Me2NHC-ts(1,6)     | -2905.59596441 | 9.2   | 27.2 | -2905.05971940 | 7.9   | 25.8 | -2904.71160347 | 11.6  | 29.6 |
| PA-Me2NHC-prod(1,6)   | -2905.64614630 | -22.3 | -0.3 | -2905.10183379 | -18.5 | 3.4  | -2904.75269112 | -14.2 | 7.7  |
| PA-Me2NHC-ed(1,4AA)   | -2905.61763066 | -4.4  | 11.9 | -2905.07519052 | -1.8  | 14.4 | -2904.73270474 | -1.6  | 14.6 |
| PA-Me2NHC-ts(1,4AA)   | -2905.58445465 | 16.4  | 32.1 | -2905.04452805 | 17.4  | 33.1 | -2904.69753498 | 20.4  | 36.1 |
| PA-Me2NHC-prod(1,4AA) | -2905.63888257 | -17.7 | -2.0 | -2905.09464210 | -14.0 | 1.6  | -2904.74843178 | -11.5 | 4.2  |
| PA-Me2NHC-ed(1,4)     | -2905.61283807 | -1.4  | 13.6 | -2905.07352500 | -0.8  | 14.2 | -2904.73109017 | -0.6  | 14.4 |
| PA-Me2NHC-ts(1,4)     | -2905.58205030 | 18.0  | 34.1 | -2905.04548147 | 16.8  | 32.9 | -2904.70011167 | 18.8  | 34.9 |
| PA-Me2NHC-prod(1,4)   | -2905.62000587 | -5.9  | 12.6 | -2905.07362957 | -0.8  | 17.6 | -2904.73069935 | -0.4  | 18.0 |
| PMe3-Cu-allenyl       | -3060.68423543 | 0.0   | 0.0  | -3060.18986551 | 0.0   | 0.0  | -3059.84008469 | 0.0   | 0.0  |
| PA-PMe3-ed(1,6)       | -3060.69567408 | -7.2  | 9.9  | -3060.20020876 | -6.5  | 10.6 | -3059.84827443 | -5.1  | 11.9 |
| PA-PMe3-ts(1,6)       | -3060.67410433 | 6.4   | 24.4 | -3060.18241140 | 4.7   | 22.7 | -3059.82686972 | 8.3   | 26.3 |

|                     |                |       |      |                |       |      |                |       |      |
|---------------------|----------------|-------|------|----------------|-------|------|----------------|-------|------|
| PA-PMe3-prod(1,6)   | -3060.71995989 | -22.4 | -2.8 | -3060.22063684 | -19.3 | 0.3  | -3059.86445362 | -15.3 | 4.4  |
| PA-PMe3-ed(1,4AA)   | -3060.69567408 | -7.2  | 9.9  | -3060.20020883 | -6.5  | 10.6 | -3059.84827450 | -5.1  | 11.9 |
| PA-PMe3-ts(1,4AA)   | -3060.65934538 | 15.6  | 31.7 | -3060.16495629 | 15.6  | 31.7 | -3059.81004673 | 18.8  | 34.9 |
| PA-PMe3-prod(1,4AA) | -3060.70755126 | -14.6 | 2.8  | -3060.20738444 | -11.0 | 6.4  | -3059.85362578 | -8.5  | 8.9  |
| PA-PMe3-ed(1,4)     | -3060.69092142 | -4.2  | 11.9 | -3060.19712988 | -4.6  | 11.5 | -3059.84600211 | -3.7  | 12.4 |
| PA-PMe3-ts(1,4)     | -3060.66021586 | 15.1  | 30.2 | -3060.16917418 | 13.0  | 28.1 | -3059.81631528 | 14.9  | 30.0 |
| PA-PMe3-prod(1,4)   | -3060.72052409 | -22.8 | -2.2 | -3060.22224154 | -20.3 | 0.3  | -3059.86453791 | -15.3 | 5.2  |

Figure S10-1

## dienoate

## dienoate-Naborate

|                                |                |       |       |                |       |      |                |       |      |
|--------------------------------|----------------|-------|-------|----------------|-------|------|----------------|-------|------|
| SIMes-Cu-allenyl               | -4170.57644708 | 0.0   | 0.0   | -4169.62279097 | 0.0   | 0.0  | -4169.14720784 | 0.0   | 0.0  |
| PA-SIMes(Naborate)-ed(1,6)     | -4170.60154244 | -15.7 | 7.2   | -4169.64006692 | -10.8 | 12.1 | -4169.15833641 | -7.0  | 16.0 |
| PA-SIMes(Naborate)-ts(1,6)     | -4170.58902765 | -7.9  | 14.3  | -4169.62994310 | -4.5  | 17.7 | -4169.14555865 | 1.0   | 23.2 |
| PA-SIMes(Naborate)-prod(1,6)   | -4170.64124287 | -40.7 | -17.1 | -4169.67605831 | -33.4 | -9.9 | -4169.18979225 | -26.7 | -3.2 |
| PA-SIMes(Naborate)-ed(1,4AA)   | -4170.59982759 | -14.7 | 7.1   | -4169.63780212 | -9.4  | 12.4 | -4169.15577160 | -5.4  | 16.4 |
| PA-SIMes(Naborate)-ts(1,4AA)   | -4170.58199140 | -3.5  | 17.1  | -4169.62031454 | 1.6   | 22.2 | -4169.13725708 | 6.2   | 26.9 |
| PA-SIMes(Naborate)-prod(1,4AA) | -4170.62959750 | -33.4 | -11.2 | -4169.66275344 | -25.1 | -3.0 | -4169.17942681 | -20.2 | 1.9  |
| PA-SIMes(Naborate)-ed(1,4)     | -4170.60383364 | -17.2 | 4.4   | -4169.64114501 | -11.5 | 10.0 | -4169.15938207 | -7.6  | 13.9 |
| PA-SIMes(Naborate)-ts(1,4)     | -4170.57418227 | 1.4   | 22.0  | -4169.61385891 | 5.6   | 26.2 | -4169.13131782 | 10.0  | 30.6 |
| PA-SIMes(Naborate)-prod(1,4)   | -4170.63212445 | -34.9 | -11.7 | -4169.66493164 | -26.4 | -3.2 | -4169.18108052 | -21.3 | 2.0  |

## dienoate

## dienoate-Naborate

|                               |                |       |       |                |       |       |                |       |      |
|-------------------------------|----------------|-------|-------|----------------|-------|-------|----------------|-------|------|
| PPh3-Cu-allenyl               | -4281.44599603 | 0.0   | 0.0   | -4280.58382742 | 0.0   | 0.0   | -4280.15020595 | 0.0   | 0.0  |
| PA-PPh3(Naborate)-ed(1,6)     | -4281.46746198 | -13.5 | 6.3   | -4280.59890883 | -9.5  | 10.3  | -4280.16102512 | -6.8  | 13.0 |
| PA-PPh3(Naborate)-ts(1,6)     | -4281.45382085 | -4.9  | 14.6  | -4280.58875865 | -3.1  | 16.4  | -4280.14728851 | 1.8   | 21.3 |
| PA-PPh3(Naborate)-prod(1,6)   | -4281.50836163 | -39.1 | -16.7 | -4280.63634687 | -33.0 | -10.5 | -4280.19118616 | -25.7 | -3.3 |
| PA-PPh3(Naborate)-ed(1,4AA)   | -4281.46812950 | -13.9 | 3.3   | -4280.60217750 | -11.5 | 5.7   | -4280.16424940 | -8.8  | 8.4  |
| PA-PPh3(Naborate)-ts(1,4AA)   | -4281.43958118 | 4.0   | 19.1  | -4280.57140524 | 7.8   | 22.9  | -4280.13367614 | 10.4  | 25.4 |
| PA-PPh3(Naborate)-prod(1,4AA) | -4281.49279310 | -29.4 | -12.8 | -4280.61881368 | -22.0 | -5.4  | -4280.18126052 | -19.5 | -3.0 |
| PA-PPh3(Naborate)-ed(1,4)     | -4281.47138378 | -15.9 | 0.8   | -4280.60207454 | -11.5 | 5.3   | -4280.16316545 | -8.1  | 8.6  |
| PA-PPh3(Naborate)-ts(1,4)     | -4281.44141220 | 2.9   | 21.0  | -4280.57475036 | 5.7   | 23.8  | -4280.13513113 | 9.5   | 27.5 |
| PA-PPh3(Naborate)-prod(1,4)   | -4281.50805388 | -38.9 | -15.6 | -4280.63518412 | -32.2 | -8.9  | -4280.19023961 | -25.1 | -1.8 |



| Figure S11-1             |                |       |       |                |       |       |                |       |       |
|--------------------------|----------------|-------|-------|----------------|-------|-------|----------------|-------|-------|
| <b>dienoate</b>          |                |       |       |                |       |       |                |       |       |
| PA-9d(Na)-prod(1,6major) | -3683.39784182 | -41.9 | -18.9 | -3682.59738631 | -36.4 | -13.5 | -3682.19185658 | -31.2 | -8.3  |
| PA-9d(Na)-ts(1,6major)   | -3683.34637627 | -9.6  | 10.0  | -3682.55204777 | -8.0  | 11.5  | -3682.14838128 | -3.9  | 15.6  |
| PA-9d(Na)-pc(1,6major)   | -3683.36321378 | -20.1 | -0.4  | -3682.56636861 | -17.0 | 2.8   | -3682.16499630 | -14.3 | 5.4   |
| 9d(Na)-Cu-allenyl        | -3683.33114499 | 0.0   | 0.0   | -3682.53933632 | 0.0   | 0.0   | -3682.14215505 | 0.0   | 0.0   |
| PA-9d(Na)-pc(1,4AA)      | -3683.35966006 | -17.9 | 0.8   | -3682.56283640 | -14.7 | 4.0   | -3682.16370288 | -13.5 | 5.2   |
| PA-9d(Na)-ts(1,4AA)      | -3683.33219811 | -0.7  | 16.8  | -3682.53782334 | 0.9   | 18.4  | -3682.13545302 | 4.2   | 21.7  |
| PA-9d(Na)-prod(1,4AA)    | -3683.39331473 | -39.0 | -20.8 | -3682.59217563 | -33.2 | -14.9 | -3682.19295841 | -31.9 | -13.7 |

| Figure S12-1               |                |       |       |                |       |       |                |       |       |
|----------------------------|----------------|-------|-------|----------------|-------|-------|----------------|-------|-------|
| <b>NaOtBu<br/>dienoate</b> |                |       |       |                |       |       |                |       |       |
| PA-SIMes(NaOtBu)-prod(1,4) | -2682.26036288 | -42.9 | -23.9 | -2681.68866579 | -39.4 | -20.4 | -2681.41224991 | -38.5 | -19.5 |
| PA-SIMes(NaOtBu)-ts(1,4)   | -2682.17841192 | 8.6   | 26.5  | -2681.61636955 | 6.0   | 24.0  | -2681.33795643 | 8.1   | 26.1  |
| PA-SIMes(NaOtBu)-ed(1,4)   | -2682.20840072 | -10.3 | 7.4   | -2681.64342161 | -11.0 | 6.7   | -2681.36713021 | -10.2 | 7.4   |
| SIMes-Cu-allenyl           | -2682.15378194 | 24.0  | 5.7   | -2681.59626512 | 18.6  | 0.3   | -2681.32394289 | 16.9  | -1.5  |
| SIMes-Cu(NaOtBu)-allenyl   | -2682.19206462 | 0.0   | 0.0   | -2681.62592745 | 0.0   | 0.0   | -2681.35083456 | 0.0   | 0.0   |
| PA-SIMes(NaOtBu)-ed(1,6)   | -2682.20484762 | -8.0  | 10.5  | -2681.63786848 | -7.5  | 11.0  | -2681.36069832 | -6.2  | 12.3  |
| PA-SIMes(NaOtBu)-ts(1,6)   | -2682.19215840 | -0.1  | 17.6  | -2681.62787391 | -1.2  | 16.5  | -2681.34747993 | 2.1   | 19.8  |
| PA-SIMes(NaOtBu)-prod(1,6) | -2682.24539528 | -33.5 | -14.9 | -2681.67467793 | -30.6 | -12.1 | -2681.39195407 | -25.8 | -7.3  |
| PA-PPh3(NaOtBu)-prod(1,4)  | -2793.12770822 | -40.6 | -17.4 | -2792.65029930 | -36.9 | -13.8 | -2792.40656300 | -30.3 | -7.2  |
| PA-PPh3(NaOtBu)-ts(1,4)    | -2793.07132615 | -5.2  | 13.4  | -2792.60168576 | -6.4  | 12.2  | -2792.36294430 | -3.0  | 15.6  |
| PA-PPh3(NaOtBu)-ed(1,4)    | -2793.09449946 | -19.7 | 0.1   | -2792.61889716 | -17.2 | 2.6   | -2792.38121552 | -14.4 | 5.4   |
| PPh3-Cu-allenyl            | -2793.02333089 | 24.9  | 9.2   | -2792.55730157 | 21.5  | 5.8   | -2792.32694100 | 19.6  | 3.9   |
| PPh3-Cu(NaOtBu)-allenyl    | -2793.06304992 | 0.0   | 0.0   | -2792.59153231 | 0.0   | 0.0   | -2792.35821531 | 0.0   | 0.0   |
| PA-PPh3(NaOtBu)-ed(1,6)    | -2793.07243155 | -5.9  | 12.0  | -2792.59919364 | -4.8  | 13.1  | -2792.36546539 | -4.5  | 13.3  |
| PA-PPh3(NaOtBu)-ts(1,6)    | -2793.05860435 | 2.8   | 22.2  | -2792.58841354 | 2.0   | 21.3  | -2792.35111405 | 4.5   | 23.8  |
| PA-PPh3(NaOtBu)-prod(1,6)  | -2793.11322554 | -31.5 | -10.7 | -2792.63583254 | -27.8 | -7.1  | -2792.39454951 | -22.8 | -2.1  |

| Figure S13-1 |  |  |  |  |  |  |  |  |  |
|--------------|--|--|--|--|--|--|--|--|--|
|--------------|--|--|--|--|--|--|--|--|--|

|                                    |                |       |       |                |       |       |                |       |       |
|------------------------------------|----------------|-------|-------|----------------|-------|-------|----------------|-------|-------|
| <b>NaOMe</b>                       |                |       |       |                |       |       |                |       |       |
| <b>dienoate</b>                    |                |       |       |                |       |       |                |       |       |
| <b>PA-SIMes(NaOMe)-prod(1,4)</b>   | -2682.25617022 | -43.2 | -21.8 | -2681.68012460 | -35.3 | -13.9 | -2681.40394301 | -34.3 | -12.9 |
| <b>PA-SIMes(NaOMe)-ts(1,4)</b>     | -2682.17655336 | 6.8   | 25.3  | -2681.61576620 | 5.0   | 23.5  | -2681.33902998 | 6.5   | 24.9  |
| <b>PA-SIMes(NaOMe)-ed(1,4)</b>     | -2682.20446296 | -10.7 | 7.9   | -2681.63854656 | -9.3  | 9.4   | -2681.36379706 | -9.1  | 9.6   |
| <b>SIMes-Cu-allenyl</b>            | -2682.15378194 | 21.1  | 5.6   | -2681.59626512 | 17.3  | 1.8   | -2681.32394289 | 15.9  | 0.4   |
| <b>SIMes-Cu(NaOMe)-allenyl</b>     | -2682.18738500 | 0.0   | 0.0   | -2681.62380065 | 0.0   | 0.0   | -2681.34934568 | 0.0   | 0.0   |
| <b>PA-SIMes(NaOMe)-ed(1,6)</b>     | -2682.20339526 | -10.0 | 8.2   | -2681.63765084 | -8.7  | 9.5   | -2681.36086340 | -7.2  | 11.0  |
| <b>PA-SIMes(NaOMe)-ts(1,6)</b>     | -2682.19104064 | -2.3  | 17.6  | -2681.62733751 | -2.2  | 17.7  | -2681.34791937 | 0.9   | 20.8  |
| <b>PA-SIMes(NaOMe)-prod(1,6)</b>   | -2682.24424038 | -35.7 | -15.7 | -2681.67407351 | -31.5 | -11.5 | -2681.39231903 | -27.0 | -7.0  |
| <b>PA-PPh3(NaOMe)-prod(1,4)</b>    | -2793.12465662 | -40.2 | -17.4 | -2792.64975877 | -36.5 | -13.7 | -2792.40857725 | -31.5 | -8.8  |
| <b>PA-PPh3(NaOMe)-ts(1,4)</b>      | -2793.06720052 | -4.1  | 13.9  | -2792.59782985 | -3.9  | 14.1  | -2792.36105713 | -1.7  | 16.4  |
| <b>PA-PPh3(NaOMe)-ed(1,4)</b>      | -2793.08865104 | -17.6 | 1.9   | -2792.61496002 | -14.7 | 4.8   | -2792.37950844 | -13.3 | 6.2   |
| <b>PPh3-Cu-allenyl</b>             | -2793.02333089 | 23.4  | 9.7   | -2792.55730157 | 21.5  | 7.8   | -2792.32694100 | 19.7  | 6.0   |
| <b>PPh3-Cu(NaOMe)-allenyl</b>      | -2793.06061324 | 0.0   | 0.0   | -2792.59157425 | 0.0   | 0.0   | -2792.35832675 | 0.0   | 0.0   |
| <b>PA-PPh3(NaOMe)-ed(1,6)</b>      | -2793.06855993 | -5.0  | 11.8  | -2792.59628875 | -3.0  | 13.9  | -2792.36318959 | -3.1  | 13.8  |
| <b>PA-PPh3(NaOMe)-ts(1,6)</b>      | -2793.05422433 | 4.0   | 22.0  | -2792.58395105 | 4.8   | 22.7  | -2792.34849634 | 6.2   | 24.1  |
| <b>PA-PPh3(NaOMe)-prod(1,6)</b>    | -2793.10829534 | -29.9 | -9.3  | -2792.63255995 | -25.7 | -5.1  | -2792.39292060 | -21.7 | -1.1  |
| <b>Figure S14-1</b>                |                |       |       |                |       |       |                |       |       |
| <b>NaOtBu</b>                      |                |       |       |                |       |       |                |       |       |
| <b>dienoate</b>                    |                |       |       |                |       |       |                |       |       |
| <b>PA-Me2NHC(NaOtBu)-prod(1,4)</b> | -2062.84417434 | -47.2 | -27.2 | -2062.56695032 | -43.1 | -23.1 | -2062.31847525 | -42.1 | -22.2 |
| <b>PA-Me2NHC(NaOtBu)-ts(1,4)</b>   | -2062.77041845 | -0.9  | 16.0  | -2062.50191206 | -2.3  | 14.6  | -2062.25229522 | -0.6  | 16.2  |
| <b>PA-Me2NHC(NaOtBu)-ed(1,4)</b>   | -2062.79019327 | -13.3 | 4.8   | -2062.51687665 | -11.7 | 6.4   | -2062.26891368 | -11.0 | 7.0   |
| <b>Me2NHC-Cu-allenyl</b>           | -2062.74316302 | 16.2  | -0.6  | -2062.47724548 | 13.2  | -3.6  | -2062.23330198 | 11.3  | -5.5  |
| <b>Me2NHC-Cu(NaOtBu)-allenyl</b>   | -2062.76898754 | 0.0   | 0.0   | -2062.49828566 | 0.0   | 0.0   | -2062.25132722 | 0.0   | 0.0   |
| <b>PA-Me2NHC(NaOtBu)-ed(1,6)</b>   | -2062.79041117 | -13.4 | 2.2   | -2062.51735490 | -12.0 | 3.6   | -2062.26992510 | -11.7 | 3.9   |
| <b>PA-Me2NHC(NaOtBu)-ts(1,6)</b>   | -2062.77449941 | -3.5  | 13.7  | -2062.50494956 | -4.2  | 13.0  | -2062.25382814 | -1.6  | 15.6  |
| <b>PA-Me2NHC(NaOtBu)-prod(1,6)</b> | -2062.82670228 | -36.2 | -16.4 | -2062.54923506 | -32.0 | -12.2 | -2062.29766014 | -29.1 | -9.3  |
| <b>PA-PMe3(NaOtBu)-prod(1,4)</b>   | -2217.91670257 | -40.0 | -16.2 | -2217.68197015 | -34.5 | -10.7 | -2217.42437067 | -32.5 | -8.7  |
| <b>PA-PMe3(NaOtBu)-ts(1,4)</b>     | -2217.85468265 | -1.1  | 16.7  | -2217.63198737 | -3.1  | 14.7  | -2217.37269734 | -0.1  | 17.7  |

|                           |                |       |      |                |       |      |                |       |      |
|---------------------------|----------------|-------|------|----------------|-------|------|----------------|-------|------|
| PA-PMe3(NaOtBu)-cd(1,4)   | -2217.87387324 | -13.2 | 4.6  | -2217.64573863 | -11.8 | 6.0  | -2217.38862406 | -10.1 | 7.7  |
| PMe3-Cu-allenyl           | -2217.81675467 | 22.7  | 8.3  | -2217.59477108 | 20.2  | 5.8  | -2217.34330650 | 18.3  | 3.9  |
| PMe3-Cu(NaOtBu)-allenyl   | -2217.85291100 | 0.0   | 0.0  | -2217.62699871 | 0.0   | 0.0  | -2217.37250196 | 0.0   | 0.0  |
| PA-PMe3(NaOtBu)-cd(1,6)   | -2217.86338221 | -6.6  | 12.4 | -2217.63748046 | -6.6  | 12.4 | -2217.38011583 | -4.8  | 14.2 |
| PA-PMe3(NaOtBu)-ts(1,6)   | -2217.84491109 | 5.0   | 25.0 | -2217.62188974 | 3.2   | 23.2 | -2217.36315277 | 5.9   | 25.8 |
| PA-PMe3(NaOtBu)-prod(1,6) | -2217.89832095 | -28.5 | -7.0 | -2217.66795153 | -25.7 | -4.2 | -2217.40591267 | -21.0 | 0.5  |

## Figure S15-1

NaOPh  
dienoate

|                              |                |       |      |                |      |      |                |      |      |
|------------------------------|----------------|-------|------|----------------|------|------|----------------|------|------|
| 9d(NaOPh)-Cu-allenyl         | -3990.87058638 | 0.0   | 0.0  | -3989.95800524 | 0.0  | 0.0  | -3989.53501617 | 0.0  | 0.0  |
| PA-9d(NaOPh)-ts(1,6major)_01 | -3990.88771241 | -10.7 | 10.5 | -3989.97360811 | -9.8 | 11.5 | -3989.54407839 | -5.7 | 15.6 |
| PA-9d(NaOPh)-ts(1,6major)_02 | -3990.88781156 | -10.8 | 10.8 | -3989.97259516 | -9.2 | 12.4 | -3989.54335300 | -5.2 | 16.3 |
| PA-9d(NaOPh)-ts(1,6major)_03 | -3990.88488307 | -9.0  | 11.7 | -3989.96914226 | -7.0 | 13.7 | -3989.53864573 | -2.3 | 18.4 |
| PA-9d(NaOPh)-ts(1,6minor)_01 | -3990.88435999 | -8.6  | 11.6 | -3989.97142413 | -8.4 | 11.9 | -3989.54116499 | -3.9 | 16.4 |
| PA-9d(NaOPh)-ts(1,6minor)_02 | -3990.88435393 | -8.6  | 12.6 | -3989.96992569 | -7.5 | 13.8 | -3989.53991742 | -3.1 | 18.2 |
| PA-9d(NaOPh)-ts(1,6minor)_03 | -3990.88433659 | -8.6  | 13.1 | -3989.96989725 | -7.5 | 14.2 | -3989.53987600 | -3.0 | 18.7 |
| PA-9d(NaOPh)-ts(1,6minor)_04 | -3990.88031711 | -6.1  | 14.8 | -3989.96747449 | -5.9 | 14.9 | -3989.53694530 | -1.2 | 19.7 |
| PA-9d(NaOPh)-ts(1,6minor)_05 | -3990.88256361 | -7.5  | 15.2 | -3989.96654589 | -5.4 | 17.4 | -3989.53732880 | -1.5 | 21.3 |
| PA-9d(NaOPh)-ts(1,6minor)_06 | -3990.88307144 | -7.8  | 14.4 | -3989.96574736 | -4.9 | 17.4 | -3989.53676773 | -1.1 | 21.1 |
| PA-9d(NaOPh)-ts(1,6minor)_07 | -3990.88184561 | -7.1  | 15.6 | -3989.96609115 | -5.1 | 17.6 | -3989.53686513 | -1.2 | 21.5 |
| PA-9d(NaOPh)-ts(1,6minor)_08 | -3990.87841703 | -4.9  | 17.1 | -3989.96356809 | -3.5 | 18.5 | -3989.53324107 | 1.1  | 23.1 |

## Figure S15-2

## dienoate

|                              |                |       |      |                |       |      |                |      |      |
|------------------------------|----------------|-------|------|----------------|-------|------|----------------|------|------|
| 9b(NaOPh)-Cu-allenyl         | -3990.86589294 | 0.0   | 0.0  | -3989.95169678 | 0.0   | 0.0  | -3989.52840609 | 0.0  | 0.0  |
| PA-9b(NaOPh)-ts(1,6major)_01 | -3990.88583980 | -12.5 | 8.3  | -3989.96949657 | -11.2 | 9.6  | -3989.53857734 | -6.4 | 14.4 |
| PA-9b(NaOPh)-ts(1,6major)_02 | -3990.88548206 | -12.3 | 8.9  | -3989.96797330 | -10.2 | 11.0 | -3989.53772754 | -5.8 | 15.3 |
| PA-9b(NaOPh)-ts(1,6major)_03 | -3990.88101107 | -9.5  | 11.4 | -3989.96483694 | -8.2  | 12.7 | -3989.53393017 | -3.5 | 17.5 |
| PA-9b(NaOPh)-ts(1,6major)_04 | -3990.88067273 | -9.3  | 11.5 | -3989.96399024 | -7.7  | 13.1 | -3989.53393846 | -3.5 | 17.3 |
| PA-9b(NaOPh)-ts(1,6major)_05 | -3990.88060330 | -9.2  | 12.1 | -3989.96443848 | -8.0  | 13.3 | -3989.53493498 | -4.1 | 17.2 |
| PA-9b(NaOPh)-ts(1,6major)_06 | -3990.88274944 | -10.6 | 11.9 | -3989.96414669 | -7.8  | 14.7 | -3989.53227581 | -2.4 | 20.1 |
| PA-9b(NaOPh)-ts(1,6major)_07 | -3990.87353187 | -4.8  | 14.1 | -3989.95790390 | -3.9  | 15.0 | -3989.52662121 | 1.1  | 20.0 |
| PA-9b(NaOPh)-ts(1,6minor)_01 | -3990.87893790 | -8.2  | 12.7 | -3989.96342848 | -7.4  | 13.5 | -3989.53149363 | -1.9 | 18.9 |
| PA-9b(NaOPh)-ts(1,6minor)_02 | -3990.87980368 | -8.7  | 11.9 | -3989.96294977 | -7.1  | 13.6 | -3989.53160224 | -2.0 | 18.6 |

|                              |                |      |      |                |      |      |                |      |      |
|------------------------------|----------------|------|------|----------------|------|------|----------------|------|------|
| PA-9b(NaOPh)-ts(1,6minor)_03 | -3990.87977702 | -8.7 | 12.0 | -3989.96290940 | -7.0 | 13.7 | -3989.53152023 | -2.0 | 18.7 |
| PA-9b(NaOPh)-ts(1,6minor)_04 | -3990.87796356 | -7.6 | 13.7 | -3989.96311122 | -7.2 | 14.1 | -3989.53113853 | -1.7 | 19.5 |
| PA-9b(NaOPh)-ts(1,6minor)_05 | -3990.88083576 | -9.4 | 13.2 | -3989.96368908 | -7.5 | 15.1 | -3989.53220270 | -2.4 | 20.2 |
| PA-9b(NaOPh)-ts(1,6minor)_06 | -3990.87483398 | -5.6 | 14.8 | -3989.95921919 | -4.7 | 15.7 | -3989.52758540 | 0.5  | 21.0 |
| PA-9b(NaOPh)-ts(1,6minor)_07 | -3990.87892017 | -8.2 | 14.2 | -3989.96162398 | -6.2 | 16.2 | -3989.52977495 | -0.9 | 21.5 |
| PA-9b(NaOPh)-ts(1,6minor)_08 | -3990.87438737 | -5.3 | 15.1 | -3989.95815071 | -4.0 | 16.3 | -3989.52673028 | 1.1  | 21.4 |
| PA-9b(NaOPh)-ts(1,6minor)_09 | -3990.87274545 | -4.3 | 18.0 | -3989.95570731 | -2.5 | 19.8 | -3989.52262616 | 3.6  | 25.9 |

## Figure S15-3

## dienoate

|                           |                |       |      |                |      |      |                |      |      |
|---------------------------|----------------|-------|------|----------------|------|------|----------------|------|------|
| 9d(Na)-Cu-allenyl         | -3683.33114499 | 0.0   | 0.0  | -3682.53933632 | 0.0  | 0.0  | -3682.14215505 | 0.0  | 0.0  |
| PA-9d(Na)-ts(1,6major)_01 | -3683.34676605 | -9.8  | 10.5 | -3682.55352058 | -8.9 | 11.4 | -3682.14942046 | -4.6 | 15.7 |
| PA-9d(Na)-ts(1,6major)_02 | -3683.34637627 | -9.6  | 10.0 | -3682.55204777 | -8.0 | 11.5 | -3682.14838128 | -3.9 | 15.6 |
| PA-9d(Na)-ts(1,6major)_03 | -3683.34644936 | -9.6  | 10.3 | -3682.55255109 | -8.3 | 11.6 | -3682.14889117 | -4.2 | 15.7 |
| PA-9d(Na)-ts(1,6major)_04 | -3683.34722260 | -10.1 | 10.0 | -3682.55264082 | -8.3 | 11.7 | -3682.15014079 | -5.0 | 15.1 |
| PA-9d(Na)-ts(1,6major)_05 | -3683.34683120 | -9.8  | 10.8 | -3682.55295126 | -8.5 | 12.1 | -3682.14977259 | -4.8 | 15.9 |
| PA-9d(Na)-ts(1,6major)_06 | -3683.34640275 | -9.6  | 10.6 | -3682.55209567 | -8.0 | 12.2 | -3682.14836230 | -3.9 | 16.3 |
| PA-9d(Na)-ts(1,6major)_07 | -3683.34637385 | -9.6  | 10.9 | -3682.55199435 | -7.9 | 12.5 | -3682.14832436 | -3.9 | 16.6 |
| PA-9d(Na)-ts(1,6major)_08 | -3683.34682156 | -9.8  | 10.9 | -3682.55230287 | -8.1 | 12.6 | -3682.14967668 | -4.7 | 16.0 |
| PA-9d(Na)-ts(1,6major)_09 | -3683.34553136 | -9.0  | 11.6 | -3682.55197571 | -7.9 | 12.7 | -3682.14848853 | -4.0 | 16.7 |
| PA-9d(Na)-ts(1,6major)_10 | -3683.34312938 | -7.5  | 12.8 | -3682.54888208 | -6.0 | 14.3 | -3682.14806647 | -3.7 | 16.6 |
| PA-9d(Na)-ts(1,6major)_11 | -3683.34387660 | -8.0  | 11.8 | -3682.54771420 | -5.3 | 14.5 | -3682.14542620 | -2.1 | 17.7 |
| PA-9d(Na)-ts(1,6major)_12 | -3683.34313801 | -7.5  | 13.0 | -3682.54882640 | -6.0 | 14.6 | -3682.14811013 | -3.7 | 16.8 |
| PA-9d(Na)-ts(1,6major)_13 | -3683.34009630 | -5.6  | 14.7 | -3682.54568387 | -4.0 | 16.3 | -3682.14207228 | 0.1  | 20.4 |
| PA-9d(Na)-ts(1,6major)_14 | -3683.33012110 | 0.6   | 21.6 | -3682.53688522 | 1.5  | 22.5 | -3682.13239519 | 6.1  | 27.0 |
| PA-9d(Na)-ts(1,6major)_15 | -3683.32663810 | 2.8   | 21.6 | -3682.53328150 | 3.8  | 22.6 | -3682.13068747 | 7.2  | 26.0 |
| PA-9d(Na)-ts(1,6major)_16 | -3683.32957456 | 1.0   | 21.5 | -3682.53590927 | 2.2  | 22.7 | -3682.13281618 | 5.9  | 26.4 |
| PA-9d(Na)-ts(1,6major)_17 | -3683.32833666 | 1.8   | 22.9 | -3682.53381764 | 3.5  | 24.6 | -3682.12909659 | 8.2  | 29.4 |
| PA-9d(Na)-ts(1,6minor)_01 | -3683.34306318 | -7.5  | 11.3 | -3682.54933664 | -6.3 | 12.5 | -3682.14702419 | -3.1 | 15.7 |
| PA-9d(Na)-ts(1,6minor)_02 | -3683.34141621 | -6.4  | 13.3 | -3682.54825054 | -5.6 | 14.1 | -3682.14629138 | -2.6 | 17.1 |
| PA-9d(Na)-ts(1,6minor)_03 | -3683.34317285 | -7.5  | 12.9 | -3682.54896953 | -6.0 | 14.4 | -3682.14628585 | -2.6 | 17.8 |
| PA-9d(Na)-ts(1,6minor)_04 | -3683.34325208 | -7.6  | 13.1 | -3682.54905303 | -6.1 | 14.6 | -3682.14635475 | -2.6 | 18.1 |
| PA-9d(Na)-ts(1,6minor)_05 | -3683.34325222 | -7.6  | 13.1 | -3682.54905303 | -6.1 | 14.6 | -3682.14635466 | -2.6 | 18.1 |
| PA-9d(Na)-ts(1,6minor)_06 | -3683.34186027 | -6.7  | 14.3 | -3682.54768087 | -5.2 | 15.8 | -3682.14531207 | -2.0 | 19.0 |
| PA-9d(Na)-ts(1,6minor)_07 | -3683.34200029 | -6.8  | 14.7 | -3682.54786094 | -5.3 | 16.1 | -3682.14543851 | -2.1 | 19.4 |
| PA-9d(Na)-ts(1,6minor)_08 | -3683.33832327 | -4.5  | 15.2 | -3682.54268167 | -2.1 | 17.6 | -3682.13918713 | 1.9  | 21.5 |
| PA-9d(Na)-ts(1,6minor)_09 | -3683.33735494 | -3.9  | 16.3 | -3682.54276464 | -2.2 | 18.1 | -3682.14025993 | 1.2  | 21.4 |

## Figure S15-4

|                   |                |     |     |                |     |     |                |     |     |
|-------------------|----------------|-----|-----|----------------|-----|-----|----------------|-----|-----|
| 9b(Na)-Cu-allenyl | -3683.33122166 | 0.0 | 0.0 | -3682.53742270 | 0.0 | 0.0 | -3682.13953768 | 0.0 | 0.0 |
|-------------------|----------------|-----|-----|----------------|-----|-----|----------------|-----|-----|

|                           |                |      |      |                |      |      |                |      |      |
|---------------------------|----------------|------|------|----------------|------|------|----------------|------|------|
| PA-9b(Na)-ts(1,6major)_01 | -3683.34236298 | -7.0 | 11.0 | -3682.54822576 | -6.8 | 11.2 | -3682.14321630 | -2.3 | 15.6 |
| PA-9b(Na)-ts(1,6major)_02 | -3683.34345568 | -7.7 | 12.3 | -3682.54821038 | -6.8 | 13.2 | -3682.14375831 | -2.6 | 17.3 |
| PA-9b(Na)-ts(1,6major)_03 | -3683.34309562 | -7.5 | 12.6 | -3682.54820094 | -6.8 | 13.3 | -3682.14297818 | -2.2 | 17.9 |
| PA-9b(Na)-ts(1,6major)_04 | -3683.33572722 | -2.8 | 18.5 | -3682.54178082 | -2.7 | 18.6 | -3682.13759984 | 1.2  | 22.5 |
| PA-9b(Na)-ts(1,6major)_05 | -3683.33097423 | 0.2  | 20.8 | -3682.53673734 | 0.4  | 21.1 | -3682.13053896 | 5.6  | 26.3 |
| PA-9b(Na)-ts(1,6minor)_01 | -3683.33654017 | -3.3 | 17.4 | -3682.54299270 | -3.5 | 17.2 | -3682.13718221 | 1.5  | 22.2 |
| PA-9b(Na)-ts(1,6minor)_02 | -3683.33542626 | -2.6 | 17.8 | -3682.54209191 | -2.9 | 17.5 | -3682.13764836 | 1.2  | 21.7 |
| PA-9b(Na)-ts(1,6minor)_03 | -3683.33554321 | -2.7 | 17.5 | -3682.54009067 | -1.7 | 18.5 | -3682.13541286 | 2.6  | 22.8 |
| PA-9b(Na)-ts(1,6minor)_04 | -3683.33510246 | -2.4 | 19.0 | -3682.54174041 | -2.7 | 18.7 | -3682.13645397 | 1.9  | 23.4 |
| PA-9b(Na)-ts(1,6minor)_05 | -3683.33505765 | -2.4 | 19.2 | -3682.53949236 | -1.3 | 20.3 | -3682.13411206 | 3.4  | 25.1 |
| PA-9b(Na)-ts(1,6minor)_06 | -3683.33048118 | 0.5  | 21.4 | -3682.53643815 | 0.6  | 21.5 | -3682.13209706 | 4.7  | 25.6 |
| PA-9b(Na)-ts(1,6minor)_07 | -3683.33397766 | -1.7 | 20.2 | -3682.53753509 | -0.1 | 21.8 | -3682.13165215 | 4.9  | 26.9 |
| PA-9b(Na)-ts(1,6minor)_08 | -3683.33306589 | -1.2 | 21.1 | -3682.53671447 | 0.4  | 22.7 | -3682.13126212 | 5.2  | 27.5 |

## Figure S15-5

|                              |                |       |      |                |       |      |                |       |      |
|------------------------------|----------------|-------|------|----------------|-------|------|----------------|-------|------|
| 9d(NaOPh)-Cu-allyl_01        | -4442.17621217 | 0.0   | 0.0  | -4441.08572350 | 0.0   | 0.0  | -4440.58346898 | 0.0   | 0.0  |
| AA-9d(NaOPh)-ts(1,6major)_01 | -4442.20703033 | -19.3 | 4.6  | -4441.11533859 | -18.6 | 5.3  | -4440.60922583 | -16.2 | 7.7  |
| AA-9d(NaOPh)-ts(1,6major)_02 | -4442.20489375 | -18.0 | 6.0  | -4441.11228523 | -16.7 | 7.3  | -4440.60661252 | -14.5 | 9.5  |
| AA-9d(NaOPh)-ts(1,6minor)_01 | -4442.20068755 | -15.4 | 7.0  | -4441.10803999 | -14.0 | 8.4  | -4440.60092130 | -11.0 | 11.4 |
| AA-9d(NaOPh)-ts(1,6minor)_02 | -4442.20127586 | -15.7 | 8.0  | -4441.10944341 | -14.9 | 8.9  | -4440.60302505 | -12.3 | 11.5 |
| AA-9d(NaOPh)-ts(1,6minor)_03 | -4442.20054743 | -15.3 | 8.2  | -4441.10864789 | -14.4 | 9.1  | -4440.60108924 | -11.1 | 12.4 |
| AA-9d(NaOPh)-ts(1,6minor)_04 | -4442.20071652 | -15.4 | 7.9  | -4441.10678225 | -13.2 | 10.1 | -4440.60103054 | -11.0 | 12.3 |
| AA-9d(NaOPh)-ts(1,6minor)_05 | -4442.19863449 | -14.1 | 10.0 | -4441.10662814 | -13.1 | 11.0 | -4440.60070510 | -10.8 | 13.3 |
| AA-9d(NaOPh)-ts(1,6minor)_06 | -4442.20001422 | -14.9 | 8.8  | -4441.10552521 | -12.4 | 11.3 | -4440.59835361 | -9.3  | 14.3 |
| AA-9d(NaOPh)-ts(1,6minor)_07 | -4442.20024707 | -15.1 | 9.4  | -4441.10656890 | -13.1 | 11.4 | -4440.59959907 | -10.1 | 14.3 |

## Figure S15-6

|                              |                |       |      |                |       |      |                |       |      |
|------------------------------|----------------|-------|------|----------------|-------|------|----------------|-------|------|
| 9b(NaOPh)-Cu-allyl_01        | -4442.17569662 | 0.0   | 0.0  | -4441.08335295 | 0.0   | 0.0  | -4440.57955401 | 0.0   | 0.0  |
| AA-9b(NaOPh)-ts(1,6major)_01 | -4442.20131098 | -16.1 | 6.3  | -4441.10769971 | -15.3 | 7.1  | -4440.59922567 | -12.3 | 10.0 |
| AA-9b(NaOPh)-ts(1,6major)_02 | -4442.19628680 | -12.9 | 9.6  | -4441.10262380 | -12.1 | 10.5 | -4440.59704010 | -11.0 | 11.6 |
| AA-9b(NaOPh)-ts(1,6minor)_01 | -4442.19924457 | -14.8 | 6.7  | -4441.10534786 | -13.8 | 7.6  | -4440.59570571 | -10.1 | 11.3 |
| AA-9b(NaOPh)-ts(1,6minor)_02 | -4442.19823864 | -14.1 | 8.0  | -4441.10475883 | -13.4 | 8.7  | -4440.59535551 | -9.9  | 12.2 |
| AA-9b(NaOPh)-ts(1,6minor)_03 | -4442.19924448 | -14.8 | 8.0  | -4441.10534773 | -13.8 | 9.0  | -4440.59570572 | -10.1 | 12.6 |
| AA-9b(NaOPh)-ts(1,6minor)_04 | -4442.19542885 | -12.4 | 11.3 | -4441.10245040 | -12.0 | 11.7 | -4440.59348192 | -8.7  | 15.0 |

| Figure S15-7                                 |                |       |      |                |       |      |                |      |      |
|----------------------------------------------|----------------|-------|------|----------------|-------|------|----------------|------|------|
| dienoate                                     |                |       |      |                |       |      |                |      |      |
| 9d(Na)-Cu-allyl_01                           | -4134.64133271 | 0.0   | 0.0  | -4133.67213363 | 0.0   | 0.0  | -4133.19437368 | 0.0  | 0.0  |
| AA-9d(Na)-ts(1,6major)_01                    | -4134.65947596 | -11.4 | 9.6  | -4133.68817393 | -10.1 | 10.9 | -4133.20733197 | -8.1 | 12.9 |
| AA-9d(Na)-ts(1,6major)_02                    | -4134.65987979 | -11.6 | 11.1 | -4133.68860448 | -10.3 | 12.4 | -4133.20790137 | -8.5 | 14.2 |
| AA-9d(Na)-ts(1,6major)_03                    | -4134.65667140 | -9.6  | 13.6 | -4133.68466801 | -7.9  | 15.4 | -4133.20375446 | -5.9 | 17.4 |
| AA-9d(Na)-ts(1,6minor)_01                    | -4134.65544875 | -8.9  | 13.1 | -4133.68404505 | -7.5  | 14.5 | -4133.20411140 | -6.1 | 15.9 |
| AA-9d(Na)-ts(1,6minor)_02                    | -4134.65547384 | -8.9  | 13.4 | -4133.68409382 | -7.5  | 14.8 | -4133.20412625 | -6.1 | 16.2 |
| AA-9d(Na)-ts(1,6minor)_03                    | -4134.65510410 | -8.6  | 12.9 | -4133.68243881 | -6.5  | 15.1 | -4133.19878775 | -2.8 | 18.8 |
| AA-9d(Na)-ts(1,6minor)_04                    | -4134.65396126 | -7.9  | 14.7 | -4133.68395240 | -7.4  | 15.2 | -4133.20356064 | -5.8 | 16.8 |
| AA-9d(Na)-ts(1,6minor)_05                    | -4134.65447296 | -8.2  | 13.8 | -4133.68256520 | -6.5  | 15.5 | -4133.20154738 | -4.5 | 17.6 |
| AA-9d(Na)-ts(1,6minor)_06                    | -4134.65421490 | -8.1  | 14.2 | -4133.68102125 | -5.6  | 16.7 | -4133.19761264 | -2.0 | 20.3 |
| AA-9d(Na)-ts(1,6minor)_07                    | -4134.65229900 | -6.9  | 15.3 | -4133.67952800 | -4.6  | 17.5 | -4133.19935266 | -3.1 | 19.0 |
| Figure S15-8                                 |                |       |      |                |       |      |                |      |      |
| 9b(Na)-Cu-allyl_01                           | -4134.63799627 | 0.0   | 0.0  | -4133.66778602 | 0.0   | 0.0  | -4133.18981887 | 0.0  | 0.0  |
| AA-9b(Na)-ts(1,6major)_01                    | -4134.65804731 | -12.6 | 10.1 | -4133.68556131 | -11.2 | 11.5 | -4133.20353635 | -8.6 | 14.1 |
| AA-9b(Na)-ts(1,6major)_02                    | -4134.65760253 | -12.3 | 11.1 | -4133.68627281 | -11.6 | 11.8 | -4133.20501553 | -9.5 | 13.9 |
| AA-9b(Na)-ts(1,6major)_03                    | -4134.65619808 | -11.4 | 11.5 | -4133.68522536 | -10.9 | 12.0 | -4133.20152430 | -7.3 | 15.6 |
| AA-9b(Na)-ts(1,6major)_04                    | -4134.64780501 | -6.2  | 19.6 | -4133.67543477 | -4.8  | 21.0 | -4133.19370891 | -2.4 | 23.3 |
| AA-9b(Na)-ts(1,6minor)_01                    | -4134.65491128 | -10.6 | 11.8 | -4133.68294647 | -9.5  | 12.9 | -4133.19814032 | -5.2 | 17.2 |
| AA-9b(Na)-ts(1,6minor)_02                    | -4134.65163752 | -8.6  | 13.6 | -4133.68002985 | -7.7  | 14.5 | -4133.19321540 | -2.1 | 20.0 |
| AA-9b(Na)-ts(1,6minor)_03                    | -4134.65271846 | -9.2  | 13.6 | -4133.68086175 | -8.2  | 14.6 | -4133.19926292 | -5.9 | 16.9 |
| AA-9b(Na)-ts(1,6minor)_04                    | -4134.65244233 | -9.1  | 14.2 | -4133.68097173 | -8.3  | 14.9 | -4133.19930310 | -6.0 | 17.3 |
| AA-9b(Na)-ts(1,6minor)_05                    | -4134.65046102 | -7.8  | 16.4 | -4133.67766334 | -6.2  | 18.0 | -4133.19458789 | -3.0 | 21.3 |
| Figure S15-9                                 |                |       |      |                |       |      |                |      |      |
| NaOPh<br>(PhO)2BpinNa<br>PhOBpin<br>dienoate |                |       |      |                |       |      |                |      |      |
| 9d(Naborate)-Cu-allenyl_01                   | -4401.65709416 | 0.0   | 0.0  | -4400.60052361 | 0.0   | 0.0  | -4400.11923224 | 0.0  | 0.0  |
| 9d(Naborate)-Cu-allenyl_02                   | -4401.65772252 | -0.4  | 0.5  | -4400.59987867 | 0.4   | 1.3  | -4400.11840878 | 0.5  | 1.4  |
| 9d(Naborate)-Cu-allenyl_03                   | -4401.65643311 | 0.4   | 2.2  | -4400.59836103 | 1.4   | 3.1  | -4400.11717220 | 1.3  | 3.1  |
| 9d(Naborate)-Cu-allenyl_04                   | -4401.66399031 | -4.3  | 1.2  | -4400.60318264 | -1.7  | 3.9  | -4400.12403966 | -3.0 | 2.5  |
| 9d(Naborate)-Cu-allenyl_05                   | -4401.65519879 | 1.2   | 4.4  | -4400.59775148 | 1.7   | 5.0  | -4400.11628161 | 1.9  | 5.1  |

|                                        |                |      |      |                |      |      |                |      |      |
|----------------------------------------|----------------|------|------|----------------|------|------|----------------|------|------|
| <b>9d(Naborate)-Cu-allenyl_06</b>      | -4401.65626111 | 0.5  | 4.2  | -4400.59841442 | 1.3  | 5.0  | -4400.11560925 | 2.3  | 6.0  |
| <b>9d(Naborate)-Cu-allenyl_07</b>      | -4401.65519606 | 1.2  | 4.6  | -4400.59776209 | 1.7  | 5.1  | -4400.11630725 | 1.8  | 5.2  |
| <b>PA-9b(Naborate)-ts(1,6major)_01</b> | -4401.67221016 | -9.5 | 13.7 | -4400.61544061 | -9.4 | 13.9 | -4400.12727851 | -5.0 | 18.2 |
| <b>PA-9b(Naborate)-ts(1,6major)_02</b> | -4401.66956403 | -7.8 | 14.4 | -4400.61266902 | -7.6 | 14.6 | -4400.12497118 | -3.6 | 18.6 |
| <b>PA-9b(Naborate)-ts(1,6major)_03</b> | -4401.67111750 | -8.8 | 15.2 | -4400.61344555 | -8.1 | 15.8 | -4400.12600752 | -4.3 | 19.7 |
| <b>PA-9b(Naborate)-ts(1,6major)_04</b> | -4401.67009455 | -8.2 | 14.5 | -4400.61055808 | -6.3 | 16.3 | -4400.12124566 | -1.3 | 21.3 |
| <b>PA-9b(Naborate)-ts(1,6major)_05</b> | -4401.66447263 | -4.6 | 17.5 | -4400.60662975 | -3.8 | 18.3 | -4400.12086012 | -1.0 | 21.1 |
| <b>PA-9b(Naborate)-ts(1,6major)_06</b> | -4401.66793415 | -6.8 | 17.2 | -4400.60960197 | -5.7 | 18.3 | -4400.12069989 | -0.9 | 23.1 |
| <b>PA-9b(Naborate)-ts(1,6major)_07</b> | -4401.66528390 | -5.1 | 18.7 | -4400.60854591 | -5.0 | 18.8 | -4400.11974276 | -0.3 | 23.5 |
| <b>PA-9b(Naborate)-ts(1,6major)_08</b> | -4401.66640979 | -5.8 | 19.3 | -4400.61001616 | -6.0 | 19.2 | -4400.12040084 | -0.7 | 24.4 |
| <b>PA-9b(Naborate)-ts(1,6major)_09</b> | -4401.66770692 | -6.7 | 18.1 | -4400.60900793 | -5.3 | 19.4 | -4400.12050567 | -0.8 | 23.9 |
| <b>PA-9b(Naborate)-ts(1,6major)_10</b> | -4401.66766870 | -6.6 | 18.4 | -4400.60889092 | -5.3 | 19.7 | -4400.12042179 | -0.7 | 24.3 |
| <b>9d-Cu-allenyl</b>                   | -3521.60502971 | 0.0  | 0.0  | -3520.81022808 | 0.0  | 0.0  | -3520.43853460 | 0.0  | 0.0  |
| <b>PA-9b-ts(1,6major)_01</b>           | -3521.60425395 | 0.5  | 21.1 | -3520.80891221 | 0.8  | 21.4 | -3520.42794961 | 6.6  | 27.2 |
| <b>PA-9b-ts(1,6major)_02</b>           | -3521.60337835 | 1.0  | 20.8 | -3520.80721035 | 1.9  | 21.6 | -3520.42723261 | 7.1  | 26.8 |
| <b>PA-9b-ts(1,6major)_03</b>           | -3521.60195548 | 1.9  | 22.6 | -3520.80639970 | 2.4  | 23.0 | -3520.42762763 | 6.8  | 27.5 |
| <b>PA-9b-ts(1,6major)_04</b>           | -3521.60232699 | 1.7  | 22.5 | -3520.80620250 | 2.5  | 23.4 | -3520.42720396 | 7.1  | 27.9 |
| <b>PA-9b-ts(1,6major)_05</b>           | -3521.60304453 | 1.2  | 23.2 | -3520.80746374 | 1.7  | 23.7 | -3520.42722045 | 7.1  | 29.1 |

E(sp,sum) ..... single point electronic energy in Hartree with Def2TZVPP basis set in thf(SMD) after mass balance

$\Delta E(\text{sp})$  ..... relative single point electronic energy in kcal/mol with Def2TZVPP basis set in thf(SMD)

$\Delta G(\text{sp})$  ..... relative single point free energy in kcal/mol with Def2TZVPP basis set in thf(SMD)

$$[\Delta G(\text{sp}) = \Delta E(\text{sp})/\text{Def2TZVPP} + \Delta G_{\text{corr}}/\text{Def2SVP}]$$

Table S3. Single point energies in Figures S1-1–S15-9 with MN12L and M06L

| structure                    | MN12L/Def2TZVPP <sub>thf(SMD)</sub> |                 |                 | M06L/Def2TZVPP <sub>thf(SMD)</sub> |                 |                 |
|------------------------------|-------------------------------------|-----------------|-----------------|------------------------------------|-----------------|-----------------|
|                              | E(sp,sum)                           | $\Delta E$ (sp) | $\Delta G$ (sp) | E(sp,sum)                          | $\Delta E$ (sp) | $\Delta G$ (sp) |
|                              | [hartree]                           | [kcal/mol]      | [kcal/mol]      | [hartree]                          | [kcal/mol]      | [kcal/mol]      |
| <b>Figure S1-1</b>           |                                     |                 |                 |                                    |                 |                 |
| dienoate                     |                                     |                 |                 |                                    |                 |                 |
| PhOH                         |                                     |                 |                 |                                    |                 |                 |
| NaOPh                        |                                     |                 |                 |                                    |                 |                 |
| tBuOH                        |                                     |                 |                 |                                    |                 |                 |
| NaOtBu                       |                                     |                 |                 |                                    |                 |                 |
| PhOBpin                      |                                     |                 |                 |                                    |                 |                 |
| (PhO)2BpinNa                 |                                     |                 |                 |                                    |                 |                 |
| 9d-Cu-allenyl                | -3915.11725962                      | 0.0             | 0.0             | -3917.31740791                     | 0.0             | 0.0             |
| PA-9d(Na)-ts(1,6major)       | -3915.15407417                      | -23.1           | -1.1            | -3917.35458388                     | -23.3           | -1.3            |
| 9d-Cu-allenyl                | -3988.95524383                      | 0.0             | 0.0             | -3991.15796389                     | 0.0             | 0.0             |
| PA-9d(Na)-ts(1,6major)       | -3988.96900804                      | -8.6            | 13.1            | -3991.16950518                     | -7.2            | 14.5            |
| 9d-Cu-allenyl                | -3988.95524383                      | 0.0             | 0.0             | -3991.15796389                     | 0.0             | 0.0             |
| PA-9d(NaOPh)-ts(1,6major)    | -3989.00751557                      | -32.8           | 5.0             | -3991.21133486                     | -33.5           | 4.3             |
| 9d-Cu-allenyl                | -3519.91942960                      | 0.0             | 0.0             | -3521.86429899                     | 0.0             | 0.0             |
| PA-9d-ts(1,6major)           | -3519.92077687                      | -0.8            | 18.9            | -3521.86622676                     | -1.2            | 18.5            |
| 9d-Cu-allenyl                | -4706.75067762                      | 24.7            | 8.4             | -4709.53787943                     | 21.7            | 5.4             |
| 9d-Cu-allenyl                | -4706.79008713                      | 0.0             | 0.0             | -4709.57243020                     | 0.0             | 0.0             |
| PA-9d(Naborate)-ts(1,6major) | -4706.82890327                      | -24.4           | -0.3            | -4709.61010108                     | -23.6           | 0.5             |
| <b>Figure S2-1</b>           |                                     |                 |                 |                                    |                 |                 |
| PA-9d(NaOPh)-prod(1,6major)  | -3989.03899396                      | -32.2           | -9.2            | -3991.24151410                     | -32.7           | -9.7            |
| PA-9d(NaOPh)-ts(1,6major)    | -3989.00751557                      | -12.4           | 8.8             | -3991.21133486                     | -13.7           | 7.6             |
| PA-9d(NaOPh)-pc(1,6major)    | -3989.02704061                      | -24.7           | -4.0            | -3991.22605265                     | -22.9           | -2.3            |
| 9d(NaOPh)-Cu-allenyl         | -3988.98769475                      | 0.0             | 0.0             | -3991.18948193                     | 0.0             | 0.0             |
| 9b(NaOPh)-Cu-allenyl         | -3988.97706437                      | 0.0             | 0.0             | -3991.18121663                     | 0.0             | 0.0             |
| PA-9b(NaOPh)-pc(1,6major)    | -3989.02046129                      | -27.2           | -6.8            | -3991.22010569                     | -24.4           | -4.0            |
| PA-9b(NaOPh)-ts(1,6major)    | -3989.00122102                      | -15.2           | 5.7             | -3991.20616255                     | -15.7           | 5.2             |
| PA-9b(NaOPh)-prod(1,6major)  | -3989.03231165                      | -34.7           | -12.3           | -3991.23456944                     | -33.5           | -11.1           |



|                             |                |       |       |                |       |      |
|-----------------------------|----------------|-------|-------|----------------|-------|------|
| PA-9d(NaOPh)-prod(1,6minor) | -3989.03689185 | -30.9 | -9.0  | -3991.23820115 | -30.6 | -8.7 |
| PA-9d(NaOPh)-ts(1,6minor)   | -3989.00412385 | -10.3 | 10.0  | -3991.20926419 | -12.4 | 7.9  |
| PA-9d(NaOPh)-pc(1,6minor)   | -3989.02003323 | -20.3 | -0.4  | -3991.22297882 | -21.0 | -1.1 |
| 9d(NaOPh)-Cu-allenyl        | -3988.98769475 | 0.0   | 0.0   | -3991.18948193 | 0.0   | 0.0  |
| 9b(NaOPh)-Cu-allenyl        | -3988.97706437 | 0.0   | 0.0   | -3991.18121663 | 0.0   | 0.0  |
| PA-9b(NaOPh)-pc(1,6minor)   | -3989.01406047 | -23.2 | -2.9  | -3991.21426698 | -20.7 | -0.4 |
| PA-9b(NaOPh)-ts(1,6minor)   | -3988.99262462 | -9.8  | 11.1  | -3991.19951812 | -11.5 | 9.4  |
| PA-9b(NaOPh)-prod(1,6minor) | -3989.03157967 | -34.2 | -11.4 | -3991.23193042 | -31.8 | -9.0 |

Figure S3-1

|                             |                |       |       |                |       |       |
|-----------------------------|----------------|-------|-------|----------------|-------|-------|
| AA-9d(NaOPh)-prod(1,6major) | -4440.01413222 | -47.6 | -21.7 | -4442.61546916 | -41.0 | -15.1 |
| AA-9d(NaOPh)-ts(1,6major)   | -4439.98449643 | -29.0 | -5.1  | -4442.59032238 | -25.2 | -1.4  |
| AA-9d(NaOPh)-pc(1,6major)   | -4439.99106756 | -33.2 | -9.9  | -4442.59598568 | -28.8 | -5.5  |
| 9d(NaOPh)-Cu-allyl          | -4439.93821085 | 0.0   | 0.0   | -4442.55008509 | 0.0   | 0.0   |
| 9b(NaOPh)-Cu-allyl          | -4439.93428626 | 0.0   | 0.0   | -4442.54510511 | 0.0   | 0.0   |
| AA-9b(NaOPh)-pc(1,6major)   | -4439.97354222 | -24.6 | -4.7  | -4442.58330672 | -24.0 | -4.0  |
| AA-9b(NaOPh)-ts(1,6major)   | -4439.96919497 | -21.9 | 0.4   | -4442.57882366 | -21.2 | 1.2   |
| AA-9b(NaOPh)-prod(1,6major) | -4440.00348691 | -43.4 | -18.4 | -4442.60504374 | -37.6 | -12.6 |
| AA-9d(NaOPh)-prod(1,6minor) | -4439.99730270 | -37.1 | -13.8 | -4442.60389082 | -33.8 | -10.5 |
| AA-9d(NaOPh)-ts(1,6minor)   | -4439.97369382 | -22.3 | 0.1   | -4442.58185530 | -19.9 | 2.5   |
| AA-9d(NaOPh)-pc(1,6minor)   | -4439.98273893 | -27.9 | -6.6  | -4442.58816473 | -23.9 | -2.5  |
| 9d(NaOPh)-Cu-allyl          | -4439.93821085 | 0.0   | 0.0   | -4442.55008509 | 0.0   | 0.0   |
| 9b(NaOPh)-Cu-allyl          | -4439.93428626 | 0.0   | 0.0   | -4442.54510511 | 0.0   | 0.0   |
| AA-9b(NaOPh)-pc(1,6minor)   | -4439.97502838 | -25.6 | -2.9  | -4442.58198960 | -23.1 | -0.5  |
| AA-9b(NaOPh)-ts(1,6minor)   | -4439.96841951 | -21.4 | 0.0   | -4442.57797333 | -20.6 | 0.8   |
| AA-9b(NaOPh)-prod(1,6minor) | -4132.65871479 | -41.1 | -14.7 | -4135.01532842 | -36.8 | -10.4 |

Figure S4-1

|                          |                |       |      |                |       |      |
|--------------------------|----------------|-------|------|----------------|-------|------|
| PA-9d(Na)-prod(1,6major) | -3681.69346285 | -32.2 | -9.2 | -3683.64965008 | -31.0 | -8.1 |
| PA-9d(Na)-ts(1,6major)   | -3681.65890032 | -10.5 | 9.0  | -3683.61645791 | -10.2 | 9.3  |
| PA-9d(Na)-pc(1,6major)   | -3681.68014307 | -23.8 | -4.0 | -3683.63163457 | -19.7 | 0.0  |
| 9d(Na)-Cu-allenyl        | -3681.64220587 | 0.0   | 0.0  | -3683.60017309 | 0.0   | 0.0  |
| 9b(Na)-Cu-allenyl        | -3681.63854301 | 0.0   | 0.0  | -3683.59431594 | 0.0   | 0.0  |
| PA-9b(Na)-pc(1,6major)   | -3681.66991213 | -19.7 | -1.8 | -3683.62447087 | -18.9 | -1.0 |
| PA-9b(Na)-ts(1,6major)   | -3681.65260731 | -8.8  | 9.1  | -3683.61172700 | -10.9 | 7.0  |
| PA-9b(Na)-prod(1,6major) | -3681.68384053 | -28.4 | -8.3 | -3683.64102610 | -29.3 | -9.2 |

|                          |                |       |       |                |       |       |
|--------------------------|----------------|-------|-------|----------------|-------|-------|
| PA-9d(Na)-prod(1,6minor) | -3681.69767573 | -34.8 | -12.6 | -3683.65214580 | -32.6 | -10.4 |
| PA-9d(Na)-ts(1,6minor)   | -3681.65761381 | -9.7  | 9.1   | -3683.61518754 | -9.4  | 9.4   |
| PA-9d(Na)-pc(1,6minor)   | -3681.67644378 | -21.5 | -2.7  | -3683.62940223 | -18.3 | 0.4   |
| 9d(Na)-Cu-allenyl        | -3681.64220587 | 0.0   | 0.0   | -3683.60017309 | 0.0   | 0.0   |
| 9b(Na)-Cu-allenyl        | -3681.63854301 | 0.0   | 0.0   | -3683.59431594 | 0.0   | 0.0   |
| PA-9b(Na)-pc(1,6minor)   | -3681.66846404 | -18.8 | -0.2  | -3683.62173223 | -17.2 | 1.3   |
| PA-9b(Na)-ts(1,6minor)   | -3681.64719232 | -5.4  | 15.3  | -3683.60512824 | -6.8  | 13.9  |
| PA-9b(Na)-prod(1,6minor) | -3681.67698136 | -24.1 | -3.9  | -3683.63526451 | -25.7 | -5.5  |

## Figure S5-1

|                          |                |       |       |                |       |       |
|--------------------------|----------------|-------|-------|----------------|-------|-------|
| AA-9d(Na)-prod(1,6major) | -4132.65875663 | -37.4 | -11.6 | -4135.01579235 | -33.2 | -7.5  |
| AA-9d(Na)-ts(1,6major)   | -4132.62729388 | -17.6 | 3.4   | -4134.98781113 | -15.7 | 5.3   |
| AA-9d(Na)-pc(1,6major)   | -4132.63690188 | -23.7 | -1.6  | -4134.99564009 | -20.6 | 1.5   |
| 9d(Na)-Cu-allyl          | -4132.59920742 | 0.0   | 0.0   | -4134.96284992 | 0.0   | 0.0   |
| 9b(Na)-Cu-allyl          | -4132.59314173 | 0.0   | 0.0   | -4134.95669225 | 0.0   | 0.0   |
| AA-9b(Na)-pc(1,6major)   | -4132.62795971 | -21.8 | 0.0   | -4134.98852372 | -20.0 | 1.8   |
| AA-9b(Na)-ts(1,6major)   | -4132.62290671 | -18.7 | 4.0   | -4134.98408524 | -17.2 | 5.5   |
| AA-9b(Na)-prod(1,6major) | -4132.65449061 | -38.5 | -13.3 | -4135.01348828 | -35.6 | -10.4 |
| AA-9d(Na)-prod(1,6minor) | -4132.65438935 | -34.6 | -13.6 | -4135.01646323 | -33.6 | -12.6 |
| AA-9d(Na)-ts(1,6minor)   | -4132.62446762 | -15.9 | 6.1   | -4134.98513729 | -14.0 | 8.0   |
| AA-9d(Na)-pc(1,6minor)   | -4132.63335143 | -21.4 | -0.7  | -4134.99337369 | -19.2 | 1.6   |
| 9d(Na)-Cu-allyl          | -4132.59920742 | 0.0   | 0.0   | -4134.96284992 | 0.0   | 0.0   |
| 9b(Na)-Cu-allyl          | -4132.59314173 | 0.0   | 0.0   | -4134.95669225 | 0.0   | 0.0   |
| AA-9b(Na)-pc(1,6minor)   | -4132.62056758 | -17.2 | 5.2   | -4134.98497847 | -17.7 | 4.6   |
| AA-9b(Na)-ts(1,6minor)   | -4132.61446188 | -13.4 | 9.1   | -4134.97988308 | -14.6 | 7.9   |
| AA-9b(Na)-prod(1,6minor) | -4132.65871479 | -41.1 | -14.7 | -4135.01532842 | -36.8 | -10.4 |

## Figure S6-1

thf  
PMe3  
Me2NHC  
NaOPh  
NaOtBu  
dienoate  
dienoate-NaOPh  
dienoate-NaOtBu

|                     |                |       |       |                |       |       |
|---------------------|----------------|-------|-------|----------------|-------|-------|
| Me2NHC-Cu-allenyl   | -3067.57268677 | -9.4  | -8.5  | -3068.99446394 | -9.7  | -8.8  |
| PMe3-Cu-allenyl     | -3067.55764389 | 0.0   | 0.0   | -3068.97897207 | 0.0   | 0.0   |
| thf-Cu-allenyl      | -3067.52865966 | 18.2  | 18.4  | -3068.95449265 | 15.4  | 15.5  |
| PA-NaOPh-prod(1,6)  | -3067.57451817 | -10.6 | -1.5  | -3068.99814559 | -12.0 | -2.9  |
| PA-NaOPh-ts(1,6)    | -3067.54632075 | 7.1   | 15.4  | -3068.97042261 | 5.4   | 13.6  |
| PA-NaOPh-ed(1,6)    | -3067.56556432 | -5.0  | 2.2   | -3068.98566931 | -4.2  | 3.0   |
| NaOPh-Cu-allenyl    | -3067.52117963 | 22.9  | 12.0  | -3068.94507477 | 21.3  | 10.4  |
| PA-NaOPh-ed(1,4)    | -3067.56557650 | -5.0  | 3.4   | -3068.98683009 | -4.9  | 3.4   |
| PA-NaOPh-ts(1,4)    | -3067.53751321 | 12.6  | 20.3  | -3068.96389522 | 9.5   | 17.1  |
| PA-NaOPh-prod(1,4)  | -3067.57977095 | -13.9 | -4.5  | -3069.00233144 | -14.7 | -5.3  |
| Me2NHC-Cu-allenyl   | -2993.73206876 | -9.4  | -8.5  | -2995.15164903 | -9.7  | -8.8  |
| PMe3-Cu-allenyl     | -2993.71702588 | 0.0   | 0.0   | -2995.13615716 | 0.0   | 0.0   |
| thf-Cu-allenyl      | -2993.68804165 | 18.2  | 18.4  | -2995.11167774 | 15.4  | 15.5  |
| PA-NaOtBu-prod(1,6) | -2993.74967708 | -20.5 | -11.4 | -2995.17020059 | -21.4 | -12.3 |
| PA-NaOtBu-ts(1,6)   | -2993.72167593 | -2.9  | 4.0   | -2995.14360482 | -4.7  | 2.2   |
| PA-NaOtBu-ed(1,6)   | -2993.74111995 | -15.1 | -9.7  | -2995.15925402 | -14.5 | -9.0  |
| NaOtBu-Cu-allenyl   | -2993.70041292 | 10.4  | 0.3   | -2995.12122885 | 9.4   | -0.8  |
| PA-NaOtBu-ed(1,4)   | -2993.73783340 | -13.1 | -8.9  | -2995.15684426 | -13.0 | -8.8  |
| PA-NaOtBu-ts(1,4)   | -2993.71331891 | 2.3   | 6.6   | -2995.13749247 | -0.8  | 3.4   |
| PA-NaOtBu-prod(1,4) | -2993.75732276 | -25.3 | -16.4 | -2995.17738375 | -25.9 | -16.9 |

## Figure S7-1

|                          |                |       |       |                |       |      |
|--------------------------|----------------|-------|-------|----------------|-------|------|
| Me2NHC-Cu-allyl          | -3355.24321642 | 0.0   | 0.0   | -3357.10632272 | 0.0   | 0.0  |
| AA-Me2NHC-pc(1,6major)   | -3355.26935032 | -16.4 | 1.6   | -3357.13110963 | -15.6 | 2.4  |
| AA-Me2NHC-ts(1,6major)   | -3355.25748740 | -9.0  | 11.0  | -3357.11986845 | -8.5  | 11.5 |
| AA-Me2NHC-prod(1,6major) | -3355.29689897 | -33.7 | -10.4 | -3357.15255945 | -29.0 | -5.7 |
| Me2NHC-Cu-allyl          | -3355.24321642 | 0.0   | 0.0   | -3357.10632272 | 0.0   | 0.0  |
| AA-Me2NHC-pc(1,6minor)   | -3355.26483825 | -13.6 | 5.8   | -3357.12662993 | -12.7 | 6.6  |
| AA-Me2NHC-ts(1,6minor)   | -3355.24399525 | -0.5  | 19.6  | -3357.11002309 | -2.3  | 17.7 |
| AA-Me2NHC-prod(1,6minor) | -3355.28748327 | -27.8 | -4.7  | -3357.14567474 | -24.7 | -1.6 |

## Figure S8-1

|                  |                |       |     |                |       |      |
|------------------|----------------|-------|-----|----------------|-------|------|
| dienoate         |                |       |     |                |       |      |
| SIMes-Cu-allenyl | -3523.29081705 | 0.0   | 0.0 | -3525.27967395 | 0.0   | 0.0  |
| PA-SIMes-ed(1,6) | -3523.31032234 | -12.2 | 9.0 | -3525.29638633 | -10.5 | 10.7 |

|                       |                |       |      |                |       |      |
|-----------------------|----------------|-------|------|----------------|-------|------|
| PA-SIMes-ts(1,6)      | -3523.28696552 | 2.4   | 23.5 | -3525.27897181 | 0.4   | 21.5 |
| PA-SIMes-prod(1,6)    | -3523.32069688 | -18.7 | 4.3  | -3525.30840766 | -18.0 | 5.0  |
| PA-SIMes-ed(1,4AA)    | -3523.31040061 | -12.3 | 8.8  | -3525.29649479 | -10.6 | 10.5 |
| PA-SIMes-ts(1,4AA)    | -3523.27496891 | 9.9   | 30.2 | -3525.26409812 | 9.8   | 30.0 |
| PA-SIMes-prod(1,4AA)  | -3523.30558967 | -9.3  | 10.3 | -3525.29531886 | -9.8  | 9.7  |
| PA-SIMes-ed(1,4)      | -3523.30185942 | -6.9  | 11.8 | -3525.28980866 | -6.4  | 12.4 |
| PA-SIMes-ts(1,4)      | -3523.27086805 | 12.5  | 29.8 | -3525.26350146 | 10.1  | 27.4 |
| PA-SIMes-prod(1,4)    | -3523.29530207 | -2.8  | 18.7 | -3525.28541990 | -3.6  | 17.9 |
| PPh3-Cu-allenyl       | -3634.37473733 | 0.0   | 0.0  | -3636.12405204 | 0.0   | 0.0  |
| PA-PPh3-ed(1,6)       | -3634.39255636 | -11.2 | 6.3  | -3636.13720128 | -8.3  | 9.2  |
| PA-PPh3-ts(1,6)       | -3634.37179150 | 1.8   | 20.8 | -3636.11969411 | 2.7   | 21.7 |
| PA-PPh3-prod(1,6)     | -3634.39834254 | -14.8 | 5.3  | -3636.14527592 | -13.3 | 6.8  |
| PA-PPh3-ed(1,4AA)     | -3634.39500421 | -12.7 | 3.5  | -3636.13810576 | -8.8  | 7.4  |
| PA-PPh3-ts(1,4AA)     | -3634.35336214 | 13.4  | 29.2 | -3636.10167173 | 14.0  | 29.8 |
| PA-PPh3-prod(1,4AA)   | -3634.39043759 | -9.9  | 8.6  | -3636.13614291 | -7.6  | 10.9 |
| PA-PPh3-ed(1,4)       | -3634.38329604 | -5.4  | 10.2 | -3636.13177471 | -4.8  | 10.7 |
| PA-PPh3-ts(1,4)       | -3634.35715169 | 11.0  | 26.0 | -3636.10926249 | 9.3   | 24.2 |
| PA-PPh3-prod(1,4)     | -3634.39691294 | -13.9 | 4.6  | -3636.14917369 | -15.8 | 2.8  |
| <b>Figures S9-1</b>   |                |       |      |                |       |      |
| Me2NHC-Cu-allenyl     | -2904.29853208 | 0.0   | 0.0  | -2905.75529300 | 0.0   | 0.0  |
| PA-Me2NHC-ed(1,6)     | -2904.31306431 | -9.1  | 8.8  | -2905.76585482 | -6.6  | 11.3 |
| PA-Me2NHC-ts(1,6)     | -2904.29048712 | 5.0   | 23.0 | -2905.74797770 | 4.6   | 22.6 |
| PA-Me2NHC-prod(1,6)   | -2904.32456865 | -16.3 | 5.6  | -2905.78046860 | -15.8 | 6.1  |
| PA-Me2NHC-ed(1,4AA)   | -2904.31285139 | -9.0  | 7.3  | -2905.76658869 | -7.1  | 9.2  |
| PA-Me2NHC-ts(1,4AA)   | -2904.27143391 | 17.0  | 32.7 | -2905.72999526 | 15.9  | 31.5 |
| PA-Me2NHC-prod(1,4AA) | -2904.31311535 | -9.2  | 6.5  | -2905.77014571 | -9.3  | 6.3  |
| PA-Me2NHC-ed(1,4)     | -2904.30356875 | -3.2  | 11.8 | -2905.75996655 | -2.9  | 12.1 |
| PA-Me2NHC-ts(1,4)     | -2904.27296027 | 16.0  | 32.2 | -2905.73404811 | 13.3  | 29.5 |
| PA-Me2NHC-prod(1,4)   | -2904.29837301 | 0.1   | 18.5 | -2905.75621766 | -0.6  | 17.9 |
| PMe3-Cu-allenyl       | -3059.44142523 | 0.0   | 0.0  | -3060.79278105 | 0.0   | 0.0  |
| PA-PMe3-ed(1,6)       | -3059.46255113 | -13.3 | 3.8  | -3060.80924612 | -10.3 | 6.7  |
| PA-PMe3-ts(1,6)       | -3059.43836677 | 1.9   | 20.0 | -3060.78930859 | 2.2   | 20.2 |

|                     |                |       |      |                |       |      |
|---------------------|----------------|-------|------|----------------|-------|------|
| PA-PMe3-prod(1,6)   | -3059.46870932 | -17.1 | 2.5  | -3060.81852370 | -16.2 | 3.5  |
| PA-PMe3-ed(1,4AA)   | -3059.46255120 | -13.3 | 3.8  | -3060.80924613 | -10.3 | 6.7  |
| PA-PMe3-ts(1,4AA)   | -3059.41687751 | 15.4  | 31.5 | -3060.76799334 | 15.6  | 31.7 |
| PA-PMe3-prod(1,4AA) | -3059.45490062 | -8.5  | 9.0  | -3060.80517642 | -7.8  | 9.6  |
| PA-PMe3-ed(1,4)     | -3059.45343333 | -7.5  | 8.5  | -3060.80280537 | -6.3  | 9.8  |
| PA-PMe3-ts(1,4)     | -3059.42286466 | 11.6  | 26.7 | -3060.77688803 | 10.0  | 25.1 |
| PA-PMe3-prod(1,4)   | -3059.46878775 | -17.2 | 3.4  | -3060.81765335 | -15.6 | 5.0  |

## Figure S10-1

## dienoate

## dienoate-Naborate

|                                |                |       |      |                |       |      |
|--------------------------------|----------------|-------|------|----------------|-------|------|
| SIMes-Cu-allenyl               | -4168.54657814 | 0.0   | 0.0  | -4170.91075872 | 0.0   | 0.0  |
| PA-SIMes(Naborate)-ed(1,6)     | -4168.57396846 | -17.2 | 5.8  | -4170.93719144 | -16.6 | 6.4  |
| PA-SIMes(Naborate)-ts(1,6)     | -4168.55903745 | -7.8  | 14.3 | -4170.92535650 | -9.2  | 13.0 |
| PA-SIMes(Naborate)-prod(1,6)   | -4168.59103323 | -27.9 | -4.3 | -4170.95667949 | -28.8 | -5.3 |
| PA-SIMes(Naborate)-ed(1,4AA)   | -4168.57255642 | -16.3 | 5.5  | -4170.93425893 | -14.7 | 7.1  |
| PA-SIMes(Naborate)-ts(1,4AA)   | -4168.54961643 | -1.9  | 18.7 | -4170.91184700 | -0.7  | 19.9 |
| PA-SIMes(Naborate)-prod(1,4AA) | -4168.58016946 | -21.1 | 1.0  | -4170.94447426 | -21.2 | 1.0  |
| PA-SIMes(Naborate)-ed(1,4)     | -4168.56919756 | -14.2 | 7.4  | -4170.93447285 | -14.9 | 6.7  |
| PA-SIMes(Naborate)-ts(1,4)     | -4168.53682327 | 6.1   | 26.7 | -4170.90769161 | 1.9   | 22.5 |
| PA-SIMes(Naborate)-prod(1,4)   | -4168.58194312 | -22.2 | 1.1  | -4170.94875846 | -23.8 | -0.6 |

## dienoate

## dienoate-Naborate

|                               |                |       |      |                |       |      |
|-------------------------------|----------------|-------|------|----------------|-------|------|
| PPh3-Cu-allenyl               | -4279.63049842 | 0.0   | 0.0  | -4281.75513681 | 0.0   | 0.0  |
| PA-PPh3(Naborate)-ed(1,6)     | -4279.66007306 | -18.6 | 1.2  | -4281.77850422 | -14.7 | 5.1  |
| PA-PPh3(Naborate)-ts(1,6)     | -4279.64307242 | -7.9  | 11.6 | -4281.76552549 | -6.5  | 13.0 |
| PA-PPh3(Naborate)-prod(1,6)   | -4279.67544517 | -28.2 | -5.8 | -4281.79963842 | -27.9 | -5.5 |
| PA-PPh3(Naborate)-ed(1,4AA)   | -4279.66365288 | -20.8 | -3.6 | -4281.78092068 | -16.2 | 1.1  |
| PA-PPh3(Naborate)-ts(1,4AA)   | -4279.61970053 | 6.8   | 21.9 | -4281.74494460 | 6.4   | 21.5 |
| PA-PPh3(Naborate)-prod(1,4AA) | -4279.66004136 | -18.5 | -2.0 | -4281.78454966 | -18.5 | -1.9 |
| PA-PPh3(Naborate)-ed(1,4)     | -4279.65214949 | -13.6 | 3.1  | -4281.77593959 | -13.1 | 3.7  |
| PA-PPh3(Naborate)-ts(1,4)     | -4279.62190142 | 5.4   | 23.5 | -4281.75121016 | 2.5   | 20.6 |
| PA-PPh3(Naborate)-prod(1,4)   | -4279.67456744 | -27.7 | -4.3 | -4281.79794098 | -26.9 | -3.5 |

| Figure S11-1             |                |       |       |                |       |       |
|--------------------------|----------------|-------|-------|----------------|-------|-------|
| <b>dienoate</b>          |                |       |       |                |       |       |
| PA-9d(Na)-prod(1,6major) | -3681.69346285 | -32.2 | -9.2  | -3683.64965008 | -31.0 | -8.1  |
| PA-9d(Na)-ts(1,6major)   | -3681.65890032 | -10.5 | 9.0   | -3683.61645791 | -10.2 | 9.3   |
| PA-9d(Na)-pc(1,6major)   | -3681.68014307 | -23.8 | -4.0  | -3683.63163457 | -19.7 | 0.0   |
| 9d(Na)-Cu-allenyl        | -3681.64220587 | 0.0   | 0.0   | -3683.60017309 | 0.0   | 0.0   |
| PA-9d(Na)-pc(1,4AA)      | -3681.67695298 | -21.8 | -3.1  | -3683.62960104 | -18.5 | 0.2   |
| PA-9d(Na)-ts(1,4AA)      | -3681.64286191 | -0.4  | 17.1  | -3683.59859721 | 1.0   | 18.5  |
| PA-9d(Na)-prod(1,4AA)    | -3681.69337452 | -32.1 | -13.9 | -3683.64664235 | -29.2 | -10.9 |

| Figure S12-1               |                |       |       |                |       |       |
|----------------------------|----------------|-------|-------|----------------|-------|-------|
| <b>NaOtBu<br/>dienoate</b> |                |       |       |                |       |       |
| PA-SIMes(NaOtBu)-prod(1,4) | -2681.01158198 | -31.5 | -12.5 | -2682.33360210 | -35.1 | -16.1 |
| PA-SIMes(NaOtBu)-ts(1,4)   | -2680.95049607 | 6.8   | 24.8  | -2682.27574713 | 1.2   | 19.2  |
| PA-SIMes(NaOtBu)-ed(1,4)   | -2680.98050930 | -12.0 | 5.6   | -2682.29988097 | -13.9 | 3.7   |
| SIMes-Cu-allenyl           | -2680.92322911 | 23.9  | 5.6   | -2682.24368403 | 21.3  | 3.0   |
| SIMes-Cu(NaOtBu)-allenyl   | -2680.96134791 | 0.0   | 0.0   | -2682.27767721 | 0.0   | 0.0   |
| PA-SIMes(NaOtBu)-ed(1,6)   | -2680.97677028 | -9.7  | 8.8   | -2682.29568679 | -11.3 | 7.2   |
| PA-SIMes(NaOtBu)-ts(1,6)   | -2680.96128513 | 0.0   | 17.7  | -2682.28348059 | -3.6  | 14.0  |
| PA-SIMes(NaOtBu)-prod(1,6) | -2680.99281613 | -19.7 | -1.2  | -2682.31556896 | -23.8 | -5.3  |
| PA-PPh3(NaOtBu)-prod(1,4)  | -2792.09786618 | -32.0 | -8.9  | -2793.17743540 | -32.5 | -9.4  |
| PA-PPh3(NaOtBu)-ts(1,4)    | -2792.05966742 | -8.0  | 10.6  | -2793.14110019 | -9.7  | 8.9   |
| PA-PPh3(NaOtBu)-ed(1,4)    | -2792.08240508 | -22.3 | -2.5  | -2793.15636218 | -19.3 | 0.5   |
| PPh3-Cu-allenyl            | -2792.00714939 | 24.9  | 9.2   | -2793.08806212 | 23.6  | 7.9   |
| PPh3-Cu(NaOtBu)-allenyl    | -2792.04686639 | 0.0   | 0.0   | -2793.12561387 | 0.0   | 0.0   |
| PA-PPh3(NaOtBu)-ed(1,6)    | -2792.06512212 | -11.5 | 6.4   | -2793.13977301 | -8.9  | 9.0   |
| PA-PPh3(NaOtBu)-ts(1,6)    | -2792.04752033 | -0.4  | 19.0  | -2793.12642983 | -0.5  | 18.9  |
| PA-PPh3(NaOtBu)-prod(1,6)  | -2792.08004009 | -20.8 | -0.1  | -2793.15993175 | -21.5 | -0.8  |

| Figure S13-1 |  |  |  |  |  |  |
|--------------|--|--|--|--|--|--|
|--------------|--|--|--|--|--|--|

| <b>NaOMe</b>                     |                |       |       |                |       |       |
|----------------------------------|----------------|-------|-------|----------------|-------|-------|
| <b>dienoate</b>                  |                |       |       |                |       |       |
| <b>PA-SIMes(NaOMe)-prod(1,4)</b> | -2681.00869379 | -33.6 | -12.2 | -2682.32978917 | -35.2 | -13.8 |
| <b>PA-SIMes(NaOMe)-ts(1,4)</b>   | -2680.95007529 | 3.2   | 21.7  | -2682.27386062 | -0.1  | 18.4  |
| <b>PA-SIMes(NaOMe)-ed(1,4)</b>   | -2680.97481086 | -12.3 | 6.3   | -2682.29342783 | -12.4 | 6.3   |
| <b>SIMes-Cu-allenyl</b>          | -2680.92322911 | 20.0  | 4.5   | -2682.24368403 | 18.8  | 3.3   |
| <b>SIMes-Cu(NaOMe)-allenyl</b>   | -2680.95517855 | 0.0   | 0.0   | -2682.27370087 | 0.0   | 0.0   |
| <b>PA-SIMes(NaOMe)-ed(1,6)</b>   | -2680.97618321 | -13.2 | 5.0   | -2682.29498499 | -13.4 | 4.9   |
| <b>PA-SIMes(NaOMe)-ts(1,6)</b>   | -2680.96034498 | -3.2  | 16.7  | -2682.28286620 | -5.8  | 14.2  |
| <b>PA-SIMes(NaOMe)-prod(1,6)</b> | -2680.99169730 | -22.9 | -2.9  | -2682.31507181 | -26.0 | -6.0  |
| <b>PA-PPh3(NaOMe)-prod(1,4)</b>  | -2792.09813069 | -33.6 | -10.9 | -2793.17532327 | -32.4 | -9.6  |
| <b>PA-PPh3(NaOMe)-ts(1,4)</b>    | -2792.05449013 | -6.3  | 11.8  | -2793.13614579 | -7.8  | 10.2  |
| <b>PA-PPh3(NaOMe)-ed(1,4)</b>    | -2792.07786545 | -20.9 | -1.4  | -2793.15207512 | -17.8 | 1.7   |
| <b>PPh3-Cu-allenyl</b>           | -2792.00714939 | 23.4  | 9.7   | -2793.08806212 | 22.3  | 8.6   |
| <b>PPh3-Cu(NaOMe)-allenyl</b>    | -2792.04451882 | 0.0   | 0.0   | -2793.12367594 | 0.0   | 0.0   |
| <b>PA-PPh3(NaOMe)-ed(1,6)</b>    | -2792.05883192 | -9.0  | 7.8   | -2793.13484034 | -7.0  | 9.8   |
| <b>PA-PPh3(NaOMe)-ts(1,6)</b>    | -2792.04124173 | 2.1   | 20.0  | -2793.12191820 | 1.1   | 19.1  |
| <b>PA-PPh3(NaOMe)-prod(1,6)</b>  | -2792.07490789 | -19.1 | 1.5   | -2793.15644102 | -20.6 | 0.0   |

Figure S14-1

| <b>NaOtBu</b>                      |                |       |       |                |       |       |
|------------------------------------|----------------|-------|-------|----------------|-------|-------|
| <b>dienoate</b>                    |                |       |       |                |       |       |
| <b>PA-Me2NHC(NaOtBu)-prod(1,4)</b> | -2062.01692017 | -39.1 | -19.1 | -2062.80470147 | -38.7 | -18.8 |
| <b>PA-Me2NHC(NaOtBu)-ts(1,4)</b>   | -2061.96325074 | -5.4  | 11.4  | -2062.75487771 | -7.4  | 9.4   |
| <b>PA-Me2NHC(NaOtBu)-ed(1,4)</b>   | -2061.98079241 | -16.4 | 1.6   | -2062.76543987 | -14.1 | 4.0   |
| <b>Me2NHC-Cu-allenyl</b>           | -2061.93092983 | 14.9  | -2.0  | -2062.71931777 | 14.9  | -2.0  |
| <b>Me2NHC-Cu(NaOtBu)-allenyl</b>   | -2061.95461986 | 0.0   | 0.0   | -2062.74302749 | 0.0   | 0.0   |
| <b>PA-Me2NHC(NaOtBu)-ed(1,6)</b>   | -2061.98215734 | -17.3 | -1.7  | -2062.76851811 | -16.0 | -0.4  |
| <b>PA-Me2NHC(NaOtBu)-ts(1,6)</b>   | -2061.96252871 | -5.0  | 12.2  | -2062.75400440 | -6.9  | 10.2  |
| <b>PA-Me2NHC(NaOtBu)-prod(1,6)</b> | -2061.99851021 | -27.5 | -7.7  | -2062.78817363 | -28.3 | -8.5  |
| <b>PA-PMe3(NaOtBu)-prod(1,4)</b>   | -2217.16382074 | -34.1 | -10.3 | -2217.84422101 | -33.4 | -9.5  |
| <b>PA-PMe3(NaOtBu)-ts(1,4)</b>     | -2217.11646275 | -4.4  | 13.4  | -2217.80110599 | -6.3  | 11.5  |

|                           |                |       |      |                |       |      |
|---------------------------|----------------|-------|------|----------------|-------|------|
| PA-PMe3(NaOtBu)-cd(1,4)   | -2217.13337855 | -15.0 | 2.8  | -2217.81299290 | -13.8 | 4.0  |
| PMe3-Cu-allenyl           | -2217.07383729 | 22.3  | 7.9  | -2217.75679113 | 21.5  | 7.1  |
| PMe3-Cu(NaOtBu)-allenyl   | -2217.10941604 | 0.0   | 0.0  | -2217.79106277 | 0.0   | 0.0  |
| PA-PMe3(NaOtBu)-cd(1,6)   | -2217.12650231 | -10.7 | 8.3  | -2217.80590894 | -9.3  | 9.7  |
| PA-PMe3(NaOtBu)-ts(1,6)   | -2217.10469744 | 3.0   | 22.9 | -2217.78964372 | 0.9   | 20.9 |
| PA-PMe3(NaOtBu)-prod(1,6) | -2217.13913008 | -18.6 | 2.8  | -2217.82318067 | -20.2 | 1.3  |

## Figure S15-1

NaOPh  
dienoate

|                              |                |       |      |                |       |      |
|------------------------------|----------------|-------|------|----------------|-------|------|
| 9d(NaOPh)-Cu-allenyl         | -3988.98769475 | 0.0   | 0.0  | -3991.18948193 | 0.0   | 0.0  |
| PA-9d(NaOPh)-ts(1,6major)_01 | -3989.00751557 | -12.4 | 8.8  | -3991.21133486 | -13.7 | 7.6  |
| PA-9d(NaOPh)-ts(1,6major)_02 | -3989.00855577 | -13.1 | 8.5  | -3991.21106691 | -13.5 | 8.0  |
| PA-9d(NaOPh)-ts(1,6major)_03 | -3989.00225925 | -9.1  | 11.5 | -3991.20679575 | -10.9 | 9.8  |
| PA-9d(NaOPh)-ts(1,6minor)_01 | -3989.00412385 | -10.3 | 10.0 | -3991.20926419 | -12.4 | 7.9  |
| PA-9d(NaOPh)-ts(1,6minor)_02 | -3989.00347070 | -9.9  | 11.4 | -3991.20901727 | -12.3 | 9.0  |
| PA-9d(NaOPh)-ts(1,6minor)_03 | -3989.00340749 | -9.9  | 11.9 | -3991.20895959 | -12.2 | 9.5  |
| PA-9d(NaOPh)-ts(1,6minor)_04 | -3989.00292070 | -9.6  | 11.3 | -3991.20709310 | -11.1 | 9.8  |
| PA-9d(NaOPh)-ts(1,6minor)_05 | -3989.00407258 | -10.3 | 12.4 | -3991.20558884 | -10.1 | 12.6 |
| PA-9d(NaOPh)-ts(1,6minor)_06 | -3989.00431408 | -10.4 | 11.8 | -3991.20434352 | -9.3  | 12.9 |
| PA-9d(NaOPh)-ts(1,6minor)_07 | -3989.00392992 | -10.2 | 12.5 | -3991.20503805 | -9.8  | 12.9 |
| PA-9d(NaOPh)-ts(1,6minor)_08 | -3988.99696407 | -5.8  | 16.2 | -3991.20267596 | -8.3  | 13.7 |

## Figure S15-2

## dienoate

|                              |                |       |      |                |       |      |
|------------------------------|----------------|-------|------|----------------|-------|------|
| 9b(NaOPh)-Cu-allenyl         | -3988.97706437 | 0.0   | 0.0  | -3991.18121663 | 0.0   | 0.0  |
| PA-9b(NaOPh)-ts(1,6major)_01 | -3989.00122102 | -15.2 | 5.7  | -3991.20616255 | -15.7 | 5.2  |
| PA-9b(NaOPh)-ts(1,6major)_02 | -3989.00180413 | -15.5 | 5.7  | -3991.20461588 | -14.7 | 6.5  |
| PA-9b(NaOPh)-ts(1,6major)_03 | -3988.99857144 | -13.5 | 7.4  | -3991.20209966 | -13.1 | 7.8  |
| PA-9b(NaOPh)-ts(1,6major)_04 | -3988.99723215 | -12.7 | 8.1  | -3991.20142194 | -12.7 | 8.1  |
| PA-9b(NaOPh)-ts(1,6major)_05 | -3988.99977113 | -14.2 | 7.0  | -3991.20292311 | -13.6 | 7.7  |
| PA-9b(NaOPh)-ts(1,6major)_06 | -3988.99704889 | -12.5 | 10.0 | -3991.20055918 | -12.1 | 10.4 |
| PA-9b(NaOPh)-ts(1,6major)_07 | -3988.99041056 | -8.4  | 10.5 | -3991.19344823 | -7.7  | 11.2 |
| PA-9b(NaOPh)-ts(1,6minor)_01 | -3988.99262462 | -9.8  | 11.1 | -3991.19951812 | -11.5 | 9.4  |
| PA-9b(NaOPh)-ts(1,6minor)_02 | -3988.99821876 | -13.3 | 7.4  | -3991.20075841 | -12.3 | 8.4  |



|                              |                |       |      |                |       |      |
|------------------------------|----------------|-------|------|----------------|-------|------|
| PA-9b(NaOPh)-ts(1,6minor)_03 | -3988.99811765 | -13.2 | 7.5  | -3991.20069813 | -12.2 | 8.5  |
| PA-9b(NaOPh)-ts(1,6minor)_04 | -3988.99154901 | -9.1  | 12.1 | -3991.19952709 | -11.5 | 9.7  |
| PA-9b(NaOPh)-ts(1,6minor)_05 | -3988.99955797 | -14.1 | 8.5  | -3991.20142088 | -12.7 | 9.9  |
| PA-9b(NaOPh)-ts(1,6minor)_06 | -3988.99445142 | -10.9 | 9.5  | -3991.19628328 | -9.5  | 11.0 |
| PA-9b(NaOPh)-ts(1,6minor)_07 | -3988.99731955 | -12.7 | 9.7  | -3991.19931176 | -11.4 | 11.0 |
| PA-9b(NaOPh)-ts(1,6minor)_08 | -3988.99342975 | -10.3 | 10.1 | -3991.19551283 | -9.0  | 11.4 |
| PA-9b(NaOPh)-ts(1,6minor)_09 | -3988.98457282 | -4.7  | 17.6 | -3991.19226624 | -6.9  | 15.4 |

## Figure S15-3

## dienoate

|                           |                |       |      |                |       |      |
|---------------------------|----------------|-------|------|----------------|-------|------|
| 9d(Na)-Cu-allenyl         | -3681.64220587 | 0.0   | 0.0  | -3683.60017309 | 0.0   | 0.0  |
| PA-9d(Na)-ts(1,6major)_01 | -3681.65973748 | -11.0 | 9.3  | -3683.61772924 | -11.0 | 9.3  |
| PA-9d(Na)-ts(1,6major)_02 | -3681.65890032 | -10.5 | 9.0  | -3683.61645791 | -10.2 | 9.3  |
| PA-9d(Na)-ts(1,6major)_03 | -3681.65937536 | -10.8 | 9.1  | -3683.61687054 | -10.5 | 9.4  |
| PA-9d(Na)-ts(1,6major)_04 | -3681.66260080 | -12.8 | 7.3  | -3683.61794415 | -11.2 | 8.9  |
| PA-9d(Na)-ts(1,6major)_05 | -3681.66144561 | -12.1 | 8.6  | -3683.61750955 | -10.9 | 9.8  |
| PA-9d(Na)-ts(1,6major)_06 | -3681.65888860 | -10.5 | 9.8  | -3683.61647690 | -10.2 | 10.0 |
| PA-9d(Na)-ts(1,6major)_07 | -3681.65884611 | -10.4 | 10.0 | -3683.61639249 | -10.2 | 10.2 |
| PA-9d(Na)-ts(1,6major)_08 | -3681.66223765 | -12.6 | 8.1  | -3683.61749440 | -10.9 | 9.9  |
| PA-9d(Na)-ts(1,6major)_09 | -3681.66033409 | -11.4 | 9.3  | -3683.61641726 | -10.2 | 10.4 |
| PA-9d(Na)-ts(1,6major)_10 | -3681.65939834 | -10.8 | 9.5  | -3683.61511300 | -9.4  | 10.9 |
| PA-9d(Na)-ts(1,6major)_11 | -3681.65521086 | -8.2  | 11.6 | -3683.61179052 | -7.3  | 12.5 |
| PA-9d(Na)-ts(1,6major)_12 | -3681.65946037 | -10.8 | 9.7  | -3683.61514765 | -9.4  | 11.1 |
| PA-9d(Na)-ts(1,6major)_13 | -3681.65382618 | -7.3  | 13.0 | -3683.61096278 | -6.8  | 13.5 |
| PA-9d(Na)-ts(1,6major)_14 | -3681.64283348 | -0.4  | 20.5 | -3683.60120102 | -0.6  | 20.3 |
| PA-9d(Na)-ts(1,6major)_15 | -3681.63944632 | 1.7   | 20.5 | -3683.59810702 | 1.3   | 20.1 |
| PA-9d(Na)-ts(1,6major)_16 | -3681.64375937 | -1.0  | 19.6 | -3683.60113754 | -0.6  | 19.9 |
| PA-9d(Na)-ts(1,6major)_17 | -3681.63816402 | 2.5   | 23.7 | -3683.59756976 | 1.6   | 22.8 |
| PA-9d(Na)-ts(1,6minor)_01 | -3681.65761381 | -9.7  | 9.1  | -3683.61518754 | -9.4  | 9.4  |
| PA-9d(Na)-ts(1,6minor)_02 | -3681.65709706 | -9.3  | 10.4 | -3683.61505028 | -9.3  | 10.4 |
| PA-9d(Na)-ts(1,6minor)_03 | -3681.65697203 | -9.3  | 11.1 | -3683.61400305 | -8.7  | 11.7 |
| PA-9d(Na)-ts(1,6minor)_04 | -3681.65704203 | -9.3  | 11.4 | -3683.61408660 | -8.7  | 12.0 |
| PA-9d(Na)-ts(1,6minor)_05 | -3681.65704203 | -9.3  | 11.4 | -3683.61408657 | -8.7  | 12.0 |
| PA-9d(Na)-ts(1,6minor)_06 | -3681.65634115 | -8.9  | 12.1 | -3683.61353101 | -8.4  | 12.6 |
| PA-9d(Na)-ts(1,6minor)_07 | -3681.65643037 | -8.9  | 12.6 | -3683.61364680 | -8.5  | 13.0 |
| PA-9d(Na)-ts(1,6minor)_08 | -3681.64986214 | -4.8  | 14.9 | -3683.60761370 | -4.7  | 15.0 |
| PA-9d(Na)-ts(1,6minor)_09 | -3681.64972412 | -4.7  | 15.5 | -3683.60862100 | -5.3  | 14.9 |

## Figure S15-4

|                   |                |     |     |                |     |     |
|-------------------|----------------|-----|-----|----------------|-----|-----|
| 9b(Na)-Cu-allenyl | -3681.63854301 | 0.0 | 0.0 | -3683.59431594 | 0.0 | 0.0 |
|-------------------|----------------|-----|-----|----------------|-----|-----|

|                           |                |      |      |                |       |      |
|---------------------------|----------------|------|------|----------------|-------|------|
| PA-9b(Na)-ts(1,6major)_01 | -3681.65260731 | -8.8 | 9.1  | -3683.61172700 | -10.9 | 7.0  |
| PA-9b(Na)-ts(1,6major)_02 | -3681.65350670 | -9.4 | 10.6 | -3683.61137773 | -10.7 | 9.3  |
| PA-9b(Na)-ts(1,6major)_03 | -3681.65255339 | -8.8 | 11.2 | -3683.61104870 | -10.5 | 9.5  |
| PA-9b(Na)-ts(1,6major)_04 | -3681.65069168 | -7.6 | 13.7 | -3683.60668217 | -7.8  | 13.5 |
| PA-9b(Na)-ts(1,6major)_05 | -3681.63939099 | -0.5 | 20.2 | -3683.59897771 | -2.9  | 17.8 |
| PA-9b(Na)-ts(1,6minor)_01 | -3681.64719232 | -5.4 | 15.3 | -3683.60512824 | -6.8  | 13.9 |
| PA-9b(Na)-ts(1,6minor)_02 | -3681.64857584 | -6.3 | 14.2 | -3683.60598018 | -7.3  | 13.2 |
| PA-9b(Na)-ts(1,6minor)_03 | -3681.64600285 | -4.7 | 15.5 | -3683.60428570 | -6.3  | 13.9 |
| PA-9b(Na)-ts(1,6minor)_04 | -3681.64668739 | -5.1 | 16.3 | -3683.60472536 | -6.5  | 14.9 |
| PA-9b(Na)-ts(1,6minor)_05 | -3681.64538389 | -4.3 | 17.4 | -3683.60301713 | -5.5  | 16.2 |
| PA-9b(Na)-ts(1,6minor)_06 | -3681.64305388 | -2.8 | 18.1 | -3683.60057987 | -3.9  | 17.0 |
| PA-9b(Na)-ts(1,6minor)_07 | -3681.64509327 | -4.1 | 17.8 | -3683.60087894 | -4.1  | 17.8 |
| PA-9b(Na)-ts(1,6minor)_08 | -3681.64444133 | -3.7 | 18.6 | -3683.60061722 | -4.0  | 18.3 |

## Figure S15-5

|                              |                |       |      |                |       |      |
|------------------------------|----------------|-------|------|----------------|-------|------|
| 9d(NaOPh)-Cu-allyl_01        | -4439.93821085 | 0.0   | 0.0  | -4442.55008509 | 0.0   | 0.0  |
| AA-9d(NaOPh)-ts(1,6major)_01 | -4439.98449643 | -29.0 | -5.1 | -4442.59032238 | -25.2 | -1.4 |
| AA-9d(NaOPh)-ts(1,6major)_02 | -4439.98383773 | -28.6 | -4.6 | -4442.58789779 | -23.7 | 0.3  |
| AA-9d(NaOPh)-ts(1,6minor)_01 | -4439.97369382 | -22.3 | 0.1  | -4442.58185530 | -19.9 | 2.5  |
| AA-9d(NaOPh)-ts(1,6minor)_02 | -4439.97714033 | -24.4 | -0.7 | -4442.58408048 | -21.3 | 2.4  |
| AA-9d(NaOPh)-ts(1,6minor)_03 | -4439.97464467 | -22.9 | 0.6  | -4442.58197373 | -20.0 | 3.5  |
| AA-9d(NaOPh)-ts(1,6minor)_04 | -4439.97785218 | -24.9 | -1.6 | -4442.58201364 | -20.0 | 3.2  |
| AA-9d(NaOPh)-ts(1,6minor)_05 | -4439.97783459 | -24.9 | -0.8 | -4442.58236006 | -20.3 | 3.9  |
| AA-9d(NaOPh)-ts(1,6minor)_06 | -4439.97172787 | -21.0 | 2.7  | -4442.57893097 | -18.1 | 5.6  |
| AA-9d(NaOPh)-ts(1,6minor)_07 | -4439.97079085 | -20.4 | 4.0  | -4442.58073697 | -19.2 | 5.2  |

## Figure S15-6

|                              |                |       |      |                |       |     |
|------------------------------|----------------|-------|------|----------------|-------|-----|
| 9b(NaOPh)-Cu-allyl_01        | -4439.93428626 | 0.0   | 0.0  | -4442.54510511 | 0.0   | 0.0 |
| AA-9b(NaOPh)-ts(1,6major)_01 | -4439.96919497 | -21.9 | 0.4  | -4442.57882366 | -21.2 | 1.2 |
| AA-9b(NaOPh)-ts(1,6major)_02 | -4439.97273296 | -24.1 | -1.6 | -4442.57763165 | -20.4 | 2.1 |
| AA-9b(NaOPh)-ts(1,6minor)_01 | -4439.96841951 | -21.4 | 0.0  | -4442.57797333 | -20.6 | 0.8 |
| AA-9b(NaOPh)-ts(1,6minor)_02 | -4439.96874244 | -21.6 | 0.5  | -4442.57714867 | -20.1 | 2.0 |
| AA-9b(NaOPh)-ts(1,6minor)_03 | -4439.96841962 | -21.4 | 1.3  | -4442.57797329 | -20.6 | 2.1 |
| AA-9b(NaOPh)-ts(1,6minor)_04 | -4439.96875104 | -21.6 | 2.1  | -4442.57568461 | -19.2 | 4.5 |

| Figure S15-7               |                |       |      |                |       |      |
|----------------------------|----------------|-------|------|----------------|-------|------|
| <b>dienoate</b>            |                |       |      |                |       |      |
| 9d(Na)-Cu-allyl_01         | -4132.59920742 | 0.0   | 0.0  | -4134.96284992 | 0.0   | 0.0  |
| AA-9d(Na)-ts(1,6major)_01  | -4132.62729388 | -17.6 | 3.4  | -4134.98781113 | -15.7 | 5.3  |
| AA-9d(Na)-ts(1,6major)_02  | -4132.62893033 | -18.7 | 4.0  | -4134.98845938 | -16.1 | 6.6  |
| AA-9d(Na)-ts(1,6major)_03  | -4132.62631562 | -17.0 | 6.2  | -4134.98510346 | -14.0 | 9.3  |
| AA-9d(Na)-ts(1,6minor)_01  | -4132.62446762 | -15.9 | 6.1  | -4134.98513729 | -14.0 | 8.0  |
| AA-9d(Na)-ts(1,6minor)_02  | -4132.62440344 | -15.8 | 6.5  | -4134.98518004 | -14.0 | 8.3  |
| AA-9d(Na)-ts(1,6minor)_03  | -4132.61477818 | -9.8  | 11.8 | -4134.97855006 | -9.9  | 11.7 |
| AA-9d(Na)-ts(1,6minor)_04  | -4132.62390286 | -15.5 | 7.1  | -4134.98419154 | -13.4 | 9.2  |
| AA-9d(Na)-ts(1,6minor)_05  | -4132.62110301 | -13.7 | 8.3  | -4134.98256014 | -12.4 | 9.7  |
| AA-9d(Na)-ts(1,6minor)_06  | -4132.61285936 | -8.6  | 13.7 | -4134.97849931 | -9.8  | 12.5 |
| AA-9d(Na)-ts(1,6minor)_07  | -4132.61977727 | -12.9 | 9.3  | -4134.98024852 | -10.9 | 11.3 |
| Figure S15-8               |                |       |      |                |       |      |
| 9b(Na)-Cu-allyl_01         | -4132.59314173 | 0.0   | 0.0  | -4134.95669225 | 0.0   | 0.0  |
| AA-9b(Na)-ts(1,6major)_01  | -4132.62290671 | -18.7 | 4.0  | -4134.98408524 | -17.2 | 5.5  |
| AA-9b(Na)-ts(1,6major)_02  | -4132.62647896 | -20.9 | 2.5  | -4134.98600401 | -18.4 | 5.0  |
| AA-9b(Na)-ts(1,6major)_03  | -4132.61861915 | -16.0 | 7.0  | -4134.98236549 | -16.1 | 6.9  |
| AA-9b(Na)-ts(1,6major)_04  | -4132.61684962 | -14.9 | 10.9 | -4134.97573346 | -11.9 | 13.8 |
| AA-9b(Na)-ts(1,6minor)_01  | -4132.61446188 | -13.4 | 9.1  | -4134.97988308 | -14.6 | 7.9  |
| AA-9b(Na)-ts(1,6minor)_02  | -4132.60984167 | -10.5 | 11.7 | -4134.97650355 | -12.4 | 9.7  |
| AA-9b(Na)-ts(1,6minor)_03  | -4132.62176638 | -18.0 | 4.9  | -4134.98120906 | -15.4 | 7.5  |
| AA-9b(Na)-ts(1,6minor)_04  | -4132.62181060 | -18.0 | 5.2  | -4134.98154297 | -15.6 | 7.6  |
| AA-9b(Na)-ts(1,6minor)_05  | -4132.61576881 | -14.2 | 10.0 | -4134.97687655 | -12.7 | 11.6 |
| Figure S15-9               |                |       |      |                |       |      |
| <b>NaOPh</b>               |                |       |      |                |       |      |
| <b>(PhO)2BpinNa</b>        |                |       |      |                |       |      |
| <b>PhOBpin</b>             |                |       |      |                |       |      |
| <b>dienoate</b>            |                |       |      |                |       |      |
| 9d(Naborate)-Cu-allenyl_01 | -4399.49862226 | 0.0   | 0.0  | -4402.03434163 | 0.0   | 0.0  |
| 9d(Naborate)-Cu-allenyl_02 | -4399.49675768 | 1.2   | 2.1  | -4402.03365706 | 0.4   | 1.3  |
| 9d(Naborate)-Cu-allenyl_03 | -4399.49629242 | 1.5   | 3.2  | -4402.03302937 | 0.8   | 2.6  |
| 9d(Naborate)-Cu-allenyl_04 | -4399.50796677 | -5.9  | -0.3 | -4402.04034648 | -3.8  | 1.8  |
| 9d(Naborate)-Cu-allenyl_05 | -4399.49480647 | 2.4   | 5.6  | -4402.03158165 | 1.7   | 5.0  |

|                                        |                |       |      |                |       |      |
|----------------------------------------|----------------|-------|------|----------------|-------|------|
| <b>9d(Naborate)-Cu-allenyl_06</b>      | -4399.49920993 | -0.4  | 3.3  | -4402.03341646 | 0.6   | 4.3  |
| <b>9d(Naborate)-Cu-allenyl_07</b>      | -4399.49486942 | 2.4   | 5.8  | -4402.03162241 | 1.7   | 5.1  |
| <b>PA-9b(Naborate)-ts(1,6major)_01</b> | -4399.51879555 | -12.7 | 10.6 | -4402.05705381 | -14.3 | 9.0  |
| <b>PA-9b(Naborate)-ts(1,6major)_02</b> | -4399.51710928 | -11.6 | 10.6 | -4402.05467305 | -12.8 | 9.5  |
| <b>PA-9b(Naborate)-ts(1,6major)_03</b> | -4399.51734929 | -11.8 | 12.2 | -4402.05584456 | -13.5 | 10.5 |
| <b>PA-9b(Naborate)-ts(1,6major)_04</b> | -4399.51081372 | -7.7  | 15.0 | -4402.04971516 | -9.6  | 13.0 |
| <b>PA-9b(Naborate)-ts(1,6major)_05</b> | -4399.51143249 | -8.0  | 14.1 | -4402.04943819 | -9.5  | 12.6 |
| <b>PA-9b(Naborate)-ts(1,6major)_06</b> | -4399.51521676 | -10.4 | 13.6 | -4402.05084347 | -10.4 | 13.6 |
| <b>PA-9b(Naborate)-ts(1,6major)_07</b> | -4399.51421050 | -9.8  | 14.0 | -4402.05089868 | -10.4 | 13.4 |
| <b>PA-9b(Naborate)-ts(1,6major)_08</b> | -4399.51113742 | -7.9  | 17.3 | -4402.04997309 | -9.8  | 15.3 |
| <b>PA-9b(Naborate)-ts(1,6major)_09</b> | -4399.51442068 | -9.9  | 14.8 | -4402.05176313 | -10.9 | 13.8 |
| <b>PA-9b(Naborate)-ts(1,6major)_10</b> | -4399.51430481 | -9.8  | 15.2 | -4402.05168421 | -10.9 | 14.1 |
| <b>9d-Cu-allenyl</b>                   | -3519.91942960 | 0.0   | 0.0  | -3521.86429899 | 0.0   | 0.0  |
| <b>PA-9b-ts(1,6major)_01</b>           | -3519.92080559 | -0.9  | 19.7 | -3521.86686895 | -1.6  | 19.0 |
| <b>PA-9b-ts(1,6major)_02</b>           | -3519.92077687 | -0.8  | 18.9 | -3521.86622676 | -1.2  | 18.5 |
| <b>PA-9b-ts(1,6major)_03</b>           | -3519.92187182 | -1.5  | 19.1 | -3521.86662225 | -1.5  | 19.2 |
| <b>PA-9b-ts(1,6major)_04</b>           | -3519.91844085 | 0.6   | 21.5 | -3521.86587153 | -1.0  | 19.8 |
| <b>PA-9b-ts(1,6major)_05</b>           | -3519.91926994 | 0.1   | 22.1 | -3521.86576011 | -0.9  | 21.0 |

E(sp,sum) ..... single point electronic energy in Hartree with Def2TZVPP basis set in thf(SMD) after mass balance

$\Delta E(\text{sp})$  ..... relative single point electronic energy in kcal/mol with Def2TZVPP basis set in thf(SMD)

$\Delta G(\text{sp})$  ..... relative single point free energy in kcal/mol with Def2TZVPP basis set in thf(SMD)

$$[\Delta G(\text{sp}) = \Delta E(\text{sp})/\text{Def2TZVPP} + \Delta G_{\text{corr}}/\text{Def2SVP}]$$

Table S4. Single point energies in Figures S1-1–S15-9 with BP86-D3BJ and PBE0-D3BJ

| structure                    | BP86-D3BJ/Def2TZVPP <sub>thf(SMD)</sub> |                 |                 | PBE0-D3BJ/Def2TZVPP <sub>thf(SMD)</sub> |                 |                 |
|------------------------------|-----------------------------------------|-----------------|-----------------|-----------------------------------------|-----------------|-----------------|
|                              | E(sp,sum)                               | $\Delta E$ (sp) | $\Delta G$ (sp) | E(sp,sum)                               | $\Delta E$ (sp) | $\Delta G$ (sp) |
|                              | [hartree]                               | [kcal/mol]      | [kcal/mol]      | [hartree]                               | [kcal/mol]      | [kcal/mol]      |
| <b>Figure S1-1</b>           |                                         |                 |                 |                                         |                 |                 |
| dienoate                     |                                         |                 |                 |                                         |                 |                 |
| PhOH                         |                                         |                 |                 |                                         |                 |                 |
| NaOPh                        |                                         |                 |                 |                                         |                 |                 |
| tBuOH                        |                                         |                 |                 |                                         |                 |                 |
| NaOtBu                       |                                         |                 |                 |                                         |                 |                 |
| PhOBpin                      |                                         |                 |                 |                                         |                 |                 |
| (PhO)2BpinNa                 |                                         |                 |                 |                                         |                 |                 |
| 9d-Cu-allenyl                | -3918.11090782                          | 0.0             | 0.0             | -3914.94154622                          | 0.0             | 0.0             |
| PA-9d(Na)-ts(1,6major)       | -3918.17489209                          | -40.2           | -18.2           | -3914.98796143                          | -29.1           | -7.1            |
| 9d-Cu-allenyl                | -3991.96461045                          | 0.0             | 0.0             | -3988.71129340                          | 0.0             | 0.0             |
| PA-9d(Na)-ts(1,6major)       | -3992.00528960                          | -25.5           | -3.8            | -3988.73314230                          | -13.7           | 8.0             |
| 9d-Cu-allenyl                | -3991.96461045                          | 0.0             | 0.0             | -3988.71129340                          | 0.0             | 0.0             |
| PA-9d(NaOPh)-ts(1,6major)    | -3992.05166190                          | -54.6           | -16.8           | -3988.77951579                          | -42.8           | -5.0            |
| 9d-Cu-allenyl                | -3522.59908511                          | 0.0             | 0.0             | -3519.82155195                          | 0.0             | 0.0             |
| PA-9d-ts(1,6major)           | -3522.62439727                          | -15.9           | 3.8             | -3519.83030742                          | -5.5            | 14.2            |
| 9d-Cu-allenyl                | -4710.48441746                          | 25.9            | 9.6             | -4706.38741845                          | 25.6            | 9.3             |
| 9d-Cu-allenyl                | -4710.52564785                          | 0.0             | 0.0             | -4706.42823267                          | 0.0             | 0.0             |
| PA-9d(Naborate)-ts(1,6major) | -4710.58756776                          | -38.9           | -14.8           | -4706.47446297                          | -29.0           | -4.9            |
| <b>Figure S2-1</b>           |                                         |                 |                 |                                         |                 |                 |
| PA-9d(NaOPh)-prod(1,6major)  | -3992.07530973                          | -42.7           | -19.7           | -3988.82001382                          | -44.7           | -21.7           |
| PA-9d(NaOPh)-ts(1,6major)    | -3992.05166190                          | -27.9           | -6.6            | -3988.77951579                          | -19.3           | 2.0             |
| PA-9d(NaOPh)-pc(1,6major)    | -3992.05835054                          | -32.1           | -11.4           | -3988.78784260                          | -24.5           | -3.9            |
| 9d(NaOPh)-Cu-allenyl         | -3992.00726325                          | 0.0             | 0.0             | -3988.74876006                          | 0.0             | 0.0             |
| 9b(NaOPh)-Cu-allenyl         | -3991.99949353                          | 0.0             | 0.0             | -3988.74305227                          | 0.0             | 0.0             |
| PA-9b(NaOPh)-pc(1,6major)    | -3992.05529031                          | -35.0           | -14.6           | -3988.78360162                          | -25.4           | -5.0            |
| PA-9b(NaOPh)-ts(1,6major)    | -3992.04887398                          | -31.0           | -10.2           | -3988.77567306                          | -20.5           | 0.3             |
| PA-9b(NaOPh)-prod(1,6major)  | -3992.06511394                          | -41.2           | -18.8           | -3988.81204048                          | -43.3           | -20.9           |

|                             |                |       |       |                |       |       |
|-----------------------------|----------------|-------|-------|----------------|-------|-------|
| PA-9d(NaOPh)-prod(1,6minor) | -3992.06469260 | -36.0 | -14.1 | -3988.81025471 | -38.6 | -16.7 |
| PA-9d(NaOPh)-ts(1,6minor)   | -3992.04916265 | -26.3 | -6.0  | -3988.77649127 | -17.4 | 2.9   |
| PA-9d(NaOPh)-pc(1,6minor)   | -3992.05705222 | -31.2 | -11.3 | -3988.78432931 | -22.3 | -2.4  |
| 9d(NaOPh)-Cu-allenyl        | -3992.00726325 | 0.0   | 0.0   | -3988.74876006 | 0.0   | 0.0   |
| 9b(NaOPh)-Cu-allenyl        | -3991.99949353 | 0.0   | 0.0   | -3988.74305227 | 0.0   | 0.0   |
| PA-9b(NaOPh)-pc(1,6minor)   | -3992.04926967 | -31.2 | -10.9 | -3988.77733345 | -21.5 | -1.2  |
| PA-9b(NaOPh)-ts(1,6minor)   | -3992.04085109 | -26.0 | -5.1  | -3988.76818927 | -15.8 | 5.1   |
| PA-9b(NaOPh)-prod(1,6minor) | -3992.06245070 | -39.5 | -16.7 | -3988.80757473 | -40.5 | -17.6 |

## Figure S3-1

|                             |                |       |       |                |       |       |
|-----------------------------|----------------|-------|-------|----------------|-------|-------|
| AA-9d(NaOPh)-prod(1,6major) | -4443.53956791 | -46.9 | -20.9 | -4439.75052149 | -48.0 | -22.0 |
| AA-9d(NaOPh)-ts(1,6major)   | -4443.52133333 | -35.4 | -11.5 | -4439.71513797 | -25.8 | -1.9  |
| AA-9d(NaOPh)-pc(1,6major)   | -4443.52170507 | -35.7 | -12.4 | -4439.71589768 | -26.2 | -3.0  |
| 9d(NaOPh)-Cu-allyl          | -4443.46486884 | 0.0   | 0.0   | -4439.67409117 | 0.0   | 0.0   |
| 9b(NaOPh)-Cu-allyl          | -4443.46188377 | 0.0   | 0.0   | -4439.67037956 | 0.0   | 0.0   |
| AA-9b(NaOPh)-pc(1,6major)   | -4443.51261718 | -31.8 | -11.9 | -4439.70830901 | -23.8 | -3.8  |
| AA-9b(NaOPh)-ts(1,6major)   | -4443.51286576 | -32.0 | -9.6  | -4439.70780214 | -23.5 | -1.1  |
| AA-9b(NaOPh)-prod(1,6major) | -4443.53141611 | -43.6 | -18.6 | -4439.74246516 | -45.2 | -20.2 |
| AA-9d(NaOPh)-prod(1,6minor) | -4443.52846650 | -39.9 | -16.6 | -4439.74052836 | -41.7 | -18.4 |
| AA-9d(NaOPh)-ts(1,6minor)   | -4443.51357738 | -30.6 | -8.2  | -4439.70826334 | -21.4 | 1.0   |
| AA-9d(NaOPh)-pc(1,6minor)   | -4443.51439359 | -31.1 | -9.7  | -4439.70966160 | -22.3 | -1.0  |
| 9d(NaOPh)-Cu-allyl          | -4443.46486884 | 0.0   | 0.0   | -4439.67409117 | 0.0   | 0.0   |
| 9b(NaOPh)-Cu-allyl          | -4443.46188377 | 0.0   | 0.0   | -4439.67037956 | 0.0   | 0.0   |
| AA-9b(NaOPh)-pc(1,6minor)   | -4443.50943727 | -29.8 | -7.2  | -4439.70384962 | -21.0 | 1.6   |
| AA-9b(NaOPh)-ts(1,6minor)   | -4443.51094440 | -30.8 | -9.3  | -4439.70458757 | -21.5 | 0.0   |
| AA-9b(NaOPh)-prod(1,6minor) | -4135.86950359 | -43.8 | -17.4 | -4132.44864709 | -45.4 | -19.0 |

## Figure S4-1

|                          |                |       |       |                |       |       |
|--------------------------|----------------|-------|-------|----------------|-------|-------|
| PA-9d(Na)-prod(1,6major) | -3684.41094470 | -42.0 | -19.1 | -3681.52395309 | -42.9 | -20.0 |
| PA-9d(Na)-ts(1,6major)   | -3684.38683272 | -26.9 | -7.4  | -3681.48137249 | -16.2 | 3.3   |
| PA-9d(Na)-pc(1,6major)   | -3684.39356949 | -31.1 | -11.3 | -3681.48976031 | -21.5 | -1.7  |
| 9d(Na)-Cu-allenyl        | -3684.34400351 | 0.0   | 0.0   | -3681.45554823 | 0.0   | 0.0   |
| 9b(Na)-Cu-allenyl        | -3684.34130309 | 0.0   | 0.0   | -3681.45127568 | 0.0   | 0.0   |
| PA-9b(Na)-pc(1,6major)   | -3684.38619465 | -28.2 | -10.3 | -3681.48365822 | -20.3 | -2.4  |
| PA-9b(Na)-ts(1,6major)   | -3684.38105171 | -24.9 | -7.0  | -3681.47660469 | -15.9 | 2.1   |
| PA-9b(Na)-prod(1,6major) | -3684.39894208 | -36.2 | -16.0 | -3681.51485980 | -39.9 | -19.8 |

|                          |                |       |       |                |       |       |
|--------------------------|----------------|-------|-------|----------------|-------|-------|
| PA-9d(Na)-prod(1,6minor) | -3684.41356914 | -43.7 | -21.4 | -3681.52671950 | -44.7 | -22.5 |
| PA-9d(Na)-ts(1,6minor)   | -3684.38319287 | -24.6 | -5.8  | -3681.47868489 | -14.5 | 4.3   |
| PA-9d(Na)-pc(1,6minor)   | -3684.38857507 | -28.0 | -9.2  | -3681.48683895 | -19.6 | -0.8  |
| 9d(Na)-Cu-allenyl        | -3684.34400351 | 0.0   | 0.0   | -3681.45554823 | 0.0   | 0.0   |
| 9b(Na)-Cu-allenyl        | -3684.34130309 | 0.0   | 0.0   | -3681.45127568 | 0.0   | 0.0   |
| PA-9b(Na)-pc(1,6minor)   | -3684.38100480 | -24.9 | -6.4  | -3681.47896844 | -17.4 | 1.2   |
| PA-9b(Na)-ts(1,6minor)   | -3684.37346564 | -20.2 | 0.5   | -3681.46878764 | -11.0 | 9.7   |
| PA-9b(Na)-prod(1,6minor) | -3684.39096760 | -31.2 | -11.0 | -3681.50752342 | -35.3 | -15.1 |

## Figure S5-1

|                          |                |       |       |                |       |       |
|--------------------------|----------------|-------|-------|----------------|-------|-------|
| AA-9d(Na)-prod(1,6major) | -4135.86786923 | -39.2 | -13.5 | -4132.44595292 | -40.5 | -14.7 |
| AA-9d(Na)-ts(1,6major)   | -4135.84759100 | -26.5 | -5.5  | -4132.41066897 | -18.3 | 2.6   |
| AA-9d(Na)-pc(1,6major)   | -4135.84905559 | -27.4 | -5.4  | -4132.41263431 | -19.6 | 2.5   |
| 9d(Na)-Cu-allyl          | -4135.80539302 | 0.0   | 0.0   | -4132.38143186 | 0.0   | 0.0   |
| 9b(Na)-Cu-allyl          | -4135.79970911 | 0.0   | 0.0   | -4132.37621802 | 0.0   | 0.0   |
| AA-9b(Na)-pc(1,6major)   | -4135.84311002 | -27.2 | -5.4  | -4132.40753350 | -19.7 | 2.2   |
| AA-9b(Na)-ts(1,6major)   | -4135.84350716 | -27.5 | -4.8  | -4132.40738079 | -19.6 | 3.1   |
| AA-9b(Na)-prod(1,6major) | -4135.86736486 | -42.5 | -17.3 | -4132.44644449 | -44.1 | -18.9 |
| AA-9d(Na)-prod(1,6minor) | -4135.87246735 | -42.1 | -21.1 | -4132.45278736 | -44.8 | -23.7 |
| AA-9d(Na)-ts(1,6minor)   | -4135.84493698 | -24.8 | -2.8  | -4132.40740722 | -16.3 | 5.7   |
| AA-9d(Na)-pc(1,6minor)   | -4135.84589569 | -25.4 | -4.7  | -4132.40968798 | -17.7 | 3.0   |
| 9d(Na)-Cu-allyl          | -4135.80539302 | 0.0   | 0.0   | -4132.38143186 | 0.0   | 0.0   |
| 9b(Na)-Cu-allyl          | -4135.79970911 | 0.0   | 0.0   | -4132.37621802 | 0.0   | 0.0   |
| AA-9b(Na)-pc(1,6minor)   | -4135.84133823 | -26.1 | -3.7  | -4132.40504157 | -18.1 | 4.3   |
| AA-9b(Na)-ts(1,6minor)   | -4135.84124147 | -26.1 | -3.6  | -4132.40442562 | -17.7 | 4.8   |
| AA-9b(Na)-prod(1,6minor) | -4135.86950359 | -43.8 | -17.4 | -4132.44864709 | -45.4 | -19.0 |

## Figure S6-1

thf  
PMe3  
Me2NHC  
NaOPh  
NaOtBu  
dienoate  
dienoate-NaOPh  
dienoate-NaOtBu

|                          |                |       |       |                |       |       |
|--------------------------|----------------|-------|-------|----------------|-------|-------|
| Me2NHC-Cu-allenyl        | -3069.59080568 | -9.5  | -8.6  | -3067.45525044 | -8.7  | -7.8  |
| PMe3-Cu-allenyl          | -3069.57561019 | 0.0   | 0.0   | -3067.44142451 | 0.0   | 0.0   |
| thf-Cu-allenyl           | -3069.54673409 | 18.1  | 18.3  | -3067.41474895 | 16.7  | 16.9  |
| PA-NaOPh-prod(1,6)       | -3069.59842850 | -14.3 | -5.2  | -3067.46931832 | -17.5 | -8.4  |
| PA-NaOPh-ts(1,6)         | -3069.58013041 | -2.8  | 5.4   | -3067.43327212 | 5.1   | 13.4  |
| PA-NaOPh-ed(1,6)         | -3069.58665011 | -6.9  | 0.3   | -3067.44103235 | 0.2   | 7.4   |
| NaOPh-Cu-allenyl         | -3069.53550015 | 25.2  | 14.3  | -3067.39977608 | 26.1  | 15.3  |
| PA-NaOPh-ed(1,4)         | -3069.58403683 | -5.3  | 3.1   | -3067.44292944 | -0.9  | 7.4   |
| PA-NaOPh-ts(1,4)         | -3069.56833146 | 4.6   | 12.2  | -3067.42415694 | 10.8  | 18.5  |
| PA-NaOPh-prod(1,4)       | -3069.60344299 | -17.5 | -8.1  | -3067.47500051 | -21.1 | -11.7 |
| Me2NHC-Cu-allenyl        | -2995.73461710 | -9.5  | -8.6  | -2993.68295515 | -8.7  | -7.8  |
| PMe3-Cu-allenyl          | -2995.71942161 | 0.0   | 0.0   | -2993.66912922 | 0.0   | 0.0   |
| thf-Cu-allenyl           | -2995.69054551 | 18.1  | 18.3  | -2993.64245366 | 16.7  | 16.9  |
| PA-NaOtBu-prod(1,6)      | -2995.75655758 | -23.3 | -14.2 | -2993.71082755 | -26.2 | -17.1 |
| PA-NaOtBu-ts(1,6)        | -2995.73852416 | -12.0 | -5.1  | -2993.67448627 | -3.4  | 3.5   |
| PA-NaOtBu-ed(1,6)        | -2995.74606412 | -16.7 | -11.3 | -2993.68374293 | -9.2  | -3.7  |
| NaOtBu-Cu-allenyl        | -2995.69813227 | 13.4  | 3.2   | -2993.64570406 | 14.7  | 4.6   |
| PA-NaOtBu-ed(1,4)        | -2995.73717559 | -11.1 | -7.0  | -2993.68069354 | -7.3  | -3.1  |
| PA-NaOtBu-ts(1,4)        | -2995.72814855 | -5.5  | -1.2  | -2993.66826570 | 0.5   | 4.8   |
| PA-NaOtBu-prod(1,4)      | -2995.76460604 | -28.4 | -19.4 | -2993.71891227 | -31.2 | -22.3 |
| <b>Figure S7-1</b>       |                |       |       |                |       |       |
| Me2NHC-Cu-allyl          | -3357.79024157 | 0.0   | 0.0   | -3355.22323589 | 0.0   | 0.0   |
| AA-Me2NHC-pc(1,6major)   | -3357.82753103 | -23.4 | -5.4  | -3355.24932609 | -16.4 | 1.6   |
| AA-Me2NHC-ts(1,6major)   | -3357.82409254 | -21.2 | -1.3  | -3355.24457841 | -13.4 | 6.6   |
| AA-Me2NHC-prod(1,6major) | -3357.85111123 | -38.2 | -14.9 | -3355.28461943 | -38.5 | -15.2 |
| Me2NHC-Cu-allyl          | -3357.79024157 | 0.0   | 0.0   | -3355.22323589 | 0.0   | 0.0   |
| AA-Me2NHC-pc(1,6minor)   | -3357.82309356 | -20.6 | -1.2  | -3355.24537984 | -13.9 | 5.5   |
| AA-Me2NHC-ts(1,6minor)   | -3357.81467574 | -15.3 | 4.7   | -3355.23498225 | -7.4  | 12.7  |
| AA-Me2NHC-prod(1,6minor) | -3357.84522718 | -34.5 | -11.4 | -3355.27754178 | -34.1 | -11.0 |
| <b>Figure S8-1</b>       |                |       |       |                |       |       |
| dienoate                 |                |       |       |                |       |       |
| SIMes-Cu-allenyl         | -3526.01532262 | 0.0   | 0.0   | -3523.21633309 | 0.0   | 0.0   |
| PA-SIMes-ed(1,6)         | -3526.04718255 | -20.0 | 1.2   | -3523.23443484 | -11.4 | 9.9   |



|                       |                |       |      |                |       |      |
|-----------------------|----------------|-------|------|----------------|-------|------|
| PA-SIMes-ts(1,6)      | -3526.03744920 | -13.9 | 7.2  | -3523.22267278 | -4.0  | 17.1 |
| PA-SIMes-prod(1,6)    | -3526.05330773 | -23.8 | -0.8 | -3523.25814644 | -26.2 | -3.2 |
| PA-SIMes-ed(1,4AA)    | -3526.04720639 | -20.0 | 1.1  | -3523.23444703 | -11.4 | 9.7  |
| PA-SIMes-ts(1,4AA)    | -3526.01827797 | -1.9  | 18.4 | -3523.20822531 | 5.1   | 25.3 |
| PA-SIMes-prod(1,4AA)  | -3526.04726814 | -20.0 | -0.5 | -3523.24989283 | -21.1 | -1.5 |
| PA-SIMes-ed(1,4)      | -3526.02948481 | -8.9  | 9.9  | -3523.22549882 | -5.8  | 13.0 |
| PA-SIMes-ts(1,4)      | -3526.01415047 | 0.7   | 18.0 | -3523.20369474 | 7.9   | 25.2 |
| PA-SIMes-prod(1,4)    | -3526.03240781 | -10.7 | 10.8 | -3523.23557877 | -12.1 | 9.5  |
| PPh3-Cu-allenyl       | -3636.85858267 | 0.0   | 0.0  | -3634.17271872 | 0.0   | 0.0  |
| PA-PPh3-ed(1,6)       | -3636.88809120 | -18.5 | -1.0 | -3634.18833636 | -9.8  | 7.7  |
| PA-PPh3-ts(1,6)       | -3636.87766146 | -12.0 | 7.0  | -3634.17494190 | -1.4  | 17.6 |
| PA-PPh3-prod(1,6)     | -3636.89484986 | -22.8 | -2.7 | -3634.21056135 | -23.7 | -3.7 |
| PA-PPh3-ed(1,4AA)     | -3636.88864094 | -18.9 | -2.6 | -3634.18879181 | -10.1 | 6.1  |
| PA-PPh3-ts(1,4AA)     | -3636.85664773 | 1.2   | 17.0 | -3634.16096722 | 7.4   | 23.1 |
| PA-PPh3-prod(1,4AA)   | -3636.88803871 | -18.5 | 0.0  | -3634.20220538 | -18.5 | 0.0  |
| PA-PPh3-ed(1,4)       | -3636.87025735 | -7.3  | 8.3  | -3634.17954629 | -4.3  | 11.3 |
| PA-PPh3-ts(1,4)       | -3636.85755882 | 0.6   | 15.6 | -3634.16055616 | 7.6   | 22.6 |
| PA-PPh3-prod(1,4)     | -3636.88802499 | -18.5 | 0.0  | -3634.21117007 | -24.1 | -5.6 |
| <b>Figures S9-1</b>   |                |       |      |                |       |      |
| Me2NHC-Cu-allenyl     | -2906.34676690 | 0.0   | 0.0  | -2904.31244991 | 0.0   | 0.0  |
| PA-Me2NHC-ed(1,6)     | -2906.36820860 | -13.5 | 4.4  | -2904.32303022 | -6.6  | 11.3 |
| PA-Me2NHC-ts(1,6)     | -2906.35870339 | -7.5  | 10.5 | -2904.31082060 | 1.0   | 19.0 |
| PA-Me2NHC-prod(1,6)   | -2906.38435152 | -23.6 | -1.7 | -2904.35168171 | -24.6 | -2.7 |
| PA-Me2NHC-ed(1,4AA)   | -2906.36948383 | -14.3 | 2.0  | -2904.32509745 | -7.9  | 8.3  |
| PA-Me2NHC-ts(1,4AA)   | -2906.33694241 | 6.2   | 21.8 | -2904.29499524 | 11.0  | 26.6 |
| PA-Me2NHC-prod(1,4AA) | -2906.37273337 | -16.3 | -0.6 | -2904.34286878 | -19.1 | -3.4 |
| PA-Me2NHC-ed(1,4)     | -2906.35273317 | -3.7  | 11.3 | -2904.31486302 | -1.5  | 13.5 |
| PA-Me2NHC-ts(1,4)     | -2906.33858257 | 5.1   | 21.3 | -2904.29415596 | 11.5  | 27.6 |
| PA-Me2NHC-prod(1,4)   | -2906.35699837 | -6.4  | 12.0 | -2904.32628813 | -8.7  | 9.7  |
| PMe3-Cu-allenyl       | -3061.38799261 | 0.0   | 0.0  | -3059.40483824 | 0.0   | 0.0  |
| PA-PMe3-ed(1,6)       | -3061.41761518 | -18.6 | -1.5 | -3059.42339130 | -11.6 | 5.4  |
| PA-PMe3-ts(1,6)       | -3061.40606925 | -11.3 | 6.7  | -3059.40924084 | -2.8  | 15.3 |

|                     |                |       |      |                |       |      |
|---------------------|----------------|-------|------|----------------|-------|------|
| PA-PMe3-prod(1,6)   | -3061.42733065 | -24.7 | -5.0 | -3059.44623527 | -26.0 | -6.3 |
| PA-PMe3-ed(1,4AA)   | -3061.41761516 | -18.6 | -1.5 | -3059.42339134 | -11.6 | 5.4  |
| PA-PMe3-ts(1,4AA)   | -3061.38114455 | 4.3   | 20.4 | -3059.38983225 | 9.4   | 25.5 |
| PA-PMe3-prod(1,4AA) | -3061.41544119 | -17.2 | 0.2  | -3059.43443467 | -18.6 | -1.1 |
| PA-PMe3-ed(1,4)     | -3061.39972670 | -7.4  | 8.7  | -3059.41209322 | -4.6  | 11.5 |
| PA-PMe3-ts(1,4)     | -3061.38452988 | 2.2   | 17.3 | -3059.39166751 | 8.3   | 23.4 |
| PA-PMe3-prod(1,4)   | -3061.42640538 | -24.1 | -3.5 | -3059.44623887 | -26.0 | -5.4 |

## Figure S10-1

dienoate  
dienoate-Naborate

|                                |                |       |       |                |       |       |
|--------------------------------|----------------|-------|-------|----------------|-------|-------|
| SIMes-Cu-allenyl               | -4171.74947715 | 0.0   | 0.0   | -4168.30319348 | 0.0   | 0.0   |
| PA-SIMes(Naborate)-ed(1,6)     | -4171.79416051 | -28.0 | -5.1  | -4168.33168234 | -17.9 | 5.1   |
| PA-SIMes(Naborate)-ts(1,6)     | -4171.78893020 | -24.8 | -2.6  | -4168.32460895 | -13.4 | 8.7   |
| PA-SIMes(Naborate)-prod(1,6)   | -4171.80809714 | -36.8 | -13.2 | -4168.36406260 | -38.2 | -14.6 |
| PA-SIMes(Naborate)-ed(1,4AA)   | -4171.79205581 | -26.7 | -4.9  | -4168.32851328 | -15.9 | 5.9   |
| PA-SIMes(Naborate)-ts(1,4AA)   | -4171.77143042 | -13.8 | 6.8   | -4168.31208485 | -5.6  | 15.0  |
| PA-SIMes(Naborate)-prod(1,4AA) | -4171.80126749 | -32.5 | -10.4 | -4168.35460691 | -32.3 | -10.2 |
| PA-SIMes(Naborate)-ed(1,4)     | -4171.78343724 | -21.3 | 0.3   | -4168.32525125 | -13.8 | 7.7   |
| PA-SIMes(Naborate)-ts(1,4)     | -4171.76705397 | -11.0 | 9.6   | -4168.30606016 | -1.8  | 18.8  |
| PA-SIMes(Naborate)-prod(1,4)   | -4171.79494883 | -28.5 | -5.2  | -4168.35069323 | -29.8 | -6.5  |

dienoate  
dienoate-Naborate

|                               |                |       |       |                |       |       |
|-------------------------------|----------------|-------|-------|----------------|-------|-------|
| PPh3-Cu-allenyl               | -4282.59273720 | 0.0   | 0.0   | -4279.25957911 | 0.0   | 0.0   |
| PA-PPh3(Naborate)-ed(1,6)     | -4282.63578227 | -27.0 | -7.2  | -4279.28502263 | -16.0 | 3.8   |
| PA-PPh3(Naborate)-ts(1,6)     | -4282.63048183 | -23.7 | -4.2  | -4279.27784955 | -11.5 | 8.0   |
| PA-PPh3(Naborate)-prod(1,6)   | -4282.65924778 | -41.7 | -19.3 | -4279.32385937 | -40.3 | -17.9 |
| PA-PPh3(Naborate)-ed(1,4AA)   | -4282.63635133 | -27.4 | -10.1 | -4279.28671163 | -17.0 | 0.2   |
| PA-PPh3(Naborate)-ts(1,4AA)   | -4282.60641457 | -8.6  | 6.5   | -4279.26261681 | -1.9  | 13.2  |
| PA-PPh3(Naborate)-prod(1,4AA) | -4282.64279454 | -31.4 | -14.9 | -4279.31156460 | -32.6 | -16.1 |
| PA-PPh3(Naborate)-ed(1,4)     | -4282.62541498 | -20.5 | -3.8  | -4279.28103205 | -13.5 | 3.3   |
| PA-PPh3(Naborate)-ts(1,4)     | -4282.61213512 | -12.2 | 5.9   | -4279.26285551 | -2.1  | 16.0  |
| PA-PPh3(Naborate)-prod(1,4)   | -4282.65836135 | -41.2 | -17.8 | -4279.32305455 | -39.8 | -16.5 |

| Figure S11-1             |                |       |       |                |       |       |
|--------------------------|----------------|-------|-------|----------------|-------|-------|
| <b>dienoate</b>          |                |       |       |                |       |       |
| PA-9d(Na)-prod(1,6major) | -3684.41094470 | -42.0 | -19.1 | -3681.52395309 | -42.9 | -20.0 |
| PA-9d(Na)-ts(1,6major)   | -3684.38683272 | -26.9 | -7.4  | -3681.48137249 | -16.2 | 3.3   |
| PA-9d(Na)-pc(1,6major)   | -3684.39356949 | -31.1 | -11.3 | -3681.48976031 | -21.5 | -1.7  |
| 9d(Na)-Cu-allenyl        | -3684.34400351 | 0.0   | 0.0   | -3681.45554823 | 0.0   | 0.0   |
| PA-9d(Na)-pc(1,4AA)      | -3684.38863659 | -28.0 | -9.3  | -3681.48735615 | -20.0 | -1.2  |
| PA-9d(Na)-ts(1,4AA)      | -3684.36012968 | -10.1 | 7.3   | -3681.46210495 | -4.1  | 13.4  |
| PA-9d(Na)-prod(1,4AA)    | -3684.40161734 | -36.2 | -17.9 | -3681.51765910 | -39.0 | -20.8 |

| Figure S12-1               |                |       |       |                |       |       |
|----------------------------|----------------|-------|-------|----------------|-------|-------|
| <b>NaOtBu<br/>dienoate</b> |                |       |       |                |       |       |
| PA-SIMes(NaOtBu)-prod(1,4) | -2682.90889554 | -34.2 | -15.2 | -2681.10773701 | -42.4 | -23.4 |
| PA-SIMes(NaOtBu)-ts(1,4)   | -2682.85830968 | -2.5  | 15.5  | -2681.03581136 | 2.7   | 20.7  |
| PA-SIMes(NaOtBu)-ed(1,4)   | -2682.87787625 | -14.8 | 2.9   | -2681.06066246 | -12.9 | 4.8   |
| SIMes-Cu-allenyl           | -2682.80893365 | 28.5  | 10.2  | -2681.00330393 | 23.1  | 4.7   |
| SIMes-Cu(NaOtBu)-allenyl   | -2682.85436097 | 0.0   | 0.0   | -2681.04011606 | 0.0   | 0.0   |
| PA-SIMes(NaOtBu)-ed(1,6)   | -2682.88193280 | -17.3 | 1.2   | -2681.06112264 | -13.2 | 5.3   |
| PA-SIMes(NaOtBu)-ts(1,6)   | -2682.87672376 | -14.0 | 3.6   | -2681.05401346 | -8.7  | 9.0   |
| PA-SIMes(NaOtBu)-prod(1,6) | -2682.89711409 | -26.8 | -8.3  | -2681.09466624 | -34.2 | -15.7 |
| PA-PPh3(NaOtBu)-prod(1,4)  | -2793.76350170 | -40.1 | -17.0 | -2792.06662454 | -41.7 | -18.5 |
| PA-PPh3(NaOtBu)-ts(1,4)    | -2793.72852420 | -18.2 | 0.4   | -2792.01638134 | -10.1 | 8.5   |
| PA-PPh3(NaOtBu)-ed(1,4)    | -2793.73938424 | -25.0 | -5.2  | -2792.02917221 | -18.2 | 1.6   |
| PPh3-Cu-allenyl            | -2793.65219370 | 29.7  | 14.0  | -2791.95968956 | 25.4  | 9.7   |
| PPh3-Cu(NaOtBu)-allenyl    | -2793.69955220 | 0.0   | 0.0   | -2792.00021385 | 0.0   | 0.0   |
| PA-PPh3(NaOtBu)-ed(1,6)    | -2793.72413310 | -15.4 | 2.4   | -2792.01563634 | -9.7  | 8.2   |
| PA-PPh3(NaOtBu)-ts(1,6)    | -2793.71845282 | -11.9 | 7.5   | -2792.00826547 | -5.1  | 14.3  |
| PA-PPh3(NaOtBu)-prod(1,6)  | -2793.74658168 | -29.5 | -8.8  | -2792.05352384 | -33.5 | -12.7 |

| Figure S13-1 |  |  |  |  |  |  |
|--------------|--|--|--|--|--|--|
|--------------|--|--|--|--|--|--|

|                           |                |       |       |                |       |       |
|---------------------------|----------------|-------|-------|----------------|-------|-------|
| <b>NaOMe</b>              |                |       |       |                |       |       |
| <b>dienoate</b>           |                |       |       |                |       |       |
| PA-SIMes(NaOMe)-prod(1,4) | -2682.91287496 | -39.3 | -17.9 | -2681.10638448 | -43.0 | -21.6 |
| PA-SIMes(NaOMe)-ts(1,4)   | -2682.85685677 | -4.2  | 14.3  | -2681.03513143 | 1.7   | 20.2  |
| PA-SIMes(NaOMe)-ed(1,4)   | -2682.87216565 | -13.8 | 4.9   | -2681.05589929 | -11.3 | 7.3   |
| SIMes-Cu-allenyl          | -2682.80893365 | 25.9  | 10.4  | -2681.00330393 | 21.7  | 6.2   |
| SIMes-Cu(NaOMe)-allenyl   | -2682.85017751 | 0.0   | 0.0   | -2681.03782716 | 0.0   | 0.0   |
| PA-SIMes(NaOMe)-ed(1,6)   | -2682.88133505 | -19.6 | -1.3  | -2681.06060139 | -14.3 | 3.9   |
| PA-SIMes(NaOMe)-ts(1,6)   | -2682.87608789 | -16.3 | 3.7   | -2681.05385801 | -10.1 | 9.9   |
| PA-SIMes(NaOMe)-prod(1,6) | -2682.89718148 | -29.5 | -9.5  | -2681.09478096 | -35.7 | -15.7 |
| PA-PPh3(NaOMe)-prod(1,4)  | -2793.76033632 | -40.5 | -17.7 | -2792.06562250 | -41.9 | -19.2 |
| PA-PPh3(NaOMe)-ts(1,4)    | -2793.72287931 | -17.0 | 1.1   | -2792.01287647 | -8.8  | 9.2   |
| PA-PPh3(NaOMe)-ed(1,4)    | -2793.73250696 | -23.0 | -3.6  | -2792.02457383 | -16.2 | 3.3   |
| PPh3-Cu-allenyl           | -2793.65219370 | 27.4  | 13.6  | -2791.95968956 | 24.5  | 10.8  |
| PPh3-Cu(NaOMe)-allenyl    | -2793.69579061 | 0.0   | 0.0   | -2791.99878218 | 0.0   | 0.0   |
| PA-PPh3(NaOMe)-ed(1,6)    | -2793.72105284 | -15.9 | 1.0   | -2792.01406739 | -9.6  | 7.2   |
| PA-PPh3(NaOMe)-ts(1,6)    | -2793.71540045 | -12.3 | 5.7   | -2792.00629710 | -4.7  | 13.2  |
| PA-PPh3(NaOMe)-prod(1,6)  | -2793.74322195 | -29.8 | -9.2  | -2792.05165288 | -33.2 | -12.6 |

Figure S14-1

|                             |                |       |       |                |       |       |
|-----------------------------|----------------|-------|-------|----------------|-------|-------|
| <b>NaOtBu</b>               |                |       |       |                |       |       |
| <b>dienoate</b>             |                |       |       |                |       |       |
| PA-Me2NHC(NaOtBu)-prod(1,4) | -2063.23294191 | -39.2 | -19.3 | -2062.19715108 | -45.3 | -25.3 |
| PA-Me2NHC(NaOtBu)-ts(1,4)   | -2063.19133236 | -13.1 | 3.8   | -2062.13441643 | -5.9  | 10.9  |
| PA-Me2NHC(NaOtBu)-ed(1,4)   | -2063.19489513 | -15.3 | 2.7   | -2062.14478092 | -12.4 | 5.6   |
| Me2NHC-Cu-allenyl           | -2063.14035749 | 18.9  | 2.0   | -2062.09940685 | 16.0  | -0.8  |
| Me2NHC-Cu(NaOtBu)-allenyl   | -2063.17045645 | 0.0   | 0.0   | -2062.12496781 | 0.0   | 0.0   |
| PA-Me2NHC(NaOtBu)-ed(1,6)   | -2063.20787397 | -23.5 | -7.9  | -2062.15367044 | -18.0 | -2.4  |
| PA-Me2NHC(NaOtBu)-ts(1,6)   | -2063.20158543 | -19.5 | -2.4  | -2062.14510942 | -12.6 | 4.5   |
| PA-Me2NHC(NaOtBu)-prod(1,6) | -2063.22634958 | -35.1 | -15.3 | -2062.18783762 | -39.5 | -19.6 |
| PA-PMe3(NaOtBu)-prod(1,4)   | -2218.28483626 | -38.2 | -14.4 | -2217.29311317 | -40.0 | -16.2 |
| PA-PMe3(NaOtBu)-ts(1,4)     | -2218.24392606 | -12.5 | 5.4   | -2217.23790528 | -5.4  | 12.5  |

|                           |                |       |      |                |       |       |
|---------------------------|----------------|-------|------|----------------|-------|-------|
| PA-PMe3(NaOtBu)-cd(1,4)   | -2218.24869111 | -15.5 | 2.3  | -2217.24837195 | -11.9 | 5.8   |
| PMe3-Cu-allenyl           | -2218.18160364 | 26.6  | 12.2 | -2217.19180908 | 23.5  | 9.1   |
| PMe3-Cu(NaOtBu)-allenyl   | -2218.22402238 | 0.0   | 0.0  | -2217.22932901 | 0.0   | 0.0   |
| PA-PMe3(NaOtBu)-cd(1,6)   | -2218.24858381 | -15.4 | 3.6  | -2217.24508172 | -9.9  | 9.1   |
| PA-PMe3(NaOtBu)-ts(1,6)   | -2218.24108932 | -10.7 | 9.3  | -2217.23647756 | -4.5  | 15.5  |
| PA-PMe3(NaOtBu)-prod(1,6) | -2218.26899956 | -28.2 | -6.7 | -2217.28001706 | -31.8 | -10.3 |

## Figure S15-1

NaOPh  
dienoate

|                              |                |       |      |                |       |     |
|------------------------------|----------------|-------|------|----------------|-------|-----|
| 9d(NaOPh)-Cu-allenyl         | -3992.00726325 | 0.0   | 0.0  | -3988.74876006 | 0.0   | 0.0 |
| PA-9d(NaOPh)-ts(1,6major)_01 | -3992.05166190 | -27.9 | -6.6 | -3988.77951579 | -19.3 | 2.0 |
| PA-9d(NaOPh)-ts(1,6major)_02 | -3992.05229106 | -28.3 | -6.7 | -3988.77887716 | -18.9 | 2.7 |
| PA-9d(NaOPh)-ts(1,6major)_03 | -3992.04973850 | -26.7 | -6.0 | -3988.77595352 | -17.1 | 3.6 |
| PA-9d(NaOPh)-ts(1,6minor)_01 | -3992.04916265 | -26.3 | -6.0 | -3988.77649127 | -17.4 | 2.9 |
| PA-9d(NaOPh)-ts(1,6minor)_02 | -3992.05039934 | -27.1 | -5.8 | -3988.77616753 | -17.2 | 4.1 |
| PA-9d(NaOPh)-ts(1,6minor)_03 | -3992.05037272 | -27.1 | -5.3 | -3988.77615462 | -17.2 | 4.5 |
| PA-9d(NaOPh)-ts(1,6minor)_04 | -3992.04531892 | -23.9 | -3.0 | -3988.77131035 | -14.2 | 6.7 |
| PA-9d(NaOPh)-ts(1,6minor)_05 | -3992.04877207 | -26.0 | -3.3 | -3988.77301706 | -15.2 | 7.5 |
| PA-9d(NaOPh)-ts(1,6minor)_06 | -3992.04909257 | -26.2 | -4.0 | -3988.77270768 | -15.0 | 7.2 |
| PA-9d(NaOPh)-ts(1,6minor)_07 | -3992.04770415 | -25.4 | -2.7 | -3988.77190836 | -14.5 | 8.1 |
| PA-9d(NaOPh)-ts(1,6minor)_08 | -3992.04576110 | -24.2 | -2.1 | -3988.77046367 | -13.6 | 8.4 |

## Figure S15-2

## dienoate

|                              |                |       |       |                |       |     |
|------------------------------|----------------|-------|-------|----------------|-------|-----|
| 9b(NaOPh)-Cu-allenyl         | -3991.99949353 | 0.0   | 0.0   | -3988.74305227 | 0.0   | 0.0 |
| PA-9b(NaOPh)-ts(1,6major)_01 | -3992.04887398 | -31.0 | -10.2 | -3988.77567306 | -20.5 | 0.3 |
| PA-9b(NaOPh)-ts(1,6major)_02 | -3992.04843081 | -30.7 | -9.5  | -3988.77479986 | -19.9 | 1.3 |
| PA-9b(NaOPh)-ts(1,6major)_03 | -3992.04507295 | -28.6 | -7.7  | -3988.77025003 | -17.1 | 3.9 |
| PA-9b(NaOPh)-ts(1,6major)_04 | -3992.04363920 | -27.7 | -6.9  | -3988.77034078 | -17.1 | 3.7 |
| PA-9b(NaOPh)-ts(1,6major)_05 | -3992.04280956 | -27.2 | -5.9  | -3988.77000815 | -16.9 | 4.4 |
| PA-9b(NaOPh)-ts(1,6major)_06 | -3992.04643986 | -29.5 | -7.0  | -3988.77076548 | -17.4 | 5.1 |
| PA-9b(NaOPh)-ts(1,6major)_07 | -3992.03578291 | -22.8 | -3.9  | -3988.76208918 | -11.9 | 6.9 |
| PA-9b(NaOPh)-ts(1,6minor)_01 | -3992.04085109 | -26.0 | -5.1  | -3988.76818927 | -15.8 | 5.1 |
| PA-9b(NaOPh)-ts(1,6minor)_02 | -3992.04350985 | -27.6 | -7.0  | -3988.76794301 | -15.6 | 5.0 |

|                              |                |       |      |                |       |      |
|------------------------------|----------------|-------|------|----------------|-------|------|
| PA-9b(NaOPh)-ts(1,6minor)_03 | -3992.04347841 | -27.6 | -6.9 | -3988.76790216 | -15.6 | 5.1  |
| PA-9b(NaOPh)-ts(1,6minor)_04 | -3992.04011574 | -25.5 | -4.3 | -3988.76765743 | -15.4 | 5.8  |
| PA-9b(NaOPh)-ts(1,6minor)_05 | -3992.04422701 | -28.1 | -5.5 | -3988.76843385 | -15.9 | 6.7  |
| PA-9b(NaOPh)-ts(1,6minor)_06 | -3992.03865176 | -24.6 | -4.1 | -3988.76318245 | -12.6 | 7.8  |
| PA-9b(NaOPh)-ts(1,6minor)_07 | -3992.04303960 | -27.3 | -4.9 | -3988.76650603 | -14.7 | 7.7  |
| PA-9b(NaOPh)-ts(1,6minor)_08 | -3992.03806506 | -24.2 | -3.8 | -3988.76245160 | -12.2 | 8.2  |
| PA-9b(NaOPh)-ts(1,6minor)_09 | -3992.03647445 | -23.2 | -0.9 | -3988.76108979 | -11.3 | 11.0 |

## Figure S15-3

## dienoate

|                           |                |       |      |                |       |      |
|---------------------------|----------------|-------|------|----------------|-------|------|
| 9d(Na)-Cu-allenyl         | -3684.34400351 | 0.0   | 0.0  | -3681.45554823 | 0.0   | 0.0  |
| PA-9d(Na)-ts(1,6major)_01 | -3684.38660966 | -26.7 | -6.4 | -3681.48176740 | -16.5 | 3.9  |
| PA-9d(Na)-ts(1,6major)_02 | -3684.38683272 | -26.9 | -7.4 | -3681.48137249 | -16.2 | 3.3  |
| PA-9d(Na)-ts(1,6major)_03 | -3684.38658476 | -26.7 | -6.8 | -3681.48148343 | -16.3 | 3.6  |
| PA-9d(Na)-ts(1,6major)_04 | -3684.38693231 | -26.9 | -6.8 | -3681.48190108 | -16.5 | 3.6  |
| PA-9d(Na)-ts(1,6major)_05 | -3684.38647347 | -26.7 | -6.0 | -3681.48165160 | -16.4 | 4.3  |
| PA-9d(Na)-ts(1,6major)_06 | -3684.38681555 | -26.9 | -6.6 | -3681.48134397 | -16.2 | 4.0  |
| PA-9d(Na)-ts(1,6major)_07 | -3684.38679528 | -26.9 | -6.4 | -3681.48129932 | -16.2 | 4.3  |
| PA-9d(Na)-ts(1,6major)_08 | -3684.38631972 | -26.6 | -5.8 | -3681.48136535 | -16.2 | 4.5  |
| PA-9d(Na)-ts(1,6major)_09 | -3684.38413774 | -25.2 | -4.6 | -3681.47976004 | -15.2 | 5.4  |
| PA-9d(Na)-ts(1,6major)_10 | -3684.38113860 | -23.3 | -3.0 | -3681.47759166 | -13.8 | 6.5  |
| PA-9d(Na)-ts(1,6major)_11 | -3684.38028465 | -22.8 | -3.0 | -3681.47708945 | -13.5 | 6.2  |
| PA-9d(Na)-ts(1,6major)_12 | -3684.38107178 | -23.3 | -2.7 | -3681.47758296 | -13.8 | 6.7  |
| PA-9d(Na)-ts(1,6major)_13 | -3684.37991017 | -22.5 | -2.2 | -3681.47412585 | -11.7 | 8.6  |
| PA-9d(Na)-ts(1,6major)_14 | -3684.36872992 | -15.5 | 5.4  | -3681.46460575 | -5.7  | 15.2 |
| PA-9d(Na)-ts(1,6major)_15 | -3684.36689176 | -14.4 | 4.4  | -3681.46205902 | -4.1  | 14.7 |
| PA-9d(Na)-ts(1,6major)_16 | -3684.36832752 | -15.3 | 5.3  | -3681.46357092 | -5.0  | 15.5 |
| PA-9d(Na)-ts(1,6major)_17 | -3684.36588489 | -13.7 | 7.4  | -3681.46050726 | -3.1  | 18.0 |
| PA-9d(Na)-ts(1,6minor)_01 | -3684.38319287 | -24.6 | -5.8 | -3681.47868489 | -14.5 | 4.3  |
| PA-9d(Na)-ts(1,6minor)_02 | -3684.38087463 | -23.1 | -3.4 | -3681.47704313 | -13.5 | 6.2  |
| PA-9d(Na)-ts(1,6minor)_03 | -3684.38190553 | -23.8 | -3.4 | -3681.47753860 | -13.8 | 6.6  |
| PA-9d(Na)-ts(1,6minor)_04 | -3684.38193893 | -23.8 | -3.1 | -3681.47760104 | -13.8 | 6.9  |
| PA-9d(Na)-ts(1,6minor)_05 | -3684.38193905 | -23.8 | -3.1 | -3681.47760103 | -13.8 | 6.9  |
| PA-9d(Na)-ts(1,6minor)_06 | -3684.38094847 | -23.2 | -2.2 | -3681.47641491 | -13.1 | 7.9  |
| PA-9d(Na)-ts(1,6minor)_07 | -3684.38106148 | -23.3 | -1.8 | -3681.47653146 | -13.2 | 8.3  |
| PA-9d(Na)-ts(1,6minor)_08 | -3684.37819320 | -21.5 | -1.8 | -3681.47218785 | -10.4 | 9.2  |
| PA-9d(Na)-ts(1,6minor)_09 | -3684.37628432 | -20.3 | 0.0  | -3681.47220305 | -10.5 | 9.8  |

## Figure S15-4

|                   |                |     |     |                |     |     |
|-------------------|----------------|-----|-----|----------------|-----|-----|
| 9b(Na)-Cu-allenyl | -3684.34130309 | 0.0 | 0.0 | -3681.45127568 | 0.0 | 0.0 |
|-------------------|----------------|-----|-----|----------------|-----|-----|

|                              |                |       |       |                |       |      |
|------------------------------|----------------|-------|-------|----------------|-------|------|
| PA-9b(Na)-ts(1,6major)_01    | -3684.38105171 | -24.9 | -7.0  | -3681.47660469 | -15.9 | 2.1  |
| PA-9b(Na)-ts(1,6major)_02    | -3684.38118376 | -25.0 | -5.0  | -3681.47691186 | -16.1 | 3.9  |
| PA-9b(Na)-ts(1,6major)_03    | -3684.38149711 | -25.2 | -5.2  | -3681.47696215 | -16.1 | 3.9  |
| PA-9b(Na)-ts(1,6major)_04    | -3684.37475862 | -21.0 | 0.3   | -3681.46889938 | -11.1 | 10.2 |
| PA-9b(Na)-ts(1,6major)_05    | -3684.36763807 | -16.5 | 4.2   | -3681.46293120 | -7.3  | 13.4 |
| PA-9b(Na)-ts(1,6minor)_01    | -3684.37346564 | -20.2 | 0.5   | -3681.46878764 | -11.0 | 9.7  |
| PA-9b(Na)-ts(1,6minor)_02    | -3684.37277477 | -19.7 | 0.7   | -3681.46819088 | -10.6 | 9.9  |
| PA-9b(Na)-ts(1,6minor)_03    | -3684.37402103 | -20.5 | -0.4  | -3681.46816590 | -10.6 | 9.6  |
| PA-9b(Na)-ts(1,6minor)_04    | -3684.37230164 | -19.5 | 2.0   | -3681.46760003 | -10.2 | 11.2 |
| PA-9b(Na)-ts(1,6minor)_05    | -3684.37383755 | -20.4 | 1.2   | -3681.46693180 | -9.8  | 11.8 |
| PA-9b(Na)-ts(1,6minor)_06    | -3684.36850239 | -17.1 | 3.8   | -3681.46320463 | -7.5  | 13.4 |
| PA-9b(Na)-ts(1,6minor)_07    | -3684.37186851 | -19.2 | 2.7   | -3681.46460850 | -8.4  | 13.5 |
| PA-9b(Na)-ts(1,6minor)_08    | -3684.37139520 | -18.9 | 3.4   | -3681.46409148 | -8.0  | 14.2 |
| <b>Figure S15-5</b>          |                |       |       |                |       |      |
| 9d(NaOPh)-Cu-allyl_01        | -4443.46486884 | 0.0   | 0.0   | -4439.67409117 | 0.0   | 0.0  |
| AA-9d(NaOPh)-ts(1,6major)_01 | -4443.52133333 | -35.4 | -11.5 | -4439.71513797 | -25.8 | -1.9 |
| AA-9d(NaOPh)-ts(1,6major)_02 | -4443.51836120 | -33.6 | -9.6  | -4439.71209859 | -23.9 | 0.2  |
| AA-9d(NaOPh)-ts(1,6minor)_01 | -4443.51357738 | -30.6 | -8.2  | -4439.70826334 | -21.4 | 1.0  |
| AA-9d(NaOPh)-ts(1,6minor)_02 | -4443.51568277 | -31.9 | -8.1  | -4439.70959008 | -22.3 | 1.5  |
| AA-9d(NaOPh)-ts(1,6minor)_03 | -4443.51409093 | -30.9 | -7.4  | -4439.70794755 | -21.2 | 2.2  |
| AA-9d(NaOPh)-ts(1,6minor)_04 | -4443.51536893 | -31.7 | -8.4  | -4439.70783247 | -21.2 | 2.1  |
| AA-9d(NaOPh)-ts(1,6minor)_05 | -4443.51130761 | -29.1 | -5.0  | -4439.70526697 | -19.6 | 4.5  |
| AA-9d(NaOPh)-ts(1,6minor)_06 | -4443.51537683 | -31.7 | -8.0  | -4439.70726807 | -20.8 | 2.9  |
| AA-9d(NaOPh)-ts(1,6minor)_07 | -4443.51365954 | -30.6 | -6.2  | -4439.70840896 | -21.5 | 2.9  |
| <b>Figure S15-6</b>          |                |       |       |                |       |      |
| 9b(NaOPh)-Cu-allyl_01        | -4443.46188377 | 0.0   | 0.0   | -4439.67037956 | 0.0   | 0.0  |
| AA-9b(NaOPh)-ts(1,6major)_01 | -4443.51286576 | -32.0 | -9.6  | -4439.70780214 | -23.5 | -1.1 |
| AA-9b(NaOPh)-ts(1,6major)_02 | -4443.50724262 | -28.5 | -5.9  | -4439.70174460 | -19.7 | 2.9  |
| AA-9b(NaOPh)-ts(1,6minor)_01 | -4443.51094440 | -30.8 | -9.3  | -4439.70458757 | -21.5 | 0.0  |
| AA-9b(NaOPh)-ts(1,6minor)_02 | -4443.50957337 | -29.9 | -7.8  | -4439.70343706 | -20.7 | 1.4  |
| AA-9b(NaOPh)-ts(1,6minor)_03 | -4443.51094440 | -30.8 | -8.0  | -4439.70458750 | -21.5 | 1.3  |
| AA-9b(NaOPh)-ts(1,6minor)_04 | -4443.50782875 | -28.8 | -5.1  | -4439.70006372 | -18.6 | 5.1  |

| Figure S15-7               |                |       |      |                |       |      |
|----------------------------|----------------|-------|------|----------------|-------|------|
| <b>dienoate</b>            |                |       |      |                |       |      |
| 9d(Na)-Cu-allyl_01         | -4135.80539302 | 0.0   | 0.0  | -4132.38143186 | 0.0   | 0.0  |
| AA-9d(Na)-ts(1,6major)_01  | -4135.84759100 | -26.5 | -5.5 | -4132.41066897 | -18.3 | 2.6  |
| AA-9d(Na)-ts(1,6major)_02  | -4135.84838469 | -27.0 | -4.3 | -4132.41090700 | -18.5 | 4.2  |
| AA-9d(Na)-ts(1,6major)_03  | -4135.84653724 | -25.8 | -2.6 | -4132.40749701 | -16.4 | 6.9  |
| AA-9d(Na)-ts(1,6minor)_01  | -4135.84493698 | -24.8 | -2.8 | -4132.40740722 | -16.3 | 5.7  |
| AA-9d(Na)-ts(1,6minor)_02  | -4135.84493399 | -24.8 | -2.5 | -4132.40741023 | -16.3 | 6.0  |
| AA-9d(Na)-ts(1,6minor)_03  | -4135.84070943 | -22.2 | -0.6 | -4132.40413683 | -14.2 | 7.3  |
| AA-9d(Na)-ts(1,6minor)_04  | -4135.84304397 | -23.6 | -1.0 | -4132.40612460 | -15.5 | 7.1  |
| AA-9d(Na)-ts(1,6minor)_05  | -4135.84274336 | -23.4 | -1.4 | -4132.40545190 | -15.1 | 7.0  |
| AA-9d(Na)-ts(1,6minor)_06  | -4135.84030088 | -21.9 | 0.4  | -4132.40353329 | -13.9 | 8.4  |
| AA-9d(Na)-ts(1,6minor)_07  | -4135.84266603 | -23.4 | -1.2 | -4132.40395782 | -14.1 | 8.0  |
| Figure S15-8               |                |       |      |                |       |      |
| 9b(Na)-Cu-allyl_01         | -4135.79970911 | 0.0   | 0.0  | -4132.37621802 | 0.0   | 0.0  |
| AA-9b(Na)-ts(1,6major)_01  | -4135.84350716 | -27.5 | -4.8 | -4132.40738079 | -19.6 | 3.1  |
| AA-9b(Na)-ts(1,6major)_02  | -4135.84382415 | -27.7 | -4.2 | -4132.40709904 | -19.4 | 4.1  |
| AA-9b(Na)-ts(1,6major)_03  | -4135.84250319 | -26.9 | -3.9 | -4132.40641442 | -18.9 | 4.0  |
| AA-9b(Na)-ts(1,6major)_04  | -4135.83599319 | -22.8 | 3.0  | -4132.39655676 | -12.8 | 13.0 |
| AA-9b(Na)-ts(1,6minor)_01  | -4135.84124147 | -26.1 | -3.6 | -4132.40442562 | -17.7 | 4.8  |
| AA-9b(Na)-ts(1,6minor)_02  | -4135.83865109 | -24.4 | -2.3 | -4132.40081326 | -15.4 | 6.7  |
| AA-9b(Na)-ts(1,6minor)_03  | -4135.84011322 | -25.4 | -2.5 | -4132.40144646 | -15.8 | 7.0  |
| AA-9b(Na)-ts(1,6minor)_04  | -4135.84026091 | -25.4 | -2.2 | -4132.40124112 | -15.7 | 7.5  |
| AA-9b(Na)-ts(1,6minor)_05  | -4135.83794846 | -24.0 | 0.2  | -4132.39898592 | -14.3 | 10.0 |
| Figure S15-9               |                |       |      |                |       |      |
| <b>NaOPh</b>               |                |       |      |                |       |      |
| <b>(PhO)2BpinNa</b>        |                |       |      |                |       |      |
| <b>PhOBpin</b>             |                |       |      |                |       |      |
| <b>dienoate</b>            |                |       |      |                |       |      |
| 9d(Naborate)-Cu-allenyl_01 | -4402.92814227 | 0.0   | 0.0  | -4399.19480498 | 0.0   | 0.0  |
| 9d(Naborate)-Cu-allenyl_02 | -4402.92826395 | -0.1  | 0.8  | -4399.19590677 | -0.7  | 0.2  |
| 9d(Naborate)-Cu-allenyl_03 | -4402.92868128 | -0.3  | 1.4  | -4399.19475274 | 0.0   | 1.8  |
| 9d(Naborate)-Cu-allenyl_04 | -4402.93723838 | -5.7  | -0.2 | -4399.20053326 | -3.6  | 2.0  |
| 9d(Naborate)-Cu-allenyl_05 | -4402.92759120 | 0.3   | 3.6  | -4399.19381205 | 0.6   | 3.9  |



|                                        |                |       |      |                |       |      |
|----------------------------------------|----------------|-------|------|----------------|-------|------|
| <b>9d(Naborate)-Cu-allenyl_06</b>      | -4402.93056150 | -1.5  | 2.2  | -4399.19304152 | 1.1   | 4.8  |
| <b>9d(Naborate)-Cu-allenyl_07</b>      | -4402.92762960 | 0.3   | 3.7  | -4399.19382481 | 0.6   | 4.0  |
| <b>PA-9b(Naborate)-ts(1,6major)_01</b> | -4402.96911088 | -25.7 | -2.5 | -4399.22269316 | -17.5 | 5.7  |
| <b>PA-9b(Naborate)-ts(1,6major)_02</b> | -4402.96668490 | -24.2 | -2.0 | -4399.22046745 | -16.1 | 6.1  |
| <b>PA-9b(Naborate)-ts(1,6major)_03</b> | -4402.96791622 | -25.0 | -1.0 | -4399.22214847 | -17.2 | 6.8  |
| <b>PA-9b(Naborate)-ts(1,6major)_04</b> | -4402.96551321 | -23.5 | -0.8 | -4399.21952702 | -15.5 | 7.1  |
| <b>PA-9b(Naborate)-ts(1,6major)_05</b> | -4402.96158402 | -21.0 | 1.1  | -4399.21613588 | -13.4 | 8.7  |
| <b>PA-9b(Naborate)-ts(1,6major)_06</b> | -4402.96696816 | -24.4 | -0.4 | -4399.21790935 | -14.5 | 9.5  |
| <b>PA-9b(Naborate)-ts(1,6major)_07</b> | -4402.96399012 | -22.5 | 1.3  | -4399.21553883 | -13.0 | 10.8 |
| <b>PA-9b(Naborate)-ts(1,6major)_08</b> | -4402.96359886 | -22.2 | 2.9  | -4399.21762865 | -14.3 | 10.8 |
| <b>PA-9b(Naborate)-ts(1,6major)_09</b> | -4402.96762109 | -24.8 | 0.0  | -4399.21776256 | -14.4 | 10.3 |
| <b>PA-9b(Naborate)-ts(1,6major)_10</b> | -4402.96761066 | -24.8 | 0.2  | -4399.21773837 | -14.4 | 10.6 |
| <b>9d-Cu-allenyl</b>                   | -3522.59908511 | 0.0   | 0.0  | -3519.82155195 | 0.0   | 0.0  |
| <b>PA-9b-ts(1,6major)_01</b>           | -3522.62386542 | -15.5 | 5.1  | -3519.83070138 | -5.7  | 14.9 |
| <b>PA-9b-ts(1,6major)_02</b>           | -3522.62439727 | -15.9 | 3.8  | -3519.83030742 | -5.5  | 14.2 |
| <b>PA-9b-ts(1,6major)_03</b>           | -3522.62375539 | -15.5 | 5.1  | -3519.83018196 | -5.4  | 15.2 |
| <b>PA-9b-ts(1,6major)_04</b>           | -3522.62291835 | -15.0 | 5.9  | -3519.83006684 | -5.3  | 15.5 |
| <b>PA-9b-ts(1,6major)_05</b>           | -3522.62263767 | -14.8 | 7.2  | -3519.82987664 | -5.2  | 16.7 |

E(sp,sum) ..... single point electronic energy in Hartree with Def2TZVPP basis set in thf(SMD) after mass balance

$\Delta E(\text{sp})$  ..... relative single point electronic energy in kcal/mol with Def2TZVPP basis set in thf(SMD)

$\Delta G(\text{sp})$  ..... relative single point free energy in kcal/mol with Def2TZVPP basis set in thf(SMD)

$$[\Delta G(\text{sp}) = \Delta E(\text{sp})/\text{Def2TZVPP} + \Delta G_{\text{corr}}/\text{Def2SVP}]$$

## 6. Geometries of computed structures with $\omega$ B97XD/Def2SVP<sub>thf</sub>(PCM)

32

Figure\_S1-1\_dienoate / electronic energy: -841.927078481 a.u. / lowest freq: 24.55 cm<sup>-1</sup>

|   |           |           |           |
|---|-----------|-----------|-----------|
| C | -0.660544 | -0.726572 | 0.059153  |
| C | -1.860539 | -0.097447 | 0.115996  |
| H | -0.691600 | -1.818492 | -0.004770 |
| C | -1.976243 | 1.390665  | 0.160143  |
| C | -3.120576 | -0.891785 | 0.187355  |
| O | -3.041424 | 1.823605  | -0.507466 |
| O | -1.182749 | 2.134043  | 0.689285  |
| O | -4.147702 | -0.497504 | 0.683440  |
| O | -2.981802 | -2.118850 | -0.320932 |
| C | -4.097604 | -2.989729 | -0.195724 |
| H | -4.332384 | -3.170881 | 0.862818  |
| H | -3.810049 | -3.927003 | -0.683244 |
| H | -4.981752 | -2.562067 | -0.688186 |
| C | -3.254671 | 3.228152  | -0.535442 |
| H | -3.354009 | 3.627502  | 0.483524  |
| H | -4.184056 | 3.384216  | -1.092621 |
| H | -2.420438 | 3.737793  | -1.038016 |
| C | 0.656646  | -0.129211 | 0.062308  |
| H | 0.725624  | 0.955889  | 0.150505  |
| C | 1.759981  | -0.902956 | -0.019704 |
| H | 1.621029  | -1.988149 | -0.089650 |
| C | 3.156351  | -0.453635 | -0.025165 |
| C | 4.175093  | -1.416830 | -0.109525 |
| C | 3.522207  | 0.902114  | 0.053056  |
| C | 5.517020  | -1.042840 | -0.114390 |
| H | 3.907556  | -2.474776 | -0.172060 |
| C | 4.861836  | 1.275255  | 0.048166  |
| H | 2.754752  | 1.675486  | 0.118691  |
| C | 5.863995  | 0.305241  | -0.035401 |
| H | 6.294080  | -1.807149 | -0.179427 |
| H | 5.127957  | 2.332459  | 0.111300  |
| H | 6.914980  | 0.602284  | -0.038425 |

13

Figure\_S1-1\_PhOH / electronic energy: -307.150518153 a.u. / lowest freq: 229.45 cm<sup>-1</sup>

|   |           |           |           |
|---|-----------|-----------|-----------|
| C | 1.125381  | -1.219560 | 0.000000  |
| C | -0.269323 | -1.196698 | 0.000012  |
| C | -0.947244 | 0.027670  | 0.000021  |
| C | -0.218172 | 1.223214  | 0.000014  |
| C | 1.173552  | 1.186894  | -0.000002 |
| C | 1.855907  | -0.031913 | -0.000013 |
| H | 1.642554  | -2.181822 | -0.000008 |
| H | -0.835464 | -2.132547 | 0.000025  |
| H | -0.759892 | 2.171100  | 0.000022  |
| H | 1.731740  | 2.126121  | -0.000009 |
| H | 2.947293  | -0.054666 | -0.000025 |
| O | -2.295715 | 0.113012  | -0.000021 |
| H | -2.681132 | -0.769923 | -0.000028 |

13

Figure\_S1-1\_NaOph / electronic energy: -468.853649444 a.u. / lowest freq: 15.68 cm<sup>-1</sup>

|    |           |           |           |
|----|-----------|-----------|-----------|
| C  | -1.912599 | -1.200838 | -0.011375 |
| C  | -0.521476 | -1.206572 | 0.015351  |
| C  | 0.241248  | 0.001459  | 0.028090  |
| C  | -0.524240 | 1.207747  | 0.015228  |
| C  | -1.915348 | 1.198823  | -0.011498 |
| C  | -2.633248 | -0.001829 | -0.025828 |
| H  | -2.448993 | -2.155315 | -0.021458 |
| H  | 0.025710  | -2.154567 | 0.026010  |
| H  | 0.020847  | 2.156944  | 0.025804  |
| H  | -2.453903 | 2.152085  | -0.021671 |
| H  | -3.725390 | -0.003095 | -0.047610 |
| O  | 1.527681  | 0.002959  | 0.048939  |
| Na | 3.632205  | -0.001133 | -0.037490 |

15

Figure\_S1-1\_tBuOH / electronic energy: -233.441013186 a.u. / lowest freq: 210.58 cm<sup>-1</sup>

|   |           |           |           |
|---|-----------|-----------|-----------|
| O | 0.065052  | -0.000004 | -1.443660 |
| C | -0.006173 | 0.000001  | -0.021758 |
| C | 0.669714  | 1.259454  | 0.527496  |
| H | 0.587173  | 1.313300  | 1.623543  |
| H | 1.741269  | 1.269991  | 0.269361  |
| H | 0.203702  | 2.158344  | 0.097210  |
| C | 0.669615  | -1.259504 | 0.527499  |
| H | 0.587068  | -1.313344 | 1.623545  |
| H | 0.203536  | -2.158359 | 0.097212  |
| H | 1.741170  | -1.270125 | 0.269365  |
| C | -1.494539 | 0.000058  | 0.313449  |
| H | -1.980331 | -0.891394 | -0.110366 |
| H | -1.650877 | 0.000067  | 1.401900  |
| H | -1.980266 | 0.891542  | -0.110372 |
| H | 0.995436  | -0.000040 | -1.692235 |

15

Figure\_S1-1\_NaOtBu / electronic energy: -395.117378571 a.u. / lowest freq: 32.67 cm<sup>-1</sup>

|    |           |           |           |
|----|-----------|-----------|-----------|
| O  | -0.737133 | -0.009141 | 0.003654  |
| C  | 0.624960  | -0.000675 | -0.000009 |
| C  | 1.181519  | -1.414753 | -0.289909 |
| H  | 2.284457  | -1.455957 | -0.304558 |
| H  | 0.819613  | -2.118024 | 0.477986  |
| H  | 0.809650  | -1.764308 | -1.267141 |
| C  | 1.175601  | 0.461725  | 1.370139  |
| H  | 2.278378  | 0.484748  | 1.411897  |
| H  | 0.800290  | 1.473434  | 1.596181  |
| H  | 0.814389  | -0.215472 | 2.161532  |
| C  | 1.165629  | 0.961801  | -1.084173 |
| H  | 0.789122  | 1.980374  | -0.894033 |
| H  | 2.268079  | 1.001909  | -1.121930 |
| H  | 0.797342  | 0.647083  | -2.074606 |
| Na | -2.786410 | -0.000841 | 0.000833  |

33

Figure\_S1-1\_Ph0Bpin / electronic energy: -717.466658936 a.u. / lowest freq: 34.04 cm-1

|   |           |           |           |
|---|-----------|-----------|-----------|
| B | 0.316485  | -0.649497 | 0.152442  |
| O | 0.547339  | 0.656564  | -0.167517 |
| O | 1.450352  | -1.390749 | 0.310010  |
| C | 1.953393  | 0.765407  | -0.475562 |
| C | 2.556556  | -0.464329 | 0.303349  |
| C | 3.750402  | -1.118973 | -0.372082 |
| H | 4.110941  | -1.956020 | 0.242581  |
| H | 3.490766  | -1.511055 | -1.363342 |
| H | 4.572751  | -0.396645 | -0.481985 |
| C | 2.881450  | -0.142716 | 1.761241  |
| H | 3.761317  | 0.510734  | 1.842022  |
| H | 2.033939  | 0.348756  | 2.261363  |
| H | 3.094875  | -1.080566 | 2.293131  |
| C | 2.090739  | 0.636050  | -1.991454 |
| H | 3.132712  | 0.771530  | -2.312966 |
| H | 1.476060  | 1.410062  | -2.472261 |
| H | 1.740869  | -0.345498 | -2.343688 |
| C | 2.458430  | 2.121802  | -0.012348 |
| H | 1.979441  | 2.916387  | -0.602078 |
| H | 2.232209  | 2.298870  | 1.046507  |
| H | 3.546064  | 2.197566  | -0.158022 |
| H | -2.930733 | -2.174758 | -0.976580 |
| O | -0.912560 | -1.220338 | 0.303715  |
| C | -3.126356 | -1.200585 | -0.524893 |
| C | -2.103803 | -0.564658 | 0.181286  |
| C | -4.371635 | -0.585968 | -0.642680 |
| C | -2.327104 | 0.678308  | 0.778803  |
| C | -4.601602 | 0.659823  | -0.057725 |
| H | -1.522715 | 1.166044  | 1.330768  |
| C | -3.575625 | 1.285149  | 0.651396  |
| H | -5.577031 | 1.140857  | -0.152884 |
| H | -3.745791 | 2.258600  | 1.116820  |
| H | -5.168218 | -1.087052 | -1.197239 |

46

Figure\_S1-1\_(Ph0)2BpinNa / electronic energy: -1186.36814498 a.u. / lowest freq: 13.97 cm-1

|    |           |           |           |
|----|-----------|-----------|-----------|
| B  | -0.563220 | 0.044928  | -0.178943 |
| O  | 0.291267  | 0.926614  | 0.688425  |
| C  | 1.283536  | 1.704672  | 0.236971  |
| C  | 1.570313  | 1.877919  | -1.127640 |
| C  | 2.065408  | 2.387362  | 1.183443  |
| C  | 2.618259  | 2.709596  | -1.518355 |
| H  | 0.968476  | 1.357829  | -1.872206 |
| C  | 3.108859  | 3.216376  | 0.779645  |
| H  | 1.838595  | 2.254777  | 2.244585  |
| C  | 3.395857  | 3.384044  | -0.576007 |
| H  | 2.826632  | 2.832602  | -2.584305 |
| H  | 3.704622  | 3.736239  | 1.534259  |
| H  | 4.214297  | 4.033139  | -0.893992 |
| Na | -0.808966 | 0.523795  | 2.687870  |
| O  | -1.401273 | 0.751365  | -1.110868 |
| O  | -1.477954 | -0.585186 | 0.786000  |
| C  | -2.750349 | 0.668453  | -0.700149 |
| C  | -2.762683 | -0.634075 | 0.179234  |
| C  | -3.835371 | -0.661639 | 1.260867  |
| C  | -2.856470 | -1.909073 | -0.666303 |
| C  | -3.649998 | 0.599972  | -1.930115 |
| C  | -3.098822 | 1.925515  | 0.107771  |
| H  | -3.332450 | -0.201151 | -2.609851 |
| H  | -3.597144 | 1.551134  | -2.480503 |
| H  | -4.700038 | 0.428292  | -1.646429 |
| H  | -2.493507 | 1.994151  | 1.022809  |
| H  | -4.162427 | 1.964752  | 0.386050  |
| H  | -2.867924 | 2.809936  | -0.503853 |
| H  | -3.713572 | 0.159050  | 1.981888  |
| H  | -3.788318 | -1.612147 | 1.813558  |
| H  | -4.838966 | -0.577840 | 0.817054  |
| H  | -2.121263 | -1.893048 | -1.482449 |
| H  | -3.861061 | -2.045468 | -1.092990 |
| H  | -2.632217 | -2.773934 | -0.024406 |
| H  | 1.663800  | -2.361720 | -2.479463 |
| C  | 1.156468  | -1.758231 | -0.480048 |
| C  | 1.868619  | -2.528543 | -1.419688 |

|   |          |           |           |
|---|----------|-----------|-----------|
| C | 1.421837 | -1.970396 | 0.885132  |
| C | 2.803385 | -3.473353 | -1.010584 |
| C | 2.361381 | -2.920725 | 1.284246  |
| H | 3.340044 | -4.056682 | -1.763421 |
| C | 3.059848 | -3.680848 | 0.347231  |
| H | 2.547156 | -3.067370 | 2.351610  |
| H | 3.793490 | -4.423052 | 0.668193  |
| O | 0.272585 | -0.884037 | -0.951749 |
| H | 0.889028 | -1.388098 | 1.633642  |

51

Figure\_S1-1\_9d-Cu-allenyl / electronic energy: -2677.36469942 a.u. / lowest freq: 18.91 cm<sup>-1</sup>

|    |           |           |           |
|----|-----------|-----------|-----------|
| C  | -0.949725 | -2.111091 | -0.745708 |
| H  | -1.456710 | -2.283710 | -1.705397 |
| C  | 0.561005  | -2.346837 | -0.831595 |
| H  | 0.890390  | -3.232260 | -0.270668 |
| C  | 0.165570  | -0.172304 | -0.062012 |
| C  | 2.489588  | -0.947618 | -0.009125 |
| C  | 3.411595  | -1.770382 | -0.661262 |
| C  | 2.949352  | 0.031053  | 0.882181  |
| C  | 4.786704  | -1.603717 | -0.456366 |
| C  | 4.314605  | 0.217353  | 1.092648  |
| C  | 5.223765  | -0.605927 | 0.415840  |
| H  | 6.296282  | -0.467228 | 0.579491  |
| Cu | 0.319303  | 1.720856  | 0.321210  |
| N  | -1.018985 | -0.701736 | -0.358187 |
| N  | 1.108117  | -1.120853 | -0.238640 |
| H  | -1.611031 | 2.294197  | -1.821534 |
| H  | 0.899252  | -2.452084 | -1.873899 |
| H  | -1.438768 | -2.738242 | 0.015197  |
| C  | -2.263181 | 0.059952  | -0.389790 |
| H  | -2.079760 | 0.941851  | 0.244418  |
| C  | -3.394832 | -0.734034 | 0.234210  |
| C  | -4.274734 | -1.509681 | -0.527751 |
| C  | -3.538962 | -0.723986 | 1.626854  |
| C  | -5.279826 | -2.255582 | 0.089569  |
| H  | -4.183468 | -1.543227 | -1.615414 |
| C  | -4.540821 | -1.467687 | 2.245898  |
| H  | -2.855877 | -0.121511 | 2.231908  |
| C  | -5.415255 | -2.236764 | 1.476429  |
| H  | -5.958977 | -2.855647 | -0.519831 |
| H  | -4.643075 | -1.444096 | 3.332974  |
| H  | -6.203316 | -2.819047 | 1.958824  |
| C  | -2.550525 | 0.591965  | -1.802286 |
| H  | -3.536244 | 1.092393  | -1.782965 |
| H  | -2.627040 | -0.245072 | -2.514744 |
| O  | -1.535632 | 1.430876  | -2.265600 |
| C  | 4.800481  | 1.257189  | 2.068770  |
| H  | 4.053326  | 2.049530  | 2.216065  |
| H  | 5.002982  | 0.802287  | 3.051711  |
| H  | 5.735078  | 1.721832  | 1.723578  |
| C  | 5.770329  | -2.464765 | -1.205878 |
| H  | 6.734464  | -2.524069 | -0.682115 |
| H  | 5.386771  | -3.485941 | -1.343318 |
| H  | 5.962508  | -2.048637 | -2.207961 |
| H  | 3.073111  | -2.542835 | -1.353500 |
| H  | 2.231718  | 0.647662  | 1.427342  |
| C  | 0.056509  | 3.624341  | 0.493740  |
| H  | 0.571009  | 4.357231  | 1.130573  |
| C  | -0.918418 | 4.038216  | -0.261867 |
| C  | -1.925600 | 4.342938  | -1.074928 |
| H  | -2.962524 | 4.334227  | -0.721718 |
| H  | -1.744517 | 4.692912  | -2.096941 |

83

Figure\_S1-1\_PA-9d(Na)-ts(1,6major) / electronic energy: -3681.01674239 a.u. / lowest freq: -425.84 cm<sup>-1</sup>

|    |           |           |           |
|----|-----------|-----------|-----------|
| C  | 2.866803  | 2.675946  | 1.037241  |
| H  | 3.618483  | 3.073400  | 0.344267  |
| C  | 1.496643  | 3.345149  | 0.935558  |
| H  | 1.285729  | 4.038149  | 1.760640  |
| C  | 1.246966  | 1.039170  | 0.692392  |
| C  | -0.796962 | 2.290790  | 1.180897  |
| C  | -1.490484 | 3.438376  | 0.798338  |
| C  | -1.479557 | 1.247321  | 1.820637  |
| C  | -2.874586 | 3.531001  | 0.998245  |
| C  | -2.851518 | 1.327151  | 2.045160  |
| C  | -3.540848 | 2.470137  | 1.614215  |
| H  | -4.618525 | 2.543255  | 1.788127  |
| Cu | 0.443095  | -0.673683 | 0.087133  |
| N  | 2.545629  | 1.293601  | 0.660974  |
| N  | 0.593216  | 2.188102  | 0.972750  |
| C  | -0.520351 | -1.415746 | -1.646627 |
| C  | 0.525645  | -0.530428 | -2.098307 |
| Na | 3.541048  | 1.559954  | -2.683597 |
| H  | 1.377226  | 3.887276  | -0.017588 |
| H  | 3.266719  | 2.708454  | 2.064537  |
| H  | -0.293059 | -2.477742 | -1.765329 |
| C  | 0.359803  | 0.903986  | -2.362672 |
| C  | 1.798868  | -1.136899 | -2.511518 |
| O  | -0.906702 | 1.322018  | -2.270671 |
| O  | 1.249489  | 1.695745  | -2.636288 |

|   |           |           |           |
|---|-----------|-----------|-----------|
| O | 2.729106  | -0.577606 | -3.070754 |
| O | 1.883062  | -2.439152 | -2.201216 |
| C | 3.067140  | -3.118499 | -2.585350 |
| H | 3.157940  | -3.161586 | -3.680079 |
| H | 2.981622  | -4.130150 | -2.174801 |
| H | 3.957585  | -2.618517 | -2.178973 |
| C | -1.154302 | 2.696016  | -2.515703 |
| H | -0.506982 | 3.328730  | -1.895213 |
| H | -2.204989 | 2.866151  | -2.256610 |
| H | -0.981270 | 2.936927  | -3.574367 |
| C | 3.541140  | 0.255101  | 0.406446  |
| H | 3.238270  | -0.254293 | -0.521579 |
| C | 3.569791  | -0.776710 | 1.510104  |
| C | 3.338648  | -0.440898 | 2.848798  |
| C | 3.833792  | -2.114224 | 1.194831  |
| C | 3.358980  | -1.418274 | 3.843111  |
| H | 3.114557  | 0.593821  | 3.117691  |
| C | 3.857616  | -3.094769 | 2.184782  |
| H | 4.001163  | -2.392857 | 0.151635  |
| C | 3.616254  | -2.750116 | 3.514915  |
| H | 3.167032  | -1.139253 | 4.881685  |
| H | 4.052018  | -4.135263 | 1.915236  |
| H | 3.623372  | -3.516908 | 4.292376  |
| C | 4.920609  | 0.898773  | 0.075156  |
| H | 5.615125  | 0.019787  | -0.011122 |
| H | 5.252989  | 1.400160  | 1.029742  |
| O | 4.871332  | 1.700685  | -0.997615 |
| C | -1.825621 | -1.113976 | -1.224459 |
| H | -2.112915 | -0.072661 | -1.093273 |
| C | -2.736375 | -2.126181 | -0.917369 |
| H | -2.504266 | -3.121690 | -1.302082 |
| C | -4.180716 | -1.862138 | -0.728250 |
| C | -5.091188 | -2.927133 | -0.811338 |
| C | -4.686171 | -0.577836 | -0.471120 |
| C | -6.457825 | -2.720791 | -0.638977 |
| H | -4.716894 | -3.934837 | -1.011349 |
| C | -6.052175 | -0.370517 | -0.297835 |
| H | -4.007551 | 0.273745  | -0.389597 |
| C | -6.945620 | -1.439678 | -0.379347 |
| H | -7.147072 | -3.565407 | -0.707643 |
| H | -6.421400 | 0.637572  | -0.095148 |
| H | -8.016271 | -1.274778 | -0.241455 |
| C | -3.571403 | 0.223601  | 2.775210  |
| H | -2.873392 | -0.563606 | 3.091738  |
| H | -4.079472 | 0.612349  | 3.670806  |
| H | -4.340469 | -0.236372 | 2.136249  |
| C | -3.621699 | 4.751481  | 0.526618  |
| H | -4.614503 | 4.821204  | 0.991853  |
| H | -3.067914 | 5.673798  | 0.755415  |
| H | -3.766496 | 4.721037  | -0.565435 |
| H | -0.962707 | 4.269764  | 0.326130  |
| H | -0.924754 | 0.375016  | 2.167759  |
| C | 0.058354  | -2.071084 | 1.498789  |
| H | 0.887162  | -2.110107 | 2.209329  |
| C | -1.081011 | -2.617436 | 1.438593  |
| C | -2.349736 | -2.995465 | 1.131882  |
| H | -2.536143 | -4.018874 | 0.794614  |
| H | -3.176879 | -2.515024 | 1.662542  |

51

Figure\_S1-1\_9d-Cu-allenyl / electronic energy: -2677.36469942 a.u. / lowest freq: 18.91 cm-1

|    |           |           |           |
|----|-----------|-----------|-----------|
| C  | -0.949725 | -2.111091 | -0.745708 |
| H  | -1.456710 | -2.283710 | -1.705397 |
| C  | 0.561005  | -2.346837 | -0.831595 |
| H  | 0.890390  | -3.232260 | -0.270668 |
| C  | 0.165570  | -0.172304 | -0.062012 |
| C  | 2.489588  | -0.947618 | -0.009125 |
| C  | 3.411595  | -1.770382 | -0.661262 |
| C  | 2.949352  | 0.031053  | 0.882181  |
| C  | 4.786704  | -1.603717 | -0.456366 |
| C  | 4.314605  | 0.217353  | 1.092648  |
| C  | 5.223765  | -0.605927 | 0.415840  |
| H  | 6.296282  | -0.467228 | 0.579491  |
| Cu | 0.319303  | 1.720856  | 0.321210  |
| N  | -1.018985 | -0.701736 | -0.358187 |
| N  | 1.108117  | -1.120853 | -0.238640 |
| H  | -1.611031 | 2.294197  | -1.821534 |
| H  | 0.899252  | -2.452084 | -1.873899 |
| H  | -1.438768 | -2.738242 | 0.015197  |
| C  | -2.263181 | 0.059952  | -0.389790 |
| H  | -2.079760 | 0.941851  | 0.244418  |
| C  | -3.394832 | -0.734034 | 0.234210  |
| C  | -4.274734 | -1.509681 | -0.527751 |
| C  | -3.538962 | -0.723986 | 1.626854  |
| C  | -5.279826 | -2.255582 | 0.089569  |
| H  | -4.183468 | -1.543227 | -1.615414 |
| C  | -4.540821 | -1.467687 | 2.245898  |
| H  | -2.855877 | -0.121511 | 2.231908  |
| C  | -5.415255 | -2.236764 | 1.476429  |
| H  | -5.958977 | -2.855647 | -0.519831 |

|   |           |           |           |
|---|-----------|-----------|-----------|
| H | -4.643075 | -1.444096 | 3.332974  |
| H | -6.203316 | -2.819047 | 1.958824  |
| C | -2.550525 | 0.591965  | -1.802286 |
| H | -3.536244 | 1.092393  | -1.782965 |
| H | -2.627040 | -0.245072 | -2.514744 |
| O | -1.535632 | 1.430876  | -2.265600 |
| C | 4.800481  | 1.257189  | 2.068770  |
| H | 4.053326  | 2.049530  | 2.216065  |
| H | 5.002982  | 0.802287  | 3.051711  |
| H | 5.735078  | 1.721832  | 1.723578  |
| C | 5.770329  | -2.464765 | -1.205878 |
| H | 6.734464  | -2.524069 | -0.682115 |
| H | 5.386771  | -3.485941 | -1.343318 |
| H | 5.962508  | -2.048637 | -2.207961 |
| H | 3.073111  | -2.542835 | -1.353500 |
| H | 2.231718  | 0.647662  | 1.427342  |
| C | 0.056509  | 3.624341  | 0.493740  |
| H | 0.571009  | 4.357231  | 1.130573  |
| C | -0.918418 | 4.038216  | -0.261867 |
| C | -1.925600 | 4.342938  | -1.074928 |
| H | -2.962524 | 4.334227  | -0.721718 |
| H | -1.744517 | 4.692912  | -2.096941 |

83

Figure\_S1-1\_PA-9d(Na)-ts(1,6major) / electronic energy: -3681.01674239 a.u. / lowest freq: -425.84 cm<sup>-1</sup>

|    |           |           |           |
|----|-----------|-----------|-----------|
| C  | 2.866803  | 2.675946  | 1.037241  |
| H  | 3.618483  | 3.073400  | 0.344267  |
| C  | 1.496643  | 3.345149  | 0.935558  |
| H  | 1.285729  | 4.038149  | 1.760640  |
| C  | 1.246966  | 1.039170  | 0.692392  |
| C  | -0.796962 | 2.290790  | 1.180897  |
| C  | -1.490484 | 3.438376  | 0.798338  |
| C  | -1.479557 | 1.247321  | 1.820637  |
| C  | -2.874586 | 3.531001  | 0.998245  |
| C  | -2.851518 | 1.327151  | 2.045160  |
| C  | -3.540848 | 2.470137  | 1.614215  |
| H  | -4.618525 | 2.543255  | 1.788127  |
| Cu | 0.443095  | -0.673683 | 0.087133  |
| N  | 2.545629  | 1.293601  | 0.660974  |
| N  | 0.593216  | 2.188102  | 0.972750  |
| C  | -0.520351 | -1.415746 | -1.646627 |
| C  | 0.525645  | -0.530428 | -2.098307 |
| Na | 3.541048  | 1.559954  | -2.683597 |
| H  | 1.377226  | 3.887276  | -0.017588 |
| H  | 3.266719  | 2.708454  | 2.064537  |
| H  | -0.293059 | -2.477742 | -1.765329 |
| C  | 0.359803  | 0.903986  | -2.362672 |
| C  | 1.798868  | -1.136899 | -2.511518 |
| O  | -0.906702 | 1.322018  | -2.270671 |
| O  | 1.249489  | 1.695745  | -2.636288 |
| O  | 2.729106  | -0.577606 | -3.070754 |
| O  | 1.883062  | -2.439152 | -2.201216 |
| C  | 3.067140  | -3.118499 | -2.585350 |
| H  | 3.157940  | -3.161586 | -3.680079 |
| H  | 2.981622  | -4.130150 | -2.174801 |
| H  | 3.957585  | -2.618517 | -2.178973 |
| C  | -1.154302 | 2.696016  | -2.515703 |
| H  | -0.506982 | 3.328730  | -1.895213 |
| H  | -2.204989 | 2.866151  | -2.256610 |
| H  | -0.981270 | 2.936927  | -3.574367 |
| C  | 3.541140  | 0.255101  | 0.406446  |
| H  | 3.238270  | -0.254293 | -0.521579 |
| C  | 3.569791  | -0.776710 | 1.510104  |
| C  | 3.338648  | -0.440898 | 2.848798  |
| C  | 3.833792  | -2.114224 | 1.194831  |
| C  | 3.358980  | -1.418274 | 3.843111  |
| H  | 3.114557  | 0.593821  | 3.117691  |
| C  | 3.857616  | -3.094769 | 2.184782  |
| H  | 4.001163  | -2.392857 | 0.151635  |
| C  | 3.616254  | -2.750116 | 3.514915  |
| H  | 3.167032  | -1.139253 | 4.881685  |
| H  | 4.052018  | -4.135263 | 1.915236  |
| H  | 3.623372  | -3.516908 | 4.292376  |
| C  | 4.920609  | 0.898773  | 0.075156  |
| H  | 5.615125  | 0.019787  | -0.011122 |
| H  | 5.252989  | 1.400160  | 1.029742  |
| O  | 4.871332  | 1.700685  | -0.997615 |
| C  | -1.825621 | -1.113976 | -1.224459 |
| H  | -2.112915 | -0.072661 | -1.093273 |
| C  | -2.736375 | -2.126181 | -0.917369 |
| H  | -2.504266 | -3.121690 | -1.302082 |
| C  | -4.180716 | -1.862138 | -0.728250 |
| C  | -5.091188 | -2.927133 | -0.811338 |
| C  | -4.686171 | -0.577836 | -0.471120 |
| C  | -6.457825 | -2.720791 | -0.638977 |
| H  | -4.716894 | -3.934837 | -1.011349 |
| C  | -6.052175 | -0.370517 | -0.297835 |
| H  | -4.007551 | 0.273745  | -0.389597 |
| C  | -6.945620 | -1.439678 | -0.379347 |
| H  | -7.147072 | -3.565407 | -0.707643 |

|   |           |           |           |
|---|-----------|-----------|-----------|
| H | -6.421400 | 0.637572  | -0.095148 |
| H | -8.016271 | -1.274778 | -0.241455 |
| C | -3.571403 | 0.223601  | 2.775210  |
| H | -2.873392 | -0.563606 | 3.091738  |
| H | -4.079472 | 0.612349  | 3.670806  |
| H | -4.340469 | -0.236372 | 2.136249  |
| C | -3.621699 | 4.751481  | 0.526618  |
| H | -4.614503 | 4.821204  | 0.991853  |
| H | -3.067914 | 5.673798  | 0.755415  |
| H | -3.766496 | 4.721037  | -0.565435 |
| H | -0.962707 | 4.269764  | 0.326130  |
| H | -0.924754 | 0.375016  | 2.167759  |
| C | 0.058354  | -2.071084 | 1.498789  |
| H | 0.887162  | -2.110107 | 2.209329  |
| C | -1.081011 | -2.617436 | 1.438593  |
| C | -2.349736 | -2.995465 | 1.131882  |
| H | -2.536143 | -4.018874 | 0.794614  |
| H | -3.176879 | -2.515024 | 1.662542  |

51

Figure\_S1-1\_9d-Cu-allenyl / electronic energy: -2677.36469942 a.u. / lowest freq: 18.91 cm-1

|    |           |           |           |
|----|-----------|-----------|-----------|
| C  | -0.949725 | -2.111091 | -0.745708 |
| H  | -1.456710 | -2.283710 | -1.705397 |
| C  | 0.561005  | -2.346837 | -0.831595 |
| H  | 0.890390  | -3.232260 | -0.270668 |
| C  | 0.165570  | -0.172304 | -0.062012 |
| C  | 2.489588  | -0.947618 | -0.009125 |
| C  | 3.411595  | -1.770382 | -0.661262 |
| C  | 2.949352  | 0.031053  | 0.882181  |
| C  | 4.786704  | -1.603717 | -0.456366 |
| C  | 4.314605  | 0.217353  | 1.092648  |
| C  | 5.223765  | -0.605927 | 0.415840  |
| H  | 6.296282  | -0.467228 | 0.579491  |
| Cu | 0.319303  | 1.720856  | 0.321210  |
| N  | -1.018985 | -0.701736 | -0.358187 |
| N  | 1.108117  | -1.120853 | -0.238640 |
| H  | -1.611031 | 2.294197  | -1.821534 |
| H  | 0.899252  | -2.452084 | -1.873899 |
| H  | -1.438768 | -2.738242 | 0.015197  |
| C  | -2.263181 | 0.059952  | -0.389790 |
| H  | -2.079760 | 0.941851  | 0.244418  |
| C  | -3.394832 | -0.734034 | 0.234210  |
| C  | -4.274734 | -1.509681 | -0.527751 |
| C  | -3.538962 | -0.723986 | 1.626854  |
| C  | -5.279826 | -2.255582 | 0.089569  |
| H  | -4.183468 | -1.543227 | -1.615414 |
| C  | -4.540821 | -1.467687 | 2.245898  |
| H  | -2.855877 | -0.121511 | 2.231908  |
| C  | -5.415255 | -2.236764 | 1.476429  |
| H  | -5.958977 | -2.855647 | -0.519831 |
| H  | -4.643075 | -1.444096 | 3.332974  |
| H  | -6.203316 | -2.819047 | 1.958824  |
| C  | -2.550525 | 0.591965  | -1.802286 |
| H  | -3.536244 | 1.092393  | -1.782965 |
| H  | -2.627040 | -0.245072 | -2.514744 |
| O  | -1.535632 | 1.430876  | -2.265600 |
| C  | 4.800481  | 1.257189  | 2.068770  |
| H  | 4.053326  | 2.049530  | 2.216065  |
| H  | 5.002982  | 0.802287  | 3.051711  |
| H  | 5.735078  | 1.721832  | 1.723578  |
| C  | 5.770329  | -2.464765 | -1.205878 |
| H  | 6.734464  | -2.524069 | -0.682115 |
| H  | 5.386771  | -3.485941 | -1.343318 |
| H  | 5.962508  | -2.048637 | -2.207961 |
| H  | 3.073111  | -2.542835 | -1.353500 |
| H  | 2.231718  | 0.647662  | 1.427342  |
| C  | 0.056509  | 3.624341  | 0.493740  |
| H  | 0.571009  | 4.357231  | 1.130573  |
| C  | -0.918418 | 4.038216  | -0.261867 |
| C  | -1.925600 | 4.342938  | -1.074928 |
| H  | -2.962524 | 4.334227  | -0.721718 |
| H  | -1.744517 | 4.692912  | -2.096941 |

96

Figure\_S1-1\_PA-9d(NaOPh)-ts(1.6major) / electronic energy: -3988.22213482 a.u. / lowest freq: -455.12 cm-1

|    |           |           |           |
|----|-----------|-----------|-----------|
| C  | -3.327935 | -0.170787 | -1.529052 |
| H  | -4.192691 | -0.031508 | -0.867769 |
| C  | -2.662458 | 1.167411  | -1.862437 |
| H  | -2.655559 | 1.391704  | -2.938936 |
| C  | -1.099710 | -0.222582 | -0.802762 |
| C  | -0.307353 | 1.984154  | -1.521281 |
| C  | -0.693752 | 3.326459  | -1.474443 |
| C  | 1.035198  | 1.654344  | -1.714125 |
| C  | 0.261227  | 4.341403  | -1.568307 |
| C  | 2.003898  | 2.654658  | -1.817377 |
| C  | 1.606037  | 3.992765  | -1.733262 |
| H  | 2.359633  | 4.782000  | -1.811087 |
| Cu | 0.589861  | -0.977070 | -0.055773 |
| N  | -2.252470 | -0.892686 | -0.840558 |
| N  | -1.286505 | 0.971906  | -1.385249 |
| C  | 1.965462  | -1.086241 | 1.563534  |

|    |           |           |           |
|----|-----------|-----------|-----------|
| C  | 0.662027  | -0.741864 | 2.082639  |
| H  | -4.346931 | -0.894357 | 1.133336  |
| H  | -3.149871 | 1.996130  | -1.333085 |
| H  | -3.658809 | -0.718542 | -2.424534 |
| H  | 2.207410  | -2.145612 | 1.676566  |
| C  | 0.156130  | 0.624372  | 2.257305  |
| C  | -0.154870 | -1.838740 | 2.621282  |
| O  | 0.994914  | 1.557152  | 1.797065  |
| O  | -0.924652 | 0.939399  | 2.729923  |
| O  | -1.159894 | -1.740230 | 3.305429  |
| O  | 0.294497  | -3.051590 | 2.257921  |
| C  | -0.426588 | -4.176792 | 2.732978  |
| H  | -0.354837 | -4.256153 | 3.826921  |
| H  | 0.033866  | -5.051897 | 2.262414  |
| H  | -1.487690 | -4.108639 | 2.454327  |
| C  | 0.542522  | 2.902684  | 1.797709  |
| H  | -0.423369 | 2.988225  | 1.282248  |
| H  | 1.301639  | 3.473870  | 1.251265  |
| H  | 0.442156  | 3.281767  | 2.824648  |
| C  | -2.373061 | -2.267514 | -0.386333 |
| H  | -1.685211 | -2.369161 | 0.467484  |
| C  | -1.937462 | -3.280305 | -1.436109 |
| C  | -1.683413 | -4.598887 | -1.038105 |
| C  | -1.742102 | -2.940560 | -2.777612 |
| C  | -1.251371 | -5.553514 | -1.955278 |
| H  | -1.807979 | -4.881373 | 0.010719  |
| C  | -1.310564 | -3.895215 | -3.700081 |
| H  | -1.897914 | -1.914732 | -3.115175 |
| C  | -1.064815 | -5.205010 | -3.293562 |
| H  | -1.051187 | -6.573748 | -1.621048 |
| H  | -1.159109 | -3.607622 | -4.742649 |
| H  | -0.721669 | -5.950079 | -4.014199 |
| C  | -3.778561 | -2.558934 | 0.165904  |
| H  | -3.812528 | -3.629966 | 0.416967  |
| H  | -4.528915 | -2.408374 | -0.633139 |
| O  | -4.078303 | -1.835000 | 1.314456  |
| C  | 3.032978  | -0.282111 | 1.136206  |
| H  | 2.890660  | 0.791420  | 1.033708  |
| C  | 4.242865  | -0.875850 | 0.766478  |
| H  | 4.381132  | -1.910989 | 1.088387  |
| C  | 5.509869  | -0.119045 | 0.623319  |
| C  | 6.721975  | -0.824116 | 0.557491  |
| C  | 5.556988  | 1.282101  | 0.564712  |
| C  | 7.937097  | -0.157824 | 0.422689  |
| H  | 6.708202  | -1.916124 | 0.613352  |
| C  | 6.771171  | 1.950494  | 0.426032  |
| H  | 4.636864  | 1.864097  | 0.632769  |
| C  | 7.966812  | 1.235301  | 0.350907  |
| H  | 8.866906  | -0.728969 | 0.374719  |
| H  | 6.782858  | 3.041911  | 0.380514  |
| H  | 8.917917  | 1.760896  | 0.242826  |
| C  | 3.438840  | 2.280829  | -2.079289 |
| H  | 3.687790  | 1.316241  | -1.615480 |
| H  | 3.621636  | 2.181143  | -3.161356 |
| H  | 4.135300  | 3.039489  | -1.695484 |
| C  | -0.150970 | 5.784508  | -1.437302 |
| H  | 0.455210  | 6.436575  | -2.082376 |
| H  | -1.209991 | 5.926549  | -1.694249 |
| H  | -0.013809 | 6.131473  | -0.400079 |
| H  | -1.741173 | 3.589623  | -1.321334 |
| H  | 1.331896  | 0.608822  | -1.811012 |
| C  | 1.564418  | -1.991444 | -1.528407 |
| H  | 0.834209  | -2.419130 | -2.217874 |
| C  | 2.826855  | -1.914298 | -1.540685 |
| C  | 4.141091  | -1.648662 | -1.309680 |
| H  | 4.813686  | -2.478652 | -1.076657 |
| H  | 4.601615  | -0.814920 | -1.849771 |
| O  | -4.369248 | 0.677629  | 1.574864  |
| Na | -2.871114 | -0.291780 | 2.919350  |
| C  | -4.435046 | 1.836235  | 0.998837  |
| C  | -3.478783 | 2.858527  | 1.261779  |
| C  | -5.450364 | 2.153186  | 0.052960  |
| C  | -3.526907 | 4.085453  | 0.607708  |
| H  | -2.682447 | 2.640935  | 1.979065  |
| C  | -5.478837 | 3.380657  | -0.603153 |
| H  | -6.208769 | 1.393480  | -0.157842 |
| C  | -4.517069 | 4.362197  | -0.341689 |
| H  | -2.765505 | 4.839045  | 0.832557  |
| H  | -6.268084 | 3.577275  | -1.335127 |
| H  | -4.544731 | 5.324404  | -0.857420 |

51

Figure\_S1-1\_9d-Cu-allenyl / electronic energy: -2677.36469942 a.u. / lowest freq: 18.91 cm-1

|   |           |           |           |
|---|-----------|-----------|-----------|
| C | -0.949725 | -2.111091 | -0.745708 |
| H | -1.456710 | -2.283710 | -1.705397 |
| C | 0.561005  | -2.346837 | -0.831595 |
| H | 0.890390  | -3.232260 | -0.270668 |
| C | 0.165570  | -0.172304 | -0.062012 |
| C | 2.489588  | -0.947618 | -0.009125 |
| C | 3.411595  | -1.770382 | -0.661262 |



|    |           |           |           |
|----|-----------|-----------|-----------|
| C  | 2.949352  | 0.031053  | 0.882181  |
| C  | 4.786704  | -1.603717 | -0.456366 |
| C  | 4.314605  | 0.217353  | 1.092648  |
| C  | 5.223765  | -0.605927 | 0.415840  |
| H  | 6.296282  | -0.467228 | 0.579491  |
| Cu | 0.319303  | 1.720856  | 0.321210  |
| N  | -1.018985 | -0.701736 | -0.358187 |
| N  | 1.108117  | -1.120853 | -0.238640 |
| H  | -1.611031 | 2.294197  | -1.821534 |
| H  | 0.899252  | -2.452084 | -1.873899 |
| H  | -1.438768 | -2.738242 | 0.015197  |
| C  | -2.263181 | 0.059952  | -0.389790 |
| H  | -2.079760 | 0.941851  | 0.244418  |
| C  | -3.394832 | -0.734034 | 0.234210  |
| C  | -4.274734 | -1.509681 | -0.527751 |
| C  | -3.538962 | -0.723986 | 1.626854  |
| C  | -5.279826 | -2.255582 | 0.089569  |
| H  | -4.183468 | -1.543227 | -1.615414 |
| C  | -4.540821 | -1.467687 | 2.245898  |
| H  | -2.855877 | -0.121511 | 2.231908  |
| C  | -5.415255 | -2.236764 | 1.476429  |
| H  | -5.958977 | -2.855647 | -0.519831 |
| H  | -4.643075 | -1.444096 | 3.332974  |
| H  | -6.203316 | -2.819047 | 1.958824  |
| C  | -2.550525 | 0.591965  | -1.802286 |
| H  | -3.536244 | 1.092393  | -1.782965 |
| H  | -2.627040 | -0.245072 | -2.514744 |
| O  | -1.535632 | 1.430876  | -2.265600 |
| C  | 4.800481  | 1.257189  | 2.068770  |
| H  | 4.053326  | 2.049530  | 2.216065  |
| H  | 5.002982  | 0.802287  | 3.051711  |
| H  | 5.735078  | 1.721832  | 1.723578  |
| C  | 5.770329  | -2.464765 | -1.205878 |
| H  | 6.734464  | -2.524069 | -0.682115 |
| H  | 5.386771  | -3.485941 | -1.343318 |
| H  | 5.962508  | -2.048637 | -2.207961 |
| H  | 3.073111  | -2.542835 | -1.353500 |
| H  | 2.231718  | 0.647662  | 1.427342  |
| C  | 0.056509  | 3.624341  | 0.493740  |
| H  | 0.571009  | 4.357231  | 1.130573  |
| C  | -0.918418 | 4.038216  | -0.261867 |
| C  | -1.925600 | 4.342938  | -1.074928 |
| H  | -2.962524 | 4.334227  | -0.721718 |
| H  | -1.744517 | 4.692912  | -2.096941 |

83

Figure\_S1-1\_PA-9d-ts(1,6major) / electronic energy: -3519.31441637 a.u. / lowest freq: -439.92 cm<sup>-1</sup>

|    |           |           |           |
|----|-----------|-----------|-----------|
| C  | -2.736778 | 2.980363  | -0.100816 |
| H  | -3.290936 | 3.283679  | 0.795415  |
| C  | -1.325690 | 3.576136  | -0.149421 |
| H  | -1.204588 | 4.344022  | -0.925176 |
| C  | -1.184069 | 1.246358  | -0.307451 |
| C  | 0.887946  | 2.481105  | -0.706873 |
| C  | 1.678369  | 3.409484  | -0.031224 |
| C  | 1.463842  | 1.634344  | -1.660251 |
| C  | 3.057121  | 3.474558  | -0.272037 |
| C  | 2.831896  | 1.686408  | -1.919360 |
| C  | 3.616634  | 2.608887  | -1.213322 |
| H  | 4.691530  | 2.657028  | -1.411590 |
| Cu | -0.444180 | -0.604290 | -0.219012 |
| N  | -2.455482 | 1.544289  | -0.059072 |
| N  | -0.501014 | 2.398433  | -0.448224 |
| C  | 0.435762  | -1.900086 | 1.218416  |
| C  | -0.632618 | -1.219439 | 1.898582  |
| H  | -3.184290 | 0.995915  | 2.637551  |
| H  | -1.037244 | 4.013654  | 0.819465  |
| H  | -3.325204 | 3.232437  | -0.997558 |
| H  | 0.218940  | -2.945195 | 0.984524  |
| C  | -0.517462 | 0.086993  | 2.556672  |
| C  | -1.904101 | -1.944340 | 2.087930  |
| O  | 0.733423  | 0.574841  | 2.556386  |
| O  | -1.424964 | 0.733899  | 3.049959  |
| O  | -2.845490 | -1.597053 | 2.769282  |
| O  | -1.957551 | -3.086945 | 1.367753  |
| C  | -3.142634 | -3.855330 | 1.487274  |
| H  | -3.335951 | -4.122765 | 2.535440  |
| H  | -2.981264 | -4.760066 | 0.891056  |
| H  | -4.010171 | -3.301152 | 1.099118  |
| C  | 0.907953  | 1.887994  | 3.057037  |
| H  | 0.235117  | 2.591313  | 2.546699  |
| H  | 1.951759  | 2.153360  | 2.854963  |
| H  | 0.707939  | 1.929800  | 4.137041  |
| C  | -3.455591 | 0.510997  | 0.186955  |
| H  | -2.900711 | -0.299747 | 0.670800  |
| C  | -4.041833 | -0.044591 | -1.094581 |
| C  | -4.879407 | 0.718366  | -1.916774 |
| C  | -3.715293 | -1.347158 | -1.486729 |
| C  | -5.374389 | 0.189689  | -3.108165 |
| H  | -5.151130 | 1.737819  | -1.631291 |
| C  | -4.211455 | -1.879969 | -2.676226 |

|   |           |           |           |
|---|-----------|-----------|-----------|
| H | -3.057242 | -1.949712 | -0.853606 |
| C | -5.041715 | -1.110684 | -3.490551 |
| H | -6.024979 | 0.796875  | -3.741363 |
| H | -3.946926 | -2.899249 | -2.966012 |
| H | -5.432321 | -1.524624 | -4.422711 |
| C | -4.511278 | 0.957082  | 1.201807  |
| H | -5.131194 | 0.064881  | 1.414832  |
| H | -5.184746 | 1.708522  | 0.755021  |
| O | -3.958882 | 1.517221  | 2.349744  |
| C | 1.739897  | -1.471776 | 0.916535  |
| H | 2.024453  | -0.441405 | 1.120700  |
| C | 2.666245  | -2.339930 | 0.327314  |
| H | 2.472099  | -3.408456 | 0.441140  |
| C | 4.097715  | -1.979969 | 0.209306  |
| C | 5.064789  | -2.992382 | 0.123656  |
| C | 4.527600  | -0.644509 | 0.167979  |
| C | 6.418320  | -2.683106 | 0.003386  |
| H | 4.748429  | -4.038722 | 0.151984  |
| C | 5.879017  | -0.334526 | 0.045129  |
| H | 3.798470  | 0.167014  | 0.209303  |
| C | 6.831970  | -1.351384 | -0.037876 |
| H | 7.155027  | -3.487132 | -0.058777 |
| H | 6.188947  | 0.712717  | 0.008848  |
| H | 7.891900  | -1.107581 | -0.136669 |
| C | 3.453643  | 0.784503  | -2.952253 |
| H | 2.718755  | 0.074429  | -3.356039 |
| H | 3.862651  | 1.368923  | -3.790931 |
| H | 4.286178  | 0.210218  | -2.517492 |
| C | 3.913745  | 4.435523  | 0.510591  |
| H | 4.889948  | 4.588341  | 0.030316  |
| H | 3.423661  | 5.414093  | 0.618524  |
| H | 4.098158  | 4.049088  | 1.525977  |
| H | 1.233087  | 4.080990  | 0.705571  |
| H | 0.832392  | 0.935985  | -2.209739 |
| C | -0.075076 | -1.564201 | -1.970953 |
| H | -0.883180 | -1.376076 | -2.679607 |
| C | 1.038597  | -2.156753 | -2.060294 |
| C | 2.286944  | -2.654392 | -1.852506 |
| H | 2.428016  | -3.737762 | -1.801674 |
| H | 3.137313  | -2.087412 | -2.242056 |

51

Figure\_S1-1\_9d-Cu-allenyl / electronic energy: -2677.36469942 a.u. / lowest freq: 18.91 cm-1

|    |           |           |           |
|----|-----------|-----------|-----------|
| C  | -0.949725 | -2.111091 | -0.745708 |
| H  | -1.456710 | -2.283710 | -1.705397 |
| C  | 0.561005  | -2.346837 | -0.831595 |
| H  | 0.890390  | -3.232260 | -0.270668 |
| C  | 0.165570  | -0.172304 | -0.062012 |
| C  | 2.489588  | -0.947618 | -0.009125 |
| C  | 3.411595  | -1.770382 | -0.661262 |
| C  | 2.949352  | 0.031053  | 0.882181  |
| C  | 4.786704  | -1.603717 | -0.456366 |
| C  | 4.314605  | 0.217353  | 1.092648  |
| C  | 5.223765  | -0.605927 | 0.415840  |
| H  | 6.296282  | -0.467228 | 0.579491  |
| Cu | 0.319303  | 1.720856  | 0.321210  |
| N  | -1.018985 | -0.701736 | -0.358187 |
| N  | 1.108117  | -1.120853 | -0.238640 |
| H  | -1.611031 | 2.294197  | -1.821534 |
| H  | 0.899252  | -2.452084 | -1.873899 |
| H  | -1.438768 | -2.738242 | 0.015197  |
| C  | -2.263181 | 0.059952  | -0.389790 |
| H  | -2.079760 | 0.941851  | 0.244418  |
| C  | -3.394832 | -0.734034 | 0.234210  |
| C  | -4.274734 | -1.509681 | -0.527751 |
| C  | -3.538962 | -0.723986 | 1.626854  |
| C  | -5.279826 | -2.255582 | 0.089569  |
| H  | -4.183468 | -1.543227 | -1.615414 |
| C  | -4.540821 | -1.467687 | 2.245898  |
| H  | -2.855877 | -0.121511 | 2.231908  |
| C  | -5.415255 | -2.236764 | 1.476429  |
| H  | -5.958977 | -2.855647 | -0.519831 |
| H  | -4.643075 | -1.444096 | 3.332974  |
| H  | -6.203316 | -2.819047 | 1.958824  |
| C  | -2.550525 | 0.591965  | -1.802286 |
| H  | -3.536244 | 1.092393  | -1.782965 |
| H  | -2.627040 | -0.245072 | -2.514744 |
| O  | -1.535632 | 1.430876  | -2.265600 |
| C  | 4.800481  | 1.257189  | 2.068770  |
| H  | 4.053326  | 2.049530  | 2.216065  |
| H  | 5.002982  | 0.802287  | 3.051711  |
| H  | 5.735078  | 1.721832  | 1.723578  |
| C  | 5.770329  | -2.464765 | -1.205878 |
| H  | 6.734464  | -2.524069 | -0.682115 |
| H  | 5.386771  | -3.485941 | -1.343318 |
| H  | 5.962508  | -2.048637 | -2.207961 |
| H  | 3.073111  | -2.542835 | -1.353500 |
| H  | 2.231718  | 0.647662  | 1.427342  |
| C  | 0.056509  | 3.624341  | 0.493740  |
| H  | 0.571009  | 4.357231  | 1.130573  |

|   |           |          |           |
|---|-----------|----------|-----------|
| C | -0.918418 | 4.038216 | -0.261867 |
| C | -1.925600 | 4.342938 | -1.074928 |
| H | -2.962524 | 4.334227 | -0.721718 |
| H | -1.744517 | 4.692912 | -2.096941 |

51

Figure\_S1-1\_9d-Cu-allenyl / electronic energy: -2677.36469942 a.u. / lowest freq: 18.91 cm-1

|    |           |           |           |
|----|-----------|-----------|-----------|
| C  | -0.949725 | -2.111091 | -0.745708 |
| H  | -1.456710 | -2.283710 | -1.705397 |
| C  | 0.561005  | -2.346837 | -0.831595 |
| H  | 0.890390  | -3.232260 | -0.270668 |
| C  | 0.165570  | -0.172304 | -0.062012 |
| C  | 2.489588  | -0.947618 | -0.009125 |
| C  | 3.411595  | -1.770382 | -0.661262 |
| C  | 2.949352  | 0.031053  | 0.882181  |
| C  | 4.786704  | -1.603717 | -0.456366 |
| C  | 4.314605  | 0.217353  | 1.092648  |
| C  | 5.223765  | -0.605927 | 0.415840  |
| H  | 6.296282  | -0.467228 | 0.579491  |
| Cu | 0.319303  | 1.720856  | 0.321210  |
| N  | -1.018985 | -0.701736 | -0.358187 |
| N  | 1.108117  | -1.120853 | -0.238640 |
| H  | -1.611031 | 2.294197  | -1.821534 |
| H  | 0.899252  | -2.452084 | -1.873899 |
| H  | -1.438768 | -2.738242 | 0.015197  |
| C  | -2.263181 | 0.059952  | -0.389790 |
| H  | -2.079760 | 0.941851  | 0.244418  |
| C  | -3.394832 | -0.734034 | 0.234210  |
| C  | -4.274734 | -1.509681 | -0.527751 |
| C  | -3.538962 | -0.723986 | 1.626854  |
| C  | -5.279826 | -2.255582 | 0.089569  |
| H  | -4.183468 | -1.543227 | -1.615414 |
| C  | -4.540821 | -1.467687 | 2.245898  |
| H  | -2.855877 | -0.121511 | 2.231908  |
| C  | -5.415255 | -2.236764 | 1.476429  |
| H  | -5.958977 | -2.855647 | -0.519831 |
| H  | -4.643075 | -1.444096 | 3.332974  |
| H  | -6.203316 | -2.819047 | 1.958824  |
| C  | -2.550525 | 0.591965  | -1.802286 |
| H  | -3.536244 | 1.092393  | -1.782965 |
| H  | -2.627040 | -0.245072 | -2.514744 |
| O  | -1.535632 | 1.430876  | -2.265600 |
| C  | 4.800481  | 1.257189  | 2.068770  |
| H  | 4.053326  | 2.049530  | 2.216065  |
| H  | 5.002982  | 0.802287  | 3.051711  |
| H  | 5.735078  | 1.721832  | 1.723578  |
| C  | 5.770329  | -2.464765 | -1.205878 |
| H  | 6.734464  | -2.524069 | -0.682115 |
| H  | 5.386771  | -3.485941 | -1.343318 |
| H  | 5.962508  | -2.048637 | -2.207961 |
| H  | 3.073111  | -2.542835 | -1.353500 |
| H  | 2.231718  | 0.647662  | 1.427342  |
| C  | 0.056509  | 3.624341  | 0.493740  |
| H  | 0.571009  | 4.357231  | 1.130573  |
| C  | -0.918418 | 4.038216  | -0.261867 |
| C  | -1.925600 | 4.342938  | -1.074928 |
| H  | -2.962524 | 4.334227  | -0.721718 |
| H  | -1.744517 | 4.692912  | -2.096941 |

116

Figure\_S1-1\_PA-9d(Naborate)-ts(1,6major) / electronic energy: -4398.56325172 a.u. / lowest freq: -433.67 cm-1

|    |           |           |           |
|----|-----------|-----------|-----------|
| H  | 5.797940  | 2.532949  | 0.596683  |
| H  | 6.963864  | 3.051104  | -1.899424 |
| H  | 4.704182  | 2.588892  | -1.456197 |
| H  | 9.243414  | 2.365363  | -2.578522 |
| C  | 7.185485  | 1.992191  | -2.058303 |
| C  | 4.820159  | 1.501774  | -1.468964 |
| C  | 8.469503  | 1.607186  | -2.439232 |
| C  | 6.169159  | 1.042761  | -1.874278 |
| C  | 8.764441  | 0.259393  | -2.641663 |
| H  | 9.770085  | -0.046006 | -2.938646 |
| C  | 6.480921  | -0.310027 | -2.079656 |
| C  | 7.763505  | -0.696598 | -2.459469 |
| H  | 5.717070  | -1.074501 | -1.933309 |
| H  | 7.983070  | -1.755376 | -2.614234 |
| H  | 2.438478  | 2.469411  | -1.445404 |
| C  | 2.401070  | 1.384218  | -1.570359 |
| C  | 3.656844  | 0.768668  | -1.698867 |
| H  | 3.714699  | -0.294662 | -1.919598 |
| Cu | 1.507608  | 0.800125  | 0.251881  |
| H  | 2.320983  | 1.584188  | 2.613719  |
| C  | 2.816334  | 1.503532  | 1.645373  |
| C  | 4.036234  | 1.601539  | 1.319164  |
| C  | 5.249099  | 1.594260  | 0.710811  |
| H  | 5.864106  | 0.693390  | 0.802860  |
| N  | -1.026655 | 0.400537  | 1.792347  |
| C  | 0.187997  | -0.034738 | 1.493140  |
| N  | 0.505244  | -1.020444 | 2.363082  |
| C  | -1.679766 | 1.539683  | 1.163268  |
| O  | -1.098164 | 1.745558  | -2.486599 |
| C  | -0.002847 | 1.892539  | -1.972662 |

|    |           |           |           |
|----|-----------|-----------|-----------|
| C  | 1.067162  | 0.888066  | -1.849207 |
| C  | 0.755689  | -0.473962 | -2.291986 |
| O  | -0.325745 | -0.878846 | -2.688079 |
| Na | -2.439204 | -0.111997 | -2.458558 |
| C  | -1.659965 | -0.334294 | 2.892038  |
| H  | -2.474603 | -0.953758 | 2.485630  |
| C  | -0.497912 | -1.172478 | 3.423451  |
| H  | -0.106956 | -0.783907 | 4.377396  |
| C  | 1.709463  | -1.750512 | 2.359546  |
| C  | 2.216392  | -2.261967 | 3.557834  |
| C  | 2.402592  | -1.972775 | 1.164723  |
| C  | 3.428201  | -2.959665 | 3.579132  |
| C  | 3.622301  | -2.650087 | 1.169806  |
| C  | 4.126227  | -3.133691 | 2.381732  |
| H  | 5.082603  | -3.664722 | 2.390182  |
| H  | -0.759283 | -2.231265 | 3.562096  |
| H  | -2.057864 | 0.362722  | 3.643188  |
| O  | 1.789937  | -1.322322 | -2.201774 |
| O  | 0.325697  | 3.069818  | -1.413527 |
| C  | -0.638959 | 4.110192  | -1.475433 |
| H  | -1.559434 | 3.823064  | -0.946855 |
| H  | -0.182540 | 4.974211  | -0.981411 |
| H  | -0.884938 | 4.353105  | -2.518214 |
| C  | 1.538111  | -2.676445 | -2.555045 |
| H  | 0.794126  | -3.118315 | -1.877999 |
| H  | 2.495572  | -3.197444 | -2.453929 |
| H  | 1.173497  | -2.751001 | -3.588143 |
| H  | -1.107974 | 1.729853  | 0.247704  |
| C  | -1.567424 | 2.770362  | 2.048398  |
| C  | -2.580522 | 3.161824  | 2.929091  |
| C  | -0.381326 | 3.515127  | 2.011813  |
| C  | -2.408999 | 4.272196  | 3.758101  |
| H  | -3.518394 | 2.604533  | 2.977122  |
| C  | -0.207111 | 4.621762  | 2.838485  |
| H  | 0.414178  | 3.218507  | 1.322020  |
| C  | -1.223161 | 5.002934  | 3.716930  |
| H  | -3.209278 | 4.565736  | 4.440857  |
| H  | 0.725013  | 5.189431  | 2.795241  |
| H  | -1.090477 | 5.870677  | 4.366709  |
| C  | -3.102147 | 1.195727  | 0.726247  |
| H  | -3.565954 | 2.126491  | 0.344385  |
| H  | -3.711022 | 0.880817  | 1.592180  |
| O  | -3.071367 | 0.214200  | -0.250899 |
| C  | 4.369762  | -2.887830 | -0.115225 |
| H  | 5.448935  | -2.721817 | 0.015765  |
| H  | 4.236634  | -3.924519 | -0.463539 |
| H  | 4.009647  | -2.218049 | -0.906763 |
| C  | 3.966447  | -3.521524 | 4.869366  |
| H  | 5.054835  | -3.382583 | 4.941202  |
| H  | 3.500524  | -3.046144 | 5.743557  |
| H  | 3.770177  | -4.603731 | 4.934819  |
| H  | 1.681928  | -2.101669 | 4.495436  |
| H  | 1.987152  | -1.622060 | 0.218058  |
| B  | -3.955752 | -0.968938 | -0.157641 |
| O  | -3.561335 | -1.948622 | 0.837021  |
| O  | -3.801069 | -1.636254 | -1.455632 |
| C  | -2.944746 | -3.043413 | 0.190100  |
| C  | -3.614876 | -3.023493 | -1.233659 |
| C  | -2.741031 | -3.593031 | -2.346054 |
| H  | -3.280017 | -3.546882 | -3.304995 |
| H  | -1.805361 | -3.026327 | -2.451580 |
| H  | -2.492660 | -4.647672 | -2.150344 |
| C  | -4.985543 | -3.707657 | -1.243293 |
| H  | -4.900788 | -4.800419 | -1.148349 |
| H  | -5.616383 | -3.327717 | -0.427397 |
| H  | -5.487906 | -3.481155 | -2.195588 |
| C  | -1.430980 | -2.807110 | 0.117846  |
| H  | -0.903506 | -3.665260 | -0.325062 |
| H  | -1.042361 | -2.669058 | 1.135456  |
| H  | -1.191603 | -1.904243 | -0.461136 |
| C  | -3.214393 | -4.312965 | 0.990678  |
| H  | -2.697577 | -4.255947 | 1.960973  |
| H  | -4.286877 | -4.439776 | 1.186406  |
| H  | -2.843171 | -5.203759 | 0.460490  |
| H  | -4.610150 | 1.252894  | -1.676818 |
| O  | -5.347213 | -0.579939 | 0.160886  |
| C  | -5.680666 | 1.082496  | -1.571193 |
| C  | -6.139906 | 0.144820  | -0.625528 |
| C  | -6.584975 | 1.809712  | -2.344734 |
| C  | -7.531013 | -0.022198 | -0.484538 |
| C  | -7.960883 | 1.633784  | -2.200219 |
| H  | -7.887528 | -0.748057 | 0.249610  |
| C  | -8.424465 | 0.712031  | -1.258077 |
| H  | -8.661643 | 2.208738  | -2.809070 |
| H  | -9.498682 | 0.558890  | -1.125271 |
| H  | -6.201335 | 2.532592  | -3.069896 |

96

Figure\_S2-1\_PA-9d(NaO<sub>Ph</sub>)-prod(1,6major) / electronic energy: -3988.27463791 a.u. / lowest freq: 15.81 cm<sup>-1</sup>

C -3.069461 -0.943531 -1.551036

|    |           |           |           |
|----|-----------|-----------|-----------|
| H  | -3.830375 | -1.333363 | -0.864874 |
| C  | -3.096060 | 0.583016  | -1.602848 |
| H  | -3.494752 | 0.978567  | -2.546818 |
| C  | -0.923421 | -0.131742 | -1.104049 |
| C  | -1.247854 | 2.274913  | -1.407850 |
| C  | -2.155548 | 3.278848  | -1.054115 |
| C  | 0.078928  | 2.612526  | -1.682110 |
| C  | -1.729656 | 4.601019  | -0.911049 |
| C  | 0.527833  | 3.926615  | -1.532938 |
| C  | -0.384391 | 4.910537  | -1.142188 |
| H  | -0.043819 | 5.943558  | -1.026695 |
| Cu | 1.050643  | -0.162533 | -0.912653 |
| N  | -1.711949 | -1.205864 | -1.064845 |
| N  | -1.677050 | 0.930042  | -1.455583 |
| C  | 2.026921  | -0.798391 | 1.142905  |
| C  | 0.875185  | -0.980829 | 1.995714  |
| H  | -3.572693 | -2.558814 | 0.828612  |
| H  | -3.682783 | 0.996961  | -0.772566 |
| H  | -3.219795 | -1.400172 | -2.542618 |
| H  | 2.560321  | -1.738597 | 0.969959  |
| C  | -0.065893 | 0.072636  | 2.296850  |
| C  | 0.599378  | -2.310886 | 2.487796  |
| O  | 0.293232  | 1.260104  | 1.772223  |
| O  | -1.118223 | -0.018442 | 2.924842  |
| O  | -0.355427 | -2.675082 | 3.169031  |
| O  | 1.517063  | -3.234608 | 2.104283  |
| C  | 1.268694  | -4.576251 | 2.478831  |
| H  | 1.192092  | -4.679522 | 3.570356  |
| H  | 2.120573  | -5.157848 | 2.107983  |
| H  | 0.338182  | -4.949008 | 2.024589  |
| C  | -0.609766 | 2.339958  | 1.927419  |
| H  | -1.592940 | 2.095497  | 1.502689  |
| H  | -0.174117 | 3.182642  | 1.376685  |
| H  | -0.735020 | 2.601386  | 2.988240  |
| C  | -1.188009 | -2.525621 | -0.713197 |
| H  | -0.615876 | -2.390227 | 0.215550  |
| C  | -0.234662 | -3.054547 | -1.766059 |
| C  | 1.028570  | -3.511855 | -1.378364 |
| C  | -0.586532 | -3.099123 | -3.120157 |
| C  | 1.928988  | -3.999769 | -2.325490 |
| H  | 1.311609  | -3.469209 | -0.322807 |
| C  | 0.311693  | -3.588247 | -4.067897 |
| H  | -1.565660 | -2.738644 | -3.444788 |
| C  | 1.573331  | -4.038408 | -3.672545 |
| H  | 2.915926  | -4.343619 | -2.008449 |
| H  | 0.026631  | -3.616908 | -5.121908 |
| H  | 2.278599  | -4.414594 | -4.416561 |
| C  | -2.290728 | -3.541020 | -0.380862 |
| H  | -1.793746 | -4.521120 | -0.317124 |
| H  | -3.008141 | -3.610998 | -1.221008 |
| O  | -2.925128 | -3.312492 | 0.835938  |
| C  | 2.617945  | 0.294840  | 0.550376  |
| H  | 2.268614  | 1.305646  | 0.775116  |
| C  | 3.966513  | 0.164182  | -0.136447 |
| H  | 4.208887  | -0.908261 | -0.202199 |
| C  | 5.082556  | 0.846193  | 0.634462  |
| C  | 6.194940  | 0.118841  | 1.069126  |
| C  | 5.028576  | 2.216884  | 0.920081  |
| C  | 7.229351  | 0.741642  | 1.769076  |
| H  | 6.253401  | -0.952308 | 0.857857  |
| C  | 6.059129  | 2.843063  | 1.617942  |
| H  | 4.167139  | 2.808031  | 0.598007  |
| C  | 7.165380  | 2.106488  | 2.044634  |
| H  | 8.089591  | 0.155352  | 2.100116  |
| H  | 5.996910  | 3.912660  | 1.830441  |
| H  | 7.974445  | 2.596150  | 2.591060  |
| C  | 1.977881  | 4.253765  | -1.776163 |
| H  | 2.587342  | 3.971759  | -0.901929 |
| H  | 2.371506  | 3.705056  | -2.644438 |
| H  | 2.129635  | 5.327713  | -1.949677 |
| C  | -2.696194 | 5.664165  | -0.458192 |
| H  | -2.508601 | 6.621372  | -0.965663 |
| H  | -3.737931 | 5.369396  | -0.646169 |
| H  | -2.591985 | 5.842264  | 0.624247  |
| H  | -3.197268 | 3.033709  | -0.842291 |
| H  | 0.770306  | 1.849252  | -2.041298 |
| C  | 1.922994  | -0.497929 | -2.955311 |
| H  | 1.243892  | -1.009372 | -3.619659 |
| C  | 2.812610  | 0.047769  | -2.320097 |
| C  | 3.903154  | 0.695679  | -1.586493 |
| H  | 4.857478  | 0.529956  | -2.110037 |
| H  | 3.723092  | 1.783093  | -1.580987 |
| O  | -4.276615 | -1.306631 | 1.619256  |
| Na | -2.460469 | -1.871603 | 2.835282  |
| C  | -4.778897 | -0.154461 | 1.305155  |
| C  | -4.246843 | 1.061117  | 1.824665  |
| C  | -5.870783 | -0.025492 | 0.400897  |
| C  | -4.747181 | 2.300222  | 1.437479  |
| H  | -3.400112 | 0.993438  | 2.513177  |

|   |           |           |           |
|---|-----------|-----------|-----------|
| C | -6.357621 | 1.221398  | 0.017739  |
| H | -6.310911 | -0.941561 | -0.004102 |
| C | -5.801066 | 2.401631  | 0.522013  |
| H | -4.295429 | 3.208997  | 1.847678  |
| H | -7.187454 | 1.274677  | -0.693600 |
| H | -6.186364 | 3.377013  | 0.216946  |

96

Figure\_S2-1\_PA-9d(NaOPh)-ts(1,6major) / electronic energy: -3988.22213482 a.u. / lowest freq: -455.12 cm<sup>-1</sup>

|    |           |           |           |
|----|-----------|-----------|-----------|
| C  | -3.327935 | -0.170787 | -1.529052 |
| H  | -4.192691 | -0.031508 | -0.867769 |
| C  | -2.662458 | 1.167411  | -1.862437 |
| H  | -2.655559 | 1.391704  | -2.938936 |
| C  | -1.099710 | -0.222582 | -0.802762 |
| C  | -0.307353 | 1.984154  | -1.521281 |
| C  | -0.693752 | 3.326459  | -1.474443 |
| C  | 1.035198  | 1.654344  | -1.714125 |
| C  | 0.261227  | 4.341403  | -1.568307 |
| C  | 2.003898  | 2.654658  | -1.817377 |
| C  | 1.606037  | 3.992765  | -1.733262 |
| H  | 2.359633  | 4.782000  | -1.811087 |
| Cu | 0.589861  | -0.977070 | -0.055773 |
| N  | -2.252470 | -0.892686 | -0.840558 |
| N  | -1.286505 | 0.971906  | -1.385249 |
| C  | 1.965462  | -1.086241 | 1.563534  |
| C  | 0.662027  | -0.741864 | 2.082639  |
| H  | -4.346931 | -0.894357 | 1.133336  |
| H  | -3.149871 | 1.996130  | -1.333085 |
| H  | -3.658809 | -0.718542 | -2.424534 |
| H  | 2.207410  | -2.145612 | 1.676566  |
| C  | 0.156130  | 0.624372  | 2.257305  |
| C  | -0.154870 | -1.838740 | 2.621282  |
| O  | 0.994914  | 1.557152  | 1.797065  |
| O  | -0.924652 | 0.939399  | 2.729923  |
| O  | -1.159894 | -1.740230 | 3.305429  |
| O  | 0.294497  | -3.051590 | 2.257921  |
| C  | -0.426588 | -4.176792 | 2.732978  |
| H  | -0.354837 | -4.256153 | 3.826921  |
| H  | 0.033866  | -5.051897 | 2.262414  |
| H  | -1.487690 | -4.108639 | 2.454327  |
| C  | 0.542522  | 2.902684  | 1.797709  |
| H  | -0.423369 | 2.988225  | 1.282248  |
| H  | 1.301639  | 3.473870  | 1.251265  |
| H  | 0.442156  | 3.281767  | 2.824648  |
| C  | -2.373061 | -2.267514 | -0.386333 |
| H  | -1.685211 | -2.369161 | 0.467484  |
| C  | -1.937462 | -3.280305 | -1.436109 |
| C  | -1.683413 | -4.598887 | -1.038105 |
| C  | -1.742102 | -2.940560 | -2.777612 |
| C  | -1.251371 | -5.553514 | -1.955278 |
| H  | -1.807979 | -4.881373 | 0.010719  |
| C  | -1.310564 | -3.895215 | -3.700081 |
| H  | -1.897914 | -1.914732 | -3.115175 |
| C  | -1.064815 | -5.205010 | -3.293562 |
| H  | -1.051187 | -6.573748 | -1.621048 |
| H  | -1.159109 | -3.607622 | -4.742649 |
| H  | -0.721669 | -5.950079 | -4.014199 |
| C  | -3.778561 | -2.558934 | 0.165904  |
| H  | -3.812528 | -3.629966 | 0.416967  |
| H  | -4.528915 | -2.408374 | -0.633139 |
| O  | -4.078303 | -1.835000 | 1.314456  |
| C  | 3.032978  | -0.282111 | 1.136206  |
| H  | 2.890660  | 0.791420  | 1.033708  |
| C  | 4.242865  | -0.875850 | 0.766478  |
| H  | 4.381132  | -1.910989 | 1.088387  |
| C  | 5.509869  | -0.119045 | 0.623319  |
| C  | 6.721975  | -0.824116 | 0.557491  |
| C  | 5.556988  | 1.282101  | 0.564712  |
| C  | 7.937097  | -0.157824 | 0.422689  |
| H  | 6.708202  | -1.916124 | 0.613352  |
| C  | 6.771171  | 1.950494  | 0.426032  |
| H  | 4.636864  | 1.864097  | 0.632769  |
| C  | 7.966812  | 1.235301  | 0.350907  |
| H  | 8.866906  | -0.728969 | 0.374719  |
| H  | 6.782858  | 3.041911  | 0.380514  |
| H  | 8.917917  | 1.760896  | 0.242826  |
| C  | 3.438840  | 2.280829  | -2.079289 |
| H  | 3.687790  | 1.316241  | -1.615480 |
| H  | 3.621636  | 2.181143  | -3.161356 |
| H  | 4.135300  | 3.039489  | -1.695484 |
| C  | -0.150970 | 5.784508  | -1.437302 |
| H  | 0.455210  | 6.436575  | -2.082376 |
| H  | -1.209991 | 5.926549  | -1.694249 |
| H  | -0.013809 | 6.131473  | -0.400079 |
| H  | -1.741173 | 3.589623  | -1.321334 |
| H  | 1.331896  | 0.608822  | -1.811012 |
| C  | 1.564418  | -1.991444 | -1.528407 |
| H  | 0.834209  | -2.419130 | -2.217874 |
| C  | 2.826855  | -1.914298 | -1.540685 |
| C  | 4.141091  | -1.648662 | -1.309680 |

|    |           |           |           |
|----|-----------|-----------|-----------|
| H  | 4.813686  | -2.478652 | -1.076657 |
| H  | 4.601615  | -0.814920 | -1.849771 |
| O  | -4.369248 | 0.677629  | 1.574864  |
| Na | -2.871114 | -0.291780 | 2.919350  |
| C  | -4.435046 | 1.836235  | 0.998837  |
| C  | -3.478783 | 2.858527  | 1.261779  |
| C  | -5.450364 | 2.153186  | 0.052960  |
| C  | -3.526907 | 4.085453  | 0.607708  |
| H  | -2.682447 | 2.640935  | 1.979065  |
| C  | -5.478837 | 3.380657  | -0.603153 |
| H  | -6.208769 | 1.393480  | -0.157842 |
| C  | -4.517069 | 4.362197  | -0.341689 |
| H  | -2.765505 | 4.839045  | 0.832557  |
| H  | -6.268084 | 3.577275  | -1.335127 |
| H  | -4.544731 | 5.324404  | -0.857420 |

96

Figure\_S2-1\_PA-9d(NaOPh)-pc(1,6major) / electronic energy: -3988.23491900 a.u. / lowest freq: 15.62 cm-1

|    |           |           |           |
|----|-----------|-----------|-----------|
| C  | 3.293820  | 0.253128  | -1.512928 |
| H  | 4.151525  | 0.027802  | -0.864619 |
| C  | 2.577367  | -1.027974 | -1.950113 |
| H  | 2.484453  | -1.123997 | -3.042171 |
| C  | 1.101323  | 0.287583  | -0.692360 |
| C  | 0.246722  | -1.865855 | -1.495431 |
| C  | 0.625576  | -3.199910 | -1.658893 |
| C  | -1.111793 | -1.528291 | -1.487882 |
| C  | -0.340303 | -4.206088 | -1.765463 |
| C  | -2.089463 | -2.518154 | -1.588517 |
| C  | -1.690642 | -3.853931 | -1.720258 |
| H  | -2.453078 | -4.634494 | -1.801099 |
| Cu | -0.570661 | 1.021673  | 0.095918  |
| N  | 2.249671  | 0.957485  | -0.762261 |
| N  | 1.243254  | -0.872684 | -1.353180 |
| C  | -1.943542 | 1.083455  | 1.609587  |
| C  | -0.715925 | 0.560844  | 2.113002  |
| H  | 4.159726  | 0.614190  | 1.279370  |
| H  | 3.085420  | -1.918180 | -1.558830 |
| H  | 3.645303  | 0.861331  | -2.359565 |
| H  | -2.096361 | 2.147597  | 1.798133  |
| C  | -0.339091 | -0.871923 | 2.215584  |
| C  | 0.200863  | 1.525651  | 2.780763  |
| O  | -1.304975 | -1.708456 | 1.856918  |
| O  | 0.755558  | -1.277586 | 2.556329  |
| O  | 1.069199  | 1.253145  | 3.583895  |
| O  | -0.019287 | 2.785561  | 2.399100  |
| C  | 0.804198  | 3.793134  | 2.974664  |
| H  | 0.643620  | 3.852446  | 4.059630  |
| H  | 0.508540  | 4.731263  | 2.494582  |
| H  | 1.864726  | 3.581375  | 2.779154  |
| C  | -0.968277 | -3.087862 | 1.756120  |
| H  | -0.181161 | -3.232432 | 1.002284  |
| H  | -1.884487 | -3.596013 | 1.438711  |
| H  | -0.627878 | -3.477413 | 2.724860  |
| C  | 2.426885  | 2.294452  | -0.226878 |
| H  | 1.646093  | 2.414329  | 0.539974  |
| C  | 2.209212  | 3.384011  | -1.270353 |
| C  | 2.322089  | 4.731044  | -0.899581 |
| C  | 1.838873  | 3.087659  | -2.585489 |
| C  | 2.091585  | 5.749414  | -1.821782 |
| H  | 2.575574  | 4.996749  | 0.129400  |
| C  | 1.609437  | 4.105308  | -3.511813 |
| H  | 1.697712  | 2.050898  | -2.894075 |
| C  | 1.740100  | 5.440285  | -3.136078 |
| H  | 2.183061  | 6.791957  | -1.509271 |
| H  | 1.319698  | 3.848648  | -4.533021 |
| H  | 1.559112  | 6.236984  | -3.860642 |
| C  | 3.779876  | 2.413761  | 0.496384  |
| H  | 3.868533  | 3.437796  | 0.887601  |
| H  | 4.599190  | 2.292766  | -0.237374 |
| O  | 3.896738  | 1.530977  | 1.564363  |
| C  | -3.150421 | 0.358403  | 1.245144  |
| H  | -3.102329 | -0.727846 | 1.202850  |
| C  | -4.294723 | 1.010348  | 0.954187  |
| H  | -4.284206 | 2.105783  | 0.959150  |
| C  | -5.585206 | 0.390757  | 0.628110  |
| C  | -6.625140 | 1.195258  | 0.134726  |
| C  | -5.832603 | -0.981828 | 0.799531  |
| C  | -7.859501 | 0.646280  | -0.204932 |
| H  | -6.456198 | 2.267915  | 0.008510  |
| C  | -7.065207 | -1.531383 | 0.461858  |
| H  | -5.054970 | -1.628496 | 1.210507  |
| C  | -8.082964 | -0.721135 | -0.046310 |
| H  | -8.651181 | 1.290624  | -0.593293 |
| H  | -7.236739 | -2.600833 | 0.602502  |
| H  | -9.049897 | -1.155317 | -0.309240 |
| C  | -3.549729 | -2.151005 | -1.591534 |
| H  | -3.703872 | -1.096015 | -1.324504 |
| H  | -3.990993 | -2.311332 | -2.588175 |
| H  | -4.116836 | -2.776460 | -0.886251 |
| C  | 0.083776  | -5.647858 | -1.871009 |

|    |           |           |           |
|----|-----------|-----------|-----------|
| H  | -0.648034 | -6.243816 | -2.434397 |
| H  | 1.062514  | -5.744206 | -2.361937 |
| H  | 0.174442  | -6.098686 | -0.869188 |
| H  | 1.680462  | -3.473858 | -1.670686 |
| H  | -1.419467 | -0.481175 | -1.444504 |
| C  | -1.464180 | 2.201522  | -1.212601 |
| H  | -0.874660 | 3.065326  | -1.556361 |
| C  | -2.609389 | 1.964938  | -1.775932 |
| C  | -3.773819 | 1.642490  | -2.314607 |
| H  | -4.716711 | 2.032074  | -1.918749 |
| H  | -3.831726 | 0.980195  | -3.185093 |
| O  | 4.186868  | -0.990639 | 1.509218  |
| Na | 2.769739  | -0.215890 | 3.036467  |
| C  | 4.261298  | -2.090344 | 0.826979  |
| C  | 3.290727  | -3.122607 | 0.966387  |
| C  | 5.302707  | -2.327780 | -0.113515 |
| C  | 3.355700  | -4.288289 | 0.210542  |
| H  | 2.467283  | -2.961812 | 1.667905  |
| C  | 5.345941  | -3.492671 | -0.874863 |
| H  | 6.071247  | -1.558043 | -0.231529 |
| C  | 4.373724  | -4.487574 | -0.728133 |
| H  | 2.582905  | -5.052329 | 0.341252  |
| H  | 6.155753  | -3.628740 | -1.598099 |
| H  | 4.413365  | -5.401447 | -1.324824 |

64

Figure\_S2-1\_9d(NaOPh)-Cu-allenyl / electronic energy: -3146.25617778 a.u. / lowest freq: 11.92 cm<sup>-1</sup>

|    |           |           |           |
|----|-----------|-----------|-----------|
| Cu | -0.619467 | -0.796156 | 0.827096  |
| C  | -0.346515 | -2.401130 | 1.871679  |
| C  | -0.937222 | 0.741398  | -0.321533 |
| N  | -2.143873 | 1.194277  | -0.727784 |
| N  | 0.001999  | 1.491143  | -0.883402 |
| C  | 1.428889  | 1.329861  | -0.605320 |
| C  | 0.000505  | -3.552073 | 1.370637  |
| C  | 0.379012  | -4.681143 | 0.783804  |
| C  | -0.538280 | 2.590848  | -1.682850 |
| H  | -0.064878 | 2.614677  | -2.671898 |
| C  | -2.024791 | 2.234507  | -1.754997 |
| H  | -2.687930 | 3.081346  | -1.533017 |
| C  | -3.384438 | 0.644678  | -0.341043 |
| C  | -4.475496 | 0.689404  | -1.214462 |
| C  | -3.536012 | 0.067039  | 0.924065  |
| C  | -5.702527 | 0.127497  | -0.846977 |
| C  | -4.745649 | -0.518589 | 1.301216  |
| C  | -5.819800 | -0.481859 | 0.406051  |
| H  | -6.774855 | -0.927927 | 0.697213  |
| H  | 1.928082  | -0.165857 | -2.634416 |
| H  | -2.295340 | 1.829362  | -2.742745 |
| H  | -0.361921 | 3.553497  | -1.177043 |
| H  | 1.548128  | 0.269518  | -0.343982 |
| C  | 1.868628  | 2.158545  | 0.586139  |
| C  | 2.053601  | 3.544278  | 0.504275  |
| C  | 2.081183  | 1.523956  | 1.815389  |
| C  | 2.431048  | 4.278172  | 1.628804  |
| H  | 1.910466  | 4.065296  | -0.445429 |
| C  | 2.459838  | 2.254661  | 2.940604  |
| H  | 1.953127  | 0.439958  | 1.885623  |
| C  | 2.633553  | 3.635791  | 2.850098  |
| H  | 2.572759  | 5.358128  | 1.547429  |
| H  | 2.623645  | 1.742288  | 3.891151  |
| H  | 2.931610  | 4.210602  | 3.729810  |
| C  | 2.268177  | 1.568157  | -1.865892 |
| H  | 3.322384  | 1.385089  | -1.581130 |
| H  | 2.205771  | 2.626217  | -2.173769 |
| O  | 1.853004  | 0.780671  | -2.934328 |
| H  | -0.497865 | -2.385581 | 2.963745  |
| H  | 1.440706  | -4.937140 | 0.691804  |
| H  | -0.352724 | -5.417789 | 0.434912  |
| O  | 2.095699  | -1.595484 | -1.830360 |
| C  | 3.222727  | -1.564585 | -1.170414 |
| C  | 4.447353  | -1.226071 | -1.804986 |
| C  | 3.281741  | -1.828571 | 0.224015  |
| C  | 5.640423  | -1.157639 | -1.091733 |
| H  | 4.422841  | -1.005951 | -2.875978 |
| C  | 4.482514  | -1.757915 | 0.926085  |
| H  | 2.350068  | -2.074064 | 0.744595  |
| C  | 5.675802  | -1.422792 | 0.280923  |
| H  | 6.562662  | -0.890149 | -1.616402 |
| H  | 4.483811  | -1.961209 | 2.001267  |
| H  | 6.614856  | -1.365732 | 0.835649  |
| Na | 0.382018  | -2.891610 | -1.448261 |
| C  | -4.878061 | -1.148536 | 2.663108  |
| H  | -4.770153 | -0.392767 | 3.456561  |
| H  | -5.854279 | -1.635792 | 2.789687  |
| H  | -4.092521 | -1.902634 | 2.823354  |
| C  | -6.862411 | 0.151859  | -1.808539 |
| H  | -7.814286 | -0.041059 | -1.295092 |
| H  | -6.937309 | 1.122263  | -2.320462 |
| H  | -6.741086 | -0.619441 | -2.586003 |
| H  | -2.706191 | 0.090239  | 1.634257  |



H -4.376491 1.152925 -2.197690

64

Figure\_S2-1\_9b(NaOPh)-Cu-allenyl / electronic energy: -3146.25183127 a.u. / lowest freq: 14.48 cm<sup>-1</sup>

|    |           |           |           |
|----|-----------|-----------|-----------|
| Cu | -1.159994 | -0.590393 | 1.249005  |
| C  | -1.116318 | -1.661983 | 2.858319  |
| C  | -1.308620 | 0.472985  | -0.363800 |
| N  | -2.371853 | 0.399588  | -1.177453 |
| N  | -0.493582 | 1.418385  | -0.819509 |
| C  | 0.814281  | 1.723428  | -0.265472 |
| C  | -0.596166 | -2.849269 | 2.995372  |
| C  | -0.025278 | -4.043820 | 3.070053  |
| C  | -0.945998 | 2.002813  | -2.084278 |
| H  | -0.272077 | 1.686950  | -2.894296 |
| C  | -2.351352 | 1.408165  | -2.240987 |
| H  | -3.149298 | 2.149610  | -2.075173 |
| C  | -3.440408 | -0.525568 | -0.997211 |
| C  | -3.475273 | -1.678430 | -1.799498 |
| C  | -4.415212 | -0.266257 | -0.018691 |
| C  | -4.525858 | -2.580829 | -1.607528 |
| C  | -5.446875 | -1.195447 | 0.143691  |
| C  | -5.503845 | -2.341479 | -0.645832 |
| H  | -6.315317 | -3.058967 | -0.505594 |
| H  | 2.120613  | -0.435489 | -1.301376 |
| H  | -2.511030 | 0.949494  | -3.226320 |
| H  | -0.945517 | 3.100865  | -2.029370 |
| H  | 0.971060  | 0.976016  | 0.528978  |
| C  | 0.814478  | 3.104087  | 0.377621  |
| C  | 1.750663  | 4.094003  | 0.065960  |
| C  | -0.169357 | 3.389740  | 1.334883  |
| C  | 1.702016  | 5.341374  | 0.693971  |
| H  | 2.532536  | 3.907255  | -0.671765 |
| C  | -0.220119 | 4.630799  | 1.961712  |
| H  | -0.905210 | 2.621803  | 1.589754  |
| C  | 0.718062  | 5.614499  | 1.640496  |
| H  | 2.440976  | 6.102966  | 0.435574  |
| H  | -0.993041 | 4.832638  | 2.706634  |
| H  | 0.680478  | 6.590470  | 2.129154  |
| C  | 1.902113  | 1.482826  | -1.323653 |
| H  | 2.887379  | 1.589112  | -0.831044 |
| H  | 1.848654  | 2.269951  | -2.096199 |
| O  | 1.751113  | 0.246580  | -1.937746 |
| H  | -1.654416 | -1.288009 | 3.746046  |
| H  | 0.986244  | -4.167031 | 3.474573  |
| H  | -0.566270 | -4.953493 | 2.789462  |
| O  | 2.821164  | -1.346953 | -0.192222 |
| C  | 4.108122  | -1.475818 | -0.364930 |
| C  | 4.777182  | -0.916478 | -1.488893 |
| C  | 4.920292  | -2.188977 | 0.557579  |
| C  | 6.149052  | -1.066440 | -1.667172 |
| H  | 4.175796  | -0.369004 | -2.219089 |
| C  | 6.291874  | -2.333409 | 0.366447  |
| H  | 4.444043  | -2.630613 | 1.438885  |
| C  | 6.926653  | -1.775348 | -0.746475 |
| H  | 6.622021  | -0.621629 | -2.548077 |
| H  | 6.877295  | -2.893512 | 1.101940  |
| H  | 8.002320  | -1.892512 | -0.894117 |
| Na | 1.484647  | -2.445468 | 1.154493  |
| H  | -6.214114 | -1.015553 | 0.900660  |
| H  | -4.568838 | -3.488419 | -2.214687 |
| C  | -4.327742 | 0.958995  | 0.851507  |
| H  | -5.265653 | 1.121622  | 1.398270  |
| H  | -3.517629 | 0.850456  | 1.591941  |
| H  | -4.103510 | 1.862442  | 0.265913  |
| C  | -2.409874 | -1.938363 | -2.830953 |
| H  | -2.615164 | -1.387375 | -3.763086 |
| H  | -1.418478 | -1.620506 | -2.477586 |
| H  | -2.364271 | -3.005637 | -3.085514 |

96

Figure\_S2-1\_PA-9b(NaOPh)-pc(1,6major) / electronic energy: -3988.22941216 a.u. / lowest freq: 14.70 cm<sup>-1</sup>

|    |           |           |           |
|----|-----------|-----------|-----------|
| C  | 2.918428  | 0.420905  | -1.662170 |
| H  | 3.868123  | 0.174580  | -1.175603 |
| C  | 2.188022  | -0.844614 | -2.127559 |
| H  | 2.027338  | -0.875028 | -3.214989 |
| C  | 0.823876  | 0.326661  | -0.624633 |
| C  | -0.151144 | -1.693501 | -1.568349 |
| C  | -0.026804 | -2.950967 | -0.952124 |
| C  | -1.280877 | -1.347236 | -2.333127 |
| C  | -1.101555 | -3.840942 | -1.055289 |
| C  | -2.337908 | -2.260666 | -2.394975 |
| C  | -2.254990 | -3.492827 | -1.752097 |
| H  | -3.088052 | -4.197087 | -1.812611 |
| Cu | -0.818412 | 0.904441  | 0.336177  |
| N  | 1.972906  | 0.998307  | -0.699274 |
| N  | 0.901340  | -0.740778 | -1.426914 |
| C  | -2.216186 | 0.586205  | 1.788860  |
| C  | -0.972387 | 0.080499  | 2.255193  |
| H  | 4.094378  | 0.378963  | 1.043728  |
| H  | 2.726526  | -1.756096 | -1.828935 |
| H  | 3.116477  | 1.127725  | -2.482248 |

|    |           |           |           |
|----|-----------|-----------|-----------|
| H  | -2.529509 | 1.565328  | 2.155556  |
| C  | -0.633725 | -1.364420 | 2.343800  |
| C  | -0.052182 | 0.992626  | 2.976440  |
| O  | -1.704131 | -2.142837 | 2.428612  |
| O  | 0.493117  | -1.817149 | 2.389568  |
| O  | 0.990214  | 0.673083  | 3.517777  |
| O  | -0.463559 | 2.260071  | 2.953579  |
| C  | 0.377741  | 3.228555  | 3.567641  |
| H  | 0.481631  | 3.029241  | 4.642698  |
| H  | -0.108644 | 4.195357  | 3.404919  |
| H  | 1.374956  | 3.223405  | 3.105600  |
| C  | -1.489458 | -3.541442 | 2.567148  |
| H  | -0.940096 | -3.936614 | 1.703998  |
| H  | -2.484399 | -3.994977 | 2.618899  |
| H  | -0.926466 | -3.754543 | 3.485980  |
| C  | 2.215438  | 2.242045  | 0.006819  |
| H  | 1.535509  | 2.228388  | 0.874453  |
| C  | 1.877881  | 3.477514  | -0.818660 |
| C  | 1.965906  | 4.744444  | -0.226597 |
| C  | 1.423918  | 3.392075  | -2.138230 |
| C  | 1.626122  | 5.892837  | -0.938084 |
| H  | 2.284018  | 4.840808  | 0.814514  |
| C  | 1.084661  | 4.540517  | -2.854334 |
| H  | 1.297849  | 2.418658  | -2.613928 |
| C  | 1.188465  | 5.795592  | -2.259381 |
| H  | 1.697277  | 6.869249  | -0.454093 |
| H  | 0.726194  | 4.447286  | -3.881703 |
| H  | 0.919198  | 6.694742  | -2.817605 |
| C  | 3.645656  | 2.274462  | 0.575487  |
| H  | 3.781021  | 3.237004  | 1.090486  |
| H  | 4.370734  | 2.269878  | -0.260870 |
| O  | 3.888872  | 1.253377  | 1.487439  |
| C  | -3.219172 | -0.194983 | 1.090178  |
| H  | -2.906697 | -1.145296 | 0.652479  |
| C  | -4.485505 | 0.240841  | 0.923198  |
| H  | -4.775220 | 1.188100  | 1.385332  |
| C  | -5.545493 | -0.457932 | 0.184518  |
| C  | -6.799537 | 0.157406  | 0.042015  |
| C  | -5.357696 | -1.723623 | -0.397067 |
| C  | -7.828579 | -0.462985 | -0.662638 |
| H  | -6.961932 | 1.142975  | 0.485927  |
| C  | -6.384392 | -2.343675 | -1.101996 |
| H  | -4.396894 | -2.232103 | -0.302053 |
| C  | -7.624663 | -1.716471 | -1.239797 |
| H  | -8.794921 | 0.035802  | -0.763944 |
| H  | -6.216088 | -3.326458 | -1.548476 |
| H  | -8.429745 | -2.204997 | -1.792982 |
| C  | -1.694890 | 2.434236  | -0.577680 |
| H  | -0.979370 | 3.170245  | -0.975220 |
| C  | -2.959005 | 2.632897  | -0.788133 |
| C  | -4.261424 | 2.745565  | -0.988778 |
| H  | -4.904106 | 3.287279  | -0.287321 |
| H  | -4.737617 | 2.313290  | -1.875067 |
| O  | 4.009507  | -1.210934 | 0.838969  |
| Na | 2.505731  | -0.700231 | 2.387720  |
| C  | 4.823163  | -1.938583 | 0.133651  |
| C  | 5.881605  | -1.364687 | -0.623012 |
| C  | 4.696463  | -3.352710 | 0.064344  |
| C  | 6.724963  | -2.146158 | -1.408731 |
| H  | 6.034910  | -0.282617 | -0.562024 |
| C  | 5.545666  | -4.122575 | -0.724404 |
| H  | 3.910057  | -3.828057 | 0.655944  |
| C  | 6.565964  | -3.532453 | -1.477362 |
| H  | 7.526287  | -1.661890 | -1.974976 |
| H  | 5.409627  | -5.208005 | -0.751540 |
| H  | 7.228007  | -4.141900 | -2.096111 |
| C  | 1.239449  | -3.361412 | -0.253549 |
| H  | 1.038947  | -4.092819 | 0.540841  |
| H  | 1.928887  | -3.838377 | -0.968948 |
| H  | 1.771922  | -2.510363 | 0.190167  |
| C  | -1.348209 | -0.045644 | -3.084206 |
| H  | -1.594072 | 0.790448  | -2.411991 |
| H  | -0.384686 | 0.189681  | -3.559711 |
| H  | -2.119228 | -0.090813 | -3.864718 |
| H  | -3.233201 | -2.002090 | -2.965481 |
| H  | -1.025566 | -4.824442 | -0.584623 |

96

Figure\_S2-1\_PA-9b(NaPh)-ts(1.6major) / electronic energy: -3988.21834759 a.u. / lowest freq: -441.84 cm<sup>-1</sup>

|   |           |           |           |
|---|-----------|-----------|-----------|
| C | 2.922414  | 0.429802  | -1.695778 |
| H | 3.860551  | 0.219443  | -1.172217 |
| C | 2.236525  | -0.867157 | -2.138580 |
| H | 2.104802  | -0.937626 | -3.228128 |
| C | 0.803687  | 0.313433  | -0.707976 |
| C | -0.086863 | -1.763320 | -1.622590 |
| C | 0.049225  | -2.992460 | -0.954587 |
| C | -1.184815 | -1.485804 | -2.456696 |
| C | -0.982581 | -3.928515 | -1.084987 |
| C | -2.190373 | -2.451526 | -2.562200 |
| C | -2.098720 | -3.657111 | -1.870965 |

|    |           |           |           |
|----|-----------|-----------|-----------|
| H  | -2.895943 | -4.398509 | -1.959475 |
| Cu | -0.823872 | 0.859921  | 0.284910  |
| N  | 1.936156  | 1.015424  | -0.780295 |
| N  | 0.930242  | -0.774923 | -1.474145 |
| C  | -2.204880 | 0.628600  | 1.847805  |
| C  | -0.921242 | 0.176567  | 2.329538  |
| H  | 4.077180  | 0.564705  | 0.992854  |
| H  | 2.790138  | -1.753458 | -1.795804 |
| H  | 3.132125  | 1.111568  | -2.533749 |
| H  | -2.507817 | 1.623409  | 2.184343  |
| C  | -0.546841 | -1.239987 | 2.458831  |
| C  | -0.031665 | 1.156508  | 2.958134  |
| O  | -1.590857 | -2.066677 | 2.386390  |
| O  | 0.580755  | -1.669343 | 2.644655  |
| O  | 1.032929  | 0.932331  | 3.514633  |
| O  | -0.483842 | 2.417118  | 2.845236  |
| C  | 0.324283  | 3.441986  | 3.400822  |
| H  | 0.421573  | 3.320535  | 4.488542  |
| H  | -0.180740 | 4.385652  | 3.169340  |
| H  | 1.329525  | 3.432000  | 2.955675  |
| C  | -1.345345 | -3.453132 | 2.553836  |
| H  | -0.637956 | -3.820614 | 1.800685  |
| H  | -2.314315 | -3.948155 | 2.429703  |
| H  | -0.941082 | -3.657638 | 3.555114  |
| C  | 2.126148  | 2.287406  | -0.107837 |
| H  | 1.467591  | 2.261116  | 0.775679  |
| C  | 1.708036  | 3.483835  | -0.951465 |
| C  | 1.606399  | 4.742155  | -0.343838 |
| C  | 1.369123  | 3.369512  | -2.302922 |
| C  | 1.188186  | 5.855869  | -1.068067 |
| H  | 1.835467  | 4.854126  | 0.719168  |
| C  | 0.953179  | 4.484373  | -3.032581 |
| H  | 1.395613  | 2.396899  | -2.795903 |
| C  | 0.863325  | 5.731873  | -2.419552 |
| H  | 1.106210  | 6.824933  | -0.571308 |
| H  | 0.690386  | 4.369611  | -4.086295 |
| H  | 0.532116  | 6.603217  | -2.988264 |
| C  | 3.561746  | 2.419386  | 0.431664  |
| H  | 3.650166  | 3.413057  | 0.896434  |
| H  | 4.272621  | 2.414195  | -0.417198 |
| O  | 3.875870  | 1.462009  | 1.388460  |
| C  | -3.155308 | -0.100368 | 1.114443  |
| H  | -2.888659 | -1.086867 | 0.731842  |
| C  | -4.415233 | 0.429156  | 0.820228  |
| H  | -4.778472 | 1.214346  | 1.486097  |
| C  | -5.472465 | -0.394296 | 0.191487  |
| C  | -6.822089 | -0.124418 | 0.457978  |
| C  | -5.162555 | -1.443195 | -0.688304 |
| C  | -7.832602 | -0.887518 | -0.125885 |
| H  | -7.082654 | 0.692768  | 1.136063  |
| C  | -6.170352 | -2.204162 | -1.272758 |
| H  | -4.120020 | -1.657003 | -0.931701 |
| C  | -7.511333 | -1.931460 | -0.993155 |
| H  | -8.878393 | -0.665085 | 0.097958  |
| H  | -5.905855 | -3.013860 | -1.957192 |
| H  | -8.302268 | -2.527931 | -1.452967 |
| C  | -1.737108 | 2.375541  | -0.741870 |
| H  | -0.974778 | 3.010437  | -1.195899 |
| C  | -2.998603 | 2.344286  | -0.821026 |
| C  | -4.314415 | 2.014075  | -0.751116 |
| H  | -5.004423 | 2.673653  | -0.218062 |
| H  | -4.747561 | 1.453889  | -1.585663 |
| O  | 4.000986  | -1.037809 | 0.898803  |
| Na | 2.528816  | -0.462660 | 2.461997  |
| C  | 4.800380  | -1.840980 | 0.264080  |
| C  | 5.836089  | -1.361067 | -0.584407 |
| C  | 4.679956  | -3.253978 | 0.369114  |
| C  | 6.660905  | -2.230265 | -1.294378 |
| H  | 5.986997  | -0.279601 | -0.659401 |
| C  | 5.511410  | -4.111757 | -0.343643 |
| H  | 3.909763  | -3.654591 | 1.033348  |
| C  | 6.507407  | -3.615023 | -1.191084 |
| H  | 7.442598  | -1.816898 | -1.938860 |
| H  | 5.380576  | -5.192608 | -0.234208 |
| H  | 7.155322  | -4.292610 | -1.751099 |
| C  | 1.292224  | -3.319854 | -0.175094 |
| H  | 1.100874  | -4.089163 | 0.584691  |
| H  | 2.068210  | -3.721131 | -0.846549 |
| H  | 1.721990  | -2.439705 | 0.321344  |
| C  | -1.272830 | -0.195750 | -3.225584 |
| H  | -1.548916 | 0.639870  | -2.565194 |
| H  | -0.308796 | 0.061131  | -3.688869 |
| H  | -2.030718 | -0.266451 | -4.017047 |
| H  | -3.052668 | -2.254308 | -3.203920 |
| H  | -0.901157 | -4.887259 | -0.566807 |

96

Figure\_S2-1\_PA-9b(NaOPh)-prod(1,6major) / electronic energy: -3988.26800024 a.u. / lowest freq: 17.09 cm-1

|   |          |           |           |
|---|----------|-----------|-----------|
| C | 2.949058 | 0.002568  | -1.826749 |
| H | 3.857467 | -0.316183 | -1.302978 |

|    |           |           |           |
|----|-----------|-----------|-----------|
| C  | 2.113819  | -1.204432 | -2.276397 |
| H  | 2.059629  | -1.312994 | -3.368661 |
| C  | 0.809114  | 0.174009  | -0.912652 |
| C  | -0.395982 | -1.613777 | -2.029143 |
| C  | -0.675263 | -2.808601 | -1.349778 |
| C  | -1.258946 | -1.090977 | -3.007862 |
| C  | -1.849308 | -3.494268 | -1.679089 |
| C  | -2.422785 | -1.805035 | -3.307951 |
| C  | -2.712288 | -3.000603 | -2.653521 |
| H  | -3.626708 | -3.545544 | -2.898136 |
| Cu | -0.680895 | 0.744959  | 0.178418  |
| N  | 2.034962  | 0.698932  | -0.914936 |
| N  | 0.793108  | -0.890430 | -1.717944 |
| C  | -1.866432 | 0.979191  | 1.872200  |
| C  | -0.618123 | 0.615525  | 2.546984  |
| H  | 4.104879  | 0.235568  | 0.868922  |
| H  | 2.500918  | -2.142790 | -1.848309 |
| H  | 3.240572  | 0.655952  | -2.664581 |
| H  | -2.143585 | 2.030708  | 1.995847  |
| C  | -0.248671 | -0.747220 | 2.881128  |
| C  | 0.274006  | 1.681310  | 2.952570  |
| O  | -1.219305 | -1.641996 | 2.614626  |
| O  | 0.808775  | -1.128491 | 3.371153  |
| O  | 1.388769  | 1.570884  | 3.454911  |
| O  | -0.214922 | 2.916209  | 2.690618  |
| C  | 0.587551  | 4.016807  | 3.071097  |
| H  | 0.638224  | 4.111782  | 4.165882  |
| H  | 0.111737  | 4.906464  | 2.643110  |
| H  | 1.612341  | 3.913366  | 2.686997  |
| C  | -0.991287 | -2.981240 | 3.012911  |
| H  | -0.041347 | -3.362593 | 2.615619  |
| H  | -1.828164 | -3.563540 | 2.610519  |
| H  | -0.972580 | -3.065990 | 4.109426  |
| C  | 2.332885  | 1.973165  | -0.281201 |
| H  | 1.756983  | 1.993099  | 0.658460  |
| C  | 1.882773  | 3.160949  | -1.122577 |
| C  | 1.781049  | 4.421100  | -0.519696 |
| C  | 1.531583  | 3.039805  | -2.469976 |
| C  | 1.339400  | 5.528646  | -1.240866 |
| H  | 2.030924  | 4.538034  | 0.537358  |
| C  | 1.096596  | 4.147669  | -3.198664 |
| H  | 1.568449  | 2.068236  | -2.963331 |
| C  | 0.997003  | 5.395989  | -2.587941 |
| H  | 1.255457  | 6.498512  | -0.746183 |
| H  | 0.824035  | 4.026876  | -4.249129 |
| H  | 0.647277  | 6.261268  | -3.154549 |
| C  | 3.812016  | 2.079503  | 0.123335  |
| H  | 3.974881  | 3.104199  | 0.489979  |
| H  | 4.442864  | 1.973771  | -0.781511 |
| O  | 4.181711  | 1.200852  | 1.132543  |
| C  | -2.676094 | 0.232443  | 1.051128  |
| H  | -2.530008 | -0.845721 | 0.957803  |
| C  | -3.908257 | 0.825249  | 0.397273  |
| H  | -4.223706 | 1.703886  | 0.981369  |
| C  | -5.059989 | -0.161420 | 0.369918  |
| C  | -6.288445 | 0.147160  | 0.960987  |
| C  | -4.913741 | -1.403506 | -0.261509 |
| C  | -7.346524 | -0.762925 | 0.926598  |
| H  | -6.419550 | 1.111809  | 1.458641  |
| C  | -5.967233 | -2.313774 | -0.298956 |
| H  | -3.963024 | -1.667510 | -0.731776 |
| C  | -7.189351 | -1.996525 | 0.296697  |
| H  | -8.298008 | -0.505976 | 1.397673  |
| H  | -5.831640 | -3.277930 | -0.794790 |
| H  | -8.015239 | -2.710773 | 0.271039  |
| C  | -1.679537 | 3.176390  | -1.048667 |
| H  | -0.899622 | 3.919133  | -1.051348 |
| C  | -2.565609 | 2.349108  | -1.071782 |
| C  | -3.617237 | 1.333729  | -1.043149 |
| H  | -4.539975 | 1.749266  | -1.478249 |
| H  | -3.314276 | 0.486322  | -1.681412 |
| O  | 3.685371  | -1.278610 | 1.095283  |
| Na | 2.805606  | -0.133025 | 2.824130  |
| C  | 4.124129  | -2.348731 | 0.509001  |
| C  | 5.215467  | -2.318319 | -0.403970 |
| C  | 3.530359  | -3.621687 | 0.732012  |
| C  | 5.643448  | -3.463687 | -1.070423 |
| H  | 5.726352  | -1.363979 | -0.566053 |
| C  | 3.968854  | -4.759187 | 0.062018  |
| H  | 2.703961  | -3.681273 | 1.445492  |
| C  | 5.023657  | -4.697429 | -0.854947 |
| H  | 6.481505  | -3.392120 | -1.770435 |
| H  | 3.475904  | -5.716460 | 0.257501  |
| H  | 5.361924  | -5.593237 | -1.379981 |
| C  | 0.266927  | -3.326269 | -0.302446 |
| H  | -0.197049 | -4.131056 | 0.282227  |
| H  | 1.186883  | -3.730185 | -0.751971 |
| H  | 0.581136  | -2.526053 | 0.384119  |
| C  | -0.942948 | 0.211020  | -3.693584 |

|   |           |           |           |
|---|-----------|-----------|-----------|
| H | -0.947626 | 1.044784  | -2.973877 |
| H | 0.055388  | 0.188745  | -4.157174 |
| H | -1.679614 | 0.431304  | -4.477124 |
| H | -3.109772 | -1.417129 | -4.063931 |
| H | -2.087484 | -4.425198 | -1.159149 |

96

Figure\_S2-1\_PA-9d(NaO<sub>Ph</sub>)-prod(1.6minor) / electronic energy: -3988.26945033 a.u. / lowest freq: 17.61 cm<sup>-1</sup>

|    |           |           |           |
|----|-----------|-----------|-----------|
| C  | 1.821528  | -2.470637 | 1.900618  |
| H  | 2.286359  | -3.265836 | 1.302161  |
| C  | 2.794874  | -1.311499 | 2.147059  |
| H  | 2.987856  | -1.132684 | 3.214913  |
| C  | 0.947579  | -0.523059 | 0.956204  |
| C  | 2.658570  | 1.127020  | 1.537962  |
| C  | 3.992752  | 1.305530  | 1.905923  |
| C  | 1.902423  | 2.245703  | 1.156893  |
| C  | 4.586204  | 2.573245  | 1.860451  |
| C  | 2.469592  | 3.516299  | 1.117404  |
| C  | 3.820075  | 3.667883  | 1.461134  |
| H  | 4.276837  | 4.660805  | 1.422465  |
| Cu | -0.298913 | 0.516049  | -0.078056 |
| N  | 0.750919  | -1.822363 | 1.143887  |
| N  | 2.095213  | -0.163445 | 1.557070  |
| C  | -1.643425 | 1.410087  | -1.323096 |
| C  | -0.745629 | 0.767106  | -2.293712 |
| H  | 1.189978  | -3.196476 | -1.156696 |
| H  | 3.753318  | -1.477206 | 1.634590  |
| H  | 1.435569  | -2.913207 | 2.831829  |
| H  | -1.559246 | 2.501229  | -1.293365 |
| C  | 0.387877  | 1.535541  | -2.783139 |
| C  | -0.965255 | -0.555931 | -2.851481 |
| O  | 0.426216  | 2.794361  | -2.295074 |
| O  | 1.284077  | 1.147634  | -3.524946 |
| O  | -0.354349 | -1.077466 | -3.775651 |
| O  | -1.962019 | -1.237494 | -2.249792 |
| C  | -2.172952 | -2.573185 | -2.683550 |
| H  | -2.316072 | -2.621677 | -3.771131 |
| H  | -3.083298 | -2.914558 | -2.176856 |
| H  | -1.316562 | -3.204727 | -2.398834 |
| C  | 1.570856  | 3.566654  | -2.607515 |
| H  | 2.466875  | 3.146809  | -2.125448 |
| H  | 1.378782  | 4.570031  | -2.212577 |
| H  | 1.737148  | 3.616396  | -3.692152 |
| C  | -0.436092 | -2.501859 | 0.647847  |
| H  | -0.741692 | -1.954765 | -0.258018 |
| C  | -1.599425 | -2.433860 | 1.628522  |
| C  | -2.880064 | -2.793542 | 1.187213  |
| C  | -1.450281 | -1.993325 | 2.945621  |
| C  | -3.977169 | -2.733982 | 2.043035  |
| H  | -3.024504 | -3.117698 | 0.153832  |
| C  | -2.547370 | -1.931569 | 3.806776  |
| H  | -0.473698 | -1.669304 | 3.307991  |
| C  | -3.813599 | -2.303854 | 3.361182  |
| H  | -4.965931 | -3.018954 | 1.676670  |
| H  | -2.408179 | -1.577984 | 4.830504  |
| H  | -4.671982 | -2.251514 | 4.034037  |
| C  | -0.124805 | -3.932920 | 0.189866  |
| H  | -1.091516 | -4.436565 | 0.022039  |
| H  | 0.351594  | -4.477346 | 1.031684  |
| O  | 0.624487  | -4.007882 | -0.976320 |
| C  | -2.486799 | 0.842984  | -0.398084 |
| H  | -2.703614 | -0.227909 | -0.426791 |
| C  | -3.372192 | 1.658813  | 0.512344  |
| H  | -3.091259 | 2.719941  | 0.424580  |
| C  | -4.820150 | 1.519388  | 0.069515  |
| C  | -5.493517 | 2.595585  | -0.516215 |
| C  | -5.499075 | 0.301661  | 0.210350  |
| C  | -6.813428 | 2.463282  | -0.950178 |
| H  | -4.977286 | 3.551823  | -0.637031 |
| C  | -6.817037 | 0.166451  | -0.220745 |
| H  | -4.992223 | -0.556398 | 0.659432  |
| C  | -7.479991 | 1.247810  | -0.803342 |
| H  | -7.321734 | 3.316423  | -1.405298 |
| H  | -7.329446 | -0.791054 | -0.101969 |
| H  | -8.512701 | 1.141410  | -1.142709 |
| C  | -0.886130 | 1.982409  | 3.082735  |
| H  | 0.052103  | 2.276288  | 3.517969  |
| C  | -1.933274 | 1.638379  | 2.581902  |
| C  | -3.213404 | 1.246868  | 1.995186  |
| H  | -3.327060 | 0.155046  | 2.096486  |
| H  | -4.025232 | 1.701901  | 2.585074  |
| O  | 2.075453  | -1.971902 | -1.677543 |
| Na | 1.897311  | -1.049740 | -3.711970 |
| C  | 3.279301  | -1.850287 | -1.202572 |
| C  | 3.928747  | -0.586350 | -1.140573 |
| C  | 4.023407  | -2.967094 | -0.727235 |
| C  | 5.220291  | -0.455002 | -0.640415 |
| H  | 3.372127  | 0.294751  | -1.476530 |
| C  | 5.311130  | -2.819832 | -0.220563 |
| H  | 3.548737  | -3.951523 | -0.772940 |

|   |          |           |           |
|---|----------|-----------|-----------|
| C | 5.928051 | -1.564830 | -0.168002 |
| H | 5.677482 | 0.537899  | -0.601664 |
| H | 5.846944 | -3.703358 | 0.139553  |
| H | 6.938953 | -1.454709 | 0.230334  |
| C | 1.626825 | 4.712109  | 0.758290  |
| H | 0.699044 | 4.411347  | 0.251900  |
| H | 1.346906 | 5.274083  | 1.663794  |
| H | 2.174818 | 5.404387  | 0.102528  |
| C | 6.038518 | 2.724772  | 2.231380  |
| H | 6.205246 | 2.463127  | 3.287811  |
| H | 6.669501 | 2.054247  | 1.627809  |
| H | 6.389587 | 3.754210  | 2.077578  |
| H | 0.841666 | 2.139449  | 0.922503  |
| H | 4.604792 | 0.450451  | 2.193158  |

96

Figure\_S2-1\_PA-9d(NaOPh)-ts(1,6minor) / electronic energy: -3988.21792967 a.u. / lowest freq: -450.44 cm<sup>-1</sup>

|    |           |           |           |
|----|-----------|-----------|-----------|
| C  | 2.947852  | -1.853253 | 1.292620  |
| H  | 3.636009  | -2.242294 | 0.530857  |
| C  | 3.291331  | -0.408970 | 1.667599  |
| H  | 3.492434  | -0.274941 | 2.740739  |
| C  | 1.121921  | -0.476297 | 0.781732  |
| C  | 1.983263  | 1.727379  | 1.434222  |
| C  | 3.147647  | 2.496801  | 1.459914  |
| C  | 0.740052  | 2.361285  | 1.548608  |
| C  | 3.078034  | 3.892791  | 1.552925  |
| C  | 0.648625  | 3.748597  | 1.620576  |
| C  | 1.827043  | 4.506250  | 1.621827  |
| H  | 1.764113  | 5.596357  | 1.686889  |
| Cu | -0.755762 | 0.011850  | 0.301166  |
| N  | 1.591961  | -1.721432 | 0.749736  |
| N  | 2.072511  | 0.323670  | 1.296305  |
| C  | -2.059354 | 1.038188  | -1.066307 |
| C  | -0.953404 | 0.439594  | -1.774156 |
| H  | 2.968430  | -2.887236 | -1.454515 |
| H  | 4.157379  | -0.048443 | 1.098707  |
| H  | 2.962229  | -2.535511 | 2.155470  |
| H  | -1.835292 | 2.036698  | -0.674990 |
| C  | 0.240514  | 1.251315  | -2.060058 |
| C  | -1.025600 | -0.884182 | -2.404348 |
| O  | 0.109489  | 2.526422  | -1.682795 |
| O  | 1.278087  | 0.851598  | -2.563347 |
| O  | -0.268341 | -1.330817 | -3.249899 |
| O  | -2.023718 | -1.641971 | -1.926776 |
| C  | -2.160949 | -2.945326 | -2.472590 |
| H  | -2.346251 | -2.899492 | -3.554395 |
| H  | -3.015918 | -3.398966 | -1.960268 |
| H  | -1.252544 | -3.539319 | -2.295974 |
| C  | 1.264349  | 3.348333  | -1.771322 |
| H  | 2.062027  | 2.967890  | -1.116630 |
| H  | 0.953987  | 4.342508  | -1.432833 |
| H  | 1.632659  | 3.395868  | -2.805279 |
| C  | 0.782273  | -2.850435 | 0.323874  |
| H  | 0.094406  | -2.459963 | -0.442337 |
| C  | -0.073497 | -3.427600 | 1.442287  |
| C  | -1.147768 | -4.259261 | 1.103237  |
| C  | 0.148552  | -3.141701 | 2.791753  |
| C  | -1.976139 | -4.796735 | 2.084966  |
| H  | -1.350812 | -4.476581 | 0.051234  |
| C  | -0.677987 | -3.680511 | 3.778918  |
| H  | 0.956848  | -2.470961 | 3.087892  |
| C  | -1.741573 | -4.510077 | 3.430303  |
| H  | -2.813655 | -5.435884 | 1.797175  |
| H  | -0.490606 | -3.442499 | 4.828196  |
| H  | -2.392400 | -4.925014 | 4.202740  |
| C  | 1.633016  | -3.921768 | -0.378528 |
| H  | 0.968934  | -4.771779 | -0.597040 |
| H  | 2.397865  | -4.302802 | 0.324972  |
| O  | 2.185070  | -3.486558 | -1.577706 |
| C  | -3.411297 | 0.676238  | -1.013817 |
| H  | -3.740212 | -0.238365 | -1.504379 |
| C  | -4.309035 | 1.410480  | -0.240619 |
| H  | -3.959336 | 2.388635  | 0.103806  |
| C  | -5.779080 | 1.312363  | -0.402577 |
| C  | -6.581030 | 2.409017  | -0.054926 |
| C  | -6.408837 | 0.155625  | -0.888536 |
| C  | -7.966706 | 2.360356  | -0.199429 |
| H  | -6.108584 | 3.315786  | 0.332444  |
| C  | -7.792624 | 0.105451  | -1.032280 |
| H  | -5.813989 | -0.722460 | -1.149303 |
| C  | -8.578608 | 1.207940  | -0.690469 |
| H  | -8.570623 | 3.228776  | 0.073451  |
| H  | -8.262977 | -0.803707 | -1.413509 |
| H  | -9.663826 | 1.165699  | -0.805359 |
| C  | -0.700495 | 4.415791  | 1.671096  |
| H  | -0.952933 | 4.846097  | 0.688441  |
| H  | -1.491391 | 3.699156  | 1.933822  |
| H  | -0.717897 | 5.236896  | 2.402316  |
| C  | 4.349549  | 4.700826  | 1.543868  |
| H  | 4.153328  | 5.766504  | 1.723904  |

|    |           |           |           |
|----|-----------|-----------|-----------|
| H  | 5.051977  | 4.344864  | 2.312389  |
| H  | 4.861295  | 4.609640  | 0.572872  |
| H  | 4.125428  | 2.022775  | 1.374119  |
| H  | -0.175029 | 1.770787  | 1.607872  |
| C  | -1.787100 | -0.179647 | 2.036798  |
| C  | -1.174648 | -0.659549 | 2.801312  |
| C  | -2.993111 | 0.208894  | 2.062094  |
| C  | -4.257774 | 0.645955  | 1.828583  |
| H  | -5.037649 | -0.107471 | 1.686176  |
| H  | -4.587903 | 1.585159  | 2.282960  |
| O  | 3.878431  | -1.599328 | -1.883493 |
| Na | 2.006085  | -1.285180 | -3.033121 |
| C  | 4.731029  | -0.761716 | -1.381871 |
| C  | 4.568302  | 0.645878  | -1.526398 |
| C  | 5.865781  | -1.190932 | -0.638046 |
| C  | 5.465525  | 1.543087  | -0.957652 |
| H  | 3.691963  | 1.009661  | -2.070241 |
| C  | 6.747784  | -0.279936 | -0.062416 |
| H  | 6.023561  | -2.266959 | -0.519254 |
| C  | 6.561258  | 1.098359  | -0.209630 |
| H  | 5.296666  | 2.616652  | -1.086971 |
| H  | 7.601364  | -0.653082 | 0.511686  |
| H  | 7.257897  | 1.809077  | 0.240241  |

96

Figure\_S2-1\_PA-9d(Na0Ph)-pc(1,6minor) / electronic energy: -3988.23046303 a.u. / lowest freq: 12.68 cm<sup>-1</sup>

|    |           |           |           |
|----|-----------|-----------|-----------|
| C  | 2.268623  | -1.899566 | 1.677184  |
| H  | 2.824407  | -2.651307 | 1.103619  |
| C  | 3.051005  | -0.589999 | 1.790238  |
| H  | 3.355654  | -0.358139 | 2.820466  |
| C  | 0.962742  | -0.160137 | 0.827340  |
| C  | 2.368685  | 1.787113  | 1.311018  |
| C  | 3.690929  | 2.218297  | 1.167526  |
| C  | 1.346753  | 2.727572  | 1.466236  |
| C  | 3.995427  | 3.583091  | 1.156787  |
| C  | 1.629416  | 4.094280  | 1.450716  |
| C  | 2.956128  | 4.508842  | 1.291533  |
| H  | 3.184934  | 5.578361  | 1.274914  |
| Cu | -0.740384 | 0.704546  | 0.248976  |
| N  | 1.053907  | -1.477155 | 0.974348  |
| N  | 2.080682  | 0.404946  | 1.314478  |
| C  | -2.000759 | 1.414301  | -1.198462 |
| C  | -0.735253 | 1.084199  | -1.774099 |
| H  | 2.092576  | -2.846280 | -1.098749 |
| H  | 3.945082  | -0.604093 | 1.151622  |
| H  | 2.020899  | -2.324084 | 2.661648  |
| H  | -2.121451 | 2.471287  | -0.948040 |
| C  | 0.280313  | 2.170808  | -1.912757 |
| C  | -0.431596 | -0.168723 | -2.513327 |
| O  | -0.230426 | 3.383178  | -1.726735 |
| O  | 1.460660  | 2.012735  | -2.159249 |
| O  | 0.571197  | -0.370273 | -3.170105 |
| O  | -1.373137 | -1.102556 | -2.401014 |
| C  | -1.139285 | -2.347877 | -3.063310 |
| H  | -1.021173 | -2.190093 | -4.143370 |
| H  | -2.029435 | -2.954712 | -2.865327 |
| H  | -0.239914 | -2.830830 | -2.652998 |
| C  | 0.664455  | 4.484411  | -1.836365 |
| H  | 1.512935  | 4.363120  | -1.150330 |
| H  | 0.083003  | 5.372872  | -1.569665 |
| H  | 1.038067  | 4.571864  | -2.865944 |
| C  | 0.021595  | -2.381162 | 0.475083  |
| H  | -0.387931 | -1.894621 | -0.418326 |
| C  | -1.141510 | -2.561726 | 1.432110  |
| C  | -2.441004 | -2.472123 | 0.921596  |
| C  | -0.972653 | -2.793123 | 2.799850  |
| C  | -3.550211 | -2.599108 | 1.753424  |
| H  | -2.582078 | -2.269055 | -0.143296 |
| C  | -2.080833 | -2.917292 | 3.638095  |
| H  | 0.028713  | -2.865210 | 3.228462  |
| C  | -3.371686 | -2.818276 | 3.118834  |
| H  | -4.555280 | -2.504059 | 1.335645  |
| H  | -1.932953 | -3.088425 | 4.706634  |
| H  | -4.236762 | -2.904849 | 3.779806  |
| C  | 0.621716  | -3.700776 | -0.023153 |
| H  | -0.223497 | -4.366651 | -0.260109 |
| H  | 1.175088  | -4.191157 | 0.804339  |
| O  | 1.390190  | -3.557161 | -1.173038 |
| C  | -3.238709 | 0.660057  | -1.230254 |
| H  | -3.195103 | -0.378540 | -1.548517 |
| C  | -4.410187 | 1.203500  | -0.838371 |
| H  | -4.429884 | 2.258723  | -0.549698 |
| C  | -5.703920 | 0.508437  | -0.784684 |
| C  | -6.863411 | 1.246399  | -0.498918 |
| C  | -5.834190 | -0.876348 | -0.988301 |
| C  | -8.109147 | 0.628167  | -0.418007 |
| H  | -6.780106 | 2.323165  | -0.330073 |
| C  | -7.077635 | -1.495501 | -0.907183 |
| H  | -4.951958 | -1.483136 | -1.202425 |
| C  | -8.221779 | -0.746942 | -0.620808 |

|    |           |           |           |
|----|-----------|-----------|-----------|
| H  | -8.996887 | 1.222914  | -0.191418 |
| H  | -7.156013 | -2.573511 | -1.064881 |
| H  | -9.195869 | -1.235913 | -0.553043 |
| C  | -1.740749 | 0.915690  | 1.944395  |
| H  | -1.116159 | 0.831671  | 2.846947  |
| C  | -3.021751 | 1.032632  | 2.109470  |
| C  | -4.337139 | 1.115540  | 2.200561  |
| H  | -4.953718 | 0.211083  | 2.223090  |
| H  | -4.850866 | 2.080343  | 2.258186  |
| O  | 3.274684  | -1.721869 | -1.218464 |
| Na | 2.675572  | 0.074441  | -2.346865 |
| C  | 4.473073  | -2.104930 | -0.890542 |
| C  | 5.555293  | -1.185201 | -0.800313 |
| C  | 4.769447  | -3.459100 | -0.569697 |
| C  | 6.829678  | -1.591846 | -0.413633 |
| H  | 5.365422  | -0.133280 | -1.039708 |
| C  | 6.047940  | -3.851161 | -0.184127 |
| H  | 3.959262  | -4.189857 | -0.645924 |
| C  | 7.094050  | -2.927281 | -0.098016 |
| H  | 7.631795  | -0.849965 | -0.356401 |
| H  | 6.233187  | -4.903607 | 0.050976  |
| H  | 8.094825  | -3.242244 | 0.204992  |
| C  | 0.516765  | 5.092770  | 1.634263  |
| H  | -0.423118 | 4.722163  | 1.200340  |
| H  | 0.334254  | 5.278090  | 2.704776  |
| H  | 0.760446  | 6.057599  | 1.167839  |
| C  | 5.424433  | 4.041880  | 1.025684  |
| H  | 5.895538  | 4.127914  | 2.018108  |
| H  | 6.024212  | 3.332669  | 0.437928  |
| H  | 5.486796  | 5.028585  | 0.545789  |
| H  | 0.319143  | 2.393807  | 1.622303  |
| H  | 4.495940  | 1.491000  | 1.046379  |

64

Figure\_S2-1\_9d(NaOPh)-Cu-allenyl / electronic energy: -3146.25617778 a.u. / lowest freq: 11.92 cm<sup>-1</sup>

|    |           |           |           |
|----|-----------|-----------|-----------|
| Cu | -0.619467 | -0.796156 | 0.827096  |
| C  | -0.346515 | -2.401130 | 1.871679  |
| C  | -0.937222 | 0.741398  | -0.321533 |
| N  | -2.143873 | 1.194277  | -0.727784 |
| N  | 0.001999  | 1.491143  | -0.883402 |
| C  | 1.428889  | 1.329861  | -0.605320 |
| C  | 0.000505  | -3.552073 | 1.370637  |
| C  | 0.379012  | -4.681143 | 0.783804  |
| C  | -0.538280 | 2.590848  | -1.682850 |
| H  | -0.064878 | 2.614677  | -2.671898 |
| C  | -2.024791 | 2.234507  | -1.754997 |
| H  | -2.687930 | 3.081346  | -1.533017 |
| C  | -3.384438 | 0.644678  | -0.341043 |
| C  | -4.475496 | 0.689404  | -1.214462 |
| C  | -3.536012 | 0.067039  | 0.924065  |
| C  | -5.702527 | 0.127497  | -0.846977 |
| C  | -4.745649 | -0.518589 | 1.301216  |
| C  | -5.819800 | -0.481859 | 0.406051  |
| H  | -6.774855 | -0.927927 | 0.697213  |
| H  | 1.928082  | -0.165857 | -2.634416 |
| H  | -2.295340 | 1.829362  | -2.742745 |
| H  | -0.361921 | 3.553497  | -1.177043 |
| H  | 1.548128  | 0.269518  | -0.343982 |
| C  | 1.868628  | 2.158545  | 0.586139  |
| C  | 2.053601  | 3.544278  | 0.504275  |
| C  | 2.081183  | 1.523956  | 1.815389  |
| C  | 2.431048  | 4.278172  | 1.628804  |
| H  | 1.910466  | 4.065296  | -0.445429 |
| C  | 2.459838  | 2.254661  | 2.940604  |
| H  | 1.953127  | 0.439958  | 1.885623  |
| C  | 2.633553  | 3.635791  | 2.850098  |
| H  | 2.572759  | 5.358128  | 1.547429  |
| H  | 2.623645  | 1.742288  | 3.891151  |
| H  | 2.931610  | 4.210602  | 3.729810  |
| C  | 2.268177  | 1.568157  | -1.865892 |
| H  | 3.322384  | 1.385089  | -1.581130 |
| H  | 2.205771  | 2.626217  | -2.173769 |
| O  | 1.853004  | 0.780671  | -2.934328 |
| H  | -0.497865 | -2.385581 | 2.963745  |
| H  | 1.440706  | -4.937140 | 0.691804  |
| H  | -0.352724 | -5.417789 | 0.434912  |
| O  | 2.095699  | -1.595484 | -1.830360 |
| C  | 3.222727  | -1.564585 | -1.170414 |
| C  | 4.447353  | -1.226071 | -1.804986 |
| C  | 3.281741  | -1.828571 | 0.224015  |
| C  | 5.640423  | -1.157639 | -1.091733 |
| H  | 4.422841  | -1.005951 | -2.875978 |
| C  | 4.482514  | -1.757915 | 0.926085  |
| H  | 2.350068  | -2.074064 | 0.744595  |
| C  | 5.675802  | -1.422792 | 0.280923  |
| H  | 6.562662  | -0.890149 | -1.616402 |
| H  | 4.483811  | -1.961209 | 2.001267  |
| H  | 6.614856  | -1.365732 | 0.835649  |
| Na | 0.382018  | -2.891610 | -1.448261 |
| C  | -4.878061 | -1.148536 | 2.663108  |



|   |           |           |           |
|---|-----------|-----------|-----------|
| H | -4.770153 | -0.392767 | 3.456561  |
| H | -5.854279 | -1.635792 | 2.789687  |
| H | -4.092521 | -1.902634 | 2.823354  |
| C | -6.862411 | 0.151859  | -1.808539 |
| H | -7.814286 | -0.041059 | -1.295092 |
| H | -6.937309 | 1.122263  | -2.320462 |
| H | -6.741086 | -0.619441 | -2.586003 |
| H | -2.706191 | 0.090239  | 1.634257  |
| H | -4.376491 | 1.152925  | -2.197690 |

64

Figure\_S2-1\_9b(NaOPh)-Cu-allenyl / electronic energy: -3146.25183127 a.u. / lowest freq: 14.48 cm<sup>-1</sup>

|    |           |           |           |
|----|-----------|-----------|-----------|
| Cu | -1.159994 | -0.590393 | 1.249005  |
| C  | -1.116318 | -1.661983 | 2.858319  |
| C  | -1.308620 | 0.472985  | -0.363800 |
| N  | -2.371853 | 0.399588  | -1.177453 |
| N  | -0.493582 | 1.418385  | -0.819509 |
| C  | 0.814281  | 1.723428  | -0.265472 |
| C  | -0.596166 | -2.849269 | 2.995372  |
| C  | -0.025278 | -4.043820 | 3.070053  |
| C  | -0.945998 | 2.002813  | -2.084278 |
| H  | -0.272077 | 1.686950  | -2.894296 |
| C  | -2.351352 | 1.408165  | -2.240987 |
| H  | -3.149298 | 2.149610  | -2.075173 |
| C  | -3.440408 | -0.525568 | -0.997211 |
| C  | -3.475273 | -1.678430 | -1.799498 |
| C  | -4.415212 | -0.266257 | -0.018691 |
| C  | -4.525858 | -2.580829 | -1.607528 |
| C  | -5.446875 | -1.195447 | 0.143691  |
| C  | -5.503845 | -2.341479 | -0.645832 |
| H  | -6.315317 | -3.058967 | -0.505594 |
| H  | -2.120613 | -0.435489 | -1.301376 |
| H  | -2.511030 | 0.949494  | -3.226320 |
| H  | -0.945517 | 3.100865  | -2.029370 |
| H  | 0.971060  | 0.976016  | 0.528978  |
| C  | 0.814478  | 3.104087  | 0.377621  |
| C  | 1.750663  | 4.094003  | 0.065960  |
| C  | -0.169357 | 3.389740  | 1.334883  |
| C  | 1.702016  | 5.341374  | 0.693971  |
| H  | 2.532536  | 3.907255  | -0.671765 |
| C  | -0.220119 | 4.630799  | 1.961712  |
| H  | -0.905210 | 2.621803  | 1.589754  |
| C  | 0.718062  | 5.614499  | 1.640496  |
| H  | 2.440976  | 6.102966  | 0.435574  |
| H  | -0.993041 | 4.832638  | 2.706634  |
| H  | 0.680478  | 6.590470  | 2.129154  |
| C  | 1.902113  | 1.482826  | -1.323653 |
| H  | 2.887379  | 1.589112  | -0.831044 |
| H  | 1.848654  | 2.269951  | -2.096199 |
| O  | 1.751113  | 0.246580  | -1.937746 |
| H  | -1.654416 | -1.288009 | 3.746046  |
| H  | 0.986244  | -4.167031 | 3.474573  |
| H  | -0.566270 | -4.953493 | 2.789462  |
| O  | 2.821164  | -1.346953 | -0.192222 |
| C  | 4.108122  | -1.475818 | -0.364930 |
| C  | 4.777182  | -0.916478 | -1.488893 |
| C  | 4.920292  | -2.188977 | 0.557579  |
| C  | 6.149052  | -1.066440 | -1.667172 |
| H  | 4.175796  | -0.369004 | -2.219089 |
| C  | 6.291874  | -2.333409 | 0.366447  |
| H  | 4.444043  | -2.630613 | 1.438885  |
| C  | 6.926653  | -1.775348 | -0.746475 |
| H  | 6.622021  | -0.621629 | -2.548077 |
| H  | 6.877295  | -2.893512 | 1.101940  |
| H  | 8.002320  | -1.892512 | -0.894117 |
| Na | 1.484647  | -2.445468 | 1.154493  |
| H  | -6.214114 | -1.015553 | 0.900660  |
| H  | -4.568838 | -3.488419 | -2.214687 |
| C  | -4.327742 | 0.958995  | 0.851507  |
| H  | -5.265653 | 1.121622  | 1.398270  |
| H  | -3.517629 | 0.850456  | 1.591941  |
| H  | -4.103510 | 1.862442  | 0.265913  |
| C  | -2.409874 | -1.938363 | -2.830953 |
| H  | -2.615164 | -1.387375 | -3.763086 |
| H  | -1.418478 | -1.620506 | -2.477586 |
| H  | -2.364271 | -3.005637 | -3.085514 |

96

Figure\_S2-1\_PA-9b(NaOPh)-pc(1,6minor) / electronic energy: -3988.23004284 a.u. / lowest freq: 13.92 cm<sup>-1</sup>

|   |           |           |           |
|---|-----------|-----------|-----------|
| C | -2.128192 | -1.673600 | -1.649696 |
| H | -2.794970 | -2.374368 | -1.129738 |
| C | -2.840536 | -0.364051 | -1.996836 |
| H | -3.004390 | -0.234152 | -3.075656 |
| C | -0.913413 | 0.108280  | -0.758171 |
| C | -2.034454 | 2.027139  | -1.781224 |
| C | -2.822977 | 2.844724  | -0.959451 |
| C | -1.388651 | 2.524497  | -2.930515 |
| C | -2.910608 | 4.206930  | -1.278892 |
| C | -1.497466 | 3.888000  | -3.208979 |
| C | -2.246943 | 4.726474  | -2.383739 |
| H | -2.323687 | 5.791348  | -2.614389 |

|    |           |           |           |
|----|-----------|-----------|-----------|
| Cu | 0.655581  | 1.049814  | 0.015102  |
| N  | -1.045644 | -1.217452 | -0.774629 |
| N  | -1.900077 | 0.639817  | -1.487388 |
| C  | 1.956266  | 1.497100  | 1.523873  |
| C  | 0.694920  | 1.178925  | 2.115626  |
| H  | -2.225082 | -2.077384 | 1.454321  |
| H  | -3.810307 | -0.271561 | -1.482193 |
| H  | -1.706301 | -2.176345 | -2.535678 |
| H  | 2.157885  | 2.561176  | 1.393696  |
| C  | -0.292376 | 2.286212  | 2.261136  |
| C  | 0.402241  | -0.053257 | 2.894912  |
| O  | 0.189999  | 3.456576  | 1.848857  |
| O  | -1.435508 | 2.179409  | 2.664375  |
| O  | -0.542667 | -0.191916 | 3.646636  |
| O  | 1.301394  | -1.017660 | 2.735230  |
| C  | 1.116522  | -2.214921 | 3.490548  |
| H  | 1.200549  | -2.002894 | 4.565191  |
| H  | 1.922568  | -2.886879 | 3.176978  |
| H  | 0.132738  | -2.644489 | 3.262316  |
| C  | -0.697048 | 4.567024  | 1.827262  |
| H  | -1.473266 | 4.418730  | 1.063836  |
| H  | -0.084754 | 5.436227  | 1.566352  |
| H  | -1.167087 | 4.711559  | 2.808866  |
| C  | -0.083563 | -2.132371 | -0.176875 |
| H  | 0.486160  | -1.526842 | 0.540534  |
| C  | 0.900685  | -2.669768 | -1.201685 |
| C  | 0.641144  | -3.820057 | -1.955730 |
| C  | 2.105602  | -1.986592 | -1.412695 |
| C  | 1.568197  | -4.280862 | -2.891617 |
| H  | -0.291394 | -4.371492 | -1.816431 |
| C  | 3.035836  | -2.448386 | -2.341488 |
| H  | 2.322331  | -1.072222 | -0.851945 |
| C  | 2.769276  | -3.599646 | -3.083757 |
| H  | 1.350580  | -5.181858 | -3.469529 |
| H  | 3.973020  | -1.904544 | -2.477811 |
| H  | 3.497565  | -3.964543 | -3.811338 |
| C  | -0.793137 | -3.211796 | 0.646041  |
| H  | -0.020316 | -3.902315 | 1.021944  |
| H  | -1.455134 | -3.816138 | -0.005970 |
| O  | -1.481924 | -2.689987 | 1.733236  |
| C  | 3.113015  | 0.627330  | 1.380067  |
| H  | 2.981953  | -0.434299 | 1.576433  |
| C  | 4.309537  | 1.092366  | 0.967840  |
| H  | 4.428788  | 2.168740  | 0.803849  |
| C  | 5.502733  | 0.272116  | 0.718482  |
| C  | 6.752976  | 0.898003  | 0.596117  |
| C  | 5.440415  | -1.124665 | 0.570957  |
| C  | 7.906421  | 0.155679  | 0.348741  |
| H  | 6.819205  | 1.984375  | 0.698403  |
| C  | 6.590485  | -1.865483 | 0.320116  |
| H  | 4.477902  | -1.637682 | 0.623696  |
| C  | 7.829584  | -1.229615 | 0.210133  |
| H  | 8.869598  | 0.662700  | 0.258990  |
| H  | 6.518050  | -2.948451 | 0.197889  |
| H  | 8.731039  | -1.812554 | 0.009389  |
| C  | 1.718668  | 1.948489  | -1.388048 |
| H  | 1.202894  | 2.815015  | -1.830772 |
| C  | 2.871267  | 1.606817  | -1.875844 |
| C  | 4.044178  | 1.205079  | -2.336045 |
| H  | 4.982481  | 1.590754  | -1.924299 |
| H  | 4.114967  | 0.478855  | -3.152917 |
| Na | -2.691032 | 0.223828  | 2.905612  |
| O  | -3.470524 | -1.061131 | 1.284859  |
| C  | -4.543884 | -1.618698 | 0.802828  |
| C  | -4.644701 | -3.028137 | 0.630868  |
| C  | -5.671875 | -0.854205 | 0.397907  |
| C  | -5.778300 | -3.615304 | 0.076187  |
| H  | -3.803938 | -3.645377 | 0.960023  |
| C  | -6.799893 | -1.455185 | -0.154202 |
| H  | -5.633215 | 0.230197  | 0.526700  |
| C  | -6.869235 | -2.840354 | -0.327860 |
| H  | -5.812215 | -4.702762 | -0.040662 |
| H  | -7.643451 | -0.827277 | -0.456838 |
| H  | -7.755519 | -3.305828 | -0.764104 |
| H  | -0.993315 | 4.296498  | -4.088073 |
| H  | -3.518390 | 4.861634  | -0.648572 |
| C  | -3.583647 | 2.300483  | 0.218989  |
| H  | -3.423623 | 1.223342  | 0.363622  |
| H  | -3.284465 | 2.812762  | 1.145070  |
| H  | -4.662354 | 2.471597  | 0.080289  |
| C  | -0.615137 | 1.602605  | -3.834400 |
| H  | -0.131234 | 2.164530  | -4.644249 |
| H  | 0.164770  | 1.061098  | -3.279691 |
| H  | -1.276849 | 0.851636  | -4.293955 |

96

Figure\_S2-1\_PA-9b(NaOPh)-ts(1,6minor) / electronic energy: -3988.21330777 a.u. / lowest freq: -465.41 cm<sup>-1</sup>

|   |           |          |          |
|---|-----------|----------|----------|
| C | -2.703452 | 1.527561 | 1.353933 |
| H | -3.342978 | 1.905825 | 0.548817 |
| C | -3.155336 | 0.143503 | 1.821047 |

|    |           |           |           |
|----|-----------|-----------|-----------|
| H  | -3.272644 | 0.071523  | 2.913922  |
| C  | -1.014417 | -0.030756 | 0.881243  |
| C  | -2.102740 | -2.123289 | 1.644653  |
| C  | -2.975158 | -2.920971 | 0.883049  |
| C  | -1.370947 | -2.661514 | 2.721948  |
| C  | -3.092329 | -4.276835 | 1.209117  |
| C  | -1.500112 | -4.026170 | 2.996819  |
| C  | -2.357832 | -4.829913 | 2.251286  |
| H  | -2.457981 | -5.891270 | 2.488351  |
| Cu | 0.859807  | -0.558380 | 0.410665  |
| N  | -1.350496 | 1.261217  | 0.853276  |
| N  | -2.047049 | -0.720818 | 1.386494  |
| C  | 2.331979  | -1.418163 | -0.920109 |
| C  | 1.048918  | -1.306588 | -1.572761 |
| H  | -2.438726 | 1.975637  | -1.581425 |
| H  | -4.101670 | -0.162762 | 1.352981  |
| H  | -2.688138 | 2.269838  | 2.164430  |
| H  | 2.461082  | -2.357793 | -0.374127 |
| C  | 0.147202  | -2.468699 | -1.550408 |
| C  | 0.692124  | -0.195381 | -2.465502 |
| O  | 0.702653  | -3.542964 | -0.980137 |
| O  | -1.000453 | -2.506542 | -1.968308 |
| O  | -0.228000 | -0.181820 | -3.267190 |
| O  | 1.481597  | 0.873607  | -2.320431 |
| C  | 1.192088  | 2.009920  | -3.130770 |
| H  | 1.301819  | 1.762723  | -4.195843 |
| H  | 1.929614  | 2.768787  | -2.846745 |
| H  | 0.170278  | 2.362424  | -2.931149 |
| C  | -0.107745 | -4.698383 | -0.833584 |
| H  | -1.000735 | -4.474812 | -0.236347 |
| H  | 0.513163  | -5.438721 | -0.317822 |
| H  | -0.416811 | -5.085609 | -1.814710 |
| C  | -0.482404 | 2.304778  | 0.336006  |
| H  | 0.254405  | 1.798385  | -0.307085 |
| C  | 0.293606  | 3.040450  | 1.418193  |
| C  | 1.348131  | 3.878162  | 1.033349  |
| C  | 0.033677  | 2.884306  | 2.781895  |
| C  | 2.112520  | 4.551342  | 1.982683  |
| H  | 1.588681  | 3.991999  | -0.027258 |
| C  | 0.796379  | 3.558260  | 3.737016  |
| H  | -0.752112 | 2.204916  | 3.116019  |
| C  | 1.836308  | 4.396519  | 3.341790  |
| H  | 2.934312  | 5.194253  | 1.659717  |
| H  | 0.579539  | 3.416732  | 4.798059  |
| H  | 2.436228  | 4.920867  | 4.088588  |
| C  | -1.263157 | 3.260334  | -0.584936 |
| H  | -0.578174 | 4.072129  | -0.874175 |
| H  | -2.076458 | 3.740584  | -0.003726 |
| O  | -1.722358 | 2.655935  | -1.746480 |
| C  | 3.502782  | -0.663839 | -1.072041 |
| H  | 3.490791  | 0.224788  | -1.700418 |
| C  | 4.646293  | -0.980088 | -0.337409 |
| H  | 4.657466  | -1.966834 | 0.134946  |
| C  | 5.990060  | -0.461868 | -0.692620 |
| C  | 7.125634  | -1.216212 | -0.365546 |
| C  | 6.173511  | 0.771167  | -1.338108 |
| C  | 8.405143  | -0.761858 | -0.682127 |
| H  | 7.001564  | -2.176422 | 0.142453  |
| C  | 7.450542  | 1.226768  | -1.653352 |
| H  | 5.308632  | 1.390169  | -1.586721 |
| C  | 8.573059  | 0.462274  | -1.327830 |
| H  | 9.275623  | -1.367996 | -0.420911 |
| H  | 7.572271  | 2.189941  | -2.154033 |
| H  | 9.574174  | 0.822709  | -1.574003 |
| C  | 1.952881  | 0.073812  | 2.000379  |
| H  | 1.299089  | 0.480418  | 2.772223  |
| C  | 3.218731  | 0.050390  | 1.946370  |
| C  | 4.535742  | -0.023082 | 1.621950  |
| H  | 5.032841  | 0.906130  | 1.328877  |
| H  | 5.171147  | -0.754209 | 2.131239  |
| O  | -3.569546 | 0.815804  | -1.575626 |
| Na | -2.323226 | -0.706554 | -2.549778 |
| C  | -4.803419 | 1.207097  | -1.425874 |
| C  | -5.131349 | 2.570645  | -1.189136 |
| C  | -5.893282 | 0.296363  | -1.470665 |
| C  | -6.446899 | 2.980098  | -0.989008 |
| H  | -4.318714 | 3.302700  | -1.187844 |
| C  | -7.204161 | 0.719154  | -1.269195 |
| H  | -5.682421 | -0.757126 | -1.671689 |
| C  | -7.500188 | 2.062491  | -1.019664 |
| H  | -6.652998 | 4.039557  | -0.809779 |
| H  | -8.012740 | -0.016900 | -1.308984 |
| H  | -8.530570 | 2.387595  | -0.860949 |
| C  | -3.783597 | -2.374056 | -0.261061 |
| H  | -3.538461 | -2.920323 | -1.184349 |
| H  | -4.859107 | -2.512488 | -0.073296 |
| H  | -3.611323 | -1.304644 | -0.435043 |
| C  | -0.473954 | -1.808441 | 3.575976  |
| H  | 0.522893  | -1.709706 | 3.121311  |

|   |           |           |          |
|---|-----------|-----------|----------|
| H | -0.871488 | -0.791004 | 3.700403 |
| H | -0.345925 | -2.256461 | 4.570381 |
| H | -0.935187 | -4.456049 | 3.827526 |
| H | -3.766485 | -4.905046 | 0.621477 |

96

Figure\_S2-1\_PA-9b(NaOPh)-prod(1,6minor) / electronic energy: -3988.27007628 a.u. / lowest freq: 22.13 cm<sup>-1</sup>

|    |           |           |           |
|----|-----------|-----------|-----------|
| C  | -1.838505 | -1.896047 | -1.756205 |
| H  | -2.543113 | -2.556009 | -1.234202 |
| C  | -2.523032 | -0.610976 | -2.232664 |
| H  | -2.611068 | -0.544169 | -3.326279 |
| C  | -0.704229 | -0.056835 | -0.872513 |
| C  | -1.798377 | 1.808220  | -2.007663 |
| C  | -2.569567 | 2.614222  | -1.158134 |
| C  | -1.178098 | 2.319784  | -3.162404 |
| C  | -2.706461 | 3.969876  | -1.486444 |
| C  | -1.356067 | 3.670445  | -3.465816 |
| C  | -2.113781 | 4.492005  | -2.631537 |
| H  | -2.240595 | 5.548845  | -2.876077 |
| Cu | 0.539189  | 0.962392  | 0.195761  |
| N  | -0.811616 | -1.385493 | -0.842576 |
| N  | -1.625903 | 0.425757  | -1.711311 |
| C  | 1.773970  | 1.572949  | 1.755357  |
| C  | 0.549606  | 1.215626  | 2.479977  |
| H  | -2.127055 | -2.327875 | 1.252199  |
| H  | -3.527294 | -0.493834 | -1.793870 |
| H  | -1.370648 | -2.462610 | -2.578414 |
| H  | 1.942138  | 2.651634  | 1.688543  |
| C  | -0.447461 | 2.251077  | 2.684755  |
| C  | 0.313927  | -0.086492 | 3.077370  |
| O  | -0.022005 | 3.477590  | 2.315052  |
| O  | -1.594307 | 2.104219  | 3.100705  |
| O  | -0.679033 | -0.438659 | 3.703881  |
| O  | 1.332713  | -0.946831 | 2.901028  |
| C  | 1.170746  | -2.248013 | 3.450052  |
| H  | 1.136726  | -2.204926 | 4.548214  |
| H  | 2.050201  | -2.818380 | 3.128832  |
| H  | 0.245502  | -2.706515 | 3.073978  |
| C  | -0.962209 | 4.533948  | 2.348720  |
| H  | -1.747603 | 4.386778  | 1.591525  |
| H  | -0.402906 | 5.447546  | 2.117529  |
| H  | -1.433415 | 4.621910  | 3.337086  |
| C  | 0.127955  | -2.246619 | -0.147964 |
| H  | 0.538170  | -1.640048 | 0.674896  |
| C  | 1.301857  | -2.661208 | -1.032264 |
| C  | 2.239329  | -3.597456 | -0.574213 |
| C  | 1.520100  | -2.069262 | -2.282246 |
| C  | 3.341034  | -3.950716 | -1.351310 |
| H  | 2.122601  | -4.056928 | 0.409233  |
| C  | 2.626457  | -2.415263 | -3.059154 |
| H  | 0.823151  | -1.320283 | -2.661058 |
| C  | 3.538594  | -3.363208 | -2.600594 |
| H  | 4.054712  | -4.685283 | -0.971709 |
| H  | 2.772743  | -1.937309 | -4.030211 |
| H  | 4.404119  | -3.635906 | -3.208084 |
| C  | -0.613554 | -3.417907 | 0.511796  |
| H  | 0.130443  | -4.101590 | 0.945373  |
| H  | -1.140785 | -4.000985 | -0.271084 |
| O  | -1.456852 | -3.014995 | 1.537894  |
| C  | 2.650363  | 0.781706  | 1.056011  |
| H  | 2.630216  | -0.305282 | 1.152478  |
| C  | 3.771589  | 1.393463  | 0.239171  |
| H  | 4.067208  | 2.344085  | 0.710084  |
| C  | 4.991719  | 0.495417  | 0.185902  |
| C  | 6.228496  | 0.936495  | 0.665638  |
| C  | 4.902070  | -0.796406 | -0.349997 |
| C  | 7.352096  | 0.109737  | 0.615085  |
| H  | 6.314379  | 1.940360  | 1.090382  |
| C  | 6.022138  | -1.623113 | -0.403838 |
| H  | 3.945745  | -1.169191 | -0.729208 |
| C  | 7.252092  | -1.172947 | 0.078931  |
| H  | 8.308673  | 0.471854  | 0.998922  |
| H  | 5.929329  | -2.625688 | -0.827033 |
| H  | 8.129425  | -1.822443 | 0.038496  |
| C  | 1.149077  | 3.320716  | -1.149669 |
| H  | 0.275200  | 3.949499  | -1.123653 |
| C  | 2.134156  | 2.616275  | -1.216295 |
| C  | 3.309348  | 1.745426  | -1.206671 |
| H  | 4.136374  | 2.233237  | -1.746700 |
| H  | 3.070033  | 0.817728  | -1.753384 |
| Na | -2.710183 | 0.052202  | 2.796363  |
| O  | -3.326091 | -1.230985 | 1.081231  |
| C  | -4.413554 | -1.717160 | 0.555333  |
| C  | -4.571256 | -3.110795 | 0.308828  |
| C  | -5.504242 | -0.886658 | 0.175782  |
| C  | -5.721534 | -3.620830 | -0.286097 |
| H  | -3.762603 | -3.779347 | 0.617080  |
| C  | -6.648901 | -1.411212 | -0.418659 |
| H  | -5.425600 | 0.187508  | 0.360130  |
| C  | -6.774157 | -2.781625 | -0.662674 |

|   |           |           |           |
|---|-----------|-----------|-----------|
| H | -5.800162 | -4.699002 | -0.455601 |
| H | -7.461261 | -0.733350 | -0.697983 |
| H | -7.673991 | -3.187596 | -1.129615 |
| H | -0.879503 | 4.087415  | -4.356005 |
| H | -3.303260 | 4.615928  | -0.837313 |
| C | -3.216483 | 2.066199  | 0.082968  |
| H | -3.239259 | 0.968390  | 0.103479  |
| H | -2.673068 | 2.394555  | 0.982801  |
| H | -4.246183 | 2.441535  | 0.177614  |
| C | -0.286019 | 1.443407  | -3.997464 |
| H | 0.061731  | 1.973370  | -4.893655 |
| H | 0.599143  | 1.145924  | -3.411703 |
| H | -0.791204 | 0.520818  | -4.319326 |

121

Figure\_S3-1\_AA-9d(NaO<sub>Ph</sub>)-prod(1,6major) / electronic energy: -4439.10399315 a.u. / lowest freq: 15.52 cm<sup>-1</sup>

|    |           |           |           |
|----|-----------|-----------|-----------|
| H  | 1.745022  | 3.046511  | -3.349345 |
| H  | 0.490706  | 1.002296  | -3.163602 |
| C  | 2.554172  | 2.112788  | -1.557677 |
| C  | 1.134413  | 0.286066  | -2.642912 |
| H  | 3.588725  | 2.241020  | -1.921206 |
| C  | 2.174286  | 0.667160  | -1.843647 |
| H  | 1.001980  | -0.765112 | -2.911212 |
| B  | 3.117203  | -0.465489 | -1.297933 |
| O  | 2.754485  | -1.779265 | -1.247926 |
| H  | 5.244427  | -1.818743 | -2.801013 |
| O  | 4.379438  | -0.238108 | -0.836578 |
| H  | 6.587384  | -0.959100 | -2.009696 |
| C  | 5.863992  | -1.778520 | -1.893238 |
| H  | 4.169721  | -3.771597 | -2.249130 |
| C  | 5.016001  | -1.520610 | -0.649324 |
| C  | 3.782297  | -2.494736 | -0.527418 |
| C  | 3.982217  | -3.856479 | -1.171527 |
| H  | 6.420730  | -2.721849 | -1.808131 |
| H  | 3.079587  | -4.465761 | -1.030527 |
| H  | 3.075141  | -1.694212 | 1.383689  |
| H  | 2.359494  | -3.247079 | 0.898002  |
| C  | 3.288972  | -2.661713 | 0.907120  |
| H  | 6.718111  | -0.742852 | 0.417642  |
| C  | 5.897668  | -1.454624 | 0.587000  |
| H  | 5.334856  | -1.122855 | 1.468555  |
| H  | 4.830229  | -4.379226 | -0.704738 |
| H  | 4.022043  | -3.204437 | 1.520003  |
| H  | 6.337933  | -2.440141 | 0.798427  |
| H  | 1.985405  | 4.163213  | -1.986594 |
| C  | 1.676140  | 3.143177  | -2.255827 |
| H  | 0.618183  | 3.026704  | -1.978606 |
| C  | -2.696149 | -2.596571 | -0.805801 |
| H  | -3.321053 | -2.744372 | 0.088315  |
| C  | -3.245632 | -1.501532 | -1.718668 |
| H  | -3.192180 | -1.792130 | -2.780062 |
| C  | -1.239725 | -0.767429 | -0.753173 |
| C  | -2.519639 | 0.892190  | -2.007373 |
| C  | -2.001824 | 2.025826  | -1.366445 |
| C  | -3.244913 | 1.037109  | -3.188923 |
| C  | -2.151111 | 3.289489  | -1.935104 |
| C  | -3.428767 | 2.302164  | -3.761774 |
| C  | -2.864772 | 3.412932  | -3.135376 |
| H  | -2.993135 | 4.403323  | -3.581546 |
| Cu | 0.413935  | 0.311131  | -0.541032 |
| N  | -1.393159 | -2.046811 | -0.421643 |
| N  | -2.326653 | -0.388020 | -1.453307 |
| C  | 1.125528  | 1.060757  | 1.646386  |
| C  | 0.095143  | 0.803376  | 2.617943  |
| H  | -2.422876 | -2.070384 | 2.112661  |
| H  | -4.278270 | -1.216510 | -1.475806 |
| H  | -2.574225 | -3.561427 | -1.317650 |
| H  | 2.024875  | 0.459185  | 1.820340  |
| C  | -1.102927 | 1.589015  | 2.764070  |
| C  | 0.294744  | -0.289863 | 3.548542  |
| O  | -1.153732 | 2.681276  | 1.961336  |
| O  | -2.050949 | 1.365924  | 3.513882  |
| O  | -0.364484 | -0.546739 | 4.549974  |
| O  | 1.358131  | -1.070369 | 3.238681  |
| C  | 1.620705  | -2.153634 | 4.105538  |
| H  | 1.844582  | -1.807793 | 5.125274  |
| H  | 2.492623  | -2.672678 | 3.690448  |
| H  | 0.761934  | -2.839023 | 4.148879  |
| C  | -2.289227 | 3.517709  | 2.103112  |
| H  | -3.191067 | 3.035523  | 1.697144  |
| H  | -2.071329 | 4.429281  | 1.536952  |
| H  | -2.468436 | 3.766033  | 3.157531  |
| C  | -0.405592 | -2.848782 | 0.271975  |
| H  | 0.429203  | -2.161557 | 0.487424  |
| C  | 0.106054  | -3.973923 | -0.621543 |
| C  | 0.433199  | -5.237795 | -0.117131 |
| C  | 0.276319  | -3.744899 | -1.992374 |
| C  | 0.910278  | -6.243322 | -0.960720 |
| H  | 0.318469  | -5.460461 | 0.944354  |
| C  | 0.748671  | -4.744967 | -2.836875 |

|    |           |           |           |
|----|-----------|-----------|-----------|
| H  | 0.030235  | -2.764675 | -2.404100 |
| C  | 1.066990  | -6.002940 | -2.323326 |
| H  | 1.155433  | -7.222457 | -0.543740 |
| H  | 0.873081  | -4.540415 | -3.902407 |
| H  | 1.436548  | -6.790210 | -2.983727 |
| C  | -0.961482 | -3.328270 | 1.621732  |
| H  | -0.134251 | -3.785609 | 2.187158  |
| H  | -1.710790 | -4.126250 | 1.451603  |
| O  | -1.478034 | -2.282249 | 2.366187  |
| C  | 1.241454  | 1.960772  | 0.607596  |
| H  | 0.434346  | 2.673290  | 0.436076  |
| C  | 2.586125  | 2.284334  | -0.011498 |
| H  | 3.306989  | 1.538839  | 0.358517  |
| C  | 3.142384  | 3.641561  | 0.395065  |
| C  | 4.493770  | 3.918176  | 0.140980  |
| C  | 2.368172  | 4.636024  | 1.001864  |
| C  | 5.051683  | 5.151498  | 0.467492  |
| H  | 5.120488  | 3.145648  | -0.314383 |
| C  | 2.923191  | 5.875169  | 1.329618  |
| H  | 1.319741  | 4.443058  | 1.237127  |
| C  | 4.264367  | 6.140023  | 1.061441  |
| H  | 6.108246  | 5.340870  | 0.263835  |
| H  | 2.298977  | 6.636698  | 1.803088  |
| H  | 4.698445  | 7.108600  | 1.319188  |
| C  | -4.208387 | 2.437319  | -5.043787 |
| H  | -3.684165 | 1.945658  | -5.878226 |
| H  | -5.196207 | 1.960479  | -4.954943 |
| H  | -4.359873 | 3.491318  | -5.313259 |
| C  | -1.586238 | 4.515516  | -1.266281 |
| H  | -0.878724 | 4.252453  | -0.468340 |
| H  | -1.057436 | 5.151473  | -1.991365 |
| H  | -2.388388 | 5.125487  | -0.821751 |
| H  | -1.516713 | 1.919262  | -0.394670 |
| H  | -3.675642 | 0.164497  | -3.682449 |
| O  | -3.919748 | -1.599218 | 2.322942  |
| Na | -2.618894 | -0.793222 | 4.046991  |
| C  | -4.651103 | -0.939401 | 1.470576  |
| C  | -4.291409 | 0.354244  | 1.005846  |
| C  | -5.851040 | -1.485090 | 0.936781  |
| C  | -5.074456 | 1.048413  | 0.089473  |
| H  | -3.363454 | 0.788631  | 1.383904  |
| C  | -6.625767 | -0.784070 | 0.015578  |
| H  | -6.151014 | -2.482407 | 1.271699  |
| C  | -6.250391 | 0.490506  | -0.421251 |
| H  | -4.749549 | 2.036864  | -0.249373 |
| H  | -7.540625 | -1.242552 | -0.372345 |
| H  | -6.859250 | 1.036680  | -1.144941 |

121

Figure\_S3-1\_AA-9d(NaO<sub>4</sub>Ph)-ts(1,6major) / electronic energy: -4439.05034678 a.u. / lowest freq: -323.92 cm<sup>-1</sup>

|   |           |           |           |
|---|-----------|-----------|-----------|
| H | 1.531852  | 2.790146  | -2.844247 |
| H | 0.412404  | 0.668919  | -2.120806 |
| C | 2.797337  | 1.816802  | -1.391465 |
| C | 1.106764  | 0.026893  | -1.562237 |
| H | 3.863212  | 2.053348  | -1.431478 |
| C | 2.443015  | 0.473043  | -1.394451 |
| H | 0.980905  | -1.042579 | -1.772976 |
| B | 3.549881  | -0.575461 | -1.074372 |
| O | 3.441876  | -1.912723 | -1.338260 |
| H | 5.931808  | -1.231726 | -2.662388 |
| O | 4.741925  | -0.257658 | -0.472719 |
| H | 7.060334  | -0.324564 | -1.628083 |
| C | 6.504967  | -1.268332 | -1.724530 |
| H | 5.229237  | -3.418982 | -2.572010 |
| C | 5.584466  | -1.424315 | -0.514875 |
| C | 4.533680  | -2.583052 | -0.684149 |
| C | 5.003175  | -3.742626 | -1.548148 |
| H | 7.229857  | -2.091893 | -1.788292 |
| H | 4.215154  | -4.506333 | -1.598906 |
| H | 3.651512  | -2.278459 | 1.288468  |
| H | 3.127599  | -3.747121 | 0.434681  |
| C | 3.993170  | -3.103209 | 0.645751  |
| H | 7.113959  | -0.653716 | 0.796776  |
| C | 6.403413  | -1.492079 | 0.764517  |
| H | 5.765500  | -1.434395 | 1.655594  |
| H | 5.903640  | -4.204201 | -1.116173 |
| H | 4.745148  | -3.690144 | 1.191751  |
| H | 6.978935  | -2.428896 | 0.803870  |
| H | 2.263621  | 3.895688  | -1.653947 |
| C | 1.835048  | 2.893134  | -1.787389 |
| H | 0.911582  | 2.826075  | -1.190317 |
| C | -3.316186 | -2.155874 | -1.398300 |
| H | -4.156754 | -2.422195 | -0.742036 |
| C | -3.526707 | -0.799318 | -2.066112 |
| H | -3.326121 | -0.836908 | -3.148082 |
| C | -1.704143 | -0.654114 | -0.602983 |
| C | -2.484833 | 1.435382  | -1.641874 |
| C | -1.809491 | 2.309622  | -0.779549 |
| C | -3.152709 | 1.955574  | -2.751481 |
| C | -1.767565 | 3.677195  | -1.042649 |

|    |           |           |           |
|----|-----------|-----------|-----------|
| C  | -3.141830 | 3.329489  | -3.019984 |
| C  | -2.438441 | 4.176874  | -2.166502 |
| H  | -2.413719 | 5.251094  | -2.370520 |
| Cu | 0.006515  | -0.027793 | 0.205264  |
| N  | -2.104610 | -1.925704 | -0.604990 |
| N  | -2.531322 | 0.048634  | -1.397788 |
| C  | 1.290145  | 0.606135  | 1.703137  |
| C  | 0.072517  | 0.119888  | 2.333086  |
| H  | -3.772351 | -2.876610 | 1.379068  |
| H  | -4.536850 | -0.400204 | -1.902121 |
| H  | -3.165656 | -2.967768 | -2.123805 |
| H  | 2.089341  | -0.139005 | 1.673567  |
| C  | -1.064345 | 0.956159  | 2.742909  |
| C  | 0.072792  | -1.253207 | 2.856704  |
| O  | -0.865063 | 2.269668  | 2.563347  |
| O  | -2.126197 | 0.558475  | 3.193476  |
| O  | -0.778040 | -1.764397 | 3.566541  |
| O  | 1.144058  | -1.974137 | 2.479366  |
| C  | 1.222875  | -3.294105 | 2.994442  |
| H  | 1.319956  | -3.281337 | 4.088911  |
| H  | 2.111922  | -3.745191 | 2.543777  |
| H  | 0.326134  | -3.872662 | 2.730344  |
| C  | -1.948725 | 3.133843  | 2.880121  |
| H  | -2.757723 | 3.021644  | 2.142576  |
| H  | -1.545574 | 4.150890  | 2.838491  |
| H  | -2.341646 | 2.921775  | 3.882390  |
| C  | -1.362628 | -3.015194 | 0.003200  |
| H  | -0.779124 | -2.571576 | 0.823411  |
| C  | -0.383693 | -3.671350 | -0.965527 |
| C  | 0.492411  | -4.657421 | -0.493098 |
| C  | -0.310138 | -3.311832 | -2.314249 |
| C  | 1.403379  | -5.275553 | -1.345862 |
| H  | 0.475264  | -4.942237 | 0.561573  |
| C  | 0.603113  | -3.927137 | -3.170944 |
| H  | -0.954685 | -2.525176 | -2.709034 |
| C  | 1.461414  | -4.913066 | -2.691690 |
| H  | 2.078891  | -6.038961 | -0.953216 |
| H  | 0.646441  | -3.624325 | -4.219179 |
| H  | 2.179335  | -5.391531 | -3.361013 |
| C  | -2.317716 | -4.042085 | 0.638678  |
| H  | -1.705482 | -4.860969 | 1.043526  |
| H  | -2.944550 | -4.492864 | -0.154612 |
| O  | -3.079136 | -3.526747 | 1.679268  |
| C  | 1.706295  | 1.923543  | 1.411283  |
| H  | 1.000152  | 2.739469  | 1.544959  |
| C  | 2.975350  | 2.175312  | 0.914239  |
| H  | 3.702124  | 1.361087  | 0.943297  |
| C  | 3.574831  | 3.519582  | 0.821940  |
| C  | 4.958519  | 3.630495  | 0.603164  |
| C  | 2.828916  | 4.704466  | 0.931775  |
| C  | 5.574376  | 4.874565  | 0.496418  |
| H  | 5.551401  | 2.716561  | 0.507877  |
| C  | 3.443320  | 5.949760  | 0.823856  |
| H  | 1.751275  | 4.657613  | 1.094795  |
| C  | 4.818571  | 6.042924  | 0.605105  |
| H  | 6.651842  | 4.933812  | 0.326072  |
| H  | 2.841462  | 6.857418  | 0.910511  |
| H  | 5.298290  | 7.020266  | 0.519104  |
| C  | -3.895631 | 3.862314  | -4.210348 |
| H  | -3.611585 | 3.331642  | -5.131537 |
| H  | -4.979789 | 3.722745  | -4.076124 |
| H  | -3.708280 | 4.934164  | -4.360492 |
| C  | -1.017767 | 4.615813  | -0.135240 |
| H  | -0.476459 | 4.064653  | 0.643801  |
| H  | -0.285848 | 5.209369  | -0.703696 |
| H  | -1.702311 | 5.323228  | 0.357787  |
| H  | -1.322372 | 1.929538  | 0.118541  |
| H  | -3.705789 | 1.299131  | -3.423292 |
| O  | -4.649250 | -1.533846 | 1.626024  |
| Na | -3.032395 | -1.546919 | 3.183395  |
| C  | -5.240819 | -0.644347 | 0.889136  |
| C  | -4.783849 | 0.701559  | 0.828275  |
| C  | -6.367852 | -0.961991 | 0.080743  |
| C  | -5.390210 | 1.642867  | 0.004416  |
| H  | -3.911075 | 0.968243  | 1.431189  |
| C  | -6.970611 | -0.008573 | -0.737110 |
| H  | -6.749076 | -1.987051 | 0.114924  |
| C  | -6.489206 | 1.303127  | -0.792408 |
| H  | -4.982268 | 2.657726  | -0.034847 |
| H  | -7.831630 | -0.296643 | -1.348353 |
| H  | -6.957778 | 2.044331  | -1.443532 |

121

Figure\_S3-1\_AA-9d(Na0Ph)-pc(1,6major) / electronic energy: -4439.05320939 a.u. / lowest freq: 15.82 cm<sup>-1</sup>

|   |          |          |           |
|---|----------|----------|-----------|
| H | 1.390491 | 2.785442 | -2.863349 |
| H | 0.409655 | 0.632363 | -2.139803 |
| C | 2.835911 | 1.760402 | -1.613248 |
| C | 1.074808 | 0.019306 | -1.511761 |
| H | 3.900389 | 2.007841 | -1.566204 |
| C | 2.462249 | 0.460232 | -1.462828 |

|    |           |           |           |
|----|-----------|-----------|-----------|
| H  | 0.967804  | -1.047222 | -1.757973 |
| B  | 3.560676  | -0.586697 | -1.121141 |
| O  | 3.429147  | -1.932566 | -1.337439 |
| H  | 5.930928  | -1.338963 | -2.690321 |
| O  | 4.762612  | -0.275037 | -0.530712 |
| H  | 7.077683  | -0.421658 | -1.685970 |
| C  | 6.504453  | -1.357436 | -1.752147 |
| H  | 5.176995  | -3.507458 | -2.536221 |
| C  | 5.582029  | -1.456909 | -0.537553 |
| C  | 4.510409  | -2.601697 | -0.669333 |
| C  | 4.957194  | -3.794590 | -1.500213 |
| H  | 7.213822  | -2.196029 | -1.790792 |
| H  | 4.159168  | -4.549248 | -1.519940 |
| H  | 3.640175  | -2.231335 | 1.299213  |
| H  | 3.086364  | -3.709277 | 0.481428  |
| C  | 3.965019  | -3.077524 | 0.675833  |
| H  | 7.130603  | -0.677657 | 0.747443  |
| C  | 6.402029  | -1.501079 | 0.742554  |
| H  | 5.767267  | -1.400576 | 1.632147  |
| H  | 5.855790  | -4.254424 | -1.062328 |
| H  | 4.706760  | -3.665386 | 1.234807  |
| H  | 6.957160  | -2.448367 | 0.812356  |
| H  | 2.350737  | 3.859298  | -1.810208 |
| C  | 1.870121  | 2.873060  | -1.872144 |
| H  | 1.051268  | 2.838353  | -1.133804 |
| C  | -3.328147 | -2.121585 | -1.401213 |
| H  | -4.173647 | -2.387390 | -0.750976 |
| C  | -3.527649 | -0.758643 | -2.058652 |
| H  | -3.316460 | -0.785894 | -3.139026 |
| C  | -1.716813 | -0.634036 | -0.580540 |
| C  | -2.475018 | 1.466814  | -1.616099 |
| C  | -1.757698 | 2.329535  | -0.776203 |
| C  | -3.166603 | 2.000206  | -2.704922 |
| C  | -1.698621 | 3.696056  | -1.040113 |
| C  | -3.139200 | 3.373922  | -2.973497 |
| C  | -2.395221 | 4.208609  | -2.142403 |
| H  | -2.357160 | 5.282214  | -2.347540 |
| Cu | 0.010053  | -0.023118 | 0.208961  |
| N  | -2.119417 | -1.904584 | -0.600458 |
| N  | -2.535764 | 0.080373  | -1.373849 |
| C  | 1.280773  | 0.559578  | 1.674581  |
| C  | 0.055213  | 0.109678  | 2.300669  |
| H  | -3.802723 | -2.834264 | 1.375639  |
| H  | -4.538337 | -0.358817 | -1.900557 |
| H  | -3.179595 | -2.929006 | -2.132004 |
| H  | 2.068281  | -0.197882 | 1.662262  |
| C  | -1.072272 | 0.972114  | 2.709892  |
| C  | 0.027748  | -1.265260 | 2.842661  |
| O  | -0.849375 | 2.278782  | 2.534114  |
| O  | -2.139783 | 0.586671  | 3.151211  |
| O  | -0.824816 | -1.741433 | 3.570312  |
| O  | 1.076828  | -2.007934 | 2.461765  |
| C  | 1.141639  | -3.324496 | 2.990289  |
| H  | 1.249288  | -3.299563 | 4.083361  |
| H  | 2.020302  | -3.791352 | 2.535541  |
| H  | 0.233542  | -3.891035 | 2.739793  |
| C  | -1.924818 | 3.162374  | 2.830515  |
| H  | -2.720898 | 3.059440  | 2.077967  |
| H  | -1.503767 | 4.172022  | 2.792639  |
| H  | -2.337364 | 2.958650  | 3.826447  |
| C  | -1.388864 | -3.002226 | 0.005926  |
| H  | -0.797982 | -2.564401 | 0.823102  |
| C  | -0.417299 | -3.670123 | -0.962109 |
| C  | 0.445448  | -4.667696 | -0.488932 |
| C  | -0.334452 | -3.307887 | -2.309302 |
| C  | 1.352677  | -5.294015 | -1.339600 |
| H  | 0.420807  | -4.955899 | 0.564598  |
| C  | 0.574206  | -3.932293 | -3.164203 |
| H  | -0.966023 | -2.510541 | -2.703358 |
| C  | 1.419463  | -4.929124 | -2.684405 |
| H  | 2.017817  | -6.066086 | -0.946184 |
| H  | 0.625514  | -3.626794 | -4.211278 |
| H  | 2.134518  | -5.413931 | -3.352203 |
| C  | -2.355748 | -4.015288 | 0.645262  |
| H  | -1.754346 | -4.839597 | 1.055403  |
| H  | -2.987645 | -4.462329 | -0.146030 |
| O  | -3.111746 | -3.483774 | 1.682041  |
| C  | 1.768568  | 1.906314  | 1.500928  |
| H  | 1.068719  | 2.727809  | 1.635274  |
| C  | 3.056066  | 2.149317  | 1.151844  |
| H  | 3.743506  | 1.304894  | 1.055075  |
| C  | 3.662006  | 3.473044  | 0.957628  |
| C  | 5.036724  | 3.553394  | 0.678044  |
| C  | 2.930276  | 4.671069  | 1.022242  |
| C  | 5.659167  | 4.781971  | 0.472087  |
| H  | 5.615458  | 2.628385  | 0.609476  |
| C  | 3.551056  | 5.899582  | 0.816075  |
| H  | 1.858589  | 4.646425  | 1.226410  |
| C  | 4.918539  | 5.962594  | 0.540312  |



|    |           |           |           |
|----|-----------|-----------|-----------|
| H  | 6.729177  | 4.818812  | 0.255084  |
| H  | 2.961952  | 6.818126  | 0.868798  |
| H  | 5.403262  | 6.927725  | 0.378017  |
| C  | -3.918729 | 3.919587  | -4.141329 |
| H  | -3.656371 | 3.396917  | -5.073543 |
| H  | -4.999931 | 3.780708  | -3.984660 |
| H  | -3.732116 | 4.992302  | -4.286118 |
| C  | -0.899827 | 4.619236  | -0.158830 |
| H  | -0.361885 | 4.059913  | 0.616869  |
| H  | -0.157831 | 5.178602  | -0.748479 |
| H  | -1.549559 | 5.357042  | 0.336733  |
| H  | -1.246848 | 1.942797  | 0.105082  |
| H  | -3.752729 | 1.355761  | -3.359848 |
| O  | -4.680751 | -1.488834 | 1.616306  |
| Na | -3.086338 | -1.506647 | 3.188851  |
| C  | -5.271307 | -0.604057 | 0.872641  |
| C  | -4.822321 | 0.744637  | 0.813825  |
| C  | -6.388866 | -0.930161 | 0.054685  |
| C  | -5.426217 | 1.680361  | -0.018135 |
| H  | -3.956597 | 1.017984  | 1.423741  |
| C  | -6.989217 | 0.017685  | -0.771410 |
| H  | -6.764178 | -1.957425 | 0.087388  |
| C  | -6.515093 | 1.332074  | -0.825118 |
| H  | -5.024725 | 2.697796  | -0.055697 |
| H  | -7.842244 | -0.277009 | -1.390592 |
| H  | -6.981458 | 2.068929  | -1.482741 |

89

Figure\_S3-1\_9d(NaPh)-Cu-allyl / electronic energy: -3597.06845638 a.u. / lowest freq: 14.75 cm<sup>-1</sup>

|    |           |           |           |
|----|-----------|-----------|-----------|
| Na | 1.466278  | -1.713895 | 0.568774  |
| H  | 4.895602  | -3.588713 | 0.817161  |
| H  | 4.692117  | -0.895972 | -2.541156 |
| O  | 3.335573  | -2.007938 | -0.584046 |
| C  | 5.271052  | -1.564621 | -1.896670 |
| C  | 4.600612  | -2.207337 | -0.820863 |
| H  | 7.102470  | -1.262094 | -2.980981 |
| C  | 6.625148  | -1.776136 | -2.141098 |
| C  | 5.384324  | -3.077572 | -0.017672 |
| C  | 7.377630  | -2.634567 | -1.334758 |
| C  | 6.737508  | -3.280572 | -0.272517 |
| H  | 8.439672  | -2.798024 | -1.529682 |
| H  | 7.306712  | -3.957090 | 0.372185  |
| H  | 1.822369  | -0.807067 | 3.943134  |
| H  | -2.251641 | -0.329887 | 3.139589  |
| C  | 0.449649  | -2.296353 | 3.162582  |
| C  | -1.148749 | -0.342683 | 3.068826  |
| H  | 0.743177  | -3.269591 | 2.747587  |
| C  | -0.656265 | -1.681110 | 2.668089  |
| H  | -0.722254 | 0.025625  | 4.016197  |
| B  | -1.373536 | -2.298457 | 1.423828  |
| O  | -2.713492 | -2.319048 | 1.179742  |
| H  | -1.727987 | -0.728011 | -0.976153 |
| O  | -0.646091 | -2.774963 | 0.347830  |
| H  | -0.369549 | -1.436810 | -1.877879 |
| C  | -1.416767 | -1.592283 | -1.578998 |
| H  | -3.924597 | -1.288533 | -0.925882 |
| C  | -1.545189 | -2.887384 | -0.779148 |
| C  | -2.937112 | -3.023746 | -0.060716 |
| C  | -4.089317 | -2.364956 | -0.799421 |
| H  | -2.035120 | -1.618693 | -2.487150 |
| H  | -5.022038 | -2.500680 | -0.233511 |
| H  | -2.452907 | -4.961768 | 0.822840  |
| H  | -4.156010 | -4.465844 | 0.969667  |
| C  | -3.284310 | -4.466581 | 0.300122  |
| H  | -0.161528 | -3.891634 | -2.091822 |
| C  | -1.138452 | -4.082032 | -1.624394 |
| H  | -1.058778 | -4.996627 | -1.023531 |
| H  | -4.221693 | -2.822726 | -1.791255 |
| H  | -3.534901 | -5.053460 | -0.594647 |
| H  | -1.873021 | -4.249881 | -2.425820 |
| H  | 2.084171  | -2.447422 | 4.577693  |
| C  | 1.310104  | -1.734587 | 4.260318  |
| H  | 0.715848  | -1.463962 | 5.150374  |
| C  | 0.319514  | 2.875268  | -1.993392 |
| H  | 1.033917  | 2.506723  | -2.740473 |
| C  | -1.127654 | 2.540540  | -2.354801 |
| H  | -1.705390 | 3.414017  | -2.684987 |
| C  | -0.661312 | 1.729692  | -0.210974 |
| C  | -3.004911 | 1.645974  | -0.933491 |
| C  | -3.559642 | 1.488554  | 0.340873  |
| C  | -3.804764 | 1.434619  | -2.061581 |
| C  | -4.882144 | 1.072030  | 0.498446  |
| C  | -5.140732 | 1.044490  | -1.923628 |
| C  | -5.665477 | 0.864801  | -0.641218 |
| H  | -6.706703 | 0.550845  | -0.526471 |
| Cu | -0.836713 | 0.775737  | 1.479326  |
| N  | 0.481016  | 2.176611  | -0.718861 |
| N  | -1.650734 | 2.012129  | -1.089715 |
| H  | 2.605203  | -0.823585 | -1.253202 |
| H  | -1.180566 | 1.768453  | -3.138589 |

|   |           |           |           |
|---|-----------|-----------|-----------|
| H | 0.488311  | 3.954711  | -1.852253 |
| C | 1.783728  | 1.989569  | -0.103034 |
| H | 1.577644  | 1.419376  | 0.818373  |
| C | 2.387717  | 3.326050  | 0.305028  |
| C | 3.684660  | 3.715190  | -0.041325 |
| C | 1.611056  | 4.193427  | 1.085504  |
| C | 4.194290  | 4.943729  | 0.386120  |
| H | 4.319736  | 3.066305  | -0.646305 |
| C | 2.116435  | 5.418098  | 1.511249  |
| H | 0.594881  | 3.899472  | 1.363203  |
| C | 3.414073  | 5.797630  | 1.161301  |
| H | 5.210992  | 5.230395  | 0.108577  |
| H | 1.496950  | 6.078282  | 2.122170  |
| H | 3.815380  | 6.756940  | 1.495184  |
| C | 2.667582  | 1.110708  | -0.990647 |
| H | 3.584280  | 0.863576  | -0.424765 |
| H | 2.991597  | 1.684656  | -1.881421 |
| O | 1.975771  | -0.040827 | -1.362266 |
| C | -5.977773 | 0.764471  | -3.144325 |
| H | -5.678591 | 1.395447  | -3.993282 |
| H | -5.860945 | -0.286000 | -3.456591 |
| H | -7.045661 | 0.932149  | -2.946707 |
| C | -5.429241 | 0.820029  | 1.877761  |
| H | -6.526964 | 0.864113  | 1.893808  |
| H | -5.127045 | -0.182053 | 2.222954  |
| H | -5.039940 | 1.546746  | 2.605212  |
| H | -2.959357 | 1.704718  | 1.226933  |
| H | -3.392248 | 1.559302  | -3.063750 |

89

Figure\_S3-1\_9b(Na0Ph)-Cu-allyl / electronic energy: -3597.06856996 a.u. / lowest freq: 15.34 cm<sup>-1</sup>

|    |           |           |           |
|----|-----------|-----------|-----------|
| Na | 0.148120  | -2.350929 | -0.661887 |
| H  | 2.438637  | -3.886514 | 0.418400  |
| H  | 4.437536  | -1.625816 | -2.657585 |
| O  | 2.188175  | -1.934213 | -1.331976 |
| C  | 4.457113  | -2.409826 | -1.896029 |
| C  | 3.271723  | -2.638718 | -1.144621 |
| H  | 6.503884  | -2.941304 | -2.274753 |
| C  | 5.611926  | -3.155530 | -1.678013 |
| C  | 3.330703  | -3.680261 | -0.180384 |
| C  | 5.648755  | -4.168717 | -0.715703 |
| C  | 4.491286  | -4.420599 | 0.026190  |
| H  | 6.559206  | -4.747918 | -0.547636 |
| H  | 4.492260  | -5.208637 | 0.785191  |
| H  | 2.110038  | -1.789209 | 2.251941  |
| H  | -1.683682 | -0.084569 | 3.012140  |
| C  | 0.177417  | -2.763996 | 2.184032  |
| C  | -0.716422 | -0.448477 | 2.624984  |
| H  | 0.009685  | -3.753268 | 1.738460  |
| C  | -0.814296 | -1.836152 | 2.123482  |
| H  | 0.060429  | -0.307140 | 3.395789  |
| B  | -2.112989 | -2.153360 | 1.318568  |
| O  | -3.369101 | -1.737541 | 1.633548  |
| H  | -2.845676 | -0.482203 | -0.927861 |
| O  | -2.073350 | -2.793843 | 0.089938  |
| H  | -2.386052 | -1.604043 | -2.238318 |
| C  | -3.158779 | -1.375665 | -1.489089 |
| H  | -4.906254 | -0.251131 | 0.103283  |
| C  | -3.345234 | -2.575300 | -0.562814 |
| C  | -4.288875 | -2.263960 | 0.657935  |
| C  | -5.353692 | -1.214414 | 0.379956  |
| H  | -4.085231 | -1.134855 | -2.028538 |
| H  | -5.962317 | -1.060989 | 1.282259  |
| H  | -4.158934 | -4.286914 | 1.470992  |
| H  | -5.400718 | -3.251670 | 2.212692  |
| C  | -4.917121 | -3.518031 | 1.262489  |
| H  | -3.003759 | -3.952870 | -2.186413 |
| C  | -3.717784 | -3.812772 | -1.361912 |
| H  | -3.704627 | -4.717295 | -0.741233 |
| H  | -6.020495 | -1.543104 | -0.431111 |
| H  | -5.677701 | -3.946520 | 0.595013  |
| H  | -4.721339 | -3.698819 | -1.797645 |
| H  | 2.106807  | -3.437236 | 2.912827  |
| C  | 1.510733  | -2.517409 | 2.830805  |
| H  | 1.401035  | -2.091228 | 3.843076  |
| C  | 1.280515  | 3.069545  | -2.003442 |
| H  | 1.565108  | 2.605156  | -2.959047 |
| C  | -0.172818 | 3.561404  | -1.995315 |
| H  | -0.276419 | 4.578520  | -1.584882 |
| C  | 0.060095  | 1.792810  | -0.476656 |
| C  | -2.217588 | 2.610963  | -0.829080 |
| C  | -2.678385 | 3.129778  | 0.395038  |
| C  | -3.100884 | 2.109301  | -1.801083 |
| C  | -4.054535 | 3.111730  | 0.641038  |
| C  | -4.470186 | 2.122037  | -1.519756 |
| C  | -4.944329 | 2.613849  | -0.307033 |
| H  | -6.016384 | 2.608530  | -0.098720 |
| Cu | -0.341132 | 0.639697  | 1.032050  |
| N  | 1.273784  | 2.050851  | -0.951347 |
| N  | -0.819266 | 2.595349  | -1.099937 |

|   |           |           |           |
|---|-----------|-----------|-----------|
| H | 2.443780  | -0.610758 | -2.213460 |
| H | -0.629024 | 3.549352  | -2.994037 |
| H | 1.996706  | 3.870578  | -1.771134 |
| C | 2.484707  | 1.372525  | -0.497575 |
| H | 2.139125  | 0.425669  | -0.056505 |
| C | 3.187276  | 2.170139  | 0.586692  |
| C | 4.053990  | 3.229208  | 0.291404  |
| C | 2.928357  | 1.870261  | 1.929919  |
| C | 4.643739  | 3.972204  | 1.314760  |
| H | 4.282158  | 3.482129  | -0.746497 |
| C | 3.515716  | 2.610503  | 2.954124  |
| H | 2.250016  | 1.047192  | 2.174293  |
| C | 4.375475  | 3.666125  | 2.648300  |
| H | 5.320155  | 4.793092  | 1.066340  |
| H | 3.303057  | 2.360630  | 3.995928  |
| H | 4.838980  | 4.246461  | 3.449152  |
| C | 3.374358  | 0.994741  | -1.687423 |
| H | 4.246875  | 0.448944  | -1.277619 |
| H | 3.774104  | 1.901226  | -2.172724 |
| O | 2.681605  | 0.261974  | -2.643836 |
| H | -4.432045 | 3.504641  | 1.588162  |
| H | -5.170862 | 1.726395  | -2.259259 |
| C | -2.592705 | 1.563034  | -3.108381 |
| H | -2.423060 | 2.369586  | -3.840006 |
| H | -1.639450 | 1.031325  | -2.978681 |
| H | -3.320420 | 0.870396  | -3.551477 |
| C | -1.723572 | 3.682246  | 1.419703  |
| H | -1.210134 | 2.868739  | 1.959856  |
| H | -0.940363 | 4.298843  | 0.955650  |
| H | -2.256508 | 4.292551  | 2.160509  |

121

Figure\_S3-1\_AA-9b(NaOPh)-pc(1,6major) / electronic energy: -4439.04439972 a.u. / lowest freq: 11.81 cm-1

|    |           |           |           |
|----|-----------|-----------|-----------|
| C  | 0.935802  | 0.662649  | 4.096427  |
| H  | 0.864348  | -0.263644 | 3.511863  |
| H  | 1.774421  | 0.549899  | 4.802740  |
| H  | 0.016164  | 0.760804  | 4.688880  |
| H  | -2.186641 | 2.294116  | 3.131806  |
| H  | -0.824239 | 0.494303  | 2.195976  |
| C  | -3.343592 | 1.255678  | 1.625382  |
| C  | -1.320480 | -0.152220 | 1.462427  |
| H  | -4.429308 | 1.342863  | 1.524385  |
| C  | -2.754492 | 0.059071  | 1.351389  |
| H  | -1.041122 | -1.206015 | 1.607606  |
| B  | -3.640387 | -1.106185 | 0.827404  |
| O  | -3.319076 | -2.428574 | 0.980336  |
| H  | -5.999906 | -2.321888 | 2.086345  |
| O  | -4.815730 | -0.937629 | 0.134991  |
| H  | -7.190220 | -1.542828 | 1.017057  |
| C  | -6.469790 | -2.369821 | 1.093195  |
| H  | -4.913804 | -4.344408 | 1.873129  |
| C  | -5.430907 | -2.229282 | -0.018341 |
| C  | -4.205742 | -3.202801 | 0.157521  |
| C  | -4.524700 | -4.512495 | 0.861112  |
| H  | -7.020801 | -3.317290 | 1.011525  |
| H  | -3.608805 | -5.114896 | 0.943618  |
| H  | -3.224170 | -2.540841 | -1.674324 |
| H  | -2.515442 | -3.978184 | -0.905258 |
| C  | -3.463342 | -3.476829 | -1.148551 |
| H  | -6.942428 | -1.588843 | -1.417452 |
| C  | -6.104192 | -2.299544 | -1.380336 |
| H  | -5.406396 | -2.044820 | -2.188021 |
| H  | -5.266537 | -5.089106 | 0.288687  |
| H  | -4.044421 | -4.123403 | -1.821250 |
| H  | -6.503026 | -3.308476 | -1.563180 |
| H  | -3.219095 | 3.354563  | 2.137021  |
| C  | -2.591065 | 2.453015  | 2.116391  |
| H  | -1.715261 | 2.656255  | 1.473318  |
| C  | 3.520175  | -1.470835 | 1.434027  |
| H  | 4.429499  | -1.679494 | 0.859947  |
| C  | 3.564871  | -0.069324 | 2.048333  |
| H  | 3.584512  | -0.079463 | 3.147198  |
| C  | 1.673850  | -0.248777 | 0.673083  |
| C  | 1.846144  | 1.792755  | 2.007961  |
| C  | 1.139981  | 1.869738  | 3.219537  |
| C  | 2.129107  | 2.932216  | 1.237629  |
| C  | 0.650881  | 3.119347  | 3.614239  |
| C  | 1.613123  | 4.159904  | 1.660479  |
| C  | 0.869581  | 4.250915  | 2.835200  |
| H  | 0.468412  | 5.215698  | 3.153137  |
| Cu | -0.108214 | 0.185874  | -0.130214 |
| N  | 2.349269  | -1.396078 | 0.551049  |
| N  | 2.316873  | 0.523946  | 1.556278  |
| C  | -1.407678 | 0.718872  | -1.594307 |
| C  | -0.109584 | 0.540838  | -2.206971 |
| H  | 4.309558  | -1.924046 | -1.343211 |
| H  | 4.431739  | 0.508302  | 1.690350  |
| H  | 3.389260  | -2.264822 | 2.186114  |
| H  | -2.074733 | -0.140457 | -1.699392 |
| C  | 0.808072  | 1.636435  | -2.583034 |

|    |           |           |           |
|----|-----------|-----------|-----------|
| C  | 0.194735  | -0.765315 | -2.821302 |
| O  | 0.274305  | 2.851114  | -2.466395 |
| O  | 1.954345  | 1.500121  | -2.977503 |
| O  | 1.188576  | -1.047433 | -3.468839 |
| O  | -0.753022 | -1.690423 | -2.611853 |
| C  | -0.547059 | -2.949997 | -3.235108 |
| H  | -0.561045 | -2.846983 | -4.328867 |
| H  | -1.368705 | -3.592371 | -2.905353 |
| H  | 0.418269  | -3.382313 | -2.937647 |
| C  | 1.061338  | 3.958218  | -2.883186 |
| H  | 2.030912  | 3.969576  | -2.371169 |
| H  | 0.484167  | 4.852409  | -2.624705 |
| H  | 1.231005  | 3.920222  | -3.968208 |
| C  | 1.848957  | -2.554923 | -0.167944 |
| H  | 1.246918  | -2.160791 | -0.999020 |
| C  | 0.939627  | -3.440316 | 0.678929  |
| C  | 0.294178  | -4.532599 | 0.083524  |
| C  | 0.694025  | -3.186428 | 2.031108  |
| C  | -0.559232 | -5.350447 | 0.820149  |
| H  | 0.446798  | -4.746057 | -0.976860 |
| C  | -0.161408 | -4.001677 | 2.772297  |
| H  | 1.155670  | -2.327973 | 2.520056  |
| C  | -0.788590 | -5.089798 | 2.171145  |
| H  | -1.052885 | -6.194075 | 0.332336  |
| H  | -0.341136 | -3.777035 | 3.825588  |
| H  | -1.460374 | -5.727062 | 2.749833  |
| C  | 3.006411  | -3.348921 | -0.801707 |
| H  | 2.573647  | -4.227693 | -1.301826 |
| H  | 3.655231  | -3.745191 | 0.003201  |
| O  | 3.723883  | -2.627575 | -1.747453 |
| C  | -2.087135 | 1.953321  | -1.287873 |
| H  | -1.498398 | 2.865397  | -1.223821 |
| C  | -3.420814 | 1.981716  | -1.045481 |
| H  | -3.991614 | 1.054306  | -1.141280 |
| C  | -4.214289 | 3.179807  | -0.738899 |
| C  | -5.602262 | 3.047185  | -0.566347 |
| C  | -3.649636 | 4.458368  | -0.592132 |
| C  | -6.398276 | 4.146848  | -0.255517 |
| H  | -6.054556 | 2.056994  | -0.666573 |
| C  | -4.444375 | 5.558454  | -0.282306 |
| H  | -2.573857 | 4.598421  | -0.714263 |
| C  | -5.822169 | 5.409381  | -0.111061 |
| H  | -7.474500 | 4.016612  | -0.121376 |
| H  | -3.983390 | 6.542509  | -0.169871 |
| H  | -6.442738 | 6.273848  | 0.135193  |
| H  | 1.811761  | 5.056454  | 1.068158  |
| H  | 0.084734  | 3.199451  | 4.545330  |
| C  | 3.011452  | 2.823961  | 0.027591  |
| O  | 4.924136  | -0.442226 | -1.264187 |
| Na | 3.292187  | -0.360410 | -2.790196 |
| C  | 5.947197  | 0.029438  | -0.621908 |
| C  | 6.287664  | 1.410149  | -0.667365 |
| C  | 6.784574  | -0.795229 | 0.180192  |
| C  | 7.355374  | 1.924095  | 0.062036  |
| H  | 5.683596  | 2.065593  | -1.300869 |
| C  | 7.849334  | -0.268169 | 0.906644  |
| H  | 6.582117  | -1.870528 | 0.205643  |
| C  | 8.145853  | 1.096950  | 0.866164  |
| H  | 7.576312  | 2.994016  | 0.000056  |
| H  | 8.464012  | -0.938846 | 1.514702  |
| H  | 8.981496  | 1.505500  | 1.438206  |
| H  | 3.162910  | 3.806432  | -0.438491 |
| H  | 2.605867  | 2.137149  | -0.727132 |
| H  | 4.000990  | 2.427732  | 0.301084  |

121

Figure\_S3-1\_AA-9b(NaOPh)-ts(1,6major) / electronic energy: -4439.04225300 a.u. / lowest freq: -302.37 cm<sup>-1</sup>

|   |           |           |          |
|---|-----------|-----------|----------|
| C | 0.994657  | 0.629022  | 4.152905 |
| H | 0.816261  | -0.280969 | 3.564092 |
| H | 1.904888  | 0.462704  | 4.751414 |
| H | 0.157717  | 0.752953  | 4.852850 |
| H | -2.218728 | 2.280131  | 3.090642 |
| H | -0.785160 | 0.492325  | 2.170977 |
| C | -3.262119 | 1.334340  | 1.456737 |
| C | -1.329610 | -0.183510 | 1.503823 |
| H | -4.351476 | 1.420712  | 1.443181 |
| C | -2.712988 | 0.068601  | 1.315025 |
| H | -1.039590 | -1.237116 | 1.603453 |
| B | -3.618360 | -1.095557 | 0.817808 |
| O | -3.314717 | -2.417207 | 0.995351 |
| H | -5.983990 | -2.257156 | 2.112316 |
| O | -4.794050 | -0.917791 | 0.132915 |
| H | -7.170777 | -1.476924 | 1.039672 |
| C | -6.461358 | -2.312633 | 1.123140 |
| H | -4.926709 | -4.301788 | 1.919199 |
| C | -5.428985 | -2.204076 | 0.002360 |
| C | -4.215837 | -3.191005 | 0.184963 |
| C | -4.548176 | -4.487256 | 0.906230 |
| H | -7.026107 | -3.253291 | 1.059066 |
| H | -3.640887 | -5.102642 | 0.987943 |

|    |           |           |           |
|----|-----------|-----------|-----------|
| H  | -3.234633 | -2.560337 | -1.657250 |
| H  | -2.540355 | -3.998836 | -0.877860 |
| C  | -3.482985 | -3.487878 | -1.120908 |
| H  | -6.941358 | -1.564349 | -1.395553 |
| C  | -6.111421 | -2.284360 | -1.354170 |
| H  | -5.415593 | -2.048775 | -2.169261 |
| H  | -5.303295 | -5.058697 | 0.346199  |
| H  | -4.075709 | -4.133714 | -1.784018 |
| H  | -6.523173 | -3.290888 | -1.520711 |
| H  | -3.047810 | 3.418039  | 2.000905  |
| C  | -2.484748 | 2.475578  | 2.036996  |
| H  | -1.530048 | 2.621600  | 1.501572  |
| C  | 3.525684  | -1.464785 | 1.445159  |
| H  | 4.439255  | -1.676503 | 0.879275  |
| C  | 3.563752  | -0.059402 | 2.049284  |
| H  | 3.613945  | -0.062732 | 3.146650  |
| C  | 1.665140  | -0.263362 | 0.689854  |
| C  | 1.807661  | 1.771641  | 2.036639  |
| C  | 1.146095  | 1.841934  | 3.273955  |
| C  | 2.021140  | 2.908436  | 1.241402  |
| C  | 0.645184  | 3.082615  | 3.680133  |
| C  | 1.492873  | 4.127062  | 1.676007  |
| C  | 0.803203  | 4.212254  | 2.883192  |
| H  | 0.392937  | 5.170019  | 3.210406  |
| Cu | -0.099482 | 0.161163  | -0.143852 |
| N  | 2.358950  | -1.398161 | 0.556361  |
| N  | 2.294812  | 0.510423  | 1.582081  |
| C  | -1.421790 | 0.716156  | -1.636072 |
| C  | -0.126193 | 0.505968  | -2.260099 |
| H  | 4.317977  | -1.911589 | -1.328775 |
| H  | 4.410994  | 0.529868  | 1.663904  |
| H  | 3.391423  | -2.253427 | 2.202690  |
| H  | -2.099185 | -0.138345 | -1.715683 |
| C  | 0.782572  | 1.583898  | -2.679487 |
| C  | 0.163637  | -0.813798 | -2.832815 |
| O  | 0.261455  | 2.807221  | -2.553427 |
| O  | 1.913349  | 1.442254  | -3.120644 |
| O  | 1.175626  | -1.140518 | -3.433698 |
| O  | -0.814574 | -1.716183 | -2.640531 |
| C  | -0.612902 | -2.988096 | -3.236977 |
| H  | -0.576527 | -2.902059 | -4.331834 |
| H  | -1.463020 | -3.607051 | -2.935388 |
| H  | 0.327652  | -3.439978 | -2.893055 |
| C  | 1.038131  | 3.899272  | -3.021440 |
| H  | 2.026087  | 3.916713  | -2.544798 |
| H  | 0.475833  | 4.802864  | -2.762013 |
| H  | 1.170927  | 3.838726  | -4.110699 |
| C  | 1.868628  | -2.559587 | -0.166404 |
| H  | 1.278385  | -2.168860 | -1.008231 |
| C  | 0.950653  | -3.442312 | 0.674230  |
| C  | 0.299804  | -4.527999 | 0.072922  |
| C  | 0.702516  | -3.192569 | 2.027029  |
| C  | -0.563666 | -5.341404 | 0.802888  |
| H  | 0.456067  | -4.739028 | -0.987382 |
| C  | -0.163054 | -4.003211 | 2.761591  |
| H  | 1.170684  | -2.341249 | 2.522359  |
| C  | -0.797802 | -5.083012 | 2.153454  |
| H  | -1.061797 | -6.179498 | 0.310090  |
| H  | -0.344391 | -3.781576 | 3.815261  |
| H  | -1.477473 | -5.716615 | 2.726922  |
| C  | 3.033926  | -3.354156 | -0.784286 |
| H  | 2.607026  | -4.236832 | -1.282740 |
| H  | 3.676342  | -3.743843 | 0.029176  |
| O  | 3.757611  | -2.637747 | -1.728897 |
| C  | -2.033507 | 1.924162  | -1.230037 |
| H  | -1.437210 | 2.833493  | -1.208038 |
| C  | -3.353814 | 1.956174  | -0.820294 |
| H  | -3.963969 | 1.067412  | -0.993847 |
| C  | -4.121858 | 3.197283  | -0.612268 |
| C  | -5.519929 | 3.118415  | -0.496253 |
| C  | -3.523054 | 4.464126  | -0.513055 |
| C  | -6.292343 | 4.258448  | -0.289256 |
| H  | -6.000857 | 2.138745  | -0.564629 |
| C  | -4.294551 | 5.605130  | -0.305701 |
| H  | -2.438676 | 4.564035  | -0.590710 |
| C  | -5.682500 | 5.509794  | -0.191774 |
| H  | -7.377515 | 4.168661  | -0.200933 |
| H  | -3.806282 | 6.579452  | -0.229348 |
| H  | -6.284090 | 6.406448  | -0.027802 |
| H  | 1.638670  | 5.021331  | 1.065270  |
| H  | 0.114459  | 3.157263  | 4.632228  |
| C  | 2.834696  | 2.805511  | -0.016249 |
| O  | 4.891885  | -0.411924 | -1.258193 |
| Na | 3.260473  | -0.381258 | -2.788678 |
| C  | 5.909448  | 0.069296  | -0.614765 |
| C  | 6.224501  | 1.456656  | -0.640249 |
| C  | 6.765668  | -0.752305 | 0.170791  |
| C  | 7.285932  | 1.978492  | 0.092906  |
| H  | 5.607582  | 2.110668  | -1.262807 |

|   |          |           |           |
|---|----------|-----------|-----------|
| C | 7.823504 | -0.217304 | 0.901258  |
| H | 6.582471 | -1.831360 | 0.179632  |
| C | 8.094641 | 1.153607  | 0.881006  |
| H | 7.487648 | 3.052991  | 0.046521  |
| H | 8.452672 | -0.885961 | 1.496591  |
| H | 8.925115 | 1.568487  | 1.456025  |
| H | 2.967128 | 3.790755  | -0.481698 |
| H | 2.375484 | 2.130399  | -0.750216 |
| H | 3.832566 | 2.393282  | 0.194920  |

121

Figure\_S3-1\_AA-9b(Na0Ph)-prod(1,6major) / electronic energy: -4439.09912432 a.u. / lowest freq: 18.30 cm-1

|    |           |           |           |
|----|-----------|-----------|-----------|
| C  | 1.121741  | -0.022225 | 4.690419  |
| H  | 1.086055  | -0.854656 | 3.974262  |
| H  | 2.113809  | -0.044683 | 5.169536  |
| H  | 0.374702  | -0.203594 | 5.475245  |
| H  | -3.208936 | 1.459593  | 3.533476  |
| H  | -1.332732 | 0.065433  | 3.278220  |
| C  | -3.456389 | 0.657980  | 1.520609  |
| C  | -1.563101 | -0.706616 | 2.538937  |
| H  | -4.481397 | 0.321057  | 1.752509  |
| C  | -2.568926 | -0.572727 | 1.626881  |
| H  | -1.051757 | -1.665203 | 2.659133  |
| B  | -2.889821 | -1.835167 | 0.747804  |
| O  | -2.023517 | -2.882297 | 0.634448  |
| H  | -4.488387 | -4.205682 | 1.471043  |
| O  | -4.032286 | -2.003535 | 0.024553  |
| H  | -5.905957 | -3.731561 | 0.504386  |
| C  | -4.905409 | -4.183741 | 0.453728  |
| H  | -2.637557 | -5.439728 | 0.938072  |
| C  | -4.033691 | -3.355219 | -0.487147 |
| C  | -2.507594 | -3.740976 | -0.419571 |
| C  | -2.230215 | -5.187990 | -0.049029 |
| H  | -5.009098 | -5.217567 | 0.095982  |
| H  | -1.145043 | -5.357642 | -0.022726 |
| H  | -1.871295 | -2.309271 | -1.947182 |
| H  | -0.663689 | -3.531243 | -1.492380 |
| C  | -1.733611 | -3.366819 | -1.680103 |
| H  | -5.685644 | -3.066333 | -1.841231 |
| C  | -4.623317 | -3.344984 | -1.887926 |
| H  | -4.107913 | -2.624875 | -2.535880 |
| H  | -2.669100 | -5.866161 | -0.795901 |
| H  | -2.031802 | -3.989565 | -2.535121 |
| H  | -4.550960 | -4.343461 | -2.343710 |
| H  | -3.761353 | 2.645358  | 2.331633  |
| C  | -3.098412 | 1.782114  | 2.487667  |
| H  | -2.060078 | 2.127812  | 2.356291  |
| C  | 3.388225  | -1.126704 | 1.167169  |
| H  | 4.226614  | -1.034790 | 0.463883  |
| C  | 3.284596  | 0.090642  | 2.087462  |
| H  | 3.529802  | -0.138373 | 3.133728  |
| C  | 1.245811  | -0.213897 | 0.967479  |
| C  | 1.274208  | 1.518262  | 2.680895  |
| C  | 0.881523  | 1.299993  | 4.011904  |
| C  | 1.087801  | 2.755464  | 2.042260  |
| C  | 0.255038  | 2.348969  | 4.692925  |
| C  | 0.452829  | 3.776399  | 2.755395  |
| C  | 0.036262  | 3.574341  | 4.068881  |
| H  | -0.461553 | 4.380646  | 4.612037  |
| Cu | -0.691844 | 0.042937  | 0.618147  |
| N  | 2.098689  | -1.108193 | 0.467231  |
| N  | 1.871548  | 0.454683  | 1.947099  |
| C  | -1.448489 | 0.946872  | -1.527184 |
| C  | -0.346757 | 1.423951  | -2.328493 |
| H  | 3.328754  | -0.187232 | -1.616525 |
| H  | 3.925692  | 0.919509  | 1.749359  |
| H  | 3.499273  | -2.074025 | 1.719669  |
| H  | -1.943249 | 0.056263  | -1.934875 |
| C  | 0.096140  | 2.800278  | -2.337942 |
| C  | 0.254010  | 0.522120  | -3.282086 |
| O  | -0.758211 | 3.660860  | -1.739348 |
| O  | 1.131080  | 3.240510  | -2.833274 |
| O  | 1.108702  | 0.789301  | -4.122038 |
| O  | -0.230163 | -0.741905 | -3.203282 |
| C  | 0.288298  | -1.669262 | -4.136944 |
| H  | -0.025921 | -1.420784 | -5.161834 |
| H  | -0.119229 | -2.647476 | -3.855969 |
| H  | 1.385317  | -1.685029 | -4.096501 |
| C  | -0.400062 | 5.028083  | -1.732062 |
| H  | 0.586412  | 5.181690  | -1.272697 |
| H  | -1.170027 | 5.540430  | -1.142713 |
| H  | -0.377455 | 5.439942  | -2.751563 |
| C  | 1.760258  | -2.116272 | -0.519414 |
| H  | 0.806433  | -1.786637 | -0.965780 |
| C  | 1.567198  | -3.485839 | 0.132427  |
| C  | 1.837412  | -4.680368 | -0.546988 |
| C  | 1.085461  | -3.572912 | 1.444197  |
| C  | 1.644469  | -5.917085 | 0.070736  |
| H  | 2.206831  | -4.666191 | -1.573088 |
| C  | 0.893846  | -4.803579 | 2.065623  |

|    |           |           |           |
|----|-----------|-----------|-----------|
| H  | 0.857013  | -2.656742 | 1.990116  |
| C  | 1.177372  | -5.985082 | 1.381393  |
| H  | 1.866619  | -6.833755 | -0.479954 |
| H  | 0.515708  | -4.838617 | 3.089630  |
| H  | 1.030106  | -6.952836 | 1.865316  |
| C  | 2.803891  | -2.118973 | -1.647266 |
| H  | 2.465813  | -2.820652 | -2.423928 |
| H  | 3.760472  | -2.524299 | -1.256873 |
| O  | 2.960536  | -0.878523 | -2.242498 |
| C  | -2.023345 | 1.472023  | -0.392653 |
| H  | -1.609388 | 2.395841  | 0.022089  |
| C  | -3.431003 | 1.110623  | 0.035848  |
| H  | -3.740115 | 0.235213  | -0.556679 |
| C  | -4.454863 | 2.199099  | -0.264956 |
| C  | -5.810353 | 1.962062  | 0.009892  |
| C  | -4.102953 | 3.428248  | -0.833134 |
| C  | -6.779321 | 2.926616  | -0.254253 |
| H  | -6.115796 | 0.999513  | 0.429105  |
| C  | -5.072642 | 4.398098  | -1.098707 |
| H  | -3.061225 | 3.624760  | -1.092058 |
| C  | -6.412641 | 4.155577  | -0.806633 |
| H  | -7.828690 | 2.716567  | -0.033959 |
| H  | -4.773428 | 5.349837  | -1.544510 |
| H  | -7.170201 | 4.914370  | -1.015187 |
| H  | 0.289564  | 4.742771  | 2.272124  |
| H  | -0.071396 | 2.195783  | 5.724496  |
| C  | 1.538562  | 2.950401  | 0.624423  |
| O  | 3.893795  | 1.206610  | -1.056986 |
| Na | 2.896780  | 1.781163  | -3.013738 |
| C  | 5.135827  | 1.181190  | -0.670939 |
| C  | 5.673417  | 2.178828  | 0.187562  |
| C  | 6.023191  | 0.138667  | -1.060890 |
| C  | 6.993931  | 2.126742  | 0.625477  |
| H  | 5.016408  | 2.996030  | 0.499078  |
| C  | 7.341385  | 0.099454  | -0.615307 |
| H  | 5.639172  | -0.636656 | -1.730788 |
| C  | 7.845198  | 1.088706  | 0.234052  |
| H  | 7.367110  | 2.912753  | 1.289086  |
| H  | 7.990373  | -0.719920 | -0.939189 |
| H  | 8.879620  | 1.052622  | 0.582480  |
| H  | 1.566587  | 4.015940  | 0.363351  |
| H  | 0.843227  | 2.446811  | -0.060730 |
| H  | 2.520876  | 2.499780  | 0.419449  |

121

Figure\_S3-1\_AA-9d(NaO<sub>Ph</sub>)-prod(1,6minor) / electronic energy: -4439.09249888 a.u. / lowest freq: 11.32 cm<sup>-1</sup>

|    |           |           |           |
|----|-----------|-----------|-----------|
| H  | -5.295853 | -3.015072 | -2.549329 |
| H  | -6.703674 | -2.031675 | -2.081627 |
| C  | -6.041133 | -2.846888 | -1.758166 |
| H  | -6.643478 | -3.759076 | -1.645693 |
| H  | -4.422769 | -4.910564 | -1.606698 |
| B  | -3.359980 | -1.530207 | -0.943810 |
| O  | -4.666810 | -1.220665 | -0.682133 |
| C  | -4.368367 | -4.858694 | -0.512131 |
| C  | -5.374540 | -2.452573 | -0.441058 |
| O  | -3.066183 | -2.837957 | -0.669922 |
| H  | -5.278031 | -5.312247 | -0.091537 |
| H  | -3.505617 | -5.456775 | -0.185033 |
| C  | -4.210352 | -3.427809 | -0.021764 |
| H  | -7.187873 | -1.519471 | 0.254646  |
| C  | -6.426374 | -2.217307 | 0.631253  |
| H  | -6.927488 | -3.160716 | 0.893543  |
| H  | -5.988638 | -1.785353 | 1.539954  |
| C  | -3.934205 | -3.417136 | 1.479404  |
| H  | -3.022659 | -3.996999 | 1.677313  |
| H  | -3.773464 | -2.396784 | 1.857017  |
| H  | -4.758368 | -3.876391 | 2.042915  |
| C  | -2.335445 | -0.503845 | -1.531586 |
| C  | -2.690473 | 0.970605  | -1.510769 |
| H  | -3.690151 | 1.053291  | -1.974025 |
| H  | -1.612410 | 1.505441  | -3.324272 |
| H  | -0.730181 | 1.861927  | -1.822110 |
| C  | -1.727120 | 1.855440  | -2.287597 |
| H  | -2.079425 | 2.895167  | -2.326294 |
| H  | -1.008923 | -2.070338 | -2.076446 |
| C  | -1.212714 | -0.995728 | -2.081910 |
| H  | -0.466896 | -0.366858 | -2.576833 |
| C  | 3.718753  | 1.240765  | -1.726168 |
| H  | 4.619650  | 1.281111  | -1.099664 |
| C  | 3.492995  | -0.163298 | -2.291076 |
| H  | 3.220068  | -0.138516 | -3.357941 |
| C  | 1.805684  | 0.333231  | -0.747243 |
| C  | 1.878412  | -1.959970 | -1.548944 |
| C  | 1.968489  | -2.685499 | -2.737550 |
| C  | 1.271075  | -2.533616 | -0.429168 |
| C  | 1.406195  | -3.962849 | -2.831555 |
| C  | 0.678236  | -3.792604 | -0.510686 |
| C  | 0.749278  | -4.495334 | -1.717793 |
| H  | 0.287667  | -5.484018 | -1.789974 |
| Cu | 0.184783  | 0.174975  | 0.311288  |

|    |           |           |           |
|----|-----------|-----------|-----------|
| N  | 2.521110  | 1.443363  | -0.905977 |
| N  | 2.366793  | -0.641632 | -1.484140 |
| C  | -1.402936 | 0.345936  | 1.652467  |
| C  | -0.257955 | 0.065524  | 2.522379  |
| H  | 4.033332  | 1.550779  | 1.308303  |
| H  | 4.365627  | -0.818464 | -2.158263 |
| H  | 3.804399  | 2.008163  | -2.507809 |
| H  | -2.119882 | -0.480877 | 1.606772  |
| C  | -0.167841 | -1.261056 | 3.129333  |
| C  | 0.643421  | 1.071608  | 3.052695  |
| O  | -1.347965 | -1.901969 | 3.195233  |
| O  | 0.844535  | -1.792259 | 3.570098  |
| O  | 1.593097  | 0.878410  | 3.804858  |
| O  | 0.339514  | 2.328273  | 2.673102  |
| C  | 1.167614  | 3.361704  | 3.190575  |
| H  | 1.107962  | 3.398636  | 4.287358  |
| H  | 0.773772  | 4.295262  | 2.772024  |
| H  | 2.213237  | 3.205803  | 2.887082  |
| C  | -1.380163 | -3.132603 | 3.898148  |
| H  | -0.854924 | -3.925150 | 3.347640  |
| H  | -2.438468 | -3.394537 | 4.003317  |
| H  | -0.920718 | -3.026802 | 4.890240  |
| C  | 2.229900  | 2.691149  | -0.223627 |
| H  | 1.560588  | 2.428925  | 0.608962  |
| C  | 1.486233  | 3.687323  | -1.102135 |
| C  | 0.917180  | 4.821151  | -0.506764 |
| C  | 1.304415  | 3.497670  | -2.473995 |
| C  | 0.190140  | 5.739353  | -1.260150 |
| H  | 1.030748  | 4.982239  | 0.568047  |
| C  | 0.578811  | 4.416458  | -3.233143 |
| H  | 1.700738  | 2.604851  | -2.959941 |
| C  | 0.017489  | 5.539595  | -2.630480 |
| H  | -0.252073 | 6.610742  | -0.772239 |
| H  | 0.440876  | 4.242396  | -4.302389 |
| H  | -0.558992 | 6.252995  | -3.222937 |
| C  | 3.503295  | 3.279391  | 0.405984  |
| H  | 3.251958  | 4.282897  | 0.784388  |
| H  | 4.254502  | 3.439977  | -0.395000 |
| O  | 4.003420  | 2.538343  | 1.467318  |
| C  | -1.658522 | 1.410932  | 0.823697  |
| H  | -1.047641 | 2.312421  | 0.890493  |
| C  | -2.905112 | 1.450001  | -0.030032 |
| H  | -3.618489 | 0.731061  | 0.399343  |
| C  | -3.597705 | 2.801584  | -0.000590 |
| C  | -4.996706 | 2.851721  | 0.045711  |
| C  | -2.895250 | 4.012091  | -0.064486 |
| C  | -5.675846 | 4.069581  | 0.033230  |
| H  | -5.559954 | 1.915007  | 0.090268  |
| C  | -3.570014 | 5.232109  | -0.081073 |
| H  | -1.804379 | 4.013485  | -0.117376 |
| C  | -4.963540 | 5.267180  | -0.029760 |
| H  | -6.767537 | 4.082677  | 0.076312  |
| H  | -3.000102 | 6.162802  | -0.135957 |
| H  | -5.491557 | 6.223319  | -0.038462 |
| C  | -0.055433 | -4.342199 | 0.679933  |
| H  | -1.046384 | -3.866172 | 0.746016  |
| H  | -0.203845 | -5.428298 | 0.606540  |
| H  | 0.487367  | -4.121788 | 1.610692  |
| C  | 1.518112  | -4.747206 | -4.112668 |
| H  | 0.746277  | -5.526606 | -4.175105 |
| H  | 1.422715  | -4.094454 | -4.992277 |
| H  | 2.499514  | -5.243809 | -4.178918 |
| H  | 2.453858  | -2.248658 | -3.612097 |
| H  | 1.266871  | -1.993193 | 0.521404  |
| O  | 4.079296  | -0.082018 | 1.404883  |
| Na | 2.928510  | -0.850287 | 3.138066  |
| C  | 4.936537  | -0.774202 | 0.716039  |
| C  | 4.716621  | -2.144428 | 0.405563  |
| C  | 6.139219  | -0.203133 | 0.213155  |
| C  | 5.603740  | -2.866575 | -0.386123 |
| H  | 3.804835  | -2.619498 | 0.777659  |
| C  | 7.017045  | -0.934273 | -0.581845 |
| H  | 6.349647  | 0.841637  | 0.461102  |
| C  | 6.760196  | -2.271800 | -0.900441 |
| H  | 5.383960  | -3.914264 | -0.612654 |
| H  | 7.923017  | -0.451037 | -0.960149 |
| H  | 7.450640  | -2.840858 | -1.526540 |

121

Figure\_S3-1\_AA-9d(NaOPh)-ts(1,6minor) / electronic energy: -4439.04244814 a.u. / lowest freq: -345.54 cm<sup>-1</sup>

|   |          |          |           |
|---|----------|----------|-----------|
| H | 3.639728 | 4.266447 | -2.509121 |
| H | 5.388690 | 3.936274 | -2.539873 |
| C | 4.570082 | 4.339701 | -1.927262 |
| H | 4.776222 | 5.400836 | -1.728982 |
| H | 2.364214 | 5.468895 | -1.006152 |
| B | 2.946946 | 1.894371 | -0.984115 |
| O | 4.293598 | 2.156885 | -1.001008 |
| C | 2.635293 | 5.247525 | 0.033642  |
| C | 4.477675 | 3.534750 | -0.631232 |
| O | 2.228194 | 2.907443 | -0.407684 |



|    |           |           |           |
|----|-----------|-----------|-----------|
| H  | 3.388991  | 5.976410  | 0.366474  |
| H  | 1.738813  | 5.376955  | 0.653905  |
| C  | 3.165161  | 3.830546  | 0.181425  |
| H  | 6.626681  | 3.451917  | -0.482954 |
| C  | 5.765733  | 3.668006  | 0.165820  |
| H  | 5.877723  | 4.691673  | 0.552952  |
| H  | 5.792510  | 2.967929  | 1.010573  |
| C  | 3.287985  | 3.458197  | 1.657553  |
| H  | 2.289341  | 3.473404  | 2.113079  |
| H  | 3.696833  | 2.444975  | 1.785362  |
| H  | 3.930670  | 4.164046  | 2.201901  |
| C  | 2.344424  | 0.558122  | -1.513129 |
| C  | 3.244296  | -0.471752 | -1.760560 |
| H  | 4.297714  | -0.202782 | -1.866445 |
| H  | 2.376696  | -1.689252 | -3.316210 |
| H  | 2.021748  | -2.231701 | -1.672481 |
| C  | 2.809661  | -1.795115 | -2.305954 |
| H  | 3.640762  | -2.510413 | -2.366520 |
| H  | 0.349399  | 1.306102  | -1.583391 |
| C  | 0.940349  | 0.383521  | -1.566859 |
| H  | 0.547632  | -0.401635 | -2.226292 |
| C  | -3.614220 | -1.436651 | -1.707166 |
| H  | -4.558500 | -1.603409 | -1.169716 |
| C  | -3.475933 | 0.016005  | -2.162540 |
| H  | -3.158367 | 0.086578  | -3.214195 |
| C  | -1.815917 | -0.459907 | -0.576082 |
| C  | -2.076995 | 1.881767  | -1.217845 |
| C  | -2.179560 | 2.678147  | -2.359662 |
| C  | -1.637515 | 2.439404  | -0.015250 |
| C  | -1.811119 | 4.026238  | -2.319131 |
| C  | -1.257322 | 3.780004  | 0.042553  |
| C  | -1.345121 | 4.560160  | -1.114540 |
| H  | -1.054752 | 5.613692  | -1.071678 |
| Cu | 0.021547  | -0.275248 | 0.211713  |
| N  | -2.471127 | -1.596063 | -0.805778 |
| N  | -2.420161 | 0.516994  | -1.277159 |
| C  | 1.619020  | -0.416432 | 1.536495  |
| C  | 0.388120  | -0.614149 | 2.281369  |
| H  | -4.254887 | -1.851371 | 1.232830  |
| H  | -4.400194 | 0.594738  | -2.026733 |
| H  | -3.551685 | -2.148288 | -2.542100 |
| H  | 1.990119  | 0.612563  | 1.576943  |
| C  | -0.154234 | 0.525396  | 3.047909  |
| C  | -0.166797 | -1.917443 | 2.653295  |
| O  | 0.746251  | 1.487446  | 3.282294  |
| O  | -1.293425 | 0.625514  | 3.473233  |
| O  | -1.125458 | -2.114787 | 3.383925  |
| O  | 0.481878  | -2.958188 | 2.105610  |
| C  | 0.028763  | -4.260130 | 2.446375  |
| H  | 0.169204  | -4.451895 | 3.518867  |
| H  | 0.636610  | -4.953092 | 1.854504  |
| H  | -1.034509 | -4.386019 | 2.200285  |
| C  | 0.350759  | 2.533149  | 4.158963  |
| H  | -0.601945 | 2.977477  | 3.847655  |
| H  | 1.149643  | 3.281838  | 4.124912  |
| H  | 0.245316  | 2.147352  | 5.183117  |
| C  | -2.145968 | -2.875864 | -0.191980 |
| H  | -1.433247 | -2.633400 | 0.604049  |
| C  | -1.450638 | -3.815921 | -1.160249 |
| C  | -2.151766 | -4.579109 | -2.102145 |
| C  | -0.055575 | -3.918105 | -1.118897 |
| C  | -1.469672 | -5.416331 | -2.985435 |
| H  | -3.241900 | -4.530999 | -2.153245 |
| C  | 0.628323  | -4.755514 | -1.998085 |
| H  | 0.498624  | -3.331243 | -0.381614 |
| C  | -0.078822 | -5.507119 | -2.936148 |
| H  | -2.031277 | -6.004778 | -3.714209 |
| H  | 1.717787  | -4.819200 | -1.949024 |
| H  | 0.453548  | -6.164963 | -3.626338 |
| C  | -3.373630 | -3.498926 | 0.487793  |
| H  | -3.059163 | -4.474046 | 0.893392  |
| H  | -4.154179 | -3.719565 | -0.265879 |
| O  | -3.872841 | -2.729916 | 1.530714  |
| C  | 2.534770  | -1.365870 | 1.032272  |
| H  | 2.267257  | -2.418633 | 1.073708  |
| C  | 3.740545  | -0.992813 | 0.458348  |
| H  | 4.077791  | 0.036735  | 0.598278  |
| C  | 4.826988  | -1.945844 | 0.159574  |
| C  | 6.120854  | -1.451193 | -0.074036 |
| C  | 4.627918  | -3.334162 | 0.081078  |
| C  | 7.177623  | -2.307834 | -0.371284 |
| H  | 6.291329  | -0.371991 | -0.026902 |
| C  | 5.684061  | -4.191939 | -0.217170 |
| H  | 3.633555  | -3.754841 | 0.244418  |
| C  | 6.964399  | -3.684816 | -0.444924 |
| H  | 8.174285  | -1.896599 | -0.547198 |
| H  | 5.504742  | -5.268034 | -0.275536 |
| H  | 7.790074  | -4.359898 | -0.680124 |
| C  | -0.776633 | 4.361166  | 1.342263  |

|    |           |           |           |
|----|-----------|-----------|-----------|
| H  | 0.153973  | 3.863921  | 1.652413  |
| H  | -0.582673 | 5.439156  | 1.259246  |
| H  | -1.519812 | 4.209758  | 2.139606  |
| C  | -1.892147 | 4.867174  | -3.566459 |
| H  | -1.725800 | 5.930771  | -3.347882 |
| H  | -1.133156 | 4.551414  | -4.299404 |
| H  | -2.874483 | 4.764445  | -4.051188 |
| H  | -2.532390 | 2.248215  | -3.298760 |
| H  | -1.625997 | 1.825902  | 0.889153  |
| O  | -4.504684 | -0.277146 | 1.383540  |
| Na | -3.012642 | -0.835028 | 2.941519  |
| C  | -5.288857 | 0.439548  | 0.638436  |
| C  | -5.075086 | 1.830932  | 0.443259  |
| C  | -6.396510 | -0.128864 | -0.050101 |
| C  | -5.871997 | 2.577126  | -0.418438 |
| H  | -4.236909 | 2.300536  | 0.963436  |
| C  | -7.188017 | 0.628250  | -0.909648 |
| H  | -6.607399 | -1.191597 | 0.105874  |
| C  | -6.933041 | 1.987567  | -1.114437 |
| H  | -5.655926 | 3.640806  | -0.556725 |
| H  | -8.022943 | 0.147865  | -1.429036 |
| H  | -7.554034 | 2.577573  | -1.791891 |

121

Figure\_S3-1\_AA-9d(NaOPh)-pc(1,6minor) / electronic energy: -4439.04673704 a.u. / lowest freq: 15.40 cm-1

|    |           |           |           |
|----|-----------|-----------|-----------|
| H  | 3.541034  | 4.119440  | -2.668949 |
| H  | 5.300121  | 3.851487  | -2.706432 |
| C  | 4.470010  | 4.224608  | -2.089911 |
| H  | 4.639563  | 5.291983  | -1.890142 |
| H  | 2.226451  | 5.265610  | -1.170611 |
| B  | 2.934886  | 1.714420  | -1.138813 |
| O  | 4.272742  | 2.031683  | -1.167114 |
| C  | 2.505869  | 5.059043  | -0.130078 |
| C  | 4.409814  | 3.412629  | -0.796076 |
| O  | 2.188440  | 2.704983  | -0.553582 |
| H  | 3.228823  | 5.819074  | 0.201548  |
| H  | 1.602534  | 5.152727  | 0.486790  |
| C  | 3.090801  | 3.664093  | 0.023303  |
| H  | 6.561426  | 3.399370  | -0.654413 |
| C  | 5.695890  | 3.589398  | -0.003505 |
| H  | 5.776701  | 4.616785  | 0.381728  |
| H  | 5.747729  | 2.892395  | 0.842888  |
| C  | 3.233781  | 3.310942  | 1.503302  |
| H  | 2.235150  | 3.272154  | 1.959415  |
| H  | 3.698107  | 2.323384  | 1.640226  |
| H  | 3.837521  | 4.054109  | 2.042682  |
| C  | 2.357343  | 0.356880  | -1.633457 |
| C  | 3.264586  | -0.591883 | -1.986421 |
| H  | 4.322353  | -0.314622 | -2.007503 |
| H  | 2.141952  | -2.074354 | -3.101730 |
| H  | 2.508454  | -2.514341 | -1.430379 |
| C  | 2.920198  | -2.007786 | -2.322628 |
| H  | 3.796492  | -2.579845 | -2.657044 |
| H  | 0.333553  | 1.024402  | -1.743773 |
| C  | 0.918951  | 0.113434  | -1.550175 |
| H  | 0.559821  | -0.710835 | -2.187653 |
| C  | -3.619641 | -1.358941 | -1.719565 |
| H  | -4.580923 | -1.512560 | -1.209166 |
| C  | -3.434890 | 0.097942  | -2.142167 |
| H  | -3.090229 | 0.180275  | -3.184236 |
| C  | -1.826193 | -0.448518 | -0.525685 |
| C  | -2.011962 | 1.910899  | -1.135359 |
| C  | -2.060546 | 2.721266  | -2.271180 |
| C  | -1.614033 | 2.449296  | 0.090116  |
| C  | -1.689639 | 4.066900  | -2.199313 |
| C  | -1.240984 | 3.790655  | 0.181398  |
| C  | -1.279374 | 4.585463  | -0.968336 |
| H  | -0.994597 | 5.639036  | -0.898707 |
| Cu | 0.037502  | -0.323007 | 0.223108  |
| N  | -2.505281 | -1.562128 | -0.792556 |
| N  | -2.388269 | 0.555905  | -1.222277 |
| C  | 1.584366  | -0.384810 | 1.521539  |
| C  | 0.363981  | -0.606761 | 2.259730  |
| H  | -4.295339 | -1.814575 | 1.249402  |
| H  | -4.347550 | 0.697121  | -2.016499 |
| H  | -3.550734 | -2.060461 | -2.563280 |
| H  | 1.925599  | 0.654610  | 1.550371  |
| C  | -0.190925 | 0.514120  | 3.058383  |
| C  | -0.183271 | -1.930161 | 2.599754  |
| O  | 0.716482  | 1.447226  | 3.350257  |
| O  | -1.337578 | 0.605545  | 3.457677  |
| O  | -1.104917 | -2.147381 | 3.366771  |
| O  | 0.423524  | -2.940064 | 1.960980  |
| C  | -0.000478 | -4.260677 | 2.273094  |
| H  | 0.190270  | -4.487246 | 3.330800  |
| H  | 0.587126  | -4.923356 | 1.629064  |
| H  | -1.072382 | -4.389469 | 2.070419  |
| C  | 0.326659  | 2.466755  | 4.262176  |
| H  | -0.631628 | 2.914557  | 3.974928  |
| H  | 1.122995  | 3.218298  | 4.239899  |

|    |           |           |           |
|----|-----------|-----------|-----------|
| H  | 0.235774  | 2.047078  | 5.274157  |
| C  | -2.218721 | -2.869426 | -0.223132 |
| H  | -1.481174 | -2.677081 | 0.563404  |
| C  | -1.576432 | -3.793960 | -1.242911 |
| C  | -2.325418 | -4.628072 | -2.080669 |
| C  | -0.181905 | -3.790273 | -1.369544 |
| C  | -1.693068 | -5.439532 | -3.023688 |
| H  | -3.414450 | -4.655549 | -2.004578 |
| C  | 0.451700  | -4.601852 | -2.307644 |
| H  | 0.411463  | -3.138963 | -0.721171 |
| C  | -0.304131 | -5.429647 | -3.138707 |
| H  | -2.292476 | -6.084233 | -3.670108 |
| H  | 1.540515  | -4.589178 | -2.390195 |
| H  | 0.190546  | -6.067447 | -3.874363 |
| C  | -3.456652 | -3.461417 | 0.464485  |
| H  | -3.177763 | -4.459072 | 0.840598  |
| H  | -4.262621 | -3.626833 | -0.275580 |
| O  | -3.901760 | -2.693965 | 1.533284  |
| C  | 2.628860  | -1.334102 | 1.201119  |
| H  | 2.394601  | -2.394635 | 1.267923  |
| C  | 3.857834  | -0.931273 | 0.805384  |
| H  | 4.076963  | 0.139354  | 0.770859  |
| C  | 4.987026  | -1.801346 | 0.452018  |
| C  | 6.220813  | -1.211453 | 0.130447  |
| C  | 4.889700  | -3.202253 | 0.400912  |
| C  | 7.319277  | -1.989250 | -0.227030 |
| H  | 6.306986  | -0.121602 | 0.148343  |
| C  | 5.986903  | -3.980423 | 0.042757  |
| H  | 3.943471  | -3.694176 | 0.635243  |
| C  | 7.207185  | -3.379333 | -0.272416 |
| H  | 8.267694  | -1.507189 | -0.474490 |
| H  | 5.887885  | -5.067762 | 0.005992  |
| H  | 8.065753  | -3.992615 | -0.554797 |
| C  | -0.828188 | 4.365102  | 1.507917  |
| H  | 0.099157  | 3.888802  | 1.858109  |
| H  | -0.653896 | 5.447945  | 1.445636  |
| H  | -1.600568 | 4.188221  | 2.271730  |
| C  | -1.716935 | 4.923095  | -3.438537 |
| H  | -1.538062 | 5.980993  | -3.202702 |
| H  | -0.942639 | 4.601107  | -4.152429 |
| H  | -2.686333 | 4.844398  | -3.953013 |
| H  | -2.376463 | 2.304833  | -3.229249 |
| H  | -1.643679 | 1.823008  | 0.985120  |
| O  | -4.541189 | -0.247302 | 1.415231  |
| Na | -3.045272 | -0.861869 | 2.950214  |
| C  | -5.299307 | 0.483158  | 0.656570  |
| C  | -5.064087 | 1.872739  | 0.472850  |
| C  | -6.398766 | -0.067809 | -0.058533 |
| C  | -5.834618 | 2.633044  | -0.400374 |
| H  | -4.230754 | 2.329435  | 1.012041  |
| C  | -7.163599 | 0.703267  | -0.929584 |
| H  | -6.625078 | -1.128940 | 0.086531  |
| C  | -6.888648 | 2.060610  | -1.120853 |
| H  | -5.602950 | 3.694734  | -0.528399 |
| H  | -7.993131 | 0.235506  | -1.468699 |
| H  | -7.489087 | 2.661880  | -1.806855 |

89

Figure\_S3-1\_9d(NaOPh)-Cu-allyl / electronic energy: -3597.06845638 a.u. / lowest freq: 14.75 cm<sup>-1</sup>

|    |           |           |           |
|----|-----------|-----------|-----------|
| Na | 1.466278  | -1.713895 | 0.568774  |
| H  | 4.895602  | -3.588713 | 0.817161  |
| H  | 4.692117  | -0.895972 | -2.541156 |
| O  | 3.335573  | -2.007938 | -0.584046 |
| C  | 5.271052  | -1.564621 | -1.896670 |
| C  | 4.600612  | -2.207337 | -0.820863 |
| H  | 7.102470  | -1.262094 | -2.980981 |
| C  | 6.625148  | -1.776136 | -2.141098 |
| C  | 5.384324  | -3.077572 | -0.017672 |
| C  | 7.377630  | -2.634567 | -1.334758 |
| C  | 6.737508  | -3.280572 | -0.272517 |
| H  | 8.439672  | -2.798024 | -1.529682 |
| H  | 7.306712  | -3.957090 | 0.372185  |
| H  | 1.822369  | -0.807067 | 3.943134  |
| H  | -2.251641 | -0.329887 | 3.139589  |
| C  | 0.449649  | -2.296353 | 3.162582  |
| C  | -1.148749 | -0.342683 | 3.068826  |
| H  | 0.743177  | -3.269591 | 2.747587  |
| C  | -0.656265 | -1.681110 | 2.668089  |
| H  | -0.722254 | 0.025625  | 4.016197  |
| B  | -1.373536 | -2.298457 | 1.423828  |
| O  | -2.713492 | -2.319048 | 1.179742  |
| H  | -1.727987 | -0.728011 | -0.976153 |
| O  | -0.646091 | -2.774963 | 0.347830  |
| H  | -0.369549 | -1.436810 | -1.877879 |
| C  | -1.416767 | -1.592283 | -1.578998 |
| H  | -3.924597 | -1.288533 | -0.925882 |
| C  | -1.545189 | -2.887384 | -0.779148 |
| C  | -2.937112 | -3.023746 | -0.060716 |
| C  | -4.089317 | -2.364956 | -0.799421 |
| H  | -2.035120 | -1.618693 | -2.487150 |

|    |           |           |           |
|----|-----------|-----------|-----------|
| H  | -5.022038 | -2.500680 | -0.233511 |
| H  | -2.452907 | -4.961768 | 0.822840  |
| H  | -4.156010 | -4.465844 | 0.969667  |
| C  | -3.284310 | -4.466581 | 0.300122  |
| H  | -0.161528 | -3.891634 | -2.091822 |
| C  | -1.138452 | -4.082032 | -1.624394 |
| H  | -1.058778 | -4.996627 | -1.023531 |
| H  | -4.221693 | -2.822726 | -1.791255 |
| H  | -3.534901 | -5.053460 | -0.594647 |
| H  | -1.873021 | -4.249881 | -2.425820 |
| H  | 2.084171  | -2.447422 | 4.577693  |
| C  | 1.310104  | -1.734587 | 4.260318  |
| H  | 0.715848  | -1.463962 | 5.150374  |
| C  | 0.319514  | 2.875268  | -1.993392 |
| H  | 1.033917  | 2.506723  | -2.740473 |
| C  | -1.127654 | 2.540540  | -2.354801 |
| H  | -1.705390 | 3.414017  | -2.684987 |
| C  | -0.661312 | 1.729692  | -0.210974 |
| C  | -3.004911 | 1.645974  | -0.933491 |
| C  | -3.559642 | 1.488554  | 0.340873  |
| C  | -3.804764 | 1.434619  | -2.061581 |
| C  | -4.882144 | 1.072030  | 0.498446  |
| C  | -5.140732 | 1.044490  | -1.923628 |
| C  | -5.665477 | 0.864801  | -0.641218 |
| H  | -6.706703 | 0.550845  | -0.526471 |
| Cu | -0.836713 | 0.775737  | 1.479326  |
| N  | 0.481016  | 2.176611  | -0.718861 |
| N  | -1.650734 | 2.012129  | -1.089715 |
| H  | 2.605203  | -0.823585 | -1.253202 |
| H  | -1.180566 | 1.768453  | -3.138589 |
| H  | 0.488311  | 3.954711  | -1.852253 |
| C  | 1.783728  | 1.989569  | -0.103034 |
| H  | 1.577644  | 1.419376  | 0.818373  |
| C  | 2.387717  | 3.326050  | 0.305028  |
| C  | 3.684660  | 3.715190  | -0.041325 |
| C  | 1.611056  | 4.193427  | 1.085504  |
| C  | 4.194290  | 4.943729  | 0.386120  |
| H  | 4.319736  | 3.066305  | -0.646305 |
| C  | 2.116435  | 5.418098  | 1.511249  |
| H  | 0.594881  | 3.899472  | 1.363203  |
| C  | 3.414073  | 5.797630  | 1.161301  |
| H  | 5.210992  | 5.230395  | 0.108577  |
| H  | 1.496950  | 6.078282  | 2.122170  |
| H  | 3.815380  | 6.756940  | 1.495184  |
| C  | 2.667582  | 1.110708  | -0.990647 |
| H  | 3.584280  | 0.863576  | -0.424765 |
| H  | 2.991597  | 1.684656  | -1.881421 |
| O  | 1.975771  | -0.040827 | -1.362266 |
| C  | -5.977773 | 0.764471  | -3.144325 |
| H  | -5.678591 | 1.395447  | -3.993282 |
| H  | -5.860945 | -0.286000 | -3.456591 |
| H  | -7.045661 | 0.932149  | -2.946707 |
| C  | -5.429241 | 0.820029  | 1.877761  |
| H  | -6.526964 | 0.864113  | 1.893808  |
| H  | -5.127045 | -0.182053 | 2.222954  |
| H  | -5.039940 | 1.546746  | 2.605212  |
| H  | -2.959357 | 1.704718  | 1.226933  |
| H  | -3.392248 | 1.559302  | -3.063750 |

89

Figure\_S3-1\_9b(Na0Ph)-Cu-allyl / electronic energy: -3597.06856996 a.u. / lowest freq: 15.34 cm<sup>-1</sup>

|    |           |           |           |
|----|-----------|-----------|-----------|
| Na | 0.148120  | -2.350929 | -0.661887 |
| H  | 2.438637  | -3.886514 | 0.418400  |
| H  | 4.437536  | -1.625816 | -2.657585 |
| O  | 2.188175  | -1.934213 | -1.331976 |
| C  | 4.457113  | -2.409826 | -1.896029 |
| C  | 3.271723  | -2.638718 | -1.144621 |
| H  | 6.503884  | -2.941304 | -2.274753 |
| C  | 5.611926  | -3.155530 | -1.678013 |
| C  | 3.330703  | -3.680261 | -0.180384 |
| C  | 5.648755  | -4.168717 | -0.715703 |
| C  | 4.491286  | -4.420599 | 0.026190  |
| H  | 6.559206  | -4.747918 | -0.547636 |
| H  | 4.492260  | -5.208637 | 0.785191  |
| H  | 2.110038  | -1.789209 | 2.251941  |
| H  | -1.683682 | -0.084569 | 3.012140  |
| C  | 0.177417  | -2.763996 | 2.184032  |
| C  | -0.716422 | -0.448477 | 2.624984  |
| H  | 0.009685  | -3.753268 | 1.738460  |
| C  | -0.814296 | -1.836152 | 2.123482  |
| H  | 0.060429  | -0.307140 | 3.395789  |
| B  | -2.112989 | -2.153360 | 1.318568  |
| O  | -3.369101 | -1.737541 | 1.633548  |
| H  | -2.845676 | -0.482203 | -0.927861 |
| O  | -2.073350 | -2.793843 | 0.089938  |
| H  | -2.386052 | -1.604043 | -2.238318 |
| C  | -3.158779 | -1.375665 | -1.489089 |
| H  | -4.906254 | -0.251131 | 0.103283  |
| C  | -3.345234 | -2.575300 | -0.562814 |
| C  | -4.288875 | -2.263960 | 0.657935  |

|    |           |           |           |
|----|-----------|-----------|-----------|
| C  | -5.353692 | -1.214414 | 0.379956  |
| H  | -4.085231 | -1.134855 | -2.028538 |
| H  | -5.962317 | -1.060989 | 1.282259  |
| H  | -4.158934 | -4.286914 | 1.470992  |
| H  | -5.400718 | -3.251670 | 2.212692  |
| C  | -4.917121 | -3.518031 | 1.262489  |
| H  | -3.003759 | -3.952870 | -2.186413 |
| C  | -3.717784 | -3.812772 | -1.361912 |
| H  | -3.704627 | -4.717295 | -0.741233 |
| H  | -6.020495 | -1.543104 | -0.431111 |
| H  | -5.677701 | -3.946520 | 0.595013  |
| H  | -4.721339 | -3.698819 | -1.797645 |
| H  | 2.106807  | -3.437236 | 2.912827  |
| C  | 1.510733  | -2.517409 | 2.830805  |
| H  | 1.401035  | -2.091228 | 3.843076  |
| C  | 1.280515  | 3.069545  | -2.003442 |
| H  | 1.565108  | 2.605156  | -2.959047 |
| C  | -0.172818 | 3.561404  | -1.995315 |
| H  | -0.276419 | 4.578520  | -1.584882 |
| C  | 0.060095  | 1.792810  | -0.476656 |
| C  | -2.217588 | 2.610963  | -0.829080 |
| C  | -2.678385 | 3.129778  | 0.395038  |
| C  | -3.100884 | 2.109301  | -1.801083 |
| C  | -4.054535 | 3.111730  | 0.641038  |
| C  | -4.470186 | 2.122037  | -1.519756 |
| C  | -4.944329 | 2.613849  | -0.307033 |
| H  | -6.016384 | 2.608530  | -0.098720 |
| Cu | -0.341132 | 0.639697  | 1.032050  |
| N  | 1.273784  | 2.050851  | -0.951347 |
| N  | -0.819266 | 2.595349  | -1.099937 |
| H  | 2.443780  | -0.610758 | -2.213460 |
| H  | -0.629024 | 3.549352  | -2.994037 |
| H  | 1.996706  | 3.870578  | -1.771134 |
| C  | 2.484707  | 1.372525  | -0.497575 |
| H  | 2.139125  | 0.425669  | -0.056505 |
| C  | 3.187276  | 2.170139  | 0.586692  |
| C  | 4.053990  | 3.229208  | 0.291404  |
| C  | 2.928357  | 1.870261  | 1.929919  |
| C  | 4.643739  | 3.972204  | 1.314760  |
| H  | 4.282158  | 3.482129  | -0.746497 |
| C  | 3.515716  | 2.610503  | 2.954124  |
| H  | 2.250016  | 1.047192  | 2.174293  |
| C  | 4.375475  | 3.666125  | 2.648300  |
| H  | 5.320155  | 4.793092  | 1.066340  |
| H  | 3.303057  | 2.360630  | 3.995928  |
| H  | 4.838980  | 4.246461  | 3.449152  |
| C  | 3.374358  | 0.994741  | -1.687423 |
| H  | 4.246875  | 0.448944  | -1.277619 |
| H  | 3.774104  | 1.901226  | -2.172724 |
| O  | 2.681605  | 0.261974  | -2.643836 |
| H  | -4.432045 | 3.504641  | 1.588162  |
| H  | -5.170862 | 1.726395  | -2.259259 |
| C  | -2.592705 | 1.563034  | -3.108381 |
| H  | -2.423060 | 2.369586  | -3.840006 |
| H  | -1.639450 | 1.031325  | -2.978681 |
| H  | -3.320420 | 0.870396  | -3.551477 |
| C  | -1.723572 | 3.682246  | 1.419703  |
| H  | -1.210134 | 2.868739  | 1.959856  |
| H  | -0.940363 | 4.298843  | 0.955650  |
| H  | -2.256508 | 4.292551  | 2.160509  |

121

Figure\_S3-1\_AA-9b(NaO<sub>Ph</sub>)-pc(1,6minor) / electronic energy: -4439.04836588 a.u. / lowest freq: 17.74 cm<sup>-1</sup>

|   |          |           |           |
|---|----------|-----------|-----------|
| H | 5.006221 | -3.838273 | 2.000642  |
| H | 6.968080 | -3.117877 | 1.002714  |
| C | 4.701490 | -4.467820 | 1.151939  |
| H | 3.820060 | -5.049255 | 1.458295  |
| B | 3.676188 | -1.588518 | 0.714762  |
| O | 5.014836 | -1.439220 | 0.432725  |
| H | 5.517082 | -5.168421 | 0.923706  |
| C | 6.844125 | -2.928421 | -0.070954 |
| O | 3.202868 | -2.811196 | 0.308844  |
| C | 4.333102 | -3.620057 | -0.065458 |
| C | 5.414911 | -2.532865 | -0.407154 |
| H | 7.135384 | -3.833500 | -0.624648 |
| C | 3.956037 | -4.517430 | -1.233190 |
| H | 5.955000 | -1.147801 | -1.966205 |
| C | 5.328834 | -2.044576 | -1.854079 |
| H | 4.840903 | -5.054843 | -1.605284 |
| H | 4.296885 | -1.775206 | -2.124597 |
| H | 3.523322 | -3.942074 | -2.061247 |
| H | 5.685629 | -2.805294 | -2.562558 |
| H | 3.219080 | -5.265699 | -0.906883 |
| H | 7.530982 | -2.118548 | -0.355846 |
| C | 2.814277 | -0.468212 | 1.365602  |
| C | 1.375729 | -0.625444 | 1.507095  |
| H | 0.930908 | -0.015461 | 2.305213  |
| H | 1.046796 | -1.673625 | 1.586337  |
| C | 3.452356 | 0.695262  | 1.675816  |
| H | 4.536244 | 0.746507  | 1.538561  |

|    |           |           |           |
|----|-----------|-----------|-----------|
| H  | 2.316915  | 1.714736  | 3.211653  |
| H  | 1.924964  | 2.204122  | 1.564217  |
| C  | 2.763164  | 1.904801  | 2.219763  |
| H  | 3.443618  | 2.762303  | 2.311548  |
| C  | -3.562824 | 1.000128  | 1.681941  |
| H  | -4.436180 | 1.308947  | 1.094710  |
| C  | -3.622094 | -0.491062 | 2.030093  |
| H  | -3.657282 | -0.679790 | 3.113049  |
| C  | -1.676524 | -0.069231 | 0.796944  |
| C  | -1.941852 | -2.343136 | 1.669104  |
| C  | -2.310087 | -3.335200 | 0.746894  |
| C  | -1.188784 | -2.642071 | 2.820002  |
| C  | -1.848797 | -4.639386 | 0.962924  |
| C  | -0.739873 | -3.953638 | 2.992052  |
| C  | -1.057934 | -4.944017 | 2.065679  |
| H  | -0.696824 | -5.964156 | 2.213749  |
| Cu | 0.133698  | -0.180063 | -0.029561 |
| N  | -2.332961 | 1.088858  | 0.887173  |
| N  | -2.368977 | -0.999307 | 1.461482  |
| C  | 1.458571  | 0.104685  | -1.523984 |
| C  | 0.169066  | -0.106014 | -2.149090 |
| H  | -3.925911 | 1.630106  | -1.207787 |
| H  | -4.484316 | -0.990377 | 1.560405  |
| H  | -3.500858 | 1.645563  | 2.571614  |
| H  | 2.111225  | -0.771618 | -1.514158 |
| C  | -0.247589 | -1.502297 | -2.398207 |
| C  | -0.616331 | 0.937371  | -2.834808 |
| O  | 0.656603  | -2.387036 | -1.969685 |
| O  | -1.299890 | -1.875090 | -2.894208 |
| O  | -1.599862 | 0.744144  | -3.528825 |
| O  | -0.155230 | 2.176520  | -2.652861 |
| C  | -0.884990 | 3.229818  | -3.276633 |
| H  | -0.847835 | 3.128571  | -4.369961 |
| H  | -0.386675 | 4.157023  | -2.972052 |
| H  | -1.930423 | 3.211408  | -2.938499 |
| C  | 0.326309  | -3.764029 | -2.049311 |
| H  | -0.539614 | -3.992502 | -1.414081 |
| H  | 1.202511  | -4.299759 | -1.674559 |
| H  | 0.109510  | -4.056769 | -3.085686 |
| C  | -1.834500 | 2.325221  | 0.314218  |
| H  | -1.194357 | 2.031873  | -0.529580 |
| C  | -0.965324 | 3.136984  | 1.262517  |
| C  | -0.222412 | 4.203439  | 0.738057  |
| C  | -0.846199 | 2.849752  | 2.624124  |
| C  | 0.598259  | 4.975983  | 1.554904  |
| H  | -0.278862 | 4.424685  | -0.331451 |
| C  | -0.028628 | 3.626087  | 3.447042  |
| H  | -1.379461 | 2.000518  | 3.054376  |
| C  | 0.692510  | 4.693439  | 2.918089  |
| H  | 1.173015  | 5.798520  | 1.123775  |
| H  | 0.052378  | 3.384532  | 4.509035  |
| H  | 1.337326  | 5.295824  | 3.561138  |
| C  | -2.981127 | 3.145192  | -0.296986 |
| H  | -2.565852 | 4.112330  | -0.619382 |
| H  | -3.722707 | 3.380390  | 0.493425  |
| O  | -3.554682 | 2.538426  | -1.406280 |
| C  | 2.121958  | 1.363526  | -1.284667 |
| H  | 1.517807  | 2.268652  | -1.268275 |
| C  | 3.450927  | 1.435539  | -1.024366 |
| H  | 4.054621  | 0.528412  | -1.100176 |
| C  | 4.199418  | 2.660112  | -0.713614 |
| C  | 5.594629  | 2.585333  | -0.567903 |
| C  | 3.581051  | 3.907452  | -0.523348 |
| C  | 6.346863  | 3.712176  | -0.245786 |
| H  | 6.088947  | 1.618614  | -0.696528 |
| C  | 4.332054  | 5.034810  | -0.203658 |
| H  | 2.496573  | 3.998424  | -0.606827 |
| C  | 5.718424  | 4.944389  | -0.062504 |
| H  | 7.429905  | 3.626512  | -0.132208 |
| H  | 3.830162  | 5.994069  | -0.056516 |
| H  | 6.304384  | 5.830080  | 0.192881  |
| Na | -3.276992 | -0.605920 | -2.784464 |
| O  | -4.574046 | 0.129637  | -1.167031 |
| C  | -5.798743 | 0.076411  | -0.726141 |
| C  | -6.536218 | 1.255061  | -0.422413 |
| C  | -6.464595 | -1.158489 | -0.497386 |
| C  | -7.830997 | 1.194034  | 0.085039  |
| H  | -6.058118 | 2.220397  | -0.611553 |
| C  | -7.760606 | -1.204374 | 0.009512  |
| H  | -5.933405 | -2.085157 | -0.728413 |
| C  | -8.460676 | -0.032899 | 0.311747  |
| H  | -8.360460 | 2.126022  | 0.304934  |
| H  | -8.234718 | -2.177026 | 0.172184  |
| H  | -9.475820 | -0.075864 | 0.712096  |
| H  | -0.135263 | -4.199936 | 3.868382  |
| H  | -2.121876 | -5.423731 | 0.252125  |
| C  | -3.181397 | -3.031692 | -0.441291 |
| H  | -3.619383 | -2.025434 | -0.394692 |
| H  | -2.601817 | -3.096453 | -1.374525 |

|   |           |           |           |
|---|-----------|-----------|-----------|
| H | -3.998205 | -3.765365 | -0.510444 |
| C | -0.904705 | -1.599752 | 3.868615  |
| H | 0.061951  | -1.785841 | 4.355593  |
| H | -0.884611 | -0.587029 | 3.448063  |
| H | -1.681598 | -1.622630 | 4.650065  |

121

Figure\_S3-1\_AA-9b(NaO<sub>Ph</sub>)-ts(1,6minor) / electronic energy: -4439.04644858 a.u. / lowest freq: -305.39 cm<sup>-1</sup>

|    |           |           |           |
|----|-----------|-----------|-----------|
| C  | -0.816448 | -1.703765 | 3.816329  |
| H  | -0.728413 | -0.673569 | 3.448528  |
| H  | -1.666631 | -1.735577 | 4.517117  |
| H  | 0.091652  | -1.941629 | 4.386280  |
| H  | 2.074218  | 2.369535  | 1.540851  |
| H  | 0.950529  | -1.411559 | 1.694922  |
| C  | 3.524345  | 0.779378  | 1.365728  |
| C  | 1.381267  | -0.413942 | 1.547875  |
| H  | 4.608238  | 0.688334  | 1.255940  |
| C  | 2.769530  | -0.379659 | 1.265206  |
| H  | 0.968521  | 0.353206  | 2.214848  |
| B  | 3.424432  | -1.675624 | 0.704774  |
| O  | 2.857177  | -2.918157 | 0.817555  |
| H  | 3.200795  | -2.699393 | -1.995908 |
| O  | 4.622117  | -1.708923 | 0.036700  |
| H  | 4.830442  | -2.198008 | -2.504259 |
| C  | 4.266496  | -2.968298 | -1.958796 |
| H  | 2.506423  | -4.721656 | -1.074730 |
| C  | 4.773777  | -3.029879 | -0.518678 |
| C  | 3.845678  | -3.884588 | 0.418373  |
| C  | 3.155100  | -5.056594 | -0.258178 |
| H  | 4.405402  | -3.928372 | -2.476126 |
| H  | 2.529591  | -5.589692 | 0.471891  |
| H  | 5.076151  | -3.522360 | 2.185854  |
| H  | 3.805632  | -4.752332 | 2.387812  |
| C  | 4.554868  | -4.353765 | 1.688973  |
| H  | 6.811134  | -2.780521 | -1.180317 |
| C  | 6.242541  | -3.420207 | -0.490186 |
| H  | 6.673107  | -3.304490 | 0.512493  |
| H  | 3.895432  | -5.764387 | -0.659584 |
| H  | 5.285605  | -5.145917 | 1.473306  |
| H  | 6.369746  | -4.465260 | -0.809826 |
| H  | 3.724035  | 2.832893  | 2.022770  |
| C  | 2.995015  | 2.012256  | 2.032719  |
| H  | 2.726907  | 1.811601  | 3.084803  |
| C  | -3.479536 | 0.945164  | 1.791081  |
| H  | -4.379440 | 1.279805  | 1.260737  |
| C  | -3.505537 | -0.567237 | 2.040728  |
| H  | -3.527530 | -0.825400 | 3.109342  |
| C  | -1.603055 | -0.027984 | 0.788840  |
| C  | -1.765246 | -2.345269 | 1.548648  |
| C  | -1.018260 | -2.686169 | 2.693241  |
| C  | -2.045253 | -3.281805 | 0.542198  |
| C  | -0.481337 | -3.972446 | 2.772567  |
| C  | -1.493040 | -4.563534 | 0.664399  |
| C  | -0.705282 | -4.901618 | 1.758944  |
| H  | -0.271876 | -5.901512 | 1.832403  |
| Cu | 0.173531  | -0.071472 | -0.102109 |
| N  | -2.281709 | 1.106271  | 0.959659  |
| N  | -2.249146 | -1.009691 | 1.426484  |
| C  | 1.510555  | 0.262642  | -1.637265 |
| C  | 0.199135  | 0.078909  | -2.238643 |
| H  | -3.918781 | 1.755908  | -1.047723 |
| H  | -4.361291 | -1.052381 | 1.545017  |
| H  | -3.390830 | 1.529430  | 2.720223  |
| H  | 2.148130  | -0.624004 | -1.674116 |
| C  | -0.200935 | -1.282629 | -2.620828 |
| C  | -0.622124 | 1.165440  | -2.791431 |
| O  | 0.750782  | -2.201225 | -2.393177 |
| O  | -1.281106 | -1.617871 | -3.084909 |
| O  | -1.647963 | 1.034203  | -3.440127 |
| O  | -0.147827 | 2.390296  | -2.535136 |
| C  | -0.911502 | 3.485330  | -3.031403 |
| H  | -0.918545 | 3.485577  | -4.130249 |
| H  | -0.410460 | 4.388504  | -2.664936 |
| H  | -1.943447 | 3.424536  | -2.657846 |
| C  | 0.431483  | -3.558414 | -2.655994 |
| H  | -0.114583 | -3.990292 | -1.804582 |
| H  | 1.387029  | -4.078921 | -2.782999 |
| H  | -0.170023 | -3.653369 | -3.568132 |
| C  | -1.817523 | 2.381965  | 0.445817  |
| H  | -1.216891 | 2.149096  | -0.444559 |
| C  | -0.904519 | 3.135009  | 1.402194  |
| C  | -0.179411 | 4.228848  | 0.909791  |
| C  | -0.730005 | 2.770350  | 2.739244  |
| C  | 0.673847  | 4.955221  | 1.735747  |
| H  | -0.276523 | 4.509527  | -0.142393 |
| C  | 0.122470  | 3.498324  | 3.571276  |
| H  | -1.249582 | 1.899692  | 3.142546  |
| C  | 0.821624  | 4.596156  | 3.076014  |
| H  | 1.233051  | 5.800485  | 1.328765  |
| H  | 0.245424  | 3.196231  | 4.613569  |

|    |           |           |           |
|----|-----------|-----------|-----------|
| H  | 1.491845  | 5.162006  | 3.726171  |
| C  | -2.996249 | 3.230709  | -0.053494 |
| H  | -2.604122 | 4.224328  | -0.319732 |
| H  | -3.705897 | 3.397413  | 0.782453  |
| O  | -3.610683 | 2.699079  | -1.179774 |
| C  | 2.177976  | 1.457440  | -1.284976 |
| H  | 1.617997  | 2.389837  | -1.275160 |
| C  | 3.509629  | 1.450840  | -0.906315 |
| H  | 4.092111  | 0.547897  | -1.101925 |
| C  | 4.301308  | 2.677439  | -0.707037 |
| C  | 5.702030  | 2.588135  | -0.650833 |
| C  | 3.715013  | 3.943891  | -0.543025 |
| C  | 6.488907  | 3.717610  | -0.438540 |
| H  | 6.176128  | 1.609801  | -0.769603 |
| C  | 4.500363  | 5.073709  | -0.330733 |
| H  | 2.628625  | 4.049561  | -0.558719 |
| C  | 5.891366  | 4.968166  | -0.276233 |
| H  | 7.576247  | 3.619935  | -0.396899 |
| H  | 4.020547  | 6.046625  | -0.200064 |
| H  | 6.504986  | 5.855581  | -0.106527 |
| H  | -1.696383 | -5.305960 | -0.112022 |
| H  | 0.123932  | -4.246189 | 3.640069  |
| C  | -2.927916 | -2.949561 | -0.629403 |
| O  | -4.497508 | 0.218862  | -1.094721 |
| Na | -3.261915 | -0.435559 | -2.798175 |
| C  | -5.707532 | 0.088882  | -0.631162 |
| C  | -6.312957 | -1.184783 | -0.449796 |
| C  | -6.489739 | 1.216901  | -0.253941 |
| C  | -7.594528 | -1.314066 | 0.079291  |
| H  | -5.744827 | -2.073802 | -0.735687 |
| C  | -7.768831 | 1.072374  | 0.275279  |
| H  | -6.057364 | 2.210276  | -0.403628 |
| C  | -8.338969 | -0.191462 | 0.452734  |
| H  | -8.021847 | -2.313708 | 0.203976  |
| H  | -8.334125 | 1.967478  | 0.552392  |
| H  | -9.342193 | -0.299671 | 0.870459  |
| H  | -3.729193 | -3.698486 | -0.721093 |
| H  | -2.356256 | -2.963210 | -1.568712 |
| H  | -3.391512 | -1.958153 | -0.532641 |

108

Figure\_S3-1\_AA-9b(Na0Ph)-prod(1,6minor) / electronic energy: -4131.89527188 a.u. / lowest freq: 22.82 cm-1

|    |           |           |           |
|----|-----------|-----------|-----------|
| C  | 1.394849  | 1.937125  | -2.756669 |
| H  | 0.098919  | 3.479501  | -2.023850 |
| C  | 0.403146  | 2.460198  | -1.725160 |
| H  | 2.276582  | 2.590122  | -2.814258 |
| H  | 2.835519  | 6.862365  | 0.027038  |
| H  | 0.949715  | 5.251263  | 0.002083  |
| C  | 3.035070  | 5.794957  | -0.093054 |
| C  | 1.976159  | 4.888315  | -0.106089 |
| H  | 5.179490  | 6.045863  | -0.211312 |
| C  | 4.347049  | 5.338780  | -0.224387 |
| C  | 2.200852  | 3.513268  | -0.250438 |
| C  | 4.585361  | 3.972419  | -0.368789 |
| C  | 1.006247  | 2.574450  | -0.296031 |
| H  | 0.227332  | 3.037721  | 0.324728  |
| C  | 3.522571  | 3.069059  | -0.381051 |
| H  | 5.608416  | 3.602622  | -0.471805 |
| H  | 3.730423  | 2.003386  | -0.492244 |
| C  | 1.305535  | 1.214640  | 0.299028  |
| H  | 2.165386  | 0.678749  | -0.107748 |
| C  | -0.873629 | 1.635922  | -1.612724 |
| H  | -0.050099 | 1.384209  | 1.894011  |
| C  | 0.793943  | 0.801166  | 1.502190  |
| H  | -0.451378 | 0.152244  | -3.133567 |
| C  | -1.139181 | 0.524942  | -2.367790 |
| H  | -2.130485 | 0.064643  | -2.335220 |
| Cu | -0.265367 | -0.147889 | -0.490389 |
| C  | -0.373151 | -2.131976 | -0.576681 |
| N  | -1.454394 | -2.893173 | -0.824203 |
| H  | 2.052802  | -1.588560 | -5.026692 |
| N  | 0.691732  | -2.923423 | -0.543858 |
| C  | 2.672023  | -0.592548 | 2.503149  |
| O  | 3.490063  | 0.110819  | 1.684107  |
| C  | 1.275920  | -0.246977 | 2.385060  |
| O  | 0.539931  | -1.819604 | 4.042015  |
| C  | 0.356056  | -0.840918 | 3.321447  |
| C  | 2.053324  | -2.438263 | -0.388952 |
| C  | 0.385192  | -4.327213 | -0.841301 |
| H  | 0.830267  | -4.956333 | -0.060098 |
| C  | -1.144511 | -4.328313 | -0.854337 |
| H  | -1.569395 | -4.805029 | -1.748504 |
| C  | -2.790689 | -2.419570 | -0.939222 |
| C  | -3.521966 | -2.147158 | 0.226763  |
| C  | -3.351741 | -2.275131 | -2.219248 |
| C  | -4.846473 | -1.723381 | 0.091259  |
| C  | -4.674700 | -1.832057 | -2.313876 |
| C  | -5.418360 | -1.563830 | -1.167809 |
| H  | -6.452618 | -1.224310 | -1.257949 |
| Na | 2.065336  | -3.409897 | 3.298196  |



|   |           |           |           |
|---|-----------|-----------|-----------|
| H | -1.576343 | -4.823520 | 0.031012  |
| H | 0.812017  | -4.610335 | -1.817384 |
| O | -0.847687 | -0.209803 | 3.364734  |
| O | 3.171221  | -1.405471 | 3.278461  |
| C | 4.877000  | -0.118117 | 1.826358  |
| H | 5.220855  | 0.112632  | 2.845035  |
| H | 5.370391  | 0.550740  | 1.110404  |
| H | 5.133436  | -1.164435 | 1.600810  |
| C | -1.763565 | -0.658320 | 4.344082  |
| H | -1.943645 | -1.738807 | 4.260678  |
| H | -2.696323 | -0.110031 | 4.167227  |
| H | -1.392540 | -0.443283 | 5.357414  |
| H | 2.012972  | -1.659040 | 0.383381  |
| C | 2.596607  | -1.821979 | -1.661062 |
| C | 3.755741  | -1.035769 | -1.595913 |
| C | 1.996846  | -2.006054 | -2.912371 |
| C | 4.302820  | -0.460944 | -2.740789 |
| H | 4.224675  | -0.863034 | -0.626131 |
| C | 2.541588  | -1.432344 | -4.062178 |
| H | 1.081086  | -2.594902 | -2.994985 |
| C | 3.698377  | -0.659025 | -3.982906 |
| H | 5.202579  | 0.153597  | -2.660804 |
| H | 4.121879  | -0.204938 | -4.881213 |
| C | 2.957536  | -3.573742 | 0.194591  |
| H | 3.965003  | -3.087322 | 0.303566  |
| H | 3.108389  | -4.300012 | -0.656149 |
| O | 2.463421  | -4.118494 | 1.312350  |
| H | 1.747427  | 0.923332  | -2.510735 |
| H | 0.942578  | 1.898845  | -3.758543 |
| B | -2.036995 | 2.166233  | -0.699805 |
| O | -2.003634 | 3.364042  | -0.047238 |
| O | -3.189384 | 1.470049  | -0.479010 |
| C | -3.306537 | 3.590572  | 0.529271  |
| C | -3.900484 | 2.132857  | 0.587714  |
| C | -3.548929 | 1.392221  | 1.875231  |
| H | -2.467620 | 1.412049  | 2.076206  |
| H | -4.076960 | 1.814547  | 2.741522  |
| H | -3.846389 | 0.341439  | 1.764972  |
| C | -5.394244 | 2.048226  | 0.320405  |
| H | -5.951696 | 2.639600  | 1.061794  |
| H | -5.646693 | 2.412860  | -0.683047 |
| H | -5.722799 | 1.003006  | 0.395437  |
| C | -4.062145 | 4.510907  | -0.426956 |
| H | -3.485507 | 5.436621  | -0.563659 |
| H | -4.195537 | 4.042207  | -1.412820 |
| H | -5.051192 | 4.776083  | -0.028433 |
| C | -3.132247 | 4.259133  | 1.883322  |
| H | -4.104101 | 4.368767  | 2.386819  |
| H | -2.461278 | 3.683904  | 2.533577  |
| H | -2.701593 | 5.261608  | 1.748498  |
| C | -2.546941 | -2.586937 | -3.452679 |
| H | -1.520329 | -2.202737 | -3.367683 |
| H | -2.472417 | -3.674011 | -3.616177 |
| H | -3.010541 | -2.149095 | -4.346581 |
| C | -2.875707 | -2.284296 | 1.576075  |
| H | -2.377669 | -3.257826 | 1.696466  |
| H | -2.104026 | -1.511204 | 1.715661  |
| H | -3.616558 | -2.175461 | 2.379290  |
| H | -5.125896 | -1.700201 | -3.300329 |
| H | -5.435043 | -1.515514 | 0.988624  |

83

Figure\_S4-1\_PA-9d(Na)-prod(1,6major) / electronic energy: -3681.07040691 a.u. / lowest freq: 16.84 cm-1

|    |           |           |           |
|----|-----------|-----------|-----------|
| C  | 3.359716  | 2.192561  | 0.186378  |
| H  | 4.084937  | 2.045474  | -0.623987 |
| C  | 2.301682  | 3.253634  | -0.084287 |
| H  | 2.487627  | 4.197878  | 0.443917  |
| C  | 1.252797  | 1.255216  | 0.519749  |
| C  | -0.154011 | 3.268993  | 0.464251  |
| C  | -0.319177 | 4.494082  | -0.187628 |
| C  | -1.234976 | 2.721506  | 1.168563  |
| C  | -1.560009 | 5.142558  | -0.190544 |
| C  | -2.481791 | 3.342500  | 1.164703  |
| C  | -2.635440 | 4.552248  | 0.475124  |
| H  | -3.608401 | 5.051384  | 0.474548  |
| Cu | -0.121667 | -0.113799 | 0.916922  |
| N  | 2.533441  | 0.987727  | 0.317927  |
| N  | 1.081772  | 2.599858  | 0.407618  |
| C  | -0.564338 | -1.667253 | -0.868412 |
| C  | 0.339764  | -1.258115 | -1.914799 |
| Na | 3.394344  | -0.054629 | -3.260847 |
| H  | 2.204253  | 3.468661  | -1.162679 |
| H  | 3.895673  | 2.382327  | 1.131622  |
| H  | -0.320887 | -2.664768 | -0.488597 |
| C  | 0.330184  | 0.057031  | -2.510178 |
| C  | 1.379788  | -2.181028 | -2.311050 |
| O  | -0.739871 | 0.790831  | -2.142238 |
| O  | 1.175437  | 0.555265  | -3.250797 |
| O  | 2.232930  | -2.017594 | -3.178391 |
| O  | 1.379155  | -3.338978 | -1.604480 |

|   |           |           |           |
|---|-----------|-----------|-----------|
| C | 2.407538  | -4.265605 | -1.896842 |
| H | 2.351645  | -4.607837 | -2.940246 |
| H | 2.254729  | -5.113124 | -1.218654 |
| C | 3.399527  | -3.823111 | -1.723251 |
| C | -0.815652 | 2.115161  | -2.630712 |
| H | 0.107083  | 2.670519  | -2.414192 |
| H | -1.657088 | 2.587839  | -2.110041 |
| H | -0.986911 | 2.126332  | -3.717459 |
| C | 3.068782  | -0.375270 | 0.295079  |
| H | 2.466909  | -0.929703 | -0.436890 |
| C | 2.913517  | -1.055084 | 1.632471  |
| C | 3.331851  | -0.440029 | 2.819155  |
| C | 2.353206  | -2.335772 | 1.700930  |
| C | 3.189746  | -1.088835 | 4.045036  |
| H | 3.762730  | 0.563840  | 2.785479  |
| C | 2.209549  | -2.987696 | 2.926046  |
| H | 2.009673  | -2.814301 | 0.779042  |
| C | 2.626782  | -2.366278 | 4.102388  |
| H | 3.519665  | -0.595379 | 4.962203  |
| H | 1.758775  | -3.981983 | 2.962468  |
| H | 2.509601  | -2.871378 | 5.063609  |
| C | 4.523399  | -0.386753 | -0.259662 |
| H | 4.841665  | -1.457743 | -0.141037 |
| H | 5.143480  | 0.155563  | 0.512282  |
| O | 4.619823  | 0.106165  | -1.502499 |
| C | -1.673705 | -1.103385 | -0.279100 |
| H | -2.108769 | -0.183596 | -0.678769 |
| C | -2.533340 | -1.923593 | 0.669128  |
| H | -1.995303 | -2.860483 | 0.883000  |
| C | -3.870211 | -2.293151 | 0.052170  |
| C | -4.201326 | -3.633394 | -0.170953 |
| C | -4.792318 | -1.306787 | -0.322316 |
| C | -5.420834 | -3.983663 | -0.751757 |
| H | -3.491248 | -4.415155 | 0.111738  |
| C | -6.012090 | -1.651995 | -0.900811 |
| H | -4.555115 | -0.250350 | -0.169659 |
| C | -6.330977 | -2.993550 | -1.117888 |
| H | -5.658039 | -5.036680 | -0.919528 |
| H | -6.717437 | -0.868909 | -1.187771 |
| H | -7.285637 | -3.264252 | -1.574113 |
| C | -3.642936 | 2.709122  | 1.886248  |
| H | -3.302719 | 2.104875  | 2.739717  |
| H | -4.349242 | 3.464481  | 2.258237  |
| H | -4.204892 | 2.044533  | 1.209744  |
| C | -1.716402 | 6.449919  | -0.923143 |
| H | -2.717092 | 6.878335  | -0.776058 |
| H | -0.974363 | 7.186701  | -0.580138 |
| H | -1.561701 | 6.313378  | -2.004789 |
| H | 0.512466  | 4.951260  | -0.725950 |
| H | -1.094165 | 1.812936  | 1.754301  |
| C | -0.345908 | -0.525533 | 3.086856  |
| H | 0.549898  | -0.328070 | 3.656043  |
| C | -1.418580 | -0.828411 | 2.582812  |
| C | -2.721248 | -1.202714 | 2.022067  |
| H | -3.270254 | -1.835958 | 2.736222  |
| H | -3.314996 | -0.284862 | 1.882176  |

83

Figure\_S4-1\_PA-9d(Na)-ts(1,6major) / electronic energy: -3681.01674239 a.u. / lowest freq: -425.84 cm-1

|    |           |           |           |
|----|-----------|-----------|-----------|
| C  | 2.866803  | 2.675946  | 1.037241  |
| H  | 3.618483  | 3.073400  | 0.344267  |
| C  | 1.496643  | 3.345149  | 0.935558  |
| H  | 1.285729  | 4.038149  | 1.760640  |
| C  | 1.246966  | 1.039170  | 0.692392  |
| C  | -0.796962 | 2.290790  | 1.180897  |
| C  | -1.490484 | 3.438376  | 0.798338  |
| C  | -1.479557 | 1.247321  | 1.820637  |
| C  | -2.874586 | 3.531001  | 0.998245  |
| C  | -2.851518 | 1.327151  | 2.045160  |
| C  | -3.540848 | 2.470137  | 1.614215  |
| H  | -4.618525 | 2.543255  | 1.788127  |
| Cu | 0.443095  | -0.673683 | 0.087133  |
| N  | 2.545629  | 1.293601  | 0.660974  |
| N  | 0.593216  | 2.188102  | 0.972750  |
| C  | -0.520351 | -1.415746 | -1.646627 |
| C  | 0.525645  | -0.530428 | -2.098307 |
| Na | 3.541048  | 1.559954  | -2.683597 |
| H  | 1.377226  | 3.887276  | -0.017588 |
| H  | 3.266719  | 2.708454  | 2.064537  |
| H  | -0.293059 | -2.477742 | -1.765329 |
| C  | 0.359803  | 0.903986  | -2.362672 |
| C  | 1.798868  | -1.136899 | -2.511518 |
| O  | -0.906702 | 1.322018  | -2.270671 |
| O  | 1.249489  | 1.695745  | -2.636288 |
| O  | 2.729106  | -0.577606 | -3.070754 |
| O  | 1.883062  | -2.439152 | -2.201216 |
| C  | 3.067140  | -3.118499 | -2.585350 |
| H  | 3.157940  | -3.161586 | -3.680079 |
| H  | 2.981622  | -4.130150 | -2.174801 |
| H  | 3.957585  | -2.618517 | -2.178973 |

|   |           |           |           |
|---|-----------|-----------|-----------|
| C | -1.154302 | 2.696016  | -2.515703 |
| H | -0.506982 | 3.328730  | -1.895213 |
| H | -2.204989 | 2.866151  | -2.256610 |
| H | -0.981270 | 2.936927  | -3.574367 |
| C | 3.541140  | 0.255101  | 0.406446  |
| H | 3.238270  | -0.254293 | -0.521579 |
| C | 3.569791  | -0.776710 | 1.510104  |
| C | 3.338648  | -0.440898 | 2.848798  |
| C | 3.833792  | -2.114224 | 1.194831  |
| C | 3.358980  | -1.418274 | 3.843111  |
| H | 3.114557  | 0.593821  | 3.117691  |
| C | 3.857616  | -3.094769 | 2.184782  |
| H | 4.001163  | -2.392857 | 0.151635  |
| C | 3.616254  | -2.750116 | 3.514915  |
| H | 3.167032  | -1.139253 | 4.881685  |
| H | 4.052018  | -4.135263 | 1.915236  |
| H | 3.623372  | -3.516908 | 4.292376  |
| C | 4.920609  | 0.898773  | 0.075156  |
| H | 5.615125  | 0.019787  | -0.011122 |
| H | 5.252989  | 1.400160  | 1.029742  |
| O | 4.871332  | 1.700685  | -0.997615 |
| C | -1.825621 | -1.113976 | -1.224459 |
| H | -2.112915 | -0.072661 | -1.093273 |
| C | -2.736375 | -2.126181 | -0.917369 |
| H | -2.504266 | -3.121690 | -1.302082 |
| C | -4.180716 | -1.862138 | -0.728250 |
| C | -5.091188 | -2.927133 | -0.811338 |
| C | -4.686171 | -0.577836 | -0.471120 |
| C | -6.457825 | -2.720791 | -0.638977 |
| H | -4.716894 | -3.934837 | -1.011349 |
| C | -6.052175 | -0.370517 | -0.297835 |
| H | -4.007551 | 0.273745  | -0.389597 |
| C | -6.945620 | -1.439678 | -0.379347 |
| H | -7.147072 | -3.565407 | -0.707643 |
| H | -6.421400 | 0.637572  | -0.095148 |
| H | -8.016271 | -1.274778 | -0.241455 |
| C | -3.571403 | 0.223601  | 2.775210  |
| H | -2.873392 | -0.563606 | 3.091738  |
| H | -4.079472 | 0.612349  | 3.670806  |
| H | -4.340469 | -0.236372 | 2.136249  |
| C | -3.621699 | 4.751481  | 0.526618  |
| H | -4.614503 | 4.821204  | 0.991853  |
| H | -3.067914 | 5.673798  | 0.755415  |
| H | -3.766496 | 4.721037  | -0.565435 |
| H | -0.962707 | 4.269764  | 0.326130  |
| H | -0.924754 | 0.375016  | 2.167759  |
| C | 0.058354  | -2.071084 | 1.498789  |
| H | 0.887162  | -2.110107 | 2.209329  |
| C | -1.081011 | -2.617436 | 1.438593  |
| C | -2.349736 | -2.995465 | 1.131882  |
| H | -2.536143 | -4.018874 | 0.794614  |
| H | -3.176879 | -2.515024 | 1.662542  |

83

Figure\_S4-1\_PA-9d(Na)-pc(1,6major) / electronic energy: -3681.03006649 a.u. / lowest freq: 18.39 cm-1

|    |           |           |           |
|----|-----------|-----------|-----------|
| C  | -3.023393 | 1.926663  | -1.975684 |
| H  | -3.734352 | 2.631185  | -1.527316 |
| C  | -1.644732 | 2.532563  | -2.247739 |
| H  | -1.460479 | 2.735628  | -3.310896 |
| C  | -1.402412 | 0.617317  | -0.940675 |
| C  | 0.652603  | 1.501882  | -1.882637 |
| C  | 1.359014  | 2.709201  | -1.868560 |
| C  | 1.339277  | 0.294672  | -2.012511 |
| C  | 2.754866  | 2.706409  | -1.925556 |
| C  | 2.736594  | 0.269001  | -2.064975 |
| C  | 3.429058  | 1.480180  | -2.007548 |
| H  | 4.522556  | 1.472153  | -2.038805 |
| Cu | -0.443186 | -0.653845 | 0.252837  |
| N  | -2.699485 | 0.874906  | -1.002373 |
| N  | -0.752993 | 1.482267  | -1.747403 |
| C  | 0.760117  | -0.627317 | 1.919256  |
| C  | -0.135673 | 0.472048  | 1.979585  |
| Na | -2.935225 | 2.839754  | 1.562535  |
| H  | -1.490409 | 3.465715  | -1.680749 |
| H  | -3.469084 | 1.485925  | -2.882489 |
| H  | 0.498041  | -1.513492 | 2.501012  |
| C  | 0.207989  | 1.890904  | 1.671427  |
| C  | -1.433009 | 0.294213  | 2.680471  |
| O  | 1.493583  | 2.169302  | 1.832244  |
| O  | -0.595730 | 2.739101  | 1.334695  |
| O  | -2.173521 | 1.191039  | 3.035081  |
| O  | -1.735423 | -0.985506 | 2.885773  |
| C  | -2.968272 | -1.264192 | 3.539023  |
| H  | -2.954150 | -0.882689 | 4.569069  |
| H  | -3.070482 | -2.353768 | 3.537429  |
| H  | -3.805816 | -0.801485 | 2.998386  |
| C  | 1.914143  | 3.504478  | 1.577594  |
| H  | 1.653824  | 3.801238  | 0.554086  |
| H  | 3.001317  | 3.507010  | 1.706997  |
| H  | 1.445484  | 4.196091  | 2.290993  |

|   |           |           |           |
|---|-----------|-----------|-----------|
| C | -3.700064 | 0.104960  | -0.274107 |
| H | -3.278032 | -0.077292 | 0.727101  |
| C | -3.981229 | -1.240056 | -0.906391 |
| C | -3.683604 | -1.525988 | -2.242664 |
| C | -4.571875 | -2.243679 | -0.127525 |
| C | -3.970192 | -2.778103 | -2.787385 |
| H | -3.199125 | -0.773480 | -2.867716 |
| C | -4.859570 | -3.495455 | -0.667201 |
| H | -4.794098 | -2.045174 | 0.924454  |
| C | -4.560659 | -3.767787 | -2.002909 |
| H | -3.725232 | -2.981151 | -3.832436 |
| H | -5.311379 | -4.266157 | -0.038477 |
| H | -4.778748 | -4.749920 | -2.427927 |
| C | -4.966335 | 0.987140  | -0.041987 |
| H | -5.669686 | 0.316865  | 0.520821  |
| H | -5.450089 | 1.080375  | -1.056977 |
| O | -4.682120 | 2.151527  | 0.554778  |
| C | 2.115488  | -0.564051 | 1.404286  |
| H | 2.390812  | 0.312596  | 0.816910  |
| C | 3.021022  | -1.546790 | 1.581871  |
| H | 2.733256  | -2.447012 | 2.132268  |
| C | 4.396575  | -1.501236 | 1.064643  |
| C | 5.099492  | -2.697931 | 0.854882  |
| C | 5.033063  | -0.289850 | 0.747261  |
| C | 6.380136  | -2.688708 | 0.307980  |
| H | 4.618139  | -3.647511 | 1.100718  |
| C | 6.315497  | -0.279590 | 0.206101  |
| H | 4.521311  | 0.657534  | 0.929358  |
| C | 6.991629  | -1.478918 | -0.024015 |
| H | 6.903693  | -3.632149 | 0.138402  |
| H | 6.793165  | 0.672861  | -0.034727 |
| H | 7.995958  | -1.470087 | -0.452964 |
| C | 3.446063  | -1.050686 | -2.204236 |
| H | 3.261668  | -1.486079 | -3.199144 |
| H | 4.530878  | -0.945210 | -2.068617 |
| H | 3.074793  | -1.767014 | -1.456599 |
| C | 3.532102  | 3.996742  | -1.888974 |
| H | 4.034947  | 4.178828  | -2.851532 |
| H | 2.881034  | 4.857467  | -1.681796 |
| H | 4.313956  | 3.964250  | -1.115311 |
| H | 0.822078  | 3.656540  | -1.786138 |
| H | 0.780604  | -0.641757 | -2.065925 |
| C | -0.303029 | -2.519919 | -0.382309 |
| H | -1.202178 | -2.890478 | -0.900205 |
| C | 0.724707  | -3.306767 | -0.288710 |
| C | 1.813396  | -4.049150 | -0.162957 |
| H | 1.955701  | -4.710844 | 0.698034  |
| H | 2.600336  | -4.042421 | -0.924324 |

51

Figure\_S4-1\_9d(Na)-Cu-allenyl / electronic energy: -2839.0620575 a.u. / lowest freq: 14.37 cm<sup>-1</sup>

|    |           |           |           |
|----|-----------|-----------|-----------|
| C  | 1.401449  | -2.075087 | 0.781893  |
| H  | 1.679476  | -1.881296 | 1.831858  |
| C  | -0.006213 | -2.648365 | 0.652932  |
| H  | -0.062301 | -3.424044 | -0.128912 |
| C  | 0.006182  | -0.440008 | -0.139162 |
| C  | -2.189160 | -1.531257 | 0.133738  |
| C  | -2.845361 | -2.761728 | 0.235329  |
| C  | -2.951250 | -0.369985 | -0.075492 |
| C  | -4.240763 | -2.845245 | 0.119017  |
| C  | -4.334525 | -0.435941 | -0.206321 |
| C  | -4.972785 | -1.681355 | -0.104919 |
| H  | -6.061043 | -1.738645 | -0.201130 |
| Cu | -0.329372 | 1.490047  | -0.372686 |
| N  | 1.273764  | -0.812875 | 0.054580  |
| N  | -0.787308 | -1.470553 | 0.258845  |
| Na | 0.498306  | 3.958728  | 1.355621  |
| H  | -0.381218 | -3.078008 | 1.591814  |
| H  | 2.168593  | -2.723176 | 0.339289  |
| C  | 2.372398  | 0.146754  | -0.035438 |
| H  | 2.178954  | 0.736216  | -0.947149 |
| C  | 3.689483  | -0.579021 | -0.225630 |
| C  | 4.620192  | -0.739015 | 0.805951  |
| C  | 3.975802  | -1.139609 | -1.477409 |
| C  | 5.810682  | -1.435686 | 0.589342  |
| H  | 4.421442  | -0.318405 | 1.793568  |
| C  | 5.159152  | -1.840488 | -1.696033 |
| H  | 3.252345  | -1.025120 | -2.289480 |
| C  | 6.083241  | -1.989386 | -0.660216 |
| H  | 6.529017  | -1.546552 | 1.404836  |
| H  | 5.363247  | -2.270600 | -2.679186 |
| H  | 7.015148  | -2.533630 | -0.828612 |
| C  | 2.308388  | 1.165951  | 1.128058  |
| H  | 3.266929  | 1.737018  | 1.072498  |
| H  | 2.373701  | 0.583431  | 2.082237  |
| O  | 1.207712  | 1.962082  | 1.066314  |
| C  | -5.135842 | 0.816899  | -0.451875 |
| H  | -5.658483 | 0.763844  | -1.419613 |
| H  | -5.904556 | 0.954837  | 0.324125  |
| H  | -4.492476 | 1.707881  | -0.461773 |

|   |           |           |           |
|---|-----------|-----------|-----------|
| C | -4.919272 | -4.186120 | 0.236349  |
| H | -6.004229 | -4.101088 | 0.086278  |
| H | -4.527345 | -4.895642 | -0.508698 |
| H | -4.747592 | -4.631017 | 1.228910  |
| H | -2.283360 | -3.682514 | 0.397907  |
| H | -2.449009 | 0.596199  | -0.147487 |
| C | -1.307163 | 3.029167  | -1.145241 |
| H | -1.961130 | 2.829821  | -2.012024 |
| C | -1.311845 | 4.265224  | -0.742674 |
| C | -1.248636 | 5.503922  | -0.256051 |
| H | -0.536999 | 6.236564  | -0.653695 |
| H | -1.960491 | 5.856163  | 0.499142  |

51

Figure\_S4-1\_9b(Na)-Cu-allenyl / electronic energy: -2839.05552233 a.u. / lowest freq: 18.49 cm<sup>-1</sup>

|    |           |           |           |
|----|-----------|-----------|-----------|
| C  | -1.403505 | -1.447218 | -1.463778 |
| H  | -1.518968 | -0.926587 | -2.428424 |
| C  | -0.102320 | -2.249278 | -1.398621 |
| H  | -0.227521 | -3.213821 | -0.877881 |
| C  | 0.053653  | -0.375990 | -0.006245 |
| C  | 2.115590  | -1.646329 | -0.323692 |
| C  | 2.447529  | -2.278240 | 0.886897  |
| C  | 3.093354  | -1.289872 | -1.267445 |
| C  | 3.794134  | -2.560894 | 1.135970  |
| C  | 4.427961  | -1.594447 | -0.983886 |
| C  | 4.776145  | -2.227614 | 0.206801  |
| H  | 5.823692  | -2.456465 | 0.414766  |
| Cu | 0.843286  | 1.028000  | 1.058904  |
| N  | -1.218234 | -0.464888 | -0.392885 |
| N  | 0.750379  | -1.356185 | -0.608944 |
| Na | 0.955612  | 3.102468  | -1.264571 |
| H  | 0.329842  | -2.451327 | -2.388040 |
| H  | -2.298582 | -2.059781 | -1.291665 |
| C  | -2.190235 | 0.595041  | -0.173375 |
| H  | -1.850072 | 1.110871  | 0.740288  |
| C  | -3.556987 | -0.008997 | 0.105143  |
| C  | -4.706885 | 0.356784  | -0.601576 |
| C  | -3.677253 | -0.973578 | 1.116074  |
| C  | -5.942423 | -0.224050 | -0.305173 |
| H  | -4.649878 | 1.103012  | -1.395225 |
| C  | -4.905862 | -1.557315 | 1.412344  |
| H  | -2.783955 | -1.272241 | 1.671962  |
| C  | -6.047178 | -1.182627 | 0.699889  |
| H  | -6.828698 | 0.076027  | -0.869206 |
| H  | -4.975116 | -2.307462 | 2.203595  |
| H  | -7.013189 | -1.638603 | 0.927875  |
| C  | -2.105561 | 1.652949  | -1.307432 |
| H  | -2.876323 | 2.421016  | -1.032266 |
| H  | -2.526837 | 1.167141  | -2.231630 |
| O  | -0.866029 | 2.140611  | -1.461517 |
| C  | 1.722811  | 2.492968  | 1.972660  |
| H  | 1.936525  | 2.461721  | 3.053521  |
| C  | 2.118112  | 3.566313  | 1.350898  |
| C  | 2.487290  | 4.627547  | 0.641169  |
| H  | 1.831345  | 5.500129  | 0.544963  |
| H  | 3.482307  | 4.692597  | 0.187595  |
| H  | 5.202845  | -1.322373 | -1.704686 |
| H  | 4.072439  | -3.050469 | 2.072400  |
| C  | 1.385066  | -2.604535 | 1.901717  |
| H  | 0.998593  | -1.681347 | 2.362588  |
| H  | 0.524948  | -3.114869 | 1.443881  |
| H  | 1.783860  | -3.245588 | 2.698815  |
| C  | 2.712511  | -0.567453 | -2.531971 |
| H  | 2.063535  | -1.181523 | -3.174815 |
| H  | 2.155428  | 0.354222  | -2.305548 |
| H  | 3.604292  | -0.299794 | -3.114044 |

83

Figure\_S4-1\_PA-9b(Na)-pc(1,6major) / electronic energy: -3681.02455274 a.u. / lowest freq: 18.51 cm<sup>-1</sup>

|   |           |           |           |
|---|-----------|-----------|-----------|
| C | -3.233150 | 1.556543  | 1.456457  |
| H | -2.978288 | 2.346281  | 2.167852  |
| C | -1.078272 | 0.492669  | 1.955666  |
| H | -0.820455 | 1.360498  | 2.566626  |
| C | -2.372349 | 0.528797  | 1.300406  |
| H | -2.621831 | -0.293876 | 0.627314  |
| C | -0.255688 | -0.661270 | 2.091840  |
| C | -0.679628 | -2.056343 | 1.808114  |
| O | 0.079235  | -2.990575 | 1.632177  |
| C | 1.005529  | -0.539406 | 2.866248  |
| O | 1.641716  | -1.459886 | 3.339753  |
| O | 1.408451  | 0.726354  | 2.988212  |
| C | -4.524102 | 1.709208  | 0.772878  |
| C | -4.972433 | 0.816890  | -0.216806 |
| C | -6.202214 | 1.004256  | -0.840254 |
| C | -7.013938 | 2.086079  | -0.490981 |
| C | -6.581865 | 2.980879  | 0.487815  |
| C | -5.350056 | 2.793245  | 1.110780  |
| C | -1.787039 | 4.045388  | 0.189792  |
| H | -1.906285 | 4.644943  | 1.098124  |
| H | -2.553221 | 4.148624  | -0.585659 |
| C | -0.750861 | 3.239140  | 0.025612  |

|    |           |           |           |
|----|-----------|-----------|-----------|
| C  | 0.201043  | 2.371603  | -0.120736 |
| H  | 1.142116  | 2.686577  | -0.597937 |
| Cu | 0.184867  | 0.447050  | 0.371961  |
| C  | 1.241334  | -0.555655 | -0.967831 |
| N  | 2.556161  | -0.447351 | -1.107013 |
| N  | 0.768825  | -1.352332 | -1.942673 |
| C  | 3.419006  | 0.205999  | -0.139204 |
| C  | 3.084645  | -1.332582 | -2.150166 |
| H  | 3.578607  | -2.185069 | -1.659723 |
| C  | 1.813127  | -1.737242 | -2.899132 |
| H  | 1.678890  | -1.182285 | -3.842980 |
| C  | -0.608205 | -1.667330 | -2.123536 |
| C  | -1.493137 | -0.678631 | -2.591401 |
| C  | -1.042339 | -2.977426 | -1.846890 |
| C  | -2.847575 | -1.009705 | -2.710831 |
| C  | -2.401712 | -3.268651 | -1.995029 |
| C  | -3.301903 | -2.289438 | -2.406872 |
| H  | -4.362310 | -2.530162 | -2.510055 |
| Na | 2.416192  | -3.039939 | 1.763542  |
| H  | 1.776064  | -2.810338 | -3.127402 |
| H  | 3.812265  | -0.814136 | -2.789082 |
| O  | -1.997050 | -2.215168 | 1.802573  |
| C  | 2.648060  | 0.949287  | 3.649158  |
| H  | 2.593351  | 0.627278  | 4.698005  |
| H  | 2.828910  | 2.027200  | 3.590217  |
| H  | 3.454549  | 0.399142  | 3.143448  |
| C  | -2.501269 | -3.526131 | 1.586226  |
| H  | -2.109684 | -3.945019 | 0.651655  |
| H  | -3.589605 | -3.423758 | 1.526425  |
| H  | -2.226347 | -4.184156 | 2.422284  |
| H  | 2.774531  | 0.437247  | 0.724340  |
| C  | 3.986805  | 1.512409  | -0.658439 |
| C  | 4.814131  | 2.286476  | 0.168555  |
| C  | 3.690166  | 2.002093  | -1.935562 |
| C  | 5.340623  | 3.498320  | -0.274146 |
| H  | 5.038857  | 1.943645  | 1.181225  |
| C  | 4.216084  | 3.214885  | -2.382458 |
| H  | 3.018854  | 1.438822  | -2.586402 |
| C  | 5.047896  | 3.967048  | -1.555586 |
| H  | 5.979449  | 4.085321  | 0.389896  |
| H  | 3.966952  | 3.575631  | -3.383158 |
| H  | 5.459405  | 4.917223  | -1.903178 |
| C  | 4.485742  | -0.817867 | 0.370388  |
| H  | 5.067605  | -0.262753 | 1.152650  |
| H  | 5.223862  | -0.924578 | -0.475465 |
| O  | 3.938334  | -1.965277 | 0.786661  |
| H  | -5.013687 | 3.502012  | 1.871930  |
| H  | -4.350274 | -0.029882 | -0.513774 |
| H  | -7.207335 | 3.831730  | 0.767130  |
| H  | -6.530058 | 0.299597  | -1.608069 |
| H  | -7.978369 | 2.231133  | -0.982495 |
| C  | -1.013146 | 0.695735  | -2.969237 |
| H  | -0.933334 | 1.346879  | -2.085063 |
| H  | -0.016121 | 0.663007  | -3.431205 |
| H  | -1.709667 | 1.165922  | -3.676405 |
| C  | -0.069034 | -4.048072 | -1.433553 |
| H  | -0.577969 | -4.862251 | -0.900028 |
| H  | 0.418661  | -4.493105 | -2.315898 |
| H  | 0.715156  | -3.644621 | -0.780483 |
| H  | -3.550695 | -0.251077 | -3.063353 |
| H  | -2.757840 | -4.279775 | -1.782065 |

83

Figure\_S4-1\_PA-9b(Na)-ts(1,6major) / electronic energy: -3681.01420703 a.u. / lowest freq: -427.03 cm-1

|    |           |           |           |
|----|-----------|-----------|-----------|
| C  | 2.979277  | -1.816363 | 1.363890  |
| H  | 2.832953  | -2.499901 | 2.202407  |
| C  | 0.983754  | -0.583498 | 2.061507  |
| H  | 0.687994  | -1.482945 | 2.607573  |
| C  | 2.204575  | -0.653459 | 1.365698  |
| H  | 2.532869  | 0.207846  | 0.781962  |
| C  | 0.132807  | 0.567981  | 2.261009  |
| C  | 0.555516  | 1.959815  | 2.064348  |
| O  | -0.178914 | 2.937010  | 2.048099  |
| C  | -1.162905 | 0.359582  | 2.919903  |
| O  | -1.901175 | 1.216398  | 3.376497  |
| O  | -1.517300 | -0.936671 | 2.962522  |
| C  | 4.329569  | -1.851716 | 0.760541  |
| C  | 4.682883  | -1.022138 | -0.315747 |
| C  | 5.957777  | -1.080815 | -0.871037 |
| C  | 6.907086  | -1.972887 | -0.367128 |
| C  | 6.566688  | -2.806274 | 0.698073  |
| C  | 5.289634  | -2.746887 | 1.253825  |
| C  | 2.069231  | -3.442207 | 0.102650  |
| H  | 2.261290  | -4.216338 | 0.850501  |
| H  | 2.774336  | -3.409537 | -0.733773 |
| C  | 0.793982  | -3.030186 | -0.121012 |
| C  | -0.269149 | -2.357956 | -0.241579 |
| H  | -1.246278 | -2.540213 | -0.691663 |
| Cu | -0.175462 | -0.401482 | 0.359787  |
| C  | -1.144033 | 0.599950  | -1.032719 |

|    |           |           |           |
|----|-----------|-----------|-----------|
| N  | -2.457990 | 0.509661  | -1.204986 |
| N  | -0.638672 | 1.394818  | -1.990384 |
| C  | -3.354623 | -0.132049 | -0.259882 |
| C  | -2.947832 | 1.409435  | -2.255697 |
| H  | -3.435672 | 2.267963  | -1.769538 |
| C  | -1.652843 | 1.791478  | -2.974419 |
| H  | -1.504971 | 1.230046  | -3.912538 |
| C  | 0.743914  | 1.707881  | -2.131227 |
| C  | 1.624394  | 0.753087  | -2.667616 |
| C  | 1.181826  | 2.986763  | -1.742460 |
| C  | 2.976709  | 1.094986  | -2.779816 |
| C  | 2.540838  | 3.287647  | -1.871490 |
| C  | 3.433983  | 2.346862  | -2.378552 |
| H  | 4.493435  | 2.594870  | -2.472863 |
| Na | -2.500038 | 2.928818  | 1.919630  |
| H  | -1.592203 | 2.862329  | -3.208512 |
| H  | -3.670790 | 0.907902  | -2.913030 |
| O  | 1.874268  | 2.097145  | 1.908907  |
| C  | -2.790716 | -1.234933 | 3.511430  |
| H  | -2.834690 | -0.969064 | 4.576959  |
| H  | -2.929437 | -2.313857 | 3.385119  |
| H  | -3.580634 | -0.687293 | 2.976474  |
| C  | 2.385404  | 3.411637  | 1.760938  |
| H  | 1.910161  | 3.929061  | 0.918794  |
| H  | 3.458436  | 3.298031  | 1.573259  |
| H  | 2.222644  | 3.994940  | 2.678345  |
| H  | -2.747429 | -0.342183 | 0.636144  |
| C  | -3.895854 | -1.450235 | -0.775982 |
| C  | -4.702645 | -2.239439 | 0.057043  |
| C  | -3.597217 | -1.935173 | -2.054595 |
| C  | -5.205944 | -3.462897 | -0.379836 |
| H  | -4.928757 | -1.898010 | 1.069876  |
| C  | -4.099393 | -3.160548 | -2.495451 |
| H  | -2.943062 | -1.358256 | -2.711137 |
| C  | -4.909721 | -3.928399 | -1.661848 |
| H  | -5.829184 | -4.061357 | 0.288699  |
| H  | -3.849280 | -3.517918 | -3.497085 |
| H  | -5.302642 | -4.888063 | -2.004790 |
| C  | -4.448169 | 0.891868  | 0.192062  |
| H  | -5.064236 | 0.335170  | 0.947141  |
| H  | -5.144368 | 0.989581  | -0.689936 |
| O  | -3.925874 | 2.043648  | 0.626926  |
| H  | 5.029497  | -3.405910 | 2.086631  |
| H  | 3.948303  | -0.331158 | -0.735039 |
| H  | 7.300106  | -3.509664 | 1.099012  |
| H  | 6.211953  | -0.425913 | -1.708111 |
| H  | 7.905710  | -2.020504 | -0.806658 |
| C  | 1.138435  | -0.602947 | -3.100184 |
| H  | 0.985301  | -1.258390 | -2.229315 |
| H  | 0.174446  | -0.541526 | -3.625366 |
| H  | 1.866664  | -1.084682 | -3.766166 |
| C  | 0.208212  | 3.998497  | -1.199623 |
| H  | 0.728806  | 4.910812  | -0.878466 |
| H  | -0.532200 | 4.294608  | -1.957945 |
| H  | -0.343607 | 3.594945  | -0.338235 |
| H  | 3.677310  | 0.366478  | -3.195724 |
| H  | 2.901920  | 4.273721  | -1.568872 |

83

Figure\_S4-1\_PA-9b(Na)-prod(1,6major) / electronic energy: -3681.06325058 a.u. / lowest freq: -12.96 cm-1

|    |           |           |           |
|----|-----------|-----------|-----------|
| C  | -2.521540 | -1.968860 | -1.057975 |
| H  | -2.297148 | -2.585707 | -1.942263 |
| C  | -0.832825 | -0.415687 | -2.108395 |
| H  | -0.448278 | -1.313793 | -2.601455 |
| C  | -1.894029 | -0.603276 | -1.255327 |
| H  | -2.406042 | 0.252293  | -0.809724 |
| C  | -0.051633 | 0.789928  | -2.389487 |
| C  | -0.528407 | 2.135540  | -2.125147 |
| O  | 0.134563  | 3.168381  | -2.108413 |
| C  | 1.255304  | 0.634329  | -2.995665 |
| O  | 2.029307  | 1.522388  | -3.336054 |
| O  | 1.614616  | -0.660983 | -3.157826 |
| C  | -4.029541 | -1.881781 | -0.913334 |
| C  | -4.601267 | -1.077472 | 0.081651  |
| C  | -5.983869 | -1.005395 | 0.234848  |
| C  | -6.821785 | -1.739755 | -0.606356 |
| C  | -6.264091 | -2.543834 | -1.599149 |
| C  | -4.877757 | -2.613614 | -1.749313 |
| C  | -1.929997 | -2.720173 | 0.168541  |
| H  | -2.415230 | -3.704923 | 0.260790  |
| H  | -2.168557 | -2.160710 | 1.088545  |
| C  | -0.480193 | -2.897162 | 0.089124  |
| C  | 0.724496  | -3.006992 | 0.007418  |
| H  | 1.795982  | -3.105633 | -0.046957 |
| Cu | 0.055140  | -0.167273 | -0.254507 |
| C  | 1.043175  | 0.526788  | 1.250276  |
| N  | 2.364814  | 0.538423  | 1.357015  |
| N  | 0.514340  | 1.139506  | 2.319292  |
| C  | 3.257591  | 0.062661  | 0.314657  |
| C  | 2.824130  | 1.342838  | 2.495838  |

|    |           |           |           |
|----|-----------|-----------|-----------|
| H  | 3.234693  | 2.283179  | 2.097907  |
| C  | 1.530664  | 1.540375  | 3.296378  |
| H  | 1.480365  | 0.892303  | 4.187215  |
| C  | -0.891066 | 1.244986  | 2.519028  |
| C  | -1.594307 | 0.145410  | 3.037877  |
| C  | -1.532177 | 2.436887  | 2.149040  |
| C  | -2.980704 | 0.261465  | 3.178075  |
| C  | -2.920167 | 2.513646  | 2.301817  |
| C  | -3.638148 | 1.434443  | 2.811693  |
| H  | -4.722096 | 1.507633  | 2.924543  |
| Na | 2.422215  | 3.149641  | -1.730964 |
| H  | 1.384829  | 2.578815  | 3.624227  |
| H  | 3.605408  | 0.825190  | 3.068702  |
| O  | -1.849233 | 2.184790  | -1.874476 |
| C  | 2.882109  | -0.901903 | -3.737914 |
| H  | 2.910695  | -0.570006 | -4.786190 |
| H  | 3.041098  | -1.984997 | -3.685668 |
| H  | 3.675584  | -0.376787 | -3.186147 |
| C  | -2.429272 | 3.457487  | -1.658869 |
| H  | -1.933451 | 3.990490  | -0.837753 |
| H  | -3.479511 | 3.273136  | -1.405887 |
| H  | -2.368250 | 4.075050  | -2.566893 |
| H  | 2.641174  | -0.016990 | -0.596334 |
| C  | 3.816310  | -1.312558 | 0.612765  |
| C  | 4.486302  | -2.009509 | -0.402889 |
| C  | 3.658900  | -1.942710 | 1.852323  |
| C  | 4.984581  | -3.292866 | -0.187730 |
| H  | 4.602410  | -1.546028 | -1.385028 |
| C  | 4.159676  | -3.226661 | 2.073250  |
| H  | 3.111031  | -1.439771 | 2.651189  |
| C  | 4.824211  | -3.907917 | 1.054990  |
| H  | 5.494456  | -3.818432 | -0.998436 |
| H  | 4.019000  | -3.700264 | 3.047554  |
| H  | 5.210702  | -4.915071 | 1.225317  |
| C  | 4.327892  | 1.157225  | 0.001665  |
| H  | 4.958651  | 0.709508  | -0.812751 |
| H  | 5.019008  | 1.161320  | 0.893441  |
| O  | 3.775774  | 2.340915  | -0.288451 |
| H  | -4.448980 | -3.246147 | -2.531312 |
| H  | -3.959434 | -0.494635 | 0.747729  |
| H  | -6.910385 | -3.122394 | -2.263137 |
| H  | -6.408722 | -0.370347 | 1.015893  |
| H  | -7.906096 | -1.682987 | -0.487939 |
| C  | -0.868866 | -1.118871 | 3.414293  |
| H  | -0.333258 | -1.542164 | 2.550179  |
| H  | -0.116324 | -0.932544 | 4.195928  |
| H  | -1.568820 | -1.876139 | 3.791658  |
| C  | -0.734209 | 3.582102  | 1.587382  |
| H  | -1.377937 | 4.448355  | 1.384760  |
| H  | 0.052853  | 3.906353  | 2.284339  |
| H  | -0.232212 | 3.295098  | 0.649758  |
| H  | -3.550771 | -0.581966 | 3.575413  |
| H  | -3.441091 | 3.430469  | 2.015433  |

83

Figure\_S4-1\_PA-9d(Na)-prod(1,6minor) / electronic energy: -3681.07164701 a.u. / lowest freq: 12.05 cm<sup>-1</sup>

|    |           |           |           |
|----|-----------|-----------|-----------|
| C  | 3.415065  | -1.884314 | -0.298570 |
| H  | 4.009658  | -1.921787 | 0.623011  |
| C  | 2.325014  | -2.945123 | -0.397477 |
| H  | 2.578600  | -3.762686 | -1.084867 |
| C  | 1.377747  | -0.836544 | -0.715723 |
| C  | -0.050722 | -2.768048 | -1.208278 |
| C  | -0.287716 | -4.100791 | -0.869700 |
| C  | -1.055506 | -2.045670 | -1.871504 |
| C  | -1.529999 | -4.696919 | -1.125748 |
| C  | -2.300931 | -2.614233 | -2.120797 |
| C  | -2.531388 | -3.942465 | -1.734671 |
| H  | -3.506499 | -4.397669 | -1.929244 |
| Cu | 0.043245  | 0.610509  | -0.873840 |
| N  | 2.621837  | -0.650351 | -0.308314 |
| N  | 1.181538  | -2.167863 | -0.893321 |
| C  | -1.123470 | 0.227509  | 1.068154  |
| C  | -0.155054 | -0.010880 | 2.121942  |
| Na | 3.030411  | -0.741580 | 3.477587  |
| H  | 2.084735  | -3.376263 | 0.589365  |
| H  | 4.089487  | -1.906196 | -1.170934 |
| H  | -1.661109 | -0.680854 | 0.773938  |
| C  | 0.077202  | -1.378565 | 2.526209  |
| C  | 0.671169  | 1.009553  | 2.707125  |
| O  | -0.853282 | -2.241997 | 2.057316  |
| O  | 1.006244  | -1.813995 | 3.205319  |
| O  | 1.453477  | 0.896317  | 3.648906  |
| O  | 0.546330  | 2.219432  | 2.106144  |
| C  | 1.349025  | 3.267792  | 2.612535  |
| H  | 1.154137  | 3.444225  | 3.679730  |
| H  | 1.085378  | 4.160738  | 2.032945  |
| H  | 2.419011  | 3.042867  | 2.485368  |
| C  | -0.717137 | -3.599663 | 2.416923  |
| H  | 0.252633  | -4.008815 | 2.099107  |
| H  | -1.524571 | -4.132696 | 1.901723  |



|   |           |           |           |
|---|-----------|-----------|-----------|
| H | -0.813199 | -3.734151 | 3.504692  |
| C | 3.148917  | 0.667970  | 0.042753  |
| H | 2.435468  | 1.111366  | 0.754665  |
| C | 3.235467  | 1.571998  | -1.163502 |
| C | 3.665717  | 1.096706  | -2.408200 |
| C | 2.899547  | 2.924799  | -1.045520 |
| C | 3.746927  | 1.949919  | -3.508455 |
| H | 3.919166  | 0.040730  | -2.527151 |
| C | 2.980462  | 3.782592  | -2.142070 |
| H | 2.549101  | 3.305556  | -0.082783 |
| C | 3.403126  | 3.297143  | -3.379324 |
| H | 4.080249  | 1.559849  | -4.472991 |
| H | 2.704011  | 4.833372  | -2.030653 |
| H | 3.461020  | 3.964895  | -4.241652 |
| C | 4.496039  | 0.528507  | 0.815727  |
| H | 4.827593  | 1.591866  | 0.962282  |
| H | 5.229253  | 0.129916  | 0.055401  |
| O | 4.395684  | -0.199030 | 1.934417  |
| C | -1.522075 | 1.379864  | 0.428390  |
| H | -1.125979 | 2.342377  | 0.758151  |
| C | -2.705227 | 1.433720  | -0.521939 |
| H | -2.897374 | 0.417069  | -0.901189 |
| C | -3.983865 | 1.926971  | 0.131800  |
| C | -5.160929 | 1.177259  | 0.045903  |
| C | -4.016099 | 3.143227  | 0.827001  |
| C | -6.342639 | 1.627276  | 0.636849  |
| H | -5.152497 | 0.224021  | -0.489394 |
| C | -5.193397 | 3.596710  | 1.417667  |
| H | -3.107163 | 3.744330  | 0.915853  |
| C | -6.362658 | 2.839418  | 1.324522  |
| H | -7.251266 | 1.025843  | 0.559768  |
| H | -5.198173 | 4.546891  | 1.956553  |
| H | -7.285341 | 3.194301  | 1.788777  |
| C | -3.386931 | -1.814320 | -2.792131 |
| H | -2.998741 | -0.871411 | -3.202568 |
| H | -3.852415 | -2.379594 | -3.612979 |
| H | -4.186596 | -1.568225 | -2.075501 |
| C | -1.759852 | -6.134068 | -0.736362 |
| H | -1.528075 | -6.298560 | 0.327196  |
| H | -2.801590 | -6.436336 | -0.909219 |
| H | -1.109864 | -6.806460 | -1.317618 |
| H | 0.484361  | -4.692488 | -0.376330 |
| H | -0.854278 | -1.033615 | -2.224209 |
| C | 0.084280  | 1.653061  | -2.760185 |
| H | 0.986501  | 1.537817  | -3.343113 |
| C | -0.996623 | 1.928358  | -2.248005 |
| C | -2.319701 | 2.317222  | -1.731567 |
| H | -3.070848 | 2.254211  | -2.533809 |
| H | -2.267385 | 3.374027  | -1.422421 |

83

Figure\_S4-1\_PA-9d(Na)-ts(1,6minor) / electronic energy: -3681.01261478 a.u. / lowest freq: -459.96 cm-1

|    |           |           |           |
|----|-----------|-----------|-----------|
| C  | 3.659544  | 2.047246  | -0.366906 |
| H  | 4.051864  | 2.555127  | 0.522168  |
| C  | 4.175987  | 0.617260  | -0.516602 |
| H  | 4.864432  | 0.492678  | -1.363392 |
| C  | 1.838989  | 0.587570  | -0.437054 |
| C  | 2.960065  | -1.534459 | -0.968542 |
| C  | 4.149817  | -2.254209 | -0.824326 |
| C  | 1.799290  | -2.212280 | -1.368197 |
| C  | 4.182549  | -3.637772 | -1.048592 |
| C  | 1.805568  | -3.589583 | -1.566834 |
| C  | 3.006223  | -4.294472 | -1.407170 |
| H  | 3.021482  | -5.375544 | -1.571763 |
| Cu | -0.052747 | -0.026957 | -0.282358 |
| N  | 2.219273  | 1.832147  | -0.200960 |
| N  | 2.940741  | -0.148649 | -0.723460 |
| C  | -1.406247 | -1.192830 | 0.925565  |
| C  | -0.363215 | -0.625273 | 1.741140  |
| Na | 2.414098  | 1.220797  | 3.079838  |
| H  | 4.685482  | 0.268478  | 0.396785  |
| H  | 3.857266  | 2.662778  | -1.258609 |
| H  | -1.143551 | -2.164928 | 0.493393  |
| C  | 0.833419  | -1.426176 | 2.052715  |
| C  | -0.517378 | 0.625019  | 2.497523  |
| O  | 0.702309  | -2.713141 | 1.723429  |
| O  | 1.872805  | -1.002170 | 2.535225  |
| O  | 0.139354  | 0.959898  | 3.467674  |
| O  | -1.461712 | 1.436263  | 2.000773  |
| C  | -1.624071 | 2.695875  | 2.639351  |
| H  | -1.915876 | 2.567285  | 3.690473  |
| H  | -2.414555 | 3.214145  | 2.086305  |
| H  | -0.687394 | 3.271175  | 2.597527  |
| C  | 1.842622  | -3.542856 | 1.887734  |
| H  | 2.707214  | -3.128827 | 1.351460  |
| H  | 1.573747  | -4.516342 | 1.464302  |
| H  | 2.090698  | -3.650111 | 2.953172  |
| C  | 1.303488  | 2.899082  | 0.174318  |
| H  | 0.479763  | 2.409590  | 0.715767  |
| C  | 0.707716  | 3.616456  | -1.017868 |

|   |           |           |           |
|---|-----------|-----------|-----------|
| C | 1.158006  | 3.418929  | -2.327548 |
| C | -0.347302 | 4.515648  | -0.808469 |
| C | 0.580953  | 4.107297  | -3.395645 |
| H | 1.956395  | 2.701785  | -2.527988 |
| C | -0.925803 | 5.204561  | -1.872244 |
| H | -0.731667 | 4.667426  | 0.203412  |
| C | -0.460821 | 5.005697  | -3.172922 |
| H | 0.947875  | 3.934180  | -4.409995 |
| H | -1.749346 | 5.897443  | -1.684748 |
| H | -0.915430 | 5.540997  | -4.009344 |
| C | 2.011379  | 3.838889  | 1.205697  |
| H | 1.223260  | 4.586326  | 1.490204  |
| H | 2.737771  | 4.449566  | 0.595178  |
| O | 2.556483  | 3.168668  | 2.226204  |
| C | -2.750928 | -0.825870 | 0.784339  |
| H | -3.117401 | 0.064702  | 1.293180  |
| C | -3.585026 | -1.513435 | -0.096893 |
| H | -3.216921 | -2.481294 | -0.451129 |
| C | -5.062979 | -1.407082 | -0.042764 |
| C | -5.846104 | -2.486908 | -0.474925 |
| C | -5.717896 | -0.255163 | 0.421237  |
| C | -7.238474 | -2.427136 | -0.433246 |
| H | -5.353980 | -3.389598 | -0.846991 |
| C | -7.108018 | -0.193642 | 0.462069  |
| H | -5.135871 | 0.610796  | 0.744256  |
| C | -7.875891 | -1.280064 | 0.037321  |
| H | -7.827715 | -3.282881 | -0.770557 |
| H | -7.597389 | 0.712199  | 0.827015  |
| H | -8.966327 | -1.228993 | 0.070852  |
| C | 0.528144  | -4.306465 | -1.915511 |
| H | -0.224144 | -3.611830 | -2.315294 |
| H | 0.698584  | -5.101549 | -2.655583 |
| H | 0.098276  | -4.779192 | -1.017398 |
| C | 5.480189  | -4.387041 | -0.891376 |
| H | 5.911320  | -4.227961 | 0.108759  |
| H | 5.340563  | -5.466963 | -1.035210 |
| H | 6.224967  | -4.040376 | -1.624467 |
| H | 5.071431  | -1.751542 | -0.528467 |
| H | 0.876097  | -1.659899 | -1.549673 |
| C | -0.904423 | 0.218537  | -2.097521 |
| H | -0.241045 | 0.749398  | -2.781396 |
| C | -2.093103 | -0.199342 | -2.230770 |
| C | -3.362822 | -0.671765 | -2.113501 |
| H | -3.634098 | -1.595490 | -2.633831 |
| H | -4.165872 | 0.064162  | -2.015214 |

83

Figure\_S4-1\_PA-9d(Na)-pc(1,6minor) / electronic energy: -3681.02763302 a.u. / lowest freq: 8.16 cm-1

|    |           |           |           |
|----|-----------|-----------|-----------|
| C  | 3.283430  | 2.432864  | -0.167670 |
| H  | 3.550518  | 2.897574  | 0.790005  |
| C  | 3.997739  | 1.097056  | -0.392375 |
| H  | 4.652012  | 1.098760  | -1.276078 |
| C  | 1.682210  | 0.743791  | -0.347367 |
| C  | 3.091100  | -1.193730 | -0.896784 |
| C  | 4.357694  | -1.769390 | -0.732595 |
| C  | 2.047530  | -1.977377 | -1.402378 |
| C  | 4.576485  | -3.115641 | -1.044982 |
| C  | 2.238643  | -3.328673 | -1.688100 |
| C  | 3.508123  | -3.887591 | -1.510230 |
| H  | 3.669281  | -4.944912 | -1.739455 |
| Cu | -0.106559 | -0.138747 | -0.253299 |
| N  | 1.875396  | 2.033145  | -0.132411 |
| N  | 2.883576  | 0.160900  | -0.575885 |
| C  | -1.307549 | -1.381515 | 0.855694  |
| C  | -0.299121 | -0.823990 | 1.682302  |
| Na | 2.241492  | 1.142203  | 3.234214  |
| H  | 4.603404  | 0.807209  | 0.480249  |
| H  | 3.463599  | 3.158516  | -0.975065 |
| H  | -1.059303 | -2.358851 | 0.428473  |
| C  | 0.959501  | -1.571041 | 1.950493  |
| C  | -0.546288 | 0.320303  | 2.606187  |
| O  | 0.905960  | -2.839818 | 1.570037  |
| O  | 1.958066  | -1.085128 | 2.449578  |
| O  | -0.032602 | 0.435237  | 3.698614  |
| O  | -1.388255 | 1.221910  | 2.116827  |
| C  | -1.578263 | 2.405039  | 2.898087  |
| H  | -2.065104 | 2.160633  | 3.851967  |
| H  | -2.225287 | 3.052492  | 2.297013  |
| H  | -0.594432 | 2.868183  | 3.071700  |
| C  | 2.090587  | -3.613219 | 1.721894  |
| H  | 2.939606  | -3.121647 | 1.229463  |
| H  | 1.886582  | -4.577131 | 1.244960  |
| H  | 2.315223  | -3.757275 | 2.787871  |
| C  | 0.816131  | 2.977513  | 0.181516  |
| H  | -0.045153 | 2.363561  | 0.485631  |
| C  | 0.401074  | 3.807353  | -1.019143 |
| C  | 0.944473  | 3.611072  | -2.294208 |
| C  | -0.592703 | 4.786382  | -0.870530 |
| C  | 0.527149  | 4.380066  | -3.381544 |
| H  | 1.693314  | 2.832826  | -2.453286 |

|   |           |           |           |
|---|-----------|-----------|-----------|
| C | -1.012372 | 5.554907  | -1.954242 |
| H | -1.058076 | 4.941328  | 0.105412  |
| C | -0.449657 | 5.359599  | -3.216064 |
| H | 0.968215  | 4.205856  | -4.365700 |
| H | -1.790043 | 6.309141  | -1.812681 |
| H | -0.778812 | 5.960932  | -4.066363 |
| C | 1.235869  | 3.800090  | 1.440229  |
| H | 0.353348  | 4.451262  | 1.669972  |
| H | 2.014747  | 4.531435  | 1.084938  |
| O | 1.620053  | 3.010699  | 2.452923  |
| C | -2.721438 | -1.047817 | 0.816490  |
| H | -3.031184 | -0.093774 | 1.243289  |
| C | -3.615784 | -1.875050 | 0.240212  |
| H | -3.251913 | -2.817213 | -0.180417 |
| C | -5.058032 | -1.637211 | 0.094729  |
| C | -5.838262 | -2.589258 | -0.581970 |
| C | -5.699545 | -0.490502 | 0.595214  |
| C | -7.208242 | -2.404946 | -0.757136 |
| H | -5.356708 | -3.485571 | -0.981688 |
| C | -7.067781 | -0.307017 | 0.423215  |
| H | -5.124548 | 0.270584  | 1.126364  |
| C | -7.829128 | -1.262197 | -0.254360 |
| H | -7.793290 | -3.157643 | -1.290224 |
| H | -7.545739 | 0.591022  | 0.820820  |
| H | -8.902392 | -1.113443 | -0.390641 |
| C | 1.073363  | -4.166717 | -2.143860 |
| H | 0.288826  | -3.546352 | -2.600150 |
| H | 1.382640  | -4.933756 | -2.867872 |
| H | 0.620122  | -4.686449 | -1.283850 |
| C | 5.946586  | -3.723682 | -0.890026 |
| H | 6.598467  | -3.100181 | -0.262663 |
| H | 5.887948  | -4.724552 | -0.438186 |
| H | 6.434968  | -3.837088 | -1.870996 |
| H | 5.191189  | -1.177428 | -0.352493 |
| H | 1.073348  | -1.529360 | -1.606668 |
| C | -1.031479 | -0.008244 | -1.993800 |
| H | -0.774107 | 0.861007  | -2.618160 |
| C | -1.839622 | -0.898592 | -2.486115 |
| C | -2.669042 | -1.833454 | -2.920223 |
| H | -2.308361 | -2.707240 | -3.473510 |
| H | -3.747959 | -1.749604 | -2.751795 |

51

Figure\_S4-1\_9d(Na)-Cu-allenyl / electronic energy: -2839.06020575 a.u. / lowest freq: 14.37 cm<sup>-1</sup>

|    |           |           |           |
|----|-----------|-----------|-----------|
| C  | 1.401449  | -2.075087 | 0.781893  |
| H  | 1.679476  | -1.881296 | 1.831858  |
| C  | -0.006213 | -2.648365 | 0.652932  |
| H  | -0.062301 | -3.424044 | -0.128912 |
| C  | 0.006182  | -0.440008 | -0.139162 |
| C  | -2.189160 | -1.531257 | 0.133738  |
| C  | -2.845361 | -2.761728 | 0.235329  |
| C  | -2.951250 | -0.369985 | -0.075492 |
| C  | -4.240763 | -2.845245 | 0.119017  |
| C  | -4.334525 | -0.435941 | -0.206321 |
| C  | -4.972785 | -1.681355 | -0.104919 |
| H  | -6.061043 | -1.738645 | -0.201130 |
| Cu | -0.329372 | 1.490047  | -0.372686 |
| N  | 1.273764  | -0.812875 | 0.054580  |
| N  | -0.787308 | -1.470553 | 0.258845  |
| Na | 0.498306  | 3.958728  | 1.355621  |
| H  | -0.381218 | -3.078008 | 1.591814  |
| H  | 2.168593  | -2.723176 | 0.339289  |
| C  | 2.372398  | 0.146754  | -0.035438 |
| H  | 2.178954  | 0.736216  | -0.947149 |
| C  | 3.689483  | -0.579021 | -0.225630 |
| C  | 4.620192  | -0.739015 | 0.805951  |
| C  | 3.975802  | -1.139609 | -1.477409 |
| C  | 5.810682  | -1.435686 | 0.589342  |
| H  | 4.421442  | -0.318405 | 1.793568  |
| C  | 5.159152  | -1.840488 | -1.696033 |
| H  | 3.252345  | -1.025120 | -2.289480 |
| C  | 6.083241  | -1.989386 | -0.660216 |
| H  | 6.529017  | -1.546552 | 1.404836  |
| H  | 5.363247  | -2.270600 | -2.679186 |
| H  | 7.015148  | -2.533630 | -0.828612 |
| C  | 2.308388  | 1.165951  | 1.128058  |
| H  | 3.266929  | 1.737018  | 1.072498  |
| H  | 2.373701  | 0.583431  | 2.082237  |
| O  | 1.207712  | 1.962082  | 1.066314  |
| C  | -5.135842 | 0.816899  | -0.451875 |
| H  | -5.658483 | 0.763844  | -1.419613 |
| H  | -5.904556 | 0.954837  | 0.324125  |
| H  | -4.492476 | 1.707881  | -0.461773 |
| C  | -4.919272 | -4.186120 | 0.236349  |
| H  | -6.004229 | -4.101088 | 0.086278  |
| H  | -4.527345 | -4.895642 | -0.508698 |
| H  | -4.747592 | -4.631017 | 1.228910  |
| H  | -2.283360 | -3.682514 | 0.397907  |
| H  | -2.449009 | 0.596199  | -0.147487 |
| C  | -1.307163 | 3.029167  | -1.145241 |

|   |           |          |           |
|---|-----------|----------|-----------|
| H | -1.961130 | 2.829821 | -2.012024 |
| C | -1.311845 | 4.265224 | -0.742674 |
| C | -1.248636 | 5.503922 | -0.256051 |
| H | -0.536999 | 6.236564 | -0.653695 |
| H | -1.960491 | 5.856163 | 0.499142  |

51

Figure\_S4-1\_9b(Na)-Cu-allenyl / electronic energy: -2839.05552233 a.u. / lowest freq: 18.49 cm-1

|    |           |           |           |
|----|-----------|-----------|-----------|
| C  | -1.403505 | -1.447218 | -1.463778 |
| H  | -1.518968 | -0.926587 | -2.428424 |
| C  | -0.102320 | -2.249278 | -1.398621 |
| H  | -0.227521 | -3.213821 | -0.877881 |
| C  | 0.053653  | -0.375990 | -0.006245 |
| C  | 2.115590  | -1.646329 | -0.323692 |
| C  | 2.447529  | -2.278240 | 0.886897  |
| C  | 3.093354  | -1.289872 | -1.267445 |
| C  | 3.794134  | -2.560894 | 1.135970  |
| C  | 4.427961  | -1.594447 | -0.983886 |
| C  | 4.776145  | -2.227614 | 0.206801  |
| H  | 5.823692  | -2.456465 | 0.414766  |
| Cu | 0.843286  | 1.028000  | 1.058904  |
| N  | -1.218234 | -0.464888 | -0.392885 |
| N  | 0.750379  | -1.356185 | -0.608944 |
| Na | 0.955612  | 3.102468  | -1.264571 |
| H  | 0.329842  | -2.451327 | -2.388040 |
| H  | -2.298582 | -2.059781 | -1.291665 |
| C  | -2.190235 | 0.595041  | -0.173375 |
| H  | -1.850072 | 1.110871  | 0.740288  |
| C  | -3.556987 | -0.008997 | 0.105143  |
| C  | -4.706885 | 0.356784  | -0.601576 |
| C  | -3.677253 | -0.973578 | 1.116074  |
| C  | -5.942423 | -0.224050 | -0.305173 |
| H  | -4.649878 | 1.103012  | -1.395225 |
| C  | -4.905862 | -1.557315 | 1.412344  |
| H  | -2.783955 | -1.272241 | 1.671962  |
| C  | -6.047178 | -1.182627 | 0.699889  |
| H  | -6.828698 | 0.076027  | -0.869206 |
| H  | -4.975116 | -2.307462 | 2.203595  |
| H  | -7.013189 | -1.638603 | 0.927875  |
| C  | -2.105561 | 1.652949  | -1.307432 |
| H  | -2.876323 | 2.421016  | -1.032266 |
| H  | -2.526837 | 1.167141  | -2.231630 |
| O  | -0.866029 | 2.140611  | -1.461517 |
| C  | 1.722811  | 2.492968  | 1.972660  |
| H  | 1.936525  | 2.461721  | 3.053521  |
| C  | 2.118112  | 3.566313  | 1.350898  |
| C  | 2.487290  | 4.627547  | 0.641169  |
| H  | 1.831345  | 5.500129  | 0.544963  |
| H  | 3.482307  | 4.692597  | 0.187595  |
| H  | 5.202845  | -1.322373 | -1.704686 |
| H  | 4.072439  | -3.050469 | 2.072400  |
| C  | 1.385066  | -2.604535 | 1.901717  |
| H  | 0.998593  | -1.681347 | 2.362588  |
| H  | 0.524948  | -3.114869 | 1.443881  |
| H  | 1.783860  | -3.245588 | 2.698815  |
| C  | 2.712511  | -0.567453 | -2.531971 |
| H  | 2.063535  | -1.181523 | -3.174815 |
| H  | 2.155428  | 0.354222  | -2.305548 |
| H  | 3.604292  | -0.299794 | -3.114044 |

83

Figure\_S4-1\_PA-9b(Na)-pc(1,6minor) / electronic energy: -3681.02166482 a.u. / lowest freq: 4.07 cm-1

|    |           |           |           |
|----|-----------|-----------|-----------|
| C  | 2.892491  | 2.672219  | -0.559859 |
| H  | 3.338014  | 2.967650  | 0.403230  |
| C  | 3.696536  | 1.576655  | -1.253095 |
| H  | 3.744769  | 1.714396  | -2.346290 |
| C  | 1.679758  | 0.686200  | -0.476223 |
| C  | 3.447436  | -0.910188 | -1.210973 |
| C  | 4.458660  | -1.397745 | -0.362500 |
| C  | 3.054572  | -1.613731 | -2.365361 |
| C  | 5.077533  | -2.608674 | -0.690970 |
| C  | 3.681590  | -2.832627 | -2.642833 |
| C  | 4.692752  | -3.323126 | -1.820397 |
| H  | 5.181415  | -4.269721 | -2.061152 |
| Cu | -0.001155 | -0.388816 | -0.338393 |
| N  | 1.610345  | 2.008238  | -0.324133 |
| N  | 2.906806  | 0.379665  | -0.940386 |
| C  | -1.244655 | -1.760666 | 0.529609  |
| C  | -0.197357 | -1.423350 | 1.430429  |
| Na | 2.355710  | 0.117136  | 3.203400  |
| H  | 4.724266  | 1.489708  | -0.875574 |
| H  | 2.771522  | 3.568033  | -1.182866 |
| H  | -1.049448 | -2.646495 | -0.083016 |
| C  | 1.037462  | -2.246912 | 1.469019  |
| C  | -0.404029 | -0.519403 | 2.596185  |
| O  | 0.951250  | -3.335397 | 0.711469  |
| O  | 2.044412  | -1.973183 | 2.096327  |
| O  | 0.141340  | -0.658774 | 3.671625  |
| O  | -1.273608 | 0.454666  | 2.363209  |
| C  | -1.459923 | 1.401536  | 3.413113  |
| H  | -1.886098 | 0.914780  | 4.301012  |

|   |           |           |           |
|---|-----------|-----------|-----------|
| H | -2.156173 | 2.149425  | 3.019258  |
| H | -0.486233 | 1.852331  | 3.649631  |
| C | 2.096345  | -4.173536 | 0.633608  |
| H | 2.972061  | -3.603398 | 0.301922  |
| H | 1.852157  | -4.950819 | -0.097723 |
| H | 2.304971  | -4.628450 | 1.612091  |
| C | 0.559803  | 2.654857  | 0.454174  |
| H | -0.198095 | 1.875233  | 0.614871  |
| C | -0.098953 | 3.792501  | -0.295620 |
| C | 0.497675  | 5.055008  | -0.414648 |
| C | -1.355389 | 3.593679  | -0.883404 |
| C | -0.138359 | 6.084038  | -1.109936 |
| H | 1.469557  | 5.244045  | 0.046952  |
| C | -1.994863 | 4.619865  | -1.577186 |
| H | -1.831910 | 2.612630  | -0.801611 |
| C | -1.386273 | 5.869887  | -1.694573 |
| H | 0.344230  | 7.060674  | -1.192834 |
| H | -2.973097 | 4.441904  | -2.029805 |
| H | -1.884498 | 6.676383  | -2.237478 |
| C | 1.093947  | 3.017260  | 1.869398  |
| H | 0.210712  | 3.496801  | 2.372659  |
| H | 1.814120  | 3.870573  | 1.743180  |
| O | 1.607062  | 1.957969  | 2.511084  |
| C | -2.646169 | -1.381305 | 0.603507  |
| H | -2.907154 | -0.508974 | 1.201401  |
| C | -3.594050 | -2.067304 | -0.064900 |
| H | -3.292742 | -2.948650 | -0.639196 |
| C | -5.030168 | -1.756702 | -0.097631 |
| C | -5.907068 | -2.658576 | -0.722293 |
| C | -5.572171 | -0.585510 | 0.460193  |
| C | -7.276454 | -2.409060 | -0.780332 |
| H | -5.502389 | -3.569718 | -1.170757 |
| C | -6.939882 | -0.335518 | 0.402958  |
| H | -4.917442 | 0.146684  | 0.936981  |
| C | -7.799451 | -1.245960 | -0.215971 |
| H | -7.938569 | -3.125788 | -1.271220 |
| H | -7.340026 | 0.581437  | 0.841462  |
| H | -8.872110 | -1.045921 | -0.262237 |
| C | -0.997033 | 0.108031  | -1.978001 |
| H | -0.617101 | 1.017183  | -2.469335 |
| C | -1.981643 | -0.516419 | -2.551519 |
| C | -2.986257 | -1.191639 | -3.082564 |
| H | -2.814614 | -1.995104 | -3.806788 |
| H | -4.024078 | -0.960788 | -2.821084 |
| C | 4.901763  | -0.648180 | 0.865674  |
| H | 5.006893  | -1.336511 | 1.715910  |
| H | 5.882048  | -0.172541 | 0.703274  |
| H | 4.191160  | 0.140685  | 1.139199  |
| C | 2.006838  | -1.062701 | -3.291664 |
| H | 0.998408  | -1.161698 | -2.861908 |
| H | 2.159558  | 0.010925  | -3.475919 |
| H | 2.022005  | -1.587475 | -4.255984 |
| H | 3.385987  | -3.390320 | -3.534884 |
| H | 5.864794  | -2.996936 | -0.039925 |

83

Figure\_S4-1\_PA-9b(Na)-ts(1,6minor) / electronic energy: -3681.00662586 a.u. / lowest freq: -473.73 cm<sup>-1</sup>

|    |           |           |           |
|----|-----------|-----------|-----------|
| C  | 3.186998  | 2.460131  | -0.440560 |
| H  | 3.647008  | 2.672480  | 0.537318  |
| C  | 3.879383  | 1.307115  | -1.162490 |
| H  | 3.958625  | 1.473301  | -2.250094 |
| C  | 1.766979  | 0.614601  | -0.437847 |
| C  | 3.340236  | -1.134927 | -1.249282 |
| C  | 4.272016  | -1.803179 | -0.433424 |
| C  | 2.869931  | -1.709438 | -2.445763 |
| C  | 4.732775  | -3.060109 | -0.840604 |
| C  | 3.334204  | -2.979947 | -2.799618 |
| C  | 4.266660  | -3.648033 | -2.011241 |
| H  | 4.632013  | -4.632387 | -2.312038 |
| Cu | 0.005988  | -0.317213 | -0.311251 |
| N  | 1.837946  | 1.930352  | -0.237902 |
| C  | 2.960739  | 0.192986  | -0.898364 |
| C  | -1.406904 | -1.719397 | 0.496445  |
| C  | -0.338186 | -1.474598 | 1.431045  |
| Na | 2.341076  | -0.067471 | 3.032442  |
| H  | 4.886791  | 1.097454  | -0.777504 |
| H  | 3.170785  | 3.383701  | -1.034047 |
| H  | -1.200541 | -2.531888 | -0.208867 |
| C  | 0.813034  | -2.386857 | 1.470565  |
| C  | -0.466059 | -0.542969 | 2.564299  |
| O  | 0.639655  | -3.476778 | 0.715868  |
| O  | 1.851190  | -2.204395 | 2.089225  |
| O  | 0.131983  | -0.633268 | 3.621496  |
| O  | -1.312435 | 0.465320  | 2.332683  |
| C  | -1.369839 | 1.478520  | 3.332246  |
| H  | -1.776586 | 1.076378  | 4.270802  |
| H  | -2.035574 | 2.252660  | 2.934780  |
| H  | -0.356385 | 1.872741  | 3.495396  |
| C  | 1.717096  | -4.396078 | 0.640149  |
| H  | 2.625415  | -3.905373 | 0.270039  |

|   |           |           |           |
|---|-----------|-----------|-----------|
| H | 1.401022  | -5.176326 | -0.060710 |
| H | 1.919875  | -4.837944 | 1.626102  |
| C | 0.844982  | 2.670435  | 0.535769  |
| H | 0.035196  | 1.949400  | 0.719185  |
| C | 0.262938  | 3.838181  | -0.231649 |
| C | 0.955183  | 5.044749  | -0.404170 |
| C | -1.021970 | 3.726903  | -0.779375 |
| C | 0.384259  | 6.100928  | -1.115569 |
| H | 1.949721  | 5.171299  | 0.029685  |
| C | -1.595640 | 4.779306  | -1.490778 |
| H | -1.573371 | 2.791475  | -0.653319 |
| C | -0.891689 | 5.971171  | -1.663722 |
| H | 0.939063  | 7.034003  | -1.238620 |
| H | -2.596754 | 4.666556  | -1.913580 |
| H | -1.337755 | 6.798924  | -2.219723 |
| C | 1.417019  | 3.020451  | 1.939439  |
| H | 0.572881  | 3.569196  | 2.440717  |
| H | 2.192472  | 3.820797  | 1.789144  |
| O | 1.860067  | 1.939278  | 2.594087  |
| C | -2.731472 | -1.262023 | 0.507844  |
| H | -3.036623 | -0.538517 | 1.262916  |
| C | -3.620363 | -1.624213 | -0.506240 |
| H | -3.318081 | -2.475297 | -1.124353 |
| C | -5.090644 | -1.472624 | -0.366693 |
| C | -5.940889 | -2.321331 | -1.089755 |
| C | -5.671629 | -0.494421 | 0.455571  |
| C | -7.326841 | -2.207031 | -0.988907 |
| H | -5.506790 | -3.084553 | -1.741503 |
| C | -7.055394 | -0.378967 | 0.557214  |
| H | -5.036689 | 0.192861  | 1.018626  |
| C | -7.890623 | -1.234940 | -0.163654 |
| H | -7.968862 | -2.881076 | -1.560515 |
| H | -7.486341 | 0.388587  | 1.204128  |
| H | -8.975644 | -1.141062 | -0.082307 |
| C | -0.895449 | 0.434790  | -1.979520 |
| H | -0.217607 | 1.113147  | -2.497991 |
| C | -2.104730 | 0.136683  | -2.208382 |
| C | -3.399554 | -0.282023 | -2.185872 |
| H | -3.737853 | -0.995740 | -2.943565 |
| H | -4.151942 | 0.443970  | -1.863978 |
| C | 4.778701  | -1.220415 | 0.859287  |
| H | 4.533305  | -1.895982 | 1.691826  |
| H | 5.872084  | -1.099274 | 0.835471  |
| H | 4.332969  | -0.241959 | 1.073633  |
| C | 1.898989  | -0.988383 | -3.339136 |
| H | 0.863420  | -1.133116 | -2.995777 |
| H | 2.080238  | 0.095521  | -3.350399 |
| H | 1.967479  | -1.364020 | -4.368824 |
| H | 2.973754  | -3.438463 | -3.723688 |
| H | 5.458275  | -3.587110 | -0.215691 |

83

Figure\_S4-1\_PA-9b(Na)-prod(1,6minor) / electronic energy: -3681.06430128 a.u. / lowest freq: 21.21 cm-1

|    |           |           |           |
|----|-----------|-----------|-----------|
| C  | 3.226157  | 2.141462  | -1.115406 |
| H  | 3.943756  | 1.730487  | -1.844991 |
| C  | 1.981494  | 2.723116  | -1.797822 |
| H  | 1.688978  | 3.692407  | -1.364389 |
| C  | 1.391008  | 0.782632  | -0.624078 |
| C  | -0.298759 | 1.641830  | -2.154522 |
| C  | -0.513121 | 0.638893  | -3.118299 |
| C  | -1.297637 | 2.575156  | -1.829407 |
| C  | -1.768487 | 0.561614  | -3.726573 |
| C  | -2.538511 | 2.465131  | -2.466118 |
| C  | -2.778369 | 1.461819  | -3.399903 |
| H  | -3.755507 | 1.385035  | -3.881485 |
| Cu | 0.727416  | -0.992562 | -0.169907 |
| N  | 2.657275  | 1.064482  | -0.297718 |
| N  | 0.969858  | 1.699739  | -1.510828 |
| C  | -1.832112 | -0.930816 | 0.325892  |
| C  | -1.007297 | -2.154727 | 0.207894  |
| Na | 1.722544  | -4.072152 | -0.364496 |
| H  | 2.110097  | 2.856500  | -2.881147 |
| H  | 3.758336  | 2.878133  | -0.499223 |
| H  | -1.978565 | -0.430436 | -0.637937 |
| C  | -1.026691 | -2.860215 | -1.072021 |
| C  | -0.459206 | -2.885928 | 1.343647  |
| O  | -1.945656 | -2.371570 | -1.926840 |
| O  | -0.315058 | -3.798815 | -1.422414 |
| O  | 0.164962  | -3.944930 | 1.312347  |
| O  | -0.666072 | -2.280433 | 2.528386  |
| C  | -0.062042 | -2.869405 | 3.663606  |
| H  | -0.423501 | -3.895259 | 3.822619  |
| H  | -0.340791 | -2.239227 | 4.516116  |
| H  | 1.032967  | -2.892798 | 3.561061  |
| C  | -1.995492 | -2.955462 | -3.213147 |
| H  | -1.046635 | -2.813036 | -3.750952 |
| H  | -2.807559 | -2.448853 | -3.746901 |
| H  | -2.204184 | -4.032903 | -3.151169 |
| C  | 3.467274  | 0.113806  | 0.477977  |
| H  | 2.892873  | -0.106924 | 1.392953  |

|   |           |           |           |
|---|-----------|-----------|-----------|
| C | 4.777656  | 0.746094  | 0.896361  |
| C | 5.903650  | 0.725237  | 0.063418  |
| C | 4.879234  | 1.384680  | 2.137464  |
| C | 7.095318  | 1.330880  | 0.459253  |
| H | 5.851430  | 0.231706  | -0.909704 |
| C | 6.068752  | 1.993048  | 2.537302  |
| H | 4.012983  | 1.400747  | 2.804840  |
| C | 7.181330  | 1.969093  | 1.696754  |
| H | 7.962506  | 1.304350  | -0.204532 |
| H | 6.127590  | 2.484714  | 3.510828  |
| H | 8.114788  | 2.444019  | 2.006567  |
| C | 3.622840  | -1.255723 | -0.242825 |
| H | 4.473482  | -1.761433 | 0.270156  |
| H | 3.991107  | -1.034868 | -1.276301 |
| O | 2.490694  | -2.019847 | -0.236841 |
| C | -2.359744 | -0.313360 | 1.396369  |
| H | -2.271147 | -0.746939 | 2.393636  |
| C | -2.967105 | 1.063827  | 1.304523  |
| H | -2.717889 | 1.480979  | 0.316702  |
| C | -4.480645 | 1.074848  | 1.433977  |
| C | -5.271727 | 1.678986  | 0.451536  |
| C | -5.119626 | 0.491838  | 2.536722  |
| C | -6.662841 | 1.706451  | 0.565075  |
| H | -4.788117 | 2.129077  | -0.419676 |
| C | -6.507655 | 0.517726  | 2.655519  |
| H | -4.523516 | 0.003363  | 3.312454  |
| C | -7.285909 | 1.127196  | 1.669209  |
| H | -7.261519 | 2.182200  | -0.215373 |
| H | -6.986267 | 0.056915  | 3.522892  |
| H | -8.374130 | 1.147637  | 1.762034  |
| C | 0.325043  | 2.048681  | 2.283820  |
| H | 1.396509  | 2.054139  | 2.202301  |
| C | -0.883914 | 2.037046  | 2.340177  |
| C | -2.346797 | 2.000976  | 2.374523  |
| H | -2.742993 | 3.021919  | 2.247473  |
| H | -2.666728 | 1.668513  | 3.376652  |
| C | 0.580645  | -0.324556 | -3.494071 |
| H | 0.338216  | -0.846002 | -4.429804 |
| H | 1.543446  | 0.191514  | -3.622838 |
| H | 0.739795  | -1.082851 | -2.709355 |
| C | -1.053489 | 3.665547  | -0.822685 |
| H | -0.428978 | 3.308217  | 0.006673  |
| H | -0.544233 | 4.526410  | -1.286111 |
| H | -2.002005 | 4.033138  | -0.406428 |
| H | -3.327043 | 3.180343  | -2.217631 |
| H | -1.950815 | -0.212290 | -4.475386 |

108

Figure\_S5-1\_AA-9d(Na)-prod(1,6major) / electronic energy: -4131.89053036 a.u. / lowest freq: 23.01 cm-1

|    |           |           |           |
|----|-----------|-----------|-----------|
| C  | 1.412694  | -3.982468 | -0.477634 |
| H  | 1.932082  | -4.393047 | 0.397398  |
| C  | -0.077024 | -4.291398 | -0.475407 |
| H  | -0.361500 | -5.015731 | -1.250216 |
| C  | 0.237305  | -1.971147 | -0.611470 |
| C  | -2.052778 | -2.864936 | -0.985002 |
| C  | -2.884293 | -3.967813 | -0.744251 |
| C  | -2.619191 | -1.691529 | -1.494510 |
| C  | -4.259116 | -3.899775 | -0.987148 |
| C  | -3.994015 | -1.593622 | -1.717744 |
| C  | -4.802202 | -2.707448 | -1.467068 |
| H  | -5.878454 | -2.639691 | -1.647541 |
| Cu | -0.021678 | 0.013066  | -0.656219 |
| N  | 1.433164  | -2.521871 | -0.446746 |
| N  | -0.671724 | -2.977894 | -0.740783 |
| C  | -0.797907 | 1.094405  | 1.406915  |
| C  | -0.841372 | 0.042940  | 2.381899  |
| Na | 0.392136  | -2.831366 | 3.318224  |
| H  | -0.421336 | -4.674529 | 0.499060  |
| H  | 1.911517  | -4.347530 | -1.387892 |
| H  | -0.048062 | 1.861720  | 1.629521  |
| C  | -1.858276 | -0.989630 | 2.389275  |
| C  | 0.161364  | -0.002041 | 3.418949  |
| O  | -2.998258 | -0.630022 | 1.768234  |
| O  | -1.773402 | -2.107151 | 2.893727  |
| O  | 0.207868  | -0.791452 | 4.358783  |
| O  | 1.106489  | 0.965204  | 3.322379  |
| C  | 2.195019  | 0.847642  | 4.220049  |
| H  | 1.857435  | 0.853751  | 5.265889  |
| H  | 2.841066  | 1.714124  | 4.035754  |
| H  | 2.741223  | -0.085648 | 4.017711  |
| C  | -4.056441 | -1.568410 | 1.764836  |
| H  | -3.735728 | -2.526887 | 1.336107  |
| H  | -4.848191 | -1.133522 | 1.144380  |
| H  | -4.431618 | -1.739082 | 2.784993  |
| C  | 2.651646  | -1.801782 | -0.090881 |
| H  | 2.357407  | -0.742276 | -0.062150 |
| C  | 3.757830  | -1.966968 | -1.117480 |
| C  | 4.420905  | -3.189301 | -1.307445 |
| C  | 4.182505  | -0.866505 | -1.873486 |
| C  | 5.451152  | -3.311068 | -2.239894 |

|   |           |           |           |
|---|-----------|-----------|-----------|
| H | 4.145570  | -4.064047 | -0.715996 |
| C | 5.217069  | -0.983172 | -2.802195 |
| H | 3.705954  | 0.103687  | -1.720208 |
| C | 5.852499  | -2.208938 | -2.994194 |
| H | 5.947516  | -4.275240 | -2.372199 |
| H | 5.527198  | -0.106719 | -3.376374 |
| H | 6.659970  | -2.304627 | -3.723637 |
| C | 3.097173  | -2.199094 | 1.356599  |
| H | 3.945515  | -1.491537 | 1.569046  |
| H | 3.616024  | -3.193663 | 1.253880  |
| O | 2.104531  | -2.186212 | 2.245485  |
| C | 0.698238  | 0.713011  | -2.592305 |
| H | -0.003328 | 0.299564  | -3.323226 |
| H | 1.710743  | 0.302913  | -2.623406 |
| C | 0.406237  | 1.811045  | -1.825015 |
| C | -0.921583 | 2.560631  | -1.889178 |
| H | -0.669709 | 3.587150  | -2.209331 |
| C | -1.903837 | 1.996682  | -2.907280 |
| H | -1.476545 | 2.005154  | -3.920556 |
| H | -2.184832 | 0.961368  | -2.672402 |
| H | -2.828571 | 2.589344  | -2.926091 |
| C | -1.531256 | 1.315976  | 0.259607  |
| H | -2.358221 | 0.641956  | 0.028121  |
| C | -1.504096 | 2.659714  | -0.444949 |
| H | -0.799228 | 3.293712  | 0.111390  |
| C | -2.844951 | 3.384293  | -0.403115 |
| C | -2.966501 | 4.659217  | -0.978039 |
| C | -3.976958 | 2.834894  | 0.210273  |
| C | -4.176084 | 5.348737  | -0.961923 |
| H | -2.095691 | 5.124663  | -1.447159 |
| C | -5.192756 | 3.522712  | 0.227813  |
| H | -3.910304 | 1.860457  | 0.697231  |
| C | -5.301190 | 4.779192  | -0.362166 |
| H | -4.241611 | 6.338794  | -1.419369 |
| H | -6.060465 | 3.068326  | 0.712064  |
| H | -6.252321 | 5.316038  | -0.349942 |
| C | -4.595699 | -0.309759 | -2.227004 |
| H | -4.241082 | -0.078232 | -3.243020 |
| H | -5.691837 | -0.370503 | -2.260100 |
| H | -4.321781 | 0.541837  | -1.585153 |
| C | -5.134298 | -5.087570 | -0.682778 |
| H | -6.123700 | -4.987467 | -1.149623 |
| H | -4.677516 | -6.022723 | -1.038405 |
| H | -5.285732 | -5.190629 | 0.403680  |
| H | -2.474528 | -4.896760 | -0.347685 |
| H | -1.972061 | -0.846760 | -1.729125 |
| B | 1.574300  | 2.417592  | -0.964465 |
| O | 1.425713  | 3.418652  | -0.054397 |
| O | 2.861846  | 1.974043  | -1.053448 |
| C | 2.731465  | 3.794223  | 0.433354  |
| C | 3.613634  | 2.546099  | 0.038839  |
| C | 5.011226  | 2.883758  | -0.457011 |
| H | 4.985863  | 3.524808  | -1.346987 |
| H | 5.585327  | 3.394926  | 0.329653  |
| H | 5.541090  | 1.956146  | -0.717345 |
| C | 3.687298  | 1.482920  | 1.130090  |
| H | 2.688466  | 1.174753  | 1.473388  |
| H | 4.200166  | 0.596942  | 0.730964  |
| H | 4.260729  | 1.840072  | 1.996444  |
| C | 2.623476  | 4.044706  | 1.929136  |
| H | 2.009845  | 4.938375  | 2.111309  |
| H | 2.148228  | 3.195893  | 2.437129  |
| H | 3.616595  | 4.217190  | 2.369324  |
| C | 3.125160  | 5.072976  | -0.301258 |
| H | 4.087873  | 5.461347  | 0.059618  |
| H | 3.197762  | 4.908026  | -1.385887 |
| H | 2.355644  | 5.837419  | -0.123020 |

108

Figure\_S5-1\_AA-9d(Na)-ts(1,6major) / electronic energy: -4131.84208395 a.u. / lowest freq: -388.75 cm<sup>-1</sup>

|    |           |           |           |
|----|-----------|-----------|-----------|
| C  | -2.711428 | -3.560318 | -1.132305 |
| H  | -2.940555 | -4.392337 | -0.455983 |
| C  | -3.822044 | -2.516706 | -1.175235 |
| H  | -4.381319 | -2.522257 | -2.120455 |
| C  | -1.802443 | -1.482480 | -0.602707 |
| C  | -3.716520 | -0.015060 | -1.150647 |
| C  | -5.117856 | 0.045520  | -1.100061 |
| C  | -2.992944 | 1.160810  | -1.370541 |
| C  | -5.791194 | 1.256658  | -1.264968 |
| C  | -3.650939 | 2.385091  | -1.527585 |
| C  | -5.045495 | 2.420104  | -1.479188 |
| H  | -5.563011 | 3.375465  | -1.603033 |
| Cu | -0.439091 | -0.167115 | 0.015113  |
| N  | -1.575823 | -2.788080 | -0.629088 |
| N  | -3.077685 | -1.262639 | -1.013789 |
| C  | 0.291728  | 1.125930  | 1.468171  |
| C  | -0.772780 | 0.338840  | 2.044785  |
| Na | -2.895378 | -2.343495 | 2.760611  |
| H  | -4.538826 | -2.645827 | -0.347872 |
| H  | -2.482812 | -3.963920 | -2.130610 |



|   |           |           |           |
|---|-----------|-----------|-----------|
| H | 1.292282  | 0.740652  | 1.688668  |
| C | -2.190886 | 0.724592  | 2.110135  |
| C | -0.403830 | -0.808671 | 2.891926  |
| O | -2.423783 | 2.007660  | 1.827688  |
| O | -3.113091 | -0.033989 | 2.371073  |
| O | -1.084498 | -1.260615 | 3.795464  |
| O | 0.788673  | -1.342336 | 2.595678  |
| C | 1.119918  | -2.532643 | 3.306770  |
| H | 1.273412  | -2.319422 | 4.374091  |
| H | 2.050045  | -2.899797 | 2.862028  |
| H | 0.306457  | -3.262190 | 3.179765  |
| C | -3.779397 | 2.430074  | 1.825288  |
| H | -4.391841 | 1.778338  | 1.188916  |
| H | -3.778538 | 3.450142  | 1.425814  |
| H | -4.185106 | 2.425348  | 2.847135  |
| C | -0.396587 | -3.433138 | -0.055809 |
| H | 0.156777  | -2.619573 | 0.435653  |
| C | 0.509425  | -4.065965 | -1.088689 |
| C | 0.113697  | -5.164826 | -1.865135 |
| C | 1.810875  | -3.577008 | -1.249803 |
| C | 0.986779  | -5.735439 | -2.792025 |
| H | -0.883258 | -5.593867 | -1.743935 |
| C | 2.685025  | -4.142105 | -2.176962 |
| H | 2.152393  | -2.725057 | -0.658608 |
| C | 2.274613  | -5.223836 | -2.955281 |
| H | 0.657605  | -6.588742 | -3.389761 |
| H | 3.687218  | -3.722584 | -2.291455 |
| H | 2.954823  | -5.668397 | -3.685396 |
| C | -0.830002 | -4.414434 | 1.075110  |
| H | 0.150020  | -4.780473 | 1.489969  |
| H | -1.246107 | -5.326425 | 0.561704  |
| O | -1.652875 | -3.853165 | 1.964925  |
| C | 0.822483  | -0.011040 | -1.639409 |
| H | 0.077293  | 0.283313  | -2.390232 |
| H | 1.052317  | -1.082375 | -1.669123 |
| C | 1.910067  | 0.867157  | -1.402852 |
| C | 1.836518  | 2.242102  | -1.627255 |
| H | 2.777802  | 2.795811  | -1.600745 |
| C | 0.705249  | 2.854033  | -2.395762 |
| H | 0.645384  | 2.446417  | -3.420227 |
| H | -0.257424 | 2.632002  | -1.909175 |
| H | 0.801225  | 3.945902  | -2.469218 |
| C | 0.264652  | 2.415375  | 0.896415  |
| H | -0.697708 | 2.904028  | 0.755150  |
| C | 1.439172  | 3.026760  | 0.473743  |
| H | 2.379378  | 2.570306  | 0.790077  |
| C | 1.545697  | 4.467074  | 0.162051  |
| C | 2.820178  | 5.032955  | -0.010463 |
| C | 0.430656  | 5.309280  | 0.027744  |
| C | 2.976406  | 6.382773  | -0.313412 |
| H | 3.700017  | 4.391303  | 0.091286  |
| C | 0.584028  | 6.659849  | -0.277325 |
| H | -0.574727 | 4.909557  | 0.169458  |
| C | 1.856624  | 7.204735  | -0.451628 |
| H | 3.978803  | 6.797776  | -0.442119 |
| H | -0.300443 | 7.293606  | -0.375782 |
| H | 1.976010  | 8.264327  | -0.687734 |
| C | -2.859170 | 3.645640  | -1.749864 |
| H | -2.328461 | 3.618546  | -2.713672 |
| H | -3.505951 | 4.533297  | -1.743514 |
| H | -2.096966 | 3.771127  | -0.967396 |
| C | -7.296253 | 1.311504  | -1.225679 |
| H | -7.646217 | 2.167711  | -0.630719 |
| H | -7.708889 | 1.430530  | -2.240169 |
| H | -7.724662 | 0.395764  | -0.795613 |
| H | -5.702509 | -0.857679 | -0.923482 |
| H | -1.904206 | 1.124885  | -1.436150 |
| B | 3.212845  | 0.333471  | -0.734838 |
| O | 4.088291  | 1.142500  | -0.055571 |
| O | 3.621695  | -0.974140 | -0.739793 |
| C | 5.269041  | 0.376300  | 0.243014  |
| C | 4.731333  | -1.101132 | 0.169044  |
| C | 5.720025  | -2.112219 | -0.390335 |
| H | 6.009007  | -1.869222 | -1.420635 |
| H | 6.626905  | -2.150982 | 0.231366  |
| H | 5.264774  | -3.113121 | -0.389931 |
| C | 4.163126  | -1.602277 | 1.494787  |
| H | 3.416057  | -0.905582 | 1.902650  |
| H | 3.666328  | -2.567336 | 1.319421  |
| H | 4.952744  | -1.754517 | 2.243763  |
| C | 5.795395  | 0.793317  | 1.607106  |
| H | 6.150585  | 1.833027  | 1.565445  |
| H | 5.015138  | 0.729706  | 2.376080  |
| H | 6.640080  | 0.155805  | 1.907801  |
| C | 6.295329  | 0.694273  | -0.843383 |
| H | 7.252426  | 0.187867  | -0.655677 |
| H | 5.929881  | 0.396781  | -1.837088 |
| H | 6.474539  | 1.778812  | -0.857786 |

Figure\_S5-1\_AA-9d(Na)-pc(1,6major) / electronic energy: -4131.84678962 a.u. / lowest freq: 18.68 cm-1

|    |           |           |           |
|----|-----------|-----------|-----------|
| C  | -1.371062 | -4.174545 | -1.111776 |
| H  | -1.381890 | -4.969934 | -0.356999 |
| C  | -2.752660 | -3.544859 | -1.306379 |
| H  | -3.156029 | -3.684950 | -2.319340 |
| C  | -1.244812 | -1.906117 | -0.585995 |
| C  | -3.504150 | -1.148953 | -1.206812 |
| C  | -4.846589 | -1.546155 | -1.259604 |
| C  | -3.188798 | 0.207606  | -1.348457 |
| C  | -5.866461 | -0.606949 | -1.437478 |
| C  | -4.195381 | 1.160716  | -1.516695 |
| C  | -5.528258 | 0.742800  | -1.565188 |
| H  | -6.319245 | 1.485279  | -1.702461 |
| Cu | -0.386966 | -0.231643 | 0.043240  |
| N  | -0.575582 | -3.046781 | -0.624751 |
| N  | -2.499639 | -2.123097 | -1.043193 |
| C  | -0.069760 | 1.123871  | 1.513162  |
| C  | -0.859499 | 0.043654  | 2.036771  |
| Na | -2.069776 | -3.200260 | 2.701714  |
| H  | -3.485363 | -3.943913 | -0.587932 |
| H  | -0.944895 | -4.574440 | -2.044540 |
| H  | 0.995992  | 1.052733  | 1.752528  |
| C  | -2.339226 | -0.030211 | 2.079578  |
| C  | -0.185378 | -0.949916 | 2.909672  |
| O  | -2.956987 | 1.124733  | 1.846459  |
| O  | -2.971077 | -1.052944 | 2.282443  |
| O  | -0.734733 | -1.565120 | 3.802637  |
| O  | 1.115081  | -1.099766 | 2.660412  |
| C  | 1.774127  | -2.108849 | 3.424634  |
| H  | 1.801292  | -1.832585 | 4.487801  |
| H  | 2.791387  | -2.170956 | 3.025715  |
| H  | 1.237356  | -3.059418 | 3.291301  |
| C  | -4.378782 | 1.098534  | 1.816484  |
| H  | -4.738374 | 0.317666  | 1.133993  |
| H  | -4.691949 | 2.084940  | 1.457967  |
| H  | -4.778671 | 0.917661  | 2.824117  |
| C  | 0.747544  | -3.241138 | -0.051603 |
| H  | 0.980965  | -2.301510 | 0.475384  |
| C  | 1.815846  | -3.461031 | -1.107443 |
| C  | 3.094749  | -3.901868 | -0.736393 |
| C  | 1.587606  | -3.177560 | -2.459013 |
| C  | 4.107279  | -4.049720 | -1.682657 |
| H  | 3.311432  | -4.122011 | 0.310536  |
| C  | 2.598771  | -3.322851 | -3.408511 |
| H  | 0.607619  | -2.814586 | -2.775575 |
| C  | 3.865111  | -3.759092 | -3.025045 |
| H  | 5.095284  | -4.392270 | -1.365533 |
| H  | 2.394045  | -3.086985 | -4.455274 |
| H  | 4.659236  | -3.869284 | -3.766701 |
| C  | 0.656499  | -4.348264 | 1.048093  |
| H  | 1.666143  | -4.356166 | 1.533471  |
| H  | 0.623884  | -5.329506 | 0.495462  |
| O  | -0.357003 | -4.142986 | 1.897574  |
| C  | 0.643519  | 0.332020  | -1.601657 |
| H  | -0.129969 | 0.427660  | -2.380763 |
| H  | 1.199415  | -0.606050 | -1.745366 |
| C  | 1.522087  | 1.489073  | -1.455484 |
| C  | 1.168824  | 2.760551  | -1.778585 |
| H  | 1.892653  | 3.564612  | -1.614498 |
| C  | -0.154408 | 3.125818  | -2.377537 |
| H  | -0.312398 | 2.648137  | -3.361148 |
| H  | -0.974786 | 2.776651  | -1.726748 |
| H  | -0.267623 | 4.211643  | -2.503263 |
| C  | -0.495804 | 2.445986  | 1.111403  |
| H  | -1.561904 | 2.618180  | 0.969224  |
| C  | 0.403676  | 3.432994  | 0.889354  |
| H  | 1.463514  | 3.219348  | 1.054705  |
| C  | 0.092561  | 4.808730  | 0.480949  |
| C  | 1.149137  | 5.710125  | 0.268709  |
| C  | -1.218226 | 5.270212  | 0.271881  |
| C  | 0.910014  | 7.017116  | -0.147887 |
| H  | 2.175656  | 5.366184  | 0.422024  |
| C  | -1.459465 | 6.576342  | -0.144122 |
| H  | -2.065329 | 4.601354  | 0.435775  |
| C  | -0.397396 | 7.456813  | -0.359350 |
| H  | 1.749189  | 7.697268  | -0.310895 |
| H  | -2.487251 | 6.910975  | -0.302784 |
| H  | -0.588480 | 8.480758  | -0.687694 |
| C  | -3.834761 | 2.616249  | -1.650488 |
| H  | -3.313724 | 2.809964  | -2.600656 |
| H  | -4.725359 | 3.258253  | -1.615099 |
| H  | -3.154374 | 2.925429  | -0.843415 |
| C  | -7.307270 | -1.047527 | -1.452573 |
| H  | -7.941821 | -0.325551 | -1.984943 |
| H  | -7.422634 | -2.029379 | -1.933649 |
| H  | -7.697646 | -1.137793 | -0.426046 |
| H  | -5.113882 | -2.598609 | -1.156454 |
| H  | -2.146235 | 0.530467  | -1.347328 |
| B  | 2.910368  | 1.234439  | -0.804242 |

|   |          |           |           |
|---|----------|-----------|-----------|
| O | 3.573427 | 2.124989  | 0.005157  |
| O | 3.597167 | 0.058059  | -0.947385 |
| C | 4.886342 | 1.595472  | 0.265743  |
| C | 4.687357 | 0.058113  | -0.014330 |
| C | 5.881992 | -0.639049 | -0.646380 |
| H | 6.148559 | -0.189046 | -1.610889 |
| H | 6.756086 | -0.592651 | 0.020366  |
| H | 5.635313 | -1.696163 | -0.822214 |
| C | 4.212286 | -0.718985 | 1.211065  |
| H | 3.336486 | -0.239026 | 1.670895  |
| H | 3.909333 | -1.725000 | 0.885873  |
| H | 5.003247 | -0.817809 | 1.968137  |
| C | 5.280858 | 1.931888  | 1.695513  |
| H | 5.400780 | 3.019536  | 1.803747  |
| H | 4.519201 | 1.599683  | 2.412292  |
| H | 6.238528 | 1.455627  | 1.953308  |
| C | 5.844943 | 2.264163  | -0.718529 |
| H | 6.884963 | 1.954921  | -0.542503 |
| H | 5.580207 | 2.026782  | -1.759254 |
| H | 5.781404 | 3.354381  | -0.591285 |

76

Figure\_S5-1\_9d(Na)-Cu-allyl / electronic energy: -3289.87323919 a.u. / lowest freq: 20.48 cm-1

|    |           |           |           |
|----|-----------|-----------|-----------|
| C  | 2.890494  | 1.919481  | -1.277302 |
| H  | 3.212834  | 1.619009  | -2.282905 |
| C  | 1.580347  | 2.708660  | -1.287786 |
| H  | 1.715166  | 3.773396  | -1.053559 |
| C  | 1.361334  | 0.845889  | 0.116302  |
| C  | -0.476920 | 2.468998  | 0.143962  |
| C  | -1.201053 | 3.344915  | -0.672658 |
| C  | -1.049124 | 2.021662  | 1.341390  |
| C  | -2.500751 | 3.731098  | -0.327753 |
| C  | -2.353152 | 2.373080  | 1.688914  |
| C  | -3.068439 | 3.232389  | 0.847613  |
| H  | -4.088296 | 3.522016  | 1.116164  |
| Cu | 0.549243  | -0.521771 | 1.237838  |
| N  | 2.543033  | 0.749000  | -0.472014 |
| N  | 0.804179  | 2.032970  | -0.243867 |
| H  | 1.066715  | 2.629079  | -2.259433 |
| H  | 3.717911  | 2.468759  | -0.801157 |
| C  | 3.344698  | -0.463934 | -0.515154 |
| H  | 2.901187  | -1.123898 | 0.249271  |
| C  | 4.775968  | -0.154327 | -0.107352 |
| C  | 5.877692  | -0.460143 | -0.912213 |
| C  | 5.005969  | 0.459152  | 1.132365  |
| C  | 7.175180  | -0.164497 | -0.487241 |
| H  | 5.732823  | -0.936167 | -1.883022 |
| C  | 6.297285  | 0.758235  | 1.558327  |
| H  | 4.151927  | 0.706681  | 1.769782  |
| C  | 7.389916  | 0.445116  | 0.746743  |
| H  | 8.022928  | -0.413557 | -1.129804 |
| H  | 6.453595  | 1.234919  | 2.528793  |
| H  | 8.405182  | 0.675575  | 1.077400  |
| C  | 3.137215  | -1.190296 | -1.873781 |
| H  | 3.774689  | -2.111853 | -1.794461 |
| H  | 3.662176  | -0.569468 | -2.653477 |
| O  | 1.845948  | -1.423998 | -2.140698 |
| C  | -0.451569 | -1.910882 | 2.208955  |
| H  | -1.214664 | -1.404047 | 2.822373  |
| H  | 0.177713  | -2.546649 | 2.852851  |
| C  | -1.044927 | -2.620703 | 1.056533  |
| C  | -0.492142 | -3.711033 | 0.455359  |
| H  | -0.988980 | -4.153163 | -0.417369 |
| C  | 0.787250  | -4.340968 | 0.920790  |
| H  | 1.118695  | -5.149002 | 0.253404  |
| H  | 1.593059  | -3.583472 | 0.969365  |
| H  | 0.701537  | -4.758930 | 1.940091  |
| B  | -2.306527 | -1.993764 | 0.382957  |
| O  | -3.373025 | -1.412180 | 1.004517  |
| O  | -2.415671 | -1.921873 | -0.995612 |
| C  | -4.386992 | -1.159047 | 0.008097  |
| C  | -3.540932 | -1.073394 | -1.313835 |
| C  | -5.133677 | 0.116193  | 0.360060  |
| C  | -5.338535 | -2.354768 | 0.029500  |
| C  | -4.233816 | -1.613380 | -2.553791 |
| C  | -2.982138 | 0.323768  | -1.572158 |
| H  | -4.479589 | -2.677383 | -2.447888 |
| H  | -3.576969 | -1.498793 | -3.428337 |
| H  | -5.161058 | -1.055202 | -2.750289 |
| H  | -4.818196 | -3.287688 | -0.232540 |
| H  | -6.175828 | -2.213317 | -0.667972 |
| H  | -5.748118 | -2.466329 | 1.043327  |
| H  | -2.476565 | 0.722952  | -0.681484 |
| H  | -3.773968 | 1.028313  | -1.862331 |
| H  | -2.252056 | 0.281035  | -2.394600 |
| H  | -4.449481 | 0.965059  | 0.476018  |
| H  | -5.678059 | -0.021758 | 1.305057  |
| H  | -5.865158 | 0.358733  | -0.425131 |
| Na | -0.132379 | -1.871828 | -1.732083 |
| C  | -3.288355 | 4.628767  | -1.246136 |

|   |           |          |           |
|---|-----------|----------|-----------|
| H | -4.131202 | 5.101149 | -0.723105 |
| H | -2.656663 | 5.421816 | -1.671818 |
| H | -3.701543 | 4.052122 | -2.089506 |
| C | -2.973914 | 1.790798 | 2.930585  |
| H | -2.277050 | 1.825374 | 3.780685  |
| H | -3.894667 | 2.320460 | 3.211548  |
| H | -3.228022 | 0.732756 | 2.756237  |
| H | -0.769050 | 3.721967 | -1.600967 |
| H | -0.472166 | 1.385437 | 2.015110  |

76

Figure\_S5-1\_9b(Na)-Cu-allyl / electronic energy: -3289.86902565 a.u. / lowest freq: 17.54 cm-1

|    |           |           |           |
|----|-----------|-----------|-----------|
| C  | -2.892697 | 1.596089  | 1.460941  |
| H  | -2.743197 | 1.250407  | 2.497136  |
| C  | -1.975473 | 2.766074  | 1.108473  |
| H  | -2.463374 | 3.496160  | 0.440338  |
| C  | -1.249374 | 0.839069  | 0.001489  |
| C  | 0.301145  | 2.736026  | -0.016190 |
| C  | 1.264409  | 3.038492  | 0.964267  |
| C  | 0.499150  | 3.065316  | -1.370203 |
| C  | 2.449274  | 3.661177  | 0.561084  |
| C  | 1.705816  | 3.672713  | -1.732198 |
| C  | 2.674483  | 3.968356  | -0.777657 |
| H  | 3.610370  | 4.443824  | -1.078925 |
| Cu | -0.251244 | -0.335231 | -1.174432 |
| N  | -2.441060 | 0.564339  | 0.526560  |
| N  | -0.895934 | 2.082234  | 0.388527  |
| H  | -1.606803 | 3.302977  | 1.991271  |
| H  | -3.958000 | 1.822171  | 1.319187  |
| C  | -3.044007 | -0.760576 | 0.519412  |
| H  | -2.554189 | -1.289301 | -0.315468 |
| C  | -4.525217 | -0.639770 | 0.199869  |
| C  | -5.531197 | -1.041691 | 1.083724  |
| C  | -4.902867 | -0.081480 | -1.029569 |
| C  | -6.878729 | -0.890279 | 0.747507  |
| H  | -5.271410 | -1.477151 | 2.049741  |
| C  | -6.244395 | 0.073098  | -1.368072 |
| H  | -4.124350 | 0.241321  | -1.727003 |
| C  | -7.240224 | -0.331892 | -0.476378 |
| H  | -7.649523 | -1.209649 | 1.452726  |
| H  | -6.515806 | 0.510614  | -2.331627 |
| H  | -8.294305 | -0.210547 | -0.735919 |
| C  | -2.663657 | -1.551289 | 1.799213  |
| H  | -3.213957 | -2.525298 | 1.696342  |
| H  | -3.180113 | -1.041428 | 2.659897  |
| O  | -1.336986 | -1.673655 | 1.957204  |
| C  | 0.761487  | -1.541323 | -2.354457 |
| H  | 1.475351  | -0.912042 | -2.911363 |
| H  | 0.108200  | -2.075043 | -3.064880 |
| C  | 1.441426  | -2.424103 | -1.385089 |
| C  | 0.988711  | -3.644270 | -0.986354 |
| H  | 1.556486  | -4.204231 | -0.232322 |
| C  | -0.265528 | -4.273060 | -1.519961 |
| H  | -0.471331 | -5.246949 | -1.053546 |
| H  | -1.139388 | -3.618105 | -1.339556 |
| H  | -0.221274 | -4.425144 | -2.613314 |
| B  | 2.674857  | -1.814147 | -0.650999 |
| O  | 3.578781  | -0.949566 | -1.188422 |
| O  | 2.893022  | -2.014555 | 0.702220  |
| C  | 4.592362  | -0.671470 | -0.204792 |
| C  | 3.868051  | -1.044195 | 1.142553  |
| C  | 4.996463  | 0.790230  | -0.319960 |
| C  | 5.781401  | -1.578686 | -0.516488 |
| C  | 4.764620  | -1.674238 | 2.195354  |
| C  | 3.081412  | 0.121336  | 1.736282  |
| H  | 5.219611  | -2.605750 | 1.836445  |
| H  | 4.178808  | -1.903760 | 3.097250  |
| H  | 5.566555  | -0.977538 | 2.480470  |
| H  | 5.509876  | -2.641027 | -0.432057 |
| H  | 6.626269  | -1.378286 | 0.157165  |
| H  | 6.109124  | -1.392230 | -1.548824 |
| H  | 2.392039  | 0.553077  | 0.995092  |
| H  | 3.746843  | 0.918937  | 2.094387  |
| H  | 2.489884  | -0.230057 | 2.595248  |
| H  | 4.125398  | 1.455965  | -0.267177 |
| H  | 5.494789  | 0.958336  | -1.285293 |
| H  | 5.701406  | 1.061643  | 0.480029  |
| Na | 0.603802  | -2.265300 | 1.509716  |
| H  | 1.879983  | 3.924594  | -2.781112 |
| H  | 3.211577  | 3.891914  | 1.309483  |
| C  | -0.547128 | 2.775810  | -2.413076 |
| H  | -0.507148 | 1.718738  | -2.725077 |
| H  | -1.561952 | 2.956715  | -2.031076 |
| H  | -0.390961 | 3.397087  | -3.304993 |
| C  | 1.037472  | 2.696278  | 2.412516  |
| H  | 0.431839  | 3.466996  | 2.916158  |
| H  | 0.508160  | 1.738685  | 2.519469  |
| H  | 1.991775  | 2.629837  | 2.951304  |

108

Figure\_S5-1\_AA-9b(Na)-pc(1,6major) / electronic energy: -4131.84106861 a.u. / lowest freq: 14.01 cm-1

|    |           |           |           |
|----|-----------|-----------|-----------|
| C  | 4.426624  | -0.599879 | -1.594332 |
| H  | 5.233006  | -0.953550 | -0.935369 |
| C  | 3.746449  | -1.740194 | -2.363359 |
| H  | 3.618848  | -1.515235 | -3.433921 |
| C  | 2.250518  | -0.839589 | -0.796342 |
| C  | 1.501349  | -2.860306 | -1.938086 |
| C  | 1.446861  | -3.924376 | -1.019720 |
| C  | 0.670233  | -2.813539 | -3.068032 |
| C  | 0.464773  | -4.901569 | -1.194914 |
| C  | -0.293998 | -3.817530 | -3.214690 |
| C  | -0.411611 | -4.838848 | -2.277434 |
| H  | -1.179878 | -5.605363 | -2.400958 |
| Cu | 0.497995  | -0.449048 | 0.084791  |
| N  | 3.339933  | -0.086400 | -0.757895 |
| N  | 2.443465  | -1.821591 | -1.697421 |
| C  | -0.895977 | -0.361032 | 1.541517  |
| C  | 0.349372  | -0.749297 | 2.171439  |
| Na | 3.793395  | -1.367060 | 3.007562  |
| H  | 4.287745  | -2.693815 | -2.279660 |
| H  | 4.817706  | 0.184999  | -2.257265 |
| H  | -1.143828 | 0.697374  | 1.655822  |
| C  | 0.705312  | -2.125874 | 2.565811  |
| C  | 1.171799  | 0.316752  | 2.778999  |
| O  | -0.260090 | -3.018269 | 2.342537  |
| O  | 1.768196  | -2.478511 | 3.050992  |
| O  | 2.103476  | 0.165910  | 3.547389  |
| O  | 0.804740  | 1.551722  | 2.397882  |
| C  | 1.578457  | 2.624164  | 2.920243  |
| H  | 1.494758  | 2.668696  | 4.014681  |
| H  | 1.172126  | 3.535584  | 2.473267  |
| H  | 2.636649  | 2.509989  | 2.645089  |
| C  | -0.024959 | -4.359702 | 2.741282  |
| H  | 0.868964  | -4.767448 | 2.253602  |
| H  | -0.912653 | -4.923394 | 2.434680  |
| H  | 0.103770  | -4.423572 | 3.830743  |
| C  | 3.536777  | 1.041995  | 0.145299  |
| H  | 2.724212  | 0.955091  | 0.876443  |
| C  | 3.359737  | 2.360207  | -0.583855 |
| C  | 4.402271  | 2.973361  | -1.290574 |
| C  | 2.100258  | 2.974782  | -0.592799 |
| C  | 4.189726  | 4.164925  | -1.986099 |
| H  | 5.395291  | 2.519168  | -1.299602 |
| C  | 1.879822  | 4.154155  | -1.300588 |
| H  | 1.268808  | 2.514624  | -0.051878 |
| C  | 2.927421  | 4.757182  | -1.997494 |
| H  | 5.017616  | 4.629808  | -2.526772 |
| H  | 0.876758  | 4.583195  | -1.315549 |
| H  | 2.759366  | 5.684473  | -2.549971 |
| C  | 4.858113  | 0.868261  | 0.941466  |
| H  | 4.890468  | 1.774249  | 1.610433  |
| H  | 5.698728  | 1.055143  | 0.215897  |
| O  | 4.932456  | -0.315292 | 1.564102  |
| C  | -0.448679 | 0.427885  | -1.487838 |
| H  | -0.289232 | -0.352610 | -2.241244 |
| H  | 0.263980  | 1.252683  | -1.633423 |
| C  | -1.834068 | 0.856875  | -1.363244 |
| C  | -2.877791 | 0.037673  | -1.670791 |
| H  | -3.895944 | 0.418275  | -1.549099 |
| C  | -2.713915 | -1.347171 | -2.215096 |
| H  | -2.253919 | -1.339508 | -3.219125 |
| H  | -2.036160 | -1.942397 | -1.576681 |
| H  | -3.673508 | -1.877453 | -2.285643 |
| C  | -2.025402 | -1.200881 | 1.218838  |
| H  | -1.858481 | -2.270752 | 1.122849  |
| C  | -3.256824 | -0.682446 | 0.993912  |
| H  | -3.410623 | 0.392054  | 1.122675  |
| C  | -4.460441 | -1.454324 | 0.654693  |
| C  | -5.684847 | -0.778954 | 0.518649  |
| C  | -4.446017 | -2.843081 | 0.437754  |
| C  | -6.850919 | -1.460681 | 0.178937  |
| H  | -5.710778 | 0.303280  | 0.671715  |
| C  | -5.610723 | -3.525607 | 0.099159  |
| H  | -3.510393 | -3.399170 | 0.523507  |
| C  | -6.819684 | -2.839470 | -0.032817 |
| H  | -7.790315 | -0.912676 | 0.075948  |
| H  | -5.574133 | -4.604777 | -0.067181 |
| H  | -7.732056 | -3.376959 | -0.300424 |
| B  | -2.181686 | 2.256833  | -0.778713 |
| O  | -3.346125 | 2.509204  | -0.093621 |
| O  | -1.391573 | 3.375930  | -0.869645 |
| C  | -3.462971 | 3.927898  | 0.093292  |
| C  | -1.969291 | 4.405512  | -0.045318 |
| C  | -1.805121 | 5.754931  | -0.729155 |
| H  | -2.181719 | 5.734183  | -1.759441 |
| H  | -2.344695 | 6.535391  | -0.172349 |
| H  | -0.742977 | 6.037324  | -0.758328 |
| C  | -1.204139 | 4.391750  | 1.275720  |
| H  | -1.284703 | 3.415021  | 1.775100  |
| H  | -0.141731 | 4.579074  | 1.063021  |

|   |           |           |           |
|---|-----------|-----------|-----------|
| H | -1.559744 | 5.172242  | 1.962771  |
| C | -4.092439 | 4.197454  | 1.451408  |
| H | -5.128996 | 3.830544  | 1.457912  |
| H | -3.547108 | 3.690103  | 2.257425  |
| H | -4.111051 | 5.277000  | 1.662596  |
| C | -4.368212 | 4.452850  | -1.021053 |
| H | -4.559280 | 5.529724  | -0.913671 |
| H | -3.927965 | 4.271452  | -2.012334 |
| H | -5.331065 | 3.924466  | -0.974366 |
| H | 0.397206  | -5.727974 | -0.482866 |
| H | -0.968417 | -3.787386 | -4.074025 |
| C | 0.828630  | -1.746848 | -4.118624 |
| H | -0.131621 | -1.524172 | -4.603497 |
| H | 1.228941  | -0.814017 | -3.700646 |
| H | 1.524158  | -2.085248 | -4.904011 |
| C | 2.463165  | -4.017744 | 0.086141  |
| H | 3.484660  | -3.933092 | -0.314037 |
| H | 2.351071  | -3.214977 | 0.827817  |
| H | 2.387124  | -4.981425 | 0.607048  |

108

Figure\_S5-1\_AA-9b(Na)-ts(1,6major) / electronic energy: -4131.83854441 a.u. / lowest freq: -314.01 cm-1

|    |           |           |           |
|----|-----------|-----------|-----------|
| C  | 4.409202  | -0.678859 | -1.598345 |
| H  | 5.207548  | -1.054404 | -0.941860 |
| C  | 3.706139  | -1.798193 | -2.378042 |
| H  | 3.596282  | -1.568039 | -3.449415 |
| C  | 2.223515  | -0.871689 | -0.812396 |
| C  | 1.434987  | -2.867925 | -1.971666 |
| C  | 1.347184  | -3.924553 | -1.046921 |
| C  | 0.621524  | -2.813495 | -3.113970 |
| C  | 0.355907  | -4.889661 | -1.235793 |
| C  | -0.350795 | -3.807478 | -3.275246 |
| C  | -0.497135 | -4.823552 | -2.336606 |
| H  | -1.271345 | -5.582115 | -2.471515 |
| Cu | 0.496181  | -0.459771 | 0.096214  |
| N  | 3.333055  | -0.149647 | -0.757910 |
| N  | 2.394188  | -1.846363 | -1.725962 |
| C  | -0.926695 | -0.354216 | 1.585449  |
| C  | 0.319930  | -0.747922 | 2.224491  |
| Na | 3.736675  | -1.410196 | 3.015045  |
| H  | 4.220373  | -2.766437 | -2.290448 |
| H  | 4.816547  | 0.103718  | -2.254261 |
| H  | -1.153101 | 0.711394  | 1.678048  |
| C  | 0.654958  | -2.121833 | 2.619202  |
| C  | 1.157029  | 0.309056  | 2.806858  |
| O  | -0.321657 | -3.003783 | 2.381993  |
| O  | 1.707722  | -2.496944 | 3.115524  |
| O  | 2.109282  | 0.160055  | 3.554073  |
| O  | 0.792913  | 1.550462  | 2.428543  |
| C  | 1.585552  | 2.615027  | 2.935263  |
| H  | 1.531681  | 2.656479  | 4.031831  |
| H  | 1.173512  | 3.531428  | 2.503325  |
| H  | 2.636148  | 2.498108  | 2.632803  |
| C  | -0.108171 | -4.346218 | 2.785163  |
| H  | 0.789218  | -4.765425 | 2.313326  |
| H  | -0.996803 | -4.901057 | 2.464708  |
| H  | 0.002286  | -4.412473 | 3.876704  |
| C  | 3.554110  | 0.965420  | 0.156830  |
| H  | 2.742115  | 0.886894  | 0.890514  |
| C  | 3.402118  | 2.292883  | -0.561064 |
| C  | 4.453546  | 2.886630  | -1.271342 |
| C  | 2.157175  | 2.936280  | -0.558273 |
| C  | 4.263440  | 4.086288  | -1.959333 |
| H  | 5.436350  | 2.411024  | -1.288785 |
| C  | 1.958755  | 4.123771  | -1.259006 |
| H  | 1.320349  | 2.493633  | -0.010863 |
| C  | 3.014766  | 4.706662  | -1.960045 |
| H  | 5.098247  | 4.535450  | -2.502571 |
| H  | 0.965982  | 4.575798  | -1.265411 |
| H  | 2.863814  | 5.640228  | -2.506772 |
| C  | 4.874971  | 0.758450  | 0.946498  |
| H  | 4.925505  | 1.656483  | 1.624995  |
| H  | 5.716095  | 0.938007  | 0.219524  |
| O  | 4.930325  | -0.433057 | 1.556033  |
| C  | -0.446441 | 0.476821  | -1.530405 |
| H  | -0.272218 | -0.355557 | -2.218822 |
| H  | 0.296764  | 1.278015  | -1.622207 |
| C  | -1.792693 | 0.871003  | -1.322151 |
| C  | -2.848236 | -0.018189 | -1.484198 |
| H  | -3.861083 | 0.390666  | -1.460661 |
| C  | -2.658429 | -1.367670 | -2.105762 |
| H  | -2.287646 | -1.280162 | -3.142345 |
| H  | -1.900389 | -1.953703 | -1.557194 |
| H  | -3.591840 | -1.945689 | -2.128204 |
| C  | -2.009583 | -1.159127 | 1.163043  |
| H  | -1.875852 | -2.237122 | 1.121905  |
| C  | -3.208743 | -0.599180 | 0.759351  |
| H  | -3.373906 | 0.460289  | 0.963227  |
| C  | -4.441509 | -1.376310 | 0.533011  |
| C  | -5.667315 | -0.694506 | 0.451684  |

|   |           |           |           |
|---|-----------|-----------|-----------|
| C | -4.454014 | -2.773184 | 0.382699  |
| C | -6.860582 | -1.377878 | 0.232453  |
| H | -5.673321 | 0.393835  | 0.558437  |
| C | -5.646781 | -3.457753 | 0.162519  |
| H | -3.519068 | -3.335233 | 0.426778  |
| C | -6.856599 | -2.765797 | 0.086217  |
| H | -7.800575 | -0.824145 | 0.174457  |
| H | -5.630839 | -4.544012 | 0.046024  |
| H | -7.790818 | -3.304488 | -0.086565 |
| B | -2.128721 | 2.290733  | -0.774518 |
| O | -3.293047 | 2.563854  | -0.101912 |
| O | -1.330156 | 3.398645  | -0.892786 |
| C | -3.397117 | 3.988156  | 0.060249  |
| C | -1.898486 | 4.448267  | -0.084685 |
| C | -1.720120 | 5.784224  | -0.790331 |
| H | -2.097458 | 5.750960  | -1.819982 |
| H | -2.250998 | 6.579176  | -0.245895 |
| H | -0.655135 | 6.054910  | -0.824320 |
| C | -1.135774 | 4.445992  | 1.237735  |
| H | -1.227012 | 3.476967  | 1.750165  |
| H | -0.070979 | 4.621263  | 1.026726  |
| H | -1.486740 | 5.238808  | 1.912808  |
| C | -4.025296 | 4.286900  | 1.412530  |
| H | -5.066480 | 3.933666  | 1.423106  |
| H | -3.487559 | 3.785641  | 2.227322  |
| H | -4.030070 | 5.369807  | 1.606196  |
| C | -4.295604 | 4.500327  | -1.065041 |
| H | -4.477524 | 5.580422  | -0.976214 |
| H | -3.855182 | 4.298549  | -2.052234 |
| H | -5.263025 | 3.981206  | -1.010802 |
| H | 0.262632  | -5.709887 | -0.519615 |
| H | -1.010160 | -3.771735 | -4.146018 |
| C | 0.800958  | -1.744126 | -4.158673 |
| H | -0.153909 | -1.505369 | -4.646711 |
| H | 1.213103  | -0.819367 | -3.733760 |
| H | 1.495772  | -2.086658 | -4.942798 |
| C | 2.334580  | -4.022077 | 0.084239  |
| H | 3.366807  | -3.937008 | -0.287161 |
| H | 2.203278  | -3.220744 | 0.824604  |
| H | 2.242445  | -4.986516 | 0.600994  |

108

Figure\_S5-1\_AA-9b(Na)-prod(1,6major) / electronic energy: -4131.89305721 a.u. / lowest freq: 14.34 cm-1

|    |           |           |           |
|----|-----------|-----------|-----------|
| C  | 4.164748  | -1.377524 | -0.543902 |
| H  | 4.765624  | -1.547913 | 0.357421  |
| C  | 3.465744  | -2.621183 | -1.090048 |
| H  | 3.905476  | -2.992066 | -2.026268 |
| C  | 1.883536  | -0.931945 | -0.720680 |
| C  | 1.191082  | -2.767922 | -2.193631 |
| C  | 0.438424  | -3.867209 | -1.754598 |
| C  | 1.108434  | -2.290243 | -3.514752 |
| C  | -0.430061 | -4.479860 | -2.664284 |
| C  | 0.215949  | -2.917077 | -4.388192 |
| C  | -0.547539 | -4.004162 | -3.966517 |
| H  | -1.239629 | -4.484668 | -4.661403 |
| Cu | 0.081514  | -0.100108 | -0.556349 |
| N  | 3.030727  | -0.511664 | -0.202549 |
| N  | 2.100743  | -2.126510 | -1.308257 |
| C  | -0.700145 | -0.142677 | 1.746611  |
| C  | 0.432926  | -0.379741 | 2.614873  |
| Na | 3.706184  | -0.667200 | 3.934341  |
| H  | 3.455734  | -3.448687 | -0.361690 |
| H  | 4.790981  | -0.890339 | -1.309914 |
| H  | -1.124043 | 0.864317  | 1.846324  |
| C  | 0.876419  | -1.693342 | 3.016038  |
| C  | 1.096609  | 0.758205  | 3.201470  |
| O  | 0.076226  | -2.698758 | 2.590948  |
| O  | 1.862908  | -1.973577 | 3.693199  |
| O  | 1.937602  | 0.762802  | 4.095287  |
| O  | 0.724682  | 1.947860  | 2.652792  |
| C  | 1.418854  | 3.087352  | 3.126865  |
| H  | 1.283935  | 3.219079  | 4.209577  |
| H  | 1.001757  | 3.947763  | 2.593568  |
| H  | 2.494798  | 3.004492  | 2.912082  |
| C  | 0.399875  | -4.001220 | 3.035382  |
| H  | 1.395772  | -4.309916 | 2.685275  |
| H  | -0.363352 | -4.665388 | 2.613027  |
| H  | 0.379228  | -4.064053 | 4.133069  |
| C  | 3.218623  | 0.819089  | 0.381528  |
| H  | 2.396377  | 0.954303  | 1.095369  |
| C  | 3.091427  | 1.875991  | -0.695682 |
| C  | 4.070406  | 2.037596  | -1.686887 |
| C  | 1.944838  | 2.675087  | -0.758687 |
| C  | 3.906019  | 2.971968  | -2.708372 |
| H  | 4.974687  | 1.425411  | -1.665629 |
| C  | 1.773849  | 3.607251  | -1.782656 |
| H  | 1.167084  | 2.556102  | 0.002445  |
| C  | 2.755312  | 3.759866  | -2.760467 |
| H  | 4.680433  | 3.082309  | -3.471265 |
| H  | 0.853142  | 4.189987  | -1.824439 |

|   |           |           |           |
|---|-----------|-----------|-----------|
| H | 2.622590  | 4.487886  | -3.564078 |
| C | 4.543196  | 0.884218  | 1.192332  |
| H | 4.567059  | 1.946526  | 1.565141  |
| H | 5.373240  | 0.863580  | 0.430304  |
| O | 4.650151  | -0.058861 | 2.136759  |
| C | -0.715831 | 0.625880  | -2.420159 |
| H | -0.598255 | -0.262280 | -3.047300 |
| H | -0.111834 | 1.498119  | -2.689349 |
| C | -1.720272 | 0.736635  | -1.492541 |
| C | -2.730295 | -0.373056 | -1.202476 |
| H | -3.724444 | 0.036035  | -1.457252 |
| C | -2.520778 | -1.644419 | -2.013099 |
| H | -2.567653 | -1.445090 | -3.093502 |
| H | -1.544808 | -2.107507 | -1.804456 |
| H | -3.296236 | -2.386447 | -1.777909 |
| C | -1.369194 | -0.973451 | 0.881372  |
| H | -1.033135 | -2.005519 | 0.778009  |
| C | -2.738887 | -0.616377 | 0.337055  |
| H | -3.015569 | 0.347716  | 0.782997  |
| C | -3.829423 | -1.592900 | 0.744684  |
| C | -5.139507 | -1.115274 | 0.885192  |
| C | -3.599479 | -2.958274 | 0.951329  |
| C | -6.188038 | -1.969978 | 1.219989  |
| H | -5.334678 | -0.049954 | 0.731001  |
| C | -4.645765 | -3.818340 | 1.287584  |
| H | -2.591144 | -3.364450 | 0.851609  |
| C | -5.944107 | -3.328690 | 1.423441  |
| H | -7.199451 | -1.571423 | 1.329424  |
| H | -4.442675 | -4.879981 | 1.446825  |
| H | -6.761413 | -4.002220 | 1.690813  |
| B | -2.043895 | 2.161145  | -0.908801 |
| O | -3.126900 | 2.406078  | -0.113258 |
| O | -1.346077 | 3.294723  | -1.207152 |
| C | -3.305475 | 3.834273  | -0.028764 |
| C | -1.868416 | 4.364447  | -0.389521 |
| C | -1.850153 | 5.655653  | -1.191658 |
| H | -2.355841 | 5.539685  | -2.158455 |
| H | -2.342658 | 6.463305  | -0.630221 |
| H | -0.811631 | 5.962060  | -1.382610 |
| C | -0.955244 | 4.477051  | 0.826738  |
| H | -0.931029 | 3.534126  | 1.392860  |
| H | 0.067568  | 4.695791  | 0.488173  |
| H | -1.273652 | 5.285981  | 1.498763  |
| C | -3.783889 | 4.186734  | 1.370170  |
| H | -4.787238 | 3.768003  | 1.532870  |
| H | -3.116064 | 3.780476  | 2.140042  |
| H | -3.844667 | 5.277854  | 1.494669  |
| C | -4.362214 | 4.211995  | -1.064673 |
| H | -4.594836 | 5.285254  | -1.025095 |
| H | -4.032308 | 3.962693  | -2.083696 |
| H | -5.283958 | 3.650446  | -0.856657 |
| H | -1.033025 | -5.330282 | -2.336880 |
| H | 0.126334  | -2.553146 | -5.414674 |
| C | 1.977388  | -1.147369 | -3.970893 |
| H | 1.806180  | -0.924162 | -5.032133 |
| H | 1.789076  | -0.231491 | -3.390987 |
| H | 3.044354  | -1.385831 | -3.840010 |
| C | 0.562452  | -4.357373 | -0.340231 |
| H | 1.489459  | -4.936015 | -0.198718 |
| H | 0.594227  | -3.517374 | 0.366705  |
| H | -0.279768 | -5.009538 | -0.072037 |

108

Figure\_S5-1\_AA-9d(Na)-prod(1,6minor) / electronic energy: -4131.89461386 a.u. / lowest freq: 15.14 cm-1

|    |           |           |           |
|----|-----------|-----------|-----------|
| C  | 1.527565  | 3.959244  | 1.128272  |
| H  | 2.402038  | 4.398648  | 0.630256  |
| C  | 0.183036  | 4.296853  | 0.481273  |
| H  | -0.445321 | 4.917142  | 1.133522  |
| C  | 0.460338  | 1.969951  | 0.523869  |
| C  | -1.602611 | 2.835008  | -0.490365 |
| C  | -2.638710 | 3.755604  | -0.310066 |
| C  | -1.722008 | 1.846550  | -1.471418 |
| C  | -3.785425 | 3.703744  | -1.107678 |
| C  | -2.850087 | 1.788961  | -2.291760 |
| C  | -3.874204 | 2.722207  | -2.099620 |
| H  | -4.761234 | 2.684591  | -2.738902 |
| Cu | 0.217120  | 0.006197  | 0.452826  |
| N  | 1.585501  | 2.501684  | 0.980010  |
| N  | -0.412104 | 2.968201  | 0.260010  |
| C  | 1.159167  | -0.868446 | -1.511022 |
| C  | 2.347865  | -0.119169 | -1.889128 |
| Na | 4.774227  | 2.446377  | -1.738403 |
| H  | 0.290446  | 4.813584  | -0.486170 |
| H  | 1.548789  | 4.232726  | 2.194926  |
| H  | 0.310289  | -0.732629 | -2.191893 |
| C  | 2.177155  | 1.052204  | -2.713897 |
| C  | 3.685286  | -0.469530 | -1.484919 |
| O  | 0.895500  | 1.240322  | -3.113881 |
| O  | 3.029016  | 1.866019  | -3.064576 |
| O  | 4.720843  | 0.158750  | -1.697077 |



|   |           |           |           |
|---|-----------|-----------|-----------|
| O | 3.770611  | -1.642108 | -0.805522 |
| C | 5.062185  | -2.059780 | -0.408811 |
| H | 5.718481  | -2.212996 | -1.277601 |
| H | 4.922718  | -3.008448 | 0.123031  |
| H | 5.533027  | -1.322804 | 0.258688  |
| C | 0.625352  | 2.411302  | -3.857115 |
| H | 0.906778  | 3.312795  | -3.293302 |
| H | -0.455620 | 2.416284  | -4.037653 |
| H | 1.165305  | 2.411682  | -4.815022 |
| C | 2.775794  | 1.710476  | 1.288780  |
| H | 2.924825  | 1.029866  | 0.437491  |
| C | 2.619234  | 0.882484  | 2.539475  |
| C | 2.012578  | 1.389961  | 3.694165  |
| C | 3.149610  | -0.412598 | 2.577296  |
| C | 1.933908  | 0.620275  | 4.854074  |
| H | 1.578612  | 2.392484  | 3.682589  |
| C | 3.077963  | -1.184107 | 3.736444  |
| H | 3.605977  | -0.824903 | 1.674110  |
| C | 2.466527  | -0.669747 | 4.880356  |
| H | 1.450778  | 1.029682  | 5.744135  |
| H | 3.492840  | -2.194568 | 3.743179  |
| H | 2.401774  | -1.272607 | 5.788692  |
| C | 4.048620  | 2.614416  | 1.335450  |
| H | 4.855619  | 1.903288  | 1.662171  |
| H | 3.905325  | 3.277127  | 2.238366  |
| O | 4.289887  | 3.266534  | 0.191655  |
| C | -0.475841 | -0.725742 | 2.474875  |
| H | -0.969078 | 0.166253  | 2.870384  |
| H | 0.485444  | -0.988300 | 2.926647  |
| C | -1.121877 | -1.534474 | 1.592333  |
| C | -0.601912 | -2.879408 | 1.107298  |
| H | -1.463960 | -3.565249 | 1.128593  |
| C | 0.490312  | -3.485742 | 1.984120  |
| H | 1.386662  | -2.851840 | 2.044440  |
| H | 0.121647  | -3.629721 | 3.010537  |
| H | 0.798501  | -4.465606 | 1.591055  |
| C | 0.973841  | -1.764138 | -0.485689 |
| H | 1.834180  | -1.992672 | 0.145251  |
| C | -0.182946 | -2.731221 | -0.386490 |
| H | -1.052299 | -2.306335 | -0.919665 |
| C | 0.098673  | -4.084035 | -1.026438 |
| C | -0.956123 | -4.990472 | -1.202245 |
| C | 1.380163  | -4.465050 | -1.437498 |
| C | -0.737115 | -6.246529 | -1.762926 |
| H | -1.967075 | -4.701085 | -0.899335 |
| C | 1.602896  | -5.724287 | -1.998576 |
| H | 2.211669  | -3.764611 | -1.329868 |
| C | 0.548160  | -6.620334 | -2.161166 |
| H | -1.573436 | -6.937289 | -1.894007 |
| H | 2.611226  | -6.002955 | -2.314219 |
| H | 0.722877  | -7.603744 | -2.603368 |
| C | -2.919750 | 0.783887  | -3.412885 |
| H | -2.352821 | -0.127471 | -3.175169 |
| H | -3.958006 | 0.499075  | -3.634338 |
| H | -2.491679 | 1.204636  | -4.337334 |
| C | -4.923425 | 4.661111  | -0.870139 |
| H | -5.463520 | 4.882128  | -1.801569 |
| H | -5.649371 | 4.227028  | -0.162992 |
| H | -4.570817 | 5.608717  | -0.439306 |
| H | -2.559267 | 4.523296  | 0.462028  |
| H | -0.889866 | 1.165570  | -1.646998 |
| B | -2.607564 | -1.171924 | 1.232826  |
| O | -3.462573 | -2.079566 | 0.681338  |
| O | -3.205489 | 0.012274  | 1.545801  |
| C | -4.723743 | -1.411776 | 0.455280  |
| C | -4.632143 | -0.188556 | 1.442648  |
| C | -5.278005 | 1.088423  | 0.933969  |
| H | -4.808714 | 1.434966  | 0.005803  |
| H | -6.351992 | 0.930159  | 0.755483  |
| H | -5.169587 | 1.882824  | 1.686449  |
| C | -5.135773 | -0.516484 | 2.847224  |
| H | -4.684067 | -1.442546 | 3.232308  |
| H | -4.861541 | 0.303788  | 3.525533  |
| H | -6.228919 | -0.628463 | 2.862924  |
| C | -5.855743 | -2.383813 | 0.745316  |
| H | -5.850387 | -3.191021 | -0.000852 |
| H | -5.757145 | -2.837443 | 1.739521  |
| H | -6.826923 | -1.870812 | 0.685871  |
| C | -4.739060 | -0.989983 | -1.009226 |
| H | -5.692664 | -0.518619 | -1.285269 |
| H | -3.929450 | -0.278221 | -1.212942 |
| H | -4.590735 | -1.876066 | -1.642537 |

108

Figure\_S5-1\_AA-9d(Na)-ts(1,6minor) / electronic energy: -4131.83826859 a.u. / lowest freq: -396.29 cm-1

|   |          |           |          |
|---|----------|-----------|----------|
| C | 4.469926 | -0.443997 | 1.672550 |
| H | 5.247146 | -1.041689 | 1.180404 |
| C | 4.499512 | 1.026998  | 1.249706 |
| H | 4.746261 | 1.708953  | 2.075439 |
| C | 2.421749 | 0.104477  | 0.696218 |

|    |           |           |           |
|----|-----------|-----------|-----------|
| C  | 2.694159  | 2.516174  | 0.328613  |
| C  | 3.622554  | 3.539170  | 0.105580  |
| C  | 1.335007  | 2.773658  | 0.113683  |
| C  | 3.206557  | 4.798635  | -0.343625 |
| C  | 0.906044  | 4.009041  | -0.365093 |
| C  | 1.849125  | 5.019335  | -0.583949 |
| H  | 1.518011  | 5.994382  | -0.952441 |
| Cu | 0.651461  | -0.233012 | -0.145874 |
| N  | 3.153417  | -0.876718 | 1.197255  |
| N  | 3.129732  | 1.255260  | 0.775787  |
| C  | -0.449819 | -0.377166 | -1.908705 |
| C  | 0.950711  | -0.574103 | -2.219945 |
| Na | 4.395784  | -1.267744 | -1.911966 |
| H  | 5.218917  | 1.203147  | 0.434085  |
| H  | 4.556865  | -0.574590 | 2.761710  |
| H  | -0.771980 | 0.671056  | -1.906903 |
| C  | 1.796754  | 0.554814  | -2.631366 |
| C  | 1.557204  | -1.901068 | -2.399781 |
| O  | 1.102828  | 1.647176  | -2.967186 |
| O  | 3.019774  | 0.554075  | -2.655052 |
| O  | 2.551044  | -2.139089 | -3.064543 |
| O  | 0.935241  | -2.881995 | -1.730970 |
| C  | 1.568065  | -4.158285 | -1.755685 |
| H  | 1.565912  | -4.575960 | -2.772163 |
| H  | 0.975953  | -4.795886 | -1.089555 |
| H  | 2.604387  | -4.059483 | -1.397996 |
| C  | 1.854176  | 2.797963  | -3.322961 |
| H  | 2.591949  | 3.042654  | -2.547584 |
| H  | 1.131407  | 3.614819  | -3.423296 |
| H  | 2.372569  | 2.636210  | -4.279059 |
| C  | 2.729288  | -2.269726 | 1.190057  |
| H  | 2.000328  | -2.350750 | 0.369887  |
| C  | 2.030512  | -2.693264 | 2.462173  |
| C  | 1.303811  | -3.891954 | 2.458310  |
| C  | 2.047587  | -1.933595 | 3.636297  |
| C  | 0.623887  | -4.324069 | 3.594496  |
| H  | 1.253762  | -4.484814 | 1.541294  |
| C  | 1.367489  | -2.362807 | 4.776761  |
| H  | 2.573226  | -0.977399 | 3.661215  |
| C  | 0.654963  | -3.560385 | 4.762348  |
| H  | 0.058466  | -5.258332 | 3.564838  |
| H  | 1.389462  | -1.749953 | 5.680903  |
| H  | 0.118708  | -3.893730 | 5.653464  |
| C  | 3.933789  | -3.167413 | 0.769042  |
| H  | 3.517506  | -4.210119 | 0.766053  |
| H  | 4.635625  | -3.170081 | 1.651187  |
| O  | 4.476100  | -2.768885 | -0.387895 |
| C  | -0.617585 | -0.227119 | 1.499638  |
| H  | -0.259743 | 0.665067  | 2.027138  |
| H  | -0.161570 | -1.154496 | 1.875175  |
| C  | -1.998087 | -0.258720 | 1.179527  |
| C  | -2.643875 | -1.418897 | 0.748472  |
| H  | -3.735269 | -1.406444 | 0.754760  |
| C  | -1.975880 | -2.758440 | 0.801979  |
| H  | -0.987700 | -2.727335 | 0.312538  |
| H  | -1.801482 | -3.073755 | 1.845746  |
| H  | -2.581871 | -3.532649 | 0.308588  |
| C  | -1.483318 | -1.333013 | -1.904628 |
| H  | -1.228083 | -2.367889 | -2.130937 |
| C  | -2.769548 | -1.031796 | -1.482698 |
| H  | -3.013770 | 0.022045  | -1.329599 |
| C  | -3.949462 | -1.881475 | -1.751590 |
| C  | -5.230206 | -1.355439 | -1.509259 |
| C  | -3.856110 | -3.195219 | -2.237390 |
| C  | -6.375288 | -2.109163 | -1.751358 |
| H  | -5.312610 | -0.345042 | -1.099853 |
| C  | -5.002510 | -3.951400 | -2.476432 |
| H  | -2.878385 | -3.637161 | -2.438538 |
| C  | -6.267312 | -3.412922 | -2.238427 |
| H  | -7.359429 | -1.676133 | -1.557402 |
| H  | -4.905044 | -4.970339 | -2.858533 |
| H  | -7.164255 | -4.005613 | -2.431296 |
| C  | -0.550857 | 4.210838  | -0.677788 |
| H  | -1.177033 | 3.580697  | -0.030806 |
| H  | -0.854242 | 5.259895  | -0.551482 |
| H  | -0.760119 | 3.927434  | -1.722701 |
| C  | 4.218891  | 5.896659  | -0.543801 |
| H  | 3.849068  | 6.661840  | -1.240298 |
| H  | 4.442114  | 6.397217  | 0.412094  |
| H  | 5.166978  | 5.501689  | -0.936412 |
| H  | 4.686341  | 3.368745  | 0.274961  |
| H  | 0.589000  | 2.008960  | 0.331241  |
| B  | -2.867154 | 1.034726  | 1.243105  |
| O  | -4.168686 | 1.066803  | 0.807004  |
| O  | -2.470203 | 2.243035  | 1.761486  |
| C  | -4.632911 | 2.425335  | 0.884714  |
| C  | -3.662798 | 3.033453  | 1.958791  |
| C  | -3.349024 | 4.508225  | 1.772070  |
| H  | -2.917498 | 4.718525  | 0.787415  |

|   |           |          |           |
|---|-----------|----------|-----------|
| H | -4.266143 | 5.105093 | 1.885539  |
| H | -2.630433 | 4.835287 | 2.537093  |
| C | -4.129722 | 2.778140 | 3.392489  |
| H | -4.379700 | 1.718700 | 3.550281  |
| H | -3.317260 | 3.042675 | 4.083975  |
| H | -5.009866 | 3.386284 | 3.644266  |
| C | -6.101976 | 2.428584 | 1.276122  |
| H | -6.702526 | 1.988364 | 0.467061  |
| H | -6.278214 | 1.844425 | 2.188036  |
| H | -6.455168 | 3.457239 | 1.442197  |
| C | -4.450664 | 3.041417 | -0.502266 |
| H | -4.848405 | 4.065103 | -0.546035 |
| H | -3.389948 | 3.064525 | -0.792358 |
| H | -4.992125 | 2.429854 | -1.238270 |

108

Figure\_S5-1\_AA-9d(Na)-pc(1,6minor) / electronic energy: -4131.84483185 a.u. / lowest freq: -3.52 cm-1

|    |           |           |           |
|----|-----------|-----------|-----------|
| C  | 4.461293  | -0.848137 | 1.538673  |
| H  | 5.155156  | -1.475896 | 0.965822  |
| C  | 4.620877  | 0.641259  | 1.222724  |
| H  | 4.903144  | 1.242189  | 2.099305  |
| C  | 2.459543  | -0.049804 | 0.638933  |
| C  | 2.964918  | 2.347645  | 0.415199  |
| C  | 3.983563  | 3.287367  | 0.226634  |
| C  | 1.631137  | 2.756810  | 0.295017  |
| C  | 3.680683  | 4.618154  | -0.090949 |
| C  | 1.311070  | 4.069192  | -0.041105 |
| C  | 2.344108  | 4.995932  | -0.226834 |
| H  | 2.100443  | 6.031941  | -0.478494 |
| Cu | 0.617532  | -0.171293 | -0.124209 |
| N  | 3.092223  | -1.117929 | 1.095045  |
| N  | 3.284205  | 1.018244  | 0.749042  |
| C  | -0.521406 | -0.159234 | -1.804631 |
| C  | 0.845351  | -0.414703 | -2.164728 |
| Na | 4.237793  | -1.401879 | -2.173051 |
| H  | 5.370360  | 0.813916  | 0.434864  |
| H  | 4.578740  | -1.072907 | 2.609278  |
| H  | -0.810692 | 0.897383  | -1.820307 |
| C  | 1.758191  | 0.680073  | -2.561708 |
| C  | 1.342449  | -1.774038 | -2.492192 |
| O  | 1.134759  | 1.832561  | -2.795642 |
| O  | 2.970591  | 0.578530  | -2.654591 |
| O  | 2.220045  | -2.013961 | -3.298411 |
| O  | 0.740062  | -2.745564 | -1.808463 |
| C  | 1.243925  | -4.067164 | -2.002437 |
| H  | 1.084154  | -4.391561 | -3.039981 |
| H  | 0.673163  | -4.702996 | -1.317033 |
| H  | 2.317847  | -4.075526 | -1.760490 |
| C  | 1.951982  | 2.946679  | -3.131024 |
| H  | 2.731359  | 3.101426  | -2.373219 |
| H  | 1.284164  | 3.813709  | -3.165782 |
| H  | 2.422474  | 2.792422  | -4.112390 |
| C  | 2.547092  | -2.465134 | 1.039809  |
| H  | 1.732241  | -2.423635 | 0.302040  |
| C  | 1.952589  | -2.923918 | 2.354758  |
| C  | 1.980956  | -2.143857 | 3.515629  |
| C  | 1.297424  | -4.162674 | 2.407203  |
| C  | 1.384726  | -2.590068 | 4.695919  |
| H  | 2.449250  | -1.158088 | 3.498307  |
| C  | 0.701371  | -4.611603 | 3.583302  |
| H  | 1.232501  | -4.776341 | 1.505467  |
| C  | 0.744204  | -3.826749 | 4.736640  |
| H  | 1.414378  | -1.958730 | 5.587046  |
| H  | 0.190152  | -5.576913 | 3.596330  |
| H  | 0.272585  | -4.174654 | 5.658221  |
| C  | 3.624082  | -3.418911 | 0.433500  |
| H  | 3.120093  | -4.418353 | 0.371639  |
| H  | 4.395257  | -3.565461 | 1.241174  |
| O  | 4.103805  | -2.961572 | -0.731255 |
| C  | -0.561739 | -0.037531 | 1.507573  |
| H  | -0.257776 | 0.910981  | 1.975829  |
| H  | -0.111088 | -0.873333 | 2.068443  |
| C  | -2.015237 | -0.157795 | 1.354703  |
| C  | -2.622090 | -1.361552 | 1.179660  |
| H  | -3.708902 | -1.395615 | 1.065769  |
| C  | -1.870570 | -2.652362 | 1.107164  |
| H  | -1.059309 | -2.575428 | 0.357734  |
| H  | -1.371362 | -2.898945 | 2.061539  |
| H  | -2.519233 | -3.496200 | 0.831971  |
| C  | -1.620225 | -1.097291 | -1.926325 |
| H  | -1.373555 | -2.130106 | -2.172676 |
| C  | -2.905785 | -0.763488 | -1.689820 |
| H  | -3.139123 | 0.260737  | -1.386787 |
| C  | -4.064653 | -1.661253 | -1.813800 |
| C  | -5.292821 | -1.267875 | -1.255667 |
| C  | -3.999865 | -2.904885 | -2.464432 |
| C  | -6.414005 | -2.090010 | -1.336018 |
| H  | -5.343142 | -0.318852 | -0.716739 |
| C  | -5.121163 | -3.727141 | -2.544120 |
| H  | -3.065759 | -3.231894 | -2.926140 |

|   |           |           |           |
|---|-----------|-----------|-----------|
| C | -6.333710 | -3.324684 | -1.981214 |
| H | -7.355624 | -1.766732 | -0.886156 |
| H | -5.048806 | -4.689813 | -3.055512 |
| H | -7.211550 | -3.971450 | -2.046053 |
| C | -0.131639 | 4.450427  | -0.226850 |
| H | -0.787884 | 3.817848  | 0.386362  |
| H | -0.312636 | 5.503877  | 0.030294  |
| H | -0.431491 | 4.311235  | -1.279053 |
| C | 4.795154  | 5.616417  | -0.270547 |
| H | 4.417539  | 6.575401  | -0.650660 |
| H | 5.305857  | 5.808813  | 0.686024  |
| H | 5.553704  | 5.243378  | -0.975012 |
| H | 5.030786  | 2.998023  | 0.326050  |
| H | 0.823543  | 2.049698  | 0.482911  |
| B | -2.920015 | 1.106743  | 1.309435  |
| O | -4.262975 | 1.069952  | 1.005916  |
| O | -2.496973 | 2.394962  | 1.552749  |
| C | -4.724119 | 2.419588  | 0.844901  |
| C | -3.669939 | 3.222133  | 1.684717  |
| C | -3.387108 | 4.623172  | 1.167040  |
| H | -3.013914 | 4.613980  | 0.135927  |
| H | -4.305108 | 5.229031  | 1.200334  |
| H | -2.632262 | 5.111930  | 1.799544  |
| C | -4.012188 | 3.276552  | 3.173973  |
| H | -4.248614 | 2.277319  | 3.567893  |
| H | -3.141849 | 3.662179  | 3.723683  |
| H | -4.866179 | 3.940833  | 3.367623  |
| C | -6.155306 | 2.522239  | 1.348122  |
| H | -6.820577 | 1.938255  | 0.695564  |
| H | -6.252173 | 2.130962  | 2.368748  |
| H | -6.497123 | 3.567963  | 1.336079  |
| C | -4.661753 | 2.748334  | -0.647540 |
| H | -5.067941 | 3.747746  | -0.857869 |
| H | -3.628222 | 2.705387  | -1.023098 |
| H | -5.258795 | 2.013185  | -1.206049 |

76

Figure\_S5-1\_9d(Na)-Cu-allyl / electronic energy: -3289.87323919 a.u. / lowest freq: 20.48 cm-1

|    |           |           |           |
|----|-----------|-----------|-----------|
| C  | 2.890494  | 1.919481  | -1.277302 |
| H  | 3.212834  | 1.619009  | -2.282905 |
| C  | 1.580347  | 2.708660  | -1.287786 |
| H  | 1.715166  | 3.773396  | -1.053559 |
| C  | 1.361334  | 0.845889  | 0.116302  |
| C  | -0.476920 | 2.468998  | 0.143962  |
| C  | -1.201053 | 3.344915  | -0.672658 |
| C  | -1.049124 | 2.021662  | 1.341390  |
| C  | -2.500751 | 3.731098  | -0.327753 |
| C  | -2.353152 | 2.373080  | 1.688914  |
| C  | -3.068439 | 3.232389  | 0.847613  |
| H  | -4.088296 | 3.522016  | 1.116164  |
| Cu | 0.549243  | -0.521771 | 1.237838  |
| N  | 2.543033  | 0.749000  | -0.472014 |
| N  | 0.804179  | 2.032970  | -0.243867 |
| H  | 1.066715  | 2.629079  | -2.259433 |
| H  | 3.717911  | 2.468759  | -0.801157 |
| C  | 3.344698  | -0.463934 | -0.515154 |
| H  | 2.901187  | -1.123898 | 0.249271  |
| C  | 4.775968  | -0.154327 | -0.107352 |
| C  | 5.877692  | -0.460143 | -0.912213 |
| C  | 5.005969  | 0.459152  | 1.132365  |
| C  | 7.175180  | -0.164497 | -0.487241 |
| H  | 5.732823  | -0.936167 | -1.883022 |
| C  | 6.297285  | 0.758235  | 1.558327  |
| H  | 4.151927  | 0.706681  | 1.769782  |
| C  | 7.389916  | 0.445116  | 0.746743  |
| H  | 8.022928  | -0.413557 | -1.129804 |
| H  | 6.453595  | 1.234919  | 2.528793  |
| H  | 8.405182  | 0.675575  | 1.077400  |
| C  | 3.137215  | -1.190296 | -1.873781 |
| H  | 3.774689  | -2.111853 | -1.794461 |
| H  | 3.662176  | -0.569468 | -2.653477 |
| O  | 1.845948  | -1.423998 | -2.140698 |
| C  | -0.451569 | -1.910882 | 2.208955  |
| H  | -1.214664 | -1.404047 | 2.822373  |
| H  | 0.177713  | -2.546649 | 2.852851  |
| C  | -1.044927 | -2.620703 | 1.056533  |
| C  | -0.492142 | -3.711033 | 0.455359  |
| H  | -0.988980 | -4.153163 | -0.417369 |
| C  | 0.787250  | -4.340968 | 0.920790  |
| H  | 1.118695  | -5.149002 | 0.253404  |
| H  | 1.593059  | -3.583472 | 0.969365  |
| H  | 0.701537  | -4.758930 | 1.940091  |
| B  | -2.306527 | -1.993764 | 0.382957  |
| O  | -3.373025 | -1.412180 | 1.004517  |
| O  | -2.415671 | -1.921873 | -0.995612 |
| C  | -4.386992 | -1.159047 | 0.008097  |
| C  | -3.540932 | -1.073394 | -1.313835 |
| C  | -5.133677 | 0.116193  | 0.360060  |
| C  | -5.338535 | -2.354768 | 0.029500  |
| C  | -4.233816 | -1.613380 | -2.553791 |

|    |           |           |           |
|----|-----------|-----------|-----------|
| C  | -2.982138 | 0.323768  | -1.572158 |
| H  | -4.479589 | -2.677383 | -2.447888 |
| H  | -3.576969 | -1.498793 | -3.428337 |
| H  | -5.161058 | -1.055202 | -2.750289 |
| H  | -4.818196 | -3.287688 | -0.232540 |
| H  | -6.175828 | -2.213317 | -0.667972 |
| H  | -5.748118 | -2.466329 | 1.043327  |
| H  | -2.476565 | 0.722952  | -0.681484 |
| H  | -3.773968 | 1.028313  | -1.862331 |
| H  | -2.252056 | 0.281035  | -2.394600 |
| H  | -4.449481 | 0.965059  | 0.476018  |
| H  | -5.678059 | -0.021758 | 1.305057  |
| H  | -5.865158 | 0.358733  | -0.425131 |
| Na | -0.132379 | -1.871828 | -1.732083 |
| C  | -3.288355 | 4.628767  | -1.246136 |
| H  | -4.131202 | 5.101149  | -0.723105 |
| H  | -2.656663 | 5.421816  | -1.671818 |
| H  | -3.701543 | 4.052122  | -2.089506 |
| C  | -2.973914 | 1.790798  | 2.930585  |
| H  | -2.277050 | 1.825374  | 3.780685  |
| H  | -3.894667 | 2.320460  | 3.211548  |
| H  | -3.228022 | 0.732756  | 2.756237  |
| H  | -0.769050 | 3.721967  | -1.600967 |
| H  | -0.472166 | 1.385437  | 2.015110  |

76

Figure\_S5-1\_9b(Na)-Cu-allyl / electronic energy: -3289.86902565 a.u. / lowest freq: 17.54 cm-1

|    |           |           |           |
|----|-----------|-----------|-----------|
| C  | -2.892697 | 1.596089  | 1.460941  |
| H  | -2.743197 | 1.250407  | 2.497136  |
| C  | -1.975473 | 2.766074  | 1.108473  |
| H  | -2.463374 | 3.496160  | 0.440338  |
| C  | -1.249374 | 0.839069  | 0.001489  |
| C  | 0.301145  | 2.736026  | -0.016190 |
| C  | 1.264409  | 3.038492  | 0.964267  |
| C  | 0.499150  | 3.065316  | -1.370203 |
| C  | 2.449274  | 3.661177  | 0.561084  |
| C  | 1.705816  | 3.672713  | -1.732198 |
| C  | 2.674483  | 3.968356  | -0.777657 |
| H  | 3.610370  | 4.443824  | -1.078925 |
| Cu | -0.251244 | -0.335231 | -1.174432 |
| N  | -2.441060 | 0.564339  | 0.526560  |
| N  | -0.895934 | 2.082234  | 0.388527  |
| H  | -1.606803 | 3.302977  | 1.991271  |
| H  | -3.958000 | 1.822171  | 1.319187  |
| C  | -3.044007 | -0.760576 | 0.519412  |
| H  | -2.554189 | -1.289301 | -0.315468 |
| C  | -4.525217 | -0.639770 | 0.199869  |
| C  | -5.531197 | -1.041691 | 1.083724  |
| C  | -4.902867 | -0.081480 | -1.029569 |
| C  | -6.878729 | -0.890279 | 0.747507  |
| H  | -5.271410 | -1.477151 | 2.049741  |
| C  | -6.244395 | 0.073098  | -1.368072 |
| H  | -4.124350 | 0.241321  | -1.727003 |
| C  | -7.240224 | -0.331892 | -0.476378 |
| H  | -7.649523 | -1.209649 | 1.452726  |
| H  | -6.515806 | 0.510614  | -2.331627 |
| H  | -8.294305 | -0.210547 | -0.735919 |
| C  | -2.663657 | -1.551289 | 1.799213  |
| H  | -3.213957 | -2.525298 | 1.696342  |
| H  | -3.180113 | -1.041428 | 2.659897  |
| O  | -1.336986 | -1.673655 | 1.957204  |
| C  | 0.761487  | -1.541323 | -2.354457 |
| H  | 1.475351  | -0.912042 | -2.911363 |
| H  | 0.108200  | -2.075043 | -3.064880 |
| C  | 1.441426  | -2.424103 | -1.385089 |
| C  | 0.988711  | -3.644270 | -0.986354 |
| H  | 1.556486  | -4.204231 | -0.232322 |
| C  | -0.265528 | -4.273060 | -1.519961 |
| H  | -0.471331 | -5.246949 | -1.053546 |
| H  | -1.139388 | -3.618105 | -1.339556 |
| H  | -0.221274 | -4.425144 | -2.613314 |
| B  | 2.674857  | -1.814147 | -0.650999 |
| O  | 3.578781  | -0.949566 | -1.188422 |
| O  | 2.893022  | -2.014555 | 0.702220  |
| C  | 4.592362  | -0.671470 | -0.204792 |
| C  | 3.868051  | -1.044195 | 1.142553  |
| C  | 4.996463  | 0.790230  | -0.319960 |
| C  | 5.781401  | -1.578686 | -0.516488 |
| C  | 4.764620  | -1.674238 | 2.195354  |
| C  | 3.081412  | 0.121336  | 1.736282  |
| H  | 5.219611  | -2.605750 | 1.836445  |
| H  | 4.178808  | -1.903760 | 3.097250  |
| H  | 5.566555  | -0.977538 | 2.480470  |
| H  | 5.509876  | -2.641027 | -0.432057 |
| H  | 6.626269  | -1.378286 | 0.157165  |
| H  | 6.109124  | -1.392230 | -1.548824 |
| H  | 2.392039  | 0.553077  | 0.995092  |
| H  | 3.746843  | 0.918937  | 2.094387  |
| H  | 2.489884  | -0.230057 | 2.595248  |
| H  | 4.125398  | 1.455965  | -0.267177 |

|    |           |           |           |
|----|-----------|-----------|-----------|
| H  | 5.494789  | 0.958336  | -1.285293 |
| H  | 5.701406  | 1.061643  | 0.480029  |
| Na | 0.603802  | -2.265300 | 1.509716  |
| H  | 1.879983  | 3.924594  | -2.781112 |
| H  | 3.211577  | 3.891914  | 1.309483  |
| C  | -0.547128 | 2.775810  | -2.413076 |
| H  | -0.507148 | 1.718738  | -2.725077 |
| H  | -1.561952 | 2.956715  | -2.031076 |
| H  | -0.390961 | 3.397087  | -3.304993 |
| C  | 1.037472  | 2.696278  | 2.412516  |
| H  | 0.431839  | 3.466996  | 2.916158  |
| H  | 0.508160  | 1.738685  | 2.519469  |
| H  | 1.991775  | 2.629837  | 2.951304  |

108

Figure\_S5-1\_AA-9b(Na)-pc(1,6minor) / electronic energy: -4131.83917004 a.u. / lowest freq: 12.63 cm-1

|    |           |           |           |
|----|-----------|-----------|-----------|
| C  | -1.744589 | 2.568290  | -2.024714 |
| H  | -3.616915 | 1.410138  | -1.669354 |
| C  | -2.526686 | 1.328656  | -1.713314 |
| H  | -2.375547 | 3.468081  | -2.009502 |
| H  | -7.009362 | 3.589678  | 0.160410  |
| H  | -5.475048 | 1.687490  | 0.591559  |
| C  | -5.946837 | 3.776867  | 0.331773  |
| C  | -5.086953 | 2.709525  | 0.579410  |
| H  | -6.122965 | 5.920004  | 0.101560  |
| C  | -5.451977 | 5.080953  | 0.298385  |
| C  | -3.715009 | 2.916881  | 0.800438  |
| C  | -4.090525 | 5.303744  | 0.515089  |
| C  | -2.853905 | 1.750731  | 1.041101  |
| H  | -3.360402 | 0.782929  | 1.000514  |
| C  | -3.232051 | 4.236312  | 0.762602  |
| H  | -3.691943 | 6.320567  | 0.486526  |
| H  | -2.169592 | 4.433144  | 0.918377  |
| C  | -1.537243 | 1.785444  | 1.354389  |
| H  | -1.010660 | 2.735383  | 1.411591  |
| C  | -1.947815 | 0.115944  | -1.507552 |
| H  | -1.404906 | -0.323137 | 1.643927  |
| C  | -0.782977 | 0.574537  | 1.581561  |
| H  | 0.069863  | 0.593115  | -2.169673 |
| C  | -0.508451 | -0.099169 | -1.537898 |
| H  | -0.253765 | -1.141127 | -1.759216 |
| Cu | 0.555630  | -0.007680 | 0.176082  |
| C  | 2.320411  | -0.588887 | -0.575361 |
| N  | 2.713780  | -1.786548 | -1.048589 |
| H  | 1.717240  | 2.580046  | -4.848949 |
| N  | 3.257573  | 0.302445  | -0.872224 |
| C  | 1.341169  | 1.589176  | 2.623630  |
| O  | 1.060659  | 2.710782  | 1.950983  |
| C  | 0.503158  | 0.439358  | 2.230271  |
| O  | 1.958756  | -1.148851 | 3.297740  |
| C  | 0.862383  | -0.849624 | 2.850964  |
| C  | 3.216116  | 1.695196  | -0.472701 |
| C  | 4.450799  | -0.290522 | -1.481450 |
| H  | 5.268927  | -0.247924 | -0.747530 |
| C  | 3.986397  | -1.718662 | -1.777503 |
| H  | 3.819411  | -1.897458 | -2.852046 |
| C  | 1.961401  | -2.995186 | -0.985754 |
| C  | 2.113800  | -3.816227 | 0.146978  |
| C  | 1.148924  | -3.371882 | -2.067504 |
| C  | 1.366682  | -4.994156 | 0.217225  |
| C  | 0.413182  | -4.557322 | -1.955584 |
| C  | 0.510252  | -5.355271 | -0.821912 |
| H  | -0.071454 | -6.277270 | -0.751492 |
| Na | 3.951537  | 0.112907  | 2.829841  |
| H  | 4.688269  | -2.482346 | -1.413202 |
| H  | 4.750846  | 0.258825  | -2.384953 |
| O  | -0.151134 | -1.720640 | 2.868010  |
| O  | 2.217455  | 1.577656  | 3.468723  |
| C  | 1.811151  | 3.868469  | 2.290935  |
| H  | 1.670691  | 4.127614  | 3.349036  |
| H  | 1.429495  | 4.671186  | 1.650968  |
| H  | 2.880915  | 3.702248  | 2.100541  |
| C  | 0.097051  | -3.018619 | 3.384645  |
| H  | 0.721704  | -3.599019 | 2.692373  |
| H  | -0.882845 | -3.497824 | 3.482572  |
| H  | 0.592423  | -2.962258 | 4.362785  |
| H  | 2.438294  | 1.758654  | 0.301001  |
| C  | 2.786616  | 2.610624  | -1.603602 |
| C  | 2.654977  | 3.986712  | -1.366897 |
| C  | 2.443077  | 2.127044  | -2.871279 |
| C  | 2.196119  | 4.847952  | -2.361391 |
| H  | 2.900877  | 4.390953  | -0.383020 |
| C  | 1.984309  | 2.986271  | -3.870604 |
| H  | 2.512394  | 1.057851  | -3.079264 |
| C  | 1.857295  | 4.351072  | -3.620647 |
| H  | 2.094723  | 5.914766  | -2.148989 |
| H  | 1.492269  | 5.024436  | -4.399217 |
| C  | 4.557787  | 2.055498  | 0.240770  |
| H  | 4.446495  | 3.128515  | 0.550339  |
| H  | 5.332541  | 2.103945  | -0.576990 |

|   |           |           |           |
|---|-----------|-----------|-----------|
| O | 4.840571  | 1.204797  | 1.235141  |
| H | -0.930291 | 2.704682  | -1.288861 |
| H | -1.254731 | 2.511496  | -3.013177 |
| B | -2.802727 | -1.110514 | -1.076364 |
| O | -3.992410 | -1.040718 | -0.393198 |
| O | -2.388318 | -2.406203 | -1.252005 |
| C | -4.497293 | -2.379301 | -0.233115 |
| C | -3.195843 | -3.246737 | -0.414203 |
| C | -2.417612 | -3.444984 | 0.886330  |
| H | -2.252986 | -2.489748 | 1.405557  |
| H | -2.936321 | -4.131832 | 1.570286  |
| H | -1.431174 | -3.866908 | 0.644687  |
| C | -3.413579 | -4.585593 | -1.101052 |
| H | -4.100145 | -5.213436 | -0.513764 |
| H | -3.825883 | -4.461778 | -2.110537 |
| H | -2.453036 | -5.112602 | -1.185561 |
| C | -5.528458 | -2.607704 | -1.336904 |
| H | -6.307840 | -1.836001 | -1.261861 |
| H | -5.068911 | -2.532195 | -2.333133 |
| H | -6.006593 | -3.593076 | -1.244127 |
| C | -5.151405 | -2.501065 | 1.134546  |
| H | -5.453260 | -3.541532 | 1.326316  |
| H | -4.472565 | -2.179265 | 1.934570  |
| H | -6.051732 | -1.870936 | 1.175455  |
| C | 1.097898  | -2.577259 | -3.345812 |
| H | 1.365902  | -1.524574 | -3.193848 |
| H | 1.797540  | -3.001473 | -4.084559 |
| H | 0.091477  | -2.611214 | -3.785129 |
| C | 3.095196  | -3.445668 | 1.225508  |
| H | 4.103181  | -3.302450 | 0.806639  |
| H | 2.814535  | -2.510439 | 1.728017  |
| H | 3.154383  | -4.233196 | 1.988894  |
| H | -0.245320 | -4.852294 | -2.775984 |
| H | 1.469479  | -5.643503 | 1.090369  |

108

Figure\_S5-1\_AA-9b(Na)-ts(1,6minor) / electronic energy: -4131.83618193 a.u. / lowest freq: -326.46 cm<sup>-1</sup>

|    |           |           |           |
|----|-----------|-----------|-----------|
| C  | -1.872866 | -2.485834 | 1.943345  |
| H  | -3.682318 | -1.248251 | 1.557371  |
| C  | -2.590814 | -1.244543 | 1.504419  |
| H  | -2.504522 | -3.379663 | 1.847701  |
| H  | -7.139356 | -3.354432 | -0.162828 |
| H  | -5.508330 | -1.500600 | -0.404607 |
| C  | -6.080164 | -3.578616 | -0.308969 |
| C  | -5.165290 | -2.538189 | -0.448183 |
| H  | -6.360964 | -5.722656 | -0.246685 |
| C  | -5.645900 | -4.904180 | -0.354799 |
| C  | -3.796232 | -2.791738 | -0.637635 |
| C  | -4.289133 | -5.172954 | -0.541623 |
| C  | -2.874373 | -1.647983 | -0.777482 |
| H  | -3.370248 | -0.678964 | -0.860874 |
| C  | -3.374907 | -4.131158 | -0.680865 |
| H  | -3.937195 | -6.206648 | -0.579779 |
| H  | -2.318287 | -4.366154 | -0.822215 |
| C  | -1.578968 | -1.753302 | -1.251353 |
| H  | -1.096330 | -2.726140 | -1.299673 |
| C  | -1.952603 | -0.012615 | 1.452936  |
| H  | -1.419263 | 0.313860  | -1.668529 |
| C  | -0.833975 | -0.608723 | -1.609773 |
| H  | 0.013062  | -0.620903 | 2.154341  |
| C  | -0.550254 | 0.139212  | 1.595973  |
| H  | -0.213310 | 1.162878  | 1.776427  |
| Cu | 0.538394  | -0.006112 | -0.169540 |
| C  | 2.296908  | 0.501133  | 0.632387  |
| N  | 2.728418  | 1.674274  | 1.131238  |
| H  | 1.521526  | -2.744920 | 4.838770  |
| N  | 3.188913  | -0.433178 | 0.936565  |
| C  | 1.274829  | -1.685682 | -2.623746 |
| O  | 0.922131  | -2.809443 | -1.982830 |
| C  | 0.468171  | -0.516230 | -2.250968 |
| O  | 1.974215  | 1.020360  | -3.319210 |
| C  | 0.869907  | 0.754838  | -2.864994 |
| C  | 3.102081  | -1.813526 | 0.501731  |
| C  | 4.396154  | 0.103404  | 1.570869  |
| H  | 5.221329  | 0.038573  | 0.846562  |
| C  | 3.984469  | 1.545151  | 1.880428  |
| H  | 3.805711  | 1.717167  | 2.954421  |
| C  | 2.076330  | 2.932948  | 0.989169  |
| C  | 2.334380  | 3.683683  | -0.173858 |
| C  | 1.266117  | 3.428202  | 2.022814  |
| C  | 1.702140  | 4.919963  | -0.319039 |
| C  | 0.647384  | 4.670689  | 1.836241  |
| C  | 0.853329  | 5.405479  | 0.675099  |
| H  | 0.360794  | 6.371927  | 0.546188  |
| Na | 3.926490  | -0.280615 | -2.810055 |
| H  | 4.721795  | 2.285207  | 1.537966  |
| H  | 4.661603  | -0.468610 | 2.471063  |
| O  | -0.108164 | 1.672802  | -2.870446 |
| O  | 2.190636  | -1.704440 | -3.429634 |
| C  | 1.638282  | -3.988206 | -2.317519 |

|   |           |           |           |
|---|-----------|-----------|-----------|
| H | 1.514608  | -4.232343 | -3.381536 |
| H | 1.213755  | -4.784699 | -1.696647 |
| H | 2.709197  | -3.864794 | -2.102245 |
| C | 0.203059  | 2.964261  | -3.366504 |
| H | 0.849921  | 3.505807  | -2.662245 |
| H | -0.752987 | 3.490203  | -3.461819 |
| H | 0.700222  | 2.901428  | -4.343285 |
| H | 2.333833  | -1.829739 | -0.285084 |
| C | 2.624327  | -2.739051 | 1.604218  |
| C | 2.446167  | -4.103657 | 1.334013  |
| C | 2.284506  | -2.272462 | 2.879543  |
| C | 1.946249  | -4.970482 | 2.303461  |
| H | 2.689463  | -4.493748 | 0.343960  |
| C | 1.784085  | -3.137463 | 3.853619  |
| H | 2.391464  | -1.211332 | 3.112471  |
| C | 1.611209  | -4.490732 | 3.570444  |
| H | 1.810484  | -6.028084 | 2.065739  |
| H | 1.214880  | -5.168436 | 4.329713  |
| C | 4.440836  | -2.207565 | -0.201187 |
| H | 4.289894  | -3.265528 | -0.544441 |
| H | 5.198318  | -2.312251 | 0.627751  |
| O | 4.777240  | -1.341632 | -1.165210 |
| H | -0.956900 | -2.644730 | 1.347521  |
| H | -1.551054 | -2.410658 | 2.997038  |
| B | -2.733112 | 1.269766  | 1.037463  |
| O | -3.901094 | 1.270715  | 0.319105  |
| O | -2.264562 | 2.537078  | 1.267299  |
| C | -4.334316 | 2.637798  | 0.176316  |
| C | -2.996139 | 3.430662  | 0.410843  |
| C | -2.162765 | 3.591536  | -0.859779 |
| H | -2.042431 | 2.632254  | -1.383703 |
| H | -2.611021 | 4.317881  | -1.552855 |
| H | -1.160024 | 3.945880  | -0.579723 |
| C | -3.167293 | 4.773039  | 1.102854  |
| H | -3.812319 | 5.433583  | 0.504410  |
| H | -3.608868 | 4.660849  | 2.101368  |
| H | -2.187169 | 5.257525  | 1.212695  |
| C | -5.379538 | 2.892948  | 1.260575  |
| H | -6.189041 | 2.156641  | 1.155032  |
| H | -4.946149 | 2.782302  | 2.265236  |
| H | -5.812806 | 3.899308  | 1.173446  |
| C | -4.944626 | 2.820521  | -1.204221 |
| H | -5.181214 | 3.879860  | -1.383576 |
| H | -4.263954 | 2.474545  | -1.992489 |
| H | -5.877992 | 2.244348  | -1.279717 |
| C | 1.094366  | 2.697262  | 3.328219  |
| H | 1.341399  | 1.631704  | 3.244781  |
| H | 1.750150  | 3.135731  | 4.097711  |
| H | 0.059200  | 2.780918  | 3.687374  |
| C | 3.296492  | 3.172175  | -1.210887 |
| H | 4.266346  | 2.913318  | -0.759677 |
| H | 2.912881  | 2.269728  | -1.705397 |
| H | 3.473029  | 3.928770  | -1.987535 |
| H | -0.003765 | 5.060678  | 2.622224  |
| H | 1.889426  | 5.515325  | -1.216154 |

108

Figure\_S5-1\_AA-9b(Na)-prod(1,6minor) / electronic energy: -4131.89527188 a.u. / lowest freq: 22.82 cm-1

|    |           |           |           |
|----|-----------|-----------|-----------|
| C  | 1.394849  | 1.937125  | -2.756669 |
| H  | 0.098919  | 3.479501  | -2.023850 |
| C  | 0.403146  | 2.460198  | -1.725160 |
| H  | 2.276582  | 2.590122  | -2.814258 |
| H  | 2.835519  | 6.862365  | 0.027038  |
| H  | 0.949715  | 5.251263  | 0.002083  |
| C  | 3.035070  | 5.794957  | -0.093054 |
| C  | 1.976159  | 4.888315  | -0.106089 |
| H  | 5.179490  | 6.045863  | -0.211312 |
| C  | 4.347049  | 5.338780  | -0.224387 |
| C  | 2.200852  | 3.513268  | -0.250438 |
| C  | 4.585361  | 3.972419  | -0.368789 |
| C  | 1.006247  | 2.574450  | -0.296031 |
| H  | 0.227332  | 3.037721  | 0.324728  |
| C  | 3.522571  | 3.069059  | -0.381051 |
| H  | 5.608416  | 3.602622  | -0.471805 |
| H  | 3.730423  | 2.003386  | -0.492244 |
| C  | 1.305535  | 1.214640  | 0.299028  |
| H  | 2.165386  | 0.678749  | -0.107748 |
| C  | -0.873629 | 1.635922  | -1.612724 |
| H  | -0.050099 | 1.384209  | 1.894011  |
| C  | 0.793943  | 0.801166  | 1.502190  |
| H  | -0.451378 | 0.152244  | -3.133567 |
| C  | -1.139181 | 0.524942  | -2.367790 |
| H  | -2.130485 | 0.064643  | -2.335220 |
| Cu | -0.265367 | -0.147889 | -0.490389 |
| C  | -0.373151 | -2.131976 | -0.576681 |
| N  | -1.454394 | -2.893173 | -0.824203 |
| H  | 2.052802  | -1.588560 | -5.026692 |
| N  | 0.691732  | -2.923423 | -0.543858 |
| C  | 2.672023  | -0.592548 | 2.503149  |
| O  | 3.490063  | 0.110819  | 1.684107  |



|    |           |           |           |
|----|-----------|-----------|-----------|
| C  | 1.275920  | -0.246977 | 2.385060  |
| O  | 0.539931  | -1.819604 | 4.042015  |
| C  | 0.356056  | -0.840918 | 3.321447  |
| C  | 2.053324  | -2.438263 | -0.388952 |
| C  | 0.385192  | -4.327213 | -0.841301 |
| H  | 0.830267  | -4.956333 | -0.060098 |
| C  | -1.144511 | -4.328313 | -0.854337 |
| H  | -1.569395 | -4.805029 | -1.748504 |
| C  | -2.790689 | -2.419570 | -0.939222 |
| C  | -3.521966 | -2.147158 | 0.226763  |
| C  | -3.351741 | -2.275131 | -2.219248 |
| C  | -4.846473 | -1.723381 | 0.091259  |
| C  | -4.674700 | -1.832057 | -2.313876 |
| C  | -5.418360 | -1.563830 | -1.167809 |
| H  | -6.452618 | -1.224310 | -1.257949 |
| Na | 2.065336  | -3.409897 | 3.298196  |
| H  | -1.576343 | -4.823520 | 0.031012  |
| H  | 0.812017  | -4.610335 | -1.817384 |
| O  | -0.847687 | -0.209803 | 3.364734  |
| O  | 3.171221  | -1.405471 | 3.278461  |
| C  | 4.877000  | -0.118117 | 1.826358  |
| H  | 5.220855  | 0.112632  | 2.845035  |
| H  | 5.370391  | 0.550740  | 1.110404  |
| H  | 5.133436  | -1.164435 | 1.600810  |
| C  | -1.763565 | -0.658320 | 4.344082  |
| H  | -1.943645 | -1.738807 | 4.260678  |
| H  | -2.696323 | -0.110031 | 4.167227  |
| H  | -1.392540 | -0.443283 | 5.357414  |
| H  | 2.012972  | -1.659040 | 0.383381  |
| C  | 2.596607  | -1.821979 | -1.661062 |
| C  | 3.755741  | -1.035769 | -1.595913 |
| C  | 1.996846  | -2.006054 | -2.912371 |
| C  | 4.302820  | -0.460944 | -2.740789 |
| H  | 4.224675  | -0.863034 | -0.626131 |
| C  | 2.541588  | -1.432344 | -4.062178 |
| H  | 1.081086  | -2.594902 | -2.994985 |
| C  | 3.698377  | -0.659025 | -3.982906 |
| H  | 5.202579  | 0.153597  | -2.660804 |
| H  | 4.121879  | -0.204938 | -4.881213 |
| C  | 2.957536  | -3.573742 | 0.194591  |
| H  | 3.965003  | -3.087322 | 0.303566  |
| H  | 3.108389  | -4.300012 | -0.656149 |
| O  | 2.463421  | -4.118494 | 1.312350  |
| H  | 1.747427  | 0.923332  | -2.510735 |
| H  | 0.942578  | 1.898845  | -3.758543 |
| B  | -2.036995 | 2.166233  | -0.699805 |
| O  | -2.003634 | 3.364042  | -0.047238 |
| O  | -3.189384 | 1.470049  | -0.479010 |
| C  | -3.306537 | 3.590572  | 0.529271  |
| C  | -3.900484 | 2.132857  | 0.587714  |
| C  | -3.548929 | 1.392221  | 1.875231  |
| H  | -2.467620 | 1.412049  | 2.076206  |
| H  | -4.076960 | 1.814547  | 2.741522  |
| H  | -3.846389 | 0.341439  | 1.764972  |
| C  | -5.394244 | 2.048226  | 0.320405  |
| H  | -5.951696 | 2.639600  | 1.061794  |
| H  | -5.646693 | 2.412860  | -0.683047 |
| H  | -5.722799 | 1.003006  | 0.395437  |
| C  | -4.062145 | 4.510907  | -0.426956 |
| H  | -3.485507 | 5.436621  | -0.563659 |
| H  | -4.195537 | 4.042207  | -1.412820 |
| H  | -5.051192 | 4.776083  | -0.028433 |
| C  | -3.132247 | 4.259133  | 1.883322  |
| H  | -4.104101 | 4.368767  | 2.386819  |
| H  | -2.461278 | 3.683904  | 2.533577  |
| H  | -2.701593 | 5.261608  | 1.748498  |
| C  | -2.546941 | -2.586937 | -3.452679 |
| H  | -1.520329 | -2.202737 | -3.367683 |
| H  | -2.472417 | -3.674011 | -3.616177 |
| H  | -3.010541 | -2.149095 | -4.346581 |
| C  | -2.875707 | -2.284296 | 1.576075  |
| H  | -2.377669 | -3.257826 | 1.696466  |
| H  | -2.104026 | -1.511204 | 1.715661  |
| H  | -3.616558 | -2.175461 | 2.379290  |
| H  | -5.125896 | -1.700201 | -3.300329 |
| H  | -5.435043 | -1.515514 | 0.988624  |

13

Figure\_S6-1\_thf / electronic energy: -232.213178364 a.u. / lowest freq: 60.28 cm-1

|   |           |           |           |
|---|-----------|-----------|-----------|
| C | -0.729532 | 0.989834  | -0.227142 |
| C | 0.729533  | 0.989833  | 0.227142  |
| C | -1.158358 | -0.431440 | 0.131766  |
| H | -0.791959 | 1.147286  | -1.315596 |
| H | -1.344762 | 1.756834  | 0.263102  |
| C | 1.158358  | -0.431441 | -0.131767 |
| H | 0.791960  | 1.147284  | 1.315597  |
| H | 1.344764  | 1.756833  | -0.263101 |
| O | 0.000000  | -1.238426 | 0.000001  |
| H | -1.950010 | -0.820430 | -0.528067 |
| H | -1.532900 | -0.480344 | 1.171812  |

|   |          |           |           |
|---|----------|-----------|-----------|
| H | 1.950011 | -0.820432 | 0.528064  |
| H | 1.532897 | -0.480344 | -1.171814 |

13

Figure\_S6-1\_PMe3 / electronic energy: -460.868416109 a.u. / lowest freq: 167.39 cm-1

|   |           |           |           |
|---|-----------|-----------|-----------|
| P | -0.000338 | 0.000102  | -0.594729 |
| C | 0.584291  | -1.525343 | 0.274538  |
| H | 1.620053  | -1.746096 | -0.024732 |
| H | 0.546134  | -1.418301 | 1.370846  |
| H | -0.041774 | -2.380912 | -0.020763 |
| C | 1.029583  | 1.268275  | 0.274512  |
| H | 2.082777  | 1.155899  | -0.024160 |
| H | 0.701219  | 2.276321  | -0.020713 |
| H | 0.959458  | 1.178298  | 1.370763  |
| C | -1.613350 | 0.256983  | 0.274797  |
| H | -2.321224 | -0.532226 | -0.020573 |
| H | -1.500738 | 0.241234  | 1.371091  |
| H | -2.043983 | 1.224754  | -0.023911 |

17

Figure\_S6-1\_Me2NHC / electronic energy: -305.693539420 a.u. / lowest freq: 35.85 cm-1

|   |           |           |           |
|---|-----------|-----------|-----------|
| C | -0.766605 | 1.222492  | -0.000015 |
| H | -1.194780 | 1.714234  | 0.889170  |
| C | 0.766606  | 1.222492  | 0.000015  |
| H | 1.194780  | 1.714234  | -0.889170 |
| C | 0.000000  | -1.018377 | 0.000000  |
| N | -1.072810 | -0.209587 | 0.000011  |
| N | 1.072810  | -0.209588 | -0.000011 |
| H | 1.194744  | 1.714191  | 0.889241  |
| H | -1.194744 | 1.714191  | -0.889241 |
| C | -2.440866 | -0.652458 | 0.000002  |
| H | -2.457478 | -1.749081 | 0.000023  |
| H | -2.979571 | -0.288634 | 0.892010  |
| H | -2.979552 | -0.288668 | -0.892032 |
| C | 2.440866  | -0.652458 | -0.000002 |
| H | 2.979551  | -0.288668 | 0.892032  |
| H | 2.457478  | -1.749081 | -0.000023 |
| H | 2.979572  | -0.288634 | -0.892010 |

13

Figure\_S6-1\_NaOPh / electronic energy: -468.853649444 a.u. / lowest freq: 15.68 cm-1

|    |           |           |           |
|----|-----------|-----------|-----------|
| C  | -1.912599 | -1.200838 | -0.011375 |
| C  | -0.521476 | -1.206572 | 0.015351  |
| C  | 0.241248  | 0.001459  | 0.028090  |
| C  | -0.524240 | 1.207747  | 0.015228  |
| C  | -1.915348 | 1.198823  | -0.011498 |
| C  | -2.633248 | -0.001829 | -0.025828 |
| H  | -2.448993 | -2.155315 | -0.021458 |
| H  | 0.025710  | -2.154567 | 0.026010  |
| H  | 0.020847  | 2.156944  | 0.025804  |
| H  | -2.453903 | 2.152085  | -0.021671 |
| H  | -3.725390 | -0.003095 | -0.047610 |
| O  | 1.527681  | 0.002959  | 0.048939  |
| Na | 3.632205  | -0.001133 | -0.037490 |

15

Figure\_S6-1\_NaOtBu / electronic energy: -395.117378571 a.u. / lowest freq: 32.67 cm-1

|    |           |           |           |
|----|-----------|-----------|-----------|
| O  | -0.737133 | -0.009141 | 0.003654  |
| C  | 0.624960  | -0.000675 | -0.000009 |
| C  | 1.181519  | -1.414753 | -0.289909 |
| H  | 2.284457  | -1.455957 | -0.304558 |
| H  | 0.819613  | -2.118024 | 0.477986  |
| H  | 0.809650  | -1.764308 | -1.267141 |
| C  | 1.175601  | 0.461725  | 1.370139  |
| H  | 2.278378  | 0.484748  | 1.411897  |
| H  | 0.800290  | 1.473434  | 1.596181  |
| H  | 0.814389  | -0.215472 | 2.161532  |
| C  | 1.165629  | 0.961801  | -1.084173 |
| H  | 0.789122  | 1.980374  | -0.894033 |
| H  | 2.268079  | 1.001909  | -1.121930 |
| H  | 0.797342  | 0.647083  | -2.074606 |
| Na | -2.786410 | -0.000841 | 0.000833  |

32

Figure\_S6-1\_dienoate / electronic energy: -841.927078481 a.u. / lowest freq: 24.55 cm-1

|   |           |           |           |
|---|-----------|-----------|-----------|
| C | -0.660544 | -0.726572 | 0.059153  |
| C | -1.860539 | -0.097447 | 0.115996  |
| H | -0.691600 | -1.818492 | -0.004770 |
| C | -1.976243 | 1.390665  | 0.160143  |
| C | -3.120576 | -0.891785 | 0.187355  |
| O | -3.041424 | 1.823605  | -0.507466 |
| O | -1.182749 | 2.134043  | 0.689285  |
| O | -4.147702 | -0.497504 | 0.683440  |
| O | -2.981802 | -2.118850 | -0.320932 |
| C | -4.097604 | -2.989729 | -0.195724 |
| H | -4.332384 | -3.170881 | 0.862818  |
| H | -3.810049 | -3.927003 | -0.683244 |
| H | -4.981752 | -2.562067 | -0.688186 |
| C | -3.254671 | 3.228152  | -0.535442 |
| H | -3.354009 | 3.627502  | 0.483524  |
| H | -4.184056 | 3.384216  | -1.092621 |
| H | -2.420438 | 3.737793  | -1.038016 |
| C | 0.656646  | -0.129211 | 0.062308  |
| H | 0.725624  | 0.955889  | 0.150505  |

|   |          |           |           |
|---|----------|-----------|-----------|
| C | 1.759981 | -0.902956 | -0.019704 |
| H | 1.621029 | -1.988149 | -0.089650 |
| C | 3.156351 | -0.453635 | -0.025165 |
| C | 4.175093 | -1.416830 | -0.109525 |
| C | 3.522207 | 0.902114  | 0.053056  |
| C | 5.517020 | -1.042840 | -0.114390 |
| H | 3.907556 | -2.474776 | -0.172060 |
| C | 4.861836 | 1.275255  | 0.048166  |
| H | 2.754752 | 1.675486  | 0.118691  |
| C | 5.863995 | 0.305241  | -0.035401 |
| H | 6.294080 | -1.807149 | -0.179427 |
| H | 5.127957 | 2.332459  | 0.111300  |
| H | 6.914980 | 0.602284  | -0.038425 |

45

Figure\_S6-1\_dienoate-NaOPh / electronic energy: -1310.80369108 a.u. / lowest freq: 9.19 cm-1

|    |           |           |           |
|----|-----------|-----------|-----------|
| C  | -2.280519 | 1.058943  | 0.160955  |
| C  | -0.972791 | 0.759991  | 0.397373  |
| H  | -2.492523 | 2.119446  | -0.001289 |
| C  | -0.449006 | -0.621179 | 0.591424  |
| C  | 0.034942  | 1.854588  | 0.429173  |
| O  | -1.307158 | -1.423887 | 1.202354  |
| O  | 0.646618  | -0.999504 | 0.232290  |
| O  | 1.218110  | 1.702543  | 0.660167  |
| O  | -0.486789 | 3.050717  | 0.197601  |
| C  | 0.399785  | 4.164684  | 0.223112  |
| H  | 0.869579  | 4.262632  | 1.211018  |
| H  | -0.215078 | 5.043918  | 0.006843  |
| H  | 1.182278  | 4.051912  | -0.539539 |
| C  | -0.910718 | -2.780849 | 1.389975  |
| H  | -0.714707 | -3.262803 | 0.422790  |
| H  | -1.748148 | -3.270133 | 1.896938  |
| H  | -0.006253 | -2.832517 | 2.010602  |
| C  | -3.420673 | 0.183443  | 0.055930  |
| H  | -3.280468 | -0.886532 | 0.204274  |
| C  | -4.639325 | 0.700315  | -0.221969 |
| H  | -4.716524 | 1.785054  | -0.358230 |
| C  | -5.898377 | -0.031874 | -0.369534 |
| C  | -7.056616 | 0.686856  | -0.709372 |
| C  | -6.000293 | -1.422727 | -0.185598 |
| C  | -8.279798 | 0.040129  | -0.865398 |
| H  | -6.991102 | 1.768074  | -0.854475 |
| C  | -7.222154 | -2.067509 | -0.339616 |
| H  | -5.118701 | -2.007872 | 0.083159  |
| C  | -8.365160 | -1.339218 | -0.680480 |
| H  | -9.169555 | 0.614400  | -1.131301 |
| H  | -7.287414 | -3.147303 | -0.191668 |
| H  | -9.322983 | -1.849627 | -0.800919 |
| Na | 2.738314  | 0.026362  | 0.134785  |
| O  | 4.811878  | -0.257394 | -0.155918 |
| C  | 6.075973  | -0.434498 | -0.306247 |
| C  | 6.673664  | -0.633931 | -1.589140 |
| C  | 6.983127  | -0.445127 | 0.798458  |
| C  | 8.042909  | -0.825632 | -1.743864 |
| H  | 6.013305  | -0.631839 | -2.462224 |
| C  | 8.350312  | -0.637983 | 0.629176  |
| H  | 6.565220  | -0.294828 | 1.798886  |
| C  | 8.904515  | -0.831336 | -0.641129 |
| H  | 8.450868  | -0.974195 | -2.749146 |
| H  | 9.001992  | -0.637470 | 1.509288  |
| H  | 9.978696  | -0.982607 | -0.768985 |

47

Figure\_S6-1\_dienoate-NaOtBu / electronic energy: -1237.06693666 a.u. / lowest freq: 12.59 cm-1

|    |           |           |           |
|----|-----------|-----------|-----------|
| H  | -1.833753 | 3.949419  | 0.466471  |
| O  | -5.266810 | -0.478539 | 0.274763  |
| Na | -3.268083 | -0.157523 | -0.088732 |
| H  | -0.477334 | 4.974139  | -0.121701 |
| C  | -1.058689 | 4.064810  | -0.303343 |
| O  | -1.787584 | 1.561143  | -0.649152 |
| O  | -0.130709 | 2.986648  | -0.243762 |
| H  | -1.535994 | 4.110015  | -1.291520 |
| C  | -0.609982 | 1.765070  | -0.433881 |
| O  | -1.117181 | -1.090407 | -0.102401 |
| C  | 0.437762  | 0.709610  | -0.379476 |
| H  | 1.920066  | 2.132359  | -0.065433 |
| C  | -0.044675 | -0.694245 | -0.506624 |
| C  | 1.738758  | 1.060428  | -0.184093 |
| H  | 0.313227  | -3.318985 | -0.244448 |
| C  | 2.907971  | 0.223838  | -0.074619 |
| H  | 4.165933  | 1.873551  | 0.259781  |
| C  | 4.116740  | 0.783254  | 0.159071  |
| H  | 2.795234  | -0.854035 | -0.184540 |
| O  | 0.822337  | -1.493562 | -1.110812 |
| C  | 0.463373  | -2.867964 | -1.234622 |
| H  | -0.458715 | -2.971303 | -1.821887 |
| C  | 5.398314  | 0.089747  | 0.303403  |
| H  | 6.449599  | 1.928958  | 0.729623  |
| H  | 4.666962  | -1.916703 | -0.093657 |
| C  | 6.541807  | 0.846716  | 0.608606  |
| C  | 5.535447  | -1.301777 | 0.149935  |

|   |           |           |           |
|---|-----------|-----------|-----------|
| H | 1.299218  | -3.350955 | -1.750211 |
| C | 7.783935  | 0.236166  | 0.761809  |
| C | 6.776094  | -1.910378 | 0.300800  |
| H | 8.661494  | 0.840021  | 1.001486  |
| C | 7.903842  | -1.144447 | 0.608224  |
| H | 6.868119  | -2.991150 | 0.176104  |
| H | 8.876380  | -1.626726 | 0.726827  |
| C | -6.596121 | -0.664280 | 0.500805  |
| C | -7.079392 | 0.200319  | 1.690602  |
| C | -6.895972 | -2.145868 | 0.832143  |
| C | -7.426772 | -0.272008 | -0.745113 |
| H | -6.515052 | -0.070295 | 2.598204  |
| H | -8.155809 | 0.081985  | 1.905079  |
| H | -6.884012 | 1.264390  | 1.478210  |
| H | -6.329065 | -2.444940 | 1.729225  |
| H | -6.564123 | -2.785005 | -0.002637 |
| H | -7.966194 | -2.343740 | 1.016964  |
| H | -8.512903 | -0.413042 | -0.606972 |
| H | -7.105775 | -0.878370 | -1.608349 |
| H | -7.243655 | 0.786952  | -0.991410 |

24

Figure\_S6-1\_Me2NHC-Cu-allenyl / electronic energy: -2062.03073671 a.u. / lowest freq: 16.19 cm-1

|    |           |           |           |
|----|-----------|-----------|-----------|
| C  | 2.918206  | 1.315894  | 0.091326  |
| H  | 3.172197  | 1.838768  | 1.027814  |
| C  | 3.315499  | -0.166410 | 0.114484  |
| H  | 3.900547  | -0.463518 | -0.771327 |
| C  | 0.986753  | 0.001938  | -0.023023 |
| Cu | -0.888943 | -0.488741 | -0.126170 |
| N  | 1.467261  | 1.248504  | -0.070934 |
| N  | 2.017665  | -0.838526 | 0.111392  |
| H  | 3.894306  | -0.441143 | 1.009295  |
| H  | 3.378330  | 1.869933  | -0.740626 |
| C  | -2.762590 | -0.927759 | -0.229714 |
| H  | -3.145854 | -1.915697 | -0.535398 |
| C  | -3.673890 | -0.041198 | 0.066597  |
| C  | -4.559952 | 0.891767  | 0.375842  |
| H  | -4.957585 | 1.574386  | -0.383123 |
| H  | -4.930838 | 1.010617  | 1.399723  |
| C  | 0.676712  | 2.451280  | -0.144453 |
| H  | -0.378542 | 2.179900  | -0.275011 |
| H  | 0.779042  | 3.047038  | 0.777227  |
| H  | 0.992071  | 3.072048  | -0.997685 |
| C  | 1.929271  | -2.276075 | 0.147590  |
| H  | 2.401143  | -2.673321 | 1.059948  |
| H  | 0.871323  | -2.567362 | 0.139575  |
| H  | 2.428683  | -2.724632 | -0.726592 |

20

Figure\_S6-1\_PMe3-Cu-allenyl / electronic energy: -2217.18081038 a.u. / lowest freq: 11.56 cm-1

|    |           |           |           |
|----|-----------|-----------|-----------|
| Cu | -0.560515 | -0.423375 | -0.001720 |
| C  | -2.432841 | -0.885632 | 0.001582  |
| H  | -2.795334 | -1.927022 | 0.005243  |
| C  | -3.361235 | 0.031770  | 0.000489  |
| C  | -4.267218 | 0.995319  | -0.000581 |
| H  | -4.662553 | 1.405817  | -0.936021 |
| H  | -4.659265 | 1.410908  | 0.933996  |
| P  | 1.600036  | 0.123265  | -0.000003 |
| C  | 2.748935  | -1.283966 | -0.218460 |
| H  | 2.546754  | -1.774384 | -1.181161 |
| H  | 3.795305  | -0.944626 | -0.195816 |
| H  | 2.586607  | -2.016869 | 0.584369  |
| C  | 2.107021  | 1.292052  | -1.312942 |
| H  | 1.880617  | 0.855999  | -2.296084 |
| H  | 1.540405  | 2.228072  | -1.209306 |
| H  | 3.183775  | 1.509070  | -1.250167 |
| C  | 2.192732  | 0.921893  | 1.535582  |
| H  | 2.020015  | 0.248277  | 2.386749  |
| H  | 3.265620  | 1.155807  | 1.467496  |
| H  | 1.628085  | 1.849223  | 1.706612  |

20

Figure\_S6-1\_thf-Cu-allenyl / electronic energy: -1988.50872863 a.u. / lowest freq: 20.89 cm-1

|    |           |           |           |
|----|-----------|-----------|-----------|
| Cu | 0.714206  | -0.401034 | 0.113501  |
| H  | 4.783325  | 1.122457  | -1.372535 |
| C  | 2.567809  | -0.755972 | 0.263593  |
| H  | 2.949020  | -1.725690 | 0.624440  |
| C  | 3.479970  | 0.127268  | -0.042341 |
| C  | 4.376686  | 1.045342  | -0.358341 |
| H  | 4.747372  | 1.759129  | 0.385423  |
| O  | -1.182423 | -0.029646 | -0.034374 |
| C  | -1.760853 | 1.282128  | 0.097494  |
| C  | -3.242015 | 1.026509  | 0.327848  |
| H  | -1.575036 | 1.839437  | -0.834212 |
| H  | -1.263521 | 1.798561  | 0.929444  |
| C  | -3.475433 | -0.262949 | -0.460272 |
| H  | -3.864528 | 1.863690  | -0.013772 |
| H  | -3.440759 | 0.864720  | 1.398220  |
| C  | -2.195155 | -1.039884 | -0.192530 |
| H  | -2.253447 | -1.624989 | 0.739048  |
| H  | -1.896049 | -1.704311 | -1.014265 |
| H  | -3.576986 | -0.046651 | -1.534605 |

H -4.368039 -0.813840 -0.136436

52

Figure\_S6-1\_PA-NaOPh-prod(1,6) / electronic energy: -3067.16986516 a.u. / lowest freq: 15.87 cm<sup>-1</sup>

H 0.512950 -1.374642 3.438628  
H 1.133220 0.187671 4.072802  
H 2.037448 -0.678257 2.793846  
C 1.034029 -0.445327 3.179759  
H -5.821882 -1.768640 2.501479  
C -5.610786 -1.300114 1.537564  
H -3.541000 -1.881806 1.565169  
O 0.244724 0.182880 2.187660  
H -7.631835 -0.581736 1.263511  
C -4.325207 -1.365036 1.005076  
C -6.624638 -0.636248 0.844603  
O 1.732901 1.839664 2.157541  
H -1.447678 -0.689578 1.093263  
C 0.712317 1.343750 1.679812  
C -4.026682 -0.768988 -0.227661  
C -1.586934 -0.210529 0.121835  
C -6.340465 -0.040028 -0.382733  
H -2.340770 -2.924065 -0.255211  
C -0.070167 1.835947 0.575473  
C -2.621962 -0.828394 -0.801515  
C -5.050919 -0.108158 -0.912866  
H -7.125971 0.483371 -0.932742  
Cu 0.361801 -0.774874 -0.782683  
C -1.032864 1.020787 -0.133173  
C -2.213468 -2.280247 -1.141012  
C -0.795582 -2.339713 -1.535210  
O 1.406646 3.662846 0.075201  
C 0.363201 -2.526833 -1.911092  
C 0.339623 3.065830 -0.065729  
H 1.283127 -2.892339 -2.342036  
H -2.619222 -0.261312 -1.746060  
H -4.836085 0.364763 -1.874976  
H -1.372471 1.487456 -1.064578  
H -2.846446 -2.701003 -1.937472  
O -0.579893 3.553327 -0.928596  
C -0.203996 4.679835 -1.696232  
H 0.037197 5.538212 -1.053164  
H 0.670292 4.459218 -2.327124  
H -1.065512 4.920794 -2.329749  
Na 3.060017 2.045602 0.286194  
O 2.165964 -0.029935 -0.586293  
C 3.188784 -0.833254 -0.385416  
C 4.474425 -0.500856 -0.878247  
C 3.079176 -2.038793 0.350932  
C 5.579858 -1.312346 -0.628786  
H 4.581350 0.404967 -1.483220  
C 4.187888 -2.845336 0.588794  
H 2.097839 -2.320612 0.744782  
C 5.451437 -2.492124 0.106363  
H 6.556131 -1.021784 -1.026790  
H 4.063103 -3.767073 1.163868  
H 6.318644 -3.127094 0.298127

52

Figure\_S6-1\_PA-NaOPh-ts(1,6) / electronic energy: -3067.12456351 a.u. / lowest freq: -446.87 cm<sup>-1</sup>

H -1.009210 0.171150 4.148180  
H 0.157209 1.523688 4.354905  
H 0.737307 -0.076555 3.802747  
C -0.097686 0.637104 3.758541  
H -5.810106 -1.959850 2.385206  
C -5.722000 -1.455491 1.420269  
H -3.603175 -1.162056 1.625675  
O -0.383920 0.993800 2.414939  
H -7.827193 -1.637035 0.957458  
C -4.478451 -0.998102 0.993383  
C -6.852892 -1.276094 0.620808  
O 1.644286 1.889001 2.270153  
H -2.030868 0.247457 1.180188  
C 0.587150 1.603763 1.726768  
C -4.337673 -0.346989 -0.242468  
C -2.018255 0.567885 0.140581  
C -6.726018 -0.637150 -0.611909  
H -2.953051 -2.387368 -1.125598  
C 0.242541 1.838683 0.320098  
C -3.030534 0.155140 -0.730566  
C -5.479938 -0.180397 -1.038718  
H -7.602753 -0.492286 -1.247160  
Cu 0.715863 -0.027687 -0.541097  
C -0.929098 1.307653 -0.342858  
C -2.456756 -1.680035 -1.796640  
C -1.097096 -1.709490 -1.844744  
O 2.235345 3.111834 -0.136679  
C 0.149666 -1.547370 -1.694597  
C 1.105399 2.758479 -0.439308  
H 1.016769 -2.131115 -2.013389  
H -3.081180 0.678534 -1.689392  
H -5.388196 0.318282 -2.007436

|    |           |           |           |
|----|-----------|-----------|-----------|
| H  | -1.043257 | 1.672591  | -1.367716 |
| H  | -3.013493 | -1.428354 | -2.704367 |
| O  | 0.540278  | 3.191485  | -1.573072 |
| C  | 1.338172  | 3.999971  | -2.423122 |
| H  | 1.635492  | 4.927724  | -1.915227 |
| H  | 2.242692  | 3.461934  | -2.740738 |
| H  | 0.715363  | 4.232083  | -3.293657 |
| Na | 3.524980  | 1.538235  | 0.959353  |
| O  | 2.606034  | -0.271406 | -0.079037 |
| C  | 3.236524  | -1.427299 | -0.087430 |
| C  | 4.578290  | -1.514608 | -0.528127 |
| C  | 2.625453  | -2.623245 | 0.357591  |
| C  | 5.266413  | -2.725675 | -0.514135 |
| H  | 5.065853  | -0.603694 | -0.888188 |
| C  | 3.320490  | -3.829619 | 0.363006  |
| H  | 1.588780  | -2.578032 | 0.703095  |
| C  | 4.647086  | -3.896540 | -0.070567 |
| H  | 6.302907  | -2.756358 | -0.862085 |
| H  | 2.816876  | -4.734190 | 0.715380  |
| H  | 5.187512  | -4.845371 | -0.064520 |

52

Figure\_S6-1\_PA-NaOPh-ed(1,6) / electronic energy: -3067.13714909 a.u. / lowest freq: 20.63 cm-1

|    |           |           |           |
|----|-----------|-----------|-----------|
| H  | -0.042410 | 1.880291  | 3.250955  |
| H  | -1.076882 | 0.631661  | 4.031767  |
| H  | -1.719871 | 1.607342  | 2.667279  |
| C  | -0.822939 | 1.130083  | 3.087123  |
| H  | 5.452829  | 2.708352  | 2.073243  |
| C  | 5.472971  | 1.874880  | 1.367623  |
| H  | 3.386517  | 1.443766  | 1.628848  |
| O  | -0.280737 | 0.202508  | 2.154337  |
| H  | 7.576753  | 2.101223  | 0.918384  |
| C  | 4.307502  | 1.156911  | 1.117672  |
| C  | 6.663458  | 1.535921  | 0.720744  |
| O  | -2.131433 | -1.015606 | 2.330396  |
| H  | 1.717479  | 0.170343  | 1.262965  |
| C  | -1.049094 | -0.828463 | 1.807018  |
| C  | 4.306260  | 0.079166  | 0.215240  |
| C  | 1.894396  | -0.581895 | 0.496819  |
| C  | 6.677348  | 0.472154  | -0.181117 |
| H  | 3.416531  | 1.222422  | -2.518255 |
| C  | -0.474350 | -1.645260 | 0.713330  |
| C  | 3.106629  | -0.713796 | -0.083166 |
| C  | 5.510529  | -0.246315 | -0.430014 |
| H  | 7.602132  | 0.201670  | -0.695399 |
| Cu | -0.665350 | -0.307696 | -0.836085 |
| C  | 0.787347  | -1.426273 | 0.089546  |
| C  | 2.701056  | 0.524089  | -2.964301 |
| C  | 1.410265  | 0.597533  | -2.685813 |
| O  | -2.464988 | -2.976802 | 0.416585  |
| C  | 0.159538  | 0.635765  | -2.338618 |
| C  | -1.264741 | -2.831251 | 0.279986  |
| H  | -0.523455 | 1.273432  | -2.921629 |
| H  | 3.238583  | -1.492845 | -0.839911 |
| H  | 5.525611  | -1.074556 | -1.143146 |
| H  | 1.065829  | -2.199018 | -0.631449 |
| H  | 3.094626  | -0.227431 | -3.656775 |
| O  | -0.519764 | -3.749084 | -0.327761 |
| C  | -1.195659 | -4.869421 | -0.885360 |
| H  | -1.711399 | -5.439794 | -0.101108 |
| H  | -1.928816 | -4.544375 | -1.636351 |
| H  | -0.422141 | -5.485782 | -1.354311 |
| Na | -3.859988 | -1.157383 | 0.725841  |
| O  | -2.565087 | 0.203756  | -0.603925 |
| C  | -2.927924 | 1.467433  | -0.539854 |
| C  | -4.261378 | 1.846717  | -0.825554 |
| C  | -2.033680 | 2.496413  | -0.157886 |
| C  | -4.675698 | 3.172206  | -0.716070 |
| H  | -4.964164 | 1.071974  | -1.146669 |
| C  | -2.457422 | 3.818772  | -0.056908 |
| H  | -0.993752 | 2.232797  | 0.057476  |
| C  | -3.781189 | 4.172973  | -0.329794 |
| H  | -5.715097 | 3.427036  | -0.941593 |
| H  | -1.738528 | 4.586410  | 0.242578  |
| H  | -4.108635 | 5.211246  | -0.245642 |

20

Figure\_S6-1\_NaOPh-Cu-allenyl / electronic energy: -2225.17069737 a.u. / lowest freq: 21.00 cm-1

|    |           |           |           |
|----|-----------|-----------|-----------|
| Na | -0.543228 | 2.682910  | -0.151317 |
| H  | -5.637693 | 0.533880  | 0.687349  |
| Cu | -1.190970 | -0.381703 | 0.098178  |
| C  | -5.108920 | 0.108731  | -0.172968 |
| C  | -3.998197 | -0.594685 | -0.020276 |
| C  | -2.879058 | -1.251261 | 0.127397  |
| H  | -2.984863 | -2.338988 | 0.274272  |
| H  | -5.548657 | 0.276120  | -1.162462 |
| O  | 0.376205  | 0.672359  | 0.069915  |
| C  | 1.610478  | 0.209227  | 0.025946  |
| C  | 2.711077  | 1.089336  | 0.141522  |
| C  | 1.899177  | -1.164982 | -0.139905 |
| H  | 2.517436  | 2.156672  | 0.281638  |

|   |          |           |           |
|---|----------|-----------|-----------|
| C | 4.020774 | 0.618886  | 0.088209  |
| C | 4.288220 | -0.741651 | -0.080072 |
| H | 4.846610 | 1.329753  | 0.181337  |
| C | 3.212311 | -1.625296 | -0.191601 |
| H | 5.316216 | -1.107429 | -0.121989 |
| H | 1.063450 | -1.866243 | -0.228401 |
| H | 3.396335 | -2.695089 | -0.323239 |

52

Figure\_S6-1\_PA-NaOPh-ed(1,4) / electronic energy: -3067.14378699 a.u. / lowest freq: 20.30 cm<sup>-1</sup>

|    |           |           |           |
|----|-----------|-----------|-----------|
| Cu | -1.598182 | -0.706478 | 1.726427  |
| C  | -0.002839 | -1.047713 | -1.210307 |
| C  | -1.165737 | -0.392401 | -1.488490 |
| H  | -0.117051 | -2.102972 | -0.942865 |
| C  | -1.276404 | 1.056876  | -1.792867 |
| C  | -2.431778 | -1.161831 | -1.332219 |
| O  | -0.159581 | 1.567889  | -2.289556 |
| O  | -2.274135 | 1.730491  | -1.627030 |
| O  | -3.504445 | -0.693421 | -0.999907 |
| O  | -2.271142 | -2.453639 | -1.572196 |
| C  | -3.350291 | -3.316281 | -1.232448 |
| H  | -3.540738 | -3.263032 | -0.151554 |
| H  | -3.027364 | -4.325710 | -1.506604 |
| H  | -4.257940 | -3.042659 | -1.786998 |
| C  | -0.113254 | 2.981493  | -2.461302 |
| H  | -0.896196 | 3.312764  | -3.156441 |
| H  | 0.876651  | 3.199427  | -2.874987 |
| H  | -0.240206 | 3.480963  | -1.490702 |
| C  | 1.345934  | -0.550222 | -1.112366 |
| H  | 1.550308  | 0.485311  | -1.375975 |
| C  | 2.314107  | -1.364087 | -0.635076 |
| H  | 2.034308  | -2.390302 | -0.369796 |
| C  | 3.715673  | -1.009696 | -0.400948 |
| C  | 4.584351  | -1.989296 | 0.107256  |
| C  | 4.229536  | 0.275130  | -0.654811 |
| C  | 5.924171  | -1.699796 | 0.354183  |
| H  | 4.197371  | -2.990969 | 0.310831  |
| C  | 5.566547  | 0.564270  | -0.406437 |
| H  | 3.578716  | 1.058666  | -1.047478 |
| C  | 6.418870  | -0.421571 | 0.098104  |
| H  | 6.584740  | -2.474673 | 0.748435  |
| H  | 5.950231  | 1.566819  | -0.606657 |
| H  | 7.468850  | -0.191492 | 0.290887  |
| C  | -1.532412 | -2.590842 | 2.006736  |
| H  | -2.168228 | -3.061535 | 2.776168  |
| C  | -0.779245 | -3.421281 | 1.339676  |
| C  | -0.010419 | -4.230735 | 0.627836  |
| H  | -0.373163 | -4.684659 | -0.300924 |
| H  | 1.005186  | -4.486184 | 0.949644  |
| Na | -3.707120 | 1.299771  | 0.180567  |
| O  | -1.841596 | 1.160087  | 1.479850  |
| C  | -0.874874 | 2.042839  | 1.342776  |
| C  | 0.488111  | 1.673154  | 1.267389  |
| C  | -1.170340 | 3.423678  | 1.245470  |
| C  | 1.488894  | 2.625567  | 1.094330  |
| H  | 0.743842  | 0.612968  | 1.349090  |
| C  | -0.162156 | 4.369313  | 1.078189  |
| H  | -2.215060 | 3.740838  | 1.310165  |
| C  | 1.178714  | 3.983920  | 0.995807  |
| H  | 2.530644  | 2.296181  | 1.040639  |
| H  | -0.428888 | 5.427523  | 1.007403  |
| H  | 1.965804  | 4.728921  | 0.862926  |

52

Figure\_S6-1\_PA-NaOPh-ts(1,4) / electronic energy: -3067.11795157 a.u. / lowest freq: -466.55 cm<sup>-1</sup>

|    |           |           |           |
|----|-----------|-----------|-----------|
| Cu | 2.171039  | 1.051917  | 1.059732  |
| C  | -1.446970 | 1.226914  | 0.005306  |
| C  | -0.196301 | 1.092740  | -0.647068 |
| H  | -1.827694 | 2.246558  | -0.032024 |
| C  | 0.341457  | -0.189827 | -1.106791 |
| C  | 0.527351  | 2.308046  | -1.004739 |
| O  | -0.047526 | -1.229635 | -0.358526 |
| O  | 1.062157  | -0.358313 | -2.079345 |
| O  | 1.581451  | 2.385207  | -1.629747 |
| O  | -0.070055 | 3.423573  | -0.561138 |
| C  | 0.634104  | 4.640452  | -0.726756 |
| H  | 1.591938  | 4.609229  | -0.186498 |
| H  | -0.006268 | 5.422651  | -0.304684 |
| H  | 0.829767  | 4.846510  | -1.788269 |
| C  | 0.321876  | -2.526812 | -0.808689 |
| H  | -0.107294 | -2.729256 | -1.800573 |
| H  | -0.086221 | -3.227946 | -0.072504 |
| H  | 1.414343  | -2.630462 | -0.854587 |
| C  | -2.508308 | 0.212951  | -0.019370 |
| H  | -2.203855 | -0.833048 | -0.045904 |
| C  | -3.808531 | 0.555445  | -0.014606 |
| H  | -4.063707 | 1.620820  | 0.036998  |
| C  | -4.959099 | -0.359855 | -0.065128 |
| C  | -6.254080 | 0.171938  | 0.043959  |
| C  | -4.824738 | -1.751035 | -0.219322 |
| C  | -7.377049 | -0.652798 | 0.008769  |

|    |           |           |           |
|----|-----------|-----------|-----------|
| H  | -6.379932 | 1.251345  | 0.162167  |
| C  | -5.945279 | -2.574852 | -0.256371 |
| H  | -3.833538 | -2.198281 | -0.318162 |
| C  | -7.226764 | -2.030514 | -0.141309 |
| H  | -8.373756 | -0.215380 | 0.099205  |
| H  | -5.818335 | -3.652632 | -0.379589 |
| H  | -8.104004 | -2.680496 | -0.170846 |
| C  | 1.208719  | 1.884271  | 2.501669  |
| H  | 1.806950  | 2.236712  | 3.347376  |
| C  | -0.047087 | 1.699753  | 2.450777  |
| C  | -1.351767 | 1.438518  | 2.167954  |
| H  | -2.052101 | 2.277656  | 2.147925  |
| H  | -1.769196 | 0.487991  | 2.514802  |
| Na | 3.067127  | 0.769491  | -2.188009 |
| O  | 3.373502  | 0.054103  | -0.038812 |
| C  | 3.545852  | -1.235048 | 0.172784  |
| C  | 3.075560  | -1.884803 | 1.338773  |
| C  | 4.206255  | -2.039325 | -0.785343 |
| C  | 3.232312  | -3.255724 | 1.516542  |
| H  | 2.565355  | -1.285575 | 2.099933  |
| C  | 4.356029  | -3.411520 | -0.599795 |
| H  | 4.595118  | -1.566310 | -1.691766 |
| C  | 3.868330  | -4.037720 | 0.549301  |
| H  | 2.845415  | -3.721880 | 2.426867  |
| H  | 4.863851  | -4.001196 | -1.368077 |
| H  | 3.987183  | -5.113657 | 0.691349  |

52

Figure\_S6-1\_PA-NaOPH-prod(1,4) / electronic energy: -3067.17831935 a.u. / lowest freq: 16.86 cm-1

|    |           |           |           |
|----|-----------|-----------|-----------|
| Cu | -1.598615 | -0.354991 | -0.780455 |
| C  | 1.331513  | -0.405435 | -0.961682 |
| C  | 0.349308  | 0.042758  | 0.138381  |
| H  | 1.338389  | 0.407317  | -1.697590 |
| C  | 0.094780  | -0.814104 | 1.286416  |
| C  | 0.216836  | 1.478096  | 0.360051  |
| O  | 0.659901  | -2.034870 | 1.165551  |
| O  | -0.575688 | -0.558553 | 2.283496  |
| O  | -0.354704 | 2.043128  | 1.288325  |
| O  | 0.792474  | 2.217481  | -0.608631 |
| C  | 0.654171  | 3.622433  | -0.513192 |
| H  | -0.404887 | 3.918248  | -0.533014 |
| H  | 1.171983  | 4.039271  | -1.384476 |
| H  | 1.110405  | 4.006038  | 0.410318  |
| C  | 0.386519  | -2.975947 | 2.187753  |
| H  | 0.762650  | -2.625604 | 3.159341  |
| H  | 0.903227  | -3.898116 | 1.898843  |
| H  | -0.693307 | -3.163882 | 2.274584  |
| C  | 2.740514  | -0.572016 | -0.458155 |
| H  | 2.887657  | -1.361758 | 0.285916  |
| C  | 3.762940  | 0.200013  | -0.848058 |
| H  | 3.561805  | 0.983953  | -1.587804 |
| C  | 5.161330  | 0.128605  | -0.382362 |
| C  | 6.095502  | 1.039270  | -0.900301 |
| C  | 5.611347  | -0.811116 | 0.561159  |
| C  | 7.429092  | 1.017139  | -0.494650 |
| H  | 5.766570  | 1.778995  | -1.635120 |
| C  | 6.942268  | -0.835090 | 0.967300  |
| H  | 4.913136  | -1.535874 | 0.985181  |
| C  | 7.859031  | 0.078860  | 0.442219  |
| H  | 8.135646  | 1.738083  | -0.912371 |
| H  | 7.268810  | -1.574684 | 1.701970  |
| H  | 8.902855  | 0.057211  | 0.763052  |
| C  | -1.741928 | -1.480610 | -2.499290 |
| H  | -2.641875 | -1.620582 | -3.079501 |
| C  | -0.577249 | -1.513413 | -2.082934 |
| C  | 0.845515  | -1.657019 | -1.726522 |
| H  | 1.442395  | -1.806842 | -2.639786 |
| H  | 0.953475  | -2.557590 | -1.105637 |
| Na | -2.188885 | 1.071936  | 2.212987  |
| O  | -3.033548 | 0.527371  | 0.166161  |
| C  | -4.326650 | 0.325454  | 0.031790  |
| C  | -4.865826 | -0.855223 | -0.530867 |
| C  | -5.248291 | 1.300755  | 0.483555  |
| C  | -6.241725 | -1.040541 | -0.639331 |
| H  | -4.174748 | -1.631035 | -0.871890 |
| C  | -6.622424 | 1.104648  | 0.372484  |
| H  | -4.852596 | 2.224769  | 0.915457  |
| C  | -7.136633 | -0.065948 | -0.191144 |
| H  | -6.622163 | -1.966542 | -1.079837 |
| H  | -7.304491 | 1.881933  | 0.728595  |
| H  | -8.214472 | -0.215742 | -0.280845 |

24

Figure\_S6-1\_Me2NHC-Cu-allenyl / electronic energy: -2062.03073671 a.u. / lowest freq: 16.19 cm-1

|    |           |           |           |
|----|-----------|-----------|-----------|
| C  | 2.918206  | 1.315894  | 0.091326  |
| H  | 3.172197  | 1.838768  | 1.027814  |
| C  | 3.315499  | -0.166410 | 0.114484  |
| H  | 3.900547  | -0.463518 | -0.771327 |
| C  | 0.986753  | 0.001938  | -0.023023 |
| Cu | -0.888943 | -0.488741 | -0.126170 |
| N  | 1.467261  | 1.248504  | -0.070934 |



|   |           |           |           |
|---|-----------|-----------|-----------|
| N | 2.017665  | -0.838526 | 0.111392  |
| H | 3.894306  | -0.441143 | 1.009295  |
| H | 3.378330  | 1.869933  | -0.740626 |
| C | -2.762590 | -0.927759 | -0.229714 |
| H | -3.145854 | -1.915697 | -0.535398 |
| C | -3.673890 | -0.041198 | 0.066597  |
| C | -4.559952 | 0.891767  | 0.375842  |
| H | -4.957585 | 1.574386  | -0.383123 |
| H | -4.930838 | 1.010617  | 1.399723  |
| C | 0.676712  | 2.451280  | -0.144453 |
| H | -0.378542 | 2.179900  | -0.275011 |
| H | 0.779042  | 3.047038  | 0.777227  |
| H | 0.992071  | 3.072048  | -0.997685 |
| C | 1.929271  | -2.276075 | 0.147590  |
| H | 2.401143  | -2.673321 | 1.059948  |
| H | 0.871323  | -2.567362 | 0.139575  |
| H | 2.428683  | -2.724632 | -0.726592 |

20

Figure\_S6-1\_PMe3-Cu-allenyl / electronic energy: -2217.18081038 a.u. / lowest freq: 11.56 cm-1

|    |           |           |           |
|----|-----------|-----------|-----------|
| Cu | -0.560515 | -0.423375 | -0.001720 |
| C  | -2.432841 | -0.885632 | 0.001582  |
| H  | -2.795334 | -1.927022 | 0.005243  |
| C  | -3.361235 | 0.031770  | 0.000489  |
| C  | -4.267218 | 0.995319  | -0.000581 |
| H  | -4.662553 | 1.405817  | -0.936021 |
| H  | -4.659265 | 1.410908  | 0.933996  |
| P  | 1.600036  | 0.123265  | -0.000003 |
| C  | 2.748935  | -1.283966 | -0.218460 |
| H  | 2.546754  | -1.774384 | -1.181161 |
| H  | 3.795305  | -0.944626 | -0.195816 |
| H  | 2.586607  | -2.016869 | 0.584369  |
| C  | 2.107021  | 1.292052  | -1.312942 |
| H  | 1.880617  | 0.855999  | -2.296084 |
| H  | 1.540405  | 2.228072  | -1.209306 |
| H  | 3.183775  | 1.509070  | -1.250167 |
| C  | 2.192732  | 0.921893  | 1.535582  |
| H  | 2.020015  | 0.248277  | 2.386749  |
| H  | 3.265620  | 1.155807  | 1.467496  |
| H  | 1.628085  | 1.849223  | 1.706612  |

20

Figure\_S6-1\_thf-Cu-allenyl / electronic energy: -1988.50872863 a.u. / lowest freq: 20.89 cm-1

|    |           |           |           |
|----|-----------|-----------|-----------|
| Cu | 0.714206  | -0.401034 | 0.113501  |
| H  | 4.783325  | 1.122457  | -1.372535 |
| C  | 2.567809  | -0.755972 | 0.263593  |
| H  | 2.949020  | -1.725690 | 0.624440  |
| C  | 3.479970  | 0.127268  | -0.042341 |
| C  | 4.376686  | 1.045342  | -0.358341 |
| H  | 4.747372  | 1.759129  | 0.385423  |
| O  | -1.182423 | -0.029646 | -0.034374 |
| C  | -1.760853 | 1.282128  | 0.097494  |
| C  | -3.242015 | 1.026509  | 0.327848  |
| H  | -1.575036 | 1.839437  | -0.834212 |
| H  | -1.263521 | 1.798561  | 0.929444  |
| C  | -3.475433 | -0.262949 | -0.460272 |
| H  | -3.864528 | 1.863690  | -0.013772 |
| H  | -3.440759 | 0.864720  | 1.398220  |
| C  | -2.195155 | -1.039884 | -0.192530 |
| H  | -2.253447 | -1.624989 | 0.739048  |
| H  | -1.896049 | -1.704311 | -1.014265 |
| H  | -3.576986 | -0.046651 | -1.534605 |
| H  | -4.368039 | -0.813840 | -0.136436 |

54

Figure\_S6-1\_PA-NaOtBu-prod(1,6) / electronic energy: -2993.44684250 a.u. / lowest freq: 17.57 cm-1

|    |           |           |           |
|----|-----------|-----------|-----------|
| H  | 0.082203  | -0.887277 | 3.872751  |
| H  | 0.980305  | 0.614273  | 4.280520  |
| H  | 1.796925  | -0.689235 | 3.375486  |
| C  | 0.837822  | -0.172771 | 3.525431  |
| H  | -5.548494 | -1.354786 | 2.538401  |
| C  | -5.327171 | -0.788078 | 1.631024  |
| H  | -3.369673 | -1.652515 | 1.413990  |
| O  | 0.345672  | 0.362948  | 2.313948  |
| H  | -7.231339 | 0.237211  | 1.617441  |
| C  | -4.099659 | -0.955327 | 0.993250  |
| C  | -6.269743 | 0.104118  | 1.116900  |
| O  | 2.248774  | 1.506203  | 2.134204  |
| H  | -1.187265 | -0.538661 | 0.983925  |
| C  | 1.149952  | 1.225376  | 1.657958  |
| C  | -3.790145 | -0.236341 | -0.169160 |
| C  | -1.281495 | -0.019049 | 0.027894  |
| C  | -5.973557 | 0.825258  | -0.038528 |
| H  | -2.371251 | -2.568445 | -0.588522 |
| C  | 0.570319  | 1.730606  | 0.435639  |
| C  | -2.449280 | -0.403181 | -0.861385 |
| C  | -4.743220 | 0.653881  | -0.674321 |
| H  | -6.702862 | 1.528118  | -0.447952 |
| Cu | 0.578107  | -0.972567 | -0.983199 |
| C  | -0.538108 | 1.100384  | -0.238462 |
| C  | -2.270915 | -1.836345 | -1.406643 |
| C  | -0.931608 | -1.994471 | -1.992452 |

|    |           |           |           |
|----|-----------|-----------|-----------|
| O  | 2.414465  | 3.165998  | -0.113621 |
| C  | 0.128374  | -2.232368 | -2.575962 |
| C  | 1.251616  | 2.792240  | -0.270355 |
| H  | 0.886645  | -2.592689 | -3.254235 |
| H  | -2.440646 | 0.270512  | -1.733112 |
| H  | -4.517307 | 1.224730  | -1.579170 |
| H  | -0.806529 | 1.614958  | -1.167407 |
| H  | -3.041410 | -2.080693 | -2.154773 |
| O  | 0.490714  | 3.387735  | -1.217406 |
| C  | 1.124226  | 4.351602  | -2.034531 |
| H  | 1.480675  | 5.206292  | -1.441720 |
| H  | 1.981047  | 3.919034  | -2.572514 |
| H  | 0.368330  | 4.689161  | -2.753026 |
| Na | 3.501731  | 1.122640  | 0.183268  |
| O  | 2.381523  | -0.786411 | -0.309723 |
| C  | 3.022149  | -1.952858 | 0.118867  |
| C  | 2.041547  | -2.850750 | 0.893520  |
| H  | 1.227710  | -3.183907 | 0.227083  |
| H  | 2.526380  | -3.748942 | 1.308292  |
| H  | 1.592067  | -2.279249 | 1.719140  |
| C  | 3.587029  | -2.731482 | -1.080023 |
| H  | 4.133879  | -3.636482 | -0.769550 |
| H  | 2.770197  | -3.040566 | -1.749420 |
| H  | 4.273765  | -2.091481 | -1.656351 |
| C  | 4.184138  | -1.573063 | 1.055824  |
| H  | 4.681165  | -2.458177 | 1.481317  |
| H  | 4.957100  | -1.004624 | 0.509492  |
| H  | 3.811430  | -0.957230 | 1.890603  |

54

Figure\_S6-1\_PA-NaOtBu-ts(1,6) / electronic energy: -2993.40265452 a.u. / lowest freq: -461.31 cm-1

|    |           |           |           |
|----|-----------|-----------|-----------|
| H  | 0.389511  | 1.672320  | 3.661517  |
| H  | -0.929355 | 0.640242  | 4.316437  |
| H  | -1.304073 | 1.899287  | 3.103526  |
| C  | -0.552780 | 1.164920  | 3.427513  |
| H  | 5.446222  | 2.458933  | 1.556763  |
| C  | 5.382473  | 1.494258  | 1.048171  |
| H  | 3.237129  | 1.562866  | 0.912298  |
| O  | -0.255539 | 0.251342  | 2.384838  |
| H  | 7.523531  | 1.185947  | 1.031387  |
| C  | 4.137268  | 0.984681  | 0.691243  |
| C  | 6.547523  | 0.782859  | 0.752728  |
| O  | -2.387856 | -0.374292 | 2.397420  |
| H  | 1.532994  | 0.205727  | 1.118582  |
| C  | -1.272012 | -0.481135 | 1.909539  |
| C  | 4.028235  | -0.251214 | 0.033941  |
| C  | 1.559227  | -0.600515 | 0.388291  |
| C  | 6.453736  | -0.442287 | 0.093887  |
| H  | 3.206826  | 1.021603  | -2.119645 |
| C  | -0.889358 | -1.353978 | 0.797742  |
| C  | 2.718698  | -0.821861 | -0.363448 |
| C  | 5.206024  | -0.951188 | -0.264071 |
| H  | 7.358215  | -1.006641 | -0.144615 |
| Cu | -0.874790 | 0.022965  | -0.845375 |
| C  | 0.402331  | -1.358716 | 0.148796  |
| C  | 2.614558  | 0.126999  | -2.335849 |
| C  | 1.293695  | 0.302605  | -2.614682 |
| O  | -3.082502 | -2.320680 | 0.561528  |
| C  | 0.034051  | 0.424626  | -2.584691 |
| C  | -1.877745 | -2.348253 | 0.352965  |
| H  | -0.689871 | 0.774191  | -3.321789 |
| H  | 2.786077  | -1.791075 | -0.864321 |
| H  | 5.140272  | -1.912275 | -0.781253 |
| H  | 0.531801  | -2.184283 | -0.555840 |
| H  | 3.157635  | -0.681597 | -2.833852 |
| O  | -1.340492 | -3.337241 | -0.374261 |
| C  | -2.235205 | -4.275343 | -0.949118 |
| H  | -2.785185 | -4.822498 | -0.170849 |
| H  | -2.957266 | -3.775141 | -1.610245 |
| H  | -1.616166 | -4.968459 | -1.528778 |
| Na | -3.948796 | -0.165152 | 0.662584  |
| O  | -2.515194 | 1.017405  | -0.575691 |
| C  | -2.572593 | 2.407171  | -0.672180 |
| C  | -1.266411 | 3.038899  | -0.160551 |
| H  | -0.420243 | 2.728182  | -0.795067 |
| H  | -1.305707 | 4.140232  | -0.155923 |
| H  | -1.066000 | 2.692337  | 0.865444  |
| C  | -2.813473 | 2.836538  | -2.128282 |
| H  | -2.912003 | 3.929520  | -2.229455 |
| H  | -1.976618 | 2.511239  | -2.763661 |
| H  | -3.734513 | 2.369472  | -2.511254 |
| C  | -3.738368 | 2.907916  | 0.199221  |
| H  | -3.852497 | 4.002675  | 0.159883  |
| H  | -4.687913 | 2.461542  | -0.140817 |
| H  | -3.573730 | 2.622155  | 1.251309  |

54

Figure\_S6-1\_PA-NaOtBu-ed(1,6) / electronic energy: -2993.41544293 a.u. / lowest freq: 9.58 cm-1

|   |           |           |          |
|---|-----------|-----------|----------|
| H | -0.235368 | -1.766587 | 3.627129 |
| H | 1.028179  | -0.665747 | 4.280757 |
| H | 1.467518  | -1.906946 | 3.067358 |

|    |           |           |           |
|----|-----------|-----------|-----------|
| C  | 0.680383  | -1.213087 | 3.394243  |
| H  | -5.528973 | -2.400294 | 1.759176  |
| C  | -5.457747 | -1.465490 | 1.198614  |
| H  | -3.315459 | -1.399408 | 1.338811  |
| O  | 0.337442  | -0.316144 | 2.347500  |
| H  | -7.592957 | -1.305450 | 0.893672  |
| C  | -4.209524 | -0.896698 | 0.964609  |
| C  | -6.615323 | -0.853650 | 0.712375  |
| O  | 2.417473  | 0.461599  | 2.380931  |
| H  | -1.534701 | -0.196663 | 1.238740  |
| C  | 1.304766  | 0.477020  | 1.887601  |
| C  | -4.090019 | 0.300895  | 0.238735  |
| C  | -1.607323 | 0.605649  | 0.507380  |
| C  | -6.512678 | 0.333141  | -0.013016 |
| H  | -3.392248 | -1.050294 | -2.608263 |
| C  | 0.883162  | 1.321034  | 0.748775  |
| C  | -2.795882 | 0.937323  | -0.040106 |
| C  | -5.262609 | 0.901098  | -0.247860 |
| H  | -7.410937 | 0.817478  | -0.402295 |
| Cu | 0.855051  | -0.047667 | -0.813921 |
| C  | -0.392243 | 1.293837  | 0.113003  |
| C  | -2.686875 | -0.264527 | -2.897302 |
| C  | -1.385311 | -0.408017 | -2.712865 |
| O  | 3.058435  | 2.321759  | 0.442719  |
| C  | -0.118312 | -0.532445 | -2.456490 |
| C  | 1.851175  | 2.352142  | 0.287481  |
| H  | 0.508644  | -0.984316 | -3.240861 |
| H  | -2.829113 | 1.774080  | -0.744097 |
| H  | -5.187394 | 1.828584  | -0.821649 |
| H  | -0.555073 | 2.107017  | -0.597724 |
| H  | -3.104185 | 0.643371  | -3.345059 |
| O  | 1.266633  | 3.351616  | -0.369242 |
| C  | 2.117461  | 4.330413  | -0.950583 |
| H  | 2.691116  | 4.856016  | -0.175071 |
| H  | 2.815522  | 3.866254  | -1.661143 |
| H  | 1.458520  | 5.031135  | -1.473240 |
| Na | 4.031173  | 0.226041  | 0.663799  |
| O  | 2.531437  | -0.972392 | -0.470891 |
| C  | 2.680226  | -2.345622 | -0.669658 |
| C  | 1.407949  | -3.096331 | -0.241159 |
| H  | 0.555233  | -2.786485 | -0.865996 |
| H  | 1.520078  | -4.189141 | -0.327164 |
| H  | 1.169330  | -2.851653 | 0.806159  |
| C  | 2.983545  | -2.647748 | -2.145440 |
| H  | 3.141284  | -3.723587 | -2.324815 |
| H  | 2.150604  | -2.313129 | -2.780046 |
| H  | 3.890759  | -2.108264 | -2.460900 |
| C  | 3.855932  | -2.839970 | 0.192736  |
| H  | 4.012866  | -3.925993 | 0.099270  |
| H  | 4.794341  | -2.345808 | -0.110287 |
| H  | 3.667127  | -2.613580 | 1.254882  |

22

Figure\_S6-1\_Na0tBu-Cu-allenyl / electronic energy: -2151.45184434 a.u. / lowest freq: -9.22 cm<sup>-1</sup>

|    |           |           |           |
|----|-----------|-----------|-----------|
| H  | 4.987078  | 0.961943  | -0.906549 |
| Cu | 0.711587  | -0.397172 | -0.003208 |
| C  | 4.546878  | 0.574839  | 0.019375  |
| C  | 3.528174  | -0.271277 | 0.000018  |
| C  | 2.493597  | -1.067705 | -0.018893 |
| H  | 2.727964  | -2.145100 | -0.052502 |
| H  | 4.996617  | 0.907908  | 0.961539  |
| Na | -0.436856 | 2.561157  | -0.009909 |
| O  | -0.950325 | 0.448873  | -0.002369 |
| C  | -2.159353 | -0.248036 | 0.005002  |
| C  | -3.304506 | 0.770563  | -0.099412 |
| C  | -2.299522 | -1.045802 | 1.310931  |
| C  | -2.224548 | -1.210900 | -1.191136 |
| H  | -3.267243 | 1.473008  | 0.749496  |
| H  | -4.294272 | 0.287592  | -0.097003 |
| H  | -3.209583 | 1.349685  | -1.032359 |
| H  | -2.227265 | -0.367285 | 2.175425  |
| H  | -1.481916 | -1.780952 | 1.387314  |
| H  | -3.258338 | -1.585723 | 1.370608  |
| H  | -1.414456 | -1.954868 | -1.116945 |
| H  | -2.085989 | -0.653157 | -2.130574 |
| H  | -3.184920 | -1.748887 | -1.242772 |

54

Figure\_S6-1\_PA-Na0tBu-ed(1,4) / electronic energy: -2993.41491749 a.u. / lowest freq: 12.10 cm<sup>-1</sup>

|    |           |           |           |
|----|-----------|-----------|-----------|
| Cu | 2.126522  | 0.205303  | 1.156487  |
| C  | -1.509619 | 1.127227  | -0.744661 |
| C  | -0.225062 | 0.926429  | -1.140475 |
| H  | -1.777254 | 2.160790  | -0.519016 |
| C  | 0.333304  | -0.395030 | -1.537576 |
| C  | 0.717156  | 2.073336  | -1.191729 |
| O  | -0.135473 | -1.400189 | -0.816000 |
| O  | 1.140001  | -0.549741 | -2.432472 |
| O  | 1.898412  | 1.993665  | -1.475153 |
| O  | 0.152764  | 3.226802  | -0.868103 |
| C  | 1.011096  | 4.350092  | -0.723545 |
| H  | 1.755134  | 4.158091  | 0.062101  |

|    |           |           |           |
|----|-----------|-----------|-----------|
| H  | 0.366857  | 5.187306  | -0.436540 |
| H  | 1.525671  | 4.572557  | -1.668240 |
| C  | 0.466174  | -2.674798 | -1.033559 |
| H  | 0.318310  | -3.006128 | -2.070345 |
| H  | -0.028036 | -3.361717 | -0.339001 |
| H  | 1.537445  | -2.589040 | -0.804271 |
| C  | -2.578172 | 0.165388  | -0.615091 |
| H  | -2.370589 | -0.882188 | -0.834168 |
| C  | -3.801374 | 0.567197  | -0.207064 |
| H  | -3.941242 | 1.631550  | 0.013345  |
| C  | -4.989257 | -0.269064 | -0.012646 |
| C  | -6.183187 | 0.342752  | 0.403329  |
| C  | -4.987492 | -1.659851 | -0.221970 |
| C  | -7.340566 | -0.405927 | 0.603247  |
| H  | -6.200086 | 1.422496  | 0.572248  |
| C  | -6.142908 | -2.407140 | -0.022055 |
| H  | -4.074568 | -2.165942 | -0.541158 |
| C  | -7.323351 | -1.783777 | 0.390590  |
| H  | -8.258729 | 0.088269  | 0.927224  |
| H  | -6.124033 | -3.486331 | -0.187706 |
| H  | -8.228903 | -2.373710 | 0.547145  |
| C  | 1.253349  | 1.428993  | 2.336240  |
| H  | 1.848699  | 1.803242  | 3.189475  |
| C  | 0.039225  | 1.905198  | 2.300323  |
| C  | -1.194899 | 2.379316  | 2.241811  |
| H  | -1.420340 | 3.301128  | 1.694366  |
| H  | -2.031446 | 1.868106  | 2.730663  |
| Na | 3.305033  | 0.197411  | -1.867400 |
| O  | 3.112610  | -0.934012 | 0.031214  |
| C  | 4.063610  | -1.806500 | 0.565595  |
| C  | 3.418214  | -2.728038 | 1.614051  |
| H  | 4.140075  | -3.443242 | 2.040582  |
| H  | 3.003109  | -2.122040 | 2.436072  |
| H  | 2.590340  | -3.297321 | 1.164394  |
| C  | 5.203494  | -1.014773 | 1.229019  |
| H  | 5.985564  | -1.672883 | 1.641321  |
| H  | 5.672625  | -0.337681 | 0.496832  |
| H  | 4.800912  | -0.398321 | 2.049249  |
| C  | 4.636888  | -2.661926 | -0.576205 |
| H  | 5.376046  | -3.394852 | -0.216010 |
| H  | 3.826745  | -3.210141 | -1.082527 |
| H  | 5.136946  | -2.024131 | -1.324411 |

54

Figure\_S6-1\_PA-NaOtBu-ts(1,4) / electronic energy: -2993.39686790 a.u. / lowest freq: -458.66 cm<sup>-1</sup>

|    |           |           |           |
|----|-----------|-----------|-----------|
| Cu | 2.316292  | 0.318045  | 0.979296  |
| C  | -1.448085 | 1.022464  | 0.007992  |
| C  | -0.255097 | 0.700903  | -0.682286 |
| H  | -1.675654 | 2.087309  | -0.026179 |
| C  | 0.137913  | -0.666861 | -1.009917 |
| C  | 0.606422  | 1.789610  | -1.126485 |
| O  | -0.367251 | -1.574571 | -0.159896 |
| O  | 0.847789  | -1.019276 | -1.940408 |
| O  | 1.596038  | 1.705022  | -1.845317 |
| O  | 0.217990  | 2.986588  | -0.658082 |
| C  | 1.047398  | 4.094081  | -0.956997 |
| H  | 2.049116  | 3.957219  | -0.523605 |
| H  | 0.564330  | 4.967573  | -0.505415 |
| H  | 1.146298  | 4.238339  | -2.042005 |
| C  | -0.010018 | -2.928207 | -0.381936 |
| H  | -0.298258 | -3.257525 | -1.390043 |
| H  | -0.546645 | -3.512441 | 0.373571  |
| H  | 1.074226  | -3.062409 | -0.257815 |
| C  | -2.646470 | 0.172418  | 0.007278  |
| H  | -2.495108 | -0.906029 | -0.039729 |
| C  | -3.883879 | 0.696040  | 0.047869  |
| H  | -3.985985 | 1.785797  | 0.115994  |
| C  | -5.152862 | -0.048104 | 0.015172  |
| C  | -6.358634 | 0.660356  | 0.141133  |
| C  | -5.218479 | -1.444357 | -0.139432 |
| C  | -7.587018 | 0.002636  | 0.117989  |
| H  | -6.328540 | 1.746474  | 0.261977  |
| C  | -6.444203 | -2.101587 | -0.164070 |
| H  | -4.300626 | -2.025773 | -0.247284 |
| C  | -7.634841 | -1.382188 | -0.035207 |
| H  | -8.511838 | 0.574743  | 0.219577  |
| H  | -6.472903 | -3.186445 | -0.288217 |
| H  | -8.595522 | -1.901099 | -0.056402 |
| C  | 1.336889  | 1.049874  | 2.463961  |
| H  | 1.960520  | 1.218619  | 3.349683  |
| C  | 0.070140  | 1.142965  | 2.419698  |
| C  | -1.264327 | 1.180683  | 2.162870  |
| H  | -1.768761 | 2.150667  | 2.187304  |
| H  | -1.869232 | 0.327780  | 2.485254  |
| Na | 2.916599  | -0.094468 | -2.282150 |
| O  | 3.520158  | -0.490386 | -0.206313 |
| C  | 4.577516  | -1.258325 | 0.281346  |
| C  | 4.056101  | -2.342888 | 1.238445  |
| H  | 4.863038  | -2.989107 | 1.619959  |
| H  | 3.553677  | -1.873058 | 2.100542  |

|   |          |           |           |
|---|----------|-----------|-----------|
| H | 3.318874 | -2.976072 | 0.720638  |
| C | 5.580866 | -0.362567 | 1.025653  |
| H | 6.448274 | -0.926145 | 1.405693  |
| H | 5.946223 | 0.429359  | 0.353128  |
| H | 5.082238 | 0.123206  | 1.880753  |
| C | 5.277364 | -1.932374 | -0.909312 |
| H | 6.118505 | -2.569778 | -0.594216 |
| H | 4.559174 | -2.561462 | -1.459902 |
| H | 5.671556 | -1.170336 | -1.601638 |

54

Figure\_S6-1\_PA-NaOtBu-prod(1,4) / electronic energy: -2993.45855811 a.u. / lowest freq: 12.67 cm-1

|    |           |           |           |
|----|-----------|-----------|-----------|
| Cu | 1.967797  | -0.204010 | 0.840379  |
| C  | -0.996444 | -0.186244 | 1.064888  |
| C  | -0.026017 | 0.039421  | -0.111673 |
| H  | -1.007048 | 0.757627  | 1.622229  |
| C  | 0.200905  | -1.019323 | -1.081847 |
| C  | 0.114368  | 1.406512  | -0.595198 |
| O  | -0.333698 | -2.201898 | -0.699452 |
| O  | 0.821943  | -0.958542 | -2.139841 |
| O  | 0.665659  | 1.786780  | -1.624577 |
| O  | -0.427488 | 2.321398  | 0.236181  |
| C  | -0.282284 | 3.681291  | -0.125369 |
| H  | 0.778667  | 3.966393  | -0.179080 |
| H  | -0.783576 | 4.260046  | 0.658899  |
| H  | -0.751440 | 3.886177  | -1.098160 |
| C  | -0.077684 | -3.321245 | -1.526378 |
| H  | -0.502704 | -3.179302 | -2.530254 |
| H  | -0.556623 | -4.177517 | -1.037838 |
| H  | 1.002412  | -3.503209 | -1.623586 |
| C  | -2.404647 | -0.461943 | 0.610196  |
| H  | -2.555377 | -1.416832 | 0.095971  |
| C  | -3.422680 | 0.393754  | 0.768266  |
| H  | -3.226608 | 1.341948  | 1.282548  |
| C  | -4.813493 | 0.205677  | 0.311685  |
| C  | -5.769556 | 1.187427  | 0.615382  |
| C  | -5.234843 | -0.919408 | -0.418227 |
| C  | -7.097782 | 1.052457  | 0.213165  |
| H  | -5.462933 | 2.072832  | 1.179031  |
| C  | -6.559986 | -1.056373 | -0.820260 |
| H  | -4.516942 | -1.699363 | -0.680220 |
| C  | -7.499848 | -0.071883 | -0.506127 |
| H  | -7.822273 | 1.830430  | 0.464456  |
| H  | -6.863377 | -1.940315 | -1.386178 |
| H  | -8.539374 | -0.182542 | -0.822384 |
| C  | 2.101560  | -0.952704 | 2.748802  |
| H  | 2.992433  | -1.000777 | 3.357232  |
| C  | 0.933444  | -1.048457 | 2.348844  |
| C  | -0.495390 | -1.257042 | 2.056780  |
| H  | -1.076472 | -1.222585 | 2.992022  |
| H  | -0.611984 | -2.262710 | 1.628488  |
| Na | 2.476244  | 0.622318  | -2.338585 |
| O  | 3.360118  | 0.350457  | -0.331008 |
| C  | 4.717390  | 0.200585  | -0.059071 |
| C  | 5.048148  | -1.270210 | 0.244257  |
| H  | 6.124488  | -1.431212 | 0.417709  |
| H  | 4.501951  | -1.605138 | 1.140377  |
| H  | 4.732472  | -1.905186 | -0.598963 |
| C  | 5.119048  | 1.074989  | 1.139181  |
| H  | 6.191954  | 0.993482  | 1.377169  |
| H  | 4.887609  | 2.130764  | 0.927710  |
| H  | 4.542400  | 0.774633  | 2.028579  |
| C  | 5.512656  | 0.643837  | -1.299228 |
| H  | 6.601184  | 0.577920  | -1.145008 |
| H  | 5.258293  | 0.005743  | -2.162547 |
| H  | 5.264597  | 1.687212  | -1.553602 |

49

Figure\_S7-1\_Me2NHC-Cu-allyl / electronic energy: -2512.83406354 a.u. / lowest freq: 19.73 cm-1

|    |           |           |           |
|----|-----------|-----------|-----------|
| C  | -3.482876 | -2.154351 | 0.497924  |
| H  | -3.031361 | -3.105658 | 0.169087  |
| C  | -2.890517 | -1.648131 | 1.818672  |
| H  | -3.664022 | -1.323800 | 2.534491  |
| C  | -2.285225 | -0.188955 | 0.095336  |
| Cu | -1.299425 | 1.213859  | -0.808543 |
| N  | -3.125028 | -1.085167 | -0.432091 |
| N  | -2.094356 | -0.503054 | 1.383204  |
| H  | -2.257578 | -2.395107 | 2.320683  |
| H  | -4.573034 | -2.293576 | 0.540620  |
| C  | 0.093634  | 2.448930  | -1.440640 |
| H  | -0.161586 | 3.513200  | -1.565844 |
| H  | 0.491208  | 2.048089  | -2.387871 |
| C  | 0.991123  | 2.164253  | -0.292353 |
| C  | 1.122960  | 2.962609  | 0.801653  |
| H  | 1.742935  | 2.613981  | 1.634700  |
| C  | 0.405499  | 4.269536  | 0.963238  |
| H  | 0.654871  | 4.982764  | 0.157201  |
| H  | -0.691152 | 4.124336  | 0.904199  |
| H  | 0.630949  | 4.755112  | 1.923544  |
| B  | 1.659797  | 0.755181  | -0.229879 |
| O  | 2.270114  | 0.226920  | 0.883648  |

|   |           |           |           |
|---|-----------|-----------|-----------|
| O | 1.627375  | -0.148678 | -1.265630 |
| C | 2.852606  | -1.034292 | 0.517526  |
| C | 2.002671  | -1.431975 | -0.743358 |
| C | 2.762879  | -2.206364 | -1.808696 |
| H | 3.604863  | -1.625471 | -2.205723 |
| H | 3.149242  | -3.151373 | -1.397973 |
| H | 2.089282  | -2.446533 | -2.643924 |
| C | 0.709487  | -2.164766 | -0.380019 |
| H | 0.163542  | -1.638361 | 0.416038  |
| H | 0.058075  | -2.198111 | -1.265655 |
| H | 0.906321  | -3.195051 | -0.050819 |
| C | 2.737813  | -1.996580 | 1.690086  |
| H | 3.362946  | -1.643963 | 2.523077  |
| H | 1.703980  | -2.073857 | 2.050172  |
| H | 3.086497  | -2.999797 | 1.402493  |
| C | 4.323302  | -0.778601 | 0.188296  |
| H | 4.853801  | -1.713054 | -0.043494 |
| H | 4.427017  | -0.094369 | -0.666395 |
| C | 4.806657  | -0.312365 | 1.058680  |
| C | -3.487406 | -1.163884 | -1.824387 |
| H | -4.580734 | -1.221320 | -1.939862 |
| H | -3.120365 | -0.265679 | -2.336487 |
| H | -3.039560 | -2.052430 | -2.299717 |
| C | -1.295324 | 0.241755  | 2.325129  |
| H | -0.571169 | -0.422818 | 2.822224  |
| H | -0.737917 | 1.024815  | 1.793283  |
| H | -1.927347 | 0.709105  | 3.098033  |

81

Figure\_S7-1\_AA-Me2NHC-pc(1,6major) / electronic energy: -3354.79756035 a.u. / lowest freq: 11.94 cm-1

|    |           |           |           |
|----|-----------|-----------|-----------|
| C  | 5.170756  | 1.188874  | -1.531180 |
| H  | 5.892606  | 1.295312  | -0.704546 |
| C  | 5.212640  | -0.205047 | -2.169969 |
| H  | 5.219996  | -0.165310 | -3.272253 |
| C  | 3.170143  | 0.077897  | -1.078579 |
| Cu | 1.322807  | -0.211888 | -0.407027 |
| N  | 3.804090  | 1.250799  | -1.015916 |
| N  | 3.961985  | -0.798942 | -1.698661 |
| C  | 0.111070  | -0.589852 | 1.176798  |
| C  | 1.480040  | -0.723122 | 1.575136  |
| H  | 6.078189  | -0.800690 | -1.845233 |
| H  | 5.356686  | 1.997929  | -2.252678 |
| H  | -0.327074 | 0.387743  | 1.396680  |
| C  | 2.179647  | -2.031485 | 1.636725  |
| C  | 2.169658  | 0.405908  | 2.248180  |
| O  | 1.773480  | -2.863816 | 0.654934  |
| O  | 3.013062  | -2.363579 | 2.442484  |
| O  | 3.353636  | 0.475894  | 2.484777  |
| O  | 1.324764  | 1.405484  | 2.560603  |
| C  | 1.884803  | 2.541038  | 3.195755  |
| H  | 2.472766  | 2.248756  | 4.076580  |
| H  | 1.040898  | 3.170694  | 3.498441  |
| H  | 2.534815  | 3.099867  | 2.506698  |
| C  | 2.333746  | -4.167155 | 0.650129  |
| H  | 3.424542  | -4.122198 | 0.522667  |
| H  | 1.877079  | -4.691327 | -0.196665 |
| H  | 2.107900  | -4.694187 | 1.587798  |
| C  | 0.213058  | 0.294427  | -2.003905 |
| H  | 0.526075  | -0.430570 | -2.773130 |
| H  | 0.665438  | 1.274698  | -2.222942 |
| C  | -1.233489 | 0.371824  | -1.787283 |
| C  | -2.081332 | -0.667774 | -2.004322 |
| H  | -3.144870 | -0.531488 | -1.788655 |
| C  | -1.635538 | -2.009130 | -2.498992 |
| H  | -1.204882 | -1.956225 | -3.514824 |
| H  | -0.836365 | -2.406738 | -1.844538 |
| H  | -2.457336 | -2.738785 | -2.514159 |
| C  | -0.856737 | -1.643667 | 0.952305  |
| H  | -0.485241 | -2.665109 | 0.866396  |
| C  | -2.172284 | -1.375228 | 0.800869  |
| H  | -2.505688 | -0.336675 | 0.884294  |
| C  | -3.240077 | -2.351046 | 0.546852  |
| C  | -4.561390 | -1.888590 | 0.424854  |
| C  | -3.006909 | -3.728769 | 0.396639  |
| C  | -5.610706 | -2.765022 | 0.159817  |
| H  | -4.756649 | -0.817741 | 0.526295  |
| C  | -4.055181 | -4.605969 | 0.132791  |
| H  | -1.992693 | -4.124331 | 0.480858  |
| C  | -5.362490 | -4.129833 | 0.011594  |
| H  | -6.628129 | -2.378794 | 0.063782  |
| H  | -3.850653 | -5.672804 | 0.016432  |
| H  | -6.181860 | -4.820621 | -0.199041 |
| B  | -1.807057 | 1.646641  | -1.107380 |
| O  | -3.076939 | 1.745232  | -0.587785 |
| O  | -1.079768 | 2.792564  | -0.892924 |
| C  | -3.294971 | 3.108893  | -0.192441 |
| C  | -1.825029 | 3.636000  | 0.000865  |
| C  | -1.612410 | 5.090469  | -0.389962 |
| H  | -1.838526 | 5.261321  | -1.449912 |
| H  | -2.248002 | 5.750962  | 0.218386  |

|   |           |           |           |
|---|-----------|-----------|-----------|
| H | -0.563339 | 5.370211  | -0.215737 |
| C | -1.278164 | 3.387356  | 1.405723  |
| H | -1.438247 | 2.346628  | 1.722332  |
| H | -0.195350 | 3.572933  | 1.397963  |
| H | -1.742199 | 4.053246  | 2.146960  |
| C | -4.147681 | 3.129920  | 1.067209  |
| H | -5.153396 | 2.747352  | 0.840841  |
| H | -3.716560 | 2.502769  | 1.857905  |
| H | -4.251075 | 4.156435  | 1.449485  |
| C | -4.031367 | 3.801307  | -1.339090 |
| H | -4.279956 | 4.842628  | -1.089828 |
| H | -3.431079 | 3.796144  | -2.260750 |
| H | -4.967249 | 3.260693  | -1.540172 |
| C | 3.313914  | 2.426406  | -0.342866 |
| H | 3.420637  | 3.311284  | -0.988437 |
| H | 2.248024  | 2.291809  | -0.114042 |
| H | 3.862265  | 2.602068  | 0.596546  |
| C | 3.580443  | -2.132538 | -2.087546 |
| H | 4.310468  | -2.869925 | -1.719117 |
| H | 2.598290  | -2.359289 | -1.656356 |
| H | 3.520252  | -2.220880 | -3.184946 |

81

Figure\_S7-1\_AA-Me2NHC-ts(1,6major) / electronic energy: -3354.79031886 a.u. / lowest freq: -403.73 cm-1

|    |           |           |           |
|----|-----------|-----------|-----------|
| C  | 5.146740  | 0.915997  | -1.482397 |
| H  | 5.839347  | 0.967818  | -0.625786 |
| C  | 5.131152  | -0.469708 | -2.138883 |
| H  | 5.156926  | -0.415473 | -3.240450 |
| C  | 3.080147  | -0.091943 | -1.096490 |
| Cu | 1.241206  | -0.313784 | -0.397441 |
| N  | 3.766626  | 1.050757  | -1.018256 |
| N  | 3.845842  | -1.006712 | -1.693539 |
| C  | -0.012473 | -0.690668 | 1.225525  |
| C  | 1.364155  | -0.828191 | 1.635108  |
| H  | 5.961127  | -1.111331 | -1.809743 |
| H  | 5.409008  | 1.721445  | -2.183416 |
| H  | -0.434885 | 0.297027  | 1.433892  |
| C  | 2.082068  | -2.117354 | 1.662544  |
| C  | 2.041868  | 0.302841  | 2.295739  |
| O  | 1.607000  | -2.983247 | 0.734313  |
| O  | 2.993711  | -2.429960 | 2.391904  |
| O  | 3.225695  | 0.391073  | 2.539582  |
| O  | 1.194713  | 1.314670  | 2.593710  |
| C  | 1.765770  | 2.457696  | 3.201664  |
| H  | 2.330108  | 2.184195  | 4.104020  |
| H  | 0.930727  | 3.115986  | 3.466213  |
| H  | 2.442491  | 2.980822  | 2.509749  |
| C  | 2.190347  | -4.273889 | 0.714438  |
| H  | 3.269946  | -4.214640 | 0.515671  |
| H  | 1.689379  | -4.823443 | -0.090844 |
| H  | 2.037530  | -4.789353 | 1.673411  |
| C  | 0.146705  | 0.241826  | -2.059329 |
| H  | 0.415950  | -0.572185 | -2.745664 |
| H  | 0.702043  | 1.167908  | -2.251578 |
| C  | -1.208886 | 0.392782  | -1.673364 |
| C  | -2.131961 | -0.656741 | -1.689612 |
| H  | -3.186617 | -0.385618 | -1.601080 |
| C  | -1.810236 | -1.952095 | -2.375479 |
| H  | -1.586741 | -1.796405 | -3.445617 |
| H  | -0.913693 | -2.416147 | -1.926196 |
| H  | -2.636863 | -2.671903 | -2.304231 |
| C  | -0.953954 | -1.661101 | 0.828582  |
| H  | -0.634242 | -2.697144 | 0.724001  |
| C  | -2.244522 | -1.283840 | 0.470746  |
| H  | -2.552866 | -0.269230 | 0.733961  |
| C  | -3.367939 | -2.235304 | 0.342944  |
| C  | -4.681170 | -1.736073 | 0.326070  |
| C  | -3.192060 | -3.623692 | 0.225955  |
| C  | -5.776638 | -2.586222 | 0.196977  |
| H  | -4.836983 | -0.657073 | 0.413151  |
| C  | -4.286658 | -4.475778 | 0.095322  |
| H  | -2.186389 | -4.048415 | 0.231428  |
| C  | -5.584840 | -3.963350 | 0.079154  |
| H  | -6.786796 | -2.170022 | 0.188075  |
| H  | -4.123628 | -5.552202 | 0.003350  |
| H  | -6.440785 | -4.634162 | -0.022626 |
| B  | -1.630938 | 1.753702  | -1.046830 |
| O  | -2.765246 | 1.930627  | -0.296194 |
| O  | -0.887584 | 2.902255  | -1.140466 |
| C  | -2.908531 | 3.337381  | -0.028687 |
| C  | -1.436377 | 3.862525  | -0.219990 |
| C  | -1.329120 | 5.252583  | -0.827238 |
| H  | -1.794723 | 5.299531  | -1.819528 |
| H  | -1.811900 | 5.996133  | -0.175812 |
| H  | -0.269933 | 5.527330  | -0.933950 |
| C  | -0.601288 | 3.779545  | 1.055940  |
| H  | -0.652198 | 2.777263  | 1.504808  |
| H  | 0.450835  | 3.980945  | 0.807263  |
| H  | -0.925451 | 4.518114  | 1.802666  |
| C  | -3.471231 | 3.518927  | 1.372428  |

|   |           |           |           |
|---|-----------|-----------|-----------|
| H | -4.493042 | 3.115388  | 1.416336  |
| H | -2.865656 | 2.993309  | 2.121559  |
| H | -3.513200 | 4.586143  | 1.636474  |
| C | -3.883072 | 3.894091  | -1.065775 |
| H | -4.086374 | 4.960620  | -0.895357 |
| H | -3.493355 | 3.769712  | -2.086653 |
| H | -4.832764 | 3.345107  | -0.994114 |
| C | 3.327173  | 2.234766  | -0.323556 |
| H | 3.504781  | 3.129924  | -0.938332 |
| H | 2.249297  | 2.155720  | -0.126648 |
| H | 3.854111  | 2.347667  | 0.637415  |
| C | 3.413428  | -2.324679 | -2.082729 |
| H | 4.126033  | -3.085349 | -1.728664 |
| H | 2.433248  | -2.521961 | -1.631959 |
| H | 3.330724  | -2.408464 | -3.179121 |

81

Figure\_S7-1\_AA-Me2NHC-prod(1,6major) / electronic energy: -3354.84618081 a.u. / lowest freq: 21.17 cm-1

|    |           |           |           |
|----|-----------|-----------|-----------|
| C  | -4.748833 | -0.770351 | -0.821798 |
| H  | -5.064742 | -0.474129 | 0.192830  |
| C  | -4.786780 | 0.396826  | -1.809043 |
| H  | -5.132360 | 0.093782  | -2.812965 |
| C  | -2.567185 | -0.128783 | -1.317654 |
| Cu | -0.601813 | 0.040249  | -1.178469 |
| N  | -3.322597 | -1.093774 | -0.792621 |
| N  | -3.379807 | 0.788791  | -1.858961 |
| C  | -0.090848 | 0.390534  | 1.240805  |
| C  | -1.312517 | 0.071242  | 1.919940  |
| H  | -5.420416 | 1.229592  | -1.470481 |
| H  | -5.347154 | -1.633267 | -1.145787 |
| H  | 0.726181  | -0.284000 | 1.518300  |
| C  | -2.548501 | 0.811973  | 1.756327  |
| C  | -1.336207 | -1.082574 | 2.799724  |
| O  | -2.366790 | 1.972487  | 1.062930  |
| O  | -3.665133 | 0.516599  | 2.146609  |
| O  | -2.288362 | -1.545600 | 3.401738  |
| O  | -0.112932 | -1.688131 | 2.926576  |
| C  | -0.071657 | -2.837598 | 3.743266  |
| H  | -0.330621 | -2.600748 | 4.786023  |
| H  | 0.957467  | -3.214869 | 3.696750  |
| H  | -0.765819 | -3.611515 | 3.382675  |
| C  | -3.509234 | 2.772370  | 0.861947  |
| H  | -4.293962 | 2.225467  | 0.319290  |
| H  | -3.181627 | 3.634960  | 0.268501  |
| H  | -3.931387 | 3.120231  | 1.816673  |
| C  | 0.439944  | -0.148901 | -3.044105 |
| H  | 0.111860  | 0.679553  | -3.679344 |
| H  | 0.176498  | -1.151423 | -3.392094 |
| C  | 1.331966  | 0.015049  | -2.008844 |
| C  | 1.930661  | 1.362314  | -1.603414 |
| H  | 3.016153  | 1.287389  | -1.793149 |
| C  | 1.403555  | 2.549679  | -2.403124 |
| H  | 1.572411  | 2.419355  | -3.481849 |
| H  | 0.323325  | 2.700440  | -2.244465 |
| H  | 1.911947  | 3.473350  | -2.093893 |
| C  | 0.275003  | 1.355696  | 0.321622  |
| H  | -0.430131 | 2.151735  | 0.074371  |
| C  | 1.729930  | 1.543509  | -0.067153 |
| H  | 2.296816  | 0.728543  | 0.405418  |
| C  | 2.351913  | 2.837262  | 0.441322  |
| C  | 3.732787  | 3.038907  | 0.292084  |
| C  | 1.606276  | 3.844227  | 1.062740  |
| C  | 4.344347  | 4.209757  | 0.732580  |
| H  | 4.342270  | 2.258888  | -0.172993 |
| C  | 2.215140  | 5.020065  | 1.507636  |
| H  | 0.534437  | 3.707127  | 1.215336  |
| C  | 3.584746  | 5.211055  | 1.341175  |
| H  | 5.421425  | 4.341003  | 0.604347  |
| H  | 1.609984  | 5.790519  | 1.991527  |
| H  | 4.060975  | 6.130201  | 1.689710  |
| B  | 1.842540  | -1.305311 | -1.323258 |
| O  | 2.787244  | -1.355765 | -0.343009 |
| O  | 1.343289  | -2.535973 | -1.645472 |
| C  | 3.080332  | -2.741122 | -0.066089 |
| C  | 1.821000  | -3.480447 | -0.665139 |
| C  | 2.129786  | -4.798409 | -1.357699 |
| H  | 2.828870  | -4.668152 | -2.193052 |
| H  | 2.563796  | -5.513409 | -0.643242 |
| H  | 1.201118  | -5.233508 | -1.753589 |
| C  | 0.696938  | -3.671437 | 0.349480  |
| H  | 0.441568  | -2.729599 | 0.855835  |
| H  | -0.196473 | -4.039417 | -0.174774 |
| H  | 0.969598  | -4.409896 | 1.116094  |
| C  | 3.252663  | -2.904626 | 1.435995  |
| H  | 4.154051  | -2.369216 | 1.766251  |
| H  | 2.392961  | -2.493944 | 1.980544  |
| H  | 3.369506  | -3.966322 | 1.698733  |
| C  | 4.380698  | -3.071518 | -0.794794 |
| H  | 4.702996  | -4.102445 | -0.592849 |
| H  | 4.274103  | -2.943304 | -1.881707 |



|   |           |           |           |
|---|-----------|-----------|-----------|
| H | 5.167471  | -2.387512 | -0.446585 |
| C | -2.847020 | -2.203650 | -0.005034 |
| H | -3.263405 | -3.148797 | -0.386756 |
| H | -1.753567 | -2.244637 | -0.071620 |
| H | -3.130534 | -2.078663 | 1.051543  |
| C | -2.954961 | 1.938119  | -2.612697 |
| H | -3.486279 | 2.839647  | -2.271568 |
| H | -1.879605 | 2.089958  | -2.459092 |
| H | -3.145178 | 1.807318  | -3.691234 |

49

Figure\_S7-1\_Me2NHC-Cu-allyl / electronic energy: -2512.83406354 a.u. / lowest freq: 19.73 cm-1

|    |           |           |           |
|----|-----------|-----------|-----------|
| C  | -3.482876 | -2.154351 | 0.497924  |
| H  | -3.031361 | -3.105658 | 0.169087  |
| C  | -2.890517 | -1.648131 | 1.818672  |
| H  | -3.664022 | -1.323800 | 2.534491  |
| C  | -2.285225 | -0.188955 | 0.095336  |
| Cu | -1.299425 | 1.213859  | -0.808543 |
| N  | -3.125028 | -1.085167 | -0.432091 |
| N  | -2.094356 | -0.503054 | 1.383204  |
| H  | -2.257578 | -2.395107 | 2.320683  |
| H  | -4.573034 | -2.293576 | 0.540620  |
| C  | 0.093634  | 2.448930  | -1.440640 |
| H  | -0.161586 | 3.513200  | -1.565844 |
| H  | 0.491208  | 2.048089  | -2.387871 |
| C  | 0.991123  | 2.164253  | -0.292353 |
| C  | 1.122960  | 2.962609  | 0.801653  |
| H  | 1.742935  | 2.613981  | 1.634700  |
| C  | 0.405499  | 4.269536  | 0.963238  |
| H  | 0.654871  | 4.982764  | 0.157201  |
| H  | -0.691152 | 4.124336  | 0.904199  |
| H  | 0.630949  | 4.755112  | 1.923544  |
| B  | 1.659797  | 0.755181  | -0.229879 |
| O  | 2.270114  | 0.226920  | 0.883648  |
| O  | 1.627375  | -0.148678 | -1.265630 |
| C  | 2.852606  | -1.034292 | 0.517526  |
| C  | 2.002671  | -1.431975 | -0.743358 |
| C  | 2.762879  | -2.206364 | -1.808696 |
| H  | 3.604863  | -1.625471 | -2.205723 |
| H  | 3.149242  | -3.151373 | -1.397973 |
| H  | 2.089282  | -2.446533 | -2.643924 |
| C  | 0.709487  | -2.164766 | -0.380019 |
| H  | 0.163542  | -1.638361 | 0.416038  |
| H  | 0.058075  | -2.198111 | -1.265655 |
| H  | 0.906321  | -3.195051 | -0.050819 |
| C  | 2.737813  | -1.996580 | 1.690086  |
| H  | 3.362946  | -1.643963 | 2.523077  |
| H  | 1.703980  | -2.073857 | 2.050172  |
| H  | 3.086497  | -2.999797 | 1.402493  |
| C  | 4.323302  | -0.778601 | 0.188296  |
| H  | 4.853801  | -1.713054 | -0.043494 |
| H  | 4.427017  | -0.094369 | -0.666395 |
| H  | 4.806657  | -0.312365 | 1.058680  |
| C  | -3.487406 | -1.163884 | -1.824387 |
| H  | -4.580734 | -1.221320 | -1.939862 |
| H  | -3.120365 | -0.265679 | -2.336487 |
| H  | -3.039560 | -2.052430 | -2.299717 |
| C  | -1.295324 | 0.241755  | 2.325129  |
| H  | -0.571169 | -0.422818 | 2.822224  |
| H  | -0.737917 | 1.024815  | 1.793283  |
| H  | -1.927347 | 0.709105  | 3.098033  |

81

Figure\_S7-1\_AA-Me2NHC-pc(1,6minor) / electronic energy: -3354.79657990 a.u. / lowest freq: 25.23 cm-1

|   |          |           |           |
|---|----------|-----------|-----------|
| H | 4.534853 | 3.537635  | -1.622966 |
| H | 2.269243 | 4.015018  | -1.716426 |
| H | 5.649275 | 2.283394  | -1.033391 |
| C | 0.893992 | 0.243336  | -2.211221 |
| O | 3.157413 | 1.289545  | -1.451504 |
| C | 4.794906 | 2.917458  | -0.755516 |
| B | 1.796497 | 1.158627  | -1.335716 |
| C | 2.161458 | 4.151645  | -0.630538 |
| H | 2.890623 | 4.904300  | -0.298742 |
| H | 5.111552 | 3.576005  | 0.067156  |
| C | 3.629986 | 2.042308  | -0.320623 |
| H | 1.150987 | 4.538078  | -0.434325 |
| O | 1.293695 | 1.949950  | -0.328123 |
| C | 2.339468 | 2.828454  | 0.114233  |
| H | 4.826140 | 0.354433  | 0.289734  |
| C | 4.086477 | 1.036889  | 0.732432  |
| H | 3.245214 | 0.423343  | 1.082155  |
| H | 4.543894 | 1.534660  | 1.599434  |
| C | 2.205879 | 3.051219  | 1.613005  |
| H | 3.047645 | 3.649224  | 1.992502  |
| H | 1.275525 | 3.597603  | 1.827206  |
| H | 2.179784 | 2.099477  | 2.158183  |
| H | 2.570547 | -0.897012 | -2.785793 |
| C | 1.482411 | -0.796300 | -2.851046 |
| C | 0.731441 | -1.847112 | -3.614898 |
| H | 1.377900 | -2.687586 | -3.906233 |
| H | 0.276427 | -1.442310 | -4.536707 |

|    |           |           |           |
|----|-----------|-----------|-----------|
| H  | -0.104275 | -2.248698 | -3.013882 |
| C  | -0.556418 | 0.489100  | -2.179745 |
| H  | -1.107554 | 0.027554  | -3.017068 |
| H  | -0.785465 | 1.565837  | -2.150906 |
| C  | -5.128541 | 2.202209  | -0.403626 |
| H  | -5.920514 | 1.861679  | 0.282675  |
| C  | -4.137214 | 3.161057  | 0.268597  |
| H  | -3.986519 | 4.090915  | -0.303946 |
| C  | -3.019140 | 1.198981  | -0.329410 |
| Cu | -1.546887 | -0.126039 | -0.544941 |
| N  | -4.270513 | 1.079922  | -0.779197 |
| N  | -2.903595 | 2.376290  | 0.288656  |
| C  | -0.703045 | -1.848511 | 0.095212  |
| C  | -1.847327 | -1.544816 | 0.902255  |
| H  | -4.437386 | 3.438902  | 1.290247  |
| H  | -5.612322 | 2.637010  | -1.291446 |
| H  | -0.890920 | -2.564440 | -0.708915 |
| C  | -1.728839 | -0.892901 | 2.234071  |
| C  | -3.154286 | -2.179467 | 0.608589  |
| O  | -0.822139 | 0.102961  | 2.219412  |
| O  | -2.338773 | -1.183423 | 3.232464  |
| O  | -4.186533 | -1.995493 | 1.211044  |
| O  | -3.095170 | -2.990857 | -0.465060 |
| C  | -4.289391 | -3.663653 | -0.825314 |
| H  | -4.656046 | -4.282443 | 0.005630  |
| H  | -4.035847 | -4.297206 | -1.682221 |
| H  | -5.077080 | -2.951305 | -1.107859 |
| C  | -0.581713 | 0.766506  | 3.448826  |
| H  | -1.503393 | 1.228336  | 3.830266  |
| H  | 0.165793  | 1.537840  | 3.236337  |
| H  | -0.198564 | 0.065216  | 4.203940  |
| C  | 0.686160  | -1.770003 | 0.520020  |
| H  | 0.915694  | -1.174545 | 1.406137  |
| C  | 1.684035  | -2.383617 | -0.146442 |
| H  | 1.446237  | -2.932006 | -1.062822 |
| C  | 3.097778  | -2.386379 | 0.262609  |
| C  | 4.105254  | -2.540900 | -0.702779 |
| C  | 3.483423  | -2.248133 | 1.606289  |
| C  | 5.451318  | -2.521271 | -0.344698 |
| H  | 3.824479  | -2.664706 | -1.751599 |
| C  | 4.828251  | -2.231721 | 1.966151  |
| H  | 2.717977  | -2.163405 | 2.381099  |
| C  | 5.819066  | -2.361738 | 0.991940  |
| H  | 6.218511  | -2.630828 | -1.114511 |
| H  | 5.104982  | -2.121532 | 3.017154  |
| H  | 6.874124  | -2.347853 | 1.274168  |
| C  | -4.806961 | -0.053238 | -1.485829 |
| H  | -3.989369 | -0.743135 | -1.731989 |
| H  | -5.549490 | -0.587514 | -0.872170 |
| H  | -5.286960 | 0.268980  | -2.423088 |
| C  | -1.687101 | 2.934647  | 0.823762  |
| H  | -0.844332 | 2.266282  | 0.608561  |
| H  | -1.481845 | 3.910871  | 0.354379  |
| H  | -1.769427 | 3.086660  | 1.911990  |

81

Figure\_S7-1\_AA-Me2NHC-ts(1,6minor) / electronic energy: -3354.78177396 a.u. / lowest freq: -454.83 cm-1

|   |           |           |           |
|---|-----------|-----------|-----------|
| H | 4.969168  | 2.906226  | -1.220530 |
| H | 3.028697  | 3.515922  | -2.290741 |
| H | 5.542754  | 1.949949  | 0.163293  |
| C | 1.031409  | 0.050570  | -1.848484 |
| O | 3.120423  | 1.093828  | -0.701498 |
| C | 4.818096  | 2.714624  | -0.150847 |
| B | 1.806352  | 1.161996  | -1.075236 |
| C | 2.637426  | 4.116117  | -1.456499 |
| H | 3.391031  | 4.867350  | -1.181861 |
| H | 5.030655  | 3.639047  | 0.406512  |
| C | 3.406408  | 2.228286  | 0.137754  |
| H | 1.736671  | 4.639850  | -1.806945 |
| O | 1.223460  | 2.348246  | -0.702323 |
| C | 2.265309  | 3.235491  | -0.263804 |
| H | 4.028960  | 0.959346  | 1.759083  |
| C | 3.299111  | 1.761510  | 1.588021  |
| H | 2.296015  | 1.362946  | 1.800181  |
| H | 3.512970  | 2.577278  | 2.292449  |
| C | 1.742308  | 4.095251  | 0.876510  |
| H | 2.550416  | 4.710266  | 1.299376  |
| H | 0.959835  | 4.771876  | 0.504065  |
| H | 1.309724  | 3.484608  | 1.679201  |
| H | 2.770242  | -1.138790 | -2.062194 |
| C | 1.679792  | -1.163937 | -2.117749 |
| C | 1.074807  | -2.151678 | -3.079218 |
| H | 1.692895  | -3.055260 | -3.183911 |
| H | 0.955546  | -1.708788 | -4.083563 |
| H | 0.069841  | -2.467522 | -2.749946 |
| C | -0.323430 | 0.308566  | -2.140174 |
| H | -0.846091 | -0.316045 | -2.877987 |
| H | -0.629457 | 1.358822  | -2.151915 |
| C | -5.014280 | 2.092417  | -1.024360 |
| H | -5.978857 | 1.851379  | -0.553935 |

|    |           |           |           |
|----|-----------|-----------|-----------|
| C  | -4.173463 | 3.070750  | -0.194627 |
| H  | -4.042493 | 4.047762  | -0.683307 |
| C  | -2.939612 | 1.122223  | -0.558914 |
| Cu | -1.471554 | -0.214325 | -0.466804 |
| N  | -4.152367 | 0.912814  | -1.077634 |
| N  | -2.895241 | 2.369506  | -0.085525 |
| C  | -0.724219 | -2.023284 | 0.363821  |
| C  | -1.863500 | -1.560123 | 1.125199  |
| H  | -4.597076 | 3.246035  | 0.807966  |
| H  | -5.215047 | 2.463133  | -2.043336 |
| H  | -0.980708 | -2.761880 | -0.401682 |
| C  | -1.741637 | -0.690925 | 2.308029  |
| C  | -3.182499 | -2.164081 | 0.885696  |
| O  | -0.678509 | 0.151701  | 2.207189  |
| O  | -2.463605 | -0.655154 | 3.276527  |
| O  | -4.227692 | -1.876578 | 1.427889  |
| O  | -3.147681 | -3.106971 | -0.090504 |
| C  | -4.369089 | -3.755695 | -0.386011 |
| H  | -4.775649 | -4.258017 | 0.503535  |
| H  | -4.143611 | -4.495794 | -1.162234 |
| H  | -5.121524 | -3.044541 | -0.756693 |
| C  | -0.444419 | 1.006081  | 3.310199  |
| H  | -1.327471 | 1.622798  | 3.529013  |
| H  | 0.398895  | 1.647372  | 3.029490  |
| H  | -0.189270 | 0.428682  | 4.210864  |
| C  | 0.646475  | -1.862349 | 0.597432  |
| H  | 0.964219  | -1.190138 | 1.394612  |
| C  | 1.598969  | -2.396605 | -0.272769 |
| H  | 1.250798  | -3.207874 | -0.916539 |
| C  | 3.037980  | -2.484566 | 0.065396  |
| C  | 3.877617  | -3.299285 | -0.712199 |
| C  | 3.614029  | -1.788627 | 1.137710  |
| C  | 5.239351  | -3.404419 | -0.440487 |
| H  | 3.450597  | -3.856417 | -1.550735 |
| C  | 4.975351  | -1.892600 | 1.413810  |
| H  | 2.991537  | -1.154124 | 1.768796  |
| C  | 5.797918  | -2.697959 | 0.625290  |
| H  | 5.868466  | -4.044005 | -1.064033 |
| H  | 5.398207  | -1.340622 | 2.257023  |
| H  | 6.865214  | -2.779065 | 0.842360  |
| C  | -4.577199 | -0.281198 | -1.759614 |
| H  | -3.787384 | -1.039717 | -1.683903 |
| H  | -5.495816 | -0.681682 | -1.303868 |
| H  | -4.773411 | -0.080105 | -2.825732 |
| C  | -1.777080 | 2.973405  | 0.592980  |
| H  | -0.892269 | 2.335075  | 0.481749  |
| H  | -1.549397 | 3.954054  | 0.147145  |
| H  | -1.993970 | 3.121447  | 1.663684  |

81

Figure\_S7-1\_AA-Me2NHC-prod(1,6minor) / electronic energy: -3354.83876879 a.u. / lowest freq: 20.29 cm-1

|    |           |           |           |
|----|-----------|-----------|-----------|
| H  | -5.443728 | -2.159872 | -0.784545 |
| H  | -3.773335 | -3.292443 | -1.864949 |
| H  | -5.705650 | -0.909352 | 0.452639  |
| C  | -1.201085 | -0.134941 | -2.166192 |
| O  | -3.281466 | -0.633151 | -0.714627 |
| C  | -5.154046 | -1.831575 | 0.221484  |
| B  | -2.057288 | -0.999038 | -1.176703 |
| C  | -3.389201 | -3.800975 | -0.968755 |
| H  | -4.217026 | -4.346813 | -0.495059 |
| H  | -5.456236 | -2.602275 | 0.945683  |
| C  | -3.660565 | -1.566790 | 0.320463  |
| H  | -2.631516 | -4.530211 | -1.288451 |
| O  | -1.635931 | -2.207242 | -0.694881 |
| C  | -2.746835 | -2.812214 | 0.001518  |
| H  | -3.857293 | 0.060678  | 1.712753  |
| C  | -3.330364 | -0.901297 | 1.652762  |
| H  | -2.254615 | -0.694357 | 1.738435  |
| H  | -3.638079 | -1.527021 | 2.502409  |
| C  | -2.215873 | -3.539257 | 1.226031  |
| H  | -3.044747 | -3.927543 | 1.835886  |
| H  | -1.594314 | -4.390126 | 0.912135  |
| H  | -1.599534 | -2.879125 | 1.848187  |
| H  | -2.523025 | 1.493466  | -2.323888 |
| C  | -1.438199 | 1.371947  | -2.177573 |
| C  | -0.730464 | 2.099448  | -3.317962 |
| H  | -0.988806 | 3.168736  | -3.303343 |
| H  | -1.012462 | 1.697766  | -4.302270 |
| H  | 0.365930  | 2.025230  | -3.218516 |
| C  | -0.426772 | -0.814343 | -3.080108 |
| H  | 0.080422  | -0.314114 | -3.911145 |
| H  | -0.449558 | -1.906836 | -3.124228 |
| C  | 4.786151  | -1.173875 | -0.733983 |
| H  | 5.384323  | -0.387850 | -0.250193 |
| C  | 4.132971  | -2.106611 | 0.292335  |
| H  | 4.542448  | -3.127228 | 0.273509  |
| C  | 2.468883  | -1.146157 | -1.025499 |
| Cu | 0.686449  | -0.379197 | -1.320767 |
| N  | 3.623792  | -0.593220 | -1.404442 |
| N  | 2.729017  | -2.092190 | -0.122337 |

|   |           |           |           |
|---|-----------|-----------|-----------|
| C | 1.145243  | 1.426423  | 0.376895  |
| C | 2.091943  | 0.918163  | 1.324416  |
| H | 4.205091  | -1.701709 | 1.314995  |
| H | 5.421783  | -1.706081 | -1.461632 |
| H | 1.551022  | 2.255719  | -0.212015 |
| C | 1.786546  | -0.066977 | 2.340295  |
| C | 3.470318  | 1.369615  | 1.222261  |
| O | 0.446295  | -0.327322 | 2.443401  |
| O | 2.557136  | -0.642287 | 3.089980  |
| O | 4.447765  | 0.950483  | 1.817230  |
| O | 3.626969  | 2.395097  | 0.328909  |
| C | 4.924922  | 2.933973  | 0.214156  |
| H | 5.285837  | 3.329087  | 1.175659  |
| H | 4.857294  | 3.748017  | -0.517971 |
| H | 5.648343  | 2.182883  | -0.139659 |
| C | 0.059715  | -1.176003 | 3.503201  |
| H | 0.386589  | -2.213688 | 3.333414  |
| H | -1.035535 | -1.141844 | 3.545574  |
| H | 0.477545  | -0.837365 | 4.461720  |
| C | -0.154318 | 1.083117  | 0.049500  |
| H | -0.666310 | 0.349283  | 0.675624  |
| C | -1.033980 | 1.999326  | -0.793271 |
| H | -0.415026 | 2.879698  | -1.038805 |
| C | -2.211777 | 2.557224  | 0.007386  |
| C | -3.257124 | 3.240374  | -0.631671 |
| C | -2.254265 | 2.465672  | 1.403913  |
| C | -4.316718 | 3.784822  | 0.090904  |
| H | -3.247912 | 3.360446  | -1.717807 |
| C | -3.313157 | 3.009177  | 2.132623  |
| H | -1.449838 | 1.954269  | 1.935388  |
| C | -4.354564 | 3.665690  | 1.480669  |
| H | -5.118554 | 4.307293  | -0.436397 |
| H | -3.321858 | 2.912582  | 3.221049  |
| H | -5.186468 | 4.087644  | 2.048942  |
| C | 3.768643  | 0.438899  | -2.396639 |
| H | 2.785905  | 0.652252  | -2.836542 |
| H | 4.160767  | 1.364060  | -1.949393 |
| H | 4.450208  | 0.114034  | -3.199269 |
| C | 1.749338  | -2.886230 | 0.576130  |
| H | 0.739780  | -2.603779 | 0.247925  |
| H | 1.901745  | -3.958960 | 0.375120  |
| H | 1.837792  | -2.719171 | 1.660417  |

32

Figure\_S8-1\_dienoate / electronic energy: -841.927078481 a.u. / lowest freq: 24.55 cm-1

|   |           |           |           |
|---|-----------|-----------|-----------|
| C | -0.660544 | -0.726572 | 0.059153  |
| C | -1.860539 | -0.097447 | 0.115996  |
| H | -0.691600 | -1.818492 | -0.004770 |
| C | -1.976243 | 1.390665  | 0.160143  |
| C | -3.120576 | -0.891785 | 0.187355  |
| O | -3.041424 | 1.823605  | -0.507466 |
| O | -1.182749 | 2.134043  | 0.689285  |
| O | -4.147702 | -0.497504 | 0.683440  |
| O | -2.981802 | -2.118850 | -0.320932 |
| C | -4.097604 | -2.989729 | -0.195724 |
| H | -4.332384 | -3.170881 | 0.862818  |
| H | -3.810049 | -3.927003 | -0.683244 |
| H | -4.981752 | -2.562067 | -0.688186 |
| C | -3.254671 | 3.228152  | -0.535442 |
| H | -3.354009 | 3.627502  | 0.483524  |
| H | -4.184056 | 3.384216  | -1.092621 |
| H | -2.420438 | 3.737793  | -1.038016 |
| C | 0.656646  | -0.129211 | 0.062308  |
| H | 0.725624  | 0.955889  | 0.150505  |
| C | 1.759981  | -0.902956 | -0.019704 |
| H | 1.621029  | -1.988149 | -0.089650 |
| C | 3.156351  | -0.453635 | -0.025165 |
| C | 4.175093  | -1.416830 | -0.109525 |
| C | 3.522207  | 0.902114  | 0.053056  |
| C | 5.517020  | -1.042840 | -0.114390 |
| H | 3.907556  | -2.474776 | -0.172060 |
| C | 4.861836  | 1.275255  | 0.048166  |
| H | 2.754752  | 1.675486  | 0.118691  |
| C | 5.863995  | 0.305241  | -0.035401 |
| H | 6.294080  | -1.807149 | -0.179427 |
| H | 5.127957  | 2.332459  | 0.111300  |
| H | 6.914980  | 0.602284  | -0.038425 |

56

Figure\_S8-1\_SIMes-Cu-allenyl / electronic energy: -2680.78923765 a.u. / lowest freq: 16.67 cm-1

|   |           |           |           |
|---|-----------|-----------|-----------|
| C | 0.255100  | -2.802091 | 0.505112  |
| H | 0.668208  | -3.196427 | 1.444813  |
| C | -1.270500 | -2.619391 | 0.554864  |
| H | -1.800083 | -3.253354 | -0.170485 |
| C | -0.267703 | -0.553149 | 0.091367  |
| C | -2.705673 | -0.570588 | 0.110299  |
| C | -3.379878 | -0.614762 | -1.117966 |
| C | -3.248840 | 0.082482  | 1.227243  |
| C | -4.637370 | -0.011781 | -1.202344 |
| C | -4.506955 | 0.673704  | 1.096602  |
| C | -5.220520 | 0.629249  | -0.105733 |

|    |           |           |           |
|----|-----------|-----------|-----------|
| Cu | 0.110016  | 1.307604  | -0.228361 |
| N  | 0.723169  | -1.433012 | 0.264097  |
| N  | -1.429749 | -1.197347 | 0.221108  |
| H  | -1.690544 | -2.824163 | 1.551562  |
| H  | 0.576639  | -3.468534 | -0.309931 |
| C  | 0.774672  | 3.096038  | -0.486998 |
| H  | 0.208773  | 4.016056  | -0.700711 |
| C  | 2.071525  | 3.214162  | -0.388898 |
| C  | 3.389142  | 3.271273  | -0.276397 |
| H  | 4.042154  | 3.124597  | -1.143427 |
| H  | 3.872005  | 3.450329  | 0.690170  |
| H  | -4.940744 | 1.189169  | 1.958286  |
| H  | -5.171125 | -0.034945 | -2.156636 |
| C  | -2.739174 | -1.258856 | -2.318184 |
| H  | -1.764393 | -0.794441 | -2.533026 |
| H  | -2.557008 | -2.332599 | -2.157552 |
| H  | -3.373859 | -1.155030 | -3.207828 |
| C  | -2.466468 | 0.177007  | 2.509466  |
| H  | -2.161688 | -0.814837 | 2.876499  |
| H  | -1.543922 | 0.758395  | 2.352392  |
| H  | -3.052793 | 0.668434  | 3.296712  |
| C  | 2.100609  | -1.074402 | 0.152530  |
| C  | 2.710868  | -1.089540 | -1.109969 |
| C  | 2.796150  | -0.676303 | 1.303159  |
| C  | 4.054490  | -0.718966 | -1.196317 |
| C  | 4.137867  | -0.315360 | 1.170431  |
| C  | 4.783410  | -0.329256 | -0.069282 |
| H  | 4.541691  | -0.721123 | -2.175444 |
| H  | 4.690272  | 0.002663  | 2.059240  |
| C  | 1.914463  | -1.435151 | -2.339256 |
| H  | 1.411113  | -2.409070 | -2.245646 |
| H  | 1.129881  | -0.679297 | -2.505515 |
| H  | 2.554756  | -1.464444 | -3.230551 |
| C  | 2.087510  | -0.585650 | 2.627443  |
| H  | 1.295980  | 0.179314  | 2.581836  |
| H  | 1.603679  | -1.535221 | 2.901538  |
| H  | 2.783525  | -0.310564 | 3.430477  |
| C  | -6.591070 | 1.245868  | -0.208877 |
| H  | -6.854724 | 1.465524  | -1.252764 |
| H  | -7.356052 | 0.560144  | 0.189860  |
| H  | -6.655115 | 2.179427  | 0.368353  |
| C  | 6.214528  | 0.121736  | -0.194929 |
| H  | 6.791322  | -0.109785 | 0.711774  |
| H  | 6.712484  | -0.348829 | -1.054371 |
| H  | 6.258068  | 1.212948  | -0.343793 |

88

Figure\_S8-1\_PA-SIMes-ed(1,6) / electronic energy: -3522.75056416 a.u. / lowest freq: 17.96 cm-1

|    |           |           |           |
|----|-----------|-----------|-----------|
| C  | -2.527994 | 2.419306  | -2.302324 |
| H  | -3.146331 | 3.157018  | -1.766728 |
| C  | -1.073498 | 2.875473  | -2.462589 |
| H  | -0.682842 | 2.695235  | -3.476988 |
| C  | -1.140079 | 1.029772  | -1.023287 |
| C  | 1.019789  | 2.165991  | -1.215969 |
| C  | 1.428317  | 3.203427  | -0.359770 |
| C  | 1.950519  | 1.300238  | -1.813307 |
| C  | 3.739907  | 2.455086  | -0.616591 |
| Cu | -0.554544 | -0.564931 | -0.009037 |
| N  | -2.376841 | 1.203276  | -1.496088 |
| N  | -0.369497 | 2.015628  | -1.501145 |
| C  | 0.457253  | -1.333672 | 1.592197  |
| C  | -0.344656 | -0.278074 | 2.074776  |
| H  | -0.931822 | 3.938255  | -2.228226 |
| H  | -3.015261 | 2.198652  | -3.261870 |
| H  | 0.081762  | -2.349144 | 1.729000  |
| C  | 0.140120  | 1.080083  | 2.456405  |
| C  | -1.684050 | -0.627642 | 2.633482  |
| O  | 1.425003  | 1.086897  | 2.821456  |
| O  | -0.548016 | 2.072804  | 2.486238  |
| O  | -2.257021 | -0.035195 | 3.515072  |
| O  | -2.189877 | -1.722053 | 2.048285  |
| C  | -3.411059 | -2.227162 | 2.563449  |
| H  | -3.260590 | -2.647732 | 3.568502  |
| H  | -3.731247 | -3.012421 | 1.870353  |
| H  | -4.169814 | -1.436003 | 2.611432  |
| C  | 1.961306  | 2.323071  | 3.267969  |
| H  | 1.836994  | 3.102615  | 2.506421  |
| H  | 3.026077  | 2.144219  | 3.451885  |
| H  | 1.465925  | 2.644402  | 4.195054  |
| C  | 1.839678  | -1.207156 | 1.154918  |
| H  | 2.242450  | -0.199482 | 1.031894  |
| C  | 2.601154  | -2.282621 | 0.869808  |
| H  | 2.156098  | -3.276276 | 0.983412  |
| C  | 4.000181  | -2.258631 | 0.422662  |
| C  | 4.611821  | -3.457300 | 0.021751  |
| C  | 4.764812  | -1.080112 | 0.384719  |
| C  | 5.932707  | -3.478369 | -0.419928 |
| H  | 4.036397  | -4.386058 | 0.051573  |
| C  | 6.084368  | -1.099552 | -0.055973 |
| H  | 4.323588  | -0.135467 | 0.706977  |

|   |           |           |           |
|---|-----------|-----------|-----------|
| C | 6.674150  | -2.297756 | -0.464108 |
| H | 6.385889  | -4.421941 | -0.731589 |
| H | 6.659378  | -0.171089 | -0.077404 |
| H | 7.710139  | -2.310789 | -0.809683 |
| C | -0.610406 | -2.268425 | -1.044647 |
| H | -1.635485 | -2.647512 | -1.187705 |
| C | 0.365234  | -2.968038 | -1.537848 |
| C | 1.415914  | -3.610512 | -2.024130 |
| H | 1.936427  | -4.378823 | -1.442979 |
| H | 1.797474  | -3.403341 | -3.030081 |
| C | 2.790321  | 3.327725  | -0.077595 |
| H | 3.120144  | 4.131138  | 0.587548  |
| C | 3.301137  | 1.456769  | -1.488657 |
| H | 4.031575  | 0.779266  | -1.939167 |
| C | 0.432950  | 4.171307  | 0.221496  |
| H | 0.118767  | 4.914825  | -0.528443 |
| H | -0.462629 | 3.650747  | 0.585659  |
| H | 0.869972  | 4.725432  | 1.063066  |
| C | 1.519617  | 0.233395  | -2.781284 |
| H | 1.071318  | -0.623260 | -2.256759 |
| H | 0.761942  | 0.608500  | -3.485117 |
| H | 2.377662  | -0.135717 | -3.358308 |
| C | -3.476807 | 0.380451  | -1.114729 |
| C | -3.845370 | -0.688784 | -1.942660 |
| C | -4.155635 | 0.661387  | 0.081405  |
| C | -4.913770 | -1.494793 | -1.539565 |
| C | -5.227837 | -0.160418 | 0.433810  |
| C | -5.614499 | -1.247904 | -0.355759 |
| H | -5.772793 | 0.051449  | 1.358458  |
| C | -3.096840 | -0.959557 | -3.219765 |
| H | -3.471370 | -1.868324 | -3.709155 |
| H | -3.201258 | -0.125487 | -3.931406 |
| H | -2.022278 | -1.091341 | -3.021900 |
| C | -3.733539 | 1.810599  | 0.956901  |
| H | -2.689716 | 1.708863  | 1.291718  |
| H | -3.810903 | 2.770961  | 0.423484  |
| H | -4.365423 | 1.871039  | 1.852508  |
| C | 5.195344  | 2.584307  | -0.251464 |
| H | 5.485539  | 3.637154  | -0.125658 |
| H | 5.403976  | 2.074941  | 0.704186  |
| H | 5.844294  | 2.134992  | -1.016132 |
| C | -6.739114 | -2.148604 | 0.082804  |
| H | -7.169794 | -2.699584 | -0.764710 |
| H | -6.377111 | -2.891533 | 0.812197  |
| H | -7.543230 | -1.578957 | 0.570583  |
| H | -5.207135 | -2.338193 | -2.171232 |

88

Figure\_S8-1\_PA-SIMes-ts(1,6) / electronic energy: -3522.73490214 a.u. / lowest freq: -466.76 cm-1

|    |           |           |           |
|----|-----------|-----------|-----------|
| C  | -2.553548 | 2.985525  | -1.600766 |
| H  | -3.213290 | 3.548654  | -0.921923 |
| C  | -1.111046 | 3.508690  | -1.595894 |
| H  | -0.715171 | 3.667104  | -2.611016 |
| C  | -1.139970 | 1.334777  | -0.716326 |
| C  | 0.993149  | 2.515192  | -0.582576 |
| C  | 1.324290  | 3.057087  | 0.668755  |
| C  | 1.977514  | 2.098832  | -1.490729 |
| C  | 3.683925  | 2.717653  | 0.144488  |
| Cu | -0.493297 | -0.447854 | -0.165785 |
| N  | -2.385408 | 1.610072  | -1.117371 |
| N  | -0.384849 | 2.415469  | -0.936688 |
| C  | 0.472784  | -1.841175 | 1.034531  |
| C  | -0.405921 | -1.083058 | 1.889616  |
| H  | -0.998001 | 4.449766  | -1.039720 |
| H  | -3.007325 | 2.995428  | -2.601600 |
| H  | 0.102458  | -2.832952 | 0.762725  |
| C  | 0.032009  | -0.001807 | 2.785056  |
| C  | -1.739502 | -1.663357 | 2.155230  |
| O  | 1.370558  | 0.147299  | 2.812346  |
| O  | -0.689461 | 0.706749  | 3.457566  |
| O  | -2.451704 | -1.467359 | 3.113308  |
| O  | -2.118303 | -2.501773 | 1.160538  |
| C  | -3.324584 | -3.216368 | 1.348849  |
| H  | -3.216548 | -3.963471 | 2.149824  |
| H  | -3.534861 | -3.718641 | 0.397629  |
| H  | -4.147446 | -2.536316 | 1.603938  |
| C  | 1.895564  | 1.087908  | 3.729115  |
| H  | 1.422433  | 2.070951  | 3.611917  |
| H  | 2.968213  | 1.159513  | 3.515897  |
| H  | 1.742689  | 0.747498  | 4.764188  |
| C  | 1.783578  | -1.547287 | 0.613975  |
| H  | 2.210801  | -0.568223 | 0.833659  |
| C  | 2.525055  | -2.482838 | -0.117044 |
| H  | 2.205245  | -3.522814 | -0.019130 |
| C  | 3.976728  | -2.314661 | -0.362307 |
| C  | 4.792226  | -3.445430 | -0.512259 |
| C  | 4.571170  | -1.047870 | -0.466391 |
| C  | 6.160613  | -3.316970 | -0.747481 |
| H  | 4.345464  | -4.440745 | -0.438521 |
| C  | 5.936267  | -0.918000 | -0.705435 |

|   |           |           |           |
|---|-----------|-----------|-----------|
| H | 3.954777  | -0.151810 | -0.375467 |
| C | 6.739519  | -2.052194 | -0.845544 |
| H | 6.777406  | -4.212140 | -0.855101 |
| H | 6.377881  | 0.078121  | -0.788031 |
| H | 7.810535  | -1.948383 | -1.032162 |
| C | -0.423878 | -1.472821 | -1.954503 |
| H | -1.342671 | -1.263822 | -2.500109 |
| C | 0.641195  | -2.090153 | -2.236641 |
| C | 1.904023  | -2.599588 | -2.225006 |
| H | 2.044406  | -3.683320 | -2.261627 |
| H | 2.692050  | -2.013040 | -2.709771 |
| C | 2.675336  | 3.145065  | 1.012277  |
| H | 2.947531  | 3.561336  | 1.986070  |
| C | 3.315524  | 2.214538  | -1.106595 |
| H | 4.093021  | 1.895402  | -1.806483 |
| C | 0.246761  | 3.521278  | 1.611518  |
| H | -0.436514 | 4.234703  | 1.127379  |
| H | -0.364025 | 2.678320  | 1.970034  |
| H | 0.681582  | 4.019819  | 2.488147  |
| C | 1.603343  | 1.523150  | -2.828803 |
| H | 1.063337  | 0.572624  | -2.702687 |
| H | 0.946568  | 2.200378  | -3.395389 |
| H | 2.498065  | 1.330626  | -3.435518 |
| C | -3.483553 | 0.721166  | -0.931855 |
| C | -3.989154 | 0.008540  | -2.027802 |
| C | -4.042900 | 0.596991  | 0.352359  |
| C | -5.050021 | -0.875799 | -1.807424 |
| C | -5.107384 | -0.288670 | 0.519986  |
| C | -5.616989 | -1.042703 | -0.542939 |
| H | -5.552171 | -0.394539 | 1.513746  |
| C | -3.431922 | 0.199340  | -3.414045 |
| H | -3.508854 | -0.726775 | -4.000411 |
| H | -3.994338 | 0.976918  | -3.956413 |
| H | -2.379270 | 0.513758  | -3.393203 |
| C | -3.506340 | 1.390306  | 1.512722  |
| H | -2.547657 | 0.988282  | 1.874144  |
| H | -3.335331 | 2.442308  | 1.239968  |
| H | -4.207465 | 1.363670  | 2.356991  |
| C | 5.130302  | 2.758699  | 0.560928  |
| H | 5.320883  | 3.563213  | 1.284990  |
| H | 5.415365  | 1.808650  | 1.042549  |
| H | 5.795703  | 2.902398  | -0.302312 |
| C | -6.725851 | -2.034965 | -0.312888 |
| H | -7.242690 | -2.289021 | -1.248565 |
| H | -6.322790 | -2.969923 | 0.109559  |
| H | -7.467843 | -1.649656 | 0.401348  |
| H | -5.443326 | -1.448353 | -2.652348 |

88

Figure\_S8-1\_PA-SIMes-prod(1,6) / electronic energy: -3522.78247192 a.u. / lowest freq: 12.71 cm-1

|    |           |           |           |
|----|-----------|-----------|-----------|
| C  | -2.343354 | 3.489735  | -0.587000 |
| H  | -2.977800 | 3.835895  | 0.244118  |
| C  | -0.884877 | 3.953618  | -0.454347 |
| H  | -0.503604 | 4.414974  | -1.377822 |
| C  | -0.972881 | 1.618208  | -0.259313 |
| C  | 1.201057  | 2.615953  | 0.140870  |
| C  | 1.564122  | 2.497314  | 1.491759  |
| C  | 2.158150  | 2.642698  | -0.882234 |
| C  | 3.903937  | 2.387813  | 0.806662  |
| Cu | -0.416406 | -0.207418 | -0.001060 |
| N  | -2.213883 | 2.028268  | -0.538453 |
| N  | -0.183217 | 2.693705  | -0.184539 |
| C  | 0.323312  | -2.112501 | 0.324824  |
| C  | -0.504972 | -1.842421 | 1.503513  |
| H  | -0.735181 | 4.666315  | 0.369264  |
| H  | -2.808073 | 3.815022  | -1.527687 |
| H  | -0.120464 | -2.845171 | -0.355951 |
| C  | 0.007472  | -1.246736 | 2.731602  |
| C  | -1.846777 | -2.423201 | 1.534759  |
| O  | 1.342688  | -0.999985 | 2.665569  |
| O  | -0.616897 | -0.962286 | 3.736187  |
| O  | -2.611411 | -2.486839 | 2.475892  |
| O  | -2.213973 | -2.926864 | 0.320950  |
| C  | -3.462829 | -3.580983 | 0.261761  |
| H  | -3.451869 | -4.516238 | 0.842822  |
| H  | -3.644153 | -3.806233 | -0.796206 |
| H  | -4.264816 | -2.937999 | 0.648925  |
| C  | 1.960799  | -0.519270 | 3.839866  |
| H  | 1.472444  | 0.392200  | 4.210688  |
| H  | 3.002729  | -0.304651 | 3.573544  |
| H  | 1.932280  | -1.275451 | 4.639092  |
| C  | 1.483310  | -1.527598 | -0.116257 |
| H  | 2.051629  | -0.843365 | 0.518104  |
| C  | 2.106017  | -1.931752 | -1.435431 |
| H  | 1.708991  | -2.919649 | -1.716817 |
| C  | 3.615361  | -2.050368 | -1.340040 |
| C  | 4.256075  | -3.267408 | -1.591367 |
| C  | 4.400486  | -0.940946 | -0.999834 |
| C  | 5.644953  | -3.377883 | -1.504918 |
| H  | 3.659204  | -4.144690 | -1.855723 |

|   |           |           |           |
|---|-----------|-----------|-----------|
| C | 5.787612  | -1.045416 | -0.917646 |
| H | 3.921367  | 0.018957  | -0.792445 |
| C | 6.416011  | -2.266287 | -1.168700 |
| H | 6.125450  | -4.339292 | -1.700290 |
| H | 6.381670  | -0.167054 | -0.654126 |
| H | 7.502779  | -2.350944 | -1.099679 |
| C | -0.932038 | -0.993178 | -2.957833 |
| H | -1.999740 | -1.036654 | -3.077480 |
| C | 0.270482  | -0.948199 | -2.818193 |
| C | 1.713330  | -0.958812 | -2.582084 |
| H | 2.234279  | -1.248056 | -3.508973 |
| H | 2.047188  | 0.060063  | -2.329539 |
| C | 2.919656  | 2.378615  | 1.800205  |
| H | 3.216768  | 2.277321  | 2.847700  |
| C | 3.505412  | 2.534453  | -0.524765 |
| H | 4.263657  | 2.548744  | -1.312772 |
| C | 0.512377  | 2.484362  | 2.567458  |
| H | -0.222475 | 3.290191  | 2.424323  |
| H | -0.049702 | 1.537115  | 2.566403  |
| H | 0.964861  | 2.608470  | 3.559941  |
| C | 1.746187  | 2.782417  | -2.323514 |
| H | 0.851579  | 2.180939  | -2.544400 |
| H | 1.506284  | 3.829817  | -2.568107 |
| H | 2.553637  | 2.466308  | -2.997637 |
| C | -3.335573 | 1.150961  | -0.597060 |
| C | -3.908741 | 0.860661  | -1.845023 |
| C | -3.844319 | 0.605193  | 0.594366  |
| C | -4.992947 | -0.019753 | -1.885286 |
| C | -4.930892 | -0.267340 | 0.501769  |
| C | -5.515218 | -0.596388 | -0.724558 |
| H | -5.335317 | -0.699396 | 1.421584  |
| C | -3.383122 | 1.490546  | -3.108071 |
| H | -3.648070 | 0.889902  | -3.989223 |
| H | -3.815951 | 2.493230  | -3.257612 |
| H | -2.289949 | 1.603150  | -3.078407 |
| C | -3.241861 | 0.924436  | 1.936387  |
| H | -2.436382 | 0.217439  | 2.189638  |
| H | -2.814781 | 1.936202  | 1.965906  |
| H | -4.000274 | 0.844121  | 2.726610  |
| C | 5.353495  | 2.200443  | 1.168130  |
| H | 5.619137  | 2.768842  | 2.071214  |
| H | 5.559776  | 1.138541  | 1.379188  |
| H | 6.019367  | 2.514934  | 0.352438  |
| C | -6.664776 | -1.567100 | -0.788847 |
| H | -7.186919 | -1.511425 | -1.753878 |
| H | -6.305798 | -2.601204 | -0.662410 |
| H | -7.394336 | -1.377038 | 0.011753  |
| H | -5.443825 | -0.258384 | -2.852834 |

88

Figure\_S8-1\_PA-SIMes-ed(1,4AA) / electronic energy: -3522.75057238 a.u. / lowest freq: 18.06 cm<sup>-1</sup>

|    |           |           |           |
|----|-----------|-----------|-----------|
| C  | -2.527572 | 2.419661  | -2.303532 |
| H  | -3.146476 | 3.157352  | -1.768564 |
| C  | -1.073069 | 2.876220  | -2.462915 |
| H  | -0.681822 | 2.696314  | -3.477143 |
| C  | -1.139997 | 1.030399  | -1.023766 |
| C  | 1.019980  | 2.166419  | -1.216062 |
| C  | 1.428789  | 3.203841  | -0.359980 |
| C  | 1.950477  | 1.300314  | -1.813251 |
| C  | 3.740170  | 2.454796  | -0.616642 |
| Cu | -0.554831 | -0.564305 | -0.009155 |
| N  | -2.376614 | 1.203855  | -1.496980 |
| N  | -0.369328 | 2.016360  | -1.501281 |
| C  | 0.456472  | -1.332927 | 1.592596  |
| C  | -0.345634 | -0.277382 | 2.074907  |
| H  | -0.931794 | 3.938989  | -2.228246 |
| H  | -3.014115 | 2.198620  | -3.263362 |
| H  | 0.080924  | -2.348380 | 1.729360  |
| C  | 0.138898  | 1.080894  | 2.456373  |
| C  | -1.685075 | -0.627138 | 2.633385  |
| O  | 1.423793  | 1.087941  | 2.821398  |
| O  | -0.549381 | 2.073525  | 2.486077  |
| O  | -2.258356 | -0.034562 | 3.514700  |
| O  | -2.190524 | -1.721831 | 2.048369  |
| C  | -3.411425 | -2.227402 | 2.563720  |
| H  | -3.259918 | -2.650575 | 3.567537  |
| H  | -3.733421 | -3.010475 | 1.868975  |
| H  | -4.169395 | -1.435639 | 2.614804  |
| C  | 1.959961  | 2.324216  | 3.267782  |
| H  | 1.835586  | 3.103675  | 2.506159  |
| H  | 3.024748  | 2.145489  | 3.451725  |
| H  | 1.464543  | 2.645593  | 4.194832  |
| C  | 1.839035  | -1.206598 | 1.155668  |
| H  | 2.242086  | -0.199012 | 1.032859  |
| C  | 2.600220  | -2.282287 | 0.870618  |
| H  | 2.154740  | -3.275781 | 0.984020  |
| C  | 3.999325  | -2.258855 | 0.423720  |
| C  | 4.610734  | -3.457882 | 0.023529  |
| C  | 4.764234  | -1.080536 | 0.385260  |
| C  | 5.931678  | -3.479501 | -0.417951 |



|   |           |           |           |
|---|-----------|-----------|-----------|
| H | 4.035107  | -4.386503 | 0.053786  |
| C | 6.083843  | -1.100520 | -0.055234 |
| H | 4.323151  | -0.135616 | 0.706894  |
| C | 6.673400  | -2.299085 | -0.462647 |
| H | 6.384685  | -4.423348 | -0.729035 |
| H | 6.659071  | -0.172202 | -0.077097 |
| H | 7.709433  | -2.312551 | -0.808075 |
| C | -0.610124 | -2.268833 | -1.043121 |
| H | -1.635044 | -2.649290 | -1.183682 |
| C | 0.365423  | -2.967796 | -1.537406 |
| C | 1.415951  | -3.609567 | -2.024963 |
| H | 1.795289  | -3.403115 | -3.031904 |
| H | 1.938633  | -4.376448 | -1.443869 |
| C | 2.790818  | 3.327771  | -0.077766 |
| H | 3.120851  | 4.131145  | 0.587318  |
| C | 3.301133  | 1.456503  | -1.488595 |
| H | 4.031385  | 0.778728  | -1.939000 |
| C | 0.433648  | 4.172018  | 0.221176  |
| H | 0.119263  | 4.915246  | -0.528963 |
| H | -0.461848 | 3.651633  | 0.585805  |
| H | 0.870948  | 4.726488  | 1.062379  |
| C | 1.519316  | 0.233412  | -2.781047 |
| H | 1.071292  | -0.623259 | -2.256310 |
| H | 0.761385  | 0.608420  | -3.484650 |
| H | 2.377193  | -0.135686 | -3.358328 |
| C | -3.476187 | 0.380039  | -1.116637 |
| C | -3.841124 | -0.690637 | -1.942781 |
| C | -4.155910 | 0.660149  | 0.080283  |
| C | -4.906989 | -1.500674 | -1.537793 |
| C | -5.224385 | -0.164389 | 0.433776  |
| C | -5.608291 | -1.254306 | -0.355378 |
| H | -5.195877 | -2.347378 | -2.166939 |
| H | -5.768497 | 0.044646  | 1.359699  |
| C | 5.195641  | 2.583630  | -0.251506 |
| H | 5.486203  | 3.636412  | -0.126004 |
| H | 5.404074  | 2.074473  | 0.704299  |
| H | 5.844451  | 2.133865  | -1.016027 |
| C | -3.734815 | 1.810115  | 0.955262  |
| H | -2.691216 | 1.708894  | 1.290975  |
| H | -3.811947 | 2.770016  | 0.421010  |
| H | -4.367459 | 1.871070  | 1.850301  |
| C | -3.091384 | -0.962133 | -3.219021 |
| H | -3.196710 | -0.129164 | -3.931810 |
| H | -2.016726 | -1.092232 | -3.020535 |
| H | -3.464399 | -1.872064 | -3.707406 |
| C | -6.745203 | -2.141374 | 0.079386  |
| H | -6.503713 | -2.650103 | 1.025954  |
| H | -7.661721 | -1.557120 | 0.252061  |
| H | -6.967262 | -2.911803 | -0.671484 |

88

Figure\_S8-1\_PA-SIMes-ts(1,4AA) / electronic energy: -3522.72443459 a.u. / lowest freq: -348.68 cm-1

|    |           |           |           |
|----|-----------|-----------|-----------|
| C  | -2.858551 | 3.214128  | -1.054087 |
| H  | -3.513762 | 3.609003  | -0.261924 |
| C  | -1.442902 | 3.818587  | -1.011000 |
| H  | -1.118716 | 4.203247  | -1.990185 |
| C  | -1.317023 | 1.527041  | -0.561999 |
| C  | 0.772673  | 2.716438  | -0.332342 |
| C  | 1.182323  | 3.033917  | 0.972607  |
| C  | 1.692774  | 2.391356  | -1.337692 |
| C  | 3.499542  | 2.721916  | 0.269886  |
| Cu | -0.604794 | -0.213176 | -0.187831 |
| N  | -2.595926 | 1.787448  | -0.832148 |
| N  | -0.623295 | 2.665110  | -0.620019 |
| C  | 0.500491  | -1.920165 | 0.355640  |
| C  | -0.327331 | -1.415504 | 1.487368  |
| H  | -1.350768 | 4.634631  | -0.280373 |
| H  | -3.359012 | 3.375692  | -2.019225 |
| H  | 0.304810  | -2.974505 | 0.150543  |
| C  | 0.140048  | -0.520941 | 2.549529  |
| C  | -1.612384 | -2.088984 | 1.711366  |
| O  | 1.473756  | -0.296613 | 2.516192  |
| O  | -0.545135 | -0.006930 | 3.413358  |
| O  | -2.331069 | -2.036474 | 2.686374  |
| O  | -1.955089 | -2.860149 | 0.643521  |
| C  | -3.132503 | -3.631998 | 0.770775  |
| H  | -3.013882 | -4.410416 | 1.539822  |
| H  | -3.301685 | -4.099193 | -0.206535 |
| H  | -3.990256 | -3.000586 | 1.037260  |
| C  | 2.018621  | 0.500450  | 3.547037  |
| H  | 1.511123  | 1.471462  | 3.618173  |
| H  | 3.074765  | 0.649885  | 3.293304  |
| H  | 1.937786  | -0.006582 | 4.520298  |
| C  | 1.930230  | -1.562542 | 0.214483  |
| H  | 2.194942  | -0.510063 | 0.331116  |
| C  | 2.866628  | -2.464778 | -0.106274 |
| H  | 2.563266  | -3.510931 | -0.229379 |
| C  | 4.296700  | -2.193209 | -0.328733 |
| C  | 5.142201  | -3.250676 | -0.698046 |
| C  | 4.859962  | -0.912127 | -0.194373 |

|   |           |           |           |
|---|-----------|-----------|-----------|
| C | 6.501086  | -3.041235 | -0.928656 |
| H | 4.722776  | -4.254309 | -0.808407 |
| C | 6.216182  | -0.702470 | -0.422192 |
| H | 4.228463  | -0.067021 | 0.087388  |
| C | 7.044845  | -1.765326 | -0.790934 |
| H | 7.138119  | -3.880545 | -1.216955 |
| H | 6.634005  | 0.300364  | -0.309343 |
| H | 8.109092  | -1.596839 | -0.968762 |
| C | -0.170783 | -1.661775 | -1.552322 |
| H | -1.124808 | -2.185638 | -1.690670 |
| C | 0.722397  | -1.621728 | -2.498537 |
| C | 1.703287  | -1.602376 | -3.374143 |
| H | 1.818871  | -0.783161 | -4.090810 |
| H | 2.435214  | -2.416566 | -3.410423 |
| C | 2.550225  | 3.042570  | 1.246385  |
| H | 2.886622  | 3.293604  | 2.256279  |
| C | 3.052695  | 2.392936  | -1.012388 |
| H | 3.781189  | 2.130459  | -1.784428 |
| C | 0.166339  | 3.301236  | 2.050316  |
| H | -0.581983 | 4.044213  | 1.739215  |
| H | -0.377911 | 2.378140  | 2.309034  |
| H | 0.650307  | 3.674575  | 2.962733  |
| C | 1.216078  | 2.016900  | -2.714616 |
| H | 0.650758  | 1.072619  | -2.679178 |
| H | 0.544689  | 2.782421  | -3.131510 |
| H | 2.060283  | 1.886688  | -3.404034 |
| C | -3.611974 | 0.794072  | -0.706108 |
| C | -4.037929 | 0.108089  | -1.853252 |
| C | -4.112159 | 0.489400  | 0.569133  |
| C | -5.015540 | -0.877675 | -1.706356 |
| C | -5.094747 | -0.499316 | 0.665566  |
| C | -5.563609 | -1.186187 | -0.456974 |
| H | -5.351987 | -1.426177 | -2.590819 |
| H | -5.490973 | -0.751257 | 1.653140  |
| C | 4.966669  | 2.719762  | 0.611269  |
| H | 5.265006  | 3.667049  | 1.084504  |
| H | 5.203500  | 1.914088  | 1.324697  |
| H | 5.587477  | 2.574492  | -0.283510 |
| C | -3.556656 | 1.142865  | 1.805693  |
| H | -2.623196 | 0.645064  | 2.119089  |
| H | -3.327747 | 2.206110  | 1.647218  |
| H | -4.265466 | 1.062449  | 2.640600  |
| C | -3.403672 | 0.393259  | -3.188155 |
| H | -3.525259 | 1.447057  | -3.481410 |
| H | -2.321472 | 0.190268  | -3.150317 |
| H | -3.843661 | -0.231731 | -3.976262 |
| C | -6.636143 | -2.235142 | -0.322705 |
| H | -6.597802 | -2.724113 | 0.661181  |
| H | -7.636308 | -1.784464 | -0.427304 |
| H | -6.541096 | -3.008555 | -1.098123 |

88

Figure\_S8-1\_PA-SIMes-prod(1,4AA) / electronic energy: -3522.77095735 a.u. / lowest freq: 13.52 cm-1

|    |           |           |           |
|----|-----------|-----------|-----------|
| C  | 2.640161  | 3.389805  | 1.250127  |
| H  | 3.381230  | 3.881550  | 0.601628  |
| C  | 1.214778  | 3.941474  | 1.045695  |
| H  | 0.749850  | 4.270098  | 1.986821  |
| C  | 1.271493  | 1.693527  | 0.409752  |
| C  | -0.850639 | 2.784192  | 0.047269  |
| C  | -1.114466 | 2.938982  | -1.321971 |
| C  | -1.878971 | 2.565875  | 0.977101  |
| C  | -3.497246 | 2.685109  | -0.846982 |
| Cu | 0.766794  | 0.021256  | -0.357702 |
| N  | 2.490182  | 1.980860  | 0.865707  |
| N  | 0.505261  | 2.779808  | 0.494322  |
| C  | -0.486412 | -2.483952 | -0.166209 |
| C  | 0.225407  | -1.673997 | -1.283098 |
| H  | 1.182296  | 4.782397  | 0.337937  |
| H  | 2.984858  | 3.481921  | 2.289720  |
| H  | -0.596337 | -3.545425 | -0.453579 |
| C  | -0.558683 | -1.069547 | -2.385321 |
| C  | 1.559201  | -2.131788 | -1.729722 |
| O  | -1.863538 | -1.400275 | -2.341889 |
| O  | -0.140826 | -0.332201 | -3.259086 |
| O  | 2.276443  | -1.617223 | -2.565809 |
| O  | 1.959950  | -3.258922 | -1.093495 |
| C  | 3.289642  | -3.680887 | -1.333835 |
| H  | 3.456596  | -3.885010 | -2.400655 |
| H  | 3.431307  | -4.598404 | -0.751022 |
| H  | 4.007992  | -2.914172 | -1.005731 |
| C  | -2.738630 | -0.684138 | -3.189796 |
| H  | -2.645456 | 0.398845  | -3.019791 |
| H  | -3.752048 | -1.016211 | -2.934224 |
| H  | -2.532379 | -0.893866 | -4.249301 |
| C  | -1.843030 | -1.933202 | 0.186607  |
| H  | -1.886973 | -0.841284 | 0.287422  |
| C  | -2.927734 | -2.665633 | 0.453801  |
| H  | -2.858786 | -3.757493 | 0.383437  |
| C  | -4.243942 | -2.127082 | 0.843554  |
| C  | -5.210181 | -2.981474 | 1.396820  |

|   |           |           |           |
|---|-----------|-----------|-----------|
| C | -4.582652 | -0.773266 | 0.673037  |
| C | -6.460701 | -2.501902 | 1.785683  |
| H | -4.973094 | -4.040596 | 1.529317  |
| C | -5.829493 | -0.292942 | 1.062773  |
| H | -3.863262 | -0.085674 | 0.222328  |
| C | -6.776049 | -1.153499 | 1.623422  |
| H | -7.193718 | -3.188223 | 2.216237  |
| H | -6.069572 | 0.763129  | 0.917319  |
| H | -7.755110 | -0.774444 | 1.924557  |
| C | 0.374117  | -2.446764 | 1.103269  |
| H | 1.396385  | -2.822709 | 1.006424  |
| C | -0.008058 | -1.986252 | 2.270138  |
| C | -0.370110 | -1.533806 | 3.444492  |
| H | -0.239226 | -0.480614 | 3.713732  |
| H | -0.822319 | -2.192785 | 4.192795  |
| C | -2.446139 | 2.890956  | -1.743989 |
| H | -2.664934 | 3.012458  | -2.808689 |
| C | -3.194075 | 2.531220  | 0.509741  |
| H | -4.002568 | 2.359704  | 1.225968  |
| C | 0.005667  | 3.077558  | -2.316753 |
| H | 0.793477  | 3.756669  | -1.960766 |
| H | 0.469378  | 2.093613  | -2.497251 |
| H | -0.368223 | 3.451025  | -3.279170 |
| C | -1.561886 | 2.319818  | 2.426850  |
| H | -0.826932 | 1.506590  | 2.525195  |
| H | -1.130492 | 3.210281  | 2.909685  |
| H | -2.463723 | 2.036161  | 2.984749  |
| C | 3.549020  | 1.023460  | 0.828640  |
| C | 3.880944  | 0.330855  | 2.004042  |
| C | 4.172088  | 0.738334  | -0.395958 |
| C | 4.874375  | -0.646986 | 1.936091  |
| C | 5.158590  | -0.251644 | -0.415353 |
| C | 5.526362  | -0.950942 | 0.736123  |
| H | 5.134254  | -1.199971 | 2.843227  |
| H | 5.642758  | -0.490672 | -1.366343 |
| C | -4.917002 | 2.570536  | -1.335331 |
| H | -5.061831 | 3.101202  | -2.286522 |
| H | -5.177768 | 1.512572  | -1.504715 |
| H | -5.630893 | 2.971375  | -0.601338 |
| C | 3.745187  | 1.409835  | -1.673191 |
| H | 2.898616  | 0.860241  | -2.117239 |
| H | 3.425063  | 2.448453  | -1.512856 |
| H | 4.560251  | 1.404634  | -2.409123 |
| C | 3.137809  | 0.599242  | 3.284784  |
| H | 3.304653  | 1.624535  | 3.649457  |
| H | 2.054189  | 0.477784  | 3.134735  |
| H | 3.452961  | -0.094311 | 4.075126  |
| C | 6.608839  | -1.997072 | 0.688525  |
| H | 6.647976  | -2.490160 | -0.293236 |
| H | 7.596609  | -1.541890 | 0.866191  |
| H | 6.458094  | -2.767494 | 1.457982  |

88

Figure\_S8-1\_PA-SIMes-ed(1,4) / electronic energy: -3522.74163171 a.u. / lowest freq: 14.52 cm<sup>-1</sup>

|   |           |           |           |
|---|-----------|-----------|-----------|
| H | -5.734861 | 0.740948  | 0.551066  |
| H | -4.821706 | 2.942395  | 0.388308  |
| C | -4.990928 | 0.835159  | -0.254647 |
| C | -4.389217 | 2.245808  | -0.345432 |
| H | -5.468395 | 0.515876  | -1.192566 |
| N | -3.811562 | 0.014791  | 0.039224  |
| N | -2.970420 | 2.007124  | -0.047659 |
| H | -4.504381 | 2.695120  | -1.343251 |
| H | -4.372332 | -0.917869 | -2.512992 |
| H | -2.684275 | 2.622907  | -2.689801 |
| C | -3.599007 | -1.662236 | -2.272764 |
| C | -1.616516 | 2.752666  | -2.458199 |
| H | -2.620177 | -1.162387 | -2.347426 |
| H | -1.163179 | 1.752051  | -2.382864 |
| H | -3.641156 | -2.451173 | -3.035906 |
| H | -0.541364 | -4.452530 | 2.049773  |
| H | 5.240316  | -2.602385 | -0.620373 |
| C | 5.358322  | -1.540034 | -0.378400 |
| C | 6.674230  | -1.161767 | 0.150459  |
| C | 7.004731  | 0.159238  | 0.501717  |
| H | 7.409493  | -3.191159 | 0.048458  |
| C | 7.649755  | -2.158574 | 0.314732  |
| C | 8.266563  | 0.466516  | 0.998778  |
| H | 8.505055  | 1.498448  | 1.265127  |
| C | 8.913814  | -1.851063 | 0.813323  |
| C | 9.226243  | -0.536450 | 1.156783  |
| H | 9.657864  | -2.641295 | 0.933553  |
| H | 10.215690 | -0.291762 | 1.548920  |
| H | -4.201360 | -1.544123 | 3.641174  |
| H | -4.746418 | -0.200901 | 2.603973  |
| C | -3.990481 | -0.992447 | 2.715751  |
| H | -3.014133 | -0.493439 | 2.829281  |
| H | -4.032678 | -3.715837 | 2.699181  |
| C | -3.960075 | -1.914725 | 1.527273  |
| C | -3.967724 | -3.301365 | 1.689152  |
| H | 1.307231  | -0.952864 | 1.814171  |

|    |           |           |           |
|----|-----------|-----------|-----------|
| C  | -3.862135 | -1.399273 | 0.225843  |
| C  | -2.683201 | 0.722615  | 0.173110  |
| C  | -3.879812 | -4.169366 | 0.597768  |
| C  | 0.346581  | -1.300744 | 1.404411  |
| Cu | -1.052478 | -0.167261 | 0.700822  |
| C  | -3.776298 | -2.238956 | -0.894549 |
| C  | -3.793300 | -3.619690 | -0.684187 |
| H  | -1.076764 | -3.142790 | -1.536620 |
| H  | -3.721443 | -4.286440 | -1.548636 |
| C  | -0.338350 | -3.233415 | -2.346957 |
| O  | -0.339444 | -0.609497 | -2.102168 |
| H  | -0.028471 | -4.278202 | -2.455331 |
| C  | 0.696617  | -1.191358 | -1.865462 |
| H  | -0.777421 | -2.868857 | -3.285953 |
| O  | 0.836115  | -2.504369 | -2.019043 |
| C  | 1.923876  | -0.532726 | -1.346562 |
| H  | -2.160876 | 3.793273  | 3.367979  |
| H  | -3.515235 | 3.126406  | 2.422182  |
| C  | -2.418183 | 3.171234  | 2.500635  |
| H  | -2.070146 | 2.144146  | 2.694619  |
| H  | -0.723185 | 5.296236  | 2.218871  |
| C  | -1.788708 | 3.704308  | 1.241773  |
| C  | -0.921990 | 4.798437  | 1.265385  |
| C  | -2.031981 | 3.078602  | 0.008916  |
| C  | -0.299636 | 5.266697  | 0.102552  |
| C  | 0.169038  | -2.591659 | 1.341079  |
| C  | -1.406573 | 3.502163  | -1.171735 |
| C  | -0.548494 | 4.603131  | -1.100904 |
| C  | -0.055780 | -3.893319 | 1.242670  |
| H  | 0.236409  | -4.453027 | 0.347796  |
| H  | -0.049469 | 4.940817  | -2.013250 |
| H  | 0.886915  | 2.796259  | 0.649508  |
| H  | -1.142974 | 3.276397  | -3.298823 |
| H  | 2.452131  | 2.708726  | 1.529809  |
| C  | 1.964449  | 2.602457  | 0.555140  |
| O  | 2.177320  | 1.257465  | 0.148326  |
| C  | 1.785570  | 0.933922  | -1.084056 |
| C  | 3.053698  | -1.235593 | -1.108652 |
| H  | 3.026447  | -2.302830 | -1.345123 |
| O  | 1.368771  | 1.735653  | -1.880960 |
| H  | 2.391692  | 3.309524  | -0.169018 |
| C  | 4.302895  | -0.725717 | -0.584390 |
| H  | 4.362845  | 0.337750  | -0.345201 |
| H  | 6.269554  | 0.958011  | 0.386974  |
| C  | 0.662463  | 6.424263  | 0.163681  |
| C  | -3.825352 | -5.659969 | 0.801953  |
| H  | -2.780789 | -5.985971 | 0.934232  |
| H  | -4.234403 | -6.201663 | -0.062564 |
| H  | -4.381598 | -5.965657 | 1.699467  |
| H  | 0.765832  | 6.915289  | -0.813954 |
| H  | 1.664287  | 6.078822  | 0.467141  |
| H  | 0.340454  | 7.176316  | 0.898128  |

88

Figure\_S8-1\_PA-SIMes-ts(1,4) / electronic energy: -3522.71682623 a.u. / lowest freq: -448.70 cm<sup>-1</sup>

|   |           |           |           |
|---|-----------|-----------|-----------|
| H | -5.838684 | 0.244181  | 0.656601  |
| H | -5.196545 | 2.540081  | 0.477949  |
| C | -5.184200 | 0.440290  | -0.207288 |
| C | -4.709409 | 1.899611  | -0.271190 |
| H | -5.719970 | 0.124714  | -1.114178 |
| N | -3.920004 | -0.292959 | -0.062866 |
| N | -3.273765 | 1.769598  | 0.004387  |
| H | -4.869275 | 2.355214  | -1.261086 |
| H | -4.420802 | -0.971587 | -2.664659 |
| H | -2.945536 | 2.240509  | -2.624667 |
| C | -3.654910 | -1.746301 | -2.512279 |
| C | -1.888302 | 2.451392  | -2.405846 |
| H | -2.670246 | -1.252615 | -2.542436 |
| H | -1.363929 | 1.488881  | -2.297133 |
| H | -3.715566 | -2.457151 | -3.347170 |
| H | 2.832391  | -1.767425 | 2.419991  |
| H | 4.960104  | -2.598100 | 0.356185  |
| C | 5.216779  | -1.551407 | 0.153633  |
| C | 6.658211  | -1.256844 | 0.138344  |
| C | 7.176459  | 0.033819  | -0.069703 |
| H | 7.184618  | -3.318354 | 0.505775  |
| C | 7.567580  | -2.307542 | 0.341815  |
| C | 8.549319  | 0.258834  | -0.074994 |
| H | 8.930241  | 1.269535  | -0.238228 |
| C | 8.942936  | -2.083222 | 0.337031  |
| C | 9.440431  | -0.797796 | 0.127938  |
| H | 9.629823  | -2.917253 | 0.497436  |
| H | 10.517583 | -0.617556 | 0.123162  |
| H | -3.997737 | -2.168381 | 3.403180  |
| H | -4.659967 | -0.769833 | 2.519258  |
| C | -3.865589 | -1.530843 | 2.519264  |
| H | -2.908068 | -0.996148 | 2.619303  |
| H | -3.823515 | -4.245533 | 2.262478  |
| C | -3.872649 | -2.346668 | 1.254446  |
| C | -3.832830 | -3.742050 | 1.291562  |

|    |           |           |           |
|----|-----------|-----------|-----------|
| H  | -0.684576 | 0.202434  | 2.998290  |
| C  | -3.869005 | -1.715824 | 0.000777  |
| C  | -2.856570 | 0.502993  | 0.087090  |
| C  | -3.804763 | -4.508187 | 0.121443  |
| C  | -0.038864 | -0.100331 | 2.168777  |
| Cu | -0.994871 | -0.056969 | 0.412918  |
| C  | -3.806317 | -2.449642 | -1.191993 |
| C  | -3.790311 | -3.844373 | -1.107929 |
| H  | -1.179101 | -3.032310 | -0.120051 |
| H  | -3.737251 | -4.427493 | -2.031907 |
| C  | -0.458834 | -3.368672 | -0.882676 |
| O  | -0.466116 | -0.836872 | -1.550263 |
| H  | -0.157739 | -4.401571 | -0.674997 |
| C  | 0.599658  | -1.277528 | -1.096730 |
| H  | -0.940762 | -3.306278 | -1.867558 |
| O  | 0.724327  | -2.591407 | -0.835734 |
| C  | 1.784022  | -0.501267 | -0.792970 |
| H  | -2.527445 | 3.674034  | 3.370672  |
| H  | -3.960716 | 3.209356  | 2.427270  |
| C  | -2.867206 | 3.099956  | 2.498612  |
| H  | -2.661308 | 2.034381  | 2.681566  |
| H  | -1.129672 | 5.183790  | 2.187043  |
| C  | -2.181892 | 3.564989  | 1.241919  |
| C  | -1.306846 | 4.651041  | 1.248184  |
| C  | -2.386638 | 2.885281  | 0.030626  |
| C  | -0.643534 | 5.065966  | 0.086938  |
| C  | 1.180791  | -0.447167 | 2.249907  |
| C  | -1.724789 | 3.256817  | -1.146753 |
| C  | -0.862910 | 4.356930  | -1.095449 |
| C  | 2.493253  | -0.775362 | 2.106916  |
| H  | 3.222939  | 0.032110  | 2.213759  |
| H  | -0.334762 | 4.653074  | -2.005908 |
| H  | 1.622403  | 3.514627  | -0.435779 |
| H  | -1.452032 | 2.975104  | -3.266270 |
| H  | 3.315093  | 3.457442  | 0.168538  |
| C  | 2.609319  | 3.047716  | -0.563238 |
| O  | 2.539874  | 1.656462  | -0.309561 |
| C  | 1.770511  | 0.925827  | -1.144949 |
| C  | 2.808994  | -1.103838 | -0.040124 |
| H  | 2.682389  | -2.179753 | 0.083052  |
| O  | 1.162971  | 1.446515  | -2.055600 |
| H  | 2.966156  | 3.249515  | -1.583805 |
| C  | 4.214001  | -0.680569 | -0.055602 |
| H  | 4.415517  | 0.372474  | -0.255851 |
| H  | 6.499266  | 0.875416  | -0.228669 |
| C  | 0.296590  | 6.242682  | 0.126878  |
| C  | -3.798609 | -6.012963 | 0.189616  |
| H  | -3.370769 | -6.455394 | -0.720849 |
| H  | -4.823584 | -6.403187 | 0.297363  |
| H  | -3.220684 | -6.371675 | 1.053388  |
| H  | 0.799708  | 6.388846  | -0.838937 |
| H  | 1.069977  | 6.103996  | 0.898051  |
| H  | -0.242018 | 7.171421  | 0.371804  |

88

Figure\_S8-1\_PA-SIMes-prod(1,4) / electronic energy: -3522.75830146 a.u. / lowest freq: 13.48 cm<sup>-1</sup>

|   |           |           |           |
|---|-----------|-----------|-----------|
| H | -5.825429 | -0.316642 | 0.724633  |
| H | -5.442728 | 2.036732  | 0.553516  |
| C | -5.197072 | -0.046795 | -0.138265 |
| C | -4.891780 | 1.458377  | -0.201541 |
| H | -5.690574 | -0.422785 | -1.045848 |
| N | -3.856879 | -0.633342 | 0.005499  |
| N | -3.448954 | 1.492093  | 0.061409  |
| H | -5.105744 | 1.895632  | -1.189305 |
| H | -4.168207 | -1.229079 | -2.606573 |
| H | -2.997228 | 1.700739  | -2.472762 |
| C | -3.350149 | -1.953510 | -2.482597 |
| C | -2.016724 | 2.179435  | -2.341527 |
| H | -2.401680 | -1.391872 | -2.489470 |
| H | -1.249155 | 1.390415  | -2.283695 |
| H | -3.359366 | -2.634089 | -3.344365 |
| H | 2.543988  | -0.214696 | 2.575835  |
| H | 4.769661  | -2.269795 | 0.727551  |
| C | 5.115470  | -1.254995 | 0.494539  |
| C | 6.581005  | -1.105541 | 0.401263  |
| C | 7.214866  | 0.132813  | 0.199761  |
| H | 6.919153  | -3.219736 | 0.677120  |
| C | 7.391037  | -2.246176 | 0.518541  |
| C | 8.601186  | 0.221529  | 0.113567  |
| H | 9.070838  | 1.195408  | -0.043285 |
| C | 8.779977  | -2.159723 | 0.431914  |
| C | 9.392246  | -0.924188 | 0.228012  |
| H | 9.385697  | -3.064279 | 0.523622  |
| H | 10.479795 | -0.850910 | 0.158490  |
| H | -3.714392 | -2.630294 | 3.408967  |
| H | -4.679253 | -1.385950 | 2.579590  |
| C | -3.736004 | -1.952243 | 2.545893  |
| H | -2.918532 | -1.223604 | 2.659726  |
| H | -3.334271 | -4.627275 | 2.200232  |
| C | -3.592286 | -2.713541 | 1.255268  |

|    |           |           |           |
|----|-----------|-----------|-----------|
| C  | -3.379762 | -4.093211 | 1.246821  |
| H  | -1.243596 | 0.780417  | 2.936262  |
| C  | -3.633263 | -2.041659 | 0.023759  |
| C  | -2.894409 | 0.279713  | 0.135764  |
| C  | -3.225353 | -4.806000 | 0.052466  |
| C  | -0.455290 | 0.499033  | 2.253504  |
| Cu | -0.947355 | 0.016443  | 0.371864  |
| C  | -3.448319 | -2.715899 | -1.190722 |
| C  | -3.261835 | -4.100667 | -1.152352 |
| H  | -0.753835 | -2.982409 | -0.104202 |
| H  | -3.114004 | -4.637851 | -2.093500 |
| C  | -0.006724 | -3.278594 | -0.857666 |
| O  | -0.338979 | -0.769185 | -1.443739 |
| H  | 0.401548  | -4.263917 | -0.603376 |
| C  | 0.832985  | -1.081894 | -1.105230 |
| H  | -0.507860 | -3.325692 | -1.834419 |
| O  | 1.093186  | -2.389004 | -0.879955 |
| C  | 1.898260  | -0.193008 | -0.825177 |
| H  | -2.924338 | 3.511731  | 3.362689  |
| H  | -4.410174 | 3.446368  | 2.397269  |
| C  | -3.373267 | 3.077594  | 2.459276  |
| H  | -3.428468 | 1.986304  | 2.583711  |
| H  | -1.687448 | 5.185627  | 2.133159  |
| C  | -2.591907 | 3.457972  | 1.229629  |
| C  | -1.770068 | 4.584416  | 1.222862  |
| C  | -2.669549 | 2.686509  | 0.057587  |
| C  | -1.039334 | 4.954854  | 0.087136  |
| C  | 0.666880  | 0.267823  | 1.781001  |
| C  | -1.963342 | 3.032080  | -1.103531 |
| C  | -1.153795 | 4.172560  | -1.062276 |
| C  | 2.139173  | 0.218960  | 1.646952  |
| H  | 2.473018  | 1.267286  | 1.603596  |
| H  | -0.588592 | 4.444693  | -1.957556 |
| H  | 1.660936  | 3.824827  | -0.898200 |
| H  | -1.799200 | 2.781603  | -3.234085 |
| H  | 3.418306  | 3.870227  | -0.533784 |
| C  | 2.634735  | 3.353863  | -1.102445 |
| O  | 2.651198  | 2.010211  | -0.676490 |
| C  | 1.807469  | 1.147990  | -1.331279 |
| C  | 2.712456  | -0.533965 | 0.411179  |
| H  | 2.570220  | -1.606366 | 0.594724  |
| O  | 1.117661  | 1.570314  | -2.248160 |
| H  | 2.839642  | 3.441361  | -2.179740 |
| C  | 4.195700  | -0.299517 | 0.308420  |
| H  | 4.495387  | 0.723286  | 0.060734  |
| H  | 6.618107  | 1.043063  | 0.111617  |
| C  | -0.142417 | 6.164922  | 0.120462  |
| C  | -3.034097 | -6.299872 | 0.072676  |
| H  | -2.594655 | -6.663110 | -0.866657 |
| H  | -3.999357 | -6.813365 | 0.209304  |
| H  | -2.380522 | -6.607646 | 0.901704  |
| H  | 0.341200  | 6.334454  | -0.851386 |
| H  | 0.648454  | 6.045565  | 0.877394  |
| H  | -0.707932 | 7.072155  | 0.383217  |

41

Figure\_S8-1\_PPh3-Cu-allenyl / electronic energy: -2791.78064609 a.u. / lowest freq: -8.52 cm<sup>-1</sup>

|    |           |           |           |
|----|-----------|-----------|-----------|
| Cu | 1.925957  | 0.441034  | -0.969324 |
| C  | 3.695423  | 0.782212  | -1.650311 |
| H  | 3.901621  | 1.250294  | -2.626132 |
| C  | 4.739409  | 0.464057  | -0.934464 |
| C  | 5.764894  | 0.124180  | -0.171645 |
| H  | 6.228054  | -0.865398 | -0.246897 |
| H  | 6.190086  | 0.825011  | 0.554818  |
| P  | -0.093017 | 0.040978  | -0.106258 |
| C  | -0.713342 | 1.391986  | 0.957863  |
| C  | -1.380331 | 1.168166  | 2.166791  |
| C  | -0.511650 | 2.705927  | 0.513218  |
| C  | -1.849259 | 2.247854  | 2.915852  |
| H  | -1.535294 | 0.149778  | 2.529631  |
| C  | -0.989950 | 3.780817  | 1.258089  |
| H  | 0.022539  | 2.889678  | -0.423318 |
| C  | -1.658731 | 3.552160  | 2.461671  |
| H  | -2.365753 | 2.066564  | 3.860640  |
| H  | -0.832329 | 4.800736  | 0.901689  |
| H  | -2.027713 | 4.394962  | 3.049984  |
| C  | -0.164393 | -1.456811 | 0.937848  |
| C  | -1.315396 | -2.246691 | 1.042854  |
| C  | 0.979917  | -1.802657 | 1.668371  |
| C  | -1.322993 | -3.362695 | 1.878346  |
| H  | -2.210179 | -1.992779 | 0.469631  |
| C  | 0.967011  | -2.915256 | 2.507351  |
| H  | 1.889455  | -1.202122 | 1.577400  |
| C  | -0.184532 | -3.695898 | 2.612619  |
| H  | -2.223689 | -3.975283 | 1.954422  |
| H  | 1.863220  | -3.177711 | 3.073131  |
| H  | -0.192646 | -4.571265 | 3.265682  |
| C  | -1.410845 | -0.201190 | -1.350523 |
| C  | -2.710237 | 0.290159  | -1.183020 |
| C  | -1.089521 | -0.925749 | -2.506174 |

|   |           |           |           |
|---|-----------|-----------|-----------|
| C | -3.679067 | 0.050420  | -2.157376 |
| H | -2.969562 | 0.864064  | -0.290291 |
| C | -2.061407 | -1.169847 | -3.473746 |
| H | -0.072030 | -1.299724 | -2.651497 |
| C | -3.357069 | -0.680980 | -3.300219 |
| H | -4.690190 | 0.439664  | -2.021497 |
| H | -1.803574 | -1.735870 | -4.371205 |
| H | -4.117079 | -0.866243 | -4.062285 |

73

Figure\_S8-1\_PA-PPh3-ed(1,6) / electronic energy: -3633.73942416 a.u. / lowest freq: 9.87 cm-1

|    |           |           |           |
|----|-----------|-----------|-----------|
| Cu | 0.281127  | -0.053503 | -0.846773 |
| C  | 1.747391  | -1.529250 | -0.714753 |
| C  | 0.588836  | -1.999669 | -0.061364 |
| H  | 1.829657  | -1.802584 | -1.771198 |
| C  | 0.354197  | -2.059542 | 1.408843  |
| C  | -0.330828 | -2.849508 | -0.890855 |
| O  | 1.297654  | -1.450834 | 2.127796  |
| O  | -0.611159 | -2.575542 | 1.922721  |
| O  | -0.783960 | -3.919929 | -0.585523 |
| O  | -0.577977 | -2.256524 | -2.069090 |
| C  | -1.446301 | -2.931626 | -2.970623 |
| H  | -1.072482 | -3.941750 | -3.186193 |
| H  | -1.463328 | -2.329014 | -3.884459 |
| H  | -2.456144 | -2.999963 | -2.541418 |
| C  | 1.128780  | -1.461170 | 3.540320  |
| H  | 0.130316  | -1.096654 | 3.813124  |
| H  | 1.898791  | -0.793655 | 3.941403  |
| H  | 1.265534  | -2.477818 | 3.934981  |
| C  | 2.975644  | -1.008685 | -0.134204 |
| H  | 2.994699  | -0.824010 | 0.937799  |
| C  | 4.043126  | -0.734499 | -0.908877 |
| H  | 3.958501  | -0.914167 | -1.986156 |
| C  | 5.329075  | -0.183872 | -0.465301 |
| C  | 6.312127  | 0.097342  | -1.427631 |
| C  | 5.618499  | 0.093866  | 0.882159  |
| C  | 7.540548  | 0.644594  | -1.061819 |
| H  | 6.103793  | -0.110187 | -2.480445 |
| C  | 6.844840  | 0.637835  | 1.248002  |
| H  | 4.875942  | -0.113132 | 1.655156  |
| C  | 7.811133  | 0.917413  | 0.278113  |
| H  | 8.288975  | 0.859668  | -1.827509 |
| H  | 7.050019  | 0.847539  | 2.300061  |
| H  | 8.771785  | 1.347966  | 0.568665  |
| C  | 1.181260  | 1.180925  | -2.096157 |
| H  | 0.783134  | 1.282091  | -3.119083 |
| C  | 2.198582  | 1.929553  | -1.782244 |
| C  | 3.231333  | 2.660663  | -1.398166 |
| H  | 4.259098  | 2.302851  | -1.522261 |
| P  | 3.092728  | 3.648631  | -0.945463 |
| P  | -1.778404 | 0.578573  | -0.009958 |
| C  | -3.138581 | -0.558840 | -0.463907 |
| C  | -4.029872 | -0.222041 | -1.491377 |
| C  | -3.219543 | -1.829374 | 0.123235  |
| C  | -4.994673 | -1.135348 | -1.914128 |
| H  | -3.974848 | 0.758743  | -1.968050 |
| C  | -4.192331 | -2.734640 | -0.297046 |
| H  | -2.510615 | -2.129396 | 0.898656  |
| C  | -5.082294 | -2.391295 | -1.314762 |
| H  | -5.683842 | -0.859482 | -2.714981 |
| H  | -4.243175 | -3.720411 | 0.169216  |
| H  | -5.840238 | -3.104928 | -1.644543 |
| C  | -2.406943 | 2.227048  | -0.501712 |
| C  | -3.559876 | 2.760352  | 0.093635  |
| C  | -1.733894 | 2.961667  | -1.481188 |
| C  | -4.036701 | 4.007177  | -0.298070 |
| H  | -4.088590 | 2.197203  | 0.867266  |
| C  | -2.214590 | 4.213526  | -1.871669 |
| H  | -0.822358 | 2.560169  | -1.928151 |
| C  | -3.364492 | 4.734849  | -1.284186 |
| H  | -4.935343 | 4.416275  | 0.168252  |
| H  | -1.681839 | 4.782276  | -2.636636 |
| H  | -3.740287 | 5.713899  | -1.589671 |
| C  | -1.751071 | 0.711623  | 1.815504  |
| C  | -0.640075 | 1.373630  | 2.357923  |
| C  | -2.764618 | 0.260964  | 2.666165  |
| C  | -0.554820 | 1.598959  | 3.729062  |
| H  | 0.162880  | 1.721615  | 1.701128  |
| C  | -2.667046 | 0.471611  | 4.041953  |
| H  | -3.636680 | -0.255642 | 2.260443  |
| C  | -1.567675 | 1.143874  | 4.574476  |
| H  | 0.312566  | 2.119024  | 4.140417  |
| H  | -3.460024 | 0.111725  | 4.700695  |
| H  | -1.496606 | 1.310090  | 5.651383  |

73

Figure\_S8-1\_PA-PPh3-ts(1,6) / electronic energy: -3633.72277720 a.u. / lowest freq: -479.99 cm-1

|    |          |           |           |
|----|----------|-----------|-----------|
| Cu | 0.198749 | -0.236268 | -0.925173 |
| C  | 1.749466 | -1.599978 | -0.430970 |
| C  | 0.588754 | -1.994086 | 0.318775  |
| H  | 1.871922 | -2.120579 | -1.386937 |

|   |           |           |           |
|---|-----------|-----------|-----------|
| C | 0.404037  | -1.821507 | 1.768486  |
| C | -0.323579 | -2.962495 | -0.335634 |
| O | 1.433657  | -1.202567 | 2.369883  |
| O | -0.568884 | -2.177646 | 2.401963  |
| O | -0.899563 | -3.896650 | 0.163170  |
| O | -0.469787 | -2.657958 | -1.649806 |
| C | -1.369692 | -3.457994 | -2.399270 |
| H | -1.089009 | -4.519221 | -2.349202 |
| H | -1.309646 | -3.099107 | -3.432499 |
| H | -2.394173 | -3.339246 | -2.016569 |
| C | 1.341079  | -1.039608 | 3.775320  |
| H | 0.395855  | -0.556018 | 4.054868  |
| H | 2.188926  | -0.409032 | 4.066392  |
| H | 1.408575  | -2.013033 | 4.282673  |
| C | 2.811533  | -0.754461 | -0.073616 |
| H | 2.767885  | -0.213880 | 0.870706  |
| C | 3.894421  | -0.560689 | -0.942301 |
| H | 4.032021  | -1.332866 | -1.703710 |
| C | 5.160858  | 0.055805  | -0.473096 |
| C | 6.378094  | -0.357303 | -1.032020 |
| C | 5.185904  | 1.051609  | 0.515827  |
| C | 7.586681  | 0.192652  | -0.606226 |
| H | 6.376836  | -1.127071 | -1.808343 |
| C | 6.391647  | 1.602785  | 0.940475  |
| H | 4.250392  | 1.410349  | 0.951153  |
| C | 7.598668  | 1.174336  | 0.383483  |
| H | 8.523691  | -0.149889 | -1.051028 |
| H | 6.390162  | 2.376659  | 1.711313  |
| H | 8.543190  | 1.608075  | 0.718851  |
| C | 0.868564  | 0.694030  | -2.598198 |
| H | 0.042284  | 1.044823  | -3.218624 |
| C | 2.121484  | 0.839148  | -2.698043 |
| C | 3.472303  | 0.856223  | -2.512279 |
| H | 4.105545  | 0.335045  | -3.235909 |
| H | 3.909716  | 1.766571  | -2.089430 |
| P | -1.765948 | 0.627807  | -0.141156 |
| C | -3.110822 | -0.590768 | -0.356080 |
| C | -3.963397 | -0.528133 | -1.467265 |
| C | -3.193107 | -1.687008 | 0.512354  |
| C | -4.905470 | -1.531620 | -1.686546 |
| H | -3.898390 | 0.307333  | -2.167986 |
| C | -4.139884 | -2.685325 | 0.289351  |
| H | -2.494798 | -1.787833 | 1.347756  |
| C | -5.000810 | -2.608732 | -0.804544 |
| H | -5.568261 | -1.470413 | -2.552342 |
| H | -4.188505 | -3.536397 | 0.971214  |
| H | -5.741320 | -3.392843 | -0.976700 |
| C | -2.416546 | 2.201755  | -0.815496 |
| C | -3.732324 | 2.619499  | -0.569437 |
| C | -1.548319 | 3.045371  | -1.515942 |
| C | -4.175013 | 3.853657  | -1.035935 |
| H | -4.416939 | 1.976659  | -0.010682 |
| C | -1.993003 | 4.285270  | -1.978811 |
| H | -0.516072 | 2.736391  | -1.695677 |
| C | -3.305925 | 4.687420  | -1.743909 |
| H | -5.202749 | 4.168809  | -0.844121 |
| H | -1.308760 | 4.935905  | -2.527150 |
| H | -3.656041 | 5.654844  | -2.110628 |
| C | -1.665616 | 1.019437  | 1.644300  |
| C | -0.457639 | 1.566347  | 2.094510  |
| C | -2.737827 | 0.893232  | 2.533759  |
| C | -0.327593 | 1.996007  | 3.413446  |
| H | 0.389074  | 1.658731  | 1.408093  |
| C | -2.598585 | 1.304976  | 3.857854  |
| H | -3.685017 | 0.465936  | 2.197223  |
| C | -1.397054 | 1.861483  | 4.298220  |
| H | 0.617029  | 2.424515  | 3.754491  |
| H | -3.436092 | 1.194956  | 4.549832  |
| H | -1.292968 | 2.187083  | 5.335388  |

73

Figure\_S8-1\_PA-PPh3-prod(1,6) / electronic energy: -3633.76592730 a.u. / lowest freq: 12.35 cm<sup>-1</sup>

|    |           |           |           |
|----|-----------|-----------|-----------|
| Cu | 0.380581  | -0.033322 | -0.934002 |
| C  | 1.722035  | -1.651233 | -0.267801 |
| C  | 0.758340  | -2.302529 | 0.577495  |
| H  | 1.912496  | -2.212134 | -1.189678 |
| C  | 0.468502  | -1.910106 | 1.944347  |
| C  | 0.043786  | -3.452469 | 0.036169  |
| O  | 1.281315  | -0.918595 | 2.389753  |
| O  | -0.405154 | -2.353534 | 2.671051  |
| O  | -0.609621 | -4.279093 | 0.641526  |
| O  | 0.150269  | -3.535241 | -1.322793 |
| C  | -0.511432 | -4.621488 | -1.935364 |
| H  | -0.146549 | -5.585804 | -1.551308 |
| H  | -0.300961 | -4.545475 | -3.008942 |
| H  | -1.597721 | -4.568301 | -1.766108 |
| C  | 1.084511  | -0.500781 | 3.725312  |
| H  | 0.029082  | -0.266140 | 3.917810  |
| H  | 1.697647  | 0.397875  | 3.862546  |
| H  | 1.406361  | -1.280274 | 4.433113  |



|   |           |           |           |
|---|-----------|-----------|-----------|
| C | 2.419020  | -0.460760 | -0.171625 |
| H | 2.414616  | 0.112586  | 0.756736  |
| C | 3.447047  | -0.096191 | -1.233516 |
| H | 3.693466  | -1.011006 | -1.794585 |
| C | 4.733583  | 0.433678  | -0.629578 |
| C | 5.950445  | -0.219543 | -0.847939 |
| C | 4.729320  | 1.588224  | 0.164868  |
| C | 7.133866  | 0.264717  | -0.288459 |
| H | 5.972143  | -1.124249 | -1.461584 |
| C | 5.908266  | 2.075666  | 0.724609  |
| H | 3.788986  | 2.112906  | 0.356822  |
| C | 7.116802  | 1.414565  | 0.499214  |
| H | 8.074041  | -0.261324 | -0.469000 |
| H | 5.883808  | 2.976370  | 1.342342  |
| H | 8.041445  | 1.795086  | 0.938645  |
| C | 0.543639  | 0.073596  | -3.273270 |
| H | -0.354332 | -0.246818 | -3.774943 |
| C | 1.609210  | 0.463876  | -2.827257 |
| C | 2.890988  | 0.912802  | -2.277362 |
| H | 3.612399  | 1.053092  | -3.098074 |
| H | 2.741414  | 1.899275  | -1.808749 |
| P | -1.590451 | 0.691422  | -0.132096 |
| C | -2.886314 | -0.572473 | -0.398310 |
| C | -3.896905 | -0.393138 | -1.350853 |
| C | -2.781294 | -1.799953 | 0.272419  |
| C | -4.795299 | -1.425328 | -1.622669 |
| H | -3.988598 | 0.553906  | -1.886403 |
| C | -3.683173 | -2.825318 | -0.001825 |
| H | -2.002846 | -1.972458 | 1.020499  |
| C | -4.690042 | -2.642226 | -0.950657 |
| H | -5.579839 | -1.274950 | -2.367459 |
| H | -3.579534 | -3.775950 | 0.524036  |
| H | -5.393323 | -3.449186 | -1.167704 |
| C | -2.268644 | 2.216720  | -0.883710 |
| C | -3.394159 | 2.847089  | -0.334264 |
| C | -1.659625 | 2.763137  | -2.017426 |
| C | -3.907661 | 3.999858  | -0.920076 |
| H | -3.871859 | 2.434324  | 0.557894  |
| C | -2.175880 | 3.920538  | -2.603571 |
| H | -0.774378 | 2.286181  | -2.444535 |
| C | -3.299060 | 4.537403  | -2.056972 |
| H | -4.785411 | 4.483903  | -0.487182 |
| H | -1.694000 | 4.341295  | -3.488399 |
| H | -3.702135 | 5.443400  | -2.514561 |
| C | -1.610302 | 1.113478  | 1.649203  |
| C | -0.631348 | 2.018531  | 2.082268  |
| C | -2.571431 | 0.655514  | 2.553495  |
| C | -0.635356 | 2.485176  | 3.392938  |
| H | 0.134999  | 2.368056  | 1.384240  |
| C | -2.561523 | 1.110957  | 3.873051  |
| H | -3.335625 | -0.055390 | 2.234204  |
| C | -1.603062 | 2.031811  | 4.291392  |
| H | 0.125644  | 3.197263  | 3.718435  |
| H | -3.313890 | 0.745982  | 4.575051  |
| H | -1.603232 | 2.391871  | 5.322367  |

73

Figure\_S8-1\_PA-PPh3-ed(1,4AA) / electronic energy: -3633.73998513 a.u. / lowest freq: 13.71 cm-1

|    |           |           |           |
|----|-----------|-----------|-----------|
| Cu | 0.292922  | -0.071940 | -0.703950 |
| C  | 1.771622  | -1.519561 | -0.625235 |
| C  | 0.659620  | -1.944994 | 0.135255  |
| H  | 1.781977  | -1.871104 | -1.663031 |
| C  | 0.519576  | -1.767996 | 1.608451  |
| C  | -0.274684 | -2.923126 | -0.512045 |
| O  | 1.232688  | -0.732024 | 2.063933  |
| O  | -0.207431 | -2.412977 | 2.325549  |
| O  | -0.656747 | -3.960664 | -0.040039 |
| O  | -0.638800 | -2.492515 | -1.729032 |
| C  | -1.558466 | -3.302307 | -2.450277 |
| H  | -1.155579 | -4.313612 | -2.598304 |
| H  | -1.706180 | -2.807923 | -3.415887 |
| H  | -2.512960 | -3.366267 | -1.907389 |
| C  | 1.088781  | -0.417295 | 3.443753  |
| H  | 0.034369  | -0.220284 | 3.682984  |
| H  | 1.685694  | 0.484997  | 3.610725  |
| H  | 1.456421  | -1.242140 | 4.069729  |
| C  | 3.052969  | -1.021547 | -0.147416 |
| H  | 3.138046  | -0.770362 | 0.908528  |
| C  | 4.089727  | -0.847430 | -0.988099 |
| H  | 3.942646  | -1.085371 | -2.047581 |
| C  | 5.420638  | -0.334486 | -0.640798 |
| C  | 6.371929  | -0.169537 | -1.659894 |
| C  | 5.786369  | 0.014946  | 0.671434  |
| C  | 7.643996  | 0.329336  | -1.383936 |
| H  | 6.105630  | -0.432872 | -2.686926 |
| C  | 7.055260  | 0.511113  | 0.947811  |
| H  | 5.068980  | -0.095218 | 1.486675  |
| C  | 7.990631  | 0.671561  | -0.078014 |
| H  | 8.367309  | 0.450976  | -2.193179 |
| H  | 7.318501  | 0.777216  | 1.973955  |

|   |           |           |           |
|---|-----------|-----------|-----------|
| H | 8.985546  | 1.064495  | 0.142059  |
| C | 1.130899  | 1.451259  | -1.622282 |
| H | 0.687183  | 1.913707  | -2.516722 |
| C | 2.150738  | 2.053340  | -1.080258 |
| C | 3.187517  | 2.610615  | -0.478063 |
| H | 3.053800  | 3.360034  | 0.309780  |
| H | 4.214257  | 2.339508  | -0.746788 |
| P | -1.856790 | 0.500452  | -0.077187 |
| C | -2.532005 | 1.865053  | -1.085743 |
| C | -2.253482 | 1.871561  | -2.457945 |
| C | -3.341211 | 2.868464  | -0.540837 |
| C | -2.787134 | 2.863364  | -3.278585 |
| H | -1.615371 | 1.094423  | -2.886476 |
| C | -3.865483 | 3.865511  | -1.361930 |
| H | -3.560769 | 2.874546  | 0.529464  |
| C | -3.591441 | 3.862565  | -2.730015 |
| H | -2.568137 | 2.859991  | -4.348267 |
| H | -4.492948 | 4.648239  | -0.930632 |
| H | -4.003124 | 4.644878  | -3.371261 |
| C | -1.794821 | 1.179669  | 1.617735  |
| C | -2.707312 | 0.865091  | 2.628939  |
| C | -0.744746 | 2.071822  | 1.885332  |
| C | -2.570152 | 1.436518  | 3.895212  |
| H | -3.528005 | 0.171698  | 2.434488  |
| C | -0.623074 | 2.652655  | 3.144057  |
| H | -0.016721 | 2.309100  | 1.103231  |
| C | -1.533675 | 2.332528  | 4.152693  |
| H | -3.283792 | 1.181941  | 4.681370  |
| H | 0.193458  | 3.349946  | 3.342183  |
| H | -1.431645 | 2.780946  | 5.143197  |
| C | -3.182638 | -0.761732 | -0.106981 |
| C | -4.257484 | -0.676245 | -1.001346 |
| C | -3.066930 | -1.893536 | 0.713197  |
| C | -5.196235 | -1.704960 | -1.075261 |
| H | -4.367967 | 0.194415  | -1.650260 |
| C | -4.011839 | -2.914304 | 0.641664  |
| H | -2.233658 | -1.997528 | 1.411607  |
| C | -5.076697 | -2.825721 | -0.255052 |
| H | -6.026044 | -1.626392 | -1.780776 |
| H | -3.903049 | -3.790276 | 1.283855  |
| H | -5.812993 | -3.629961 | -0.314415 |

73

Figure\_S8-1\_PA-PPh3-ts(1,4AA) / electronic energy: -3633.71057140 a.u. / lowest freq: -331.12 cm<sup>-1</sup>

|    |           |           |           |
|----|-----------|-----------|-----------|
| Cu | -0.060758 | -0.351513 | -0.685955 |
| C  | 1.948711  | -1.078823 | -0.753740 |
| C  | 1.111078  | -1.825647 | 0.210038  |
| H  | 2.172365  | -1.707043 | -1.617088 |
| C  | 0.949156  | -1.426880 | 1.611178  |
| C  | 0.541622  | -3.107630 | -0.215073 |
| O  | 1.225976  | -0.104853 | 1.786875  |
| O  | 0.570723  | -2.106913 | 2.538919  |
| O  | 0.001699  | -3.944107 | 0.476928  |
| O  | 0.639665  | -3.278805 | -1.559884 |
| C  | 0.099282  | -4.477185 | -2.083569 |
| H  | 0.598866  | -5.358609 | -1.656317 |
| H  | 0.267351  | -4.441917 | -3.165968 |
| H  | -0.977923 | -4.550431 | -1.874554 |
| C  | 1.063731  | 0.410156  | 3.096276  |
| H  | 0.002434  | 0.406294  | 3.387569  |
| H  | 1.431310  | 1.441854  | 3.066641  |
| H  | 1.638642  | -0.177696 | 3.825302  |
| C  | 3.141995  | -0.330136 | -0.290307 |
| H  | 2.983680  | 0.420456  | 0.483157  |
| C  | 4.363623  | -0.581554 | -0.779883 |
| H  | 4.470743  | -1.354065 | -1.550378 |
| C  | 5.617541  | 0.080237  | -0.378389 |
| C  | 6.828754  | -0.368767 | -0.927286 |
| C  | 5.660637  | 1.150097  | 0.532565  |
| C  | 8.041971  | 0.222681  | -0.578520 |
| H  | 6.816655  | -1.197335 | -1.640346 |
| C  | 6.870858  | 1.741261  | 0.881612  |
| H  | 4.736776  | 1.530957  | 0.972941  |
| C  | 8.068322  | 1.280512  | 0.328785  |
| H  | 8.970933  | -0.146398 | -1.018903 |
| H  | 6.880983  | 2.570589  | 1.592468  |
| H  | 9.016488  | 1.747365  | 0.603981  |
| C  | 1.233107  | 0.360787  | -2.059009 |
| H  | 1.225046  | -0.072780 | -3.065247 |
| C  | 1.473138  | 1.628108  | -1.869594 |
| C  | 1.758373  | 2.882105  | -1.594225 |
| H  | 0.974981  | 3.643752  | -1.527878 |
| H  | 2.796359  | 3.198381  | -1.446792 |
| P  | -2.103989 | 0.363645  | -0.157475 |
| C  | -2.923582 | 1.422403  | -1.397135 |
| C  | -2.647020 | 1.187286  | -2.749281 |
| C  | -3.810382 | 2.446272  | -1.040545 |
| C  | -3.266973 | 1.952959  | -3.735356 |
| H  | -1.934775 | 0.407367  | -3.031882 |
| C  | -4.424990 | 3.213404  | -2.028300 |

|   |           |           |           |
|---|-----------|-----------|-----------|
| H | -4.017723 | 2.648349  | 0.013268  |
| C | -4.156387 | 2.965197  | -3.375111 |
| H | -3.047897 | 1.764186  | -4.788171 |
| H | -5.115963 | 4.009762  | -1.744506 |
| H | -4.637631 | 3.569037  | -4.147435 |
| C | -1.964208 | 1.430194  | 1.321732  |
| C | -2.715501 | 1.232024  | 2.483238  |
| C | -1.026280 | 2.471610  | 1.272941  |
| C | -2.535204 | 2.073932  | 3.582600  |
| H | -3.442264 | 0.418692  | 2.537372  |
| C | -0.859423 | 3.316248  | 2.365565  |
| H | -0.413941 | 2.617687  | 0.378434  |
| C | -1.612997 | 3.116973  | 3.524158  |
| H | -3.121111 | 1.910679  | 4.489354  |
| H | -0.127093 | 4.124782  | 2.318492  |
| H | -1.475593 | 3.774221  | 4.385326  |
| C | -3.317053 | -0.924484 | 0.288970  |
| C | -4.692018 | -0.780648 | 0.068213  |
| C | -2.830378 | -2.091514 | 0.893694  |
| C | -5.570803 | -1.790853 | 0.456599  |
| H | -5.082836 | 0.119493  | -0.410934 |
| C | -3.713898 | -3.096056 | 1.284117  |
| H | -1.760360 | -2.230081 | 1.067406  |
| C | -5.083546 | -2.947611 | 1.065818  |
| H | -6.641852 | -1.672441 | 0.280189  |
| H | -3.322113 | -4.000918 | 1.752444  |
| H | -5.774756 | -3.737527 | 1.367515  |

73

Figure\_S8-1\_PA-PPh3-prod(1,4AA) / electronic energy: -3633.75762400 a.u. / lowest freq: 9.15 cm-1

|    |           |           |           |
|----|-----------|-----------|-----------|
| Cu | -0.328106 | 0.746986  | 0.828306  |
| C  | 2.133387  | 1.571345  | 1.011669  |
| C  | 1.156139  | 1.920957  | -0.151987 |
| H  | 2.681108  | 2.489291  | 1.264505  |
| C  | 1.149075  | 1.201104  | -1.424216 |
| C  | 0.606846  | 3.271711  | -0.154731 |
| O  | 1.556070  | -0.092184 | -1.285143 |
| O  | 0.798032  | 1.611597  | -2.512247 |
| O  | -0.126523 | 3.786713  | -0.979138 |
| O  | 0.962073  | 3.965342  | 0.965190  |
| C  | 0.399619  | 5.252938  | 1.113332  |
| H  | 0.687826  | 5.914470  | 0.283492  |
| H  | 0.788437  | 5.653242  | 2.057210  |
| H  | -0.698989 | 5.205590  | 1.153308  |
| C  | 1.652766  | -0.854103 | -2.470889 |
| H  | 0.665297  | -0.994627 | -2.935506 |
| H  | 2.060863  | -1.828627 | -2.178731 |
| H  | 2.321756  | -0.372486 | -3.198994 |
| C  | 3.147500  | 0.494457  | 0.752679  |
| H  | 2.783190  | -0.535388 | 0.768502  |
| C  | 4.442598  | 0.738083  | 0.523306  |
| H  | 4.798770  | 1.775139  | 0.544191  |
| C  | 5.467274  | -0.285165 | 0.240255  |
| C  | 6.825804  | 0.031025  | 0.395871  |
| C  | 5.135041  | -1.579815 | -0.193842 |
| C  | 7.818211  | -0.917002 | 0.151601  |
| H  | 7.105497  | 1.037356  | 0.719303  |
| C  | 6.125010  | -2.527653 | -0.438042 |
| H  | 4.087736  | -1.840890 | -0.360886 |
| C  | 7.471833  | -2.202743 | -0.262987 |
| H  | 8.868920  | -0.649702 | 0.285450  |
| H  | 5.844386  | -3.527279 | -0.778200 |
| H  | 8.247148  | -2.946776 | -0.458402 |
| C  | 1.242950  | 1.244467  | 2.221601  |
| H  | 0.855208  | 2.116356  | 2.764369  |
| C  | 0.856887  | 0.035056  | 2.628376  |
| C  | 0.635796  | -1.130533 | 3.190538  |
| H  | -0.213228 | -1.761876 | 2.913476  |
| H  | 1.309009  | -1.497836 | 3.972687  |
| P  | -2.086669 | -0.420265 | 0.115175  |
| C  | -3.081471 | -1.283739 | 1.381264  |
| C  | -3.186601 | -0.692434 | 2.646639  |
| C  | -3.737521 | -2.495151 | 1.130310  |
| C  | -3.953215 | -1.294100 | 3.642719  |
| H  | -2.657433 | 0.241583  | 2.856118  |
| C  | -4.497620 | -3.098932 | 2.130901  |
| H  | -3.649805 | -2.973854 | 0.152010  |
| C  | -4.609035 | -2.498285 | 3.385225  |
| H  | -4.031479 | -0.825041 | 4.625512  |
| H  | -5.003685 | -4.045402 | 1.930060  |
| H  | -5.203382 | -2.974559 | 4.167864  |
| C  | -1.571429 | -1.749892 | -1.028949 |
| C  | -2.099932 | -1.889510 | -2.315016 |
| C  | -0.592483 | -2.648638 | -0.582645 |
| C  | -1.661794 | -2.925287 | -3.142350 |
| H  | -2.853753 | -1.187560 | -2.677481 |
| C  | -0.167328 | -3.687155 | -1.404940 |
| H  | -0.151900 | -2.532309 | 0.411327  |
| C  | -0.701754 | -3.826779 | -2.687522 |
| H  | -2.078411 | -3.026823 | -4.146491 |

|   |           |           |           |
|---|-----------|-----------|-----------|
| H | 0.592955  | -4.385142 | -1.048479 |
| H | -0.361982 | -4.636787 | -3.336295 |
| C | -3.262350 | 0.605138  | -0.831107 |
| C | -4.623284 | 0.293246  | -0.941872 |
| C | -2.751429 | 1.736485  | -1.481686 |
| C | -5.463271 | 1.101444  | -1.705673 |
| H | -5.032403 | -0.581153 | -0.430491 |
| C | -3.596677 | 2.537605  | -2.248014 |
| H | -1.694897 | 2.009711  | -1.395329 |
| C | -4.950265 | 2.222264  | -2.360781 |
| H | -6.524148 | 0.856291  | -1.788541 |
| H | -3.189592 | 3.417618  | -2.749523 |
| H | -5.610788 | 2.854665  | -2.958078 |

73

Figure\_S8-1\_PA-PPh3-ed(1,4) / electronic energy: -3633.73304715 a.u. / lowest freq: 9.83 cm-1

|    |            |           |           |
|----|------------|-----------|-----------|
| Cu | 1.216847   | -0.846142 | 1.178089  |
| C  | -3.520908  | 0.996171  | 0.031632  |
| C  | -2.272892  | 0.470946  | 0.079803  |
| H  | -3.593024  | 2.084698  | 0.110145  |
| C  | -1.970630  | -0.986758 | -0.062205 |
| C  | -1.087404  | 1.346865  | 0.249682  |
| O  | -2.770238  | -1.751449 | 0.671388  |
| O  | -1.103528  | -1.430186 | -0.777015 |
| O  | 0.051328   | 0.946351  | 0.378039  |
| O  | -1.376038  | 2.641451  | 0.261720  |
| C  | -0.285042  | 3.533714  | 0.470471  |
| H  | 0.158356   | 3.373927  | 1.462993  |
| H  | -0.703085  | 4.542748  | 0.397286  |
| H  | 0.494514   | 3.382590  | -0.289659 |
| C  | -2.498264  | -3.147774 | 0.666935  |
| H  | -2.557444  | -3.556015 | -0.351270 |
| H  | -3.259156  | -3.605788 | 1.307067  |
| H  | -1.495668  | -3.325776 | 1.080473  |
| C  | -4.769014  | 0.285351  | -0.133825 |
| H  | -4.732808  | -0.801463 | -0.221143 |
| C  | -5.946720  | 0.943879  | -0.167667 |
| H  | -5.928566  | 2.034530  | -0.060316 |
| C  | -7.279488  | 0.353312  | -0.332263 |
| C  | -8.401195  | 1.198512  | -0.317526 |
| C  | -7.485330  | -1.026980 | -0.506066 |
| C  | -9.687352  | 0.685375  | -0.470249 |
| H  | -8.258602  | 2.273597  | -0.182155 |
| C  | -8.768905  | -1.538937 | -0.659221 |
| H  | -6.635677  | -1.712180 | -0.523412 |
| C  | -9.874961  | -0.685292 | -0.642068 |
| H  | -10.546006 | 1.359878  | -0.455514 |
| H  | -8.910407  | -2.613154 | -0.794566 |
| H  | -10.881332 | -1.091702 | -0.763354 |
| C  | 0.190479   | -1.608257 | 2.652621  |
| H  | 0.393294   | -2.563670 | 3.161730  |
| C  | -0.826447  | -0.922208 | 3.094514  |
| C  | -1.854601  | -0.177922 | 3.474604  |
| H  | -1.754827  | 0.584648  | 4.254481  |
| H  | -2.838514  | -0.310934 | 3.012655  |
| P  | 2.983611   | -0.244506 | -0.068752 |
| C  | 4.610869   | -0.839005 | 0.520204  |
| C  | 5.801450   | -0.126396 | 0.327588  |
| C  | 4.648008   | -2.070043 | 1.186329  |
| C  | 7.011990   | -0.648541 | 0.780671  |
| H  | 5.782875   | 0.844559  | -0.173784 |
| C  | 5.859928   | -2.593727 | 1.633471  |
| H  | 3.714871   | -2.611457 | 1.365523  |
| C  | 7.043108   | -1.883502 | 1.430125  |
| H  | 7.936435   | -0.087611 | 0.627775  |
| H  | 5.878318   | -3.554840 | 2.151424  |
| H  | 7.992134   | -2.289746 | 1.786925  |
| C  | 3.171951   | 1.580338  | -0.080173 |
| C  | 3.236670   | 2.340804  | -1.250897 |
| C  | 3.196521   | 2.231298  | 1.161126  |
| C  | 3.333460   | 3.732526  | -1.180935 |
| H  | 3.208498   | 1.850799  | -2.226320 |
| C  | 3.304185   | 3.617083  | 1.229589  |
| H  | 3.126222   | 1.649342  | 2.084516  |
| C  | 3.370876   | 4.372100  | 0.056351  |
| H  | 3.381992   | 4.316535  | -2.102596 |
| H  | 3.327170   | 4.112041  | 2.202733  |
| H  | 3.449926   | 5.460114  | 0.109514  |
| C  | 2.932820   | -0.694341 | -1.841952 |
| C  | 4.079867   | -0.903930 | -2.617110 |
| C  | 1.667850   | -0.798021 | -2.435898 |
| C  | 3.962946   | -1.199909 | -3.974447 |
| H  | 5.070759   | -0.838591 | -2.162463 |
| C  | 1.556770   | -1.087562 | -3.795483 |
| H  | 0.765299   | -0.669331 | -1.831849 |
| C  | 2.702233   | -1.287455 | -4.566103 |
| H  | 4.862431   | -1.364605 | -4.571540 |
| H  | 0.567679   | -1.168576 | -4.251517 |
| H  | 2.612442   | -1.518472 | -5.629910 |

73

Figure\_S8-1\_PA-PPh3-ts(1,4) / electronic energy: -3633.70950892 a.u. / lowest freq: -429.98 cm<sup>-1</sup>

|    |            |           |           |
|----|------------|-----------|-----------|
| Cu | 0.553150   | -0.020871 | -0.228599 |
| C  | -3.272739  | -0.937299 | -0.059909 |
| C  | -2.084270  | -0.725732 | 0.667208  |
| H  | -3.448463  | -1.986999 | -0.299887 |
| C  | -1.564989  | 0.592937  | 0.997294  |
| C  | -1.177993  | -1.861902 | 0.840900  |
| O  | -2.354236  | 1.601812  | 0.602133  |
| O  | -0.497917  | 0.834534  | 1.568585  |
| O  | 0.027571   | -1.798351 | 1.063222  |
| O  | -1.775148  | -3.050686 | 0.707987  |
| C  | -0.938960  | -4.197147 | 0.743871  |
| H  | -0.166388  | -4.143564 | -0.036190 |
| H  | -1.594908  | -5.056204 | 0.566631  |
| H  | -0.447712  | -4.294010 | 1.721832  |
| C  | -1.852558  | 2.914628  | 0.787539  |
| H  | -1.676840  | 3.126643  | 1.851151  |
| H  | -2.616452  | 3.591394  | 0.389447  |
| H  | -0.908657  | 3.048142  | 0.238697  |
| C  | -4.505864  | -0.156829 | 0.045175  |
| H  | -4.421737  | 0.871522  | 0.394822  |
| C  | -5.703943  | -0.694631 | -0.249414 |
| H  | -5.733610  | -1.728917 | -0.612847 |
| C  | -7.012993  | -0.034003 | -0.139737 |
| C  | -8.161476  | -0.726524 | -0.556909 |
| C  | -7.172916  | 1.267253  | 0.369358  |
| C  | -9.424270  | -0.142775 | -0.474750 |
| H  | -8.058031  | -1.739424 | -0.955028 |
| C  | -8.433182  | 1.850000  | 0.453125  |
| H  | -6.302612  | 1.831674  | 0.710013  |
| C  | -9.565499  | 1.148579  | 0.031261  |
| H  | -10.302655 | -0.700597 | -0.806910 |
| H  | -8.535543  | 2.860444  | 0.855229  |
| H  | -10.553485 | 1.608791  | 0.100220  |
| C  | -0.289689  | 0.046288  | -2.080282 |
| H  | 0.465779   | 0.296943  | -2.830825 |
| C  | -1.523554  | -0.186112 | -2.268724 |
| C  | -2.856598  | -0.460194 | -2.224379 |
| H  | -3.208638  | -1.427481 | -2.596028 |
| H  | -3.558396  | 0.371779  | -2.327657 |
| P  | 2.794168   | 0.211327  | -0.074117 |
| C  | 3.587553   | 0.894249  | -1.576060 |
| C  | 4.767881   | 0.382603  | -2.126124 |
| C  | 2.957509   | 1.983061  | -2.195040 |
| C  | 5.315637   | 0.959554  | -3.272420 |
| H  | 5.263296   | -0.472459 | -1.660870 |
| C  | 3.511358   | 2.564118  | -3.333516 |
| H  | 2.022910   | 2.374932  | -1.783028 |
| C  | 4.691630   | 2.051383  | -3.874656 |
| H  | 6.235342   | 0.551240  | -3.696809 |
| H  | 3.015332   | 3.414820  | -3.805501 |
| H  | 5.122377   | 2.501147  | -4.771799 |
| C  | 3.620777   | -1.402620 | 0.176547  |
| C  | 4.794667   | -1.557949 | 0.922293  |
| C  | 3.033031   | -2.525884 | -0.420637 |
| C  | 5.378673   | -2.817339 | 1.057610  |
| H  | 5.256285   | -0.692775 | 1.403745  |
| C  | 3.621314   | -3.781727 | -0.289828 |
| H  | 2.101266   | -2.416229 | -0.981915 |
| C  | 4.795448   | -3.928931 | 0.449824  |
| H  | 6.294768   | -2.929437 | 1.641369  |
| H  | 3.155584   | -4.650921 | -0.759117 |
| H  | 5.253807   | -4.914254 | 0.559081  |
| C  | 3.424954   | 1.262744  | 1.282410  |
| C  | 4.606769   | 2.008582  | 1.195282  |
| C  | 2.672915   | 1.291711  | 2.464589  |
| C  | 5.040033   | 2.761759  | 2.285959  |
| H  | 5.191962   | 2.003513  | 0.272358  |
| C  | 3.114165   | 2.039904  | 3.554692  |
| H  | 1.729938   | 0.741610  | 2.519597  |
| C  | 4.297516   | 2.773830  | 3.467289  |
| H  | 5.963194   | 3.340649  | 2.212196  |
| H  | 2.525155   | 2.057191  | 4.474228  |
| H  | 4.639079   | 3.364213  | 4.320461  |

73

Figure\_S8-1\_PA-PPh3-prod(1,4) / electronic energy: -3633.77054729 a.u. / lowest freq: 12.47 cm<sup>-1</sup>

|    |           |           |           |
|----|-----------|-----------|-----------|
| Cu | 0.938058  | 0.045923  | -1.169917 |
| C  | -3.204642 | 0.129519  | 0.977202  |
| C  | -2.090513 | 0.104502  | -0.059086 |
| H  | -3.283250 | 1.169922  | 1.314879  |
| C  | -1.569802 | -1.120825 | -0.549202 |
| C  | -1.506614 | 1.327093  | -0.482179 |
| O  | -2.295885 | -2.202340 | -0.200855 |
| O  | -0.546329 | -1.314239 | -1.242076 |
| O  | -0.473449 | 1.489539  | -1.171331 |
| O  | -2.160457 | 2.433051  | -0.077853 |
| C  | -1.580946 | 3.685967  | -0.383152 |
| H  | -0.602108 | 3.803398  | 0.106008  |
| H  | -2.275562 | 4.442122  | 0.000612  |

|   |            |           |           |
|---|------------|-----------|-----------|
| H | -1.449926  | 3.816306  | -1.466407 |
| C | -1.777532  | -3.476038 | -0.531825 |
| H | -1.656920  | -3.591623 | -1.617929 |
| H | -2.505608  | -4.205777 | -0.159283 |
| H | -0.803978  | -3.644818 | -0.048236 |
| C | -4.547370  | -0.260085 | 0.416073  |
| H | -4.603170  | -1.262291 | -0.022381 |
| C | -5.616645  | 0.546452  | 0.418310  |
| H | -5.509546  | 1.541085  | 0.868458  |
| C | -6.953531  | 0.256294  | -0.134887 |
| C | -7.966512  | 1.219692  | -0.006646 |
| C | -7.267971  | -0.944966 | -0.793741 |
| C | -9.245786  | 0.996907  | -0.514363 |
| H | -7.743731  | 2.162469  | 0.500412  |
| C | -8.544397  | -1.169502 | -1.301127 |
| H | -6.503781  | -1.715499 | -0.915762 |
| C | -9.540964  | -0.200178 | -1.164754 |
| H | -10.015123 | 1.764409  | -0.402081 |
| H | -8.763923  | -2.110761 | -1.810443 |
| H | -10.540752 | -0.377954 | -1.566911 |
| C | -0.365120  | -0.357490 | 3.082301  |
| H | 0.661941   | -0.238301 | 3.381646  |
| C | -1.512065  | -0.514496 | 2.726392  |
| C | -2.879945  | -0.712184 | 2.244164  |
| H | -3.596579  | -0.446898 | 3.038044  |
| H | -3.023314  | -1.781742 | 2.031145  |
| P | 2.965343   | 0.022589  | -0.371393 |
| C | 2.888281   | -0.928025 | 1.194525  |
| C | 3.498444   | -0.515589 | 2.383660  |
| C | 2.153803   | -2.122487 | 1.175697  |
| C | 3.388064   | -1.297432 | 3.535063  |
| H | 4.058491   | 0.421291  | 2.418882  |
| C | 2.057528   | -2.907287 | 2.321592  |
| H | 1.637011   | -2.427056 | 0.261125  |
| C | 2.674759   | -2.495404 | 3.503617  |
| H | 3.863625   | -0.966328 | 4.460574  |
| H | 1.483499   | -3.835819 | 2.296380  |
| H | 2.589523   | -3.103955 | 4.406325  |
| C | 3.596219   | 1.670552  | 0.112068  |
| C | 4.954670   | 1.938943  | 0.319953  |
| C | 2.653748   | 2.689412  | 0.301513  |
| C | 5.361561   | 3.207678  | 0.730178  |
| H | 5.700609   | 1.156354  | 0.160225  |
| C | 3.063399   | 3.955326  | 0.717140  |
| H | 1.595526   | 2.491252  | 0.107057  |
| C | 4.416698   | 4.214503  | 0.933572  |
| H | 6.422396   | 3.410659  | 0.890834  |
| H | 2.321960   | 4.743808  | 0.863405  |
| H | 4.738641   | 5.207651  | 1.254544  |
| C | 4.342130   | -0.735986 | -1.303767 |
| C | 5.324046   | -1.531856 | -0.703051 |
| C | 4.407301   | -0.481692 | -2.680032 |
| C | 6.364736   | -2.056088 | -1.469817 |
| H | 5.276727   | -1.746348 | 0.367199  |
| C | 5.451575   | -1.000472 | -3.442027 |
| H | 3.632460   | 0.124264  | -3.158121 |
| C | 6.431655   | -1.788693 | -2.836890 |
| H | 7.126634   | -2.677826 | -0.995041 |
| H | 5.496534   | -0.796208 | -4.513735 |
| H | 7.247235   | -2.200858 | -3.434873 |

24

Figure\_S9-1\_Me2NHC-Cu-allenyl / electronic energy: -2062.03073671 a.u. / lowest freq: 16.19 cm-1

|    |           |           |           |
|----|-----------|-----------|-----------|
| C  | 2.918206  | 1.315894  | 0.091326  |
| H  | 3.172197  | 1.838768  | 1.027814  |
| C  | 3.315499  | -0.166410 | 0.114484  |
| H  | 3.900547  | -0.463518 | -0.771327 |
| C  | 0.986753  | 0.001938  | -0.023023 |
| Cu | -0.888943 | -0.488741 | -0.126170 |
| N  | 1.467261  | 1.248504  | -0.070934 |
| N  | 2.017665  | -0.838526 | 0.111392  |
| H  | 3.894306  | -0.441143 | 1.009295  |
| H  | 3.378330  | 1.869933  | -0.740626 |
| C  | -2.762590 | -0.927759 | -0.229714 |
| H  | -3.145854 | -1.915697 | -0.535398 |
| C  | -3.673890 | -0.041198 | 0.066597  |
| C  | -4.559952 | 0.891767  | 0.375842  |
| H  | -4.957585 | 1.574386  | -0.383123 |
| H  | -4.930838 | 1.010617  | 1.399723  |
| C  | 0.676712  | 2.451280  | -0.144453 |
| H  | -0.378542 | 2.179900  | -0.275011 |
| H  | 0.779042  | 3.047038  | 0.777227  |
| H  | 0.992071  | 3.072048  | -0.997685 |
| C  | 1.929271  | -2.276075 | 0.147590  |
| H  | 2.401143  | -2.673321 | 1.059948  |
| H  | 0.871323  | -2.567362 | 0.139575  |
| H  | 2.428683  | -2.724632 | -0.726592 |

56

Figure\_S9-1\_PA-Me2NHC-ed(1,6) / electronic energy: -2903.98097792 a.u. / lowest freq: 19.51 cm-1

|   |           |           |          |
|---|-----------|-----------|----------|
| C | -4.384922 | -1.833221 | 0.636783 |
|---|-----------|-----------|----------|

|    |           |           |           |
|----|-----------|-----------|-----------|
| H  | -4.634841 | -1.919709 | -0.434322 |
| C  | -3.396733 | -2.910945 | 1.085904  |
| H  | -3.620704 | -3.300003 | 2.094154  |
| C  | -2.315108 | -0.845625 | 1.021657  |
| Cu | -0.754442 | 0.400416  | 0.861053  |
| N  | -3.617773 | -0.607663 | 0.857217  |
| N  | -2.136199 | -2.169597 | 1.104980  |
| C  | 0.458577  | 1.102813  | -0.669229 |
| C  | -0.825033 | 0.799053  | -1.182082 |
| H  | -3.345735 | -3.764056 | 0.394266  |
| H  | -5.319672 | -1.831842 | 1.214585  |
| H  | 0.629788  | 2.161898  | -0.456390 |
| C  | -1.282062 | -0.482972 | -1.782620 |
| C  | -1.748429 | 1.959468  | -1.383138 |
| O  | -0.331398 | -1.426356 | -1.807512 |
| O  | -2.408721 | -0.701012 | -2.161206 |
| O  | -2.496581 | 2.122085  | -2.312535 |
| O  | -1.631377 | 2.852968  | -0.386812 |
| C  | -2.395555 | 4.044603  | -0.500390 |
| H  | -2.153759 | 4.575544  | -1.431465 |
| H  | -2.131647 | 4.659261  | 0.366416  |
| H  | -3.471313 | 3.817839  | -0.489057 |
| C  | -0.737671 | -2.717016 | -2.235770 |
| H  | -1.549397 | -3.095191 | -1.597533 |
| H  | 0.145090  | -3.359466 | -2.148304 |
| H  | -1.087121 | -2.693518 | -3.277124 |
| C  | 1.665843  | 0.292477  | -0.691683 |
| H  | 1.560309  | -0.775100 | -0.878865 |
| C  | 2.876382  | 0.842661  | -0.466763 |
| H  | 2.933432  | 1.922101  | -0.299843 |
| C  | 4.161125  | 0.132326  | -0.413819 |
| C  | 5.328890  | 0.864632  | -0.142998 |
| C  | 4.281125  | -1.254307 | -0.613340 |
| C  | 6.571658  | 0.239466  | -0.071457 |
| H  | 5.253546  | 1.942951  | 0.019716  |
| C  | 5.522243  | -1.879393 | -0.544270 |
| H  | 3.394247  | -1.854979 | -0.825154 |
| C  | 6.673665  | -1.136738 | -0.272331 |
| H  | 7.465299  | 0.829591  | 0.143556  |
| H  | 5.593945  | -2.957719 | -0.703045 |
| H  | 7.645849  | -1.631020 | -0.216002 |
| C  | 0.277032  | 0.715208  | 2.515883  |
| H  | -0.177368 | 0.372549  | 3.458611  |
| C  | 1.438197  | 1.294250  | 2.594390  |
| C  | 2.630056  | 1.867868  | 2.597096  |
| H  | 2.744436  | 2.952595  | 2.693779  |
| H  | 3.543595  | 1.270274  | 2.508963  |
| C  | -0.896335 | -2.826193 | 1.439286  |
| H  | -0.966288 | -3.314241 | 2.425237  |
| H  | -0.645738 | -3.592509 | 0.689815  |
| H  | -0.091466 | -2.080819 | 1.472981  |
| C  | -4.178084 | 0.676200  | 0.515223  |
| H  | -3.498587 | 1.465849  | 0.859017  |
| H  | -4.313528 | 0.770007  | -0.574744 |
| H  | -5.150326 | 0.809319  | 1.011360  |

56

Figure\_S9-1\_PA-Me2NHC-ts(1,6) / electronic energy: -2903.96575719 a.u. / lowest freq: -471.62 cm-1

|    |           |           |           |
|----|-----------|-----------|-----------|
| C  | -4.301112 | 2.032828  | -0.371878 |
| H  | -4.571488 | 1.961864  | 0.695532  |
| C  | -3.288722 | 3.148626  | -0.639327 |
| H  | -3.490986 | 3.685300  | -1.582436 |
| C  | -2.239770 | 1.079936  | -0.874459 |
| Cu | -0.760725 | -0.252397 | -0.886773 |
| N  | -3.548263 | 0.840817  | -0.761811 |
| N  | -2.039399 | 2.397064  | -0.751014 |
| C  | 0.452714  | -1.302516 | 0.502281  |
| C  | -0.843682 | -1.107458 | 1.090820  |
| H  | -3.236749 | 3.890062  | 0.170703  |
| H  | -5.225239 | 2.134476  | -0.957761 |
| H  | 0.595381  | -2.302888 | 0.082396  |
| C  | -1.273573 | 0.054490  | 1.882644  |
| C  | -1.782786 | -2.249062 | 1.041641  |
| O  | -0.308955 | 0.991991  | 2.005414  |
| O  | -2.378969 | 0.236835  | 2.347080  |
| O  | -2.654468 | -2.517759 | 1.834224  |
| O  | -1.571676 | -3.019660 | -0.053244 |
| C  | -2.369748 | -4.183342 | -0.173806 |
| H  | -2.233009 | -4.848748 | 0.690658  |
| H  | -2.041150 | -4.686951 | -1.089626 |
| H  | -3.435573 | -3.923518 | -0.251563 |
| C  | -0.687268 | 2.202882  | 2.631758  |
| H  | -1.534403 | 2.667664  | 2.105615  |
| H  | 0.189645  | 2.858973  | 2.586407  |
| H  | -0.974869 | 2.035658  | 3.679480  |
| C  | 1.602817  | -0.494489 | 0.508312  |
| H  | 1.556658  | 0.499294  | 0.950224  |
| C  | 2.780564  | -0.934008 | -0.111858 |
| H  | 2.860946  | -2.013343 | -0.266441 |
| C  | 4.081394  | -0.263187 | 0.134830  |

|   |           |           |           |
|---|-----------|-----------|-----------|
| C | 5.262746  | -1.017886 | 0.122834  |
| C | 4.177701  | 1.117971  | 0.368059  |
| C | 6.501064  | -0.418052 | 0.349020  |
| H | 5.207333  | -2.093988 | -0.062594 |
| C | 5.413377  | 1.718392  | 0.592760  |
| H | 3.275313  | 1.733931  | 0.358727  |
| C | 6.582009  | 0.953416  | 0.585937  |
| H | 7.408041  | -1.027069 | 0.339879  |
| H | 5.467285  | 2.794965  | 0.770473  |
| H | 7.550574  | 1.426776  | 0.760668  |
| C | 0.185865  | -0.329639 | -2.673419 |
| H | -0.508009 | -0.140783 | -3.492916 |
| C | 1.435581  | -0.518562 | -2.627011 |
| C | 2.740753  | -0.662004 | -2.255467 |
| H | 3.253117  | -1.600302 | -2.488872 |
| H | 3.370473  | 0.231354  | -2.311395 |
| C | -0.780147 | 3.070632  | -0.945376 |
| H | -0.791802 | 3.674418  | -1.868013 |
| H | -0.562730 | 3.737046  | -0.096530 |
| H | 0.017585  | 2.321229  | -1.023908 |
| C | -4.125134 | -0.472054 | -0.600064 |
| H | -3.443960 | -1.217090 | -1.030870 |
| H | -4.273472 | -0.706182 | 0.466258  |
| H | -5.089587 | -0.530538 | -1.125066 |

56

Figure\_S9-1\_PA-Me2NHC-prod(1,6) / electronic energy: -2904.01565681 a.u. / lowest freq: 26.64 cm-1

|    |           |           |           |
|----|-----------|-----------|-----------|
| C  | 4.371510  | -0.111585 | 0.084988  |
| H  | 4.286227  | 0.682804  | 0.845097  |
| C  | 4.279979  | -1.509608 | 0.698378  |
| H  | 4.983362  | -2.225255 | 0.237684  |
| C  | 2.327692  | -1.062877 | -0.504951 |
| Cu | 0.429279  | -1.229565 | -1.024010 |
| N  | 3.183831  | -0.076114 | -0.769086 |
| N  | 2.902625  | -1.884630 | 0.386285  |
| C  | -0.528954 | 0.936944  | -0.157397 |
| C  | 0.497628  | 1.602406  | 0.580246  |
| H  | 4.454641  | -1.513205 | 1.784302  |
| H  | 5.289475  | 0.047534  | -0.498020 |
| H  | -0.837213 | 1.513492  | -1.036173 |
| C  | 1.185447  | 1.020309  | 1.716635  |
| C  | 0.972356  | 2.888037  | 0.093204  |
| O  | 0.628405  | -0.160892 | 2.106127  |
| O  | 2.170869  | 1.438129  | 2.299742  |
| O  | 1.820850  | 3.608486  | 0.586299  |
| O  | 0.363511  | 3.273521  | -1.068856 |
| C  | 0.773567  | 4.510704  | -1.607237 |
| H  | 0.585703  | 5.337438  | -0.905934 |
| H  | 0.187524  | 4.660953  | -2.522037 |
| H  | 1.846789  | 4.507482  | -1.852570 |
| C  | 1.253526  | -0.819427 | 3.183828  |
| H  | 2.316980  | -1.007583 | 2.974810  |
| H  | 0.725629  | -1.772181 | 3.313891  |
| H  | 1.186296  | -0.229904 | 4.110676  |
| C  | -1.225788 | -0.249657 | -0.002683 |
| H  | -1.137404 | -0.812557 | 0.930623  |
| C  | -2.465696 | -0.528764 | -0.856109 |
| H  | -2.403067 | 0.119456  | -1.745797 |
| C  | -3.755980 | -0.212966 | -0.135274 |
| C  | -4.654300 | 0.725267  | -0.653044 |
| C  | -4.078312 | -0.848095 | 1.071869  |
| C  | -5.843985 | 1.023505  | 0.013960  |
| H  | -4.418363 | 1.232924  | -1.592373 |
| C  | -5.264618 | -0.555090 | 1.740307  |
| H  | -3.387898 | -1.578360 | 1.503117  |
| C  | -6.153552 | 0.383370  | 1.212653  |
| H  | -6.531456 | 1.761435  | -0.406075 |
| H  | -5.495425 | -1.059042 | 2.681668  |
| H  | -7.083606 | 0.615250  | 1.736302  |
| C  | -0.067275 | -2.725793 | -2.413815 |
| H  | 0.690820  | -3.232849 | -2.989905 |
| C  | -1.117478 | -2.324599 | -1.909019 |
| C  | -2.441626 | -1.986832 | -1.361402 |
| H  | -3.223686 | -2.164619 | -2.116075 |
| H  | -2.639817 | -2.678016 | -0.525564 |
| C  | 2.369352  | -3.150503 | 0.817441  |
| H  | 2.890919  | -3.993151 | 0.331973  |
| H  | 2.474759  | -3.261221 | 1.906981  |
| H  | 1.302961  | -3.203375 | 0.563303  |
| C  | 2.949860  | 1.048950  | -1.638257 |
| H  | 1.917888  | 1.018441  | -2.007548 |
| H  | 3.096010  | 1.988731  | -1.084909 |
| H  | 3.643872  | 1.031831  | -2.493951 |

56

Figure\_S9-1\_PA-Me2NHC-ed(1,4AA) / electronic energy: -2903.98119581 a.u. / lowest freq: 16.11 cm-1

|   |          |           |           |
|---|----------|-----------|-----------|
| C | 4.856147 | -1.465620 | -0.651853 |
| H | 5.573297 | -0.962199 | 0.015518  |
| C | 4.154017 | -2.653199 | 0.021097  |
| H | 4.253731 | -3.589199 | -0.551504 |
| C | 2.562154 | -1.031587 | -0.527288 |



|    |           |           |           |
|----|-----------|-----------|-----------|
| Cu | 0.793073  | -0.132239 | -0.717347 |
| N  | 3.738769  | -0.574239 | -0.959522 |
| N  | 2.757308  | -2.220900 | 0.046320  |
| C  | -0.486121 | 1.289706  | 0.011878  |
| C  | 0.684838  | 1.249451  | 0.809576  |
| H  | 4.519578  | -2.841718 | 1.042121  |
| H  | 5.390193  | -1.748273 | -1.572189 |
| H  | -0.493349 | 2.054192  | -0.769157 |
| C  | 0.725058  | 0.542934  | 2.125258  |
| C  | 1.795033  | 2.211981  | 0.568488  |
| O  | 0.165171  | -0.675329 | 2.054104  |
| O  | 1.176026  | 0.986827  | 3.149264  |
| O  | 2.843655  | 2.233745  | 1.166762  |
| O  | 1.523996  | 3.059368  | -0.436024 |
| C  | 2.515844  | 4.026653  | -0.743131 |
| H  | 2.736302  | 4.650394  | 0.134278  |
| H  | 2.102673  | 4.641835  | -1.549329 |
| H  | 3.445785  | 3.546199  | -1.077593 |
| C  | 0.067045  | -1.407504 | 3.267307  |
| H  | 1.064115  | -1.592408 | 3.690669  |
| H  | -0.418679 | -2.355574 | 3.013266  |
| H  | -0.536216 | -0.858797 | 4.004113  |
| C  | -1.792237 | 0.743205  | 0.353527  |
| H  | -1.851406 | 0.066205  | 1.206673  |
| C  | -2.888894 | 1.018132  | -0.376367 |
| H  | -2.777083 | 1.671028  | -1.249085 |
| C  | -4.247457 | 0.510401  | -0.144194 |
| C  | -5.256849 | 0.825061  | -1.068109 |
| C  | -4.587811 | -0.289962 | 0.960381  |
| C  | -6.557356 | 0.351140  | -0.904061 |
| H  | -5.011883 | 1.447014  | -1.933235 |
| C  | -5.885530 | -0.761538 | 1.126303  |
| H  | -3.830000 | -0.551010 | 1.701570  |
| C  | -6.877331 | -0.445486 | 0.194225  |
| H  | -7.323918 | 0.606475  | -1.638977 |
| H  | -6.128202 | -1.382536 | 1.991658  |
| H  | -7.894860 | -0.819505 | 0.326653  |
| C  | -0.177108 | -0.829795 | -2.285469 |
| H  | 0.353735  | -0.859807 | -3.250321 |
| C  | -1.350375 | -1.391122 | -2.240446 |
| C  | -2.541972 | -1.954975 | -2.132611 |
| H  | -2.651630 | -3.010520 | -1.860507 |
| H  | -3.461530 | -1.386442 | -2.307466 |
| C  | 1.726988  | -3.092007 | 0.551196  |
| H  | 1.727910  | -4.048741 | 0.004433  |
| H  | 1.881333  | -3.303186 | 1.621223  |
| H  | 0.751548  | -2.608928 | 0.420733  |
| C  | 3.961237  | 0.681067  | -1.627671 |
| H  | 2.994340  | 1.168329  | -1.808139 |
| H  | 4.587128  | 1.347795  | -1.013705 |
| H  | 4.458719  | 0.521764  | -2.597299 |

56

Figure\_S9-1\_PA-Me2NHC-ts(1,4AA) / electronic energy: -2903.95210289 a.u. / lowest freq: -325.50 cm-1

|    |           |           |           |
|----|-----------|-----------|-----------|
| C  | 5.425295  | -0.608934 | -0.552769 |
| H  | 6.085128  | -0.057864 | 0.133764  |
| C  | 4.971887  | -1.963554 | 0.010437  |
| H  | 5.348854  | -2.817659 | -0.571784 |
| C  | 3.091096  | -0.665496 | -0.473290 |
| Cu | 1.228920  | -0.113434 | -0.549382 |
| N  | 4.157248  | 0.096826  | -0.727809 |
| N  | 3.516414  | -1.871577 | -0.086734 |
| C  | -0.680896 | 0.787748  | -0.389389 |
| C  | 0.170190  | 1.111215  | 0.778437  |
| H  | 5.273763  | -2.109355 | 1.060518  |
| H  | 5.945224  | -0.704444 | -1.520014 |
| H  | -0.726614 | 1.640430  | -1.070033 |
| C  | 0.197821  | 0.257733  | 1.966790  |
| C  | 0.899896  | 2.374724  | 0.817171  |
| O  | -0.110434 | -1.032915 | 1.634953  |
| O  | 0.480555  | 0.549687  | 3.105881  |
| O  | 1.495745  | 2.858742  | 1.755744  |
| O  | 0.883936  | 3.007930  | -0.391889 |
| C  | 1.554763  | 4.250702  | -0.457020 |
| H  | 1.144289  | 4.964657  | 0.271821  |
| H  | 1.404705  | 4.629734  | -1.474599 |
| H  | 2.630637  | 4.132803  | -0.258898 |
| C  | -0.141550 | -1.975363 | 2.688462  |
| H  | 0.840883  | -2.056718 | 3.176175  |
| H  | -0.411729 | -2.934980 | 2.232460  |
| H  | -0.887776 | -1.698188 | 3.447188  |
| C  | -2.023986 | 0.202859  | -0.147019 |
| H  | -2.052065 | -0.715796 | 0.439798  |
| C  | -3.147971 | 0.779282  | -0.593057 |
| H  | -3.068996 | 1.710821  | -1.165622 |
| C  | -4.520513 | 0.286011  | -0.379247 |
| C  | -5.603487 | 1.088858  | -0.770330 |
| C  | -4.801293 | -0.963664 | 0.200239  |
| C  | -6.919325 | 0.668303  | -0.582313 |
| H  | -5.408055 | 2.062372  | -1.227893 |

|   |           |           |           |
|---|-----------|-----------|-----------|
| C | -6.114139 | -1.384507 | 0.389085  |
| H | -3.984450 | -1.622329 | 0.502688  |
| C | -7.180821 | -0.570626 | 0.000491  |
| H | -7.743884 | 1.313754  | -0.893407 |
| H | -6.307530 | -2.359541 | 0.842116  |
| H | -8.210113 | -0.904057 | 0.149408  |
| C | -0.208669 | -0.504237 | -1.911439 |
| H | -0.241555 | 0.045321  | -2.858301 |
| C | -0.555043 | -1.759353 | -1.844040 |
| C | -0.939213 | -3.007527 | -1.682577 |
| H | -0.230331 | -3.838038 | -1.759355 |
| H | -1.989309 | -3.246539 | -1.482679 |
| C | 2.671478  | -2.953141 | 0.351826  |
| H | 2.908456  | -3.877726 | -0.197323 |
| H | 2.803502  | -3.144969 | 1.429429  |
| H | 1.621788  | -2.690357 | 0.166955  |
| C | 4.119515  | 1.459508  | -1.192559 |
| H | 3.073177  | 1.782844  | -1.268369 |
| H | 4.646271  | 2.126141  | -0.491518 |
| H | 4.592777  | 1.551717  | -2.183482 |

56

Figure\_S9-1\_PA-Me2NHC-prod(1,4AA) / electronic energy: -2904.00315785 a.u. / lowest freq: 12.12 cm-1

|    |           |           |           |
|----|-----------|-----------|-----------|
| C  | 6.114348  | 0.218837  | -0.632728 |
| H  | 6.803252  | 0.459290  | 0.192843  |
| C  | 5.744038  | -1.270658 | -0.682289 |
| H  | 5.898485  | -1.714713 | -1.678914 |
| C  | 3.826382  | -0.016348 | -0.234672 |
| Cu | 1.961130  | 0.367679  | 0.102378  |
| N  | 4.817972  | 0.858524  | -0.410411 |
| N  | 4.319372  | -1.251568 | -0.354436 |
| C  | -0.755915 | -0.060988 | -0.800015 |
| C  | -0.016849 | 0.553051  | 0.419420  |
| H  | 6.302926  | -1.875719 | 0.047201  |
| H  | 6.569047  | 0.579006  | -1.567704 |
| H  | -0.767328 | 0.737590  | -1.551249 |
| C  | -0.031850 | -0.213863 | 1.686379  |
| C  | -0.136115 | 2.018838  | 0.580225  |
| O  | -0.288923 | -1.527984 | 1.464325  |
| O  | 0.173753  | 0.185182  | 2.813854  |
| O  | 0.191770  | 2.690230  | 1.536440  |
| O  | -0.645022 | 2.618826  | -0.526861 |
| C  | -0.736196 | 4.028508  | -0.494118 |
| H  | -1.398451 | 4.366677  | 0.316026  |
| H  | -1.150974 | 4.332726  | -1.462338 |
| H  | 0.252002  | 4.490487  | -0.349777 |
| C  | -0.280489 | -2.377143 | 2.592123  |
| H  | 0.705052  | -2.381302 | 3.081669  |
| H  | -0.513207 | -3.381939 | 2.219972  |
| H  | -1.033893 | -2.069736 | 3.332093  |
| C  | -2.187955 | -0.411244 | -0.490800 |
| H  | -2.338458 | -1.326081 | 0.089789  |
| C  | -3.229534 | 0.349923  | -0.849145 |
| H  | -3.027746 | 1.269655  | -1.410320 |
| C  | -4.652659 | 0.096048  | -0.552880 |
| C  | -5.611950 | 1.033241  | -0.967435 |
| C  | -5.102789 | -1.049409 | 0.126456  |
| C  | -6.969376 | 0.839722  | -0.714502 |
| H  | -5.283382 | 1.931527  | -1.497248 |
| C  | -6.457133 | -1.244766 | 0.379675  |
| H  | -4.385434 | -1.801785 | 0.460450  |
| C  | -7.398735 | -0.301633 | -0.039173 |
| H  | -7.694961 | 1.585361  | -1.047576 |
| H  | -6.782910 | -2.143599 | 0.908431  |
| H  | -8.461139 | -0.458472 | 0.159738  |
| C  | 0.010530  | -1.200728 | -1.451097 |
| H  | 0.931637  | -0.910526 | -1.975896 |
| C  | -0.318094 | -2.467771 | -1.460930 |
| C  | -0.639765 | -3.737044 | -1.456314 |
| H  | -0.288167 | -4.405498 | -0.663004 |
| H  | -1.270792 | -4.169742 | -2.239649 |
| C  | 3.556890  | -2.473447 | -0.277380 |
| H  | 3.543610  | -2.992566 | -1.249433 |
| H  | 3.988222  | -3.151839 | 0.474951  |
| H  | 2.523022  | -2.238871 | 0.008951  |
| C  | 4.704134  | 2.291122  | -0.299352 |
| H  | 3.655967  | 2.551194  | -0.105476 |
| H  | 5.322107  | 2.669692  | 0.530441  |
| H  | 5.029190  | 2.782287  | -1.229740 |

56

Figure\_S9-1\_PA-Me2NHC-ed(1,4) / electronic energy: -2903.97461848 a.u. / lowest freq: 13.61 cm-1

|    |           |           |           |
|----|-----------|-----------|-----------|
| H  | 4.587567  | -1.860525 | -0.426336 |
| C  | 4.532984  | -0.768376 | -0.350224 |
| C  | 3.312892  | -0.193112 | -0.390389 |
| C  | 2.120266  | -1.002355 | -0.519290 |
| H  | 2.283883  | -2.081755 | -0.581840 |
| C  | 0.830574  | -0.593533 | -0.597718 |
| C  | -0.266511 | -1.593096 | -0.724530 |
| Cu | -2.566568 | 0.334619  | 0.860360  |
| C  | -4.256890 | 0.511056  | -0.107404 |

|   |           |           |           |
|---|-----------|-----------|-----------|
| N | -5.451255 | 0.508498  | 0.503707  |
| N | -4.471104 | 0.588801  | -1.424569 |
| C | 0.405413  | 0.838221  | -0.589398 |
| O | 1.070595  | 1.568957  | 0.301214  |
| O | -1.447615 | -1.329155 | -0.753297 |
| C | -5.884469 | 0.704425  | -1.776755 |
| H | -6.165629 | -0.055406 | -2.521394 |
| C | -6.578119 | 0.503552  | -0.424889 |
| H | -7.291833 | 1.305393  | -0.182764 |
| H | -7.116853 | -0.457089 | -0.363816 |
| H | -6.085842 | 1.696054  | -2.215742 |
| O | -0.431180 | 1.304139  | -1.325603 |
| C | 0.673736  | 2.926713  | 0.427090  |
| H | 0.781828  | 3.458944  | -0.528123 |
| H | 1.329645  | 3.366834  | 1.185327  |
| H | -0.374749 | 2.980451  | 0.754513  |
| O | 0.184246  | -2.845968 | -0.788746 |
| C | -0.792280 | -3.874045 | -0.728938 |
| H | -0.247976 | -4.819793 | -0.820582 |
| H | -1.520283 | -3.774335 | -1.545647 |
| H | -1.321875 | -3.834095 | 0.234183  |
| C | 5.826709  | -0.090208 | -0.212127 |
| C | 5.948655  | 1.304133  | -0.074608 |
| C | 6.998304  | -0.865025 | -0.213168 |
| C | 7.199650  | 1.896970  | 0.056284  |
| H | 5.058159  | 1.935654  | -0.066565 |
| C | 8.251570  | -0.271094 | -0.082683 |
| H | 6.920487  | -1.950196 | -0.318357 |
| C | 8.355981  | 1.112558  | 0.052685  |
| H | 7.276193  | 2.980884  | 0.164825  |
| H | 9.150192  | -0.891677 | -0.085667 |
| H | 9.336356  | 1.582120  | 0.157531  |
| H | 3.196731  | 0.888178  | -0.311015 |
| C | -1.171232 | 0.231931  | 2.215468  |
| H | -0.903598 | 1.065654  | 2.885914  |
| C | -0.519348 | -0.877849 | 2.423682  |
| C | 0.122054  | -2.027563 | 2.573757  |
| H | -0.245695 | -2.806980 | 3.250150  |
| H | 1.052744  | -2.229888 | 2.032007  |
| C | -5.667789 | 0.346751  | 1.918361  |
| H | -6.321327 | 1.144736  | 2.305033  |
| H | -6.139007 | -0.625595 | 2.139855  |
| H | -4.698442 | 0.396895  | 2.430723  |
| C | -3.456542 | 0.690562  | -2.443129 |
| H | -3.537445 | 1.655471  | -2.971391 |
| H | -2.465112 | 0.614647  | -1.982494 |
| H | -3.573153 | -0.117100 | -3.183732 |

56

Figure\_S9-1\_PA-Me2NHC-ts(1,4) / electronic energy: -2903.94929051 a.u. / lowest freq: -449.97 cm<sup>-1</sup>

|    |           |           |           |
|----|-----------|-----------|-----------|
| H  | -4.076734 | -1.893338 | 0.321712  |
| C  | -4.151167 | -0.811217 | 0.160746  |
| C  | -3.012954 | -0.097248 | 0.105715  |
| C  | -1.698096 | -0.725697 | 0.275980  |
| H  | -1.758022 | -1.785238 | 0.526266  |
| C  | -0.560160 | -0.088302 | 0.808413  |
| C  | 0.485336  | -0.910947 | 1.391716  |
| Cu | 2.208224  | -0.347626 | -0.417187 |
| C  | 4.113645  | 0.187564  | -0.234191 |
| N  | 5.151912  | -0.414606 | -0.829653 |
| N  | 4.586029  | 1.210370  | 0.482964  |
| C  | -0.285834 | 1.343475  | 0.652705  |
| O  | -1.013048 | 1.901214  | -0.338882 |
| O  | 1.623848  | -0.541667 | 1.698338  |
| C  | 6.027339  | 1.404279  | 0.335701  |
| H  | 6.516840  | 1.458948  | 1.319577  |
| C  | 6.442917  | 0.170811  | -0.474438 |
| H  | 7.020396  | 0.423129  | -1.376625 |
| H  | 7.037349  | -0.544975 | 0.117869  |
| H  | 6.231405  | 2.349232  | -0.195063 |
| O  | 0.496489  | 2.012440  | 1.297968  |
| C  | -0.822407 | 3.286381  | -0.558601 |
| H  | -1.060085 | 3.869378  | 0.343098  |
| H  | -1.499988 | 3.564436  | -1.373810 |
| H  | 0.217491  | 3.496959  | -0.847701 |
| O  | 0.124668  | -2.192579 | 1.583098  |
| C  | 1.136873  | -3.088238 | 2.005057  |
| H  | 0.650379  | -4.062098 | 2.128463  |
| H  | 1.582984  | -2.766619 | 2.956121  |
| H  | 1.932283  | -3.163687 | 1.247798  |
| C  | -5.521060 | -0.293261 | 0.019925  |
| C  | -5.807786 | 1.064225  | -0.209398 |
| C  | -6.598538 | -1.189306 | 0.110449  |
| C  | -7.121311 | 1.502921  | -0.343081 |
| H  | -4.995717 | 1.790114  | -0.285476 |
| C  | -7.914729 | -0.750966 | -0.024094 |
| H  | -6.397564 | -2.249102 | 0.288183  |
| C  | -8.181803 | 0.598059  | -0.252002 |
| H  | -7.320494 | 2.562044  | -0.521158 |
| H  | -8.734786 | -1.468812 | 0.048397  |

|   |           |           |           |
|---|-----------|-----------|-----------|
| H | -9.211487 | 0.945950  | -0.359498 |
| H | -3.033907 | 0.980028  | -0.060126 |
| C | 1.197853  | -0.880412 | -2.061345 |
| H | 1.867354  | -0.962932 | -2.923215 |
| C | -0.054355 | -1.094561 | -2.059572 |
| C | -1.393885 | -1.203722 | -1.847977 |
| H | -1.848338 | -2.197879 | -1.802200 |
| H | -2.028561 | -0.409454 | -2.250725 |
| C | 5.084497  | -1.619009 | -1.615400 |
| H | 5.555948  | -1.471188 | -2.600036 |
| H | 5.597382  | -2.453351 | -1.108037 |
| H | 4.031542  | -1.889402 | -1.761839 |
| C | 3.788899  | 2.153435  | 1.227646  |
| H | 3.776002  | 3.138582  | 0.731335  |
| H | 2.760411  | 1.781282  | 1.316508  |
| H | 4.208525  | 2.283960  | 2.237547  |

56

Figure\_S9-1\_PA-Me2NHC-prod(1,4) / electronic energy: -2903.99035566 a.u. / lowest freq: 12.37 cm-1

|    |           |           |           |
|----|-----------|-----------|-----------|
| H  | 3.827397  | -1.932621 | 0.015649  |
| C  | 4.030263  | -0.860593 | 0.130496  |
| C  | 2.990319  | -0.029418 | 0.276268  |
| C  | 1.553773  | -0.478585 | 0.295105  |
| H  | 1.553565  | -1.555930 | 0.085368  |
| C  | 0.636647  | 0.163972  | -0.731753 |
| C  | -0.297628 | -0.713618 | -1.342214 |
| Cu | -2.125136 | -0.288332 | 0.437187  |
| C  | -4.086347 | -0.039705 | 0.210886  |
| N  | -5.073659 | -0.836194 | 0.635855  |
| N  | -4.628091 | 0.995067  | -0.432020 |
| C  | 0.316370  | 1.560140  | -0.690002 |
| O  | 1.119958  | 2.253168  | 0.180487  |
| O  | -1.515389 | -0.491008 | -1.542651 |
| C  | -6.090084 | 0.987207  | -0.403274 |
| H  | -6.503084 | 1.115662  | -1.414602 |
| C  | -6.396046 | -0.387998 | 0.201071  |
| H  | -7.095344 | -0.340364 | 1.048838  |
| H  | -6.808563 | -1.093980 | -0.539322 |
| H  | -6.460957 | 1.816556  | 0.221844  |
| O  | -0.536041 | 2.171391  | -1.324229 |
| C  | 0.892513  | 3.640933  | 0.278190  |
| H  | 1.041158  | 4.144788  | -0.688741 |
| H  | 1.617424  | 4.022953  | 1.007759  |
| H  | -0.129485 | 3.857834  | 0.624883  |
| O  | 0.178062  | -1.941563 | -1.645012 |
| C  | -0.764085 | -2.929460 | -2.013711 |
| H  | -0.194424 | -3.851856 | -2.176297 |
| H  | -1.295646 | -2.654322 | -2.935329 |
| H  | -1.507571 | -3.090899 | -1.217401 |
| C  | 5.460039  | -0.494066 | 0.102997  |
| C  | 5.913152  | 0.833923  | 0.189430  |
| C  | 6.422618  | -1.509334 | -0.012146 |
| C  | 7.272888  | 1.129213  | 0.165792  |
| H  | 5.192966  | 1.650409  | 0.273068  |
| C  | 7.785473  | -1.215792 | -0.036085 |
| H  | 6.092774  | -2.549381 | -0.085116 |
| C  | 8.217683  | 0.106482  | 0.053669  |
| H  | 7.600016  | 2.169377  | 0.234821  |
| H  | 8.513632  | -2.025258 | -0.125947 |
| H  | 9.284361  | 0.340606  | 0.034473  |
| H  | 3.148293  | 1.046464  | 0.394988  |
| C  | -1.635012 | -0.480101 | 2.373532  |
| H  | -2.436293 | -0.536579 | 3.096363  |
| C  | -0.506881 | -0.430237 | 1.863463  |
| C  | 0.959973  | -0.294397 | 1.723397  |
| H  | 1.431878  | -1.001618 | 2.424614  |
| H  | 1.200113  | 0.720421  | 2.076841  |
| C  | -4.905555 | -2.126066 | 1.254205  |
| H  | -5.461505 | -2.182312 | 2.203174  |
| H  | -5.268132 | -2.929439 | 0.591588  |
| H  | -3.840172 | -2.293108 | 1.455097  |
| C  | -3.902441 | 2.110052  | -0.992023 |
| H  | -4.065648 | 3.025375  | -0.398785 |
| H  | -2.827403 | 1.884299  | -1.025574 |
| H  | -4.246658 | 2.301209  | -2.020052 |

20

Figure\_S9-1\_PMe3-Cu-allenyl / electronic energy: -2217.18081038 a.u. / lowest freq: 11.56 cm-1

|    |           |           |           |
|----|-----------|-----------|-----------|
| Cu | -0.560515 | -0.423375 | -0.001720 |
| C  | -2.432841 | -0.885632 | 0.001582  |
| H  | -2.795334 | -1.927022 | 0.005243  |
| C  | -3.361235 | 0.031770  | 0.000489  |
| C  | -4.267218 | 0.995319  | -0.000581 |
| H  | -4.662553 | 1.405817  | -0.936021 |
| H  | -4.659265 | 1.410908  | 0.933996  |
| P  | 1.600036  | 0.123265  | -0.000003 |
| C  | 2.748935  | -1.283966 | -0.218460 |
| H  | 2.546754  | -1.774384 | -1.181161 |
| H  | 3.795305  | -0.944626 | -0.195816 |
| H  | 2.586607  | -2.016869 | 0.584369  |
| C  | 2.107021  | 1.292052  | -1.312942 |

|   |          |          |           |
|---|----------|----------|-----------|
| H | 1.880617 | 0.855999 | -2.296084 |
| H | 1.540405 | 2.228072 | -1.209306 |
| H | 3.183775 | 1.509070 | -1.250167 |
| C | 2.192732 | 0.921893 | 1.535582  |
| H | 2.020015 | 0.248277 | 2.386749  |
| H | 3.265620 | 1.155807 | 1.467496  |
| H | 1.628085 | 1.849223 | 1.706612  |

52

Figure\_S9-1\_PA-PMe3-ed(1,6) / electronic energy: -3059.13763951 a.u. / lowest freq: 6.61 cm<sup>-1</sup>

|    |           |           |           |
|----|-----------|-----------|-----------|
| Cu | 0.946134  | 0.662142  | -0.486494 |
| C  | -0.311842 | 0.112366  | 1.075112  |
| C  | 0.886842  | -0.629223 | 1.129262  |
| H  | -0.339419 | 1.012421  | 1.695992  |
| C  | 0.958544  | -2.047130 | 0.656424  |
| C  | 2.020812  | -0.176838 | 1.980698  |
| O  | 0.463314  | -2.180604 | -0.581756 |
| O  | 1.388376  | -2.973729 | 1.292329  |
| O  | 3.098544  | -0.723933 | 2.045992  |
| O  | 1.745428  | 0.952257  | 2.638323  |
| C  | 2.796968  | 1.527773  | 3.400638  |
| H  | 3.175533  | 0.813865  | 4.144536  |
| H  | 2.366406  | 2.402458  | 3.898738  |
| H  | 3.624249  | 1.839328  | 2.747163  |
| C  | 0.400385  | -3.498855 | -1.111991 |
| H  | 1.406758  | -3.934366 | -1.185665 |
| H  | -0.045441 | -3.403832 | -2.107336 |
| H  | -0.222039 | -4.143260 | -0.475810 |
| C  | -1.599882 | -0.345001 | 0.582509  |
| H  | -1.619905 | -1.248391 | -0.029396 |
| C  | -2.732343 | 0.336947  | 0.846088  |
| H  | -2.657518 | 1.243442  | 1.453671  |
| C  | -4.088044 | -0.000834 | 0.392753  |
| C  | -5.140863 | 0.875135  | 0.704580  |
| C  | -4.387170 | -1.159573 | -0.344949 |
| C  | -6.445064 | 0.609716  | 0.293589  |
| H  | -4.925937 | 1.783800  | 1.272966  |
| C  | -5.690191 | -1.426828 | -0.753765 |
| H  | -3.595689 | -1.866138 | -0.602503 |
| C  | -6.725383 | -0.543958 | -0.437935 |
| H  | -7.245838 | 1.308168  | 0.546078  |
| H  | -5.901434 | -2.334514 | -1.323521 |
| H  | -7.746792 | -0.756303 | -0.760971 |
| C  | 0.013970  | 2.070678  | -1.498341 |
| H  | 0.490863  | 2.460920  | -2.411316 |
| C  | -1.122201 | 2.606468  | -1.160161 |
| C  | -2.286590 | 3.098521  | -0.772631 |
| H  | -2.348078 | 3.953926  | -0.091670 |
| H  | -3.227662 | 2.662799  | -1.123952 |
| P  | 3.056672  | 0.301910  | -1.341566 |
| C  | 4.376103  | 1.238848  | -0.488430 |
| H  | 4.453766  | 0.869484  | 0.544059  |
| H  | 5.344546  | 1.106225  | -0.993331 |
| H  | 4.117857  | 2.307148  | -0.467805 |
| C  | 3.223935  | 0.801252  | -3.091436 |
| H  | 2.514205  | 0.225340  | -3.702413 |
| H  | 2.975435  | 1.867720  | -3.188506 |
| H  | 4.245528  | 0.631657  | -3.462747 |
| C  | 3.674816  | -1.418430 | -1.306574 |
| H  | 4.694821  | -1.486488 | -1.713095 |
| H  | 3.669915  | -1.766955 | -0.263242 |
| H  | 3.005794  | -2.057348 | -1.899851 |

52

Figure\_S9-1\_PA-PMe3-ts(1,6) / electronic energy: -3059.12059614 a.u. / lowest freq: -486.10 cm<sup>-1</sup>

|    |           |           |           |
|----|-----------|-----------|-----------|
| Cu | 0.973463  | -0.486190 | -0.667064 |
| C  | -0.360566 | 1.096250  | -0.063125 |
| C  | 0.859541  | 1.161787  | 0.687679  |
| H  | -0.356011 | 1.708343  | -0.970943 |
| C  | 0.982082  | 0.599623  | 2.051507  |
| C  | 1.948043  | 2.048769  | 0.248970  |
| O  | 0.367932  | -0.598802 | 2.155069  |
| O  | 1.555705  | 1.097799  | 2.989773  |
| O  | 3.047309  | 2.135405  | 0.759319  |
| O  | 1.636875  | 2.742161  | -0.863627 |
| C  | 2.665008  | 3.533640  | -1.431971 |
| H  | 3.044770  | 4.268214  | -0.708299 |
| H  | 2.215928  | 4.047865  | -2.288813 |
| H  | 3.502451  | 2.907289  | -1.773320 |
| C  | 0.365506  | -1.206541 | 3.436453  |
| H  | 1.392043  | -1.394981 | 3.782086  |
| H  | -0.173046 | -2.153877 | 3.324931  |
| H  | -0.142116 | -0.567410 | 4.172775  |
| C  | -1.592458 | 0.517937  | 0.270566  |
| H  | -1.687461 | -0.039214 | 1.203016  |
| C  | -2.654334 | 0.537070  | -0.642765 |
| H  | -2.570468 | 1.280580  | -1.440970 |
| C  | -4.053752 | 0.265115  | -0.224743 |
| C  | -5.107928 | 0.905840  | -0.890250 |
| C  | -4.366846 | -0.626846 | 0.812843  |
| C  | -6.433833 | 0.675070  | -0.525474 |

|   |           |           |           |
|---|-----------|-----------|-----------|
| H | -4.883062 | 1.600820  | -1.703940 |
| C | -5.690266 | -0.859680 | 1.177120  |
| H | -3.566510 | -1.156522 | 1.334748  |
| C | -6.730888 | -0.208626 | 0.511004  |
| H | -7.239252 | 1.189587  | -1.054631 |
| H | -5.913009 | -1.559595 | 1.985753  |
| H | -7.768639 | -0.393264 | 0.796808  |
| C | 0.077420  | -1.547483 | -2.125677 |
| H | 0.746677  | -2.216909 | -2.667929 |
| C | -1.174205 | -1.373949 | -2.212348 |
| C | -2.491089 | -1.047482 | -2.060582 |
| H | -2.985680 | -0.503160 | -2.871174 |
| H | -3.122367 | -1.783135 | -1.552330 |
| P | 3.102831  | -1.286392 | -0.413075 |
| C | 4.377154  | -0.286528 | -1.263249 |
| H | 4.368668  | 0.721446  | -0.824011 |
| H | 5.375768  | -0.731149 | -1.137565 |
| H | 4.141844  | -0.213236 | -2.334504 |
| C | 3.404233  | -2.986645 | -1.015154 |
| H | 2.731996  | -3.682485 | -0.493082 |
| H | 3.187019  | -3.038988 | -2.091902 |
| H | 4.447505  | -3.291551 | -0.844828 |
| C | 3.684695  | -1.312529 | 1.318606  |
| H | 4.718412  | -1.682126 | 1.390433  |
| H | 3.629386  | -0.286421 | 1.710648  |
| H | 3.024594  | -1.955984 | 1.917287  |

52

Figure\_S9-1\_PA-PMe3-prod(1,6) / electronic energy: -3059.16803726 a.u. / lowest freq: 11.07 cm-1

|    |           |           |           |
|----|-----------|-----------|-----------|
| Cu | 0.641392  | -1.430481 | -0.158173 |
| C  | -0.261848 | 0.744701  | -0.102685 |
| C  | 0.707636  | 1.532490  | 0.619003  |
| H  | -0.377822 | 1.045410  | -1.150061 |
| C  | 1.196600  | 1.168387  | 1.932073  |
| C  | 1.323333  | 2.665368  | -0.036311 |
| O  | 0.892494  | -0.134953 | 2.245746  |
| O  | 1.854816  | 1.828119  | 2.712321  |
| O  | 2.226730  | 3.372658  | 0.375618  |
| O  | 0.813691  | 2.888561  | -1.289504 |
| C  | 1.396221  | 3.944163  | -2.022758 |
| H  | 1.271366  | 4.908433  | -1.507920 |
| H  | 0.877714  | 3.972648  | -2.988805 |
| H  | 2.472031  | 3.776769  | -2.184719 |
| C  | 1.352911  | -0.609650 | 3.493015  |
| H  | 2.452534  | -0.611438 | 3.540506  |
| H  | 0.975828  | -1.634984 | 3.591595  |
| H  | 0.974192  | 0.007696  | 4.320347  |
| C  | -1.113747 | -0.252283 | 0.323170  |
| H  | -1.184042 | -0.477308 | 1.391467  |
| C  | -2.202460 | -0.849509 | -0.549080 |
| H  | -1.931584 | -0.691537 | -1.605462 |
| C  | -3.566017 | -0.218254 | -0.328675 |
| C  | -4.259715 | 0.359694  | -1.396422 |
| C  | -4.155117 | -0.191915 | 0.942510  |
| C  | -5.509756 | 0.949995  | -1.204396 |
| H  | -3.812300 | 0.351165  | -2.394050 |
| C  | -5.403705 | 0.394345  | 1.138322  |
| H  | -3.630458 | -0.628345 | 1.796817  |
| C  | -6.086387 | 0.968420  | 0.064211  |
| H  | -6.032711 | 1.399155  | -2.051793 |
| H  | -5.846431 | 0.407126  | 2.136828  |
| H  | -7.063610 | 1.431287  | 0.218058  |
| C  | 0.204828  | -3.496730 | -0.522113 |
| H  | 1.022059  | -4.182658 | -0.680478 |
| C  | -0.883287 | -2.939236 | -0.399370 |
| C  | -2.239144 | -2.375710 | -0.302667 |
| H  | -2.906532 | -2.889545 | -1.011512 |
| H  | -2.624264 | -2.581627 | 0.709251  |
| P  | 2.786707  | -0.984455 | -0.769054 |
| C  | 2.832932  | 0.089503  | -2.250330 |
| H  | 2.264394  | 1.007673  | -2.045712 |
| H  | 3.867252  | 0.346246  | -2.523506 |
| H  | 2.354651  | -0.432632 | -3.091592 |
| C  | 3.801101  | -2.426255 | -1.265096 |
| H  | 3.911744  | -3.109549 | -0.410578 |
| H  | 3.295153  | -2.966639 | -2.078400 |
| H  | 4.798661  | -2.113494 | -1.608151 |
| C  | 3.857254  | -0.111163 | 0.428282  |
| H  | 4.874898  | -0.003005 | 0.024243  |
| H  | 3.445924  | 0.885489  | 0.640462  |
| H  | 3.898707  | -0.678796 | 1.368435  |

52

Figure\_S9-1\_PA-PMe3-ed(1,4AA) / electronic energy: -3059.13763951 a.u. / lowest freq: 6.60 cm-1

|    |           |           |           |
|----|-----------|-----------|-----------|
| Cu | 0.946133  | 0.662144  | -0.486490 |
| C  | -0.311841 | 0.112360  | 1.075114  |
| C  | 0.886843  | -0.629229 | 1.129260  |
| H  | -0.339417 | 1.012412  | 1.695999  |
| C  | 0.958546  | -2.047133 | 0.656413  |
| C  | 2.020815  | -0.176848 | 1.980697  |
| O  | 0.463314  | -2.180601 | -0.581766 |

|   |           |           |           |
|---|-----------|-----------|-----------|
| O | 1.388382  | -2.973734 | 1.292312  |
| O | 3.098547  | -0.723942 | 2.045986  |
| O | 1.745431  | 0.952242  | 2.638330  |
| C | 2.796970  | 1.527753  | 3.400647  |
| H | 3.175533  | 0.813842  | 4.144544  |
| H | 2.366409  | 2.402438  | 3.898751  |
| H | 3.624253  | 1.839310  | 2.747175  |
| C | 0.400385  | -3.498850 | -1.112008 |
| H | 1.406759  | -3.934359 | -1.185687 |
| H | -0.045444 | -3.403822 | -2.107351 |
| H | -0.222036 | -4.143258 | -0.475828 |
| C | -1.599881 | -0.345003 | 0.582510  |
| H | -1.619906 | -1.248390 | -0.029400 |
| C | -2.732342 | 0.336943  | 0.846093  |
| H | -2.657517 | 1.243435  | 1.453681  |
| C | -4.088043 | -0.000835 | 0.392756  |
| C | -5.140863 | 0.875128  | 0.704594  |
| C | -4.387167 | -1.159566 | -0.344960 |
| C | -6.445064 | 0.609710  | 0.293603  |
| H | -4.925939 | 1.783787  | 1.272991  |
| C | -5.690188 | -1.426819 | -0.753777 |
| H | -3.595684 | -1.866125 | -0.602524 |
| C | -6.725382 | -0.543955 | -0.437934 |
| H | -7.245839 | 1.308157  | 0.546102  |
| H | -5.901430 | -2.334498 | -1.323544 |
| H | -7.746791 | -0.756299 | -0.760972 |
| C | 0.013969  | 2.070686  | -1.498329 |
| H | 0.490869  | 2.460939  | -2.411297 |
| C | -1.122208 | 2.606465  | -1.160155 |
| C | -2.286604 | 3.098507  | -0.772631 |
| H | -3.227669 | 2.662782  | -1.123965 |
| H | -2.348104 | 3.953905  | -0.091663 |
| P | 3.056671  | 0.301920  | -1.341565 |
| C | 3.674817  | -1.418420 | -1.306582 |
| H | 3.005794  | -2.057337 | -1.899858 |
| H | 4.694821  | -1.486475 | -1.713107 |
| H | 3.669920  | -1.766949 | -0.263251 |
| C | 4.376101  | 1.238855  | -0.488424 |
| H | 4.117853  | 2.307155  | -0.467792 |
| H | 4.453766  | 0.869484  | 0.544063  |
| H | 5.344543  | 1.106236  | -0.993327 |
| C | 3.223933  | 0.801272  | -3.091432 |
| H | 4.245525  | 0.631678  | -3.462744 |
| H | 2.514201  | 0.225365  | -3.702412 |
| H | 2.975435  | 1.867742  | -3.188495 |

52

Figure\_S9-1\_PA-PMe3-ts(1,4AA) / electronic energy: -3059.10503746 a.u. / lowest freq: -349.31 cm-1

|    |           |           |           |
|----|-----------|-----------|-----------|
| Cu | -1.342484 | 0.211451  | 0.739081  |
| C  | 0.512319  | 0.525522  | -0.332475 |
| C  | -0.468572 | -0.221415 | -1.141922 |
| H  | 0.566119  | 1.562542  | -0.666237 |
| C  | -0.598195 | -1.675925 | -1.077874 |
| C  | -1.319841 | 0.502435  | -2.083729 |
| O  | -0.125684 | -2.150815 | 0.113679  |
| O  | -1.089356 | -2.429035 | -1.888888 |
| O  | -2.117073 | 0.030533  | -2.869751 |
| O  | -1.174343 | 1.847996  | -1.970206 |
| C  | -1.996244 | 2.644949  | -2.799898 |
| H  | -1.807922 | 2.440339  | -3.863794 |
| H  | -1.745217 | 3.687179  | -2.571576 |
| H  | -3.061846 | 2.465963  | -2.593582 |
| C  | -0.162806 | -3.553617 | 0.300735  |
| H  | -1.197614 | -3.925713 | 0.305296  |
| H  | 0.305494  | -3.745689 | 1.272744  |
| H  | 0.392141  | -4.072814 | -0.493693 |
| C  | 1.855878  | -0.053901 | -0.093999 |
| H  | 1.898009  | -1.116125 | 0.148688  |
| C  | 2.971884  | 0.681981  | -0.199158 |
| H  | 2.868281  | 1.750803  | -0.420468 |
| C  | 4.356718  | 0.209619  | -0.033938 |
| C  | 5.402810  | 1.142856  | -0.104299 |
| C  | 4.684764  | -1.137887 | 0.195657  |
| C  | 6.730654  | 0.750311  | 0.055841  |
| H  | 5.168672  | 2.195222  | -0.285371 |
| C  | 6.009856  | -1.530976 | 0.355257  |
| H  | 3.896806  | -1.891989 | 0.246277  |
| C  | 7.039337  | -0.589079 | 0.287457  |
| H  | 7.526955  | 1.495658  | -0.000735 |
| H  | 6.242322  | -2.583470 | 0.532117  |
| H  | 8.078459  | -0.900740 | 0.413363  |
| C  | 0.224607  | 1.087083  | 1.631291  |
| H  | 0.766668  | 0.448856  | 2.339124  |
| C  | 0.138302  | 2.375743  | 1.818559  |
| C  | 0.053211  | 3.683964  | 1.917711  |
| H  | 0.840436  | 4.331207  | 1.517012  |
| H  | -0.797096 | 4.163263  | 2.412779  |
| P  | -3.491797 | -0.327766 | 0.982651  |
| C  | -3.764232 | -2.113859 | 0.695469  |
| H  | -3.257271 | -2.691188 | 1.481775  |

|   |           |           |           |
|---|-----------|-----------|-----------|
| H | -4.837034 | -2.357845 | 0.699451  |
| H | -3.329342 | -2.388985 | -0.277032 |
| C | -4.507308 | 0.473948  | -0.309416 |
| H | -4.473425 | 1.564509  | -0.173927 |
| H | -4.078463 | 0.230463  | -1.293111 |
| H | -5.552106 | 0.132496  | -0.263845 |
| C | -4.389708 | 0.017843  | 2.536468  |
| H | -5.438825 | -0.306605 | 2.467842  |
| H | -3.898887 | -0.507312 | 3.368128  |
| H | -4.355294 | 1.097377  | 2.740566  |

52

Figure\_S9-1\_PA-PMe3-prod(1,4A) / electronic energy: -3059.15445792 a.u. / lowest freq: 10.07 cm-1

|    |           |           |           |
|----|-----------|-----------|-----------|
| Cu | -1.853285 | -0.031563 | -0.851074 |
| C  | 0.694401  | -0.372027 | -0.468226 |
| C  | -0.243212 | 0.165112  | 0.633960  |
| H  | 0.683344  | -1.463567 | -0.376536 |
| C  | -0.375077 | 1.591961  | 0.871401  |
| C  | -0.730680 | -0.746376 | 1.655533  |
| O  | 0.231676  | 2.324802  | -0.114856 |
| O  | -0.953721 | 2.167287  | 1.775181  |
| O  | -1.417384 | -0.486893 | 2.629603  |
| O  | -0.376892 | -2.040647 | 1.404831  |
| C  | -0.858519 | -3.014194 | 2.306368  |
| H  | -0.570140 | -2.783609 | 3.341974  |
| H  | -0.410002 | -3.966573 | 1.999238  |
| H  | -1.955617 | -3.094676 | 2.261490  |
| C  | 0.125313  | 3.728973  | -0.010355 |
| H  | -0.926429 | 4.052577  | -0.015908 |
| H  | 0.644525  | 4.143950  | -0.882504 |
| H  | 0.595137  | 4.100208  | 0.912237  |
| C  | 2.126545  | 0.083633  | -0.385878 |
| H  | 2.287837  | 1.163127  | -0.450866 |
| C  | 3.156066  | -0.758177 | -0.229049 |
| H  | 2.947155  | -1.833796 | -0.181662 |
| C  | 4.582036  | -0.395070 | -0.116200 |
| C  | 5.548794  | -1.412274 | -0.138967 |
| C  | 5.023962  | 0.932632  | 0.015043  |
| C  | 6.908400  | -1.118511 | -0.044933 |
| H  | 5.225851  | -2.452465 | -0.235445 |
| C  | 6.380620  | 1.227755  | 0.109784  |
| H  | 4.297596  | 1.747019  | 0.053730  |
| C  | 7.330629  | 0.204335  | 0.078748  |
| H  | 7.641563  | -1.927922 | -0.066573 |
| H  | 6.700551  | 2.266962  | 0.215311  |
| H  | 8.394643  | 0.437833  | 0.157319  |
| C  | 0.049114  | -0.026872 | -1.815012 |
| H  | 0.177706  | 1.001636  | -2.175638 |
| C  | -0.682274 | -0.872417 | -2.546071 |
| C  | -1.185883 | -1.746022 | -3.386792 |
| H  | -0.537218 | -2.231592 | -4.124118 |
| H  | -2.244330 | -2.016929 | -3.384047 |
| P  | -3.975001 | 0.033752  | -0.159708 |
| C  | -4.218207 | 1.591761  | 0.763393  |
| H  | -4.155066 | 2.441725  | 0.068812  |
| H  | -5.193603 | 1.607530  | 1.271804  |
| H  | -3.401863 | 1.682628  | 1.495856  |
| C  | -4.331801 | -1.259346 | 1.080361  |
| H  | -4.249713 | -2.252318 | 0.615853  |
| H  | -3.579952 | -1.175762 | 1.879624  |
| H  | -5.340337 | -1.133774 | 1.501813  |
| C  | -5.386784 | -0.044000 | -1.318351 |
| H  | -6.341981 | 0.065479  | -0.783175 |
| H  | -5.294192 | 0.758636  | -2.063502 |
| H  | -5.375298 | -1.008947 | -1.844973 |

52

Figure\_S9-1\_PA-PMe3-ed(1,4) / electronic energy: -3059.13081436 a.u. / lowest freq: 15.01 cm-1

|    |           |           |           |
|----|-----------|-----------|-----------|
| H  | -4.127353 | 1.771654  | -0.567097 |
| C  | -4.025590 | 0.690314  | -0.420134 |
| C  | -2.780252 | 0.169848  | -0.422283 |
| C  | -1.628733 | 1.025090  | -0.607630 |
| H  | -1.841923 | 2.088027  | -0.751779 |
| C  | -0.321548 | 0.672813  | -0.644634 |
| C  | 0.735123  | 1.705122  | -0.823233 |
| Cu | 2.820474  | -0.060464 | 1.018203  |
| C  | 0.174116  | -0.729707 | -0.517425 |
| O  | -0.422384 | -1.402715 | 0.461131  |
| O  | 1.924138  | 1.497646  | -0.706763 |
| O  | 1.022602  | -1.214079 | -1.230102 |
| C  | 0.077786  | -2.705202 | 0.732650  |
| H  | 0.003416  | -3.351518 | -0.152709 |
| H  | -0.533735 | -3.102682 | 1.548865  |
| H  | 1.129990  | -2.636540 | 1.047504  |
| O  | 0.245233  | 2.906789  | -1.111643 |
| C  | 1.170248  | 3.984568  | -1.120423 |
| H  | 0.590441  | 4.882616  | -1.357840 |
| H  | 1.949273  | 3.825663  | -1.878756 |
| H  | 1.640039  | 4.085668  | -0.131579 |
| C  | -5.289371 | -0.031532 | -0.238761 |
| C  | -5.355019 | -1.421565 | -0.035259 |



|   |           |           |           |
|---|-----------|-----------|-----------|
| C | -6.490112 | 0.696530  | -0.267463 |
| C | -6.581206 | -2.055517 | 0.132569  |
| H | -4.439843 | -2.016150 | -0.006609 |
| C | -7.718263 | 0.061477  | -0.099455 |
| H | -6.455539 | 1.777793  | -0.423368 |
| C | -7.767184 | -1.317359 | 0.101113  |
| H | -6.614760 | -3.135538 | 0.290433  |
| H | -8.640734 | 0.645318  | -0.124689 |
| H | -8.728143 | -1.818781 | 0.234106  |
| H | -2.614354 | -0.897627 | -0.270132 |
| C | 1.694147  | 0.477808  | 2.511125  |
| H | 1.614321  | -0.093316 | 3.450444  |
| C | 0.959512  | 1.552765  | 2.445023  |
| C | 0.228005  | 2.648611  | 2.309848  |
| H | 0.602784  | 3.629916  | 2.620618  |
| H | -0.781829 | 2.605506  | 1.887137  |
| P | 4.228350  | -1.032461 | -0.416956 |
| C | 4.127762  | -0.354377 | -2.111270 |
| H | 4.391922  | 0.711951  | -2.091327 |
| H | 4.795491  | -0.892166 | -2.800849 |
| H | 3.083408  | -0.443726 | -2.439272 |
| C | 6.019669  | -0.968187 | -0.034537 |
| H | 6.613678  | -1.470438 | -0.813074 |
| H | 6.338193  | 0.081225  | 0.043563  |
| H | 6.204237  | -1.456060 | 0.933285  |
| C | 3.921700  | -2.820443 | -0.669689 |
| H | 4.609530  | -3.243301 | -1.417530 |
| H | 4.047714  | -3.353505 | 0.283698  |
| H | 2.883310  | -2.941087 | -1.008378 |

52

Figure\_S9-1\_PA-PMe3-ts(1,4) / electronic energy: -3059.10625840 a.u. / lowest freq: -463.12 cm<sup>-1</sup>

|    |           |           |           |
|----|-----------|-----------|-----------|
| H  | 3.758711  | -1.837622 | 0.079067  |
| C  | 3.729212  | -0.744279 | -0.001348 |
| C  | 2.528062  | -0.140773 | -0.033652 |
| C  | 1.280498  | -0.914439 | -0.007891 |
| H  | 1.448460  | -1.990419 | -0.057200 |
| C  | 0.067630  | -0.523220 | -0.619356 |
| C  | -0.881224 | -1.567643 | -0.986657 |
| Cu | -2.494694 | -0.372571 | 0.730382  |
| C  | -0.358875 | 0.869066  | -0.765832 |
| O  | 0.372002  | 1.709738  | -0.002705 |
| O  | -2.067142 | -1.407072 | -1.270002 |
| O  | -1.258836 | 1.291650  | -1.470110 |
| C  | 0.048114  | 3.085235  | -0.068618 |
| H  | 0.029126  | 3.444246  | -1.107213 |
| H  | 0.825258  | 3.611520  | 0.497451  |
| H  | -0.933165 | 3.276001  | 0.390574  |
| O  | -0.360215 | -2.804207 | -0.959116 |
| C  | -1.259544 | -3.881596 | -1.154923 |
| H  | -0.660488 | -4.796188 | -1.085347 |
| H  | -1.740490 | -3.821234 | -2.140894 |
| H  | -2.039427 | -3.884838 | -0.379416 |
| C  | 5.045227  | -0.089763 | -0.063749 |
| C  | 5.204715  | 1.301130  | -0.195890 |
| C  | 6.201698  | -0.883291 | 0.008385  |
| C  | 6.472559  | 1.870822  | -0.253092 |
| H  | 4.328316  | 1.949438  | -0.257705 |
| C  | 7.472258  | -0.313424 | -0.047900 |
| H  | 6.098422  | -1.966711 | 0.111824  |
| C  | 7.613104  | 1.067178  | -0.179706 |
| H  | 6.574207  | 2.953194  | -0.358908 |
| H  | 8.356411  | -0.952205 | 0.010039  |
| H  | 8.606488  | 1.518380  | -0.227070 |
| H  | 2.444069  | 0.943678  | -0.099392 |
| C  | -1.511859 | -0.863387 | 2.391275  |
| H  | -2.183310 | -0.923645 | 3.253525  |
| C  | -0.247968 | -0.980507 | 2.398704  |
| C  | 1.092400  | -1.024604 | 2.159885  |
| H  | 1.609523  | -1.985085 | 2.240844  |
| H  | 1.681570  | -0.146058 | 2.439875  |
| P  | -4.238567 | 0.839178  | -0.037521 |
| C  | -4.571023 | 0.526911  | -1.805738 |
| H  | -4.868989 | -0.521983 | -1.940369 |
| H  | -5.357108 | 1.191151  | -2.194830 |
| H  | -3.626532 | 0.686642  | -2.342970 |
| C  | -5.873789 | 0.623448  | 0.761582  |
| H  | -6.636890 | 1.263698  | 0.293701  |
| H  | -6.183732 | -0.428065 | 0.676378  |
| H  | -5.795507 | 0.873837  | 1.829319  |
| C  | -3.978569 | 2.650197  | 0.013923  |
| H  | -4.837747 | 3.189528  | -0.412645 |
| H  | -3.820628 | 2.975703  | 1.052051  |
| H  | -3.074153 | 2.870684  | -0.569900 |

52

Figure\_S9-1\_PA-PMe3-prod(1,4) / electronic energy: -3059.16938303 a.u. / lowest freq: 24.51 cm<sup>-1</sup>

|   |           |           |          |
|---|-----------|-----------|----------|
| H | -2.888672 | 1.319704  | 1.323779 |
| C | -3.134930 | 0.412332  | 0.759396 |
| C | -2.163309 | -0.487431 | 0.559318 |
| C | -0.743882 | -0.298985 | 1.022574 |

|    |           |           |           |
|----|-----------|-----------|-----------|
| H  | -0.701371 | 0.648124  | 1.574076  |
| C  | 0.254574  | -0.142124 | -0.146460 |
| C  | 0.404427  | 1.207334  | -0.703437 |
| Cu | 2.143568  | -0.326332 | 0.815999  |
| C  | 0.419745  | -1.238632 | -1.107804 |
| O  | -0.159005 | -2.391404 | -0.667030 |
| O  | 0.919159  | 1.535021  | -1.757864 |
| O  | 1.007193  | -1.231882 | -2.171676 |
| C  | 0.008925  | -3.533057 | -1.482817 |
| H  | -0.456236 | -3.390729 | -2.469300 |
| H  | -0.480775 | -4.362201 | -0.958485 |
| H  | 1.074252  | -3.762545 | -1.632194 |
| O  | -0.089527 | 2.161464  | 0.130781  |
| C  | 0.024315  | 3.502294  | -0.297623 |
| H  | -0.505695 | 4.108985  | 0.446214  |
| H  | -0.429892 | 3.646821  | -1.288282 |
| H  | 1.077071  | 3.819914  | -0.346889 |
| C  | -4.534334 | 0.322493  | 0.300683  |
| C  | -4.983084 | -0.655959 | -0.602868 |
| C  | -5.468766 | 1.253863  | 0.780229  |
| C  | -6.316669 | -0.705184 | -0.998606 |
| H  | -4.277911 | -1.383635 | -1.010457 |
| C  | -6.804928 | 1.205857  | 0.385650  |
| H  | -5.138706 | 2.027424  | 1.478923  |
| C  | -7.235644 | 0.224019  | -0.505382 |
| H  | -6.642130 | -1.472577 | -1.704725 |
| H  | -7.512884 | 1.941221  | 0.774970  |
| H  | -8.281086 | 0.183634  | -0.819091 |
| H  | -2.362825 | -1.412954 | 0.008538  |
| C  | 2.294863  | -1.231245 | 2.702490  |
| H  | 3.218511  | -1.318188 | 3.253201  |
| C  | 1.119191  | -1.274489 | 2.329274  |
| C  | -0.318089 | -1.392661 | 2.027185  |
| H  | -0.896195 | -1.310201 | 2.961096  |
| H  | -0.495741 | -2.392548 | 1.608151  |
| P  | 3.968480  | 0.492094  | -0.227315 |
| C  | 3.909198  | 2.302317  | -0.480522 |
| H  | 3.835575  | 2.814953  | 0.489229  |
| H  | 4.803913  | 2.655848  | -1.014367 |
| H  | 3.010126  | 2.524581  | -1.073412 |
| C  | 5.624606  | 0.208102  | 0.499178  |
| H  | 6.415696  | 0.622070  | -0.144216 |
| H  | 5.678237  | 0.683742  | 1.489079  |
| H  | 5.788878  | -0.871679 | 0.624804  |
| C  | 4.099290  | -0.163046 | -1.926149 |
| H  | 4.902842  | 0.337050  | -2.487157 |
| H  | 4.294971  | -1.244071 | -1.886774 |
| H  | 3.123828  | -0.010904 | -2.410503 |

32

Figure\_S10-1\_dienoate / electronic energy: -841.927078481 a.u. / lowest freq: 24.55 cm-1

|   |           |           |           |
|---|-----------|-----------|-----------|
| C | -0.660544 | -0.726572 | 0.059153  |
| C | -1.860539 | -0.097447 | 0.115996  |
| H | -0.691600 | -1.818492 | -0.004770 |
| C | -1.976243 | 1.390665  | 0.160143  |
| C | -3.120576 | -0.891785 | 0.187355  |
| O | -3.041424 | 1.823605  | -0.507466 |
| O | -1.182749 | 2.134043  | 0.689285  |
| O | -4.147702 | -0.497504 | 0.683440  |
| O | -2.981802 | -2.118850 | -0.320932 |
| C | -4.097604 | -2.989729 | -0.195724 |
| H | -4.332384 | -3.170881 | 0.862818  |
| H | -3.810049 | -3.927003 | -0.683244 |
| H | -4.981752 | -2.562067 | -0.688186 |
| C | -3.254671 | 3.228152  | -0.535442 |
| H | -3.354009 | 3.627502  | 0.483524  |
| H | -4.184056 | 3.384216  | -1.092621 |
| H | -2.420438 | 3.737793  | -1.038016 |
| C | 0.656646  | -0.129211 | 0.062308  |
| H | 0.725624  | 0.955889  | 0.150505  |
| C | 1.759981  | -0.902956 | -0.019704 |
| H | 1.621029  | -1.988149 | -0.089650 |
| C | 3.156351  | -0.453635 | -0.025165 |
| C | 4.175093  | -1.416830 | -0.109525 |
| C | 3.522207  | 0.902114  | 0.053056  |
| C | 5.517020  | -1.042840 | -0.114390 |
| H | 3.907556  | -2.474776 | -0.172060 |
| C | 4.861836  | 1.275255  | 0.048166  |
| H | 2.754752  | 1.675486  | 0.118691  |
| C | 5.863995  | 0.305241  | -0.035401 |
| H | 6.294080  | -1.807149 | -0.179427 |
| H | 5.127957  | 2.332459  | 0.111300  |
| H | 6.914980  | 0.602284  | -0.038425 |

50

Figure\_S10-1\_dienoate-Naborate / electronic energy: -1486.89608401 a.u. / lowest freq: 15.45 cm-1

|   |           |           |          |
|---|-----------|-----------|----------|
| H | -4.420128 | 2.087873  | 2.299924 |
| H | -5.923773 | -2.547792 | 1.430468 |
| C | -3.899637 | 1.709040  | 1.397197 |
| O | -6.388627 | -0.555754 | 1.056848 |
| H | -2.832933 | 1.979558  | 1.487735 |

|    |           |           |           |
|----|-----------|-----------|-----------|
| O  | -4.052556 | 0.323170  | 1.268895  |
| C  | -6.462160 | -1.902837 | 0.702697  |
| H  | -7.509160 | -2.251286 | 0.668862  |
| Na | -2.589162 | -0.954460 | 0.028443  |
| B  | -5.242902 | 0.056168  | 0.401101  |
| C  | -4.549382 | 2.260434  | 0.125108  |
| H  | -4.940007 | 3.284567  | 0.257486  |
| O  | -5.580090 | 1.360046  | -0.149654 |
| C  | -5.777159 | -1.970930 | -0.665207 |
| O  | -4.794555 | -0.975836 | -0.589590 |
| H  | -3.802053 | 2.287356  | -0.695287 |
| H  | -6.503487 | -1.753783 | -1.474182 |
| H  | -5.329092 | -2.957849 | -0.872632 |
| C  | 2.217972  | 0.782767  | -0.357663 |
| C  | 0.968244  | 0.253780  | -0.477916 |
| H  | 2.268783  | 1.873090  | -0.426363 |
| C  | 0.656300  | -1.199329 | -0.386928 |
| C  | -0.192151 | 1.162783  | -0.688524 |
| O  | 1.634875  | -1.973268 | -0.831358 |
| O  | -0.381350 | -1.656994 | 0.046156  |
| O  | -1.335622 | 0.796830  | -0.869352 |
| O  | 0.144585  | 2.445194  | -0.682767 |
| C  | -0.892656 | 3.394615  | -0.904656 |
| H  | -1.373335 | 3.224078  | -1.877338 |
| H  | -0.410674 | 4.376881  | -0.885452 |
| H  | -1.650282 | 3.328425  | -0.112354 |
| C  | 1.442759  | -3.383139 | -0.742768 |
| H  | 1.291967  | -3.686873 | 0.301829  |
| H  | 2.354400  | -3.836025 | -1.144545 |
| H  | 0.572193  | -3.688467 | -1.338576 |
| C  | 3.478653  | 0.126613  | -0.118869 |
| H  | 3.499709  | -0.957579 | -0.015571 |
| C  | 4.611174  | 0.860860  | -0.028545 |
| H  | 4.527241  | 1.946558  | -0.152174 |
| C  | 5.966988  | 0.366461  | 0.217775  |
| C  | 7.021202  | 1.293347  | 0.272402  |
| C  | 6.260030  | -0.996390 | 0.405467  |
| C  | 8.328905  | 0.875902  | 0.507087  |
| H  | 6.809143  | 2.355652  | 0.127725  |
| C  | 7.565616  | -1.412370 | 0.640052  |
| H  | 5.462269  | -1.740462 | 0.369434  |
| C  | 8.603756  | -0.478381 | 0.691959  |
| H  | 9.135264  | 1.610831  | 0.545810  |
| H  | 7.777281  | -2.473596 | 0.785169  |
| H  | 9.627956  | -0.809398 | 0.876235  |

56

Figure\_S10-1\_SIMes-Cu-allenyl / electronic energy: -2680.78923765 a.u. / lowest freq: 16.67 cm-1

|    |           |           |           |
|----|-----------|-----------|-----------|
| C  | 0.255100  | -2.802091 | 0.505112  |
| H  | 0.668208  | -3.196427 | 1.444813  |
| C  | -1.270500 | -2.619391 | 0.554864  |
| H  | -1.800083 | -3.253354 | -0.170485 |
| C  | -0.267703 | -0.553149 | 0.091367  |
| C  | -2.705673 | -0.570588 | 0.110299  |
| C  | -3.379878 | -0.614762 | -1.117966 |
| C  | -3.248840 | 0.082482  | 1.227243  |
| C  | -4.637370 | -0.011781 | -1.202344 |
| C  | -4.506955 | 0.673704  | 1.096602  |
| C  | -5.220520 | 0.629249  | -0.105733 |
| Cu | 0.110016  | 1.307604  | -0.228361 |
| N  | 0.723169  | -1.433012 | 0.264097  |
| N  | -1.429749 | -1.197347 | 0.221108  |
| H  | -1.690544 | -2.824163 | 1.551562  |
| H  | 0.576639  | -3.468534 | -0.309931 |
| C  | 0.774672  | 3.096038  | -0.486998 |
| H  | 0.208773  | 4.016056  | -0.700711 |
| C  | 2.071525  | 3.214162  | -0.388898 |
| C  | 3.389142  | 3.271273  | -0.276397 |
| H  | 4.042154  | 3.124597  | -1.143427 |
| H  | 3.872005  | 3.450329  | 0.690170  |
| H  | -4.940744 | 1.189169  | 1.958286  |
| H  | -5.171125 | -0.034945 | -2.156636 |
| C  | -2.739174 | -1.258856 | -2.318184 |
| H  | -1.764393 | -0.794441 | -2.533026 |
| H  | -2.557008 | -2.332599 | -2.157552 |
| H  | -3.373859 | -1.155030 | -3.207828 |
| C  | -2.466468 | 0.177007  | 2.509466  |
| H  | -2.161688 | -0.814837 | 2.876499  |
| H  | -1.543922 | 0.758395  | 2.352392  |
| H  | -3.052793 | 0.668434  | 3.296712  |
| C  | 2.100609  | -1.074402 | 0.152530  |
| C  | 2.710868  | -1.089540 | -1.109969 |
| C  | 2.796150  | -0.676303 | 1.303159  |
| C  | 4.054490  | -0.718966 | -1.196317 |
| C  | 4.137867  | -0.315360 | 1.170431  |
| C  | 4.783410  | -0.329256 | -0.069282 |
| H  | 4.541691  | -0.721123 | -2.175444 |
| H  | 4.690272  | 0.002663  | 2.059240  |
| C  | 1.914463  | -1.435151 | -2.339256 |
| H  | 1.411113  | -2.409070 | -2.245646 |

|   |           |           |           |
|---|-----------|-----------|-----------|
| H | 1.129881  | -0.679297 | -2.505515 |
| H | 2.554756  | -1.464444 | -3.230551 |
| C | 2.087510  | -0.585650 | 2.627443  |
| H | 1.295980  | 0.179314  | 2.581836  |
| H | 1.603679  | -1.535221 | 2.901538  |
| H | 2.783525  | -0.310564 | 3.430477  |
| C | -6.591070 | 1.245868  | -0.208877 |
| H | -6.854724 | 1.465524  | -1.252764 |
| H | -7.356052 | 0.560144  | 0.189860  |
| H | -6.655115 | 2.179427  | 0.368353  |
| C | 6.214528  | 0.121736  | -0.194929 |
| H | 6.791322  | -0.109785 | 0.711774  |
| H | 6.712484  | -0.348829 | -1.054371 |
| H | 6.258068  | 1.212948  | -0.343793 |

106

Figure\_S10-1\_PA-SIMes(Naborate)-ed(1,6) / electronic energy: -4167.72984142 a.u. / lowest freq: 15.67 cm-1

|    |           |           |           |
|----|-----------|-----------|-----------|
| C  | -0.908032 | 1.743554  | 3.577161  |
| H  | -1.874873 | 1.278942  | 3.826794  |
| C  | 0.291319  | 0.862313  | 3.956263  |
| H  | 1.053361  | 1.413080  | 4.527899  |
| C  | 0.208121  | 1.092135  | 1.625601  |
| C  | 1.844946  | -0.499626 | 2.464151  |
| C  | 1.459344  | -1.832551 | 2.241745  |
| C  | 3.194398  | -0.124516 | 2.527962  |
| C  | 3.815745  | -2.445807 | 2.082551  |
| Cu | 0.980742  | 1.136268  | -0.190580 |
| N  | -0.767917 | 1.858850  | 2.118438  |
| N  | 0.821139  | 0.478664  | 2.641928  |
| C  | 1.603344  | 0.443008  | -1.983620 |
| C  | 0.301630  | -0.108416 | -1.750044 |
| H  | 0.006005  | -0.026639 | 4.537031  |
| H  | -0.873389 | 2.734290  | 4.050714  |
| H  | 1.639312  | 1.291448  | -2.668615 |
| C  | 0.020924  | -1.511992 | -1.378981 |
| C  | -0.851505 | 0.685195  | -2.254380 |
| O  | 1.109234  | -2.262582 | -1.246759 |
| O  | -1.089377 | -1.987814 | -1.217962 |
| O  | -1.982231 | 0.285162  | -2.453566 |
| O  | -0.519720 | 1.955690  | -2.479628 |
| C  | -1.539970 | 2.827821  | -2.949353 |
| H  | -1.946410 | 2.470408  | -3.905369 |
| H  | -1.061663 | 3.803624  | -3.080840 |
| H  | -2.347081 | 2.898321  | -2.209001 |
| C  | 0.922788  | -3.646019 | -0.980820 |
| H  | 0.328102  | -3.795681 | -0.071117 |
| H  | 1.926198  | -4.064449 | -0.850781 |
| H  | 0.415578  | -4.133077 | -1.825231 |
| C  | 2.886056  | -0.172176 | -1.696501 |
| H  | 2.915657  | -1.001659 | -0.990408 |
| C  | 4.027265  | 0.294287  | -2.246849 |
| H  | 3.959025  | 1.108225  | -2.975794 |
| C  | 5.378857  | -0.225318 | -2.002819 |
| C  | 6.437660  | 0.207614  | -2.816236 |
| C  | 5.661124  | -1.142977 | -0.977005 |
| C  | 7.733359  | -0.266865 | -2.621337 |
| H  | 6.238270  | 0.928984  | -3.613106 |
| C  | 6.954300  | -1.615215 | -0.779856 |
| H  | 4.863183  | -1.473396 | -0.310365 |
| C  | 7.996919  | -1.181847 | -1.602560 |
| H  | 8.541397  | 0.081344  | -3.268453 |
| H  | 7.152916  | -2.325303 | 0.026093  |
| H  | 9.011406  | -1.554656 | -1.445885 |
| C  | 2.108688  | 2.769125  | -0.228970 |
| H  | 1.527641  | 3.686118  | -0.048742 |
| C  | 3.391830  | 2.866153  | -0.384617 |
| C  | 4.705479  | 2.873320  | -0.534187 |
| H  | 5.169696  | 2.999827  | -1.517212 |
| H  | 5.375640  | 2.765543  | 0.325441  |
| C  | 2.459595  | -2.786794 | 2.053781  |
| H  | 2.174262  | -3.829494 | 1.889306  |
| C  | 4.161047  | -1.114153 | 2.325577  |
| H  | 5.217261  | -0.833242 | 2.362867  |
| C  | 0.003991  | -2.216389 | 2.214080  |
| H  | -0.537546 | -1.825938 | 3.088183  |
| H  | -0.503202 | -1.814319 | 1.324366  |
| H  | -0.116672 | -3.307982 | 2.207579  |
| C  | 3.589344  | 1.294990  | 2.829165  |
| H  | 3.038789  | 2.001668  | 2.192713  |
| H  | 3.378295  | 1.546642  | 3.880897  |
| H  | 4.663474  | 1.445757  | 2.659611  |
| C  | -1.786359 | 2.456640  | 1.317426  |
| C  | -1.798616 | 3.842009  | 1.116130  |
| C  | -2.788135 | 1.623876  | 0.788456  |
| C  | -2.840757 | 4.385524  | 0.355619  |
| C  | -3.810651 | 2.208127  | 0.042461  |
| C  | -3.853952 | 3.589133  | -0.182933 |
| H  | -4.587746 | 1.558446  | -0.369811 |
| C  | -0.739329 | 4.723080  | 1.721383  |
| H  | -0.637881 | 5.662864  | 1.162104  |

|    |           |           |           |
|----|-----------|-----------|-----------|
| H  | -0.994791 | 4.984580  | 2.761369  |
| H  | 0.236959  | 4.219743  | 1.743731  |
| C  | -2.752209 | 0.138883  | 1.009474  |
| H  | -1.972606 | -0.321250 | 0.382397  |
| H  | -2.509928 | -0.115833 | 2.051301  |
| H  | -3.715846 | -0.322533 | 0.760367  |
| C  | 4.871901  | -3.492073 | 1.840567  |
| H  | 4.612770  | -4.443252 | 2.327210  |
| H  | 4.978624  | -3.697486 | 0.762599  |
| H  | 5.852455  | -3.168198 | 2.216614  |
| C  | -4.970888 | 4.188174  | -0.996983 |
| H  | -4.829183 | 5.266970  | -1.148224 |
| H  | -5.038285 | 3.709192  | -1.986012 |
| H  | -5.942169 | 4.038412  | -0.500605 |
| H  | -2.858464 | 5.465312  | 0.182034  |
| Na | -3.263373 | -1.478165 | -1.811538 |
| B  | -5.371878 | -2.401991 | -0.145528 |
| O  | -5.268814 | -1.052652 | -0.789637 |
| O  | -4.947835 | -2.464831 | 1.248104  |
| O  | -4.386898 | -3.269419 | -0.861110 |
| C  | -3.768356 | -3.204319 | 1.357365  |
| C  | -3.735061 | -4.064984 | 0.090831  |
| O  | -6.774432 | -2.757271 | -0.294907 |
| C  | -6.556416 | -0.603597 | -1.106539 |
| C  | -7.368840 | -1.897380 | -1.218931 |
| H  | -3.758196 | -3.808832 | 2.281290  |
| H  | -2.878198 | -2.542307 | 1.383977  |
| H  | -4.273525 | -5.020608 | 0.249095  |
| H  | -2.707857 | -4.302272 | -0.233178 |
| H  | -6.553434 | -0.015331 | -2.040133 |
| H  | -6.958945 | 0.043354  | -0.301539 |
| H  | -7.302244 | -2.299799 | -2.252328 |
| H  | -8.438493 | -1.746103 | -0.993694 |

106

Figure\_S10-1\_PA-SIMes(Naborate)-ts(1,6) / electronic energy: -4167.72041851 a.u. / lowest freq: -419.80 cm<sup>-1</sup>

|    |           |           |           |
|----|-----------|-----------|-----------|
| C  | -0.891009 | 1.770988  | 3.591828  |
| H  | -1.850548 | 1.288868  | 3.836756  |
| C  | 0.322183  | 0.913475  | 3.980342  |
| H  | 1.070669  | 1.479295  | 4.555165  |
| C  | 0.243167  | 1.126691  | 1.647091  |
| C  | 1.902029  | -0.431762 | 2.505604  |
| C  | 1.534496  | -1.767401 | 2.271750  |
| C  | 3.245961  | -0.042542 | 2.593725  |
| C  | 3.899117  | -2.358523 | 2.167181  |
| Cu | 0.945276  | 1.129521  | -0.193607 |
| N  | -0.744941 | 1.883708  | 2.133451  |
| N  | 0.866098  | 0.535171  | 2.669826  |
| C  | 1.575019  | 0.416170  | -2.032692 |
| C  | 0.250515  | -0.130118 | -1.801979 |
| H  | 0.050129  | 0.020571  | 4.561463  |
| H  | -0.879402 | 2.764183  | 4.061868  |
| H  | 1.599926  | 1.260529  | -2.725470 |
| C  | -0.013040 | -1.519274 | -1.423519 |
| C  | -0.886661 | 0.664216  | -2.293348 |
| O  | 1.093645  | -2.231283 | -1.190787 |
| O  | -1.113339 | -2.043424 | -1.322753 |
| O  | -2.033854 | 0.288706  | -2.469274 |
| O  | -0.545036 | 1.937140  | -2.540873 |
| C  | -1.565346 | 2.808930  | -3.002616 |
| H  | -1.993719 | 2.445647  | -3.947197 |
| H  | -1.083691 | 3.780493  | -3.155771 |
| H  | -2.361128 | 2.897909  | -2.251568 |
| C  | 0.936187  | -3.617949 | -0.938901 |
| H  | 0.305376  | -3.793315 | -0.057820 |
| H  | 1.944486  | -4.008415 | -0.763864 |
| H  | 0.483118  | -4.120330 | -1.805247 |
| C  | 2.832396  | -0.091943 | -1.657242 |
| H  | 2.892545  | -0.924132 | -0.955825 |
| C  | 4.003165  | 0.501087  | -2.132517 |
| H  | 3.900655  | 1.116547  | -3.028973 |
| C  | 5.338932  | -0.110292 | -1.958780 |
| C  | 6.349284  | 0.159350  | -2.893265 |
| C  | 5.640313  | -0.950415 | -0.875871 |
| C  | 7.618716  | -0.400784 | -2.758493 |
| H  | 6.133764  | 0.816770  | -3.740020 |
| C  | 6.908808  | -1.506310 | -0.737912 |
| H  | 4.878529  | -1.155069 | -0.121584 |
| C  | 7.904416  | -1.236715 | -1.679558 |
| H  | 8.388875  | -0.181422 | -3.501356 |
| H  | 7.124691  | -2.153675 | 0.115122  |
| H  | 8.898505  | -1.675282 | -1.569401 |
| C  | 2.054408  | 2.853980  | -0.144623 |
| H  | 1.476504  | 3.622162  | 0.368953  |
| C  | 3.250346  | 2.805002  | -0.553871 |
| C  | 4.457419  | 2.417100  | -1.036265 |
| H  | 4.851640  | 2.875957  | -1.946694 |
| H  | 5.206898  | 2.058728  | -0.323060 |
| C  | 2.547540  | -2.711404 | 2.102648  |
| H  | 2.275462  | -3.755148 | 1.923182  |

|    |           |           |           |
|----|-----------|-----------|-----------|
| C  | 4.226297  | -1.024036 | 2.420907  |
| H  | 5.278915  | -0.733566 | 2.482329  |
| C  | 0.084642  | -2.163917 | 2.203286  |
| H  | -0.490989 | -1.759148 | 3.048384  |
| H  | -0.391659 | -1.783790 | 1.286835  |
| H  | -0.027409 | -3.256185 | 2.215559  |
| C  | 3.621177  | 1.386505  | 2.876440  |
| H  | 3.065925  | 2.076370  | 2.225743  |
| H  | 3.399158  | 1.655510  | 3.921569  |
| H  | 4.694643  | 1.549075  | 2.712350  |
| C  | -1.774838 | 2.455443  | 1.327274  |
| C  | -1.828116 | 3.839306  | 1.125700  |
| C  | -2.751331 | 1.594149  | 0.791863  |
| C  | -2.881616 | 4.352130  | 0.357762  |
| C  | -3.784622 | 2.148276  | 0.039981  |
| C  | -3.866718 | 3.527773  | -0.187062 |
| H  | -4.539166 | 1.475445  | -0.376739 |
| C  | -0.808183 | 4.769224  | 1.727798  |
| H  | -0.504087 | 5.539174  | 1.004478  |
| H  | -1.225989 | 5.290600  | 2.603695  |
| H  | 0.089207  | 4.231259  | 2.061450  |
| C  | -2.676767 | 0.110012  | 1.007569  |
| H  | -1.901185 | -0.329083 | 0.360895  |
| H  | -2.407938 | -0.143478 | 2.043051  |
| H  | -3.634399 | -0.371542 | 0.774448  |
| C  | 4.969868  | -3.392512 | 1.939228  |
| H  | 4.710875  | -4.350007 | 2.413368  |
| H  | 5.097322  | -3.586484 | 0.861532  |
| H  | 5.940131  | -3.062193 | 2.335933  |
| C  | -4.996174 | 4.092812  | -1.007949 |
| H  | -4.881492 | 5.173969  | -1.165439 |
| H  | -5.048334 | 3.605855  | -1.993931 |
| H  | -5.964725 | 3.921518  | -0.513104 |
| H  | -2.929699 | 5.431315  | 0.185478  |
| Na | -3.278640 | -1.495288 | -1.852541 |
| B  | -5.310157 | -2.451252 | -0.105513 |
| O  | -5.234076 | -1.090907 | -0.731673 |
| O  | -4.822550 | -2.537371 | 1.265501  |
| O  | -4.363765 | -3.308195 | -0.880815 |
| C  | -3.627867 | -3.259961 | 1.302206  |
| C  | -3.649601 | -4.104900 | 0.024835  |
| O  | -6.719829 | -2.799950 | -0.195052 |
| C  | -6.533189 | -0.633127 | -0.979081 |
| C  | -7.355449 | -1.922248 | -1.073444 |
| H  | -3.560234 | -3.874554 | 2.217015  |
| H  | -2.747148 | -2.585129 | 1.288402  |
| H  | -4.164923 | -5.070660 | 0.199037  |
| H  | -2.638054 | -4.320178 | -0.357653 |
| H  | -6.572832 | -0.029594 | -1.902184 |
| H  | -6.894886 | 0.002040  | -0.145570 |
| H  | -7.342284 | -2.306620 | -2.115802 |
| H  | -8.412119 | -1.771278 | -0.792977 |

106

Figure\_S10-1\_PA-SIMes(Naborate)-prod(1,6) / electronic energy: -4167.77319994 a.u. / lowest freq: 11.49 cm<sup>-1</sup>

|    |           |           |           |
|----|-----------|-----------|-----------|
| C  | -0.522938 | 2.673260  | 3.142399  |
| H  | -1.442902 | 2.283513  | 3.603903  |
| C  | 0.747336  | 2.001699  | 3.685535  |
| H  | 1.476727  | 2.728463  | 4.071166  |
| C  | 0.534363  | 1.518639  | 1.400742  |
| C  | 2.410379  | 0.461453  | 2.543070  |
| C  | 2.205091  | -0.926937 | 2.589085  |
| C  | 3.698322  | 1.016456  | 2.550174  |
| C  | 4.625176  | -1.240643 | 2.657829  |
| Cu | 0.905229  | 0.797313  | -0.351975 |
| N  | -0.488631 | 2.314365  | 1.718627  |
| N  | 1.275220  | 1.321773  | 2.495371  |
| C  | 1.258485  | -0.085053 | -2.181693 |
| C  | -0.101741 | -0.584776 | -1.949713 |
| H  | 0.539571  | 1.270941  | 4.480794  |
| H  | -0.513756 | 3.765137  | 3.268825  |
| H  | 1.312781  | 0.664868  | -2.976640 |
| C  | -0.396843 | -1.847829 | -1.307389 |
| C  | -1.196082 | 0.144370  | -2.569311 |
| O  | 0.688689  | -2.443386 | -0.772927 |
| O  | -1.492144 | -2.388312 | -1.203002 |
| O  | -2.375970 | -0.181388 | -2.622569 |
| O  | -0.802841 | 1.312357  | -3.119330 |
| C  | -1.800230 | 2.095230  | -3.749181 |
| H  | -2.268008 | 1.549534  | -4.581296 |
| H  | -1.290426 | 2.987546  | -4.129739 |
| H  | -2.576620 | 2.387796  | -3.030063 |
| C  | 0.493062  | -3.703723 | -0.156480 |
| H  | -0.282138 | -3.649166 | 0.620567  |
| H  | 1.456626  | -3.973529 | 0.290846  |
| H  | 0.197748  | -4.461685 | -0.896220 |
| C  | 2.441643  | -0.352692 | -1.540524 |
| H  | 2.510469  | -1.146002 | -0.792548 |
| C  | 3.737067  | 0.296129  | -1.981279 |
| H  | 3.589078  | 0.710172  | -2.990646 |

|    |           |           |           |
|----|-----------|-----------|-----------|
| C  | 4.869718  | -0.710647 | -2.056047 |
| C  | 5.535250  | -0.945598 | -3.262917 |
| C  | 5.275323  | -1.420791 | -0.918317 |
| C  | 6.580374  | -1.867712 | -3.336509 |
| H  | 5.229693  | -0.401475 | -4.160727 |
| C  | 6.318928  | -2.341644 | -0.988044 |
| H  | 4.768475  | -1.254981 | 0.036051  |
| C  | 6.975713  | -2.568841 | -2.198633 |
| H  | 7.085608  | -2.038790 | -4.289774 |
| H  | 6.620467  | -2.886854 | -0.091068 |
| H  | 7.791261  | -3.293221 | -2.253476 |
| C  | 2.332763  | 3.455050  | -1.244122 |
| H  | 1.601813  | 4.237863  | -1.335575 |
| C  | 3.162002  | 2.578173  | -1.140254 |
| C  | 4.133967  | 1.488864  | -1.070538 |
| H  | 5.123751  | 1.867303  | -1.371976 |
| H  | 4.224346  | 1.144274  | -0.027886 |
| C  | 3.326283  | -1.757997 | 2.637301  |
| H  | 3.179777  | -2.841355 | 2.667575  |
| C  | 4.790240  | 0.146297  | 2.609312  |
| H  | 5.800046  | 0.566161  | 2.603187  |
| C  | 0.813382  | -1.498787 | 2.571108  |
| H  | 0.167421  | -1.018678 | 3.321067  |
| H  | 0.338989  | -1.339237 | 1.590897  |
| H  | 0.828128  | -2.578155 | 2.768971  |
| C  | 3.899263  | 2.506150  | 2.472725  |
| H  | 3.225123  | 2.959251  | 1.730765  |
| H  | 3.698198  | 2.988650  | 3.442558  |
| H  | 4.933997  | 2.747403  | 2.194806  |
| C  | -1.577927 | 2.605041  | 0.844178  |
| C  | -1.690030 | 3.883590  | 0.278264  |
| C  | -2.532811 | 1.604182  | 0.600991  |
| C  | -2.783279 | 4.141540  | -0.552875 |
| C  | -3.611751 | 1.908741  | -0.230700 |
| C  | -3.755144 | 3.170516  | -0.812776 |
| H  | -4.351919 | 1.126797  | -0.417172 |
| C  | -0.671425 | 4.953431  | 0.569178  |
| H  | -0.625543 | 5.688295  | -0.246277 |
| H  | -0.928627 | 5.503158  | 1.489386  |
| H  | 0.329646  | 4.524459  | 0.716537  |
| C  | -2.396633 | 0.227014  | 1.186041  |
| H  | -1.697683 | -0.369513 | 0.577922  |
| H  | -1.991340 | 0.246094  | 2.207726  |
| H  | -3.360731 | -0.297497 | 1.200994  |
| C  | 5.817832  | -2.155819 | 2.746123  |
| H  | 6.076246  | -2.354137 | 3.798751  |
| H  | 5.615735  | -3.126075 | 2.270316  |
| H  | 6.701797  | -1.709923 | 2.268482  |
| C  | -4.942550 | 3.479571  | -1.687117 |
| H  | -4.700213 | 4.240426  | -2.442924 |
| H  | -5.302177 | 2.578074  | -2.203519 |
| H  | -5.779370 | 3.868452  | -1.084703 |
| H  | -2.876400 | 5.130065  | -1.012230 |
| Na | -3.627937 | -1.683062 | -1.499843 |
| B  | -5.256376 | -2.355059 | 0.733585  |
| O  | -5.280071 | -1.072405 | -0.043071 |
| O  | -4.458195 | -2.330831 | 1.954794  |
| O  | -4.560255 | -3.345305 | -0.135619 |
| C  | -3.327401 | -3.137273 | 1.801032  |
| C  | -3.693370 | -4.099623 | 0.666919  |
| O  | -6.659735 | -2.616461 | 1.019374  |
| C  | -6.581870 | -0.558097 | -0.028942 |
| C  | -7.452288 | -1.794164 | 0.218922  |
| H  | -3.080891 | -3.662299 | 2.740634  |
| H  | -2.439928 | -2.537881 | 1.507877  |
| H  | -4.201652 | -5.001171 | 1.064501  |
| H  | -2.811536 | -4.424737 | 0.091140  |
| H  | -6.817836 | -0.049419 | -0.979530 |
| H  | -6.706996 | 0.180615  | 0.788200  |
| H  | -7.702656 | -2.282271 | -0.747177 |
| H  | -8.404439 | -1.547963 | 0.719769  |

106

Figure\_S10-1\_PA-SIMes(Naborate)-ed(1,4AA) / electronic energy: -4167.73112443 a.u. / lowest freq: 14.64 cm<sup>-1</sup>

|   |           |          |           |
|---|-----------|----------|-----------|
| H | 2.828236  | 4.129247 | 1.574539  |
| C | 2.785534  | 3.370824 | 0.787306  |
| H | 0.673226  | 4.933337 | 0.988284  |
| H | 0.431128  | 2.954346 | 3.888704  |
| H | 2.008889  | 2.488474 | 3.149785  |
| C | 1.600278  | 3.221723 | 0.061221  |
| C | 0.391794  | 4.058409 | 0.387007  |
| H | -2.422259 | 4.716065 | 2.716256  |
| H | 1.381157  | 1.582551 | 4.564465  |
| C | 1.102918  | 2.123389 | 3.648797  |
| H | -0.118940 | 4.412221 | -0.520561 |
| H | -2.416532 | 3.473901 | 4.113955  |
| H | -0.347032 | 3.479567 | 0.964874  |
| C | -2.498418 | 3.672146 | 3.039724  |
| C | 1.565811  | 2.253446 | -0.955045 |
| O | 0.363962  | 1.275354 | 2.781123  |

|    |           |           |           |
|----|-----------|-----------|-----------|
| H  | 0.262083  | 3.776631  | -2.998124 |
| C  | -2.696986 | 2.693425  | 2.169762  |
| N  | 0.380539  | 2.092146  | -1.729669 |
| C  | 0.995899  | 0.257760  | 2.203457  |
| C  | 0.235226  | 2.677423  | -3.070152 |
| H  | 1.049345  | 2.358060  | -3.733362 |
| H  | -3.058791 | 3.572475  | -0.795706 |
| C  | -0.750512 | 1.547972  | -1.278359 |
| Cu | -1.233193 | 0.835593  | 0.505056  |
| C  | -2.814621 | 1.731802  | 1.305812  |
| H  | -3.382251 | 3.870221  | -2.517985 |
| H  | -1.464674 | -0.131152 | 2.854554  |
| C  | -3.787831 | 3.409235  | -1.604527 |
| H  | -4.715143 | 3.935412  | -1.342618 |
| C  | 0.051257  | -0.590088 | 1.418172  |
| C  | -1.134697 | 2.147144  | -3.509063 |
| H  | -1.789482 | 2.931969  | -3.911214 |
| C  | -1.293129 | -0.625824 | 1.897291  |
| H  | -3.811514 | 1.374907  | 1.008204  |
| N  | -1.665899 | 1.606967  | -2.252395 |
| H  | -1.056546 | 1.348029  | -4.263494 |
| C  | 0.672324  | -1.516496 | 0.448235  |
| C  | -4.034783 | 1.936775  | -1.781777 |
| C  | -2.982194 | 1.072597  | -2.109313 |
| H  | -3.722912 | -0.846579 | 2.923959  |
| C  | -2.376763 | -1.492361 | 1.443907  |
| C  | -3.579410 | -1.495669 | 2.053183  |
| H  | -6.125190 | 2.043281  | -1.289911 |
| H  | -1.253897 | -1.181508 | -1.824080 |
| C  | -5.298861 | 1.381085  | -1.563432 |
| H  | -2.205638 | -2.099831 | 0.557497  |
| O  | -0.170487 | -2.405785 | -0.076540 |
| C  | -3.178688 | -0.310766 | -2.243754 |
| C  | -2.030706 | -1.215301 | -2.600505 |
| H  | -1.557398 | -0.918377 | -3.548671 |
| H  | -6.024435 | -1.327120 | 3.111567  |
| C  | -5.525151 | 0.005856  | -1.655400 |
| C  | -4.756920 | -2.267027 | 1.637118  |
| C  | -4.454794 | -0.822098 | -2.009764 |
| C  | -5.977145 | -2.058316 | 2.300610  |
| H  | -2.365078 | -2.256667 | -2.698819 |
| H  | -6.853015 | -1.087090 | -0.365138 |
| H  | -3.787537 | -3.403591 | 0.063695  |
| C  | -6.873257 | -0.587774 | -1.347006 |
| H  | -0.477759 | -3.959889 | -1.327757 |
| C  | -4.721460 | -3.210903 | 0.595131  |
| H  | -7.657946 | 0.180758  | -1.320696 |
| H  | -4.620437 | -1.899078 | -2.098139 |
| C  | -7.123296 | -2.763337 | 1.937462  |
| H  | -8.062098 | -2.582517 | 2.465137  |
| H  | -7.156083 | -1.347958 | -2.089860 |
| C  | -5.864439 | -3.914553 | 0.232298  |
| C  | -7.071088 | -3.694667 | 0.901419  |
| H  | -5.815436 | -4.644613 | -0.578514 |
| H  | -7.967359 | -4.248421 | 0.614035  |
| H  | 5.200914  | 3.664794  | 1.896521  |
| C  | 5.153920  | 2.700692  | 1.371173  |
| H  | 5.176208  | 1.904519  | 2.133531  |
| H  | 6.061854  | 2.589077  | 0.761829  |
| C  | 3.909521  | 2.583029  | 0.531558  |
| C  | 3.844141  | 1.642177  | -0.499977 |
| H  | 4.711449  | 1.006224  | -0.699823 |
| C  | 2.682594  | 1.455083  | -1.250359 |
| H  | 3.456476  | -0.313210 | -2.205979 |
| C  | 2.645379  | 0.416631  | -2.338788 |
| H  | 2.773739  | 0.877097  | -3.332112 |
| H  | 1.685820  | -0.119894 | -2.342511 |
| O  | 1.843529  | -1.501764 | 0.125696  |
| H  | 0.739242  | -2.772587 | -1.914248 |
| O  | 2.187669  | 0.077190  | 2.349376  |
| C  | 0.356169  | -3.312628 | -1.037172 |
| H  | 1.167472  | -3.910873 | -0.602277 |
| Na | 3.849689  | -0.875718 | 1.086586  |
| B  | 5.864598  | -2.063255 | -0.500210 |
| O  | 5.904373  | -0.685234 | 0.064498  |
| O  | 5.239970  | -2.180542 | -1.814245 |
| O  | 4.964256  | -2.850930 | 0.392036  |
| C  | 4.178486  | -3.092567 | -1.767866 |
| C  | 4.326078  | -3.799959 | -0.412988 |
| O  | 7.259475  | -2.483972 | -0.515983 |
| C  | 7.235478  | -0.324395 | 0.311407  |
| C  | 7.975545  | -1.666607 | 0.358022  |
| H  | 4.221024  | -3.802881 | -2.613059 |
| H  | 3.206051  | -2.566215 | -1.815843 |
| H  | 4.942223  | -4.716413 | -0.511754 |
| H  | 3.356198  | -4.093202 | 0.022243  |
| H  | 7.325830  | 0.243242  | 1.253110  |
| H  | 7.626718  | 0.314015  | -0.505351 |
| H  | 7.968846  | -2.069415 | 1.393277  |



H 9.030639 -1.576405 0.047354

106

Figure\_S10-1\_PA-SIMes(Naborate)-ts(1.4AA) / electronic energy: -4167.71268692 a.u. / lowest freq: -301.99 cm-1

|    |           |           |           |
|----|-----------|-----------|-----------|
| H  | -6.638772 | -1.150855 | -1.344087 |
| H  | -8.128633 | -2.622996 | 0.461905  |
| H  | -6.810409 | -0.597595 | 0.345837  |
| C  | -6.440553 | -1.424312 | -0.293386 |
| H  | -7.118716 | -3.442050 | -0.760025 |
| C  | -7.090517 | -2.751528 | 0.109850  |
| O  | -5.075453 | -1.648501 | -0.080185 |
| Na | -3.144267 | -2.136720 | -1.210925 |
| O  | -6.270268 | -3.239930 | 1.126867  |
| B  | -4.915652 | -2.744319 | 0.930088  |
| O  | -3.938717 | -3.704053 | 0.341800  |
| O  | -4.303644 | -2.344309 | 2.192723  |
| H  | -3.458677 | -5.020945 | 1.873248  |
| C  | -3.068312 | -4.119599 | 1.359344  |
| C  | -3.035829 | -2.920195 | 2.311017  |
| H  | -2.825686 | -3.210827 | 3.355400  |
| H  | -2.239973 | -2.214906 | 1.992262  |
| H  | -2.074055 | -4.357520 | 0.948167  |
| C  | -1.230774 | 3.298087  | 2.588593  |
| H  | -2.135400 | 2.874697  | 3.050862  |
| C  | 0.061414  | 2.867173  | 3.304485  |
| H  | 0.676782  | 3.724355  | 3.615066  |
| C  | 0.075522  | 2.042476  | 1.112445  |
| C  | 1.952959  | 1.354866  | 2.466226  |
| C  | 1.863736  | 0.001803  | 2.830508  |
| C  | 3.185805  | 1.983221  | 2.249161  |
| C  | 4.299314  | -0.131606 | 2.747077  |
| Cu | 0.760382  | 1.132167  | -0.448305 |
| N  | -1.050093 | 2.745433  | 1.238385  |
| N  | 0.745928  | 2.088959  | 2.265661  |
| C  | 1.609395  | -0.040422 | -1.926403 |
| C  | 0.273117  | -0.589300 | -1.554415 |
| H  | -0.128436 | 2.247535  | 4.193257  |
| H  | -1.349685 | 4.390079  | 2.548507  |
| H  | 1.637307  | 0.216104  | -2.987065 |
| C  | 0.062852  | -1.726060 | -0.669182 |
| C  | -0.858885 | -0.141224 | -2.364903 |
| O  | 1.138103  | -2.059225 | 0.061093  |
| O  | -0.973415 | -2.365465 | -0.550208 |
| O  | -1.981432 | -0.618651 | -2.422829 |
| O  | -0.548500 | 0.943774  | -3.098328 |
| C  | -1.577802 | 1.496164  | -3.903148 |
| H  | -1.913300 | 0.775006  | -4.661665 |
| H  | -1.141583 | 2.375633  | -4.389109 |
| H  | -2.432964 | 1.794668  | -3.282342 |
| C  | 1.049023  | -3.237344 | 0.843521  |
| H  | 0.212829  | -3.181520 | 1.553567  |
| H  | 1.999136  | -3.310977 | 1.383957  |
| H  | 0.912906  | -4.121411 | 0.204256  |
| C  | 2.864278  | -0.683492 | -1.467762 |
| H  | 3.026396  | -0.760868 | -0.391129 |
| C  | 3.792546  | -1.127030 | -2.324360 |
| H  | 3.591655  | -1.060730 | -3.400060 |
| C  | 5.084020  | -1.731417 | -1.952792 |
| C  | 5.794381  | -2.473193 | -2.908717 |
| C  | 5.644526  | -1.587172 | -0.671754 |
| C  | 7.013760  | -3.071164 | -2.594786 |
| H  | 5.377061  | -2.588342 | -3.912651 |
| C  | 6.862852  | -2.182794 | -0.358553 |
| H  | 5.129502  | -0.984935 | 0.080547  |
| C  | 7.552167  | -2.930008 | -1.316664 |
| H  | 7.546605  | -3.648553 | -3.353637 |
| H  | 7.285711  | -2.055458 | 0.640494  |
| H  | 8.509038  | -3.393971 | -1.068098 |
| C  | 2.110130  | 1.963819  | -1.687546 |
| H  | 1.540410  | 2.590620  | -2.385122 |
| C  | 3.370635  | 2.192172  | -1.454844 |
| C  | 4.660653  | 2.318829  | -1.238396 |
| H  | 5.049708  | 2.905523  | -0.401063 |
| H  | 5.385078  | 1.833431  | -1.901371 |
| C  | 3.049191  | -0.722268 | 2.961690  |
| H  | 2.996839  | -1.777805 | 3.243534  |
| C  | 4.347375  | 1.218940  | 2.391308  |
| H  | 5.317093  | 1.693106  | 2.216519  |
| C  | 0.522513  | -0.645353 | 3.044939  |
| H  | -0.112998 | -0.056323 | 3.722088  |
| H  | -0.023637 | -0.734504 | 2.093654  |
| H  | 0.632937  | -1.650510 | 3.471409  |
| C  | 3.240006  | 3.431580  | 1.847213  |
| H  | 2.738021  | 3.581489  | 0.878616  |
| H  | 2.733010  | 4.074620  | 2.582047  |
| H  | 4.277589  | 3.779227  | 1.757750  |
| C  | -2.108604 | 2.713961  | 0.280851  |
| C  | -2.298435 | 3.802309  | -0.580429 |
| C  | -2.944003 | 1.585861  | 0.243788  |
| C  | -3.372154 | 3.752554  | -1.474945 |

|   |           |           |           |
|---|-----------|-----------|-----------|
| C | -4.000728 | 1.577118  | -0.666680 |
| C | -4.234681 | 2.653372  | -1.527605 |
| H | -3.532174 | 4.593570  | -2.155784 |
| H | -4.645225 | 0.695024  | -0.696970 |
| C | 5.561563  | -0.932776 | 2.930383  |
| H | 5.794088  | -1.052168 | 4.000530  |
| H | 5.457775  | -1.942323 | 2.505938  |
| H | 6.422974  | -0.442712 | 2.455099  |
| C | -2.681989 | 0.394037  | 1.120174  |
| H | -1.834371 | -0.181281 | 0.713469  |
| H | -2.408798 | 0.680067  | 2.146259  |
| H | -3.550083 | -0.275990 | 1.164062  |
| C | -1.352455 | 4.973102  | -0.552212 |
| H | -1.390069 | 5.501521  | 0.413012  |
| H | -0.312934 | 4.640320  | -0.696819 |
| H | -1.596898 | 5.697143  | -1.340466 |
| C | -5.370180 | 2.596997  | -2.515814 |
| H | -5.161038 | 1.857259  | -3.305463 |
| H | -6.306495 | 2.289880  | -2.026773 |
| H | -5.536526 | 3.568910  | -3.000497 |

106

Figure\_S10-1\_PA-SIMes(Naborate)-prod(1,4AA) / electronic energy: -4167.75978235 a.u. / lowest freq: 13.88 cm-1

|    |           |           |           |
|----|-----------|-----------|-----------|
| H  | 6.396640  | -1.868249 | 0.915764  |
| H  | 7.547323  | -3.495233 | -1.004734 |
| H  | 6.587205  | -1.287813 | -0.762850 |
| C  | 6.113382  | -2.066787 | -0.132258 |
| H  | 6.472419  | -4.184142 | 0.241099  |
| C  | 6.518922  | -3.466426 | -0.605223 |
| O  | 4.721943  | -2.057289 | -0.287417 |
| Na | 2.777355  | -2.252702 | 0.912131  |
| O  | 5.586348  | -3.777277 | -1.595027 |
| B  | 4.341497  | -3.076209 | -1.317931 |
| O  | 3.246728  | -3.881409 | -0.707362 |
| O  | 3.746830  | -2.538728 | -2.538836 |
| H  | 2.487919  | -5.047511 | -2.249066 |
| C  | 2.274928  | -4.114089 | -1.690136 |
| C  | 2.397554  | -2.892197 | -2.605526 |
| H  | 2.089955  | -3.104054 | -3.644531 |
| H  | 1.746932  | -2.074901 | -2.226029 |
| H  | 1.276082  | -4.202608 | -1.233530 |
| C  | 1.454766  | 3.808032  | -2.299716 |
| H  | 2.264705  | 3.451357  | -2.952812 |
| C  | 0.057610  | 3.608127  | -2.919652 |
| H  | -0.498587 | 4.551161  | -3.020310 |
| C  | 0.208915  | 2.373480  | -0.941095 |
| C  | -1.897853 | 2.159905  | -2.102715 |
| C  | -2.034718 | 0.889368  | -2.678810 |
| C  | -3.005713 | 2.878353  | -1.625604 |
| C  | -4.446439 | 1.034291  | -2.321795 |
| Cu | -0.183281 | 1.060946  | 0.399694  |
| N  | 1.383395  | 2.985707  | -1.085191 |
| N  | -0.592051 | 2.716980  | -1.949018 |
| C  | -1.840382 | -0.140893 | 2.345189  |
| C  | -0.472959 | -0.479144 | 1.667700  |
| H  | 0.096339  | 3.130750  | -3.910008 |
| H  | 1.656456  | 4.859131  | -2.047995 |
| H  | -1.802741 | -0.562920 | 3.364515  |
| C  | -0.383737 | -1.571569 | 0.680395  |
| C  | 0.715286  | -0.327976 | 2.517199  |
| O  | -1.407162 | -1.584189 | -0.190365 |
| O  | 0.514089  | -2.392128 | 0.564678  |
| O  | 1.851090  | -0.724784 | 2.290456  |
| O  | 0.470190  | 0.379810  | 3.633454  |
| C  | 1.593064  | 0.747878  | 4.418148  |
| H  | 2.102928  | -0.138262 | 4.820579  |
| H  | 1.202203  | 1.358771  | 5.239265  |
| H  | 2.309665  | 1.331575  | 3.821025  |
| C  | -1.475890 | -2.664704 | -1.102771 |
| H  | -0.596160 | -2.682542 | -1.761479 |
| H  | -2.383867 | -2.500819 | -1.693651 |
| H  | -1.545012 | -3.625234 | -0.572493 |
| C  | -3.041123 | -0.725429 | 1.656926  |
| H  | -3.302357 | -0.267897 | 0.698456  |
| C  | -3.781429 | -1.723932 | 2.147970  |
| H  | -3.519496 | -2.147497 | 3.124731  |
| C  | -4.942661 | -2.338005 | 1.477110  |
| C  | -5.789389 | -3.188448 | 2.204246  |
| C  | -5.232091 | -2.119659 | 0.118770  |
| C  | -6.895519 | -3.789440 | 1.605202  |
| H  | -5.577021 | -3.377374 | 3.259988  |
| C  | -6.336338 | -2.719588 | -0.480330 |
| H  | -4.578870 | -1.480889 | -0.481036 |
| C  | -7.174933 | -3.556215 | 0.259408  |
| H  | -7.541530 | -4.444343 | 2.194356  |
| H  | -6.541495 | -2.538484 | -1.537852 |
| H  | -8.038842 | -4.027502 | -0.214221 |
| C  | -2.022094 | 1.368097  | 2.504979  |
| H  | -1.164879 | 1.924362  | 2.899354  |
| C  | -3.138697 | 2.013296  | 2.264166  |

|   |           |           |           |
|---|-----------|-----------|-----------|
| C | -4.262325 | 2.644815  | 2.038997  |
| H | -4.491876 | 3.061834  | 1.054320  |
| H | -5.010781 | 2.764884  | 2.829064  |
| C | -3.319788 | 0.346032  | -2.776523 |
| H | -3.442886 | -0.641939 | -3.229374 |
| C | -4.268698 | 2.299783  | -1.750173 |
| H | -5.143483 | 2.848964  | -1.389837 |
| C | -0.828714 | 0.117547  | -3.141499 |
| H | -0.180177 | 0.718648  | -3.795514 |
| H | -0.215919 | -0.191636 | -2.280377 |
| H | -1.123308 | -0.787528 | -3.688017 |
| C | -2.815625 | 4.211914  | -0.954642 |
| H | -2.275058 | 4.088402  | -0.002332 |
| H | -2.227267 | 4.903911  | -1.574462 |
| H | -3.781088 | 4.688972  | -0.740094 |
| C | 2.491400  | 2.703962  | -0.228372 |
| C | 2.853935  | 3.625909  | 0.762721  |
| C | 3.150389  | 1.469671  | -0.365852 |
| C | 3.901964  | 3.286361  | 1.625263  |
| C | 4.187101  | 1.173437  | 0.517590  |
| C | 4.575079  | 2.066650  | 1.520877  |
| H | 4.188065  | 3.992778  | 2.409814  |
| H | 4.680967  | 0.203831  | 0.420519  |
| C | -5.825899 | 0.442940  | -2.442599 |
| H | -6.484698 | 1.098350  | -3.032367 |
| H | -5.799972 | -0.540396 | -2.932004 |
| H | -6.289992 | 0.318494  | -1.452087 |
| C | 2.712904  | 0.457255  | -1.387832 |
| H | 1.780763  | -0.028742 | -1.050998 |
| H | 2.490237  | 0.917027  | -2.361813 |
| H | 3.461838  | -0.333444 | -1.525914 |
| C | 2.119033  | 4.931484  | 0.909307  |
| H | 2.421248  | 5.651936  | 0.132329  |
| H | 1.032373  | 4.787506  | 0.815887  |
| H | 2.325111  | 5.393098  | 1.883985  |
| C | 5.686187  | 1.698818  | 2.468814  |
| H | 5.465102  | 0.748363  | 2.978422  |
| H | 6.636150  | 1.562167  | 1.929334  |
| H | 5.839228  | 2.470741  | 3.235760  |

106

Figure\_S10-1\_PA-SIMes(Naborate)-ed(1,4) / electronic energy: -4167.72594722 a.u. / lowest freq: -12.73 cm-1

|    |            |           |           |
|----|------------|-----------|-----------|
| H  | -0.748540  | -1.415425 | 3.403760  |
| H  | -0.221270  | -1.364166 | 5.110248  |
| C  | 0.127467   | -1.283929 | 4.062046  |
| H  | 1.118179   | -3.235967 | 4.334915  |
| C  | 1.243489   | -2.292200 | 3.776960  |
| O  | 0.741111   | -0.042830 | 3.828331  |
| H  | 1.256334   | -2.538821 | 2.694472  |
| O  | 2.409713   | -1.627654 | 4.160802  |
| Na | 0.942673   | 0.455368  | 1.584604  |
| B  | 2.207485   | -0.190692 | 4.030600  |
| O  | 2.799677   | 0.531326  | 5.143173  |
| O  | 2.850661   | 0.439284  | 2.816637  |
| C  | 3.647067   | 1.534618  | 4.672005  |
| H  | 4.535918   | 1.644172  | 5.317171  |
| C  | 4.008314   | 1.091203  | 3.252262  |
| H  | 4.872723   | 0.396771  | 3.262284  |
| H  | 4.264857   | 1.938535  | 2.593254  |
| H  | 3.135167   | 2.519297  | 4.640537  |
| H  | 5.397836   | 0.342660  | -1.107460 |
| H  | 4.584030   | 2.590437  | -1.343638 |
| C  | 4.540336   | 0.565787  | -0.458237 |
| C  | 4.107830   | 2.037942  | -0.517676 |
| H  | 4.783539   | 0.250729  | 0.566481  |
| N  | 3.337885   | -0.134490 | -0.934284 |
| N  | 2.662895   | 1.928162  | -0.760403 |
| H  | 4.312859   | 2.580459  | 0.415223  |
| H  | 4.851095   | -2.020454 | 1.272093  |
| H  | 2.184537   | 4.221900  | 2.088853  |
| C  | 3.765476   | -2.170500 | 1.145867  |
| C  | 1.670776   | 3.388293  | 1.587124  |
| H  | 3.275011   | -1.259303 | 1.509977  |
| H  | 2.329231   | 2.515133  | 1.654173  |
| H  | 3.476159   | -2.988535 | 1.817729  |
| H  | -0.604056  | -3.292106 | -4.450203 |
| H  | -5.876938  | -2.468078 | 0.518588  |
| C  | -5.935689  | -1.376424 | 0.440713  |
| C  | -7.291979  | -0.821351 | 0.467717  |
| C  | -7.557695  | 0.551196  | 0.315002  |
| H  | -8.185385  | -2.765838 | 0.772756  |
| C  | -8.375119  | -1.696132 | 0.653510  |
| C  | -8.863409  | 1.027661  | 0.351267  |
| H  | -9.052683  | 2.095978  | 0.228457  |
| C  | -9.682909  | -1.218186 | 0.691769  |
| C  | -9.930330  | 0.145438  | 0.540540  |
| H  | -10.511130 | -1.914355 | 0.838917  |
| H  | -10.954244 | 0.524236  | 0.569022  |
| H  | 3.300880   | -1.312771 | -4.686293 |
| H  | 3.674609   | -0.003551 | -3.534815 |

|    |           |           |           |
|----|-----------|-----------|-----------|
| C  | 3.015551  | -0.861519 | -3.726600 |
| H  | 1.990740  | -0.470962 | -3.832939 |
| H  | 2.755663  | -3.514280 | -3.977609 |
| C  | 3.087865  | -1.883376 | -2.622825 |
| C  | 2.940237  | -3.235699 | -2.936306 |
| H  | -1.897402 | 0.142280  | -2.963452 |
| C  | 3.295404  | -1.524494 | -1.276168 |
| C  | 2.286461  | 0.680068  | -1.079526 |
| C  | 3.026228  | -4.234179 | -1.964360 |
| C  | -1.012516 | -0.466596 | -2.721770 |
| Cu | 0.558542  | 0.137753  | -1.768426 |
| C  | 3.444273  | -2.506784 | -0.282260 |
| C  | 3.304518  | -3.847953 | -0.653073 |
| H  | 0.459575  | -3.569495 | -0.805710 |
| H  | 3.399259  | -4.613845 | 0.122044  |
| C  | -0.262083 | -3.913010 | -0.051364 |
| O  | 0.055664  | -1.403784 | 0.592734  |
| H  | -0.686368 | -4.879914 | -0.339703 |
| C  | -1.077578 | -1.756962 | 0.326515  |
| H  | 0.239474  | -3.990415 | 0.923116  |
| O  | -1.363362 | -3.009742 | 0.020414  |
| C  | -2.262560 | -0.857457 | 0.293553  |
| H  | 1.929729  | 3.378710  | -4.360909 |
| H  | 3.118085  | 2.535050  | -3.336878 |
| C  | 2.050244  | 2.767627  | -3.457078 |
| H  | 1.528278  | 1.811885  | -3.621434 |
| H  | 0.354902  | 4.862872  | -3.430957 |
| C  | 1.491934  | 3.475844  | -2.252258 |
| C  | 0.617508  | 4.549627  | -2.416541 |
| C  | 1.815500  | 3.067741  | -0.942521 |
| C  | 0.075287  | 5.237202  | -1.325312 |
| C  | -1.038691 | -1.709676 | -3.118441 |
| C  | 1.317856  | 3.758884  | 0.171641  |
| C  | 0.451141  | 4.835720  | -0.044932 |
| C  | -1.015720 | -2.981222 | -3.484234 |
| H  | -1.415814 | -3.762562 | -2.829694 |
| H  | 0.051294  | 5.366017  | 0.824184  |
| H  | -1.462009 | 2.740684  | -1.226420 |
| H  | 0.761214  | 3.179763  | 2.170640  |
| H  | -3.222407 | 3.009601  | -1.505640 |
| C  | -2.471258 | 2.642631  | -0.799450 |
| O  | -2.776663 | 1.265870  | -0.584110 |
| C  | -1.968437 | 0.602274  | 0.223271  |
| C  | -3.512329 | -1.384601 | 0.327755  |
| H  | -3.569091 | -2.475164 | 0.389669  |
| O  | -1.070410 | 1.153006  | 0.828677  |
| H  | -2.518912 | 3.204961  | 0.142707  |
| C  | -4.777577 | -0.689014 | 0.338299  |
| H  | -4.773406 | 0.398520  | 0.259295  |
| H  | -6.738571 | 1.256535  | 0.162329  |
| C  | -0.913274 | 6.353800  | -1.532506 |
| C  | 2.798070  | -5.678096 | -2.324478 |
| H  | 3.167780  | -6.355135 | -1.542016 |
| H  | 3.294130  | -5.938344 | -3.270940 |
| H  | 1.721785  | -5.874245 | -2.457529 |
| H  | -0.909704 | 7.059190  | -0.689981 |
| H  | -1.934875 | 5.949936  | -1.622554 |
| H  | -0.701256 | 6.912314  | -2.455251 |

106

Figure\_S10-1\_PA-SIMes(Naborate)-ts(1,4) / electronic energy: -4167.70362749 a.u. / lowest freq: -447.01 cm-1

|    |           |           |           |
|----|-----------|-----------|-----------|
| H  | -0.305055 | -3.103406 | 2.122030  |
| H  | 0.147868  | -3.833233 | 3.688376  |
| C  | 0.494787  | -3.158934 | 2.880176  |
| H  | 1.916605  | -4.746328 | 2.308253  |
| C  | 1.825078  | -3.646233 | 2.299517  |
| O  | 0.800796  | -1.886899 | 3.379936  |
| H  | 1.921060  | -3.310171 | 1.245483  |
| O  | 2.797038  | -3.052091 | 3.107498  |
| Na | 0.937158  | -0.091943 | 1.925858  |
| B  | 2.250658  | -1.846175 | 3.726259  |
| O  | 2.579462  | -1.787726 | 5.142597  |
| O  | 2.760230  | -0.541969 | 3.185023  |
| C  | 3.010399  | -0.502125 | 5.471212  |
| H  | 3.766823  | -0.527540 | 6.274626  |
| C  | 3.567693  | 0.054745  | 4.158824  |
| H  | 4.629475  | -0.236934 | 4.028571  |
| H  | 3.513068  | 1.154975  | 4.101276  |
| H  | 2.170812  | 0.132751  | 5.827042  |
| H  | 5.150670  | 1.357224  | -2.304530 |
| H  | 4.312009  | 3.439572  | -1.492195 |
| C  | 4.625163  | 1.258460  | -1.343146 |
| C  | 4.091846  | 2.599221  | -0.816718 |
| H  | 5.302845  | 0.764245  | -0.632827 |
| N  | 3.394461  | 0.477121  | -1.515495 |
| N  | 2.643684  | 2.362107  | -0.759089 |
| H  | 4.485101  | 2.852648  | 0.178699  |
| H  | 5.230038  | -1.315834 | 0.472254  |
| H  | 3.203654  | 3.411170  | 2.457854  |
| C  | 4.146894  | -1.518189 | 0.424543  |

|    |            |           |           |
|----|------------|-----------|-----------|
| C  | 2.343623   | 2.826538  | 2.093633  |
| H  | 3.629851   | -0.622754 | 0.792051  |
| H  | 2.743570   | 1.880009  | 1.705414  |
| H  | 3.930816   | -2.318403 | 1.143976  |
| H  | -3.746273  | -1.170258 | -3.151059 |
| H  | -5.533958  | -2.411471 | -0.912876 |
| C  | -5.683061  | -1.452011 | -0.403480 |
| C  | -7.065156  | -1.176783 | 0.016672  |
| C  | -7.444806  | 0.011387  | 0.666052  |
| H  | -7.780938  | -3.068624 | -0.741409 |
| C  | -8.056463  | -2.137902 | -0.238600 |
| C  | -8.766483  | 0.226157  | 1.042417  |
| H  | -9.040016  | 1.156144  | 1.545640  |
| C  | -9.380955  | -1.923365 | 0.138006  |
| C  | -9.741238  | -0.739768 | 0.780539  |
| H  | -10.134883 | -2.685259 | -0.071495 |
| H  | -10.778395 | -0.567831 | 1.076151  |
| H  | 2.621904   | -0.563090 | -5.246414 |
| H  | 3.542275   | 0.617354  | -4.276765 |
| C  | 2.746716   | -0.141968 | -4.240263 |
| H  | 1.817852   | 0.380960  | -3.969314 |
| H  | 2.767641   | -2.836632 | -4.624738 |
| C  | 3.064387   | -1.220324 | -3.239145 |
| C  | 3.033417   | -2.569558 | -3.597896 |
| H  | -0.448164  | 1.008468  | -3.843279 |
| C  | 3.400030   | -0.893221 | -1.915438 |
| C  | 2.282950   | 1.145723  | -1.186336 |
| C  | 3.336960   | -3.581924 | -2.681438 |
| C  | -0.905809  | 0.545993  | -2.960059 |
| Cu | 0.464094   | 0.451167  | -1.489131 |
| C  | 3.737326   | -1.879281 | -0.975404 |
| C  | 3.694703   | -3.216131 | -1.381858 |
| H  | 0.675213   | -2.758315 | -1.970667 |
| H  | 3.941140   | -3.992780 | -0.652200 |
| C  | 0.011533   | -3.367410 | -1.338990 |
| O  | 0.264982   | -1.204064 | 0.075898  |
| H  | -0.378245  | -4.217571 | -1.908542 |
| C  | -0.892348  | -1.483258 | -0.268150 |
| H  | 0.581911   | -3.722368 | -0.470184 |
| O  | -1.124254  | -2.616064 | -0.932450 |
| C  | -2.068658  | -0.666740 | -0.042107 |
| H  | 0.720938   | 4.626549  | -3.349103 |
| H  | 2.282010   | 3.831135  | -3.016643 |
| C  | 1.216096   | 3.855356  | -2.744795 |
| H  | 0.792074   | 2.877964  | -3.018861 |
| H  | -0.415047  | 5.682569  | -1.562735 |
| C  | 1.026444   | 4.116136  | -1.274938 |
| C  | 0.142999   | 5.096727  | -0.826734 |
| C  | 1.731625   | 3.364597  | -0.316438 |
| C  | -0.045194  | 5.352948  | 0.537268  |
| C  | -2.123064  | 0.175454  | -2.940293 |
| C  | 1.573553   | 3.599461  | 1.055814  |
| C  | 0.679301   | 4.597922  | 1.458251  |
| C  | -3.391914  | -0.241756 | -2.694000 |
| H  | -4.152436  | 0.523023  | -2.512549 |
| H  | 0.540985   | 4.779508  | 2.527794  |
| H  | -1.770804  | 3.305192  | 0.377988  |
| H  | 1.712526   | 2.609255  | 2.967847  |
| H  | -3.567308  | 3.392668  | 0.428388  |
| C  | -2.685862  | 2.838426  | 0.768834  |
| O  | -2.829292  | 1.522247  | 0.256947  |
| C  | -1.875749  | 0.641383  | 0.576413  |
| C  | -3.276592  | -1.063473 | -0.655535 |
| H  | -3.241290  | -2.075859 | -1.058436 |
| O  | -0.948258  | 0.974186  | 1.303371  |
| H  | -2.641486  | 2.834240  | 1.866876  |
| C  | -4.614644  | -0.655326 | -0.220725 |
| H  | -4.711457  | 0.310709  | 0.274057  |
| H  | -6.699976  | 0.779943  | 0.881556  |
| C  | -1.029929  | 6.399227  | 0.988276  |
| C  | 3.242216   | -5.032290 | -3.076433 |
| H  | 3.923146   | -5.657010 | -2.481615 |
| H  | 3.476296   | -5.177350 | -4.140599 |
| H  | 2.220557   | -5.411904 | -2.911611 |
| H  | -0.941610  | 6.597811  | 2.064994  |
| H  | -2.063546  | 6.073750  | 0.789394  |
| H  | -0.880121  | 7.346575  | 0.449472  |

106

Figure\_S10-1\_PA-SIMes(Naborate)-prod(1,4) / electronic energy: -4167.77405497 a.u. / lowest freq: 15.51 cm<sup>-1</sup>

|    |           |           |          |
|----|-----------|-----------|----------|
| H  | 0.194828  | -3.917143 | 1.927800 |
| H  | 1.325519  | -4.388355 | 3.229844 |
| C  | 1.073225  | -3.587088 | 2.507921 |
| H  | 2.919356  | -4.124265 | 1.427722 |
| C  | 2.269677  | -3.252575 | 1.612336 |
| O  | 0.804590  | -2.382978 | 3.180505 |
| H  | 1.920596  | -2.875110 | 0.632386 |
| O  | 2.958198  | -2.260200 | 2.321580 |
| Na | -0.773499 | -0.915696 | 2.453272 |
| B  | 2.010478  | -1.522080 | 3.114848 |

|    |            |           |           |
|----|------------|-----------|-----------|
| O  | 2.560109   | -1.086387 | 4.381209  |
| O  | 1.537352   | -0.201231 | 2.483400  |
| C  | 2.246611   | 0.252390  | 4.618354  |
| H  | 3.036619   | 0.748257  | 5.206929  |
| C  | 2.096441   | 0.857268  | 3.225076  |
| H  | 3.085185   | 1.135658  | 2.813155  |
| H  | 1.446026   | 1.746086  | 3.191466  |
| H  | 1.295899   | 0.356789  | 5.182987  |
| H  | 3.936077   | 1.038280  | -3.488244 |
| H  | 2.942411   | 3.147936  | -2.985937 |
| C  | 4.032234   | 1.311881  | -2.426929 |
| C  | 3.421531   | 2.683406  | -2.110146 |
| H  | 5.098101   | 1.247310  | -2.158761 |
| N  | 3.235875   | 0.413926  | -1.584922 |
| N  | 2.417971   | 2.353633  | -1.091669 |
| H  | 4.158672   | 3.396379  | -1.712051 |
| H  | 5.446112   | 0.340768  | 0.000330  |
| H  | 4.125445   | 4.283099  | 0.595243  |
| C  | 4.990220   | -0.554820 | 0.448359  |
| C  | 3.307827   | 3.849422  | 1.193603  |
| H  | 4.184397   | -0.228505 | 1.123378  |
| H  | 3.505783   | 2.771993  | 1.281312  |
| H  | 5.746946   | -1.069094 | 1.054297  |
| H  | -4.139904  | 0.641821  | -3.374033 |
| H  | -5.080127  | -2.279895 | -1.283099 |
| C  | -5.365516  | -1.325793 | -0.823114 |
| C  | -6.653588  | -1.343730 | -0.102055 |
| C  | -7.220771  | -0.199564 | 0.485584  |
| H  | -6.932535  | -3.457028 | -0.442609 |
| C  | -7.354158  | -2.555067 | 0.009284  |
| C  | -8.436099  | -0.269478 | 1.160175  |
| H  | -8.858041  | 0.633640  | 1.607255  |
| C  | -8.571227  | -2.627567 | 0.685579  |
| C  | -9.118148  | -1.484008 | 1.265300  |
| H  | -9.094002  | -3.583902 | 0.759454  |
| H  | -10.072313 | -1.536050 | 1.794126  |
| H  | 1.384386   | -2.080470 | -4.011706 |
| H  | 2.207293   | -0.502762 | -4.029131 |
| C  | 1.799097   | -1.288040 | -3.374306 |
| H  | 0.967545   | -0.832152 | -2.813183 |
| H  | 2.643129   | -3.872535 | -3.096616 |
| C  | 2.840199   | -1.834495 | -2.435299 |
| C  | 3.147062   | -3.197674 | -2.398517 |
| H  | -0.451288  | -0.037313 | -5.307424 |
| C  | 3.493760   | -0.986217 | -1.531971 |
| C  | 2.329933   | 1.042409  | -0.823386 |
| C  | 4.070971   | -3.717219 | -1.487757 |
| C  | -1.230573  | 0.171874  | -4.597558 |
| Cu | 1.223505   | 0.148802  | 0.457884  |
| C  | 4.406549   | -1.475773 | -0.585656 |
| C  | 4.687192   | -2.841843 | -0.589183 |
| H  | 0.615175   | -3.173911 | -1.474180 |
| H  | 5.388935   | -3.237473 | 0.150184  |
| C  | -0.440293  | -3.461434 | -1.375787 |
| O  | -0.155139  | -1.429529 | 0.191103  |
| H  | -0.720569  | -4.141259 | -2.188677 |
| C  | -1.104190  | -1.328619 | -0.621636 |
| H  | -0.573454  | -3.967600 | -0.407895 |
| O  | -1.297699  | -2.341570 | -1.488446 |
| C  | -2.028550  | -0.258738 | -0.721461 |
| H  | -1.060615  | 3.074623  | -2.760657 |
| H  | 0.629978   | 2.643373  | -3.108157 |
| C  | -0.129172  | 2.703640  | -2.314027 |
| H  | -0.304307  | 1.672355  | -1.968732 |
| H  | -1.463488  | 4.776764  | -1.154011 |
| C  | 0.314644   | 3.573666  | -1.173231 |
| C  | -0.496277  | 4.592742  | -0.677579 |
| C  | 1.554594   | 3.349506  | -0.553368 |
| C  | -0.115070  | 5.366428  | 0.424769  |
| C  | -2.105923  | 0.412266  | -3.796583 |
| C  | 1.971302   | 4.103814  | 0.550505  |
| C  | 1.115826   | 5.102783  | 1.028740  |
| C  | -3.177499  | 0.671992  | -2.836693 |
| H  | -3.071336  | 1.687226  | -2.424992 |
| H  | 1.425285   | 5.692309  | 1.896661  |
| H  | -1.842276  | 3.288165  | 1.171192  |
| H  | 3.357495   | 4.297362  | 2.195029  |
| H  | -3.512115  | 3.609962  | 0.592799  |
| C  | -2.826157  | 2.844261  | 0.974395  |
| O  | -2.751503  | 1.846442  | -0.026546 |
| C  | -1.866460  | 0.841227  | 0.171204  |
| C  | -3.210031  | -0.356254 | -1.677541 |
| H  | -3.152456  | -1.348971 | -2.140371 |
| O  | -1.034801  | 0.954103  | 1.088753  |
| H  | -3.227967  | 2.426710  | 1.911022  |
| C  | -4.530144  | -0.286622 | -0.949916 |
| H  | -4.774400  | 0.678760  | -0.496868 |
| H  | -6.709129  | 0.762375  | 0.411517  |
| C  | -1.038007  | 6.429676  | 0.959728  |

|   |           |           |           |
|---|-----------|-----------|-----------|
| C | 4.358258  | -5.194616 | -1.431167 |
| H | 5.430287  | -5.388712 | -1.281471 |
| H | 4.038534  | -5.705405 | -2.350089 |
| H | 3.823631  | -5.659741 | -0.586774 |
| H | -1.936621 | 5.975081  | 1.406811  |
| H | -1.379966 | 7.101335  | 0.158194  |
| H | -0.549845 | 7.038400  | 1.733104  |

32

Figure\_S10-1\_dienoate / electronic energy: -841.927078481 a.u. / lowest freq: 24.55 cm-1

|   |           |           |           |
|---|-----------|-----------|-----------|
| C | -0.660544 | -0.726572 | 0.059153  |
| C | -1.860539 | -0.097447 | 0.115996  |
| H | -0.691600 | -1.818492 | -0.004770 |
| C | -1.976243 | 1.390665  | 0.160143  |
| C | -3.120576 | -0.891785 | 0.187355  |
| O | -3.041424 | 1.823605  | -0.507466 |
| O | -1.182749 | 2.134043  | 0.689285  |
| O | -4.147702 | -0.497504 | 0.683440  |
| O | -2.981802 | -2.118850 | -0.320932 |
| C | -4.097604 | -2.989729 | -0.195724 |
| H | -4.332384 | -3.170881 | 0.862818  |
| H | -3.810049 | -3.927003 | -0.683244 |
| H | -4.981752 | -2.562067 | -0.688186 |
| C | -3.254671 | 3.228152  | -0.535442 |
| H | -3.354009 | 3.627502  | 0.483524  |
| H | -4.184056 | 3.384216  | -1.092621 |
| H | -2.420438 | 3.737793  | -1.038016 |
| C | 0.656646  | -0.129211 | 0.062308  |
| H | 0.725624  | 0.955889  | 0.150505  |
| C | 1.759981  | -0.902956 | -0.019704 |
| H | 1.621029  | -1.988149 | -0.089650 |
| C | 3.156351  | -0.453635 | -0.025165 |
| C | 4.175093  | -1.416830 | -0.109525 |
| C | 3.522207  | 0.902114  | 0.053056  |
| C | 5.517020  | -1.042840 | -0.114390 |
| H | 3.907556  | -2.474776 | -0.172060 |
| C | 4.861836  | 1.275255  | 0.048166  |
| H | 2.754752  | 1.675486  | 0.118691  |
| C | 5.863995  | 0.305241  | -0.035401 |
| H | 6.294080  | -1.807149 | -0.179427 |
| H | 5.127957  | 2.332459  | 0.111300  |
| H | 6.914980  | 0.602284  | -0.038425 |

50

Figure\_S10-1\_dienoate-Naborate / electronic energy: -1486.89608401 a.u. / lowest freq: 15.45 cm-1

|    |           |           |           |
|----|-----------|-----------|-----------|
| H  | -4.420128 | 2.087873  | 2.299924  |
| H  | -5.923773 | -2.547792 | 1.430468  |
| C  | -3.899637 | 1.709040  | 1.397197  |
| O  | -6.388627 | -0.555754 | 1.056848  |
| H  | -2.832933 | 1.979558  | 1.487735  |
| O  | -4.052556 | 0.323170  | 1.268895  |
| C  | -6.462160 | -1.902837 | 0.702697  |
| H  | -7.509160 | -2.251286 | 0.668862  |
| Na | -2.589162 | -0.954460 | 0.028443  |
| B  | -5.242902 | 0.056168  | 0.401101  |
| C  | -4.549382 | 2.260434  | 0.125108  |
| H  | -4.940007 | 3.284567  | 0.257486  |
| O  | -5.580090 | 1.360046  | -0.149654 |
| C  | -5.777159 | -1.970930 | -0.665207 |
| O  | -4.794555 | -0.975836 | -0.589590 |
| H  | -3.802053 | 2.287356  | -0.695287 |
| H  | -6.503487 | -1.753783 | -1.474182 |
| H  | -5.329092 | -2.957849 | -0.872632 |
| C  | 2.217972  | 0.782767  | -0.357663 |
| C  | 0.968244  | 0.253780  | -0.477916 |
| H  | 2.268783  | 1.873090  | -0.426363 |
| C  | 0.656300  | -1.199329 | -0.386928 |
| C  | -0.192151 | 1.162783  | -0.688524 |
| O  | 1.634875  | -1.973268 | -0.831358 |
| O  | -0.381350 | -1.656994 | 0.046156  |
| O  | -1.335622 | 0.796830  | -0.869352 |
| O  | 0.144585  | 2.445194  | -0.682767 |
| C  | -0.892656 | 3.394615  | -0.904656 |
| H  | -1.373335 | 3.224078  | -1.877338 |
| H  | -0.410674 | 4.376881  | -0.885452 |
| H  | -1.650282 | 3.328425  | -0.112354 |
| C  | 1.442759  | -3.383139 | -0.742768 |
| H  | 1.291967  | -3.686873 | 0.301829  |
| H  | 2.354400  | -3.836025 | -1.144545 |
| H  | 0.572193  | -3.688467 | -1.338576 |
| C  | 3.478653  | 0.126613  | -0.118869 |
| H  | 3.499709  | -0.957579 | -0.015571 |
| C  | 4.611174  | 0.860860  | -0.028545 |
| H  | 4.527241  | 1.946558  | -0.152174 |
| C  | 5.966988  | 0.366461  | 0.217775  |
| C  | 7.021202  | 1.293347  | 0.272402  |
| C  | 6.260030  | -0.996390 | 0.405467  |
| C  | 8.328905  | 0.875902  | 0.507087  |
| H  | 6.809143  | 2.355652  | 0.127725  |
| C  | 7.565616  | -1.412370 | 0.640052  |
| H  | 5.462269  | -1.740462 | 0.369434  |

|   |          |           |          |
|---|----------|-----------|----------|
| C | 8.603756 | -0.478381 | 0.691959 |
| H | 9.135264 | 1.610831  | 0.545810 |
| H | 7.777281 | -2.473596 | 0.785169 |
| H | 9.627956 | -0.809398 | 0.876235 |

41

Figure\_S10-1\_PPh3-Cu-allenyl / electronic energy: -2791.78064609 a.u. / lowest freq: -8.52 cm-1

|    |           |           |           |
|----|-----------|-----------|-----------|
| Cu | 1.925957  | 0.441034  | -0.969324 |
| C  | 3.695423  | 0.782212  | -1.650311 |
| H  | 3.901621  | 1.250294  | -2.626132 |
| C  | 4.739409  | 0.464057  | -0.934464 |
| C  | 5.764894  | 0.124180  | -0.171645 |
| H  | 6.228054  | -0.865398 | -0.246897 |
| H  | 6.190086  | 0.825011  | 0.554818  |
| P  | -0.093017 | 0.040978  | -0.106258 |
| C  | -0.713342 | 1.391986  | 0.957863  |
| C  | -1.380331 | 1.168166  | 2.166791  |
| C  | -0.511650 | 2.705927  | 0.513218  |
| C  | -1.849259 | 2.247854  | 2.915852  |
| H  | -1.535294 | 0.149778  | 2.529631  |
| C  | -0.989950 | 3.780817  | 1.258089  |
| H  | 0.022539  | 2.889678  | -0.423318 |
| C  | -1.658731 | 3.552160  | 2.461671  |
| H  | -2.365753 | 2.066564  | 3.860640  |
| H  | -0.832329 | 4.800736  | 0.901689  |
| H  | -2.027713 | 4.394962  | 3.049984  |
| C  | -0.164393 | -1.456811 | 0.937848  |
| C  | -1.315396 | -2.246691 | 1.042854  |
| C  | 0.979917  | -1.802657 | 1.668371  |
| C  | -1.322993 | -3.362695 | 1.878346  |
| H  | -2.210179 | -1.992779 | 0.469631  |
| C  | 0.967011  | -2.915256 | 2.507351  |
| H  | 1.889455  | -1.202122 | 1.577400  |
| C  | -0.184532 | -3.695898 | 2.612619  |
| H  | -2.223689 | -3.975283 | 1.954422  |
| H  | 1.863220  | -3.177711 | 3.073131  |
| H  | -0.192646 | -4.571265 | 3.265682  |
| C  | -1.410845 | -0.201190 | -1.350523 |
| C  | -2.710237 | 0.290159  | -1.183020 |
| C  | -1.089521 | -0.925749 | -2.506174 |
| C  | -3.679067 | 0.050420  | -2.157376 |
| H  | -2.969562 | 0.864064  | -0.290291 |
| C  | -2.061407 | -1.169847 | -3.473746 |
| H  | -0.072030 | -1.299724 | -2.651497 |
| C  | -3.357069 | -0.680980 | -3.300219 |
| H  | -4.690190 | 0.439664  | -2.021497 |
| H  | -1.803574 | -1.735870 | -4.371205 |
| H  | -4.117079 | -0.866243 | -4.062285 |

91

Figure\_S10-1\_PA-PPh3(Naborate)-ed(1,6) / electronic energy: -4278.71914908 a.u. / lowest freq: 17.78 cm-1

|    |           |           |           |
|----|-----------|-----------|-----------|
| Na | -2.695931 | -2.493458 | -0.662928 |
| B  | -5.288381 | -1.991207 | 0.509827  |
| O  | -4.990905 | -2.090748 | -0.960071 |
| O  | -5.841208 | -0.728046 | 0.969819  |
| O  | -3.965261 | -2.081441 | 1.183658  |
| C  | -4.897909 | -0.034640 | 1.728669  |
| C  | -3.889810 | -1.102699 | 2.180923  |
| O  | -6.213687 | -3.091901 | 0.749593  |
| C  | -5.910665 | -2.977469 | -1.536731 |
| C  | -6.273790 | -3.909516 | -0.378164 |
| H  | -5.371252 | 0.474581  | 2.586939  |
| H  | -4.393781 | 0.750003  | 1.128417  |
| H  | -4.174660 | -1.518644 | 3.168078  |
| H  | -2.861523 | -0.711751 | 2.269671  |
| H  | -5.465363 | -3.506759 | -2.396177 |
| H  | -6.809122 | -2.439405 | -1.899327 |
| H  | -5.541690 | -4.744334 | -0.319028 |
| H  | -7.274571 | -4.360718 | -0.494187 |
| Cu | 1.677452  | 0.602805  | -0.644752 |
| C  | 2.363867  | -1.288113 | -1.110241 |
| C  | 0.971964  | -1.375942 | -0.825600 |
| H  | 2.605470  | -1.177053 | -2.170383 |
| C  | 0.373438  | -1.879181 | 0.435358  |
| C  | 0.052760  | -1.309436 | -2.000609 |
| O  | 1.253003  | -2.074599 | 1.412979  |
| O  | -0.810842 | -2.087096 | 0.602657  |
| O  | -1.002577 | -1.894021 | -2.123576 |
| O  | 0.531948  | -0.517478 | -2.955827 |
| C  | -0.233605 | -0.395604 | -4.151123 |
| H  | -0.334371 | -1.372445 | -4.642980 |
| H  | 0.321520  | 0.296950  | -4.791230 |
| H  | -1.229250 | 0.008401  | -3.926082 |
| C  | 0.757765  | -2.630909 | 2.628492  |
| H  | -0.080002 | -2.037468 | 3.015672  |
| H  | 1.597882  | -2.614806 | 3.330227  |
| H  | 0.421217  | -3.663395 | 2.463197  |
| C  | 3.489022  | -1.656950 | -0.274869 |
| H  | 3.308913  | -1.847493 | 0.780569  |
| C  | 4.732392  | -1.746553 | -0.793864 |
| H  | 4.863209  | -1.553170 | -1.863608 |



|   |           |           |           |
|---|-----------|-----------|-----------|
| C | 5.954559  | -2.119115 | -0.071000 |
| C | 7.146204  | -2.281945 | -0.795555 |
| C | 5.988449  | -2.320667 | 1.319663  |
| C | 8.332812  | -2.635008 | -0.157271 |
| H | 7.138294  | -2.124892 | -1.877366 |
| C | 7.173029  | -2.672908 | 1.957825  |
| H | 5.081571  | -2.192852 | 1.913748  |
| C | 8.350472  | -2.831999 | 1.223097  |
| H | 9.248820  | -2.755249 | -0.739569 |
| H | 7.180378  | -2.822599 | 3.039677  |
| H | 9.279400  | -3.106078 | 1.727634  |
| C | 3.195735  | 1.715604  | -1.227739 |
| H | 2.906315  | 2.653273  | -1.728929 |
| C | 4.465315  | 1.515793  | -1.037468 |
| C | 5.741228  | 1.258160  | -0.810570 |
| H | 6.353615  | 0.722422  | -1.542556 |
| H | 6.233260  | 1.578206  | 0.113731  |
| P | -0.091633 | 1.911733  | 0.067007  |
| C | -1.481160 | 1.761602  | -1.108679 |
| C | -1.494788 | 2.519576  | -2.287359 |
| C | -2.484882 | 0.809193  | -0.896316 |
| C | -2.522768 | 2.354023  | -3.213554 |
| H | -0.708710 | 3.253340  | -2.481139 |
| C | -3.513393 | 0.641963  | -1.823586 |
| H | -2.472189 | 0.198007  | 0.009950  |
| C | -3.533979 | 1.420718  | -2.980667 |
| H | -2.530720 | 2.957172  | -4.123896 |
| H | -4.286717 | -0.108830 | -1.631709 |
| H | -4.339561 | 1.296341  | -3.707426 |
| C | 0.269907  | 3.703369  | 0.184314  |
| C | -0.717895 | 4.685891  | 0.031076  |
| C | 1.569329  | 4.084667  | 0.539443  |
| C | -0.405712 | 6.029334  | 0.224752  |
| H | -1.737553 | 4.407702  | -0.245073 |
| C | 1.876985  | 5.430478  | 0.737795  |
| H | 2.348051  | 3.326490  | 0.652253  |
| C | 0.891779  | 6.403367  | 0.578836  |
| H | -1.180936 | 6.788250  | 0.100546  |
| H | 2.894426  | 5.717183  | 1.011598  |
| H | 1.133070  | 7.457611  | 0.730515  |
| C | -0.804991 | 1.565200  | 1.715540  |
| C | -0.060787 | 0.801927  | 2.619630  |
| C | -2.020284 | 2.129019  | 2.127890  |
| C | -0.526124 | 0.600296  | 3.920147  |
| H | 0.891974  | 0.364005  | 2.310488  |
| C | -2.484418 | 1.923807  | 3.423390  |
| H | -2.613624 | 2.729158  | 1.434023  |
| C | -1.737430 | 1.158621  | 4.321484  |
| H | 0.063548  | 0.005410  | 4.620593  |
| H | -3.435436 | 2.360963  | 3.733485  |
| H | -2.103859 | 0.998145  | 5.337423  |

91

Figure\_S10-1\_PA-PPh3(Naborate)-ts(1,6) / electronic energy: -4278.70801041 a.u. / lowest freq: -446.52 cm<sup>-1</sup>

|    |           |           |           |
|----|-----------|-----------|-----------|
| Na | -2.723342 | -2.381323 | -0.647764 |
| B  | -5.309110 | -1.909486 | 0.577168  |
| O  | -5.040664 | -2.013536 | -0.896953 |
| O  | -5.846173 | -0.641325 | 1.045469  |
| O  | -3.974917 | -2.005534 | 1.225747  |
| C  | -4.889481 | 0.042513  | 1.796297  |
| C  | -3.879527 | -1.033044 | 2.226743  |
| O  | -6.236786 | -3.004029 | 0.837239  |
| C  | -5.964228 | -2.908342 | -1.453824 |
| C  | -6.310475 | -3.831272 | -0.282656 |
| H  | -5.348361 | 0.547504  | 2.664906  |
| H  | -4.390364 | 0.830301  | 1.195321  |
| H  | -4.150006 | -1.452596 | 3.216470  |
| H  | -2.848031 | -0.648124 | 2.300969  |
| H  | -5.527729 | -3.444185 | -2.313777 |
| H  | -6.868899 | -2.376588 | -1.810595 |
| H  | -5.576301 | -4.664324 | -0.226244 |
| H  | -7.312092 | -4.284721 | -0.381820 |
| Cu | 1.662642  | 0.592230  | -0.698960 |
| C  | 2.382593  | -1.360760 | -1.125643 |
| C  | 0.965609  | -1.456857 | -0.860145 |
| H  | 2.625384  | -1.288679 | -2.189927 |
| C  | 0.378237  | -1.954396 | 0.388651  |
| C  | 0.065926  | -1.380143 | -2.027574 |
| O  | 1.275333  | -2.176408 | 1.356182  |
| O  | -0.807387 | -2.153092 | 0.588878  |
| O  | -1.049446 | -1.856228 | -2.132208 |
| O  | 0.611349  | -0.686123 | -3.036446 |
| C  | -0.152056 | -0.561854 | -4.228529 |
| H  | -0.327693 | -1.547347 | -4.681892 |
| H  | 0.444902  | 0.061301  | -4.902588 |
| H  | -1.116134 | -0.078759 | -4.020840 |
| C  | 0.789209  | -2.740196 | 2.567493  |
| H  | -0.031010 | -2.138820 | 2.980650  |
| H  | 1.639772  | -2.753867 | 3.257412  |
| H  | 0.426653  | -3.763500 | 2.396818  |

|   |           |           |           |
|---|-----------|-----------|-----------|
| C | 3.485431  | -1.509500 | -0.272433 |
| H | 3.330114  | -1.607750 | 0.800092  |
| C | 4.784820  | -1.475424 | -0.789285 |
| H | 4.879311  | -1.654871 | -1.862906 |
| C | 5.960069  | -1.901644 | 0.006032  |
| C | 7.057233  | -2.481198 | -0.646526 |
| C | 6.020515  | -1.739763 | 1.399171  |
| C | 8.176761  | -2.901364 | 0.070029  |
| H | 7.028430  | -2.609090 | -1.732004 |
| C | 7.139199  | -2.156327 | 2.114978  |
| H | 5.190202  | -1.267600 | 1.929148  |
| C | 8.221768  | -2.741244 | 1.454306  |
| H | 9.018696  | -3.356158 | -0.456542 |
| H | 7.169899  | -2.019220 | 3.198196  |
| H | 9.098883  | -3.066881 | 2.017583  |
| C | 3.155698  | 1.791784  | -1.348804 |
| H | 2.786141  | 2.789229  | -1.596124 |
| C | 4.334271  | 1.328400  | -1.318268 |
| C | 5.465358  | 0.594055  | -1.155405 |
| H | 6.042482  | 0.304443  | -2.038001 |
| H | 6.047724  | 0.749752  | -0.242208 |
| P | -0.056084 | 1.906482  | 0.055904  |
| C | -1.445031 | 1.738071  | -1.115713 |
| C | -1.408545 | 2.418496  | -2.340574 |
| C | -2.487434 | 0.840384  | -0.861951 |
| C | -2.426134 | 2.233333  | -3.273924 |
| H | -0.589951 | 3.106544  | -2.566754 |
| C | -3.505667 | 0.652925  | -1.796819 |
| H | -2.509356 | 0.284868  | 0.078784  |
| C | -3.476126 | 1.355017  | -3.001320 |
| H | -2.394910 | 2.775707  | -4.221165 |
| H | -4.308261 | -0.058114 | -1.576870 |
| H | -4.272717 | 1.212924  | -3.734762 |
| C | 0.291239  | 3.700629  | 0.170514  |
| C | -0.666695 | 4.687392  | -0.094965 |
| C | 1.556872  | 4.079722  | 0.636504  |
| C | -0.358384 | 6.032627  | 0.098074  |
| H | -1.659645 | 4.410929  | -0.456512 |
| C | 1.860171  | 5.425801  | 0.834643  |
| H | 2.311430  | 3.317079  | 0.847130  |
| C | 0.903817  | 6.403566  | 0.563136  |
| H | -1.110844 | 6.794984  | -0.113565 |
| H | 2.849208  | 5.710154  | 1.199599  |
| H | 1.141185  | 7.458660  | 0.714613  |
| C | -0.749409 | 1.554824  | 1.710112  |
| C | -0.034193 | 0.726252  | 2.579025  |
| C | -1.923019 | 2.176615  | 2.159204  |
| C | -0.485742 | 0.520007  | 3.883772  |
| H | 0.884067  | 0.241129  | 2.237931  |
| C | -2.374912 | 1.964338  | 3.457748  |
| H | -2.490924 | 2.829661  | 1.491994  |
| C | -1.654879 | 1.136807  | 4.322401  |
| H | 0.081907  | -0.123717 | 4.558685  |
| H | -3.293745 | 2.445845  | 3.797750  |
| H | -2.010101 | 0.972789  | 5.341757  |

91

Figure\_S10-1\_PA-PPh3(Naborate)-prod(1,6) / electronic energy: -4278.76045462 a.u. / lowest freq: 14.94 cm-1

|    |           |           |           |
|----|-----------|-----------|-----------|
| Na | -2.622955 | -2.540640 | -0.144605 |
| B  | -5.331395 | -1.733535 | 0.530656  |
| O  | -4.853926 | -2.129985 | -0.838059 |
| O  | -5.908962 | -0.402668 | 0.646337  |
| O  | -4.108728 | -1.679818 | 1.376123  |
| C  | -4.998574 | 0.455426  | 1.260834  |
| C  | -4.073703 | -0.466642 | 2.070618  |
| O  | -6.306124 | -2.761881 | 0.869154  |
| C  | -5.725599 | -3.104312 | -1.341030 |
| C  | -6.259704 | -3.784732 | -0.078111 |
| H  | -5.513480 | 1.192417  | 1.902054  |
| H  | -4.418409 | 1.035785  | 0.512703  |
| H  | -4.450785 | -0.588237 | 3.105997  |
| H  | -3.041634 | -0.081449 | 2.139763  |
| H  | -5.196843 | -3.798479 | -2.016216 |
| H  | -6.555096 | -2.641441 | -1.912724 |
| H  | -5.571679 | -4.600277 | 0.234174  |
| H  | -7.255440 | -4.237335 | -0.228323 |
| Cu | 2.293872  | 1.222640  | 0.006960  |
| C  | 2.253912  | -1.150912 | -0.537993 |
| C  | 0.948356  | -1.715572 | -0.352024 |
| H  | 2.545644  | -1.133781 | -1.593693 |
| C  | 0.337808  | -1.935653 | 0.937175  |
| C  | 0.242854  | -2.196654 | -1.526463 |
| O  | 1.131949  | -1.587774 | 1.976199  |
| O  | -0.775658 | -2.394386 | 1.168848  |
| O  | -0.866747 | -2.717403 | -1.564340 |
| O  | 0.948113  | -2.067846 | -2.671363 |
| C  | 0.381071  | -2.626751 | -3.840066 |
| H  | 0.269411  | -3.716607 | -3.741088 |
| H  | 1.076811  | -2.397602 | -4.655546 |
| H  | -0.603136 | -2.189257 | -4.053233 |

|   |           |           |           |
|---|-----------|-----------|-----------|
| C | 0.649447  | -1.892621 | 3.272773  |
| H | -0.337826 | -1.443323 | 3.446524  |
| H | 1.382822  | -1.480531 | 3.976150  |
| H | 0.567702  | -2.979904 | 3.415201  |
| C | 3.232237  | -0.690394 | 0.324995  |
| H | 3.100976  | -0.813980 | 1.403392  |
| C | 4.661581  | -0.503228 | -0.166694 |
| H | 4.635435  | -0.413959 | -1.264736 |
| C | 5.544093  | -1.691306 | 0.175575  |
| C | 6.139255  | -2.449645 | -0.837362 |
| C | 5.771525  | -2.060541 | 1.507922  |
| C | 6.943169  | -3.548707 | -0.530883 |
| H | 5.968965  | -2.179150 | -1.882977 |
| C | 6.574756  | -3.155781 | 1.818302  |
| H | 5.310004  | -1.491594 | 2.319782  |
| C | 7.165036  | -3.904170 | 0.798385  |
| H | 7.398186  | -4.128478 | -1.337170 |
| H | 6.740133  | -3.427282 | 2.863315  |
| H | 7.794119  | -4.763437 | 1.041022  |
| C | 3.659752  | 2.902849  | -0.200230 |
| H | 3.222018  | 3.857858  | -0.448637 |
| C | 4.355790  | 1.931531  | 0.074492  |
| C | 5.255911  | 0.812708  | 0.378362  |
| H | 6.251415  | 1.010259  | -0.048053 |
| H | 5.377113  | 0.753448  | 1.472013  |
| P | 0.170027  | 2.035672  | -0.166315 |
| C | -0.833044 | 1.187643  | -1.429164 |
| C | -0.319945 | 1.120251  | -2.731189 |
| C | -2.070527 | 0.602976  | -1.149083 |
| C | -1.064550 | 0.527464  | -3.746720 |
| H | 0.662245  | 1.544629  | -2.957649 |
| C | -2.808812 | -0.008782 | -2.162225 |
| H | -2.465452 | 0.614916  | -0.132108 |
| C | -2.310070 | -0.034463 | -3.463417 |
| H | -0.661306 | 0.489850  | -4.760793 |
| H | -3.760577 | -0.489648 | -1.917181 |
| H | -2.887530 | -0.510570 | -4.258914 |
| C | 0.097638  | 3.813907  | -0.621378 |
| C | -0.574584 | 4.309051  | -1.741919 |
| C | 0.755629  | 4.710468  | 0.234419  |
| C | -0.580259 | 5.680375  | -2.006567 |
| H | -1.104726 | 3.630502  | -2.412646 |
| C | 0.744377  | 6.076993  | -0.029010 |
| H | 1.271291  | 4.338360  | 1.124914  |
| C | 0.078143  | 6.564659  | -1.155310 |
| H | -1.109021 | 6.056551  | -2.884715 |
| H | 1.256703  | 6.764054  | 0.647511  |
| H | 0.069918  | 7.636330  | -1.364628 |
| C | -0.804374 | 2.020863  | 1.378901  |
| C | -0.312609 | 1.330069  | 2.489766  |
| C | -1.997351 | 2.750066  | 1.490346  |
| C | -1.001902 | 1.370862  | 3.703008  |
| H | 0.614457  | 0.758509  | 2.402636  |
| C | -2.686167 | 2.782708  | 2.698808  |
| H | -2.385245 | 3.302518  | 0.630891  |
| C | -2.185730 | 2.097300  | 3.808037  |
| H | -0.607872 | 0.836704  | 4.569707  |
| H | -3.617224 | 3.347261  | 2.777412  |
| H | -2.723648 | 2.129735  | 4.757645  |

91

Figure\_S10-1\_PA-PPh3(Naborate)-ed(1,4AA) / electronic energy: -4278.72067874 a.u. / lowest freq: 13.62 cm-1

|    |           |           |           |
|----|-----------|-----------|-----------|
| Na | 3.203491  | 1.752391  | -1.207225 |
| B  | 5.510153  | 2.111525  | 0.413926  |
| O  | 5.387495  | 1.235304  | -0.784571 |
| O  | 5.253851  | 1.449395  | 1.697562  |
| O  | 4.413270  | 3.112850  | 0.306956  |
| C  | 4.127668  | 2.006937  | 2.307548  |
| C  | 3.922175  | 3.348795  | 1.597519  |
| O  | 6.869753  | 2.627072  | 0.343358  |
| C  | 6.649757  | 1.093813  | -1.372167 |
| C  | 7.400651  | 2.349374  | -0.917010 |
| H  | 4.272998  | 2.120000  | 3.396045  |
| H  | 3.233068  | 1.365548  | 2.156615  |
| H  | 4.495745  | 4.152260  | 2.102022  |
| H  | 2.862696  | 3.649227  | 1.564158  |
| H  | 6.569342  | 1.013094  | -2.469470 |
| H  | 7.157724  | 0.179953  | -1.003250 |
| H  | 7.219365  | 3.181093  | -1.630801 |
| H  | 8.491926  | 2.193157  | -0.863682 |
| Cu | -1.840818 | -0.390251 | -0.446973 |
| C  | -1.903008 | 1.426687  | -1.375833 |
| C  | -0.548897 | 1.109210  | -1.101034 |
| H  | -2.243669 | 1.173929  | -2.384884 |
| C  | 0.167882  | 1.641346  | 0.089787  |
| C  | 0.284519  | 0.528639  | -2.187505 |
| O  | -0.577318 | 1.562978  | 1.189742  |
| O  | 1.297570  | 2.075039  | 0.105018  |
| O  | 1.476854  | 0.689194  | -2.333698 |
| O  | -0.434781 | -0.231156 | -3.010346 |

|   |           |           |           |
|---|-----------|-----------|-----------|
| C | 0.247785  | -0.835571 | -4.105171 |
| H | 0.652940  | -0.067423 | -4.777681 |
| H | -0.499793 | -1.439945 | -4.628343 |
| H | 1.066272  | -1.470202 | -3.740403 |
| C | -0.014384 | 2.054840  | 2.403980  |
| H | 0.916586  | 1.521625  | 2.638735  |
| H | -0.764416 | 1.868472  | 3.178445  |
| H | 0.194735  | 3.129815  | 2.320725  |
| C | -2.747793 | 2.372009  | -0.660158 |
| H | -2.404876 | 2.730220  | 0.311389  |
| C | -3.932426 | 2.769268  | -1.164593 |
| H | -4.237760 | 2.365812  | -2.136682 |
| C | -4.888146 | 3.695977  | -0.545504 |
| C | -6.090993 | 3.972355  | -1.215720 |
| C | -4.657471 | 4.321369  | 0.692714  |
| C | -7.033628 | 4.841934  | -0.671426 |
| H | -6.287212 | 3.494254  | -2.178905 |
| C | -5.597762 | 5.190584  | 1.235630  |
| H | -3.732285 | 4.130698  | 1.240169  |
| C | -6.790128 | 5.454636  | 0.556964  |
| H | -7.963425 | 5.040654  | -1.208615 |
| H | -5.400795 | 5.667427  | 2.198199  |
| H | -7.526102 | 6.137948  | 0.986011  |
| C | -3.750167 | -0.827175 | -0.334735 |
| H | -4.522475 | -0.111631 | -0.656472 |
| C | -4.123909 | -1.980034 | 0.144568  |
| C | -4.410216 | -3.169070 | 0.641773  |
| H | -4.486460 | -4.048351 | -0.006794 |
| H | -4.561935 | -3.315452 | 1.716169  |
| P | -0.517266 | -2.124543 | 0.296260  |
| C | -1.067131 | -3.689725 | -0.466776 |
| C | -0.910054 | -4.934118 | 0.151608  |
| C | -1.667399 | -3.616790 | -1.729529 |
| C | -1.349484 | -6.092081 | -0.487678 |
| H | -0.454674 | -5.005802 | 1.141480  |
| C | -2.097304 | -4.776362 | -2.371113 |
| H | -1.814680 | -2.644547 | -2.206976 |
| C | -1.941899 | -6.014887 | -1.748701 |
| H | -1.230526 | -7.059922 | 0.003633  |
| H | -2.567306 | -4.709741 | -3.354361 |
| H | -2.288378 | -6.923605 | -2.245576 |
| C | -0.580059 | -2.361946 | 2.103884  |
| C | 0.412933  | -3.054815 | 2.810156  |
| C | -1.674941 | -1.828840 | 2.796154  |
| C | 0.303461  | -3.220291 | 4.189191  |
| H | 1.281618  | -3.460051 | 2.285716  |
| C | -1.781668 | -1.998632 | 4.175894  |
| H | -2.448958 | -1.282545 | 2.250655  |
| C | -0.793987 | -2.694075 | 4.872411  |
| H | 1.081149  | -3.760456 | 4.732964  |
| H | -2.639125 | -1.580894 | 4.707225  |
| H | -0.877203 | -2.824540 | 5.953483  |
| C | 1.263991  | -2.020831 | -0.106136 |
| C | 1.800569  | -2.692159 | -1.209301 |
| C | 2.084574  | -1.158380 | 0.636455  |
| C | 3.135630  | -2.498169 | -1.567359 |
| H | 1.177261  | -3.370713 | -1.796178 |
| C | 3.419626  | -0.976174 | 0.287447  |
| H | 1.681015  | -0.633107 | 1.506253  |
| C | 3.942595  | -1.640994 | -0.824070 |
| H | 3.543256  | -3.024118 | -2.433403 |
| H | 4.064647  | -0.302138 | 0.858645  |
| H | 4.983946  | -1.473825 | -1.103261 |

91

Figure\_S10-1\_PA-PPh3(Naborate)-ts(1,4AA) / electronic energy: -4278.69171118 a.u. / lowest freq: -303.45 cm-1

|    |           |           |           |
|----|-----------|-----------|-----------|
| Na | -2.999672 | -2.236202 | -0.189698 |
| B  | -5.872398 | -2.380440 | -0.054254 |
| O  | -5.039030 | -1.172674 | -0.369702 |
| O  | -6.669795 | -2.297751 | 1.157462  |
| O  | -4.892704 | -3.478917 | 0.223619  |
| C  | -6.049949 | -3.036352 | 2.166196  |
| C  | -5.268250 | -4.116445 | 1.413675  |
| O  | -6.704600 | -2.549856 | -1.234077 |
| C  | -5.538898 | -0.576054 | -1.535551 |
| C  | -6.223091 | -1.737290 | -2.261321 |
| H  | -6.792330 | -3.458260 | 2.865628  |
| H  | -5.353959 | -2.408369 | 2.763509  |
| H  | -5.914141 | -4.994017 | 1.209118  |
| H  | -4.383868 | -4.473273 | 1.968979  |
| H  | -4.726191 | -0.115610 | -2.123058 |
| H  | -6.272224 | 0.218700  | -1.291274 |
| H  | -5.486235 | -2.275134 | -2.896061 |
| H  | -7.041015 | -1.401431 | -2.921884 |
| Cu | 1.408156  | 0.524595  | 0.042920  |
| C  | 2.096821  | -1.326330 | -0.699579 |
| C  | 0.634273  | -1.347093 | -0.461464 |
| H  | 2.306812  | -1.204999 | -1.763540 |
| C  | 0.055828  | -1.702905 | 0.828243  |
| C  | -0.266004 | -1.112463 | -1.586284 |

|   |           |           |           |
|---|-----------|-----------|-----------|
| O | 0.940407  | -1.545467 | 1.834598  |
| O | -1.091684 | -2.046248 | 1.063809  |
| O | -1.465170 | -1.337851 | -1.625439 |
| O | 0.359190  | -0.565296 | -2.645038 |
| C | -0.436872 | -0.262367 | -3.780961 |
| H | -0.914753 | -1.167904 | -4.179481 |
| H | 0.248506  | 0.157823  | -4.525085 |
| H | -1.214144 | 0.471825  | -3.526598 |
| C | 0.482389  | -1.807696 | 3.153702  |
| H | -0.310929 | -1.101543 | 3.435668  |
| H | 1.351014  | -1.673403 | 3.806787  |
| H | 0.098463  | -2.833175 | 3.239661  |
| C | 2.962013  | -2.347022 | -0.068140 |
| H | 2.752973  | -2.599432 | 0.971511  |
| C | 3.951944  | -2.947966 | -0.745051 |
| H | 4.138275  | -2.633517 | -1.778660 |
| C | 4.851807  | -3.997604 | -0.240106 |
| C | 5.911124  | -4.429220 | -1.053690 |
| C | 4.702212  | -4.590389 | 1.025653  |
| C | 6.798313  | -5.412113 | -0.618652 |
| H | 6.041405  | -3.981499 | -2.042463 |
| C | 5.586460  | -5.572488 | 1.460212  |
| H | 3.882606  | -4.286505 | 1.680057  |
| C | 6.639360  | -5.987352 | 0.641050  |
| H | 7.616290  | -5.730492 | -1.268564 |
| H | 5.452036  | -6.022594 | 2.446281  |
| H | 7.331928  | -6.758501 | 0.985016  |
| C | 3.378334  | 0.279748  | -0.201901 |
| H | 3.935217  | 0.077726  | 0.720325  |
| C | 3.926339  | 0.882078  | -1.219789 |
| C | 4.420628  | 1.451833  | -2.296328 |
| H | 4.947070  | 0.863782  | -3.055346 |
| H | 4.323834  | 2.530039  | -2.458770 |
| P | 0.480294  | 2.534319  | 0.351053  |
| C | 1.061576  | 3.641468  | -0.982266 |
| C | 1.330286  | 5.000445  | -0.783781 |
| C | 1.225113  | 3.082103  | -2.256277 |
| C | 1.745559  | 5.792395  | -1.853631 |
| H | 1.221322  | 5.443605  | 0.209148  |
| C | 1.635248  | 3.877396  | -3.324018 |
| H | 1.043665  | 2.014901  | -2.414197 |
| C | 1.895654  | 5.233093  | -3.123056 |
| H | 1.953423  | 6.852254  | -1.693452 |
| H | 1.763114  | 3.432553  | -4.312929 |
| H | 2.222980  | 5.856241  | -3.958059 |
| C | 1.013689  | 3.341019  | 1.899777  |
| C | 0.121484  | 3.865050  | 2.839445  |
| C | 2.393117  | 3.386423  | 2.153557  |
| C | 0.605297  | 4.439821  | 4.016417  |
| H | -0.954876 | 3.825847  | 2.660157  |
| C | 2.870993  | 3.969506  | 3.323194  |
| H | 3.096515  | 2.965053  | 1.428845  |
| C | 1.976271  | 4.496941  | 4.257366  |
| H | -0.098057 | 4.844852  | 4.746899  |
| H | 3.946095  | 4.008666  | 3.509720  |
| H | 2.351899  | 4.950013  | 5.177215  |
| C | -1.337521 | 2.655751  | 0.299414  |
| C | -1.988437 | 3.881591  | 0.102152  |
| C | -2.094484 | 1.488029  | 0.448129  |
| C | -3.379267 | 3.934924  | 0.068405  |
| H | -1.409812 | 4.798935  | -0.030829 |
| C | -3.488572 | 1.541297  | 0.412245  |
| H | -1.596214 | 0.524826  | 0.579725  |
| C | -4.127556 | 2.765796  | 0.223175  |
| H | -3.881033 | 4.892374  | -0.086011 |
| H | -4.072073 | 0.620564  | 0.500005  |
| H | -5.218432 | 2.808590  | 0.186677  |

91

Figure\_S10-1\_PA-PPh3(Naborate)-prod(1,4AA) / electronic energy: -4278.74542342 a.u. / lowest freq: 12.03 cm<sup>-1</sup>

|    |           |           |           |
|----|-----------|-----------|-----------|
| Na | 1.237607  | -2.982167 | -0.555057 |
| B  | 1.269972  | -5.803548 | 0.052664  |
| O  | 0.154136  | -5.031671 | -0.594186 |
| O  | 0.979807  | -6.345109 | 1.369791  |
| O  | 2.358106  | -4.807747 | 0.294553  |
| C  | 1.585666  | -5.542743 | 2.337835  |
| C  | 2.794136  | -4.935187 | 1.619946  |
| O  | 1.567311  | -6.855401 | -0.906977 |
| C  | -0.300088 | -5.753097 | -1.706121 |
| C  | 0.921674  | -6.581143 | -2.112981 |
| H  | 1.871910  | -6.134319 | 3.224840  |
| H  | 0.904178  | -4.735926 | 2.683966  |
| H  | 3.668870  | -5.613271 | 1.687455  |
| H  | 3.091516  | -3.957445 | 2.035338  |
| H  | -0.648725 | -5.073751 | -2.503046 |
| H  | -1.145832 | -6.415570 | -1.431553 |
| H  | 1.568388  | -5.991156 | -2.797782 |
| H  | 0.647648  | -7.511617 | -2.639544 |
| Cu | -0.594211 | 1.452941  | 0.491386  |
| C  | 1.842076  | 2.183052  | -0.004966 |

|   |           |           |           |
|---|-----------|-----------|-----------|
| C | 1.335238  | 0.724352  | -0.072742 |
| H | 1.658069  | 2.620997  | -0.992596 |
| C | 1.566201  | -0.183078 | 1.037776  |
| C | 1.050615  | 0.145041  | -1.376957 |
| O | 1.985678  | 0.457422  | 2.151187  |
| O | 1.387904  | -1.395467 | 1.070274  |
| O | 0.926935  | -1.040081 | -1.658874 |
| O | 0.884712  | 1.076809  | -2.342331 |
| C | 0.576527  | 0.604750  | -3.642910 |
| H | 1.362731  | -0.065769 | -4.017160 |
| H | 0.509136  | 1.493969  | -4.279815 |
| H | -0.381840 | 0.065292  | -3.649116 |
| C | 2.188409  | -0.329813 | 3.312708  |
| H | 1.259279  | -0.832643 | 3.615976  |
| H | 2.510839  | 0.365065  | 4.095895  |
| H | 2.963787  | -1.090396 | 3.144383  |
| C | 3.308878  | 2.330648  | 0.300170  |
| H | 3.639901  | 1.928504  | 1.261384  |
| C | 4.180324  | 2.907110  | -0.537099 |
| H | 3.804333  | 3.314506  | -1.483450 |
| C | 5.629624  | 3.073805  | -0.313679 |
| C | 6.370632  | 3.874076  | -1.196726 |
| C | 6.309034  | 2.464163  | 0.754850  |
| C | 7.738538  | 4.072989  | -1.013946 |
| H | 5.862878  | 4.351096  | -2.039429 |
| C | 7.674102  | 2.661283  | 0.938529  |
| H | 5.766517  | 1.819113  | 1.448970  |
| C | 8.395958  | 3.468597  | 0.056460  |
| H | 8.293707  | 4.703111  | -1.712386 |
| H | 8.181335  | 2.177000  | 1.776086  |
| H | 9.467372  | 3.621455  | 0.202546  |
| C | 0.959954  | 2.944008  | 0.991430  |
| H | 1.155171  | 2.783871  | 2.059081  |
| C | -0.033250 | 3.747246  | 0.627883  |
| C | -0.902056 | 4.659263  | 0.264067  |
| H | -0.591607 | 5.706041  | 0.178675  |
| H | -1.942353 | 4.417381  | 0.028529  |
| P | -2.752428 | 1.023900  | 0.170311  |
| C | -3.444455 | 2.117554  | -1.120229 |
| C | -4.737435 | 2.647586  | -1.054972 |
| C | -2.618228 | 2.438356  | -2.206677 |
| C | -5.201808 | 3.481055  | -2.072591 |
| H | -5.384720 | 2.415948  | -0.205776 |
| C | -3.088070 | 3.264877  | -3.224095 |
| H | -1.596162 | 2.049763  | -2.250777 |
| C | -4.380469 | 3.788081  | -3.156882 |
| H | -6.210225 | 3.895631  | -2.014145 |
| H | -2.438053 | 3.511312  | -4.066095 |
| H | -4.745411 | 4.444657  | -3.949481 |
| C | -3.803461 | 1.305047  | 1.636885  |
| C | -4.904050 | 0.505773  | 1.963249  |
| C | -3.475878 | 2.396570  | 2.453536  |
| C | -5.675090 | 0.805845  | 3.086774  |
| H | -5.161911 | -0.356213 | 1.343963  |
| C | -4.252970 | 2.698657  | 3.568527  |
| H | -2.603727 | 3.013349  | 2.216783  |
| C | -5.354368 | 1.902461  | 3.886052  |
| H | -6.530959 | 0.176117  | 3.338161  |
| H | -3.991996 | 3.552557  | 4.196941  |
| H | -5.960193 | 2.133880  | 4.764708  |
| C | -3.089436 | -0.673513 | -0.398154 |
| C | -4.230260 | -1.007666 | -1.139360 |
| C | -2.159261 | -1.668051 | -0.070391 |
| C | -4.444550 | -2.328225 | -1.529104 |
| H | -4.951390 | -0.236068 | -1.420359 |
| C | -2.377118 | -2.990208 | -0.457100 |
| H | -1.247186 | -1.406845 | 0.475279  |
| C | -3.521101 | -3.317255 | -1.185758 |
| H | -5.334921 | -2.584844 | -2.107003 |
| H | -1.638193 | -3.759413 | -0.213457 |
| H | -3.688989 | -4.351195 | -1.495473 |

91

Figure\_S10-1\_PA-PPh3(Naborate)-ed(1,4) / electronic energy: -4278.71589517 a.u. / lowest freq: 9.25 cm-1

|    |           |          |           |
|----|-----------|----------|-----------|
| H  | -0.852673 | 3.719231 | 3.095791  |
| C  | -0.470025 | 3.324873 | 2.138573  |
| H  | -0.066313 | 2.310006 | 2.331625  |
| H  | -2.265593 | 4.100426 | 1.164305  |
| O  | 0.510253  | 4.160996 | 1.601542  |
| H  | -2.129968 | 2.324688 | 1.079819  |
| C  | -1.548839 | 3.262198 | 1.055012  |
| B  | 0.426244  | 4.140304 | 0.144103  |
| O  | -0.822815 | 3.372101 | -0.137542 |
| O  | 0.494750  | 5.485982 | -0.404412 |
| H  | 3.167210  | 4.665602 | -0.522157 |
| O  | 1.522470  | 3.403907 | -0.564775 |
| Na | 0.230950  | 1.656733 | -1.257477 |
| C  | 2.344851  | 4.348593 | -1.194285 |
| C  | 1.392646  | 5.513134 | -1.472229 |
| H  | 1.916011  | 6.483254 | -1.529848 |

|    |            |           |           |
|----|------------|-----------|-----------|
| H  | 0.877259   | 5.358708  | -2.444462 |
| H  | 2.796312   | 3.930703  | -2.107603 |
| Cu | 1.068720   | -2.409236 | -0.069549 |
| C  | -3.550995  | -0.409555 | 0.653862  |
| C  | -2.336775  | -0.398246 | 0.044327  |
| H  | -3.532659  | -0.310068 | 1.743149  |
| C  | -2.131659  | -0.510576 | -1.426550 |
| C  | -1.106423  | -0.278477 | 0.865618  |
| O  | -2.978753  | -1.346989 | -2.001275 |
| O  | -1.281936  | 0.087500  | -2.056730 |
| O  | -0.010596  | 0.025517  | 0.426834  |
| O  | -1.300871  | -0.558636 | 2.140538  |
| C  | -0.150291  | -0.627124 | 2.979081  |
| H  | 0.538185   | -1.397511 | 2.604645  |
| H  | -0.518789  | -0.897921 | 3.972987  |
| H  | 0.376870   | 0.335707  | 3.009836  |
| C  | -2.850578  | -1.537256 | -3.407146 |
| H  | -2.969458  | -0.584302 | -3.939964 |
| H  | -3.643975  | -2.235769 | -3.690027 |
| H  | -1.866932  | -1.966257 | -3.641509 |
| C  | -4.862634  | -0.490509 | 0.059758  |
| H  | -4.941770  | -0.595746 | -1.022167 |
| C  | -5.965040  | -0.442897 | 0.840557  |
| H  | -5.821314  | -0.337543 | 1.921975  |
| C  | -7.361258  | -0.513511 | 0.402590  |
| C  | -8.376165  | -0.396981 | 1.366634  |
| C  | -7.730895  | -0.693780 | -0.942480 |
| C  | -9.719306  | -0.454732 | 1.002423  |
| H  | -8.104892  | -0.257263 | 2.416036  |
| C  | -9.071686  | -0.752317 | -1.305420 |
| H  | -6.965857  | -0.792813 | -1.714664 |
| C  | -10.070078 | -0.632722 | -0.335200 |
| H  | -10.494239 | -0.361871 | 1.765922  |
| H  | -9.341947  | -0.894616 | -2.353696 |
| H  | -11.122206 | -0.680835 | -0.623956 |
| C  | -0.499670  | -3.489452 | -0.412586 |
| H  | -0.632093  | -3.998968 | -1.381963 |
| C  | -1.477994  | -3.659309 | 0.435753  |
| C  | -2.451548  | -3.800963 | 1.317366  |
| H  | -2.453438  | -4.620118 | 2.043854  |
| H  | -3.293066  | -3.100002 | 1.342591  |
| P  | 2.951451   | -1.198211 | 0.072383  |
| C  | 4.523596   | -2.133061 | 0.016189  |
| C  | 5.732188   | -1.619257 | 0.503522  |
| C  | 4.507178   | -3.394993 | -0.590171 |
| C  | 6.907672   | -2.356686 | 0.377808  |
| H  | 5.757379   | -0.643734 | 0.995115  |
| C  | 5.685921   | -4.128207 | -0.721141 |
| H  | 3.564123   | -3.806553 | -0.961373 |
| C  | 6.886494   | -3.609378 | -0.237569 |
| H  | 7.844977   | -1.950590 | 0.763786  |
| H  | 5.663470   | -5.110539 | -1.197170 |
| H  | 7.809822   | -4.184348 | -0.335407 |
| C  | 3.089288   | -0.123236 | 1.541897  |
| C  | 2.740742   | 1.230345  | 1.507461  |
| C  | 3.413430   | -0.719768 | 2.769523  |
| C  | 2.720638   | 1.979353  | 2.685163  |
| H  | 2.459269   | 1.735422  | 0.579838  |
| C  | 3.400633   | 0.032466  | 3.941391  |
| H  | 3.674457   | -1.780880 | 2.814786  |
| C  | 3.050896   | 1.384263  | 3.901168  |
| H  | 2.406671   | 3.024503  | 2.627807  |
| H  | 3.656483   | -0.441956 | 4.891176  |
| H  | 3.030368   | 1.969943  | 4.823036  |
| C  | 3.063122   | -0.096674 | -1.387701 |
| C  | 4.091261   | 0.840474  | -1.550479 |
| C  | 2.107894   | -0.248705 | -2.400377 |
| C  | 4.157492   | 1.613322  | -2.706173 |
| H  | 4.845587   | 0.971094  | -0.771131 |
| C  | 2.171221   | 0.532375  | -3.555849 |
| H  | 1.299562   | -0.976273 | -2.283490 |
| C  | 3.196510   | 1.463853  | -3.708421 |
| H  | 4.960348   | 2.343832  | -2.823114 |
| H  | 1.416177   | 0.408796  | -4.334960 |
| H  | 3.249406   | 2.075710  | -4.611361 |

91

Figure\_S10-1\_PA-PPh3(Naborate)-ts(1,4) / electronic energy: -4278.69317096 a.u. / lowest freq: -422.93 cm-1

|    |           |          |           |
|----|-----------|----------|-----------|
| Na | -0.780394 | 1.830266 | -0.336477 |
| H  | -3.271108 | 4.438886 | 3.232364  |
| C  | -2.618527 | 3.988561 | 2.463857  |
| H  | -1.703968 | 3.623147 | 2.978750  |
| H  | -3.189141 | 1.863269 | 2.237424  |
| H  | -4.378170 | 3.029751 | 1.590852  |
| C  | -3.294487 | 2.832567 | 1.722702  |
| O  | -2.308319 | 4.909553 | 1.459600  |
| O  | -2.635145 | 2.822401 | 0.490106  |
| B  | -2.240006 | 4.227544 | 0.174685  |
| O  | -3.056972 | 4.901299 | -0.828796 |
| C  | -2.386485 | 4.874575 | -2.050509 |

|    |           |           |           |
|----|-----------|-----------|-----------|
| H  | -2.639096 | 3.962907  | -2.634700 |
| H  | -2.650778 | 5.748293  | -2.671578 |
| O  | -0.889314 | 4.130978  | -0.461875 |
| H  | -0.524904 | 5.883608  | -1.512714 |
| C  | -0.905213 | 4.853381  | -1.662751 |
| H  | -0.268215 | 4.370131  | -2.424202 |
| H  | 6.260060  | -0.427357 | -1.783093 |
| C  | 6.186100  | -0.209735 | -0.710914 |
| C  | 4.964374  | -0.207460 | -0.145880 |
| C  | 3.767032  | -0.466326 | -0.944263 |
| H  | 3.974164  | -0.587492 | -2.007523 |
| C  | 2.472758  | 0.032578  | -0.683614 |
| C  | 1.526218  | 0.066163  | -1.779696 |
| Cu | -0.079029 | -1.585163 | -0.572440 |
| C  | 1.963017  | 0.309119  | 0.656341  |
| O  | 2.731091  | -0.183108 | 1.629519  |
| O  | 0.309038  | 0.312502  | -1.682457 |
| O  | 0.929920  | 0.912551  | 0.925605  |
| C  | 2.310863  | 0.038186  | 2.968469  |
| H  | 2.154175  | 1.108141  | 3.160754  |
| H  | 3.113210  | -0.348812 | 3.605370  |
| H  | 1.377899  | -0.505581 | 3.173995  |
| O  | 2.041965  | -0.216651 | -2.971121 |
| C  | 1.142882  | -0.322832 | -4.066375 |
| H  | 1.757577  | -0.573433 | -4.936922 |
| H  | 0.616530  | 0.626147  | -4.234861 |
| H  | 0.406523  | -1.119280 | -3.884991 |
| C  | 7.467577  | 0.053036  | -0.041273 |
| C  | 7.575439  | 0.292328  | 1.340275  |
| C  | 8.643115  | 0.059338  | -0.809675 |
| C  | 8.814606  | 0.528486  | 1.926100  |
| H  | 6.682714  | 0.290951  | 1.968887  |
| C  | 9.884686  | 0.296277  | -0.223342 |
| H  | 8.578229  | -0.125193 | -1.885127 |
| C  | 9.974895  | 0.531538  | 1.147754  |
| H  | 8.878556  | 0.710348  | 3.001090  |
| H  | 10.785764 | 0.296221  | -0.840579 |
| H  | 10.946110 | 0.715473  | 1.611974  |
| H  | 4.832701  | 0.000460  | 0.915222  |
| C  | 1.192493  | -3.127896 | -0.594889 |
| H  | 0.651241  | -4.077906 | -0.522170 |
| C  | 2.458919  | -3.022533 | -0.661763 |
| C  | 3.773636  | -2.689405 | -0.705118 |
| H  | 4.336550  | -2.860206 | -1.627053 |
| H  | 4.345373  | -2.738808 | 0.225778  |
| P  | -2.258700 | -1.512818 | 0.055210  |
| C  | -2.546909 | -1.223087 | 1.838308  |
| C  | -3.658960 | -1.746640 | 2.509969  |
| C  | -1.632287 | -0.424164 | 2.536354  |
| C  | -3.862532 | -1.457701 | 3.858059  |
| H  | -4.368713 | -2.386598 | 1.980051  |
| C  | -1.841043 | -0.135980 | 3.884703  |
| H  | -0.750705 | -0.021085 | 2.030784  |
| C  | -2.956148 | -0.649689 | 4.545868  |
| H  | -4.733086 | -1.868124 | 4.373710  |
| H  | -1.126068 | 0.492929  | 4.419458  |
| H  | -3.117652 | -0.426306 | 5.602545  |
| C  | -3.098542 | -3.106693 | -0.266567 |
| C  | -4.287757 | -3.210449 | -0.993939 |
| C  | -2.497594 | -4.267496 | 0.241836  |
| C  | -4.873379 | -4.460641 | -1.202103 |
| H  | -4.763226 | -2.314911 | -1.399480 |
| C  | -3.088604 | -5.511338 | 0.040033  |
| H  | -1.562995 | -4.195977 | 0.805654  |
| C  | -4.278660 | -5.609467 | -0.684431 |
| H  | -5.803503 | -4.533104 | -1.769612 |
| H  | -2.617178 | -6.408616 | 0.446127  |
| H  | -4.741257 | -6.585365 | -0.846204 |
| C  | -3.279665 | -0.260549 | -0.798618 |
| C  | -4.446486 | 0.276930  | -0.243556 |
| C  | -2.861873 | 0.164562  | -2.067124 |
| C  | -5.184893 | 1.222537  | -0.948734 |
| H  | -4.773653 | -0.028251 | 0.752413  |
| C  | -3.603870 | 1.112515  | -2.769874 |
| H  | -1.938369 | -0.230036 | -2.497445 |
| C  | -4.765534 | 1.642366  | -2.210381 |
| H  | -6.086114 | 1.647445  | -0.502689 |
| H  | -3.266860 | 1.443346  | -3.754630 |
| H  | -5.339004 | 2.396365  | -2.753299 |

91

Figure\_S10-1\_PA-PPh3(Naborate)-prod(1,4) / electronic energy: -4278.76423088 a.u. / lowest freq: 15.32 cm-1

|   |           |          |           |
|---|-----------|----------|-----------|
| H | -0.416938 | 4.699840 | 2.746527  |
| C | -0.105547 | 4.163797 | 1.832788  |
| H | -0.143162 | 3.076733 | 2.039995  |
| H | -1.356178 | 5.532740 | 0.671955  |
| O | 1.175794  | 4.559734 | 1.431312  |
| H | -1.873407 | 3.822963 | 0.567168  |
| C | -0.993817 | 4.485592 | 0.629075  |
| B | 1.261012  | 4.513046 | -0.024222 |



|    |           |           |           |
|----|-----------|-----------|-----------|
| O  | -0.144193 | 4.291452  | -0.468732 |
| O  | 1.925346  | 5.697598  | -0.549254 |
| H  | 4.056079  | 3.876507  | -0.447629 |
| O  | 2.050882  | 3.371817  | -0.597308 |
| Na | 0.230762  | 2.131429  | -1.257984 |
| C  | 3.218595  | 3.886615  | -1.174303 |
| C  | 2.834390  | 5.322485  | -1.537929 |
| H  | 3.704964  | 6.001284  | -1.558215 |
| H  | 2.372609  | 5.348544  | -2.548468 |
| H  | 3.524974  | 3.287822  | -2.046233 |
| Cu | 0.072205  | -2.181656 | -0.238765 |
| C  | -2.813379 | -2.003677 | -0.043807 |
| C  | -1.695449 | -0.999707 | -0.409354 |
| H  | -2.741233 | -2.142404 | 1.041556  |
| C  | -1.568308 | -0.552771 | -1.793814 |
| C  | -1.388529 | 0.013011  | 0.607975  |
| O  | -2.236256 | -1.338231 | -2.661470 |
| O  | -0.920858 | 0.396674  | -2.223028 |
| O  | -0.800654 | 1.072576  | 0.446733  |
| O  | -1.814773 | -0.329810 | 1.835510  |
| C  | -1.553418 | 0.590985  | 2.881734  |
| H  | -0.475743 | 0.773563  | 2.986433  |
| H  | -1.947975 | 0.131572  | 3.794875  |
| H  | -2.059535 | 1.549112  | 2.695954  |
| C  | -2.117034 | -1.030039 | -4.039921 |
| H  | -2.490031 | -0.018617 | -4.252320 |
| H  | -2.724829 | -1.771506 | -4.570116 |
| H  | -1.070790 | -1.099827 | -4.370744 |
| C  | -4.188566 | -1.468438 | -0.340512 |
| H  | -4.428026 | -1.327828 | -1.399710 |
| C  | -5.068681 | -1.128955 | 0.609930  |
| H  | -4.775222 | -1.270473 | 1.656803  |
| C  | -6.413118 | -0.554056 | 0.413124  |
| C  | -7.161840 | -0.180100 | 1.539839  |
| C  | -6.986773 | -0.359278 | -0.854990 |
| C  | -8.434524 | 0.373809  | 1.409823  |
| H  | -6.733242 | -0.324275 | 2.535296  |
| C  | -8.257504 | 0.192570  | -0.986860 |
| H  | -6.435046 | -0.643966 | -1.753503 |
| C  | -8.988210 | 0.563123  | 0.144712  |
| H  | -8.995425 | 0.658967  | 2.302821  |
| H  | -8.684383 | 0.334921  | -1.982300 |
| H  | -9.984347 | 0.997966  | 0.037683  |
| C  | -0.094857 | -4.301785 | -0.170824 |
| H  | 0.763530  | -4.918664 | 0.046525  |
| C  | -1.209663 | -3.840982 | -0.412833 |
| C  | -2.590453 | -3.401117 | -0.660559 |
| H  | -3.287872 | -4.131780 | -0.221859 |
| H  | -2.762233 | -3.381169 | -1.745226 |
| P  | 2.149912  | -1.397271 | 0.224225  |
| C  | 3.424387  | -2.682227 | 0.532092  |
| C  | 4.397544  | -2.584491 | 1.532456  |
| C  | 3.447025  | -3.778978 | -0.340210 |
| C  | 5.371988  | -3.574354 | 1.661753  |
| H  | 4.400629  | -1.734539 | 2.217955  |
| C  | 4.425508  | -4.762470 | -0.214486 |
| H  | 2.698610  | -3.857822 | -1.133936 |
| C  | 5.387960  | -4.663113 | 0.791155  |
| H  | 6.126060  | -3.489879 | 2.446982  |
| H  | 4.435183  | -5.609260 | -0.903832 |
| H  | 6.152891  | -5.435596 | 0.894342  |
| C  | 2.151923  | -0.350178 | 1.720283  |
| C  | 2.269139  | 1.040596  | 1.644704  |
| C  | 1.938919  | -0.959344 | 2.966911  |
| C  | 2.214728  | 1.810761  | 2.807832  |
| H  | 2.384177  | 1.561783  | 0.689673  |
| C  | 1.901945  | -0.188977 | 4.125940  |
| H  | 1.815566  | -2.043616 | 3.039271  |
| C  | 2.046236  | 1.198563  | 4.047674  |
| H  | 2.276670  | 2.897275  | 2.709652  |
| H  | 1.750768  | -0.673253 | 5.092984  |
| H  | 2.009344  | 1.802457  | 4.957207  |
| C  | 2.943811  | -0.409906 | -1.094468 |
| C  | 4.259569  | 0.054599  | -0.955219 |
| C  | 2.259511  | -0.186982 | -2.292415 |
| C  | 4.878871  | 0.726464  | -2.003428 |
| H  | 4.806164  | -0.117027 | -0.024670 |
| C  | 2.880862  | 0.493981  | -3.341597 |
| H  | 1.230403  | -0.531483 | -2.411586 |
| C  | 4.191326  | 0.943399  | -3.200350 |
| H  | 5.903093  | 1.086074  | -1.887002 |
| H  | 2.337358  | 0.664979  | -4.273115 |
| H  | 4.680801  | 1.468980  | -4.023070 |

32

Figure S11-1\_dienoate / electronic energy: -841.927078481 a.u. / lowest freq: 24.55 cm-1

|   |           |           |           |
|---|-----------|-----------|-----------|
| C | -0.660544 | -0.726572 | 0.059153  |
| C | -1.860539 | -0.097447 | 0.115996  |
| H | -0.691600 | -1.818492 | -0.004770 |
| C | -1.976243 | 1.390665  | 0.160143  |

|   |           |           |           |
|---|-----------|-----------|-----------|
| C | -3.120576 | -0.891785 | 0.187355  |
| O | -3.041424 | 1.823605  | -0.507466 |
| O | -1.182749 | 2.134043  | 0.689285  |
| O | -4.147702 | -0.497504 | 0.683440  |
| O | -2.981802 | -2.118850 | -0.320932 |
| C | -4.097604 | -2.989729 | -0.195724 |
| H | -4.332384 | -3.170881 | 0.862818  |
| H | -3.810049 | -3.927003 | -0.683244 |
| H | -4.981752 | -2.562067 | -0.688186 |
| C | -3.254671 | 3.228152  | -0.535442 |
| H | -3.354009 | 3.627502  | 0.483524  |
| H | -4.184056 | 3.384216  | -1.092621 |
| H | -2.420438 | 3.737793  | -1.038016 |
| C | 0.656646  | -0.129211 | 0.062308  |
| H | 0.725624  | 0.955889  | 0.150505  |
| C | 1.759981  | -0.902956 | -0.019704 |
| H | 1.621029  | -1.988149 | -0.089650 |
| C | 3.156351  | -0.453635 | -0.025165 |
| C | 4.175093  | -1.416830 | -0.109525 |
| C | 3.522207  | 0.902114  | 0.053056  |
| C | 5.517020  | -1.042840 | -0.114390 |
| H | 3.907556  | -2.474776 | -0.172060 |
| C | 4.861836  | 1.275255  | 0.048166  |
| H | 2.754752  | 1.675486  | 0.118691  |
| C | 5.863995  | 0.305241  | -0.035401 |
| H | 6.294080  | -1.807149 | -0.179427 |
| H | 5.127957  | 2.332459  | 0.111300  |
| H | 6.914980  | 0.602284  | -0.038425 |

83

Figure S11-1\_PA-9d(Na)-prod(1,6major) / electronic energy: -3681.07040691 a.u. / lowest freq: 16.84 cm-1

|    |           |           |           |
|----|-----------|-----------|-----------|
| C  | 3.359716  | 2.192561  | 0.186378  |
| H  | 4.084937  | 2.045474  | -0.623987 |
| C  | 2.301682  | 3.253634  | -0.084287 |
| H  | 2.487627  | 4.197878  | 0.443917  |
| C  | 1.252797  | 1.255216  | 0.519749  |
| C  | -0.154011 | 3.268893  | 0.464251  |
| C  | -0.319177 | 4.494082  | -0.187628 |
| C  | -1.234976 | 2.721506  | 1.168563  |
| C  | -1.560009 | 5.142558  | -0.190544 |
| C  | -2.481791 | 3.342500  | 1.164703  |
| C  | -2.635440 | 4.552248  | 0.475124  |
| H  | -3.608401 | 5.051384  | 0.474548  |
| Cu | -0.121667 | -0.113799 | 0.916922  |
| N  | 2.533441  | 0.987727  | 0.317927  |
| N  | 1.081772  | 2.599858  | 0.407618  |
| C  | -0.564338 | -1.667253 | -0.868412 |
| C  | 0.339764  | -1.258115 | -1.914799 |
| Na | 3.394344  | -0.054629 | -3.260847 |
| H  | 2.204253  | 3.468661  | -1.162679 |
| H  | 3.895673  | 2.382327  | 1.131622  |
| H  | -0.320887 | -2.664768 | -0.488597 |
| C  | 0.330184  | 0.057031  | -2.510178 |
| C  | 1.379788  | -2.181028 | -2.311050 |
| O  | -0.739871 | 0.790831  | -2.142238 |
| O  | 1.175437  | 0.555265  | -3.250797 |
| O  | 2.232930  | -2.017594 | -3.178391 |
| O  | 1.379155  | -3.338978 | -1.604480 |
| C  | 2.407538  | -4.265605 | -1.896842 |
| H  | 2.351645  | -4.607837 | -2.940246 |
| H  | 2.254729  | -5.113124 | -1.218654 |
| H  | 3.399527  | -3.823111 | -1.723251 |
| C  | -0.815652 | 2.115161  | -2.630712 |
| H  | 0.107083  | 2.670519  | -2.414192 |
| H  | -1.657088 | 2.587839  | -2.110041 |
| H  | -0.986911 | 2.126332  | -3.717459 |
| C  | 3.068782  | -0.375270 | 0.295079  |
| H  | 2.466909  | -0.929703 | -0.436890 |
| C  | 2.913517  | -1.055084 | 1.632471  |
| C  | 3.331851  | -0.440029 | 2.819155  |
| C  | 2.353206  | -2.335772 | 1.700930  |
| C  | 3.189746  | -1.088835 | 4.045036  |
| H  | 3.762730  | 0.563840  | 2.785479  |
| C  | 2.209549  | -2.987696 | 2.926046  |
| H  | 2.009673  | -2.814301 | 0.779042  |
| C  | 2.626782  | -2.366278 | 4.102388  |
| H  | 3.519665  | -0.595379 | 4.962203  |
| H  | 1.758775  | -3.981983 | 2.962468  |
| H  | 2.509601  | -2.871378 | 5.063609  |
| C  | 4.523399  | -0.386753 | -0.259662 |
| H  | 4.841665  | -1.457743 | -0.141037 |
| H  | 5.143480  | 0.155563  | 0.512282  |
| O  | 4.619823  | 0.106165  | -1.502499 |
| C  | -1.673705 | -1.103385 | -0.279100 |
| H  | -2.108769 | -0.183596 | -0.678769 |
| C  | -2.533340 | -1.923593 | 0.669128  |
| H  | -1.995303 | -2.860483 | 0.883000  |
| C  | -3.870211 | -2.293151 | 0.052170  |
| C  | -4.201326 | -3.633394 | -0.170953 |
| C  | -4.792318 | -1.306787 | -0.322316 |

|   |           |           |           |
|---|-----------|-----------|-----------|
| C | -5.420834 | -3.983663 | -0.751757 |
| H | -3.491248 | -4.415155 | 0.111738  |
| C | -6.012090 | -1.651995 | -0.900811 |
| H | -4.555115 | -0.250350 | -0.169659 |
| C | -6.330977 | -2.993550 | -1.117888 |
| H | -5.658039 | -5.036680 | -0.919528 |
| H | -6.717437 | -0.868909 | -1.187771 |
| H | -7.285637 | -3.264252 | -1.574113 |
| C | -3.642936 | 2.709122  | 1.886248  |
| H | -3.302719 | 2.104875  | 2.739717  |
| H | -4.349242 | 3.464481  | 2.258237  |
| H | -4.204892 | 2.044533  | 1.209744  |
| C | -1.716402 | 6.449919  | -0.923143 |
| H | -2.717092 | 6.878335  | -0.776058 |
| H | -0.974363 | 7.186701  | -0.580138 |
| H | -1.561701 | 6.313378  | -2.004789 |
| H | 0.512466  | 4.951260  | -0.725950 |
| H | -1.094165 | 1.812936  | 1.754301  |
| C | -0.345908 | -0.525533 | 3.086856  |
| H | 0.549898  | -0.328070 | 3.656043  |
| C | -1.418580 | -0.828411 | 2.582812  |
| C | -2.721248 | -1.202714 | 2.022067  |
| H | -3.270254 | -1.835958 | 2.736222  |
| H | -3.314996 | -0.284862 | 1.882176  |

83

Figure S11-1\_PA-9d(Na)-ts(1,6major) / electronic energy: -3681.01674239 a.u. / lowest freq: -425.84 cm<sup>-1</sup>

|    |           |           |           |
|----|-----------|-----------|-----------|
| C  | 2.866803  | 2.675946  | 1.037241  |
| H  | 3.618483  | 3.073400  | 0.344267  |
| C  | 1.496643  | 3.345149  | 0.935558  |
| H  | 1.285729  | 4.038149  | 1.760640  |
| C  | 1.246966  | 1.039170  | 0.692392  |
| C  | -0.796962 | 2.290790  | 1.180897  |
| C  | -1.490484 | 3.438376  | 0.798338  |
| C  | -1.479557 | 1.247321  | 1.820637  |
| C  | -2.874586 | 3.531001  | 0.998245  |
| C  | -2.851518 | 1.327151  | 2.045160  |
| C  | -3.540848 | 2.470137  | 1.614215  |
| H  | -4.618525 | 2.543255  | 1.788127  |
| Cu | 0.443095  | -0.673683 | 0.087133  |
| N  | 2.545629  | 1.293601  | 0.660974  |
| N  | 0.593216  | 2.188102  | 0.972750  |
| C  | -0.520351 | -1.415746 | -1.646627 |
| C  | 0.525645  | -0.530428 | -2.098307 |
| Na | 3.541048  | 1.559954  | -2.683597 |
| H  | 1.377226  | 3.887276  | -0.017588 |
| H  | 3.266719  | 2.708454  | 2.064537  |
| H  | -0.293059 | -2.477742 | -1.765329 |
| C  | 0.359803  | 0.903986  | -2.362672 |
| C  | 1.798868  | -1.136899 | -2.511518 |
| O  | -0.906702 | 1.322018  | -2.270671 |
| O  | 1.249489  | 1.695745  | -2.636288 |
| O  | 2.729106  | -0.577606 | -3.070754 |
| O  | 1.883062  | -2.439152 | -2.201216 |
| C  | 3.067140  | -3.118499 | -2.585350 |
| H  | 3.157940  | -3.161586 | -3.680079 |
| H  | 2.981622  | -4.130150 | -2.174801 |
| H  | 3.957585  | -2.618517 | -2.178973 |
| C  | -1.154302 | 2.696016  | -2.515703 |
| H  | -0.506982 | 3.328730  | -1.895213 |
| H  | -2.204989 | 2.866151  | -2.256610 |
| H  | -0.981270 | 2.936927  | -3.574367 |
| C  | 3.541140  | 0.255101  | 0.406446  |
| H  | 3.238270  | -0.254293 | -0.521579 |
| C  | 3.569791  | -0.776710 | 1.510104  |
| C  | 3.338648  | -0.440898 | 2.848798  |
| C  | 3.833792  | -2.114224 | 1.194831  |
| C  | 3.358980  | -1.418274 | 3.843111  |
| H  | 3.114557  | 0.593821  | 3.117691  |
| C  | 3.857616  | -3.094769 | 2.184782  |
| H  | 4.001163  | -2.392857 | 0.151635  |
| C  | 3.616254  | -2.750116 | 3.514915  |
| H  | 3.167032  | -1.139253 | 4.881685  |
| H  | 4.052018  | -4.135263 | 1.915236  |
| H  | 3.623372  | -3.516908 | 4.292376  |
| C  | 4.920609  | 0.898773  | 0.075156  |
| H  | 5.615125  | 0.019787  | -0.011122 |
| H  | 5.252989  | 1.400160  | 1.029742  |
| O  | 4.871332  | 1.700685  | -0.997615 |
| C  | -1.825621 | -1.113976 | -1.224459 |
| H  | -2.112915 | -0.072661 | -1.093273 |
| C  | -2.736375 | -2.126181 | -0.917369 |
| H  | -2.504266 | -3.121690 | -1.302082 |
| C  | -4.180716 | -1.862138 | -0.728250 |
| C  | -5.091188 | -2.927133 | -0.811338 |
| C  | -4.686171 | -0.577836 | -0.471120 |
| C  | -6.457825 | -2.720791 | -0.638977 |
| H  | -4.716894 | -3.934837 | -1.011349 |
| C  | -6.052175 | -0.370517 | -0.297835 |
| H  | -4.007551 | 0.273745  | -0.389597 |

|   |           |           |           |
|---|-----------|-----------|-----------|
| C | -6.945620 | -1.439678 | -0.379347 |
| H | -7.147072 | -3.565407 | -0.707643 |
| H | -6.421400 | 0.637572  | -0.095148 |
| H | -8.016271 | -1.274778 | -0.241455 |
| C | -3.571403 | 0.223601  | 2.775210  |
| H | -2.873392 | -0.563606 | 3.091738  |
| H | -4.079472 | 0.612349  | 3.670806  |
| H | -4.340469 | -0.236372 | 2.136249  |
| C | -3.621699 | 4.751481  | 0.526618  |
| H | -4.614503 | 4.821204  | 0.991853  |
| H | -3.067914 | 5.673798  | 0.755415  |
| H | -3.766496 | 4.721037  | -0.565435 |
| H | -0.962707 | 4.269764  | 0.326130  |
| H | -0.924754 | 0.375016  | 2.167759  |
| C | 0.058354  | -2.071084 | 1.498789  |
| H | 0.887162  | -2.110107 | 2.209329  |
| C | -1.081011 | -2.617436 | 1.438593  |
| C | -2.349736 | -2.995465 | 1.131882  |
| H | -2.536143 | -4.018874 | 0.794614  |
| H | -3.176879 | -2.515024 | 1.662542  |

83

Figure S11-1\_PA-9d(Na)-pc(1,6major) / electronic energy: -3681.03006649 a.u. / lowest freq: 18.39 cm<sup>-1</sup>

|    |           |           |           |
|----|-----------|-----------|-----------|
| C  | -3.023393 | 1.926663  | -1.975684 |
| H  | -3.734352 | 2.631185  | -1.527316 |
| C  | -1.644732 | 2.532563  | -2.247739 |
| H  | -1.460479 | 2.735628  | -3.310896 |
| C  | -1.402412 | 0.617317  | -0.940675 |
| C  | 0.652603  | 1.501882  | -1.882637 |
| C  | 1.359014  | 2.709201  | -1.868560 |
| C  | 1.339277  | 0.294672  | -2.012511 |
| C  | 2.754866  | 2.706409  | -1.925556 |
| C  | 2.736594  | 0.269001  | -2.064975 |
| C  | 3.429058  | 1.480180  | -2.007548 |
| H  | 4.522556  | 1.472153  | -2.038805 |
| Cu | -0.443186 | -0.653845 | 0.252837  |
| N  | -2.699485 | 0.874906  | -1.002373 |
| N  | -0.752993 | 1.482267  | -1.747403 |
| C  | 0.760117  | -0.627317 | 1.919256  |
| C  | -0.135673 | 0.472048  | 1.979585  |
| Na | -2.935225 | 2.839754  | 1.562535  |
| H  | -1.490409 | 3.465715  | -1.680749 |
| H  | -3.469084 | 1.485925  | -2.882489 |
| H  | 0.498041  | -1.513492 | 2.501012  |
| C  | 0.207989  | 1.890904  | 1.671427  |
| C  | -1.433009 | 0.294213  | 2.680471  |
| O  | 1.493583  | 2.169302  | 1.832244  |
| O  | -0.595730 | 2.739101  | 1.334695  |
| O  | -2.173521 | 1.191039  | 3.035081  |
| O  | -1.735423 | -0.985506 | 2.885773  |
| C  | -2.968272 | -1.264192 | 3.539023  |
| H  | -2.954150 | -0.882689 | 4.569069  |
| H  | -3.070482 | -2.353768 | 3.537429  |
| H  | -3.805816 | -0.801485 | 2.998386  |
| C  | 1.914143  | 3.504478  | 1.577594  |
| H  | 1.653824  | 3.801238  | 0.554086  |
| H  | 3.001317  | 3.507010  | 1.706997  |
| H  | 1.445484  | 4.196091  | 2.290993  |
| C  | -3.700064 | 0.104960  | -0.274107 |
| H  | -3.278032 | -0.077292 | 0.727101  |
| C  | -3.981229 | -1.240056 | -0.906391 |
| C  | -3.683604 | -1.525988 | -2.242664 |
| C  | -4.571875 | -2.243679 | -0.127525 |
| C  | -3.970192 | -2.778103 | -2.787385 |
| H  | -3.199125 | -0.773480 | -2.867716 |
| C  | -4.859570 | -3.495455 | -0.667201 |
| H  | -4.794098 | -2.045174 | 0.924454  |
| C  | -4.560659 | -3.767787 | -2.002909 |
| H  | -3.725232 | -2.981151 | -3.832436 |
| H  | -5.311379 | -4.266157 | -0.038477 |
| H  | -4.778748 | -4.749920 | -2.427927 |
| C  | -4.966335 | 0.987140  | -0.041987 |
| H  | -5.669686 | 0.316865  | 0.520821  |
| H  | -5.450089 | 1.080375  | -1.056977 |
| O  | -4.682120 | 2.151527  | 0.554778  |
| C  | 2.115488  | -0.564051 | 1.404286  |
| H  | 2.390812  | 0.312596  | 0.816910  |
| C  | 3.021022  | -1.546790 | 1.581871  |
| H  | 2.733256  | -2.447012 | 2.132268  |
| C  | 4.396575  | -1.501236 | 1.064643  |
| C  | 5.099492  | -2.697931 | 0.854882  |
| C  | 5.033063  | -0.289850 | 0.747261  |
| C  | 6.380136  | -2.688708 | 0.307980  |
| H  | 4.618139  | -3.647511 | 1.100718  |
| C  | 6.315497  | -0.279590 | 0.206101  |
| H  | 4.521311  | 0.657534  | 0.929358  |
| C  | 6.991629  | -1.478918 | -0.024015 |
| H  | 6.903693  | -3.632149 | 0.138402  |
| H  | 6.793165  | 0.672861  | -0.034727 |
| H  | 7.995958  | -1.470087 | -0.452964 |

|   |           |           |           |
|---|-----------|-----------|-----------|
| C | 3.446063  | -1.050686 | -2.204236 |
| H | 3.261668  | -1.486079 | -3.199144 |
| H | 4.530878  | -0.945210 | -2.068617 |
| H | 3.074793  | -1.767014 | -1.456599 |
| C | 3.532102  | 3.996742  | -1.888974 |
| H | 4.034947  | 4.178828  | -2.851532 |
| H | 2.881034  | 4.857467  | -1.681796 |
| H | 4.313956  | 3.964250  | -1.115311 |
| H | 0.822078  | 3.656540  | -1.786138 |
| H | 0.780604  | -0.641757 | -2.065925 |
| C | -0.303029 | -2.519919 | -0.382309 |
| H | -1.202178 | -2.890478 | -0.900205 |
| C | 0.724707  | -3.306767 | -0.288710 |
| C | 1.813396  | -4.049150 | -0.162957 |
| H | 1.955701  | -4.710844 | 0.698034  |
| H | 2.600336  | -4.042421 | -0.924324 |

51

Figure S11-1\_9d(Na)-Cu-allenyl / electronic energy: -2839.06020575 a.u. / lowest freq: 14.37 cm<sup>-1</sup>

|    |           |           |           |
|----|-----------|-----------|-----------|
| C  | 1.401449  | -2.075087 | 0.781893  |
| H  | 1.679476  | -1.881296 | 1.831858  |
| C  | -0.006213 | -2.648365 | 0.652932  |
| H  | -0.062301 | -3.424044 | -0.128912 |
| C  | 0.006182  | -0.440008 | -0.139162 |
| C  | -2.189160 | -1.531257 | 0.133738  |
| C  | -2.845361 | -2.761728 | 0.235329  |
| C  | -2.951250 | -0.369985 | -0.075492 |
| C  | -4.240763 | -2.845245 | 0.119017  |
| C  | -4.334525 | -0.435941 | -0.206321 |
| C  | -4.972785 | -1.681355 | -0.104919 |
| H  | -6.061043 | -1.738645 | -0.201130 |
| Cu | -0.329372 | 1.490047  | -0.372686 |
| N  | 1.273764  | -0.812875 | 0.054580  |
| N  | -0.787308 | -1.470553 | 0.258845  |
| Na | 0.498306  | 3.958728  | 1.355621  |
| H  | -0.381218 | -3.078008 | 1.591814  |
| H  | 2.168593  | -2.723176 | 0.339289  |
| C  | 2.372398  | 0.146754  | -0.035438 |
| H  | 2.178954  | 0.736216  | -0.947149 |
| C  | 3.689483  | -0.579021 | -0.225630 |
| C  | 4.620192  | -0.739015 | 0.805951  |
| C  | 3.975802  | -1.139609 | -1.477409 |
| C  | 5.810682  | -1.435686 | 0.589342  |
| H  | 4.421442  | -0.318405 | 1.793568  |
| C  | 5.159152  | -1.840488 | -1.696033 |
| H  | 3.252345  | -1.025120 | -2.289480 |
| C  | 6.083241  | -1.989386 | -0.660216 |
| H  | 6.529017  | -1.546552 | 1.404836  |
| H  | 5.363247  | -2.270600 | -2.679186 |
| H  | 7.015148  | -2.533630 | -0.828612 |
| C  | 2.308388  | 1.165951  | 1.128058  |
| H  | 3.266929  | 1.737018  | 1.072498  |
| H  | 2.373701  | 0.583431  | 2.082237  |
| O  | 1.207712  | 1.962082  | 1.066314  |
| C  | -5.135842 | 0.816899  | -0.451875 |
| H  | -5.658483 | 0.763844  | -1.419613 |
| H  | -5.904556 | 0.954837  | 0.324125  |
| H  | -4.492476 | 1.707881  | -0.461773 |
| C  | -4.919272 | -4.186120 | 0.236349  |
| H  | -6.004229 | -4.101088 | 0.086278  |
| H  | -4.527345 | -4.895642 | -0.508698 |
| H  | -4.747592 | -4.631017 | 1.228910  |
| H  | -2.283360 | -3.682514 | 0.397907  |
| H  | -2.449009 | 0.596199  | -0.147487 |
| C  | -1.307163 | 3.029167  | -1.145241 |
| H  | -1.961130 | 2.829821  | -2.012024 |
| C  | -1.311845 | 4.265224  | -0.742674 |
| C  | -1.248636 | 5.503922  | -0.256051 |
| H  | -0.536999 | 6.236564  | -0.653695 |
| H  | -1.960491 | 5.856163  | 0.499142  |

83

Figure S11-1\_PA-9d(Na)-pc(1,4AA) / electronic energy: -3681.02869646 a.u. / lowest freq: 15.32 cm<sup>-1</sup>

|    |           |           |           |
|----|-----------|-----------|-----------|
| C  | -3.253675 | -2.256189 | -0.102901 |
| H  | -3.622490 | -2.800857 | 0.775342  |
| C  | -3.924662 | -0.896147 | -0.279506 |
| H  | -4.629595 | -0.870074 | -1.121358 |
| C  | -1.602447 | -0.620466 | -0.214017 |
| C  | -2.941598 | 1.319361  | -0.932102 |
| C  | -4.180292 | 1.952469  | -0.772779 |
| C  | -1.889254 | 2.019258  | -1.534109 |
| C  | -4.366578 | 3.274307  | -1.192997 |
| C  | -2.047934 | 3.346158  | -1.931960 |
| C  | -3.293322 | 3.961795  | -1.765025 |
| H  | -3.431417 | 4.996098  | -2.092936 |
| Cu | 0.207426  | 0.221923  | -0.208507 |
| N  | -1.849404 | -1.887602 | 0.067032  |
| N  | -2.778499 | -0.016761 | -0.525315 |
| C  | 1.492357  | 1.536151  | 0.668178  |
| C  | 0.519056  | 1.125969  | 1.614522  |
| Na | -1.957112 | -0.490652 | 3.597226  |

|   |           |           |           |
|---|-----------|-----------|-----------|
| H | -4.460065 | -0.581208 | 0.631309  |
| H | -3.368025 | -2.900511 | -0.988751 |
| H | 1.254172  | 2.467102  | 0.143064  |
| C | -0.693885 | 1.948848  | 1.862885  |
| C | 0.789422  | 0.079983  | 2.643411  |
| O | -0.630067 | 3.153591  | 1.311632  |
| O | -1.669469 | 1.574208  | 2.487450  |
| O | 0.379406  | 0.127681  | 3.783425  |
| O | 1.539574  | -0.915403 | 2.190403  |
| C | 1.745042  | -2.014806 | 3.081898  |
| H | 2.313477  | -1.690709 | 3.964565  |
| H | 2.318535  | -2.752722 | 2.511186  |
| H | 0.756053  | -2.404319 | 3.369559  |
| C | -1.784267 | 3.977586  | 1.427102  |
| H | -2.662187 | 3.473487  | 1.001760  |
| H | -1.563854 | 4.888360  | 0.861291  |
| H | -1.974606 | 4.220562  | 2.481615  |
| C | -0.849214 | -2.848597 | 0.519073  |
| H | 0.075780  | -2.263686 | 0.617570  |
| C | -0.617591 | -3.932827 | -0.515130 |
| C | -1.501218 | -5.009119 | -0.672308 |
| C | 0.504424  | -3.866382 | -1.350600 |
| C | -1.273342 | -5.986223 | -1.641659 |
| H | -2.381261 | -5.091992 | -0.030768 |
| C | 0.736730  | -4.842004 | -2.319116 |
| H | 1.192650  | -3.022658 | -1.251958 |
| C | -0.153740 | -5.905829 | -2.468922 |
| H | -1.976492 | -6.815379 | -1.749692 |
| H | 1.616219  | -4.767934 | -2.963023 |
| H | 0.024739  | -6.670225 | -3.228698 |
| C | -1.199661 | -3.360406 | 1.943797  |
| H | -0.348980 | -4.054446 | 2.190507  |
| H | -2.078042 | -4.053606 | 1.843785  |
| O | -1.387513 | -2.364115 | 2.820548  |
| C | 2.895953  | 1.146976  | 0.610706  |
| H | 3.208429  | 0.290992  | 1.209613  |
| C | 3.775879  | 1.797381  | -0.173885 |
| H | 3.412508  | 2.647522  | -0.762556 |
| C | 5.204643  | 1.491508  | -0.331964 |
| C | 5.994449  | 2.333476  | -1.131668 |
| C | 5.823841  | 0.387330  | 0.280511  |
| C | 7.354179  | 2.088289  | -1.312113 |
| H | 5.530656  | 3.195500  | -1.618351 |
| C | 7.181225  | 0.142145  | 0.100829  |
| H | 5.238617  | -0.294001 | 0.901229  |
| C | 7.953768  | 0.990977  | -0.695557 |
| H | 7.948230  | 2.757085  | -1.938787 |
| H | 7.641873  | -0.722525 | 0.583698  |
| H | 9.018811  | 0.794814  | -0.836230 |
| C | -0.878554 | 4.098647  | -2.509404 |
| H | -1.200977 | 4.849606  | -3.244284 |
| H | -0.335889 | 4.629258  | -1.709633 |
| H | -0.164325 | 3.417646  | -2.993484 |
| C | -5.696968 | 3.951942  | -0.989234 |
| H | -6.526540 | 3.232613  | -1.040543 |
| H | -5.740494 | 4.434342  | 0.000677  |
| H | -5.868421 | 4.732855  | -1.743333 |
| H | -0.941747 | 1.514850  | -1.732363 |
| H | -5.018791 | 1.422052  | -0.318795 |
| C | 1.146118  | -0.088268 | -1.916732 |
| H | 2.200628  | 0.192315  | -2.062009 |
| C | 0.509184  | -0.674153 | -2.890053 |
| C | -0.207543 | -1.276342 | -3.822618 |
| H | -0.782271 | -0.703189 | -4.557630 |
| H | -0.245324 | -2.369575 | -3.883371 |

83

Figure S11-1\_PA-9d(Na)-ts(1,4AA) / electronic energy: -3681.00195136 a.u. / lowest freq: -312.43 cm<sup>-1</sup>

|    |           |           |           |
|----|-----------|-----------|-----------|
| C  | 4.176048  | 1.135057  | -0.090047 |
| H  | 4.668575  | 1.567707  | 0.789996  |
| C  | 4.335759  | -0.384746 | -0.166833 |
| H  | 5.014900  | -0.708775 | -0.967121 |
| C  | 2.064657  | 0.167229  | -0.232720 |
| C  | 2.643444  | -2.173764 | -0.699438 |
| C  | 3.544523  | -3.186939 | -0.344149 |
| C  | 1.446529  | -2.515264 | -1.337083 |
| C  | 3.250300  | -4.527365 | -0.604390 |
| C  | 1.122649  | -3.852780 | -1.579408 |
| C  | 2.033878  | -4.847078 | -1.216798 |
| H  | 1.793140  | -5.895798 | -1.413924 |
| Cu | 0.127370  | 0.018715  | -0.177629 |
| N  | 2.725908  | 1.287904  | -0.001289 |
| N  | 2.963388  | -0.828840 | -0.431824 |
| C  | -1.866795 | -0.581305 | 0.180416  |
| C  | -1.089312 | -0.541418 | 1.435416  |
| Na | 1.478134  | 0.211717  | 3.617748  |
| H  | 4.698384  | -0.803351 | 0.785745  |
| H  | 4.554428  | 1.650803  | -0.987156 |
| H  | -1.888642 | -1.587476 | -0.247600 |
| C  | -0.397907 | -1.723976 | 1.932641  |

|   |           |           |           |
|---|-----------|-----------|-----------|
| C | -1.064010 | 0.656235  | 2.274045  |
| O | -0.685861 | -2.842420 | 1.246485  |
| O | 0.401521  | -1.755272 | 2.861065  |
| O | -0.828941 | 0.703778  | 3.468843  |
| O | -1.299770 | 1.781016  | 1.569809  |
| C | -1.104679 | 3.009807  | 2.262795  |
| H | -1.844006 | 3.127387  | 3.067723  |
| H | -1.236737 | 3.798951  | 1.513998  |
| H | -0.085887 | 3.026249  | 2.677885  |
| C | 0.059139  | -4.000970 | 1.583714  |
| H | 1.133725  | -3.835718 | 1.417594  |
| H | -0.296323 | -4.796055 | 0.919495  |
| H | -0.107500 | -4.281912 | 2.632877  |
| C | 2.103661  | 2.556889  | 0.352052  |
| H | 1.023242  | 2.345492  | 0.357132  |
| C | 2.375168  | 3.586907  | -0.729865 |
| C | 3.311495  | 4.614811  | -0.581722 |
| C | 1.676418  | 3.486906  | -1.941176 |
| C | 3.541375  | 5.522835  | -1.617767 |
| H | 3.869590  | 4.714526  | 0.351081  |
| C | 1.904597  | 4.388731  | -2.977487 |
| H | 0.942192  | 2.684943  | -2.067725 |
| C | 2.841276  | 5.412216  | -2.817512 |
| H | 4.275881  | 6.320585  | -1.484755 |
| H | 1.349741  | 4.294706  | -3.913792 |
| H | 3.022317  | 6.123326  | -3.626722 |
| C | 2.455835  | 2.944766  | 1.810831  |
| H | 1.953962  | 3.942442  | 1.953146  |
| H | 3.551948  | 3.196415  | 1.835726  |
| O | 2.094166  | 1.997594  | 2.686340  |
| C | -3.203807 | 0.059755  | 0.164916  |
| H | -3.278547 | 1.040241  | 0.637294  |
| C | -4.281056 | -0.541545 | -0.359020 |
| H | -4.148244 | -1.515496 | -0.844679 |
| C | -5.657818 | -0.018647 | -0.366931 |
| C | -6.652409 | -0.732963 | -1.053163 |
| C | -6.027185 | 1.171610  | 0.283616  |
| C | -7.967860 | -0.273746 | -1.099173 |
| H | -6.386374 | -1.663441 | -1.561684 |
| C | -7.339715 | 1.630630  | 0.238760  |
| H | -5.282839 | 1.747047  | 0.837675  |
| C | -8.316841 | 0.911361  | -0.453618 |
| H | -8.723390 | -0.846080 | -1.641999 |
| H | -7.604446 | 2.558116  | 0.751398  |
| H | -9.346252 | 1.274762  | -0.486863 |
| C | -0.209941 | -4.201181 | -2.185788 |
| H | -0.197991 | -5.196898 | -2.650118 |
| H | -0.990109 | -4.201373 | -1.406591 |
| H | -0.513240 | -3.460450 | -2.938859 |
| C | 4.219149  | -5.616960 | -0.224173 |
| H | 5.125778  | -5.208692 | 0.242800  |
| H | 3.759590  | -6.322683 | 0.484733  |
| H | 4.523249  | -6.197974 | -1.108367 |
| H | 0.762446  | -1.734344 | -1.674625 |
| H | 4.487844  | -2.938890 | 0.144431  |
| C | -1.289662 | 0.402614  | -1.553822 |
| H | -1.610777 | 1.450677  | -1.515066 |
| C | -1.368143 | -0.275693 | -2.663607 |
| C | -1.464388 | -1.021506 | -3.742501 |
| H | -2.392965 | -1.552914 | -3.977516 |
| H | -0.630084 | -1.121775 | -4.444135 |

83

Figure S11-1\_PA-9d(Na)-prod(1,4AA) / electronic energy: -3681.06975124 a.u. / lowest freq: 13.19 cm<sup>-1</sup>

|    |           |           |           |
|----|-----------|-----------|-----------|
| C  | 4.490641  | 1.254330  | 0.027949  |
| H  | 5.055997  | 1.040248  | -0.891707 |
| C  | 3.685722  | 2.555452  | -0.076348 |
| H  | 3.939082  | 3.282006  | 0.710202  |
| C  | 2.207631  | 0.746738  | 0.202315  |
| C  | 1.216752  | 2.989147  | 0.146705  |
| C  | 1.326232  | 4.263172  | -0.424746 |
| C  | 0.038377  | 2.631093  | 0.808972  |
| C  | 0.265305  | 5.170439  | -0.351512 |
| C  | -1.032758 | 3.521834  | 0.886965  |
| C  | -0.907869 | 4.787257  | 0.305207  |
| H  | -1.740930 | 5.493988  | 0.368282  |
| Cu | 0.805760  | -0.494609 | -0.391620 |
| N  | 3.444105  | 0.250631  | 0.229341  |
| N  | 2.302099  | 2.092295  | 0.080430  |
| C  | -1.941841 | -0.711521 | 0.689351  |
| C  | -1.236603 | -0.961158 | -0.657302 |
| Na | 0.715485  | -1.499175 | -3.409062 |
| H  | 3.829888  | 3.045487  | -1.050422 |
| H  | 5.202150  | 1.253495  | 0.866092  |
| H  | -1.977997 | 0.375248  | 0.815879  |
| C  | -1.352862 | 0.079903  | -1.674284 |
| C  | -1.110437 | -2.327161 | -1.149150 |
| O  | -2.026564 | 1.168928  | -1.258614 |
| O  | -0.889178 | 0.055076  | -2.815011 |
| O  | -0.855511 | -2.704822 | -2.288156 |

|   |           |           |           |
|---|-----------|-----------|-----------|
| O | -1.312433 | -3.248898 | -0.180538 |
| C | -1.137419 | -4.606803 | -0.536226 |
| H | -1.843765 | -4.908399 | -1.322669 |
| H | -1.326632 | -5.185711 | 0.375087  |
| H | -0.113166 | -4.792985 | -0.890167 |
| C | -1.987847 | 2.307552  | -2.096483 |
| H | -0.959307 | 2.690067  | -2.188648 |
| H | -2.611151 | 3.066409  | -1.610009 |
| H | -2.381889 | 2.081755  | -3.096996 |
| C | 3.695375  | -1.183479 | 0.091846  |
| H | 2.952462  | -1.680598 | 0.737317  |
| C | 5.072861  | -1.530989 | 0.619443  |
| C | 6.179727  | -1.692078 | -0.221038 |
| C | 5.257932  | -1.663071 | 2.001585  |
| C | 7.439354  | -1.978546 | 0.307471  |
| H | 6.065121  | -1.589406 | -1.301884 |
| C | 6.514142  | -1.945647 | 2.533531  |
| H | 4.400296  | -1.539103 | 2.668694  |
| C | 7.611007  | -2.104217 | 1.684958  |
| H | 8.291872  | -2.101974 | -0.364271 |
| H | 6.638258  | -2.046819 | 3.614002  |
| H | 8.597244  | -2.326045 | 2.098615  |
| C | 3.376338  | -1.657525 | -1.348056 |
| H | 3.742450  | -2.710853 | -1.399373 |
| H | 4.044334  | -1.082424 | -2.037669 |
| O | 2.058367  | -1.536812 | -1.669817 |
| C | -3.365934 | -1.211468 | 0.685256  |
| H | -3.487633 | -2.293967 | 0.573657  |
| C | -4.434629 | -0.409741 | 0.775847  |
| H | -4.262397 | 0.666404  | 0.890795  |
| C | -5.853214 | -0.812789 | 0.733738  |
| C | -6.844452 | 0.167281  | 0.899258  |
| C | -6.268667 | -2.140067 | 0.528768  |
| C | -8.199261 | -0.160294 | 0.865054  |
| H | -6.544017 | 1.206624  | 1.057745  |
| C | -7.620378 | -2.469395 | 0.494766  |
| H | -5.525881 | -2.928332 | 0.389443  |
| C | -8.593977 | -1.481880 | 0.662529  |
| H | -8.950289 | 0.622281  | 0.995830  |
| H | -7.917821 | -3.508047 | 0.332587  |
| H | -9.654278 | -1.742397 | 0.632512  |
| C | -2.313420 | 3.103647  | 1.558850  |
| H | -2.826798 | 3.958087  | 2.022310  |
| H | -2.999170 | 2.661740  | 0.817737  |
| H | -2.131127 | 2.341128  | 2.329539  |
| C | 0.379927  | 6.541029  | -0.968645 |
| H | 1.354144  | 6.686668  | -1.455306 |
| H | -0.404405 | 6.699730  | -1.724737 |
| H | 0.259648  | 7.327280  | -0.207389 |
| H | -0.035895 | 1.646817  | 1.268917  |
| C | 2.241669  | 4.561274  | -0.938354 |
| C | -1.175701 | -1.263085 | 1.882862  |
| H | -1.018908 | -2.345021 | 1.927080  |
| C | -0.702838 | -0.507137 | 2.842038  |
| C | -0.207304 | 0.270045  | 3.773146  |
| H | -0.778149 | 0.525503  | 4.671887  |
| H | 0.799267  | 0.690970  | 3.673043  |

15

Figure S12-1\_NaOtBu / electronic energy: -395.117378571 a.u. / lowest freq: 32.67 cm<sup>-1</sup>

|    |           |           |           |
|----|-----------|-----------|-----------|
| O  | -0.737133 | -0.009141 | 0.003654  |
| C  | 0.624960  | -0.000675 | -0.000009 |
| C  | 1.181519  | -1.414753 | -0.289909 |
| H  | 2.284457  | -1.455957 | -0.304558 |
| H  | 0.819613  | -2.118024 | 0.477986  |
| H  | 0.809650  | -1.764308 | -1.267141 |
| C  | 1.175601  | 0.461725  | 1.370139  |
| H  | 2.278378  | 0.484748  | 1.411897  |
| H  | 0.800290  | 1.473434  | 1.596181  |
| H  | 0.814389  | -0.215472 | 2.161532  |
| C  | 1.165629  | 0.961801  | -1.084173 |
| H  | 0.789122  | 1.980374  | -0.894033 |
| H  | 2.268079  | 1.001909  | -1.121930 |
| H  | 0.797342  | 0.647083  | -2.074606 |
| Na | -2.786410 | -0.000841 | 0.000833  |

32

Figure S12-1\_dienoate / electronic energy: -841.927078481 a.u. / lowest freq: 24.55 cm<sup>-1</sup>

|   |           |           |           |
|---|-----------|-----------|-----------|
| C | -0.660544 | -0.726572 | 0.059153  |
| C | -1.860539 | -0.097447 | 0.115996  |
| H | -0.691600 | -1.818492 | -0.004770 |
| C | -1.976243 | 1.390665  | 0.160143  |
| C | -3.120576 | -0.891785 | 0.187355  |
| O | -3.041424 | 1.823605  | -0.507466 |
| O | -1.182749 | 2.134043  | 0.689285  |
| O | -4.147702 | -0.497504 | 0.683440  |
| O | -2.981802 | -2.118850 | -0.320932 |
| C | -4.097604 | -2.989729 | -0.195724 |
| H | -4.332384 | -3.170881 | 0.862818  |
| H | -3.810049 | -3.927003 | -0.683244 |
| H | -4.981752 | -2.562067 | -0.688186 |



|   |           |           |           |
|---|-----------|-----------|-----------|
| C | -3.254671 | 3.228152  | -0.535442 |
| H | -3.354009 | 3.627502  | 0.483524  |
| H | -4.184056 | 3.384216  | -1.092621 |
| H | -2.420438 | 3.737793  | -1.038016 |
| C | 0.656646  | -0.129211 | 0.062308  |
| H | 0.725624  | 0.955889  | 0.150505  |
| C | 1.759981  | -0.902956 | -0.019704 |
| H | 1.621029  | -1.988149 | -0.089650 |
| C | 3.156351  | -0.453635 | -0.025165 |
| C | 4.175093  | -1.416830 | -0.109525 |
| C | 3.522207  | 0.902114  | 0.053056  |
| C | 5.517020  | -1.042840 | -0.114390 |
| H | 3.907556  | -2.474776 | -0.172060 |
| C | 4.861836  | 1.275255  | 0.048166  |
| H | 2.754752  | 1.675486  | 0.118691  |
| C | 5.863995  | 0.305241  | -0.035401 |
| H | 6.294080  | -1.807149 | -0.179427 |
| H | 5.127957  | 2.332459  | 0.111300  |
| H | 6.914980  | 0.602284  | -0.038425 |

103

Figure S12-1\_PA-SIMes(NaOtBu)-prod(1,4) / electronic energy: -3917.95611486 a.u. / lowest freq: 10.44 cm<sup>-1</sup>

|    |           |           |           |
|----|-----------|-----------|-----------|
| Cu | -2.225107 | -0.135198 | 0.570753  |
| C  | 3.652191  | -0.029908 | -0.596619 |
| C  | 3.055741  | 0.177758  | 0.789288  |
| H  | 3.728154  | 0.963511  | -1.053669 |
| C  | 2.839153  | -0.912542 | 1.676247  |
| C  | 2.580450  | 1.474033  | 1.153906  |
| O  | 3.318599  | -2.098807 | 1.193129  |
| O  | 2.292124  | -0.913949 | 2.787632  |
| O  | 1.869296  | 1.787836  | 2.118429  |
| O  | 2.973878  | 2.460368  | 0.301812  |
| C  | 2.465524  | 3.750978  | 0.549425  |
| H  | 1.366359  | 3.751948  | 0.563652  |
| H  | 2.822544  | 4.387183  | -0.270274 |
| H  | 2.826021  | 4.152773  | 1.508857  |
| C  | 3.213204  | -3.229140 | 2.030255  |
| H  | 3.695764  | -3.057381 | 3.003689  |
| H  | 3.721572  | -4.048014 | 1.506026  |
| H  | 2.163207  | -3.504457 | 2.206132  |
| C  | 5.039346  | -0.619153 | -0.609459 |
| H  | 5.139293  | -1.616333 | -0.171670 |
| C  | 6.108421  | 0.013242  | -1.111242 |
| H  | 5.969640  | 1.019710  | -1.525316 |
| C  | 7.494098  | -0.493108 | -1.164028 |
| C  | 8.516255  | 0.362770  | -1.604228 |
| C  | 7.847417  | -1.804235 | -0.799813 |
| C  | 9.840940  | -0.066685 | -1.673790 |
| H  | 8.265059  | 1.386836  | -1.893968 |
| C  | 9.169064  | -2.235474 | -0.869280 |
| H  | 7.077901  | -2.501662 | -0.462317 |
| C  | 10.174122 | -1.369483 | -1.306445 |
| H  | 10.616077 | 0.621850  | -2.018218 |
| H  | 9.417124  | -3.260493 | -0.583602 |
| H  | 11.209972 | -1.711455 | -1.362657 |
| C  | 0.314058  | 0.336010  | -1.655711 |
| H  | -0.633116 | 0.841361  | -1.678126 |
| C  | 1.384131  | -0.229794 | -1.611176 |
| C  | 2.701245  | -0.856238 | -1.509156 |
| H  | 3.139779  | -0.955978 | -2.515999 |
| H  | 2.590163  | -1.872338 | -1.099775 |
| Na | 0.327265  | 0.259574  | 2.757118  |
| O  | -1.301942 | -1.005582 | 1.911558  |
| C  | -1.190680 | -2.404905 | 1.879330  |
| C  | -0.333153 | -2.827293 | 0.676119  |
| H  | -0.174955 | -3.917462 | 0.638594  |
| H  | -0.823810 | -2.518627 | -0.261745 |
| H  | 0.648213  | -2.331116 | 0.716829  |
| C  | -2.579882 | -3.049728 | 1.764677  |
| H  | -2.525709 | -4.150438 | 1.780933  |
| H  | -3.219701 | -2.720449 | 2.599038  |
| H  | -3.066096 | -2.749259 | 0.823167  |
| C  | -0.522284 | -2.864508 | 3.182679  |
| H  | -0.413888 | -3.960272 | 3.223437  |
| H  | 0.479315  | -2.417653 | 3.275194  |
| H  | -1.129777 | -2.548072 | 4.045802  |
| C  | -5.037276 | 0.924323  | -2.312495 |
| H  | -6.120342 | 0.801615  | -2.177000 |
| C  | -4.539638 | 2.322738  | -1.927516 |
| H  | -4.229046 | 2.919030  | -2.795536 |
| C  | -3.338813 | 0.723720  | -0.711356 |
| C  | -2.602047 | 3.041466  | -0.461467 |
| C  | -1.656318 | 3.713404  | -1.249236 |
| C  | -2.798881 | 3.374397  | 0.892751  |
| C  | -0.892392 | 4.721058  | -0.651218 |
| C  | -2.001082 | 4.374673  | 1.447031  |
| C  | -1.042626 | 5.061065  | 0.692914  |
| N  | -4.290347 | 0.068719  | -1.383391 |
| N  | -3.397705 | 2.017702  | -1.053953 |
| H  | -5.290652 | 2.900783  | -1.365442 |

|   |           |           |           |
|---|-----------|-----------|-----------|
| H | -4.792844 | 0.659449  | -3.353474 |
| H | -2.138149 | 4.634640  | 2.500620  |
| H | -0.145852 | 5.242823  | -1.256470 |
| C | -1.462252 | 3.387082  | -2.706746 |
| H | -1.769192 | 2.358790  | -2.942610 |
| H | -2.059403 | 4.060896  | -3.342419 |
| H | -0.409792 | 3.508710  | -2.996810 |
| C | -3.832537 | 2.671420  | 1.733099  |
| H | -4.767280 | 2.506035  | 1.177758  |
| H | -3.474201 | 1.679167  | 2.052515  |
| H | -4.063623 | 3.252329  | 2.635664  |
| C | -4.512030 | -1.336220 | -1.262971 |
| C | -3.726787 | -2.225740 | -2.008037 |
| C | -5.499699 | -1.789209 | -0.373376 |
| C | -3.961607 | -3.596065 | -1.856255 |
| C | -5.704987 | -3.163657 | -0.261582 |
| C | -4.945847 | -4.082995 | -0.994310 |
| H | -3.349902 | -4.300965 | -2.426000 |
| H | -6.464753 | -3.530458 | 0.434404  |
| C | -2.623559 | -1.722837 | -2.898544 |
| H | -2.961630 | -0.908525 | -3.556176 |
| H | -1.792434 | -1.325308 | -2.294291 |
| H | -2.225256 | -2.529272 | -3.527802 |
| C | -6.264780 | -0.812590 | 0.478236  |
| H | -5.575388 | -0.237305 | 1.116207  |
| H | -6.825562 | -0.086230 | -0.129513 |
| H | -6.979807 | -1.332897 | 1.128535  |
| C | -0.196841 | 6.131750  | 1.330069  |
| H | 0.532101  | 6.545887  | 0.619930  |
| H | -0.821245 | 6.959762  | 1.699431  |
| H | 0.355997  | 5.731102  | 2.193396  |
| C | -5.175083 | -5.561347 | -0.823100 |
| H | -6.227195 | -5.822672 | -1.012621 |
| H | -4.546584 | -6.150922 | -1.504150 |
| H | -4.943820 | -5.872844 | 0.207438  |

103

Figure S12-1\_PA-SIMes(NaOtBu)-ts(1,4) / electronic energy: -3917.87960041 a.u. / lowest freq: -420.30 cm<sup>-1</sup>

|    |            |           |           |
|----|------------|-----------|-----------|
| Cu | 1.179850   | -0.046333 | 0.058207  |
| C  | -3.650430  | -1.022435 | -0.017570 |
| C  | -2.734301  | -1.129692 | 1.040310  |
| H  | -3.786057  | -1.957956 | -0.555798 |
| C  | -2.573476  | -0.131989 | 2.093310  |
| C  | -1.869257  | -2.309339 | 1.062855  |
| O  | -3.071020  | 1.070646  | 1.766133  |
| O  | -2.067932  | -0.312115 | 3.191998  |
| O  | -1.028702  | -2.596011 | 1.906475  |
| O  | -2.064552  | -3.121484 | 0.014078  |
| C  | -1.056289  | -4.081521 | -0.234810 |
| H  | -0.095973  | -3.575833 | -0.416355 |
| H  | -1.364619  | -4.625784 | -1.135010 |
| H  | -0.943303  | -4.780057 | 0.606354  |
| C  | -3.101747  | 2.065963  | 2.774706  |
| H  | -3.540938  | 1.675242  | 3.702943  |
| H  | -3.718017  | 2.881326  | 2.378944  |
| H  | -2.090600  | 2.439766  | 2.986141  |
| C  | -4.795340  | -0.122544 | -0.126259 |
| H  | -4.746641  | 0.835235  | 0.388923  |
| C  | -5.884390  | -0.477438 | -0.834989 |
| H  | -5.874533  | -1.448985 | -1.343439 |
| C  | -7.116756  | 0.302651  | -1.012874 |
| C  | -8.146581  | -0.230921 | -1.805013 |
| C  | -7.319128  | 1.564334  | -0.425152 |
| C  | -9.335974  | 0.465950  | -2.007191 |
| H  | -8.007921  | -1.210431 | -2.270297 |
| C  | -8.506706  | 2.260517  | -0.626111 |
| H  | -6.540417  | 2.007711  | 0.198751  |
| C  | -9.521010  | 1.715702  | -1.417590 |
| H  | -10.121822 | 0.030360  | -2.628214 |
| H  | -8.644386  | 3.238509  | -0.159482 |
| H  | -10.452808 | 2.264070  | -1.571696 |
| C  | -0.071193  | -0.734508 | -1.460498 |
| H  | 0.690955   | -0.942110 | -2.219475 |
| C  | -1.284224  | -0.518757 | -1.775186 |
| C  | -2.613969  | -0.322145 | -1.978611 |
| H  | -3.191247  | -1.131588 | -2.431344 |
| H  | -2.989787  | 0.689927  | -2.161824 |
| Na | 0.068539   | -1.188547 | 3.241836  |
| O  | 0.991091   | 0.333259  | 1.998382  |
| C  | 1.314325   | 1.591252  | 2.490055  |
| C  | 0.721945   | 2.685353  | 1.583783  |
| H  | 0.891981   | 3.702255  | 1.975571  |
| H  | 1.181270   | 2.626305  | 0.583907  |
| H  | -0.361829  | 2.526013  | 1.468804  |
| C  | 2.840559   | 1.764297  | 2.553375  |
| H  | 3.142233   | 2.779055  | 2.862312  |
| H  | 3.276614   | 1.039711  | 3.260270  |
| H  | 3.259439   | 1.563116  | 1.559201  |
| C  | 0.738955   | 1.742991  | 3.911482  |
| H  | 0.921596   | 2.743037  | 4.337145  |

|   |           |           |           |
|---|-----------|-----------|-----------|
| H | -0.345850 | 1.557386  | 3.901259  |
| H | 1.203311  | 1.006202  | 4.590000  |
| C | 4.830944  | 0.590248  | -2.204910 |
| H | 5.761101  | 1.117795  | -1.956561 |
| C | 4.883175  | -0.899706 | -1.872874 |
| H | 4.999075  | -1.532174 | -2.762985 |
| C | 2.962542  | 0.040923  | -0.882696 |
| C | 3.152897  | -2.396582 | -0.807933 |
| C | 2.696546  | -3.309946 | -1.771841 |
| C | 3.207921  | -2.742047 | 0.555296  |
| C | 2.295490  | -4.580361 | -1.349914 |
| C | 2.777992  | -4.017408 | 0.929448  |
| C | 2.324263  | -4.952414 | -0.004738 |
| N | 3.710206  | 1.046387  | -1.371950 |
| N | 3.580999  | -1.104925 | -1.228532 |
| H | 5.693509  | -1.149019 | -1.167012 |
| H | 4.606153  | 0.777566  | -3.268289 |
| H | 2.805585  | -4.290783 | 1.988537  |
| H | 1.926430  | -5.291348 | -2.095026 |
| C | 2.630724  | -2.943032 | -3.230713 |
| H | 2.453706  | -1.867444 | -3.370786 |
| H | 3.573117  | -3.189951 | -3.746763 |
| H | 1.826627  | -3.495004 | -3.736179 |
| C | 3.691203  | -1.766889 | 1.595169  |
| H | 4.576985  | -1.212906 | 1.250372  |
| H | 2.910906  | -1.017968 | 1.817340  |
| H | 3.952186  | -2.290377 | 2.525620  |
| C | 3.420786  | 2.431904  | -1.211105 |
| C | 2.337334  | 3.007191  | -1.892756 |
| C | 4.240872  | 3.203002  | -0.367257 |
| C | 2.061125  | 4.360964  | -1.677536 |
| C | 3.927806  | 4.550397  | -0.186256 |
| C | 2.836179  | 5.147152  | -0.824081 |
| H | 1.208507  | 4.811463  | -2.193703 |
| H | 4.550810  | 5.151543  | 0.482894  |
| C | 1.467622  | 2.190331  | -2.807258 |
| H | 2.062312  | 1.501609  | -3.425423 |
| H | 0.766636  | 1.570168  | -2.228136 |
| H | 0.880989  | 2.838179  | -3.472393 |
| C | 5.436373  | 2.607223  | 0.328706  |
| H | 5.297116  | 1.536496  | 0.530621  |
| H | 6.345240  | 2.715886  | -0.285712 |
| H | 5.623935  | 3.114927  | 1.284551  |
| C | 1.886734  | -6.326957 | 0.429469  |
| H | 1.171535  | -6.763204 | -0.282433 |
| H | 2.747674  | -7.012050 | 0.493454  |
| H | 1.413578  | -6.300813 | 1.421522  |
| C | 2.515043  | 6.599731  | -0.586872 |
| H | 3.353544  | 7.246322  | -0.888683 |
| H | 1.624579  | 6.913055  | -1.149003 |
| H | 2.326907  | 6.789911  | 0.481027  |

103

Figure S12-1\_PA-SIMes(NaOtBu)-ed(1,4) / electronic energy: -3917.90470258 a.u. / lowest freq: 9.65 cm<sup>-1</sup>

|    |           |           |           |
|----|-----------|-----------|-----------|
| Cu | -1.626308 | 0.035665  | 0.021274  |
| C  | 4.547675  | 1.130909  | -0.032858 |
| C  | 3.404339  | 1.275941  | 0.693959  |
| H  | 4.710466  | 1.899734  | -0.792821 |
| C  | 2.944727  | 0.340961  | 1.758111  |
| C  | 2.526072  | 2.446839  | 0.402352  |
| O  | 3.538457  | -0.845482 | 1.704750  |
| O  | 2.101744  | 0.589855  | 2.594259  |
| O  | 1.619313  | 2.846090  | 1.104609  |
| O  | 2.836169  | 3.047006  | -0.741228 |
| C  | 2.047682  | 4.169694  | -1.113239 |
| H  | 0.985235  | 3.893445  | -1.165853 |
| H  | 2.409811  | 4.480983  | -2.098281 |
| H  | 2.170529  | 4.986736  | -0.388673 |
| C  | 3.082885  | -1.837518 | 2.618295  |
| H  | 3.233794  | -1.511522 | 3.656106  |
| H  | 3.676182  | -2.733287 | 2.408962  |
| H  | 2.016316  | -2.041754 | 2.452491  |
| C  | 5.594698  | 0.142984  | 0.054363  |
| H  | 5.523727  | -0.632768 | 0.813632  |
| C  | 6.637900  | 0.186616  | -0.804795 |
| H  | 6.652571  | 0.982054  | -1.558584 |
| C  | 7.774481  | -0.737187 | -0.850256 |
| C  | 8.755370  | -0.556205 | -1.839438 |
| C  | 7.926149  | -1.801125 | 0.057392  |
| C  | 9.853282  | -1.409493 | -1.922840 |
| H  | 8.650903  | 0.264512  | -2.553645 |
| C  | 9.022687  | -2.651428 | -0.025294 |
| H  | 7.181118  | -1.968798 | 0.837335  |
| C  | 9.989866  | -2.459180 | -1.015330 |
| H  | 10.605062 | -1.254157 | -2.699384 |
| H  | 9.125898  | -3.471492 | 0.688244  |
| H  | 10.849214 | -3.130244 | -1.077546 |
| C  | 0.158056  | 0.484788  | -0.812894 |
| H  | 0.317767  | 1.460668  | -1.306961 |
| C  | 1.088941  | -0.397476 | -1.045859 |

|    |           |           |           |
|----|-----------|-----------|-----------|
| C  | 1.978996  | -1.358408 | -1.268647 |
| H  | 2.851462  | -1.491527 | -0.620244 |
| H  | 1.871665  | -2.044997 | -2.116396 |
| Na | 0.008556  | 1.420705  | 2.002058  |
| O  | -1.477578 | -0.150558 | 2.062748  |
| C  | -1.762134 | -1.380728 | 2.623722  |
| C  | -1.245513 | -2.521064 | 1.721588  |
| H  | -1.419593 | -3.520102 | 2.156223  |
| H  | -1.752291 | -2.482786 | 0.742048  |
| H  | -0.163703 | -2.398541 | 1.546982  |
| C  | -3.282906 | -1.547554 | 2.795599  |
| H  | -3.565217 | -2.542548 | 3.179296  |
| H  | -3.674142 | -0.784281 | 3.487768  |
| H  | -3.761964 | -1.400559 | 1.816876  |
| C  | -1.076687 | -1.487705 | 3.998267  |
| H  | -1.270206 | -2.452002 | 4.497697  |
| H  | 0.012528  | -1.369662 | 3.878618  |
| H  | -1.433363 | -0.680023 | 4.658383  |
| C  | -5.371241 | -0.168965 | -2.026224 |
| H  | -6.337625 | -0.592267 | -1.721106 |
| C  | -5.233340 | 1.316291  | -1.669482 |
| H  | -5.318425 | 1.974550  | -2.545532 |
| C  | -3.380165 | 0.140367  | -0.817189 |
| C  | -3.212132 | 2.540165  | -0.679935 |
| C  | -2.459726 | 3.251673  | -1.625953 |
| C  | -3.232356 | 2.915649  | 0.673618  |
| C  | -1.727776 | 4.361398  | -1.196827 |
| C  | -2.468994 | 4.020961  | 1.061141  |
| C  | -1.706007 | 4.751472  | 0.145364  |
| N  | -4.257851 | -0.767424 | -1.280418 |
| N  | -3.889233 | 1.355934  | -1.090948 |
| H  | -5.981764 | 1.641586  | -0.926879 |
| H  | -5.243147 | -0.353323 | -3.106020 |
| H  | -2.464700 | 4.314525  | 2.115587  |
| H  | -1.140033 | 4.923056  | -1.928962 |
| C  | -2.380044 | 2.769654  | -3.048556 |
| H  | -1.956362 | 1.753172  | -3.074970 |
| H  | -3.369894 | 2.721702  | -3.526800 |
| H  | -1.742096 | 3.426329  | -3.655079 |
| C  | -3.972082 | 2.096698  | 1.695234  |
| H  | -4.930323 | 1.722529  | 1.307430  |
| H  | -3.354897 | 1.219827  | 1.964847  |
| H  | -4.167473 | 2.682839  | 2.604133  |
| C  | -4.049152 | -2.170413 | -1.167469 |
| C  | -3.011122 | -2.778708 | -1.895821 |
| C  | -4.860654 | -2.916215 | -0.297538 |
| C  | -2.778491 | -4.141775 | -1.702896 |
| C  | -4.594769 | -4.279628 | -0.143765 |
| C  | -3.551638 | -4.908490 | -0.826215 |
| H  | -1.964191 | -4.619552 | -2.255690 |
| H  | -5.215322 | -4.863810 | 0.542237  |
| C  | -2.152632 | -1.981065 | -2.839890 |
| H  | -2.762772 | -1.323806 | -3.477985 |
| H  | -1.462746 | -1.328830 | -2.280042 |
| H  | -1.560937 | -2.643487 | -3.485987 |
| C  | -5.993699 | -2.274880 | 0.459165  |
| H  | -5.773508 | -1.226131 | 0.702536  |
| H  | -6.924408 | -2.290669 | -0.131931 |
| H  | -6.191093 | -2.811041 | 1.397359  |
| C  | -0.839050 | 5.892557  | 0.609120  |
| H  | -0.562367 | 6.556445  | -0.222031 |
| H  | -1.341449 | 6.494120  | 1.380487  |
| H  | 0.092462  | 5.502029  | 1.050047  |
| C  | -3.243602 | -6.365632 | -0.599464 |
| H  | -4.134146 | -6.920369 | -0.271581 |
| H  | -2.855080 | -6.841187 | -1.511478 |
| H  | -2.475271 | -6.480854 | 0.182325  |

56

Figure S12-1\_SIMes-Cu-allenyl / electronic energy: -2680.78923765 a.u. / lowest freq: 16.67 cm<sup>-1</sup>

|    |           |           |           |
|----|-----------|-----------|-----------|
| C  | 0.255100  | -2.802091 | 0.505112  |
| H  | 0.668208  | -3.196427 | 1.444813  |
| C  | -1.270500 | -2.619391 | 0.554864  |
| H  | -1.800083 | -3.253354 | -0.170485 |
| C  | -0.267703 | -0.553149 | 0.091367  |
| C  | -2.705673 | -0.570588 | 0.110299  |
| C  | -3.379878 | -0.614762 | -1.117966 |
| C  | -3.248840 | 0.082482  | 1.227243  |
| C  | -4.637370 | -0.011781 | -1.202344 |
| C  | -4.506955 | 0.673704  | 1.096602  |
| C  | -5.220520 | 0.629249  | -0.105733 |
| Cu | 0.110016  | 1.307604  | -0.228361 |
| N  | 0.723169  | -1.433012 | 0.264097  |
| N  | -1.429749 | -1.197347 | 0.221108  |
| H  | -1.690544 | -2.824163 | 1.551562  |
| H  | 0.576639  | -3.468534 | -0.309931 |
| C  | 0.774672  | 3.096038  | -0.486998 |
| H  | 0.208773  | 4.016056  | -0.700711 |
| C  | 2.071525  | 3.214162  | -0.388898 |
| C  | 3.389142  | 3.271273  | -0.276397 |

|   |           |           |           |
|---|-----------|-----------|-----------|
| H | 4.042154  | 3.124597  | -1.143427 |
| H | 3.872005  | 3.450329  | 0.690170  |
| H | -4.940744 | 1.189169  | 1.958286  |
| H | -5.171125 | -0.034945 | -2.156636 |
| C | -2.739174 | -1.258856 | -2.318184 |
| H | -1.764393 | -0.794441 | -2.533026 |
| H | -2.557008 | -2.332599 | -2.157552 |
| H | -3.373859 | -1.155030 | -3.207828 |
| C | -2.466468 | 0.177007  | 2.509466  |
| H | -2.161688 | -0.814837 | 2.876499  |
| H | -1.543922 | 0.758395  | 2.352392  |
| H | -3.052793 | 0.668434  | 3.296712  |
| C | 2.100609  | -1.074402 | 0.152530  |
| C | 2.710868  | -1.089540 | -1.109969 |
| C | 2.796150  | -0.676303 | 1.303159  |
| C | 4.054490  | -0.718966 | -1.196317 |
| C | 4.137867  | -0.315360 | 1.170431  |
| C | 4.783410  | -0.329256 | -0.069282 |
| H | 4.541691  | -0.721123 | -2.175444 |
| H | 4.690272  | 0.002663  | 2.059240  |
| C | 1.914463  | -1.435151 | -2.339256 |
| H | 1.411113  | -2.409070 | -2.245646 |
| H | 1.129881  | -0.679297 | -2.505515 |
| H | 2.554756  | -1.464444 | -3.230551 |
| C | 2.087510  | -0.585650 | 2.627443  |
| H | 1.295980  | 0.179314  | 2.581836  |
| H | 1.603679  | -1.535221 | 2.901538  |
| H | 2.783525  | -0.310564 | 3.430477  |
| C | -6.591070 | 1.245868  | -0.208877 |
| H | -6.854724 | 1.465524  | -1.252764 |
| H | -7.356052 | 0.560144  | 0.189860  |
| H | -6.655115 | 2.179427  | 0.368353  |
| C | 6.214528  | 0.121736  | -0.194929 |
| H | 6.791322  | -0.109785 | 0.711774  |
| H | 6.712484  | -0.348829 | -1.054371 |
| H | 6.258068  | 1.212948  | -0.343793 |

71

Figure S12-1\_SIMes-Cu(NaOtBu)-allenyl / electronic energy: -3075.94872495 a.u. / lowest freq: 27.33 cm<sup>-1</sup>

|    |           |           |           |
|----|-----------|-----------|-----------|
| C  | -1.416490 | -3.051166 | 1.140808  |
| H  | -1.938914 | -3.883350 | 0.647034  |
| C  | 0.105264  | -3.256272 | 1.189618  |
| H  | 0.489715  | -3.368543 | 2.214600  |
| C  | -0.367529 | -1.221115 | 0.094618  |
| C  | 1.974999  | -1.659754 | 0.536902  |
| C  | 2.505484  | -0.907061 | 1.595408  |
| C  | 2.754988  | -2.014511 | -0.575804 |
| C  | 3.855470  | -0.537550 | 1.531896  |
| C  | 4.092020  | -1.614239 | -0.604374 |
| C  | 4.663223  | -0.881829 | 0.442809  |
| Cu | 0.053612  | 0.461472  | -0.784402 |
| N  | -1.541523 | -1.811212 | 0.365637  |
| N  | 0.599348  | -2.021713 | 0.574536  |
| H  | 0.429247  | -4.136362 | 0.611310  |
| H  | -1.859299 | -2.922390 | 2.141774  |
| C  | 0.755622  | 1.005974  | -2.588005 |
| H  | 0.218429  | 0.826130  | -3.532293 |
| C  | 1.953933  | 1.491432  | -2.679501 |
| C  | 3.189398  | 2.000319  | -2.625307 |
| H  | 4.075143  | 1.356894  | -2.689774 |
| H  | 3.357584  | 3.084119  | -2.621768 |
| H  | 4.704175  | -1.873694 | -1.472896 |
| H  | 4.283319  | 0.043656  | 2.354482  |
| C  | 1.617360  | -0.420541 | 2.707522  |
| H  | 0.978381  | 0.393096  | 2.317317  |
| H  | 0.955459  | -1.212613 | 3.085486  |
| H  | 2.210910  | -0.033680 | 3.547183  |
| C  | 2.127896  | -2.738861 | -1.734054 |
| H  | 1.621845  | -3.660932 | -1.412143 |
| H  | 1.367444  | -2.092973 | -2.200743 |
| H  | 2.877234  | -3.001217 | -2.492195 |
| C  | -2.794261 | -1.162873 | 0.170946  |
| C  | -3.195153 | -0.171583 | 1.079603  |
| C  | -3.592941 | -1.525176 | -0.923657 |
| C  | -4.433269 | 0.445296  | 0.876635  |
| C  | -4.823279 | -0.885304 | -1.085667 |
| C  | -5.261292 | 0.100708  | -0.195229 |
| H  | -4.757840 | 1.219932  | 1.577567  |
| H  | -5.455052 | -1.158544 | -1.936089 |
| C  | -2.285625 | 0.246411  | 2.203719  |
| H  | -1.940340 | -0.617407 | 2.792372  |
| H  | -1.387471 | 0.744744  | 1.796547  |
| H  | -2.795900 | 0.942716  | 2.883254  |
| C  | -3.105647 | -2.549996 | -1.912506 |
| H  | -2.132899 | -2.249759 | -2.331343 |
| H  | -2.964276 | -3.535448 | -1.442255 |
| H  | -3.818050 | -2.670411 | -2.739483 |
| C  | 6.113342  | -0.477713 | 0.387804  |
| H  | 6.368706  | 0.224936  | 1.192898  |
| H  | 6.768696  | -1.356952 | 0.487869  |

|    |           |           |           |
|----|-----------|-----------|-----------|
| H  | 6.354502  | -0.001942 | -0.574561 |
| C  | -6.579967 | 0.796614  | -0.412766 |
| H  | -7.347464 | 0.095753  | -0.772100 |
| H  | -6.946163 | 1.265949  | 0.510984  |
| H  | -6.480947 | 1.589574  | -1.171569 |
| O  | 0.444757  | 1.917070  | 0.659573  |
| C  | -0.144448 | 3.170287  | 0.563690  |
| C  | -0.341069 | 3.749935  | 1.976032  |
| H  | -0.987186 | 3.082226  | 2.567061  |
| H  | 0.630883  | 3.822894  | 2.491044  |
| H  | -0.799504 | 4.753042  | 1.961947  |
| C  | -1.515147 | 3.082233  | -0.136176 |
| H  | -2.004584 | 4.066198  | -0.228684 |
| H  | -1.384991 | 2.663904  | -1.147752 |
| H  | -2.188626 | 2.415496  | 0.422473  |
| C  | 0.749528  | 4.130584  | -0.252219 |
| H  | 0.940046  | 3.694674  | -1.245968 |
| H  | 0.291861  | 5.123935  | -0.390364 |
| H  | 1.716489  | 4.288346  | 0.258633  |
| Na | 2.583401  | 1.756705  | 0.072139  |

103

Figure S12-1\_PA-SIMes(NaOtBu)-ed(1,6) / electronic energy: -3917.90118513 a.u. / lowest freq: 13.39 cm-1

|    |           |           |           |
|----|-----------|-----------|-----------|
| C  | -1.352497 | 1.651473  | 3.417535  |
| H  | -2.228596 | 1.084571  | 3.769157  |
| C  | -0.020885 | 1.045133  | 3.886581  |
| H  | 0.632679  | 1.788481  | 4.366856  |
| C  | -0.149230 | 0.918148  | 1.549169  |
| C  | 1.753969  | -0.210934 | 2.552786  |
| C  | 1.610750  | -1.606883 | 2.472329  |
| C  | 3.015954  | 0.399133  | 2.570494  |
| C  | 4.039515  | -1.810226 | 2.361991  |
| Cu | 0.604485  | 0.839273  | -0.273997 |
| N  | -1.246491 | 1.558823  | 1.955536  |
| N  | 0.571533  | 0.584326  | 2.624950  |
| C  | 1.308134  | 0.054654  | -1.997302 |
| C  | 0.097372  | -0.642329 | -1.681227 |
| H  | -0.152511 | 0.206455  | 4.585718  |
| H  | -1.476234 | 2.697727  | 3.730597  |
| H  | 1.217868  | 0.825586  | -2.764218 |
| C  | 0.011316  | -2.019492 | -1.148993 |
| C  | -1.149762 | -0.086995 | -2.273562 |
| O  | 1.196192  | -2.590261 | -0.953779 |
| O  | -1.022112 | -2.619115 | -0.908550 |
| O  | -2.190214 | -0.682772 | -2.467633 |
| O  | -1.017020 | 1.198365  | -2.599233 |
| C  | -2.140432 | 1.839508  | -3.190710 |
| H  | -2.395807 | 1.364474  | -4.147830 |
| H  | -1.841959 | 2.880517  | -3.350664 |
| H  | -3.002795 | 1.791987  | -2.514059 |
| C  | 1.217042  | -3.939162 | -0.508849 |
| H  | 0.661665  | -4.053344 | 0.430440  |
| H  | 2.272806  | -4.185942 | -0.355847 |
| H  | 0.779645  | -4.602181 | -1.268069 |
| C  | 2.669308  | -0.341229 | -1.684783 |
| H  | 2.826824  | -1.091159 | -0.910007 |
| C  | 3.722033  | 0.234835  | -2.303187 |
| H  | 3.523064  | 0.961060  | -3.098012 |
| C  | 5.139763  | -0.051080 | -2.049384 |
| C  | 6.104848  | 0.424522  | -2.950992 |
| C  | 5.576215  | -0.780442 | -0.930639 |
| C  | 7.460655  | 0.172571  | -2.750906 |
| H  | 5.783195  | 1.000737  | -3.822651 |
| C  | 6.929608  | -1.030599 | -0.729170 |
| H  | 4.850129  | -1.132251 | -0.195955 |
| C  | 7.878541  | -0.557496 | -1.638786 |
| H  | 8.194476  | 0.549696  | -3.466666 |
| H  | 7.249639  | -1.594062 | 0.150019  |
| H  | 8.940590  | -0.753054 | -1.476072 |
| C  | 1.505689  | 2.596081  | -0.481979 |
| H  | 0.810078  | 3.441461  | -0.370691 |
| C  | 2.765652  | 2.841447  | -0.660558 |
| C  | 4.068224  | 3.002355  | -0.820966 |
| H  | 4.516795  | 3.102626  | -1.814186 |
| H  | 4.743798  | 3.051699  | 0.039833  |
| C  | 2.764038  | -2.384998 | 2.372526  |
| H  | 2.665955  | -3.472859 | 2.315074  |
| C  | 4.144068  | -0.421563 | 2.465265  |
| H  | 5.133844  | 0.043074  | 2.465298  |
| C  | 0.247035  | -2.242630 | 2.508992  |
| H  | -0.375448 | -1.823037 | 3.312335  |
| H  | -0.303086 | -2.080950 | 1.570124  |
| H  | 0.324764  | -3.325446 | 2.674267  |
| C  | 3.154576  | 1.888262  | 2.725721  |
| H  | 2.482217  | 2.421557  | 2.039742  |
| H  | 2.912511  | 2.199759  | 3.754602  |
| H  | 4.183719  | 2.208615  | 2.516786  |
| C  | -2.344246 | 1.876760  | 1.101121  |
| C  | -2.576509 | 3.203210  | 0.718628  |
| C  | -3.192545 | 0.832313  | 0.693771  |

|    |           |           |           |
|----|-----------|-----------|-----------|
| C  | -3.687526 | 3.466740  | -0.092381 |
| C  | -4.281737 | 1.135198  | -0.122793 |
| C  | -4.547643 | 2.452206  | -0.517918 |
| H  | -4.912350 | 0.299738  | -0.451579 |
| C  | -1.677765 | 4.319041  | 1.181160  |
| H  | -1.651611 | 5.133810  | 0.444632  |
| H  | -2.038523 | 4.746851  | 2.130950  |
| H  | -0.650641 | 3.966383  | 1.347415  |
| C  | -2.936191 | -0.589292 | 1.111592  |
| H  | -2.029042 | -0.976493 | 0.622778  |
| H  | -2.771083 | -0.676289 | 2.196499  |
| H  | -3.792307 | -1.217959 | 0.817920  |
| C  | 5.263240  | -2.681228 | 2.247174  |
| H  | 5.235580  | -3.500672 | 2.980594  |
| H  | 5.327412  | -3.143448 | 1.248860  |
| H  | 6.184652  | -2.106336 | 2.413273  |
| C  | -5.728712 | 2.747549  | -1.405418 |
| H  | -5.860889 | 3.826682  | -1.564297 |
| H  | -5.606433 | 2.270523  | -2.390928 |
| H  | -6.657155 | 2.347194  | -0.970873 |
| H  | -3.879080 | 4.498609  | -0.401375 |
| Na | -3.314477 | -2.358532 | -1.416399 |
| O  | -5.235512 | -2.053576 | -0.636948 |
| H  | -7.415357 | -1.598929 | -2.084290 |
| H  | -6.959107 | -3.985778 | -1.293126 |
| C  | -7.475303 | -1.293373 | -1.026976 |
| H  | -7.171773 | -0.235327 | -0.966111 |
| C  | -7.004337 | -3.629439 | -0.250588 |
| H  | -8.528426 | -1.367761 | -0.704516 |
| C  | -6.517014 | -2.163321 | -0.179865 |
| H  | -6.338077 | -4.267747 | 0.353191  |
| H  | -8.036868 | -3.764212 | 0.116155  |
| C  | -6.615962 | -1.694007 | 1.291873  |
| H  | -5.949860 | -2.307581 | 1.920765  |
| H  | -6.282723 | -0.646516 | 1.373810  |
| H  | -7.638432 | -1.765296 | 1.701738  |

103

Figure S12-1\_PA-SIMes(NaOtBu)-ts(1,6) / electronic energy: -3917.89152237 a.u. / lowest freq: -424.76 cm<sup>-1</sup>

|    |           |           |           |
|----|-----------|-----------|-----------|
| C  | -1.327443 | 1.038541  | 3.668426  |
| H  | -2.210756 | 0.423824  | 3.901635  |
| C  | -0.004491 | 0.343137  | 4.025938  |
| H  | 0.646936  | 0.972705  | 4.650394  |
| C  | -0.109668 | 0.656281  | 1.704763  |
| C  | 1.785491  | -0.640465 | 2.505548  |
| C  | 1.646740  | -2.006762 | 2.210612  |
| C  | 3.044922  | -0.034654 | 2.614230  |
| C  | 4.076546  | -2.185139 | 2.082363  |
| Cu | 0.562033  | 0.859296  | -0.137174 |
| N  | -1.207744 | 1.219254  | 2.215522  |
| N  | 0.602422  | 0.131061  | 2.705800  |
| C  | 1.288497  | 0.358141  | -2.007278 |
| C  | 0.064663  | -0.396301 | -1.815297 |
| H  | -0.149498 | -0.615062 | 4.545738  |
| H  | -1.447836 | 2.009306  | 4.170142  |
| H  | 1.179352  | 1.230165  | -2.656157 |
| C  | 0.016228  | -1.823902 | -1.494320 |
| C  | -1.174939 | 0.224228  | -2.312203 |
| O  | 1.223379  | -2.364546 | -1.295592 |
| O  | -0.990614 | -2.513170 | -1.410134 |
| O  | -2.239740 | -0.326183 | -2.530877 |
| O  | -1.036100 | 1.542058  | -2.519700 |
| C  | -2.172400 | 2.244463  | -2.999208 |
| H  | -2.499345 | 1.845614  | -3.969660 |
| H  | -1.858481 | 3.288250  | -3.106619 |
| H  | -2.997984 | 2.170930  | -2.279831 |
| C  | 1.292032  | -3.766796 | -1.098980 |
| H  | 0.665602  | -4.082251 | -0.254860 |
| H  | 2.344614  | -3.989191 | -0.892645 |
| H  | 0.965279  | -4.300655 | -2.002822 |
| C  | 2.610945  | 0.041537  | -1.644760 |
| H  | 2.804895  | -0.806047 | -0.987080 |
| C  | 3.668728  | 0.841276  | -2.082717 |
| H  | 3.462190  | 1.474796  | -2.948218 |
| C  | 5.088404  | 0.451810  | -1.936716 |
| C  | 6.035469  | 0.947575  | -2.844730 |
| C  | 5.531604  | -0.391199 | -0.906080 |
| C  | 7.382719  | 0.607902  | -2.733284 |
| H  | 5.708691  | 1.610125  | -3.650845 |
| C  | 6.877365  | -0.728342 | -0.792031 |
| H  | 4.817812  | -0.769179 | -0.172036 |
| C  | 7.809996  | -0.231876 | -1.705364 |
| H  | 8.102759  | 1.002056  | -3.454025 |
| H  | 7.202850  | -1.382489 | 0.020020  |
| H  | 8.865638  | -0.495543 | -1.611894 |
| C  | 1.374840  | 2.740157  | 0.010598  |
| H  | 0.680589  | 3.370941  | 0.565052  |
| C  | 2.559660  | 2.909488  | -0.397633 |
| C  | 3.811116  | 2.746757  | -0.896456 |
| H  | 4.120660  | 3.310417  | -1.780437 |

|    |           |           |           |
|----|-----------|-----------|-----------|
| H  | 4.612239  | 2.480349  | -0.199258 |
| C  | 2.803548  | -2.757838 | 2.000292  |
| H  | 2.708405  | -3.823460 | 1.773595  |
| C  | 4.176075  | -0.827581 | 2.397108  |
| H  | 5.164457  | -0.365517 | 2.472139  |
| C  | 0.284089  | -2.637517 | 2.118228  |
| H  | -0.344651 | -2.381483 | 2.983431  |
| H  | -0.255794 | -2.292483 | 1.223817  |
| H  | 0.360511  | -3.731627 | 2.068885  |
| C  | 3.175330  | 1.423452  | 2.959373  |
| H  | 2.534769  | 2.040415  | 2.313626  |
| H  | 2.881871  | 1.612770  | 4.004131  |
| H  | 4.212432  | 1.763146  | 2.837934  |
| C  | -2.301988 | 1.670986  | 1.417438  |
| C  | -2.551087 | 3.040094  | 1.266893  |
| C  | -3.125288 | 0.702387  | 0.813939  |
| C  | -3.645135 | 3.425822  | 0.481019  |
| C  | -4.197845 | 1.128422  | 0.033117  |
| C  | -4.475623 | 2.490402  | -0.137887 |
| H  | -4.808595 | 0.355708  | -0.448890 |
| C  | -1.692515 | 4.082537  | 1.933665  |
| H  | -1.457775 | 4.900909  | 1.237692  |
| H  | -2.214054 | 4.527625  | 2.795897  |
| H  | -0.748387 | 3.659250  | 2.302138  |
| C  | -2.858190 | -0.767572 | 0.983204  |
| H  | -1.957727 | -1.059726 | 0.420951  |
| H  | -2.675590 | -1.034076 | 2.035223  |
| H  | -3.717295 | -1.341795 | 0.600374  |
| C  | 5.303957  | -3.012965 | 1.806511  |
| H  | 5.221722  | -4.012343 | 2.257696  |
| H  | 5.439490  | -3.156074 | 0.721935  |
| H  | 6.211695  | -2.532067 | 2.196845  |
| C  | -5.652941 | 2.917707  | -0.975152 |
| H  | -5.651766 | 4.001432  | -1.157568 |
| H  | -5.653618 | 2.402225  | -1.947486 |
| H  | -6.600644 | 2.660360  | -0.476191 |
| H  | -3.845033 | 4.493309  | 0.347998  |
| Na | -3.277778 | -2.191105 | -1.756681 |
| O  | -5.189879 | -1.963861 | -0.917809 |
| H  | -7.362523 | -1.239999 | -2.263073 |
| H  | -7.009248 | -3.717115 | -1.783415 |
| C  | -7.398163 | -1.063948 | -1.175393 |
| H  | -7.046962 | -0.035472 | -0.990896 |
| C  | -7.025161 | -3.495804 | -0.703405 |
| H  | -8.449987 | -1.132632 | -0.847356 |
| C  | -6.469941 | -2.073318 | -0.457948 |
| H  | -6.381242 | -4.234076 | -0.197731 |
| H  | -8.058170 | -3.630281 | -0.337797 |
| C  | -6.534963 | -1.786653 | 1.062180  |
| H  | -5.889798 | -2.499381 | 1.602099  |
| H  | -6.156378 | -0.771940 | 1.266575  |
| H  | -7.555942 | -1.865511 | 1.474371  |

103

Figure S12-1\_PA-SIMes(NaOtBu)-prod(1,6) / electronic energy: -3917.94472680 a.u. / lowest freq: 14.26 cm<sup>-1</sup>

|    |           |           |           |
|----|-----------|-----------|-----------|
| C  | 1.022383  | 3.805280  | -0.691424 |
| H  | 1.892754  | 3.859216  | -1.360750 |
| C  | -0.314724 | 3.815127  | -1.444651 |
| H  | -0.921725 | 4.703601  | -1.223058 |
| C  | -0.164274 | 1.855939  | -0.167419 |
| C  | -2.249711 | 2.185050  | -1.400410 |
| C  | -2.340683 | 1.230980  | -2.425332 |
| C  | -3.394679 | 2.759908  | -0.826669 |
| C  | -4.772963 | 1.433661  | -2.344844 |
| Cu | -0.600353 | 0.146935  | 0.621116  |
| N  | 0.987154  | 2.508225  | -0.004363 |
| N  | -0.963484 | 2.595598  | -0.944462 |
| C  | -1.006708 | -1.749203 | 1.329365  |
| C  | 0.284452  | -2.033128 | 0.695202  |
| H  | -0.188836 | 3.751606  | -2.536777 |
| H  | 1.101779  | 4.622383  | 0.041312  |
| H  | -0.960713 | -1.768551 | 2.422643  |
| C  | 0.432557  | -2.481835 | -0.672305 |
| C  | 1.459207  | -2.040552 | 1.552719  |
| O  | -0.731896 | -2.501695 | -1.354751 |
| O  | 1.467980  | -2.814200 | -1.239240 |
| O  | 2.588266  | -2.418638 | 1.268551  |
| O  | 1.208888  | -1.555299 | 2.787518  |
| C  | 2.291693  | -1.526741 | 3.699396  |
| H  | 2.697423  | -2.534565 | 3.867779  |
| H  | 1.887581  | -1.125429 | 4.635833  |
| H  | 3.094045  | -0.874279 | 3.329800  |
| C  | -0.687041 | -2.954444 | -2.695713 |
| H  | 0.009982  | -2.352803 | -3.296032 |
| H  | -1.705451 | -2.845267 | -3.086120 |
| H  | -0.378294 | -4.008439 | -2.746599 |
| C  | -2.224023 | -1.407062 | 0.795447  |
| H  | -2.398739 | -1.452190 | -0.281589 |
| C  | -3.426517 | -1.153888 | 1.682750  |
| H  | -3.236717 | -1.618398 | 2.662750  |



|    |           |           |           |
|----|-----------|-----------|-----------|
| C  | -4.686245 | -1.777232 | 1.111875  |
| C  | -5.399029 | -2.739408 | 1.833663  |
| C  | -5.163967 | -1.395791 | -0.148650 |
| C  | -6.561554 | -3.309484 | 1.312017  |
| H  | -5.037482 | -3.050334 | 2.817656  |
| C  | -6.323823 | -1.962979 | -0.672664 |
| H  | -4.621525 | -0.647383 | -0.732101 |
| C  | -7.027905 | -2.922548 | 0.056729  |
| H  | -7.103581 | -4.060940 | 1.890698  |
| H  | -6.680271 | -1.654932 | -1.657967 |
| H  | -7.936089 | -3.368412 | -0.354697 |
| C  | -1.583681 | 1.406494  | 3.277923  |
| H  | -0.745438 | 1.805223  | 3.819961  |
| C  | -2.533885 | 0.962689  | 2.671310  |
| C  | -3.651724 | 0.359807  | 1.947573  |
| H  | -4.577897 | 0.496883  | 2.528125  |
| H  | -3.791983 | 0.886297  | 0.989483  |
| C  | -3.612072 | 0.867854  | -2.878055 |
| H  | -3.695442 | 0.121016  | -3.672550 |
| C  | -4.643735 | 2.370617  | -1.314697 |
| H  | -5.543508 | 2.804423  | -0.869360 |
| C  | -1.103668 | 0.597282  | -3.001303 |
| H  | -0.333646 | 1.344494  | -3.241712 |
| H  | -0.657694 | -0.101985 | -2.277300 |
| H  | -1.337234 | 0.034879  | -3.914587 |
| C  | -3.274609 | 3.747669  | 0.302528  |
| H  | -2.562740 | 3.391989  | 1.062373  |
| H  | -2.914171 | 4.725676  | -0.054364 |
| H  | -4.246797 | 3.910128  | 0.786348  |
| C  | 2.123369  | 1.984851  | 0.682730  |
| C  | 2.420466  | 2.432426  | 1.977165  |
| C  | 2.939332  | 1.052862  | 0.019468  |
| C  | 3.561632  | 1.919463  | 2.603293  |
| C  | 4.072854  | 0.572657  | 0.676252  |
| C  | 4.398393  | 0.998634  | 1.968270  |
| H  | 4.705009  | -0.146211 | 0.134914  |
| C  | 1.552448  | 3.448455  | 2.671530  |
| H  | 1.620310  | 3.342178  | 3.763231  |
| H  | 1.868576  | 4.475401  | 2.425304  |
| H  | 0.498624  | 3.350938  | 2.374603  |
| C  | 2.604647  | 0.551985  | -1.359871 |
| H  | 1.733074  | -0.120739 | -1.320483 |
| H  | 2.344693  | 1.372720  | -2.045893 |
| H  | 3.462558  | -0.007971 | -1.763123 |
| C  | -6.132966 | 1.053828  | -2.867478 |
| H  | -6.513002 | 1.823865  | -3.557703 |
| H  | -6.101210 | 0.103169  | -3.417942 |
| H  | -6.862594 | 0.958541  | -2.050120 |
| C  | 5.636599  | 0.471436  | 2.645541  |
| H  | 5.617191  | 0.653608  | 3.729535  |
| H  | 5.750283  | -0.609222 | 2.474650  |
| H  | 6.539126  | 0.957134  | 2.240939  |
| H  | 3.797661  | 2.250174  | 3.619300  |
| Na | 3.666998  | -2.517475 | -0.724942 |
| O  | 5.288494  | -1.450974 | -1.499086 |
| H  | 7.713806  | -1.722934 | -0.450022 |
| H  | 7.232026  | -2.839743 | -2.691769 |
| C  | 7.508581  | -0.749737 | -0.925357 |
| H  | 7.135756  | -0.066671 | -0.144857 |
| C  | 7.008701  | -1.849595 | -3.121803 |
| H  | 8.460127  | -0.344329 | -1.311448 |
| C  | 6.433021  | -0.925248 | -2.023921 |
| H  | 6.256906  | -1.989688 | -3.916088 |
| H  | 7.931341  | -1.456009 | -3.582870 |
| C  | 6.163352  | 0.462961  | -2.652885 |
| H  | 5.403935  | 0.369511  | -3.446728 |
| H  | 5.764097  | 1.146999  | -1.886017 |
| H  | 7.066814  | 0.921932  | -3.090578 |

88

Figure S12-1\_PA-PPh3(NaOtBu)-prod(1,4) / electronic energy: -4028.96421775 a.u. / lowest freq: 14.38 cm-1

|    |           |           |           |
|----|-----------|-----------|-----------|
| Cu | -1.003543 | -1.050129 | -0.600510 |
| C  | 1.928108  | -0.531587 | -0.812347 |
| C  | 1.196734  | -1.485863 | 0.135687  |
| H  | 1.647197  | 0.477098  | -0.497176 |
| C  | 1.171095  | -2.903831 | -0.135928 |
| C  | 1.028839  | -1.076481 | 1.511529  |
| O  | 1.788182  | -3.220557 | -1.299834 |
| O  | 0.662769  | -3.803764 | 0.532320  |
| O  | 0.594820  | -1.744303 | 2.450872  |
| O  | 1.418063  | 0.199997  | 1.748542  |
| C  | 1.318593  | 0.664358  | 3.082220  |
| H  | 0.285585  | 0.606068  | 3.451912  |
| H  | 1.645411  | 1.711330  | 3.064484  |
| H  | 1.971488  | 0.083188  | 3.749374  |
| C  | 1.635284  | -4.544957 | -1.767611 |
| H  | 2.051708  | -5.273781 | -1.057847 |
| H  | 2.178440  | -4.599438 | -2.718356 |
| H  | 0.573460  | -4.781773 | -1.934153 |
| C  | 3.425594  | -0.628715 | -0.692316 |

|    |           |           |           |
|----|-----------|-----------|-----------|
| H  | 3.854243  | -1.616585 | -0.897122 |
| C  | 4.206659  | 0.402280  | -0.345467 |
| H  | 3.724062  | 1.370543  | -0.166940 |
| C  | 5.671585  | 0.396622  | -0.176511 |
| C  | 6.335128  | 1.615068  | 0.036539  |
| C  | 6.444639  | -0.776526 | -0.215067 |
| C  | 7.718968  | 1.666735  | 0.196856  |
| H  | 5.751683  | 2.539279  | 0.074286  |
| C  | 7.826468  | -0.727270 | -0.054585 |
| H  | 5.959270  | -1.743411 | -0.364328 |
| C  | 8.471891  | 0.494294  | 0.151032  |
| H  | 8.210708  | 2.628596  | 0.359337  |
| H  | 8.405942  | -1.652967 | -0.085823 |
| H  | 9.555965  | 0.529816  | 0.279290  |
| C  | -1.003659 | -1.479786 | -2.778278 |
| H  | -1.902973 | -1.875679 | -3.218946 |
| C  | 0.104344  | -1.043978 | -2.486132 |
| C  | 1.501616  | -0.631682 | -2.301473 |
| H  | 1.655598  | 0.347636  | -2.781708 |
| H  | 2.125917  | -1.358388 | -2.840474 |
| Na | -1.020258 | -3.230321 | 1.936310  |
| O  | -2.288878 | -2.069183 | 0.517257  |
| C  | -3.458869 | -2.668082 | 0.063170  |
| C  | -3.124557 | -3.917246 | -0.772566 |
| H  | -4.024141 | -4.415361 | -1.169558 |
| H  | -2.477502 | -3.639177 | -1.618398 |
| H  | -2.569778 | -4.647836 | -0.161748 |
| C  | -4.285030 | -1.691956 | -0.788159 |
| H  | -5.228741 | -2.139535 | -1.140039 |
| H  | -4.521707 | -0.786237 | -0.208275 |
| H  | -3.706295 | -1.370460 | -1.666638 |
| C  | -4.302846 | -3.087554 | 1.281351  |
| H  | -5.253781 | -3.561799 | 0.989727  |
| H  | -3.751782 | -3.808710 | 1.908360  |
| H  | -4.530804 | -2.204491 | 1.899159  |
| P  | -1.430514 | 1.276217  | -0.150201 |
| C  | -3.044439 | 1.654909  | -0.938906 |
| C  | -3.193983 | 1.344527  | -2.298231 |
| C  | -4.135538 | 2.180882  | -0.239703 |
| C  | -4.406351 | 1.564843  | -2.946622 |
| H  | -2.352761 | 0.920787  | -2.853327 |
| C  | -5.354873 | 2.386848  | -0.886062 |
| H  | -4.040327 | 2.423578  | 0.820565  |
| C  | -5.493353 | 2.080264  | -2.238839 |
| H  | -4.507855 | 1.322360  | -4.006671 |
| H  | -6.201585 | 2.791030  | -0.326964 |
| H  | -6.449125 | 2.241142  | -2.742277 |
| C  | -0.384600 | 2.704886  | -0.661407 |
| C  | 0.885528  | 2.847460  | -0.078952 |
| C  | -0.779015 | 3.625548  | -1.639562 |
| C  | 1.735722  | 3.879432  | -0.468100 |
| H  | 1.210446  | 2.139764  | 0.685792  |
| C  | 0.078295  | 4.653927  | -2.035082 |
| H  | -1.764254 | 3.548523  | -2.102291 |
| C  | 1.337044  | 4.784737  | -1.452889 |
| H  | 2.717606  | 3.975787  | 0.001253  |
| H  | -0.247574 | 5.360808  | -2.801276 |
| H  | 2.006292  | 5.590208  | -1.762786 |
| C  | -1.751786 | 1.571579  | 1.628456  |
| C  | -1.526624 | 2.791979  | 2.274431  |
| C  | -2.265546 | 0.486064  | 2.353586  |
| C  | -1.802064 | 2.925370  | 3.635340  |
| H  | -1.129607 | 3.644285  | 1.718695  |
| C  | -2.552403 | 0.631100  | 3.710458  |
| H  | -2.427686 | -0.473320 | 1.840294  |
| C  | -2.316249 | 1.846310  | 4.35057   |
| H  | -1.617531 | 3.879277  | 4.134371  |
| H  | -2.953148 | -0.216905 | 4.271069  |
| H  | -2.530538 | 1.954193  | 5.420779  |

88

Figure S12-1\_PA-PPh3(NaOtBu)-ts(1,4) / electronic energy: -4028.89777635 a.u. / lowest freq: -353.66 cm<sup>-1</sup>

|    |           |           |           |
|----|-----------|-----------|-----------|
| Cu | -0.737850 | -0.679811 | -0.643617 |
| C  | 3.141478  | 0.604844  | 0.239369  |
| C  | 2.149668  | -0.188984 | 0.837225  |
| H  | 3.008057  | 1.673580  | 0.406296  |
| C  | 2.191495  | -1.652802 | 0.830504  |
| C  | 1.072626  | 0.466370  | 1.572480  |
| O  | 2.897057  | -2.147835 | -0.194534 |
| O  | 1.676239  | -2.403184 | 1.645618  |
| O  | 0.202030  | -0.080109 | 2.238300  |
| O  | 1.112015  | 1.807201  | 1.497316  |
| C  | 0.181819  | 2.521965  | 2.293430  |
| H  | -0.849959 | 2.219192  | 2.073004  |
| H  | 0.320795  | 3.580418  | 2.047796  |
| H  | 0.376649  | 2.354361  | 3.362861  |
| C  | 3.029207  | -3.557420 | -0.264899 |
| H  | 3.495831  | -3.958716 | 0.645817  |
| H  | 3.663611  | -3.760137 | -1.134626 |
| H  | 2.047735  | -4.033345 | -0.401168 |

|    |           |           |           |
|----|-----------|-----------|-----------|
| C  | 4.535239  | 0.209294  | 0.039789  |
| H  | 4.743812  | -0.851675 | -0.099304 |
| C  | 5.530606  | 1.114757  | 0.049595  |
| H  | 5.268909  | 2.170765  | 0.185490  |
| C  | 6.967006  | 0.844973  | -0.109228 |
| C  | 7.869094  | 1.920094  | -0.054067 |
| C  | 7.487369  | -0.444670 | -0.319672 |
| C  | 9.239842  | 1.719902  | -0.204388 |
| H  | 7.484044  | 2.930383  | 0.107860  |
| C  | 8.855708  | -0.645449 | -0.469377 |
| H  | 6.815210  | -1.303791 | -0.369154 |
| C  | 9.739457  | 0.435172  | -0.412871 |
| H  | 9.921412  | 2.572264  | -0.159494 |
| H  | 9.238865  | -1.655232 | -0.632740 |
| H  | 10.812806 | 0.273874  | -0.533167 |
| C  | 0.366726  | -0.037470 | -2.176475 |
| H  | -0.257178 | -0.131843 | -3.075253 |
| C  | 1.533091  | 0.471062  | -2.194276 |
| C  | 2.786965  | 0.948375  | -2.012460 |
| H  | 2.959729  | 2.028462  | -1.966142 |
| H  | 3.634945  | 0.340211  | -2.337927 |
| Na | -0.506241 | -2.226650 | 2.257122  |
| O  | -1.321823 | -2.364115 | 0.221047  |
| C  | -1.641060 | -3.513520 | -0.490125 |
| C  | -0.890181 | -3.562467 | -1.831011 |
| H  | -1.062453 | -4.506582 | -2.373253 |
| H  | -1.212979 | -2.730412 | -2.477757 |
| H  | 0.190933  | -3.446506 | -1.657194 |
| C  | -3.155870 | -3.552538 | -0.762893 |
| H  | -3.460096 | -4.448990 | -1.328449 |
| H  | -3.710815 | -3.541205 | 0.189390  |
| H  | -3.454447 | -2.660087 | -1.335398 |
| C  | -1.242279 | -4.743705 | 0.346873  |
| H  | -1.478981 | -5.696293 | -0.154064 |
| H  | -0.159245 | -4.719404 | 0.550320  |
| H  | -1.773529 | -4.730173 | 1.313504  |
| P  | -2.508250 | 0.767917  | -0.172711 |
| C  | -3.894769 | 0.197894  | -1.235089 |
| C  | -3.612197 | 0.006884  | -2.595636 |
| C  | -5.172526 | -0.110989 | -0.758459 |
| C  | -4.587855 | -0.478186 | -3.462066 |
| H  | -2.614687 | 0.235038  | -2.980127 |
| C  | -6.148017 | -0.604871 | -1.626204 |
| H  | -5.410733 | 0.025037  | 0.298432  |
| C  | -5.859058 | -0.791047 | -2.976722 |
| H  | -4.353111 | -0.622840 | -4.518741 |
| H  | -7.141097 | -0.845032 | -1.239945 |
| H  | -6.623023 | -1.180340 | -3.653213 |
| C  | -2.405281 | 2.551456  | -0.572540 |
| C  | -1.130618 | 3.108894  | -0.727576 |
| C  | -3.535974 | 3.361632  | -0.750009 |
| C  | -0.986789 | 4.464315  | -1.027027 |
| H  | -0.248030 | 2.472891  | -0.618440 |
| C  | -3.390992 | 4.713712  | -1.050676 |
| H  | -4.535836 | 2.929999  | -0.653095 |
| C  | -2.115344 | 5.267181  | -1.185217 |
| H  | 0.011400  | 4.891759  | -1.144572 |
| H  | -4.276409 | 5.338971  | -1.184409 |
| H  | -2.002750 | 6.327739  | -1.421166 |
| C  | -3.213516 | 0.681021  | 1.513961  |
| C  | -3.595263 | 1.787327  | 2.277795  |
| C  | -3.320274 | -0.606295 | 2.065416  |
| C  | -4.081710 | 1.611021  | 3.575389  |
| H  | -3.511166 | 2.795599  | 1.866375  |
| C  | -3.820557 | -0.778492 | 3.353113  |
| H  | -2.984807 | -1.463098 | 1.467091  |
| C  | -4.200018 | 0.331319  | 4.113448  |
| H  | -4.373120 | 2.482765  | 4.165610  |
| H  | -3.910593 | -1.783924 | 3.771856  |
| H  | -4.587280 | 0.196195  | 5.125778  |

88

Figure S12-1\_PA-PPh3(NaOtBu)-ed(1,4) / electronic energy: -4028.91570865 a.u. / lowest freq: 15.81 cm-1

|    |           |           |           |
|----|-----------|-----------|-----------|
| Cu | -0.570023 | 0.562313  | -1.431087 |
| C  | 0.998863  | -2.748327 | 0.151397  |
| C  | -0.241966 | -2.996970 | -0.350070 |
| H  | 1.165458  | -3.079027 | 1.181621  |
| C  | -0.674776 | -2.741002 | -1.750259 |
| C  | -1.269008 | -3.584256 | 0.557395  |
| O  | 0.332155  | -2.632609 | -2.601725 |
| O  | -1.833443 | -2.695826 | -2.112666 |
| O  | -2.458205 | -3.345045 | 0.507083  |
| O  | -0.749250 | -4.416324 | 1.449148  |
| C  | -1.651960 | -5.047455 | 2.351772  |
| H  | -2.235479 | -4.299783 | 2.903121  |
| H  | -1.032411 | -5.634382 | 3.037079  |
| H  | -2.336930 | -5.707261 | 1.801765  |
| C  | -0.007443 | -2.325274 | -3.950889 |
| H  | -0.598175 | -3.138601 | -4.393464 |
| H  | 0.944148  | -2.214288 | -4.480382 |

|    |           |           |           |
|----|-----------|-----------|-----------|
| H  | -0.579339 | -1.387902 | -3.988264 |
| C  | 2.101917  | -2.049379 | -0.456954 |
| H  | 1.940937  | -1.554934 | -1.414556 |
| C  | 3.291108  | -1.978431 | 0.180761  |
| H  | 3.397561  | -2.500649 | 1.138596  |
| C  | 4.473805  | -1.242333 | -0.266774 |
| C  | 5.668381  | -1.363985 | 0.461004  |
| C  | 4.438184  | -0.363131 | -1.363486 |
| C  | 6.797250  | -0.629117 | 0.107317  |
| H  | 5.705307  | -2.037027 | 1.321432  |
| C  | 5.562723  | 0.377782  | -1.709088 |
| H  | 3.511912  | -0.215229 | -1.922943 |
| C  | 6.745837  | 0.247262  | -0.976913 |
| H  | 7.718620  | -0.734248 | 0.683815  |
| H  | 5.509310  | 1.074144  | -2.548422 |
| H  | 7.626250  | 0.833229  | -1.249759 |
| C  | 0.985259  | 0.801422  | -2.624594 |
| H  | 1.218026  | 0.133595  | -3.471102 |
| C  | 1.801684  | 1.808876  | -2.488788 |
| C  | 2.606271  | 2.838971  | -2.257573 |
| H  | 2.433053  | 3.820525  | -2.712222 |
| H  | 3.476073  | 2.738018  | -1.597364 |
| Na | -3.270908 | -1.512185 | -0.713052 |
| O  | -2.558940 | 0.436928  | -1.410323 |
| C  | -3.309369 | 1.196634  | -2.299214 |
| C  | -2.977236 | 0.817846  | -3.753750 |
| H  | -3.560941 | 1.400327  | -4.485587 |
| H  | -1.905524 | 0.992038  | -3.941268 |
| H  | -3.179472 | -0.252745 | -3.921080 |
| C  | -3.028654 | 2.694716  | -2.092539 |
| H  | -3.640616 | 3.333217  | -2.751142 |
| H  | -3.225193 | 2.975354  | -1.045503 |
| H  | -1.965930 | 2.903732  | -2.294532 |
| C  | -4.804212 | 0.930041  | -2.040241 |
| H  | -5.460896 | 1.540180  | -2.681127 |
| H  | -5.046957 | -0.128619 | -2.235630 |
| H  | -5.047229 | 1.152366  | -0.988323 |
| P  | -0.391215 | 0.950690  | 0.893545  |
| C  | -1.009983 | 2.680454  | 1.030729  |
| C  | -0.455257 | 3.593212  | 0.121512  |
| C  | -1.949023 | 3.135174  | 1.961509  |
| C  | -0.837520 | 4.931987  | 0.141691  |
| H  | 0.285402  | 3.254368  | -0.611078 |
| C  | -2.341288 | 4.474732  | 1.970672  |
| H  | -2.383871 | 2.446546  | 2.688922  |
| C  | -1.789742 | 5.375438  | 1.060374  |
| H  | -0.397619 | 5.630146  | -0.574011 |
| H  | -3.080159 | 4.815572  | 2.699601  |
| H  | -2.098939 | 6.423123  | 1.069148  |
| C  | 1.194593  | 1.145633  | 1.801526  |
| C  | 2.364779  | 1.134799  | 1.037020  |
| C  | 1.276134  | 1.422518  | 3.174627  |
| C  | 3.602497  | 1.387811  | 1.632834  |
| H  | 2.297238  | 0.937991  | -0.035587 |
| C  | 2.511457  | 1.656652  | 3.771849  |
| H  | 0.367119  | 1.461142  | 3.780791  |
| C  | 3.677422  | 1.640126  | 3.000218  |
| H  | 4.508465  | 1.377842  | 1.021918  |
| H  | 2.567221  | 1.864327  | 4.842858  |
| H  | 4.645149  | 1.830738  | 3.469839  |
| C  | -1.468285 | -0.032805 | 1.998532  |
| C  | -0.963959 | -0.941472 | 2.937578  |
| C  | -2.858834 | 0.032912  | 1.805234  |
| C  | -1.828988 | -1.731790 | 3.695259  |
| H  | 0.113221  | -1.029360 | 3.094367  |
| C  | -3.719842 | -0.756458 | 2.564201  |
| H  | -3.254144 | 0.700514  | 1.035226  |
| C  | -3.207839 | -1.638765 | 3.516923  |
| H  | -1.417171 | -2.423097 | 4.434160  |
| H  | -4.798739 | -0.681660 | 2.408554  |
| H  | -3.882264 | -2.254919 | 4.115500  |

41

Figure S12-1\_PPh3-Cu-allenyl / electronic energy: -2791.78064609 a.u. / lowest freq: -8.52 cm<sup>-1</sup>

|    |           |           |           |
|----|-----------|-----------|-----------|
| Cu | 1.925957  | 0.441034  | -0.969324 |
| C  | 3.695423  | 0.782212  | -1.650311 |
| H  | 3.901621  | 1.250294  | -2.626132 |
| C  | 4.739409  | 0.464057  | -0.934464 |
| C  | 5.764894  | 0.124180  | -0.171645 |
| H  | 6.228054  | -0.865398 | -0.246897 |
| H  | 6.190086  | 0.825011  | 0.554818  |
| P  | -0.093017 | 0.040978  | -0.106258 |
| C  | -0.713342 | 1.391986  | 0.957863  |
| C  | -1.380331 | 1.168166  | 2.166791  |
| C  | -0.511650 | 2.705927  | 0.513218  |
| C  | -1.849259 | 2.247854  | 2.915852  |
| H  | -1.535294 | 0.149778  | 2.529631  |
| C  | -0.989950 | 3.780817  | 1.258089  |
| H  | 0.022539  | 2.889678  | -0.423318 |
| C  | -1.658731 | 3.552160  | 2.461671  |

|   |           |           |           |
|---|-----------|-----------|-----------|
| H | -2.365753 | 2.066564  | 3.860640  |
| H | -0.832329 | 4.800736  | 0.901689  |
| H | -2.027713 | 4.394962  | 3.049984  |
| C | -0.164393 | -1.456811 | 0.937848  |
| C | -1.315396 | -2.246691 | 1.042854  |
| C | 0.979917  | -1.802657 | 1.668371  |
| C | -1.322993 | -3.362695 | 1.878346  |
| H | -2.210179 | -1.992779 | 0.469631  |
| C | 0.967011  | -2.915256 | 2.507351  |
| H | 1.889455  | -1.202122 | 1.577400  |
| C | -0.184532 | -3.695898 | 2.612619  |
| H | -2.223689 | -3.975283 | 1.954422  |
| H | 1.863220  | -3.177711 | 3.073131  |
| H | -0.192646 | -4.571265 | 3.265682  |
| C | -1.410845 | -0.201190 | -1.350523 |
| C | -2.710237 | 0.290159  | -1.183020 |
| C | -1.089521 | -0.925749 | -2.506174 |
| C | -3.679067 | 0.050420  | -2.157376 |
| H | -2.969562 | 0.864064  | -0.290291 |
| C | -2.061407 | -1.169847 | -3.473746 |
| H | -0.072030 | -1.299724 | -2.651497 |
| C | -3.357069 | -0.680980 | -3.300219 |
| H | -4.690190 | 0.439664  | -2.021497 |
| H | -1.803574 | -1.735870 | -4.371205 |
| H | -4.117079 | -0.866243 | -4.062285 |

56

Figure S12-1\_PPh3-Cu(NaOtBu)-allenyl / electronic energy: -3186.94946047 a.u. / lowest freq: 17.55 cm-1

|    |           |           |           |
|----|-----------|-----------|-----------|
| O  | 2.679707  | 0.458749  | 0.336658  |
| C  | 2.876149  | 1.711501  | -0.232810 |
| C  | 2.633294  | 1.652168  | -1.752236 |
| H  | 2.809636  | 2.620386  | -2.249231 |
| H  | 3.294363  | 0.899036  | -2.210771 |
| H  | 1.589467  | 1.355851  | -1.946640 |
| C  | 4.326321  | 2.161911  | 0.022150  |
| H  | 4.533981  | 3.164074  | -0.386653 |
| H  | 4.527002  | 2.185912  | 1.105618  |
| H  | 5.034277  | 1.457346  | -0.446128 |
| C  | 1.921287  | 2.752429  | 0.378207  |
| H  | 2.082453  | 2.826681  | 1.465553  |
| H  | 2.064136  | 3.752928  | -0.061754 |
| H  | 0.876391  | 2.454588  | 0.207938  |
| Na | 4.192004  | -1.067646 | 0.727870  |
| Cu | 1.288500  | -0.822764 | -0.375650 |
| C  | 1.862085  | -2.640772 | -0.993184 |
| H  | 1.147514  | -3.293574 | -1.520932 |
| C  | 3.055867  | -3.124853 | -0.836663 |
| C  | 4.312629  | -3.520639 | -0.623418 |
| H  | 4.581162  | -4.116181 | 0.256848  |
| H  | 5.095647  | -3.351353 | -1.371235 |
| P  | -0.849096 | -0.136694 | -0.070969 |
| C  | -1.422126 | 1.401939  | -0.887995 |
| C  | -1.965520 | 2.490874  | -0.198747 |
| C  | -1.242163 | 1.495869  | -2.276049 |
| C  | -2.324058 | 3.651887  | -0.885475 |
| H  | -2.105372 | 2.438775  | 0.882938  |
| C  | -1.609174 | 2.650658  | -2.961685 |
| H  | -0.805874 | 0.656470  | -2.825549 |
| C  | -2.148620 | 3.734255  | -2.265657 |
| H  | -2.743417 | 4.497278  | -0.335680 |
| H  | -1.463921 | 2.710205  | -4.042426 |
| H  | -2.427750 | 4.644810  | -2.800279 |
| C  | -1.109293 | 0.184208  | 1.717995  |
| C  | -2.355102 | 0.071958  | 2.347964  |
| C  | 0.013135  | 0.561068  | 2.468941  |
| C  | -2.480470 | 0.346901  | 3.708744  |
| H  | -3.233946 | -0.233334 | 1.774683  |
| C  | -0.118773 | 0.842233  | 3.829048  |
| H  | 0.989112  | 0.631426  | 1.974082  |
| C  | -1.363114 | 0.735464  | 4.449972  |
| H  | -3.454915 | 0.255060  | 4.193448  |
| H  | 0.758739  | 1.139359  | 4.408150  |
| H  | -1.464204 | 0.948820  | 5.516554  |
| C  | -2.179813 | -1.336092 | -0.471572 |
| C  | -3.448087 | -0.965991 | -0.934674 |
| C  | -1.891947 | -2.693953 | -0.277907 |
| C  | -4.415282 | -1.938638 | -1.189436 |
| H  | -3.683903 | 0.088070  | -1.099146 |
| C  | -2.862629 | -3.663398 | -0.521896 |
| H  | -0.894077 | -2.988180 | 0.059831  |
| C  | -4.126367 | -3.286819 | -0.979558 |
| H  | -5.400936 | -1.639769 | -1.553207 |
| H  | -2.629320 | -4.718478 | -0.363103 |
| H  | -4.885415 | -4.046554 | -1.178719 |

88

Figure S12-1\_PA-PPh3(NaOtBu)-ed(1,6) / electronic energy: -4028.88980074 a.u. / lowest freq: 13.33 cm-1

|    |           |           |          |
|----|-----------|-----------|----------|
| Na | 2.450641  | -3.074338 | 1.308034 |
| O  | 4.423596  | -2.746492 | 0.623327 |
| Cu | -1.192041 | 0.723724  | 0.500555 |
| C  | -2.296177 | -0.875188 | 1.205317 |

|   |           |           |           |
|---|-----------|-----------|-----------|
| C | -0.944971 | -1.296006 | 1.048034  |
| H | -2.548774 | -0.532170 | 2.211862  |
| C | -0.426622 | -2.119540 | -0.072870 |
| C | -0.091323 | -1.239508 | 2.272298  |
| O | -1.263293 | -2.207318 | -1.104345 |
| O | 0.657300  | -2.664089 | -0.095355 |
| O | 0.814374  | -1.994039 | 2.554660  |
| O | -0.448134 | -0.240526 | 3.076182  |
| C | 0.250182  | -0.115965 | 4.311120  |
| H | 0.067850  | -0.996119 | 4.942833  |
| H | -0.148054 | 0.783942  | 4.789974  |
| H | 1.327226  | -0.007056 | 4.131627  |
| C | -0.870613 | -3.045202 | -2.187870 |
| H | 0.117651  | -2.754627 | -2.566426 |
| H | -1.633639 | -2.911144 | -2.961625 |
| H | -0.838837 | -4.094978 | -1.865325 |
| C | -3.444083 | -1.153356 | 0.365828  |
| H | -3.273364 | -1.577065 | -0.621043 |
| C | -4.693782 | -0.880824 | 0.798743  |
| H | -4.813151 | -0.456411 | 1.801027  |
| C | -5.944527 | -1.128629 | 0.071100  |
| C | -7.164861 | -0.881118 | 0.719939  |
| C | -5.978861 | -1.605565 | -1.250649 |
| C | -8.379664 | -1.101588 | 0.075302  |
| H | -7.156562 | -0.505740 | 1.746589  |
| C | -7.191638 | -1.826142 | -1.895243 |
| H | -5.047912 | -1.800615 | -1.786489 |
| C | -8.397447 | -1.575601 | -1.236010 |
| H | -9.317121 | -0.901471 | 0.598533  |
| H | -7.197946 | -2.195614 | -2.923076 |
| H | -9.348008 | -1.747934 | -1.745237 |
| C | -2.458129 | 2.214523  | 0.737033  |
| H | -1.992452 | 3.157329  | 1.066256  |
| C | -3.733808 | 2.240140  | 0.492451  |
| C | -5.027576 | 2.202883  | 0.226669  |
| H | -5.761737 | 1.965517  | 1.002853  |
| H | -5.412665 | 2.415785  | -0.775933 |
| P | 0.869641  | 1.499836  | -0.208565 |
| C | 2.115088  | 1.243418  | 1.101485  |
| C | 2.172419  | 2.113067  | 2.200850  |
| C | 2.955128  | 0.126638  | 1.073202  |
| C | 3.089098  | 1.884969  | 3.225169  |
| H | 1.511378  | 2.982070  | 2.252725  |
| C | 3.868569  | -0.106085 | 2.100936  |
| H | 2.938155  | -0.585810 | 0.244922  |
| C | 3.941502  | 0.778559  | 3.175498  |
| H | 3.134948  | 2.577041  | 4.068909  |
| H | 4.498761  | -0.996274 | 1.990857  |
| H | 4.661996  | 0.609438  | 3.979098  |
| C | 0.929245  | 3.290949  | -0.591894 |
| C | 2.086757  | 4.060967  | -0.415644 |
| C | -0.204803 | 3.877707  | -1.166172 |
| C | 2.103668  | 5.399713  | -0.800650 |
| H | 2.980891  | 3.619695  | 0.030197  |
| C | -0.182757 | 5.216755  | -1.555565 |
| H | -1.114983 | 3.288396  | -1.301389 |
| C | 0.969477  | 5.979492  | -1.370701 |
| H | 3.009668  | 5.991677  | -0.655558 |
| H | -1.073534 | 5.665475  | -1.999818 |
| H | 0.984752  | 7.029845  | -1.669741 |
| C | 1.594175  | 0.767283  | -1.720091 |
| C | 0.770295  | 0.035107  | -2.579299 |
| C | 2.929750  | 0.997607  | -2.077776 |
| C | 1.275460  | -0.465420 | -3.780967 |
| H | -0.274673 | -0.143820 | -2.313177 |
| C | 3.433801  | 0.489995  | -3.270263 |
| H | 3.584660  | 1.571267  | -1.417903 |
| C | 2.606464  | -0.241797 | -4.124130 |
| H | 0.624949  | -1.034140 | -4.448627 |
| H | 4.479838  | 0.660931  | -3.531117 |
| H | 3.004631  | -0.641835 | -5.058924 |
| H | 6.298504  | -1.307492 | -1.775557 |
| H | 5.075966  | -0.528071 | -0.735786 |
| H | 6.534500  | -1.239940 | -0.003799 |
| C | 5.783565  | -1.368924 | -0.800824 |
| H | 3.238652  | -2.043289 | -1.658827 |
| C | 5.031521  | -2.707048 | -0.597598 |
| H | 6.585961  | -3.855881 | -1.707421 |
| H | 6.807690  | -3.776031 | 0.066194  |
| H | 3.463633  | -3.811364 | -1.640746 |
| C | 3.990422  | -2.846445 | -1.736170 |
| C | 6.057815  | -3.856119 | -0.737796 |
| H | 4.434826  | -2.797210 | -2.745864 |
| H | 5.546554  | -4.826628 | -0.623546 |

88

Figure S12-1\_PA-PPh3(NaOtBu)-ts(1,6) / electronic energy: -4028.87865129 a.u. / lowest freq: -449.09 cm<sup>-1</sup>

|    |           |           |           |
|----|-----------|-----------|-----------|
| Na | -2.536603 | -2.902598 | -1.322606 |
| O  | -4.488787 | -2.632480 | -0.546129 |
| Cu | 1.170459  | 0.711231  | -0.577139 |

|   |           |           |           |
|---|-----------|-----------|-----------|
| C | 2.314675  | -0.930227 | -1.276563 |
| C | 0.942024  | -1.366477 | -1.149405 |
| H | 2.582064  | -0.611776 | -2.288274 |
| C | 0.431605  | -2.205511 | -0.058587 |
| C | 0.094528  | -1.257183 | -2.353017 |
| O | 1.307990  | -2.382277 | 0.938174  |
| O | -0.673902 | -2.714191 | -0.001108 |
| O | -0.909897 | -1.894847 | -2.608539 |
| O | 0.545820  | -0.322835 | -3.203551 |
| C | -0.167664 | -0.156093 | -4.420616 |
| H | -0.107934 | -1.067232 | -5.032488 |
| H | 0.314750  | 0.678517  | -4.940199 |
| H | -1.221569 | 0.078971  | -4.221998 |
| C | 0.914414  | -3.250026 | 1.992825  |
| H | -0.035763 | -2.923895 | 2.435936  |
| H | 1.718262  | -3.206838 | 2.735487  |
| H | 0.798940  | -4.278230 | 1.622419  |
| C | 3.386522  | -1.010982 | -0.375766 |
| H | 3.208366  | -1.341189 | 0.645295  |
| C | 4.669031  | -0.611301 | -0.765284 |
| H | 4.846181  | -0.549475 | -1.841789 |
| C | 5.872480  | -0.939473 | 0.034895  |
| C | 7.106482  | -1.099075 | -0.611260 |
| C | 5.825206  | -1.092619 | 1.429530  |
| C | 8.256742  | -1.418034 | 0.108800  |
| H | 7.163735  | -0.974462 | -1.695998 |
| C | 6.973373  | -1.410075 | 2.149423  |
| H | 4.882410  | -0.949631 | 1.961884  |
| C | 8.194362  | -1.576750 | 1.492644  |
| H | 9.207038  | -1.543700 | -0.414718 |
| H | 6.915539  | -1.526478 | 3.233952  |
| H | 9.094414  | -1.825774 | 2.058890  |
| C | 2.397006  | 2.295018  | -0.867599 |
| H | 1.829769  | 3.223632  | -0.960687 |
| C | 3.645453  | 2.087775  | -0.813072 |
| C | 4.899520  | 1.582513  | -0.680523 |
| H | 5.572747  | 1.597170  | -1.542180 |
| H | 5.385429  | 1.671924  | 0.295953  |
| P | -0.826110 | 1.499240  | 0.229268  |
| C | -2.096070 | 1.266745  | -1.059685 |
| C | -2.092460 | 2.091730  | -2.194536 |
| C | -3.002169 | 0.205888  | -0.992029 |
| C | -3.014291 | 1.877456  | -3.216894 |
| H | -1.375648 | 2.913130  | -2.278248 |
| C | -3.919009 | -0.015458 | -2.019383 |
| H | -3.025612 | -0.478639 | -0.141077 |
| C | -3.931022 | 0.826062  | -3.129906 |
| H | -3.012315 | 2.534332  | -4.089625 |
| H | -4.592729 | -0.869911 | -1.887287 |
| H | -4.652159 | 0.664402  | -3.934467 |
| C | -0.865108 | 3.282708  | 0.645853  |
| C | -1.974489 | 4.103239  | 0.406591  |
| C | 0.253664  | 3.814704  | 1.300288  |
| C | -1.958573 | 5.437560  | 0.809735  |
| H | -2.857151 | 3.704256  | -0.098002 |
| C | 0.264643  | 5.147746  | 1.707208  |
| H | 1.124743  | 3.182304  | 1.492148  |
| C | -0.840336 | 5.961673  | 1.458526  |
| H | -2.827188 | 6.070372  | 0.616180  |
| H | 1.142716  | 5.552697  | 2.214273  |
| H | -0.830144 | 7.008179  | 1.770770  |
| C | -1.508394 | 0.738890  | 1.744404  |
| C | -0.695703 | -0.097530 | 2.513979  |
| C | -2.801418 | 1.045527  | 2.190931  |
| C | -1.168164 | -0.621159 | 3.718991  |
| H | 0.314751  | -0.338642 | 2.173772  |
| C | -3.273832 | 0.514737  | 3.386087  |
| H | -3.446360 | 1.698242  | 1.597500  |
| C | -2.455616 | -0.316902 | 4.153540  |
| H | -0.525785 | -1.268770 | 4.319269  |
| H | -4.287186 | 0.746602  | 3.719245  |
| H | -2.828448 | -0.733301 | 5.091602  |
| H | -6.325259 | -1.229222 | 1.903418  |
| H | -5.108642 | -0.434171 | 0.868768  |
| H | -6.577976 | -1.123711 | 0.135923  |
| C | -5.819970 | -1.273250 | 0.922649  |
| H | -3.267062 | -1.968533 | 1.726309  |
| C | -5.077042 | -2.611324 | 0.684139  |
| H | -6.619816 | -3.772484 | 1.798684  |
| H | -6.867879 | -3.661553 | 0.029980  |
| H | -3.494075 | -3.735140 | 1.683600  |
| C | -4.018485 | -2.771969 | 1.803184  |
| C | -6.106384 | -3.758210 | 0.821257  |
| H | -4.446309 | -2.738271 | 2.820764  |
| H | -5.600839 | -4.728434 | 0.682782  |

88

Figure S12-1\_PA-PPh3(NaOtBu)-prod(1,6) / electronic energy: -4028.93073582 a.u. / lowest freq: 14.54 cm-1

|    |          |           |          |
|----|----------|-----------|----------|
| Na | 2.130369 | -3.399350 | 0.637885 |
| O  | 4.218213 | -3.003469 | 0.406807 |

|    |           |           |           |
|----|-----------|-----------|-----------|
| Cu | -1.523334 | 1.465568  | -0.026093 |
| C  | -2.180909 | -0.733345 | 0.698604  |
| C  | -1.084557 | -1.657801 | 0.635074  |
| H  | -2.471263 | -0.515266 | 1.732093  |
| C  | -0.601207 | -2.258553 | -0.585413 |
| C  | -0.502467 | -2.105040 | 1.888290  |
| O  | -1.298598 | -1.883774 | -1.682702 |
| O  | 0.328282  | -3.048401 | -0.713686 |
| O  | 0.401157  | -2.919418 | 2.038071  |
| O  | -1.079300 | -1.552136 | 2.978069  |
| C  | -0.646407 | -2.021766 | 4.239604  |
| H  | -0.875997 | -3.090395 | 4.364449  |
| H  | -1.194563 | -1.436042 | 4.986839  |
| H  | 0.433785  | -1.874726 | 4.369303  |
| C  | -0.949173 | -2.513513 | -2.901982 |
| H  | 0.121939  | -2.397351 | -3.116129 |
| H  | -1.547184 | -2.025088 | -3.680516 |
| H  | -1.184827 | -3.587289 | -2.870433 |
| C  | -2.973863 | -0.116522 | -0.252808 |
| H  | -2.857065 | -0.380826 | -1.307182 |
| C  | -4.302486 | 0.513726  | 0.143229  |
| H  | -4.297331 | 0.660905  | 1.235240  |
| C  | -5.481672 | -0.383017 | -0.193747 |
| C  | -6.317663 | -0.870138 | 0.815644  |
| C  | -5.751983 | -0.749137 | -1.519019 |
| C  | -7.398371 | -1.699741 | 0.512353  |
| H  | -6.119585 | -0.599125 | 1.856219  |
| C  | -6.830291 | -1.575942 | -1.826315 |
| H  | -5.108485 | -0.390410 | -2.327014 |
| C  | -7.659057 | -2.054343 | -0.810118 |
| H  | -8.039767 | -2.069836 | 1.315399  |
| H  | -7.023880 | -1.849417 | -2.865988 |
| H  | -8.503826 | -2.703702 | -1.050110 |
| C  | -2.360796 | 3.483963  | 0.083138  |
| H  | -1.671208 | 4.280515  | 0.316851  |
| C  | -3.296610 | 2.741309  | -0.189852 |
| C  | -4.464701 | 1.908472  | -0.498071 |
| H  | -5.380392 | 2.407325  | -0.145108 |
| H  | -4.545948 | 1.817811  | -1.593253 |
| P  | 0.747788  | 1.653523  | 0.049686  |
| C  | 1.544926  | 0.756522  | 1.420662  |
| C  | 1.162938  | 1.067719  | 2.733876  |
| C  | 2.513605  | -0.225717 | 1.207002  |
| C  | 1.791936  | 0.445697  | 3.808620  |
| H  | 0.384256  | 1.812928  | 2.920977  |
| C  | 3.133127  | -0.862152 | 2.282442  |
| H  | 2.805262  | -0.526099 | 0.199014  |
| C  | 2.782578  | -0.514235 | 3.584516  |
| H  | 1.499626  | 0.704288  | 4.828811  |
| H  | 3.867586  | -1.636773 | 2.027728  |
| H  | 3.267907  | -1.002116 | 4.433127  |
| C  | 1.346749  | 3.383110  | 0.211445  |
| C  | 2.260391  | 3.805924  | 1.181214  |
| C  | 0.865853  | 4.309452  | -0.726090 |
| C  | 2.678327  | 5.137771  | 1.217419  |
| H  | 2.654503  | 3.097078  | 1.911928  |
| C  | 1.287496  | 5.635630  | -0.690857 |
| H  | 0.161334  | 3.988913  | -1.499417 |
| C  | 2.193483  | 6.053453  | 0.286047  |
| H  | 3.393032  | 5.456976  | 1.978720  |
| H  | 0.908681  | 6.345973  | -1.428633 |
| H  | 2.523169  | 7.094026  | 0.318027  |
| C  | 1.601582  | 1.116105  | -1.473825 |
| C  | 0.882351  | 0.439719  | -2.462683 |
| C  | 2.954591  | 1.417140  | -1.687776 |
| C  | 1.506558  | 0.073535  | -3.656609 |
| H  | -0.169496 | 0.194054  | -2.297718 |
| C  | 3.576469  | 1.040267  | -2.873073 |
| H  | 3.525189  | 1.951213  | -0.923810 |
| C  | 2.850854  | 0.372494  | -3.861607 |
| H  | 0.937126  | -0.445900 | -4.429851 |
| H  | 4.633151  | 1.266629  | -3.027082 |
| H  | 3.339127  | 0.081951  | -4.794013 |
| H  | 6.279139  | -1.088847 | -1.446087 |
| H  | 4.977839  | -0.546027 | -0.351896 |
| H  | 6.372527  | -1.435674 | 0.306290  |
| C  | 5.687926  | -1.363329 | -0.554692 |
| H  | 3.227503  | -1.770819 | -1.746980 |
| C  | 4.922333  | -2.698868 | -0.721374 |
| H  | 6.566481  | -3.587457 | -1.936530 |
| H  | 6.636434  | -3.928340 | -0.181243 |
| H  | 3.437856  | -3.503779 | -2.107238 |
| C  | 3.977813  | -2.555799 | -1.941359 |
| C  | 5.957694  | -3.803929 | -1.040920 |
| H  | 4.500710  | -2.293399 | -2.877813 |
| H  | 5.440226  | -4.764518 | -1.200696 |

6

Figure S13-1\_NaOMe / electronic energy: -277.276605389 a.u. / lowest freq: 96.46 cm-1

|   |           |           |          |
|---|-----------|-----------|----------|
| 0 | -0.316755 | -0.000577 | 0.003879 |
|---|-----------|-----------|----------|



|    |           |           |           |
|----|-----------|-----------|-----------|
| C  | -1.665390 | 0.000187  | -0.001547 |
| Na | 1.722853  | 0.000166  | -0.001070 |
| H  | -2.140426 | -0.936765 | -0.408364 |
| H  | -2.138619 | 0.820140  | -0.612161 |
| H  | -2.145961 | 0.118290  | 1.010551  |

32

Figure S13-1\_dienoate / electronic energy: -841.927078481 a.u. / lowest freq: 24.55 cm-1

|   |           |           |           |
|---|-----------|-----------|-----------|
| C | -0.660544 | -0.726572 | 0.059153  |
| C | -1.860539 | -0.097447 | 0.115996  |
| H | -0.691600 | -1.818492 | -0.004770 |
| C | -1.976243 | 1.390665  | 0.160143  |
| C | -3.120576 | -0.891785 | 0.187355  |
| O | -3.041424 | 1.823605  | -0.507466 |
| O | -1.182749 | 2.134043  | 0.689285  |
| O | -4.147702 | -0.497504 | 0.683440  |
| O | -2.981802 | -2.118850 | -0.320932 |
| C | -4.097604 | -2.989729 | -0.195724 |
| H | -4.332384 | -3.170881 | 0.862818  |
| H | -3.810049 | -3.927003 | -0.683244 |
| H | -4.981752 | -2.562067 | -0.688186 |
| C | -3.254671 | 3.228152  | -0.535442 |
| H | -3.354009 | 3.627502  | 0.483524  |
| H | -4.184056 | 3.384216  | -1.092621 |
| H | -2.420438 | 3.737793  | -1.038016 |
| C | 0.656646  | -0.129211 | 0.062308  |
| H | 0.725624  | 0.955889  | 0.150505  |
| C | 1.759981  | -0.902956 | -0.019704 |
| H | 1.621029  | -1.988149 | -0.089650 |
| C | 3.156351  | -0.453635 | -0.025165 |
| C | 4.175093  | -1.416830 | -0.109525 |
| C | 3.522207  | 0.902114  | 0.053056  |
| C | 5.517020  | -1.042840 | -0.114390 |
| H | 3.907556  | -2.474776 | -0.172060 |
| C | 4.861836  | 1.275255  | 0.048166  |
| H | 2.754752  | 1.675486  | 0.118691  |
| C | 5.863995  | 0.305241  | -0.035401 |
| H | 6.294080  | -1.807149 | -0.179427 |
| H | 5.127957  | 2.332459  | 0.111300  |
| H | 6.914980  | 0.602284  | -0.038425 |

94

Figure S13-1\_PA-SIMes(NaOMe)-prod(1,4) / electronic energy: -3800.11624361 a.u. / lowest freq: 12.17 cm-1

|    |            |           |           |
|----|------------|-----------|-----------|
| Cu | 1.108693   | 0.499494  | 0.119494  |
| C  | -2.828671  | 0.260716  | -0.350504 |
| C  | -2.268989  | -1.026042 | 0.240738  |
| H  | -2.729190  | 0.169040  | -1.438290 |
| C  | -2.320476  | -1.288497 | 1.639702  |
| C  | -1.582941  | -1.942977 | -0.610331 |
| O  | -3.034084  | -0.353677 | 2.336049  |
| O  | -1.818122  | -2.226490 | 2.272044  |
| O  | -0.883024  | -2.911223 | -0.284408 |
| O  | -1.733814  | -1.679264 | -1.939326 |
| C  | -1.046503  | -2.523300 | -2.833482 |
| H  | 0.028125   | -2.557057 | -2.608469 |
| H  | -1.204541  | -2.105932 | -3.835753 |
| H  | -1.434989  | -3.552838 | -2.798091 |
| C  | -3.160550  | -0.550378 | 3.726399  |
| H  | -3.640050  | -1.513459 | 3.955704  |
| H  | -3.787613  | 0.270249  | 4.096634  |
| H  | -2.181664  | -0.520501 | 4.227582  |
| C  | -4.289569  | 0.511131  | -0.075430 |
| H  | -4.556852  | 0.696729  | 0.967875  |
| C  | -5.232484  | 0.506515  | -1.026793 |
| H  | -4.926043  | 0.317904  | -2.063151 |
| C  | -6.679495  | 0.728636  | -0.838665 |
| C  | -7.515440  | 0.769989  | -1.966004 |
| C  | -7.272247  | 0.902706  | 0.424197  |
| C  | -8.888052  | 0.981816  | -1.843061 |
| H  | -7.076267  | 0.633035  | -2.958041 |
| C  | -8.642050  | 1.114817  | 0.549300  |
| H  | -6.655406  | 0.866933  | 1.324736  |
| C  | -9.458770  | 1.156402  | -0.583391 |
| H  | -9.514507  | 1.009229  | -2.737842 |
| H  | -9.079533  | 1.246512  | 1.541799  |
| H  | -10.533537 | 1.321509  | -0.481107 |
| C  | 0.287196   | 1.534123  | -1.358472 |
| H  | 0.801246   | 1.836214  | -2.259023 |
| C  | -0.614511  | 1.407899  | -0.507513 |
| C  | -1.975809  | 1.492121  | 0.061451  |
| H  | -2.440670  | 2.414348  | -0.325497 |
| H  | -1.942876  | 1.571319  | 1.156569  |
| Na | 0.338315   | -2.413054 | 1.558475  |
| O  | 0.983141   | -0.274579 | 1.903562  |
| C  | 0.332618   | 0.414343  | 2.908417  |
| C  | 5.244325   | 0.943407  | -0.828908 |
| H  | 5.895573   | 1.269251  | -0.003013 |
| C  | 5.153547   | -0.585183 | -0.947226 |
| H  | 5.389587   | -0.946302 | -1.959507 |
| C  | 3.030367   | 0.267866  | -0.413736 |
| C  | 3.226542   | -2.160122 | -0.473049 |

|   |           |           |           |
|---|-----------|-----------|-----------|
| C | 2.721276  | -2.835780 | -1.593025 |
| C | 3.245409  | -2.749634 | 0.800042  |
| C | 2.211129  | -4.122397 | -1.414077 |
| C | 2.729256  | -4.043955 | 0.930789  |
| C | 2.199037  | -4.740435 | -0.160615 |
| N | 3.851589  | 1.315549  | -0.555622 |
| N | 3.743048  | -0.841677 | -0.625761 |
| H | 5.812301  | -1.110496 | -0.240197 |
| H | 5.603537  | 1.419913  | -1.752231 |
| H | 2.735749  | -4.518287 | 1.916904  |
| H | 1.795601  | -4.651983 | -2.275604 |
| C | 2.706722  | -2.164922 | -2.940295 |
| H | 2.141608  | -1.220708 | -2.900894 |
| H | 3.724747  | -1.918301 | -3.278904 |
| H | 2.248756  | -2.811685 | -3.700107 |
| C | 3.727582  | -1.974135 | 1.995664  |
| H | 4.700754  | -1.495224 | 1.813466  |
| H | 2.991997  | -1.179542 | 2.216328  |
| H | 3.823269  | -2.626025 | 2.874698  |
| C | 3.446094  | 2.654778  | -0.285569 |
| C | 3.193689  | 3.529732  | -1.349118 |
| C | 3.277924  | 3.050959  | 1.053458  |
| C | 2.748954  | 4.821996  | -1.050636 |
| C | 2.826864  | 4.346695  | 1.302442  |
| C | 2.554182  | 5.246340  | 0.264634  |
| H | 2.536215  | 5.510972  | -1.873012 |
| H | 2.681813  | 4.665631  | 2.338773  |
| C | 3.388516  | 3.094256  | -2.777074 |
| H | 4.435795  | 3.230215  | -3.092875 |
| H | 3.147073  | 2.029784  | -2.910985 |
| H | 2.762141  | 3.685909  | -3.458432 |
| C | 3.553822  | 2.087430  | 2.177325  |
| H | 2.817178  | 1.267021  | 2.177453  |
| H | 4.547897  | 1.625761  | 2.074712  |
| H | 3.509506  | 2.596270  | 3.149244  |
| C | 1.585385  | -6.103511 | 0.016755  |
| H | 0.491791  | -6.016318 | 0.118827  |
| H | 1.783084  | -6.749250 | -0.850570 |
| H | 1.966726  | -6.603981 | 0.917571  |
| C | 2.054838  | 6.633872  | 0.572321  |
| H | 2.758730  | 7.172830  | 1.224699  |
| H | 1.917292  | 7.224767  | -0.343459 |
| H | 1.089174  | 6.594426  | 1.099440  |
| H | 0.292465  | -0.175442 | 3.850912  |
| H | -0.718557 | 0.672376  | 2.664889  |
| H | 0.831471  | 1.374543  | 3.174043  |

94

Figure S13-1\_PA-SIMes(NaOMe)-ts(1,4) / electronic energy: -3800.03623090 a.u. / lowest freq: -400.14 cm<sup>-1</sup>

|    |            |           |           |
|----|------------|-----------|-----------|
| Cu | 0.939238   | 0.005732  | 0.018743  |
| C  | -3.150573  | -1.382755 | -0.066425 |
| C  | -2.186619  | -1.426850 | 0.948253  |
| H  | -3.235960  | -2.314076 | -0.623615 |
| C  | -2.108337  | -0.440553 | 2.030223  |
| C  | -1.229167  | -2.527335 | 0.955997  |
| O  | -2.491833  | 0.785904  | 1.658495  |
| O  | -1.774537  | -0.673044 | 3.181766  |
| O  | -0.362445  | -2.747568 | 1.796124  |
| O  | -1.369335  | -3.352458 | -0.092490 |
| C  | -0.299108  | -4.239963 | -0.346029 |
| H  | 0.618518   | -3.671999 | -0.565685 |
| H  | -0.589052  | -4.829722 | -1.223471 |
| H  | -0.112388  | -4.905116 | 0.509070  |
| C  | -2.419827  | 1.800435  | 2.645221  |
| H  | -3.040217  | 1.550453  | 3.517956  |
| H  | -2.791463  | 2.714865  | 2.169361  |
| H  | -1.378795  | 1.937998  | 2.965750  |
| C  | -4.371400  | -0.578426 | -0.056767 |
| H  | -4.350469  | 0.360788  | 0.496320  |
| C  | -5.488144  | -0.980012 | -0.692154 |
| H  | -5.460229  | -1.932552 | -1.234784 |
| C  | -6.775686  | -0.271862 | -0.740789 |
| C  | -7.858734  | -0.875185 | -1.401133 |
| C  | -6.979722  | 0.991042  | -0.155941 |
| C  | -9.100304  | -0.246839 | -1.475138 |
| H  | -7.720633  | -1.855815 | -1.864386 |
| C  | -8.218831  | 1.619294  | -0.229569 |
| H  | -6.158615  | 1.492655  | 0.360367  |
| C  | -9.286134  | 1.004294  | -0.888717 |
| H  | -9.927193  | -0.737630 | -1.993482 |
| H  | -8.354367  | 2.600321  | 0.231488  |
| H  | -10.257216 | 1.500763  | -0.945466 |
| C  | 0.235585   | -0.806984 | -1.679366 |
| H  | 1.043523   | -0.931120 | -2.404381 |
| C  | -0.997870  | -0.641646 | -1.939469 |
| C  | -2.347544  | -0.517048 | -2.051591 |
| H  | -2.909031  | -1.327188 | -2.523112 |
| H  | -2.789329  | 0.480793  | -2.144044 |
| Na | 0.463290   | -1.246000 | 3.253293  |
| O  | 0.723990   | 0.476614  | 1.932420  |

|   |           |           |           |
|---|-----------|-----------|-----------|
| C | 1.245614  | 1.689497  | 2.310466  |
| C | 4.651656  | 1.725900  | -1.557495 |
| H | 5.375512  | 2.421589  | -1.112970 |
| C | 5.024865  | 0.258226  | -1.347283 |
| H | 5.405226  | -0.220764 | -2.259622 |
| C | 2.815404  | 0.604495  | -0.605988 |
| C | 3.597951  | -1.702860 | -0.634247 |
| C | 3.481512  | -2.623328 | -1.688678 |
| C | 3.578978  | -2.123764 | 0.706732  |
| C | 3.331017  | -3.975920 | -1.376724 |
| C | 3.416289  | -3.486757 | 0.969204  |
| C | 3.290418  | -4.427660 | -0.054839 |
| N | 3.344797  | 1.804719  | -0.890027 |
| N | 3.740955  | -0.316838 | -0.928917 |
| H | 5.776234  | 0.121906  | -0.551056 |
| H | 4.541069  | 1.983368  | -2.623963 |
| H | 3.387336  | -3.823342 | 2.009750  |
| H | 3.223703  | -4.697599 | -2.192118 |
| C | 3.514373  | -2.175005 | -3.125727 |
| H | 3.136865  | -1.149030 | -3.238101 |
| H | 4.542316  | -2.191900 | -3.523738 |
| H | 2.908435  | -2.839154 | -3.757122 |
| C | 3.701839  | -1.133153 | 1.834062  |
| H | 4.525011  | -0.423724 | 1.660876  |
| H | 2.775361  | -0.538992 | 1.921377  |
| H | 3.887581  | -1.647777 | 2.787256  |
| C | 2.689960  | 3.049691  | -0.665343 |
| C | 1.604563  | 3.424471  | -1.471022 |
| C | 3.151052  | 3.883760  | 0.368904  |
| C | 0.959633  | 4.634752  | -1.194510 |
| C | 2.482835  | 5.086081  | 0.601087  |
| C | 1.377302  | 5.475420  | -0.161810 |
| H | 0.107464  | 4.929529  | -1.813877 |
| H | 2.828451  | 5.734514  | 1.411888  |
| C | 1.129453  | 2.551172  | -2.599648 |
| H | 1.971375  | 2.090118  | -3.136556 |
| H | 0.507206  | 1.725820  | -2.222117 |
| H | 0.532229  | 3.130607  | -3.316665 |
| C | 4.338281  | 3.503590  | 1.213904  |
| H | 4.409378  | 2.414816  | 1.344442  |
| H | 5.279502  | 3.846579  | 0.753233  |
| H | 4.273753  | 3.967274  | 2.207628  |
| C | 3.111351  | -5.892855 | 0.245477  |
| H | 2.251535  | -6.306847 | -0.302692 |
| H | 3.998428  | -6.470010 | -0.059903 |
| H | 2.947905  | -6.067559 | 1.317724  |
| C | 0.658839  | 6.765395  | 0.138299  |
| H | 1.363816  | 7.608094  | 0.200014  |
| H | -0.089596 | 6.999486  | -0.631157 |
| H | 0.138402  | 6.705677  | 1.107184  |
| H | 1.067185  | 1.907364  | 3.391475  |
| H | 0.825238  | 2.559047  | 1.755088  |
| H | 2.350297  | 1.761968  | 2.169567  |

94

Figure S13-1\_PA-SIMes(NaOMe)-ed(1,4) / electronic energy: -3800.05869359 a.u. / lowest freq: 13.79 cm<sup>-1</sup>

|    |            |           |           |
|----|------------|-----------|-----------|
| Cu | 1.478307   | 0.095461  | 0.271493  |
| C  | -4.192674  | -1.466072 | -0.014437 |
| C  | -3.009673  | -1.653931 | 0.619934  |
| H  | -4.482480  | -2.233748 | -0.737071 |
| C  | -2.446173  | -0.725754 | 1.643836  |
| C  | -2.165294  | -2.838661 | 0.302519  |
| O  | -2.607304  | 0.549525  | 1.348753  |
| O  | -1.867520  | -1.101790 | 2.642762  |
| O  | -1.194285  | -3.199132 | 0.937860  |
| O  | -2.567265  | -3.479770 | -0.786948 |
| C  | -1.780427  | -4.586663 | -1.207743 |
| H  | -0.739742  | -4.274833 | -1.376713 |
| H  | -2.228219  | -4.939396 | -2.142172 |
| H  | -1.798638  | -5.385597 | -0.453674 |
| C  | -1.888918  | 1.485829  | 2.156668  |
| H  | -2.300526  | 1.508565  | 3.175535  |
| H  | -2.025047  | 2.457623  | 1.671738  |
| H  | -0.823762  | 1.201846  | 2.187100  |
| C  | -5.133486  | -0.383714 | 0.168995  |
| H  | -4.874279  | 0.410081  | 0.870439  |
| C  | -6.294587  | -0.350174 | -0.518499 |
| H  | -6.511941  | -1.176667 | -1.204751 |
| C  | -7.324582  | 0.691703  | -0.445155 |
| C  | -8.549074  | 0.482829  | -1.100598 |
| C  | -7.136202  | 1.899091  | 0.250834  |
| C  | -9.559004  | 1.441094  | -1.054298 |
| H  | -8.709328  | -0.448478 | -1.649827 |
| C  | -8.142831  | 2.857413  | 0.293126  |
| H  | -6.188764  | 2.099010  | 0.754936  |
| C  | -9.358682  | 2.631815  | -0.357071 |
| H  | -10.505733 | 1.258581  | -1.566916 |
| H  | -7.977406  | 3.792289  | 0.832642  |
| H  | -10.146192 | 3.387513  | -0.323018 |
| C  | -0.011239  | -0.695240 | -0.804154 |

|    |           |           |           |
|----|-----------|-----------|-----------|
| H  | 0.088773  | -1.759536 | -1.087389 |
| C  | -0.983880 | -0.073416 | -1.408478 |
| C  | -1.961723 | 0.613579  | -1.984973 |
| H  | -2.951590 | 0.681130  | -1.518044 |
| H  | -1.815377 | 1.135259  | -2.937813 |
| Na | 0.311055  | -1.827290 | 2.135908  |
| O  | 1.265773  | 0.128409  | 2.298737  |
| C  | 2.009926  | 1.057982  | 2.977929  |
| C  | 5.284195  | 1.168881  | -1.370423 |
| H  | 6.130421  | 1.682305  | -0.892984 |
| C  | 5.364153  | -0.358972 | -1.228535 |
| H  | 5.574225  | -0.864602 | -2.182167 |
| C  | 3.289886  | 0.389944  | -0.397793 |
| C  | 3.515222  | -2.004656 | -0.568124 |
| C  | 2.867626  | -2.621457 | -1.648070 |
| C  | 3.583432  | -2.618641 | 0.692212  |
| C  | 2.297486  | -3.881888 | -1.449496 |
| C  | 2.995689  | -3.876765 | 0.848400  |
| C  | 2.343536  | -4.521782 | -0.208143 |
| N  | 4.018199  | 1.477846  | -0.694493 |
| N  | 4.024756  | -0.684140 | -0.734598 |
| H  | 6.132014  | -0.673962 | -0.502854 |
| H  | 5.240461  | 1.492716  | -2.423603 |
| H  | 3.038037  | -4.362729 | 1.828081  |
| H  | 1.785589  | -4.367560 | -2.285757 |
| C  | 2.709612  | -1.891216 | -2.952487 |
| H  | 2.102349  | -0.986251 | -2.789040 |
| H  | 3.676063  | -1.569878 | -3.369030 |
| H  | 2.205408  | -2.518040 | -3.699962 |
| C  | 4.178348  | -1.889319 | 1.865130  |
| H  | 5.140111  | -1.418099 | 1.616682  |
| H  | 3.485364  | -1.088104 | 2.171549  |
| H  | 4.331902  | -2.565807 | 2.717002  |
| C  | 3.514911  | 2.802428  | -0.558936 |
| C  | 2.514509  | 3.250246  | -1.436861 |
| C  | 4.013283  | 3.627541  | 0.463332  |
| C  | 2.017508  | 4.546203  | -1.267320 |
| C  | 3.490262  | 4.915664  | 0.591260  |
| C  | 2.490972  | 5.393287  | -0.263001 |
| H  | 1.234858  | 4.902002  | -1.943575 |
| H  | 3.865426  | 5.562169  | 1.390403  |
| C  | 1.966900  | 2.350043  | -2.512097 |
| H  | 2.774208  | 1.857784  | -3.075581 |
| H  | 1.355480  | 1.546894  | -2.067883 |
| H  | 1.344299  | 2.915863  | -3.217932 |
| C  | 5.075716  | 3.129394  | 1.406407  |
| H  | 4.914782  | 2.071146  | 1.656893  |
| H  | 6.079377  | 3.214438  | 0.958506  |
| H  | 5.080776  | 3.712100  | 2.337511  |
| C  | 1.662740  | -5.848052 | 0.008504  |
| H  | 1.475973  | -6.365996 | -0.942696 |
| H  | 2.262886  | -6.509146 | 0.650486  |
| H  | 0.690399  | -5.699197 | 0.505195  |
| C  | 1.937043  | 6.783494  | -0.086498 |
| H  | 2.735762  | 7.539133  | -0.139664 |
| H  | 1.191197  | 7.021464  | -0.857234 |
| H  | 1.453932  | 6.892287  | 0.896993  |
| H  | 1.879987  | 0.992334  | 4.084169  |
| H  | 1.763287  | 2.113454  | 2.710856  |
| H  | 3.110256  | 0.965041  | 2.801302  |

56

Figure S13-1\_SIMes-Cu-allenyl / electronic energy: -2680.78923765 a.u. / lowest freq: 16.67 cm<sup>-1</sup>

|    |           |           |           |
|----|-----------|-----------|-----------|
| C  | 0.255100  | -2.802091 | 0.505112  |
| H  | 0.668208  | -3.196427 | 1.444813  |
| C  | -1.270500 | -2.619391 | 0.554864  |
| H  | -1.800083 | -3.253354 | -0.170485 |
| C  | -0.267703 | -0.553149 | 0.091367  |
| C  | -2.705673 | -0.570588 | 0.110299  |
| C  | -3.379878 | -0.614762 | -1.117966 |
| C  | -3.248840 | 0.082482  | 1.227243  |
| C  | -4.637370 | -0.011781 | -1.202344 |
| C  | -4.506955 | 0.673704  | 1.096602  |
| C  | -5.220520 | 0.629249  | -0.105733 |
| Cu | 0.110016  | 1.307604  | -0.228361 |
| N  | 0.723169  | -1.433012 | 0.264097  |
| N  | -1.429749 | -1.197347 | 0.221108  |
| H  | -1.690544 | -2.824163 | 1.551562  |
| H  | 0.576639  | -3.468534 | -0.309931 |
| C  | 0.774672  | 3.096038  | -0.486998 |
| H  | 0.208773  | 4.016056  | -0.700711 |
| C  | 2.071525  | 3.214162  | -0.388898 |
| C  | 3.389142  | 3.271273  | -0.276397 |
| H  | 4.042154  | 3.124597  | -1.143427 |
| H  | 3.872005  | 3.450329  | 0.690170  |
| H  | -4.940744 | 1.189169  | 1.958286  |
| H  | -5.171125 | -0.034945 | -2.156636 |
| C  | -2.739174 | -1.258856 | -2.318184 |
| H  | -1.764393 | -0.794441 | -2.533026 |
| H  | -2.557008 | -2.332599 | -2.157552 |

|   |           |           |           |
|---|-----------|-----------|-----------|
| H | -3.373859 | -1.155030 | -3.207828 |
| C | -2.466468 | 0.177007  | 2.509466  |
| H | -2.161688 | -0.814837 | 2.876499  |
| H | -1.543922 | 0.758395  | 2.352392  |
| H | -3.052793 | 0.668434  | 3.296712  |
| C | 2.100609  | -1.074402 | 0.152530  |
| C | 2.710868  | -1.089540 | -1.109969 |
| C | 2.796150  | -0.676303 | 1.303159  |
| C | 4.054490  | -0.718966 | -1.196317 |
| C | 4.137867  | -0.315360 | 1.170431  |
| C | 4.783410  | -0.329256 | -0.069282 |
| H | 4.541691  | -0.721123 | -2.175444 |
| H | 4.690272  | 0.002663  | 2.059240  |
| C | 1.914463  | -1.435151 | -2.339256 |
| H | 1.411113  | -2.409070 | -2.245646 |
| H | 1.129881  | -0.679297 | -2.505515 |
| H | 2.554756  | -1.464444 | -3.230551 |
| C | 2.087510  | -0.585650 | 2.627443  |
| H | 1.295980  | 0.179314  | 2.581836  |
| H | 1.603679  | -1.535221 | 2.901538  |
| H | 2.783525  | -0.310564 | 3.430477  |
| C | -6.591070 | 1.245868  | -0.208877 |
| H | -6.854724 | 1.465524  | -1.252764 |
| H | -7.356052 | 0.560144  | 0.189860  |
| H | -6.655115 | 2.179427  | 0.368353  |
| C | 6.214528  | 0.121736  | -0.194929 |
| H | 6.791322  | -0.109785 | 0.711774  |
| H | 6.712484  | -0.348829 | -1.054371 |
| H | 6.258068  | 1.212948  | -0.343793 |

62

Figure S13-1\_SIMes-Cu(NaOMe)-allenyl / electronic energy: -2958.10335257 a.u. / lowest freq: 26.87 cm<sup>-1</sup>

|    |           |           |           |
|----|-----------|-----------|-----------|
| C  | 1.491287  | -2.854838 | -0.612571 |
| H  | 2.057388  | -3.568609 | 0.002574  |
| C  | -0.023431 | -3.104601 | -0.566334 |
| H  | -0.429277 | -3.451467 | -1.528274 |
| C  | 0.415890  | -0.880695 | 0.077778  |
| C  | -1.919959 | -1.431945 | -0.249070 |
| C  | -2.472924 | -0.954826 | -1.447881 |
| C  | -2.681317 | -1.518549 | 0.927535  |
| C  | -3.826265 | -0.593993 | -1.453640 |
| C  | -4.021889 | -1.130531 | 0.880942  |
| C  | -4.615656 | -0.674885 | -0.301233 |
| Cu | -0.042716 | 0.947660  | 0.537790  |
| N  | 1.600626  | -1.490844 | -0.080800 |
| N  | -0.539013 | -1.777234 | -0.221584 |
| H  | -0.304569 | -3.841693 | 0.202777  |
| H  | 1.895857  | -2.897564 | -1.637142 |
| C  | -0.732595 | 2.021360  | 2.081781  |
| H  | -0.170218 | 2.178112  | 3.015913  |
| C  | -1.955323 | 2.456236  | 2.070462  |
| C  | -3.225569 | 2.851533  | 1.938962  |
| H  | -4.057349 | 2.205516  | 2.244183  |
| H  | -3.475501 | 3.870546  | 1.619747  |
| H  | -4.618672 | -1.178907 | 1.796191  |
| H  | -4.270866 | -0.225950 | -2.383480 |
| C  | -1.603476 | -0.732191 | -2.655001 |
| H  | -0.948780 | 0.136992  | -2.460124 |
| H  | -0.959191 | -1.597021 | -2.868565 |
| H  | -2.210704 | -0.524945 | -3.546837 |
| C  | -2.036311 | -1.949774 | 2.215139  |
| H  | -1.525119 | -2.918028 | 2.109014  |
| H  | -1.277419 | -1.209487 | 2.513676  |
| H  | -2.777162 | -2.035106 | 3.020783  |
| C  | 2.838621  | -0.786557 | -0.048737 |
| C  | 3.174588  | 0.050575  | -1.127422 |
| C  | 3.687687  | -0.939460 | 1.055272  |
| C  | 4.393720  | 0.728969  | -1.075556 |
| C  | 4.901683  | -0.245613 | 1.060195  |
| C  | 5.271183  | 0.592817  | 0.005789  |
| H  | 4.668200  | 1.386011  | -1.906320 |
| H  | 5.571510  | -0.356554 | 1.917870  |
| C  | 2.228390  | 0.233585  | -2.283605 |
| H  | 1.895638  | -0.733797 | -2.690944 |
| H  | 1.320353  | 0.775393  | -1.961182 |
| H  | 2.708030  | 0.797740  | -3.095104 |
| C  | 3.275430  | -1.800431 | 2.219340  |
| H  | 2.302945  | -1.472002 | 2.617145  |
| H  | 3.163971  | -2.856467 | 1.928078  |
| H  | 4.016324  | -1.751822 | 3.028280  |
| C  | -6.071727 | -0.289871 | -0.326705 |
| H  | -6.317753 | 0.303128  | -1.218640 |
| H  | -6.711142 | -1.186932 | -0.336587 |
| H  | -6.344672 | 0.294120  | 0.564521  |
| C  | 6.568354  | 1.358964  | 0.036023  |
| H  | 7.242637  | 0.982957  | 0.817988  |
| H  | 7.091289  | 1.294451  | -0.929686 |
| H  | 6.386027  | 2.426852  | 0.236044  |
| O  | -0.436925 | 2.012250  | -1.223160 |
| C  | 0.285590  | 3.176770  | -1.324220 |

|    |           |          |           |
|----|-----------|----------|-----------|
| Na | -2.568931 | 2.027829 | -0.660984 |
| H  | -0.042972 | 3.825511 | -2.171476 |
| H  | 1.377184  | 3.007058 | -1.494610 |
| H  | 0.229234  | 3.819942 | -0.412386 |

94

Figure S13-1\_PA-SIMes(NaOMe)-ed(1,6) / electronic energy: -3800.05935298 a.u. / lowest freq: 16.09 cm-1

|    |           |           |           |
|----|-----------|-----------|-----------|
| C  | 1.934056  | -0.183601 | 3.659131  |
| H  | 2.729263  | 0.565910  | 3.796633  |
| C  | 0.532447  | 0.374851  | 3.951149  |
| H  | -0.039452 | -0.264934 | 4.639882  |
| C  | 0.678834  | -0.196976 | 1.684343  |
| C  | -1.349723 | 0.973380  | 2.336149  |
| C  | -1.362200 | 2.304551  | 1.885082  |
| C  | -2.534935 | 0.245119  | 2.511015  |
| C  | -3.794010 | 2.186480  | 1.725406  |
| Cu | -0.035108 | -0.770598 | -0.063183 |
| N  | 1.835482  | -0.559348 | 2.242547  |
| N  | -0.088252 | 0.369543  | 2.620774  |
| C  | -0.848110 | -0.607184 | -1.902430 |
| C  | 0.252774  | 0.307180  | -1.852041 |
| H  | 0.552996  | 1.391374  | 4.370192  |
| H  | 2.180011  | -1.058834 | 4.276700  |
| H  | -0.659591 | -1.544486 | -2.428092 |
| C  | 0.147433  | 1.777332  | -1.728513 |
| C  | 1.563894  | -0.219544 | -2.321458 |
| O  | -1.104193 | 2.222237  | -1.671046 |
| O  | 1.090032  | 2.549424  | -1.693999 |
| O  | 2.508276  | 0.431993  | -2.719829 |
| O  | 1.613548  | -1.549927 | -2.268064 |
| C  | 2.814735  | -2.177113 | -2.699022 |
| H  | 2.992584  | -1.980424 | -3.765260 |
| H  | 2.669290  | -3.248819 | -2.529958 |
| H  | 3.665729  | -1.811515 | -2.110927 |
| C  | -1.303252 | 3.627892  | -1.623786 |
| H  | -0.781574 | 4.071680  | -0.766586 |
| H  | -2.383825 | 3.774128  | -1.524631 |
| H  | -0.940250 | 4.098455  | -2.547952 |
| C  | -2.245190 | -0.322001 | -1.631468 |
| H  | -2.490331 | 0.592025  | -1.091119 |
| C  | -3.219578 | -1.183225 | -1.995474 |
| H  | -2.936264 | -2.082945 | -2.550490 |
| C  | -4.659272 | -1.012547 | -1.762745 |
| C  | -5.552231 | -1.967366 | -2.274956 |
| C  | -5.189746 | 0.075757  | -1.049720 |
| C  | -6.926453 | -1.843410 | -2.082770 |
| H  | -5.157501 | -2.822788 | -2.829420 |
| C  | -6.561640 | 0.201271  | -0.858032 |
| H  | -4.520019 | 0.828739  | -0.631453 |
| C  | -7.437547 | -0.757200 | -1.372967 |
| H  | -7.602218 | -2.599376 | -2.488761 |
| H  | -6.952985 | 1.055785  | -0.301869 |
| H  | -8.514045 | -0.655225 | -1.220359 |
| C  | -0.623895 | -2.644879 | 0.235413  |
| H  | 0.209647  | -3.297647 | 0.535778  |
| C  | -1.816828 | -3.146162 | 0.167413  |
| C  | -3.068170 | -3.567981 | 0.095391  |
| H  | -3.476415 | -4.000237 | -0.823476 |
| H  | -3.735577 | -3.514483 | 0.962314  |
| C  | -2.592627 | 2.889568  | 1.586610  |
| H  | -2.617219 | 3.927980  | 1.243878  |
| C  | -3.744032 | 0.869777  | 2.187634  |
| H  | -4.675058 | 0.308714  | 2.305628  |
| C  | -0.078804 | 3.075992  | 1.734049  |
| H  | 0.566702  | 2.971189  | 2.617978  |
| H  | 0.507298  | 2.720103  | 0.873488  |
| H  | -0.277963 | 4.146052  | 1.587647  |
| C  | -2.508906 | -1.158113 | 3.050603  |
| H  | -1.780390 | -1.776749 | 2.508245  |
| H  | -2.234630 | -1.164597 | 4.117702  |
| H  | -3.495686 | -1.630258 | 2.957235  |
| C  | 2.970913  | -0.975893 | 1.484384  |
| C  | 3.373412  | -2.317479 | 1.496040  |
| C  | 3.674665  | -0.001716 | 0.756519  |
| C  | 4.504201  | -2.667582 | 0.749235  |
| C  | 4.788588  | -0.394007 | 0.012794  |
| C  | 5.220661  | -1.725411 | 0.005951  |
| H  | 5.298680  | 0.379403  | -0.575767 |
| C  | 2.633713  | -3.348698 | 2.305991  |
| H  | 2.725429  | -4.344927 | 1.851834  |
| H  | 3.044415  | -3.414862 | 3.326887  |
| H  | 1.566607  | -3.103150 | 2.395847  |
| C  | 3.245262  | 1.439858  | 0.763304  |
| H  | 2.293332  | 1.560278  | 0.223613  |
| H  | 3.078392  | 1.815085  | 1.784433  |
| H  | 4.014734  | 2.050981  | 0.263713  |
| C  | -5.104016 | 2.846582  | 1.383237  |
| H  | -5.194560 | 3.826690  | 1.874528  |
| H  | -5.187834 | 3.021553  | 0.298344  |
| H  | -5.958394 | 2.229059  | 1.692812  |

|    |          |           |           |
|----|----------|-----------|-----------|
| C  | 6.414468 | -2.131731 | -0.818409 |
| H  | 6.858533 | -3.069157 | -0.454956 |
| H  | 6.128787 | -2.286716 | -1.871976 |
| H  | 7.188215 | -1.351039 | -0.806655 |
| H  | 4.830708 | -3.711987 | 0.748685  |
| Na | 3.395075 | 2.467038  | -2.175137 |
| O  | 5.346217 | 2.527464  | -1.421682 |
| C  | 6.624300 | 2.715199  | -1.022869 |
| H  | 7.012996 | 1.908781  | -0.337946 |
| H  | 6.807666 | 3.665946  | -0.451399 |
| H  | 7.381261 | 2.748461  | -1.853508 |

94

Figure S13-1\_PA-SIMes(NaOMe)-ts(1,6) / electronic energy: -3800.04969158 a.u. / lowest freq: -424.88 cm<sup>-1</sup>

|    |           |           |           |
|----|-----------|-----------|-----------|
| C  | 1.985245  | 3.661962  | 0.081206  |
| H  | 2.756814  | 3.759451  | -0.698557 |
| C  | 0.573584  | 3.981123  | -0.433088 |
| H  | 0.043804  | 4.700051  | 0.209898  |
| C  | 0.680909  | 1.719863  | 0.176828  |
| C  | -1.371814 | 2.414493  | -0.925266 |
| C  | -1.444384 | 1.874523  | -2.221117 |
| C  | -2.524900 | 2.707909  | -0.185502 |
| C  | -3.876827 | 1.880091  | -2.045914 |
| Cu | -0.035495 | -0.027375 | 0.743979  |
| N  | 1.862281  | 2.256421  | 0.491723  |
| N  | -0.081515 | 2.669075  | -0.374583 |
| C  | -0.865777 | -1.920987 | 0.645066  |
| C  | 0.274137  | -1.914019 | -0.252351 |
| H  | 0.567942  | 4.374537  | -1.459957 |
| H  | 2.280965  | 4.290993  | 0.932720  |
| H  | -0.675557 | -2.404616 | 1.606254  |
| C  | 0.176969  | -1.860068 | -1.711736 |
| C  | 1.565263  | -2.328673 | 0.321210  |
| O  | -1.073368 | -1.694300 | -2.157027 |
| O  | 1.105229  | -1.954703 | -2.502448 |
| O  | 2.553972  | -2.709313 | -0.280291 |
| O  | 1.575552  | -2.240190 | 1.660180  |
| C  | 2.773915  | -2.610398 | 2.324836  |
| H  | 3.006258  | -3.670115 | 2.148922  |
| H  | 2.592736  | -2.436466 | 3.390831  |
| H  | 3.611313  | -1.991422 | 1.978085  |
| C  | -1.280953 | -1.730177 | -3.558754 |
| H  | -0.668005 | -0.977566 | -4.071118 |
| H  | -2.344894 | -1.518358 | -3.710781 |
| H  | -1.035388 | -2.722424 | -3.963311 |
| C  | -2.209817 | -1.584635 | 0.398431  |
| H  | -2.483387 | -1.089145 | -0.532806 |
| C  | -3.183609 | -1.833260 | 1.366853  |
| H  | -2.917501 | -2.562469 | 2.135323  |
| C  | -4.634713 | -1.737480 | 1.094819  |
| C  | -5.525874 | -2.528394 | 1.834572  |
| C  | -5.160485 | -0.869597 | 0.125162  |
| C  | -6.899914 | -2.463773 | 1.608850  |
| H  | -5.133907 | -3.207550 | 2.596632  |
| C  | -6.532871 | -0.803059 | -0.098983 |
| H  | -4.489123 | -0.225221 | -0.445799 |
| C  | -7.409640 | -1.599663 | 0.640608  |
| H  | -7.574841 | -3.091815 | 2.194668  |
| H  | -6.923509 | -0.118729 | -0.855111 |
| H  | -8.485807 | -1.542970 | 0.463646  |
| C  | -0.683549 | 0.493448  | 2.620952  |
| H  | 0.075391  | 1.123116  | 3.085167  |
| C  | -1.861839 | 0.178934  | 2.956443  |
| C  | -3.135897 | -0.285908 | 2.994387  |
| H  | -3.420943 | -1.028861 | 3.743728  |
| H  | -3.937620 | 0.379713  | 2.658026  |
| C  | -2.703246 | 1.610423  | -2.758665 |
| H  | -2.773023 | 1.190743  | -3.766386 |
| C  | -3.766514 | 2.427677  | -0.766327 |
| H  | -4.675018 | 2.643395  | -0.196918 |
| C  | -0.190224 | 1.593263  | -3.002393 |
| H  | 0.503516  | 2.446355  | -2.980091 |
| H  | 0.355771  | 0.734903  | -2.583910 |
| H  | -0.421128 | 1.373512  | -4.052893 |
| C  | -2.435705 | 3.331626  | 1.180340  |
| H  | -1.610064 | 2.900998  | 1.761924  |
| H  | -2.268237 | 4.418243  | 1.103026  |
| H  | -3.367231 | 3.179698  | 1.741826  |
| C  | 2.996731  | 1.492233  | 0.900831  |
| C  | 3.448971  | 1.558139  | 2.224795  |
| C  | 3.660197  | 0.716081  | -0.065403 |
| C  | 4.584414  | 0.814582  | 2.567578  |
| C  | 4.781523  | -0.019623 | 0.318987  |
| C  | 5.259604  | 0.024491  | 1.634049  |
| H  | 5.261998  | -0.641257 | -0.448224 |
| C  | 2.762731  | 2.420867  | 3.250733  |
| H  | 2.763807  | 1.936108  | 4.237001  |
| H  | 3.279445  | 3.388047  | 3.360776  |
| H  | 1.722588  | 2.636649  | 2.970741  |
| C  | 3.182468  | 0.662699  | -1.490470 |

|    |           |           |           |
|----|-----------|-----------|-----------|
| H  | 2.236468  | 0.103974  | -1.558367 |
| H  | 2.987334  | 1.666308  | -1.898025 |
| H  | 3.939651  | 0.151616  | -2.106856 |
| C  | -5.220620 | 1.579498  | -2.655901 |
| H  | -5.322949 | 2.055321  | -3.642709 |
| H  | -5.351758 | 0.495780  | -2.804730 |
| H  | -6.041081 | 1.937259  | -2.018648 |
| C  | 6.459555  | -0.794975 | 2.031435  |
| H  | 6.912956  | -0.426827 | 2.962525  |
| H  | 6.177181  | -1.848501 | 2.191648  |
| H  | 7.225007  | -0.784417 | 1.242364  |
| H  | 4.948454  | 0.856817  | 3.598662  |
| Na | 3.398465  | -2.326545 | -2.356279 |
| O  | 5.321253  | -1.514848 | -2.542411 |
| C  | 6.577919  | -1.074029 | -2.773260 |
| H  | 6.966147  | -0.365625 | -1.986786 |
| H  | 6.712788  | -0.508236 | -3.735630 |
| H  | 7.362628  | -1.878013 | -2.820153 |

94

Figure S13-1\_PA-SIMes(NaOMe)-prod(1,6) / electronic energy: -3800.10311238 a.u. / lowest freq: 6.39 cm-1

|    |           |           |           |
|----|-----------|-----------|-----------|
| C  | -1.498233 | 3.784527  | 0.685135  |
| H  | -2.227490 | 3.868246  | 1.503492  |
| C  | -0.047537 | 3.967690  | 1.152390  |
| H  | 0.436019  | 4.845655  | 0.702489  |
| C  | -0.278206 | 1.854946  | 0.163512  |
| C  | 1.971136  | 2.458174  | 0.905898  |
| C  | 2.350076  | 1.624777  | 1.969815  |
| C  | 2.922175  | 3.049256  | 0.058872  |
| C  | 4.688544  | 1.963197  | 1.349225  |
| Cu | 0.134590  | 0.084473  | -0.498513 |
| N  | -1.485993 | 2.417955  | 0.150072  |
| N  | 0.588454  | 2.726158  | 0.692247  |
| C  | 0.431530  | -1.900104 | -0.994857 |
| C  | -0.811490 | -2.112708 | -0.250860 |
| H  | 0.042025  | 4.053439  | 2.246302  |
| H  | -1.784381 | 4.499538  | -0.100724 |
| H  | 0.311001  | -2.042457 | -2.073316 |
| C  | -0.866999 | -2.371422 | 1.171180  |
| C  | -2.036693 | -2.241835 | -1.022926 |
| O  | 0.328814  | -2.230740 | 1.784055  |
| O  | -1.847769 | -2.680651 | 1.838065  |
| O  | -3.136836 | -2.603886 | -0.625585 |
| O  | -1.875143 | -1.903946 | -2.320768 |
| C  | -3.012432 | -1.997243 | -3.157948 |
| H  | -3.438226 | -3.010464 | -3.142407 |
| H  | -2.666074 | -1.753550 | -4.168865 |
| H  | -3.783354 | -1.279225 | -2.846189 |
| C  | 0.374995  | -2.491356 | 3.175218  |
| H  | -0.294597 | -1.817515 | 3.728786  |
| H  | 1.413844  | -2.319341 | 3.479367  |
| H  | 0.089243  | -3.530447 | 3.392082  |
| C  | 1.689035  | -1.523466 | -0.587966 |
| H  | 1.938287  | -1.453693 | 0.472362  |
| C  | 2.835611  | -1.413043 | -1.573818 |
| H  | 2.563306  | -1.966902 | -2.485730 |
| C  | 4.105473  | -2.030090 | -1.017046 |
| C  | 4.719438  | -3.112061 | -1.654845 |
| C  | 4.690322  | -1.522843 | 0.150488  |
| C  | 5.889004  | -3.675385 | -1.140952 |
| H  | 4.274864  | -3.522970 | -2.565318 |
| C  | 5.857929  | -2.081224 | 0.665989  |
| H  | 4.226522  | -0.678595 | 0.666553  |
| C  | 6.462679  | -3.161352 | 0.020881  |
| H  | 6.352270  | -4.522544 | -1.651879 |
| H  | 6.297755  | -1.670462 | 1.577869  |
| H  | 7.376751  | -3.601980 | 0.424869  |
| C  | 0.986496  | 1.063932  | -3.291277 |
| H  | 0.132299  | 1.449812  | -3.817540 |
| C  | 1.957861  | 0.635130  | -2.707697 |
| C  | 3.101682  | 0.053048  | -2.008390 |
| H  | 3.983605  | 0.085195  | -2.668220 |
| H  | 3.338895  | 0.670118  | -1.126731 |
| C  | 3.713110  | 1.391481  | 2.170926  |
| H  | 4.020958  | 0.741761  | 2.995131  |
| C  | 4.272800  | 2.789479  | 0.300959  |
| H  | 5.022456  | 3.233473  | -0.360224 |
| C  | 1.315736  | 0.982628  | 2.853700  |
| H  | 0.552676  | 1.704541  | 3.179224  |
| H  | 0.789677  | 0.180196  | 2.313079  |
| H  | 1.778888  | 0.541254  | 3.745827  |
| C  | 2.498828  | 3.919548  | -1.093495 |
| H  | 1.603305  | 3.513702  | -1.584446 |
| H  | 2.264881  | 4.943116  | -0.758603 |
| H  | 3.298727  | 3.993273  | -1.842088 |
| C  | -2.669012 | 1.778728  | -0.328490 |
| C  | -3.097540 | 2.013334  | -1.641558 |
| C  | -3.388041 | 0.947929  | 0.546610  |
| C  | -4.277655 | 1.393088  | -2.066969 |
| C  | -4.565290 | 0.358233  | 0.087204  |



|    |           |           |           |
|----|-----------|-----------|-----------|
| C  | -5.021554 | 0.570414  | -1.218483 |
| H  | -5.114811 | -0.295057 | 0.783607  |
| C  | -2.324323 | 2.919011  | -2.563183 |
| H  | -2.527638 | 2.678591  | -3.615850 |
| H  | -2.601954 | 3.974586  | -2.409579 |
| H  | -1.242048 | 2.840076  | -2.389461 |
| C  | -2.901820 | 0.680629  | 1.946318  |
| H  | -1.925770 | 0.170861  | 1.926091  |
| H  | -2.764430 | 1.614923  | 2.513362  |
| H  | -3.626658 | 0.038838  | 2.469827  |
| C  | 6.150178  | 1.665879  | 1.553689  |
| H  | 6.759153  | 2.577959  | 1.472948  |
| H  | 6.335586  | 1.210798  | 2.536459  |
| H  | 6.509778  | 0.961846  | 0.785969  |
| C  | -6.274612 | -0.117531 | -1.692686 |
| H  | -6.623519 | 0.282416  | -2.655225 |
| H  | -6.096033 | -1.197924 | -1.817877 |
| H  | -7.085104 | -0.011811 | -0.956618 |
| H  | -4.620478 | 1.560423  | -3.092556 |
| Na | -4.078997 | -2.597833 | 1.448060  |
| O  | -5.522684 | -1.460232 | 2.435143  |
| C  | -6.458271 | -0.659517 | 2.989935  |
| H  | -6.568926 | 0.337944  | 2.474552  |
| H  | -6.271957 | -0.388628 | 4.065077  |
| H  | -7.501323 | -1.078995 | 2.991831  |

79

Figure S13-1\_PA-PPh3(NaOMe)-prod(1,4) / electronic energy: -3911.12006641 a.u. / lowest freq: 12.79 cm-1

|    |           |           |           |
|----|-----------|-----------|-----------|
| Cu | -1.049738 | -1.389978 | -0.560504 |
| C  | 1.748016  | -0.530199 | -0.831180 |
| C  | 1.157778  | -1.568519 | 0.127685  |
| H  | 1.308885  | 0.429379  | -0.542788 |
| C  | 1.347179  | -2.978837 | -0.125447 |
| C  | 0.917035  | -1.184365 | 1.500560  |
| O  | 2.048428  | -3.211709 | -1.259866 |
| O  | 0.950516  | -3.935766 | 0.538210  |
| O  | 0.531302  | -1.900916 | 2.424695  |
| O  | 1.170322  | 0.123910  | 1.748536  |
| C  | 1.006683  | 0.568949  | 3.082356  |
| H  | -0.020151 | 0.407619  | 3.437714  |
| H  | 1.230112  | 1.642867  | 3.074038  |
| H  | 1.704152  | 0.051985  | 3.757248  |
| C  | 2.138980  | -4.551665 | -1.698164 |
| H  | 2.686825  | -5.174365 | -0.976361 |
| H  | 2.680858  | -4.526140 | -2.650883 |
| H  | 1.139956  | -4.986455 | -1.850947 |
| C  | 3.240741  | -0.385875 | -0.703030 |
| H  | 3.822615  | -1.294134 | -0.897350 |
| C  | 3.840539  | 0.761299  | -0.360573 |
| H  | 3.202563  | 1.635520  | -0.184993 |
| C  | 5.284573  | 1.001252  | -0.184958 |
| C  | 5.726102  | 2.305022  | 0.091191  |
| C  | 6.250902  | -0.014976 | -0.278844 |
| C  | 7.079801  | 2.589120  | 0.264068  |
| H  | 4.989364  | 3.109316  | 0.170104  |
| C  | 7.603030  | 0.266382  | -0.106297 |
| H  | 5.943175  | -1.042677 | -0.483354 |
| C  | 8.025734  | 1.569957  | 0.165392  |
| H  | 7.396057  | 3.612917  | 0.476880  |
| H  | 8.336423  | -0.539841 | -0.181518 |
| H  | 9.087405  | 1.786481  | 0.302456  |
| C  | -0.965876 | -2.027257 | -2.716378 |
| H  | -1.806102 | -2.617560 | -3.041696 |
| C  | 0.051425  | -1.382991 | -2.500156 |
| C  | 1.354746  | -0.730529 | -2.324018 |
| H  | 1.343421  | 0.251432  | -2.822321 |
| H  | 2.099346  | -1.350521 | -2.843541 |
| Na | -0.880493 | -3.606688 | 1.849262  |
| O  | -2.235575 | -2.684295 | 0.381024  |
| C  | -3.560627 | -2.711729 | 0.012567  |
| P  | -1.850184 | 0.770115  | -0.165156 |
| C  | -3.514797 | 0.941098  | -0.921792 |
| C  | -3.722696 | 0.354566  | -2.176811 |
| C  | -4.570821 | 1.620219  | -0.303102 |
| C  | -4.960131 | 0.458220  | -2.810170 |
| H  | -2.905808 | -0.185853 | -2.661287 |
| C  | -5.811727 | 1.713470  | -0.931791 |
| H  | -4.428236 | 2.076558  | 0.678932  |
| C  | -6.008068 | 1.134914  | -2.186224 |
| H  | -5.108464 | -0.000407 | -3.790158 |
| H  | -6.631036 | 2.240641  | -0.437995 |
| H  | -6.981062 | 1.209658  | -2.676715 |
| C  | -1.000121 | 2.308758  | -0.704658 |
| C  | 0.214352  | 2.654975  | -0.091141 |
| C  | -1.475448 | 3.106034  | -1.752678 |
| C  | 0.931101  | 3.771541  | -0.512520 |
| H  | 0.604414  | 2.037005  | 0.719432  |
| C  | -0.750731 | 4.220963  | -2.178951 |
| H  | -2.419754 | 2.862936  | -2.244139 |
| C  | 0.452250  | 4.557720  | -1.561842 |

|   |           |           |           |
|---|-----------|-----------|-----------|
| H | 1.872126  | 4.026698  | -0.019505 |
| H | -1.135734 | 4.831490  | -2.998688 |
| H | 1.015488  | 5.431583  | -1.896288 |
| C | -2.172317 | 1.028388  | 1.619201  |
| C | -2.134066 | 2.274337  | 2.255013  |
| C | -2.492642 | -0.117897 | 2.360440  |
| C | -2.409678 | 2.373598  | 3.618541  |
| H | -1.883005 | 3.173566  | 1.687763  |
| C | -2.782804 | -0.010709 | 3.719851  |
| H | -2.484719 | -1.095148 | 1.860518  |
| C | -2.737379 | 1.232510  | 4.351804  |
| H | -2.370085 | 3.348159  | 4.109935  |
| H | -3.030789 | -0.907467 | 4.292411  |
| H | -2.951952 | 1.313638  | 5.419750  |
| H | -4.118729 | -3.541186 | 0.502704  |
| H | -3.721064 | -2.846342 | -1.083121 |
| H | -4.112063 | -1.776421 | 0.275399  |

79

Figure S13-1\_PA-PPh3(NaOMe)-ts(1,4) / electronic energy: -3911.05049032 a.u. / lowest freq: -356.71 cm<sup>-1</sup>

|    |           |           |           |
|----|-----------|-----------|-----------|
| Cu | -0.893475 | -0.846713 | -0.979551 |
| C  | 2.909614  | 0.404809  | 0.249052  |
| C  | 1.962121  | -0.538206 | 0.679023  |
| H  | 2.704750  | 1.420050  | 0.590042  |
| C  | 2.086347  | -1.972148 | 0.405497  |
| C  | 0.867815  | -0.094404 | 1.538619  |
| O  | 2.858133  | -2.232418 | -0.657250 |
| O  | 1.587075  | -2.884314 | 1.046194  |
| O  | 0.002738  | -0.798303 | 2.044269  |
| O  | 0.888779  | 1.223731  | 1.793614  |
| C  | -0.054069 | 1.713844  | 2.731376  |
| H  | -1.077021 | 1.426190  | 2.458152  |
| H  | 0.041759  | 2.805003  | 2.717633  |
| H  | 0.165037  | 1.327077  | 3.737693  |
| C  | 3.101538  | -3.597037 | -0.957311 |
| H  | 3.590177  | -4.104644 | -0.113234 |
| H  | 3.761427  | -3.602097 | -1.831863 |
| H  | 2.162044  | -4.115534 | -1.192026 |
| C  | 4.328520  | 0.139485  | 0.017306  |
| H  | 4.609372  | -0.866965 | -0.293096 |
| C  | 5.262802  | 1.088643  | 0.211240  |
| H  | 4.931846  | 2.085144  | 0.527292  |
| C  | 6.715669  | 0.935152  | 0.045798  |
| C  | 7.556877  | 2.003067  | 0.399025  |
| C  | 7.309241  | -0.236150 | -0.457824 |
| C  | 8.940266  | 1.906939  | 0.261076  |
| H  | 7.114617  | 2.923027  | 0.790429  |
| C  | 8.690050  | -0.332583 | -0.596602 |
| H  | 6.685676  | -1.082740 | -0.752342 |
| C  | 9.512970  | 0.737711  | -0.237342 |
| H  | 9.573755  | 2.750674  | 0.543867  |
| H  | 9.130042  | -1.250361 | -0.993062 |
| H  | 10.596354 | 0.658542  | -0.349866 |
| C  | 0.234312  | 0.015770  | -2.391043 |
| H  | -0.342802 | 0.019210  | -3.325041 |
| C  | 1.369661  | 0.575618  | -2.263428 |
| C  | 2.585896  | 1.079704  | -1.946109 |
| H  | 2.698224  | 2.148090  | -1.734549 |
| H  | 3.477771  | 0.568243  | -2.316547 |
| Na | -0.649900 | -2.906113 | 1.542614  |
| O  | -1.193400 | -2.757498 | -0.597112 |
| C  | -0.710516 | -3.669066 | -1.510510 |
| P  | -2.663290 | 0.370094  | -0.186034 |
| C  | -4.078614 | 0.249224  | -1.352879 |
| C  | -3.796741 | 0.450243  | -2.711608 |
| C  | -5.395101 | -0.020280 | -0.963156 |
| C  | -4.814066 | 0.395839  | -3.661051 |
| H  | -2.769316 | 0.652174  | -3.026593 |
| C  | -6.412213 | -0.082519 | -1.916791 |
| H  | -5.631951 | -0.186368 | 0.090144  |
| C  | -6.125420 | 0.127120  | -3.264843 |
| H  | -4.582024 | 0.557043  | -4.715963 |
| H  | -7.436346 | -0.294443 | -1.601655 |
| H  | -6.922905 | 0.077895  | -4.009356 |
| C  | -2.505526 | 2.183758  | 0.013868  |
| C  | -1.236092 | 2.747395  | -0.156221 |
| C  | -3.600501 | 3.020557  | 0.274042  |
| C  | -1.056658 | 4.126149  | -0.036504 |
| H  | -0.387002 | 2.098348  | -0.384826 |
| C  | -3.419236 | 4.395424  | 0.397617  |
| H  | -4.602442 | 2.594793  | 0.374847  |
| C  | -2.145300 | 4.949146  | 0.246186  |
| H  | -0.061986 | 4.557365  | -0.168845 |
| H  | -4.275407 | 5.040503  | 0.606594  |
| H  | -2.005183 | 6.028174  | 0.341581  |
| C  | -3.359783 | -0.276908 | 1.378331  |
| C  | -3.698794 | 0.487874  | 2.497122  |
| C  | -3.496057 | -1.673967 | 1.434401  |
| C  | -4.169748 | -0.132759 | 3.656714  |
| H  | -3.591104 | 1.574315  | 2.476875  |

|   |           |           |           |
|---|-----------|-----------|-----------|
| C | -3.980467 | -2.287752 | 2.586207  |
| H | -3.187565 | -2.274982 | 0.570310  |
| C | -4.316008 | -1.517363 | 3.703222  |
| H | -4.426038 | 0.474406  | 4.527745  |
| H | -4.091195 | -3.374383 | 2.617101  |
| H | -4.689618 | -1.998686 | 4.609565  |
| H | -0.458168 | -4.650341 | -1.043450 |
| H | 0.216605  | -3.332003 | -2.028024 |
| H | -1.435694 | -3.905776 | -2.323511 |

79

Figure S13-1\_PA-PPh3(NaOMe)-ed(1,4) / electronic energy: -3911.06860824 a.u. / lowest freq: 16.23 cm<sup>-1</sup>

|    |           |           |           |
|----|-----------|-----------|-----------|
| Cu | -0.336172 | -0.239591 | -1.529854 |
| C  | 2.183745  | -1.481701 | 1.297381  |
| C  | 1.095802  | -2.226865 | 0.954658  |
| H  | 2.131187  | -1.024828 | 2.289669  |
| C  | 0.914517  | -3.004417 | -0.299676 |
| C  | -0.074543 | -2.201962 | 1.873765  |
| O  | 1.829036  | -2.771368 | -1.223352 |
| O  | 0.010920  | -3.801179 | -0.465071 |
| O  | -1.231177 | -2.338343 | 1.524607  |
| O  | 0.253243  | -1.946347 | 3.132856  |
| C  | -0.808793 | -1.678281 | 4.040825  |
| H  | -1.330732 | -0.755484 | 3.748988  |
| H  | -0.341522 | -1.546862 | 5.021807  |
| H  | -1.521468 | -2.513209 | 4.065073  |
| C  | 1.552362  | -3.270857 | -2.531121 |
| H  | 1.536934  | -4.369298 | -2.533675 |
| H  | 2.362748  | -2.901726 | -3.168232 |
| H  | 0.579023  | -2.871405 | -2.854500 |
| C  | 3.359284  | -1.140832 | 0.540904  |
| H  | 3.462287  | -1.527752 | -0.469795 |
| C  | 4.270093  | -0.295996 | 1.074189  |
| H  | 4.113843  | 0.052661  | 2.101894  |
| C  | 5.460912  | 0.232806  | 0.407965  |
| C  | 6.392088  | 0.966875  | 1.160066  |
| C  | 5.695944  | 0.055874  | -0.966860 |
| C  | 7.533492  | 1.497177  | 0.563678  |
| H  | 6.214797  | 1.122416  | 2.227328  |
| C  | 6.834883  | 0.586289  | -1.561836 |
| H  | 4.970428  | -0.481673 | -1.579888 |
| C  | 7.758282  | 1.306242  | -0.799221 |
| H  | 8.246903  | 2.065577  | 1.163916  |
| H  | 7.001549  | 0.445739  | -2.631743 |
| H  | 8.649559  | 1.725116  | -1.271328 |
| C  | 1.488595  | 0.372357  | -2.001547 |
| H  | 2.089882  | -0.134372 | -2.776024 |
| C  | 2.081650  | 1.356842  | -1.389693 |
| C  | 2.616856  | 2.362955  | -0.709641 |
| H  | 2.527188  | 3.400782  | -1.049135 |
| H  | 3.180715  | 2.183381  | 0.213432  |
| Na | -2.134761 | -2.788501 | -0.614928 |
| O  | -1.430326 | -1.710631 | -2.373667 |
| C  | -1.775372 | -1.492660 | -3.684126 |
| P  | -1.799120 | 0.783837  | -0.085031 |
| C  | -2.269543 | 2.422929  | -0.774381 |
| C  | -1.263752 | 3.134321  | -1.442572 |
| C  | -3.534947 | 3.002587  | -0.620517 |
| C  | -1.520429 | 4.410139  | -1.943368 |
| H  | -0.275198 | 2.681665  | -1.567167 |
| C  | -3.790461 | 4.274881  | -1.130426 |
| H  | -4.330364 | 2.457833  | -0.105611 |
| C  | -2.783740 | 4.980976  | -1.790843 |
| H  | -0.729192 | 4.956669  | -2.461340 |
| H  | -4.781148 | 4.718758  | -1.008897 |
| H  | -2.986156 | 5.977239  | -2.190436 |
| C  | -1.252904 | 1.259535  | 1.599966  |
| C  | 0.121059  | 1.187905  | 1.853175  |
| C  | -2.106934 | 1.765591  | 2.590505  |
| C  | 0.632848  | 1.582862  | 3.090086  |
| H  | 0.790521  | 0.838717  | 1.062198  |
| C  | -1.595894 | 2.153139  | 3.826822  |
| H  | -3.177727 | 1.865036  | 2.396426  |
| C  | -0.225118 | 2.055716  | 4.080589  |
| H  | 1.707614  | 1.523418  | 3.275993  |
| H  | -2.269269 | 2.539355  | 4.595033  |
| H  | 0.173727  | 2.361222  | 5.050419  |
| C  | -3.404290 | -0.080204 | 0.104806  |
| C  | -3.841652 | -0.693331 | 1.284968  |
| C  | -4.143478 | -0.281144 | -1.073584 |
| C  | -5.001943 | -1.470603 | 1.292779  |
| H  | -3.264174 | -0.589900 | 2.203603  |
| C  | -5.304154 | -1.049696 | -1.063308 |
| H  | -3.797315 | 0.159125  | -2.012116 |
| C  | -5.738386 | -1.647204 | 0.122582  |
| H  | -5.328431 | -1.941219 | 2.222638  |
| H  | -5.866403 | -1.191170 | -1.988724 |
| H  | -6.646895 | -2.253398 | 0.131135  |
| H  | -2.459794 | -2.277521 | -4.082990 |
| H  | -0.900036 | -1.476896 | -4.378316 |

H -2.304953 -0.524448 -3.859097

41

Figure S13-1\_PPh3-Cu-allenyl / electronic energy: -2791.78064609 a.u. / lowest freq: -8.52 cm-1

|    |           |           |           |
|----|-----------|-----------|-----------|
| Cu | 1.925957  | 0.441034  | -0.969324 |
| C  | 3.695423  | 0.782212  | -1.650311 |
| H  | 3.901621  | 1.250294  | -2.626132 |
| C  | 4.739409  | 0.464057  | -0.934464 |
| C  | 5.764894  | 0.124180  | -0.171645 |
| H  | 6.228054  | -0.865398 | -0.246897 |
| H  | 6.190086  | 0.825011  | 0.554818  |
| P  | -0.093017 | 0.040978  | -0.106258 |
| C  | -0.713342 | 1.391986  | 0.957863  |
| C  | -1.380331 | 1.168166  | 2.166791  |
| C  | -0.511650 | 2.705927  | 0.513218  |
| C  | -1.849259 | 2.247854  | 2.915852  |
| H  | -1.535294 | 0.149778  | 2.529631  |
| C  | -0.989950 | 3.780817  | 1.258089  |
| H  | 0.022539  | 2.889678  | -0.423318 |
| C  | -1.658731 | 3.552160  | 2.461671  |
| H  | -2.365753 | 2.066564  | 3.860640  |
| H  | -0.832329 | 4.800736  | 0.901689  |
| H  | -2.027713 | 4.394962  | 3.049984  |
| C  | -0.164393 | -1.456811 | 0.937848  |
| C  | -1.315396 | -2.246691 | 1.042854  |
| C  | 0.979917  | -1.802657 | 1.668371  |
| C  | -1.322993 | -3.362695 | 1.878346  |
| H  | -2.210179 | -1.992779 | 0.469631  |
| C  | 0.967011  | -2.915256 | 2.507351  |
| H  | 1.889455  | -1.202122 | 1.577400  |
| C  | -0.184532 | -3.695898 | 2.612619  |
| H  | -2.223689 | -3.975283 | 1.954422  |
| H  | 1.863220  | -3.177711 | 3.073131  |
| H  | -0.192646 | -4.571265 | 3.265682  |
| C  | -1.410845 | -0.201190 | -1.350523 |
| C  | -2.710237 | 0.290159  | -1.183020 |
| C  | -1.089521 | -0.925749 | -2.506174 |
| C  | -3.679067 | 0.050420  | -2.157376 |
| H  | -2.969562 | 0.864064  | -0.290291 |
| C  | -2.061407 | -1.169847 | -3.473746 |
| H  | -0.072030 | -1.299724 | -2.651497 |
| C  | -3.357069 | -0.680980 | -3.300219 |
| H  | -4.690190 | 0.439664  | -2.021497 |
| H  | -1.803574 | -1.735870 | -4.371205 |
| H  | -4.117079 | -0.866243 | -4.062285 |

47

Figure S13-1\_PPh3-Cu(NaOMe)-allenyl / electronic energy: -3069.10617160 a.u. / lowest freq: 20.67 cm-1

|    |           |           |           |
|----|-----------|-----------|-----------|
| O  | -2.507715 | -1.614477 | -0.117319 |
| C  | -1.791502 | -2.691059 | -0.588600 |
| Na | -4.570078 | -0.950440 | 0.015508  |
| Cu | -1.747352 | 0.240623  | -0.324777 |
| C  | -2.934205 | 1.822009  | -0.588788 |
| H  | -2.493566 | 2.799687  | -0.845319 |
| C  | -4.226582 | 1.809945  | -0.460645 |
| C  | -5.546103 | 1.685346  | -0.309565 |
| H  | -6.029401 | 1.872223  | 0.656057  |
| H  | -6.199853 | 1.483996  | -1.165999 |
| P  | 0.500749  | 0.132935  | -0.046191 |
| C  | 1.409747  | -1.024413 | -1.140897 |
| C  | 2.295589  | -2.003003 | -0.678527 |
| C  | 1.156627  | -0.928767 | -2.516933 |
| C  | 2.923888  | -2.865528 | -1.578263 |
| H  | 2.494887  | -2.100221 | 0.390797  |
| C  | 1.792140  | -1.782752 | -3.414800 |
| H  | 0.451136  | -0.179778 | -2.888657 |
| C  | 2.677232  | -2.755298 | -2.945796 |
| H  | 3.612265  | -3.627355 | -1.205736 |
| H  | 1.590088  | -1.694004 | -4.484388 |
| H  | 3.170569  | -3.431164 | -3.647726 |
| C  | 0.883904  | -0.460490 | 1.647375  |
| C  | 2.067822  | -0.154805 | 2.330084  |
| C  | -0.077500 | -1.274059 | 2.263866  |
| C  | 2.295159  | -0.671259 | 3.605220  |
| H  | 2.818097  | 0.490100  | 1.866043  |
| C  | 0.156562  | -1.793279 | 3.536862  |
| H  | -1.014360 | -1.488192 | 1.736299  |
| C  | 1.342422  | -1.494400 | 4.207704  |
| H  | 3.221750  | -0.429738 | 4.130669  |
| H  | -0.595016 | -2.429495 | 4.009562  |
| H  | 1.523126  | -1.899145 | 5.206102  |
| C  | 1.468399  | 1.684685  | -0.189255 |
| C  | 2.792219  | 1.738270  | -0.642221 |
| C  | 0.823478  | 2.872021  | 0.181927  |
| C  | 3.462486  | 2.959673  | -0.711716 |
| H  | 3.303866  | 0.822103  | -0.947034 |
| C  | 1.497420  | 4.090255  | 0.121320  |
| H  | -0.219502 | 2.835593  | 0.509566  |
| C  | 2.818164  | 4.135708  | -0.327292 |
| H  | 4.493744  | 2.992215  | -1.070297 |
| H  | 0.985723  | 5.009627  | 0.414113  |

|   |           |           |           |
|---|-----------|-----------|-----------|
| H | 3.343697  | 5.091448  | -0.385136 |
| H | -2.344288 | -3.652437 | -0.483068 |
| H | -0.822713 | -2.845875 | -0.056194 |
| H | -1.519890 | -2.613832 | -1.666644 |

79

Figure S13-1\_PA-PPh3(NaOMe)-ed(1,6) / electronic energy: -3911.04850322 a.u. / lowest freq: 12.82 cm<sup>-1</sup>

|    |           |           |           |
|----|-----------|-----------|-----------|
| Na | -1.972247 | -4.264442 | 0.100655  |
| O  | -3.947246 | -4.597387 | 0.631312  |
| Cu | 0.662078  | 0.561800  | -0.709108 |
| C  | 1.826965  | -1.052797 | -1.227912 |
| C  | 0.585468  | -1.525664 | -0.731302 |
| H  | 1.882172  | -0.950382 | -2.316967 |
| C  | 0.380154  | -1.958448 | 0.676482  |
| C  | -0.457635 | -1.928474 | -1.716995 |
| O  | 1.085571  | -1.227082 | 1.532831  |
| O  | -0.380323 | -2.827811 | 1.048654  |
| O  | -1.162660 | -2.909934 | -1.642805 |
| O  | -0.549280 | -1.058806 | -2.718688 |
| C  | -1.578513 | -1.284002 | -3.679775 |
| H  | -1.448782 | -2.259870 | -4.165978 |
| H  | -1.486034 | -0.477437 | -4.413581 |
| H  | -2.561740 | -1.243538 | -3.189231 |
| C  | 0.893116  | -1.477599 | 2.923259  |
| H  | -0.139879 | -1.232429 | 3.209281  |
| H  | 1.592565  | -0.817505 | 3.444826  |
| H  | 1.102883  | -2.529202 | 3.158631  |
| C  | 3.114718  | -1.089588 | -0.553373 |
| H  | 3.121166  | -1.275041 | 0.520071  |
| C  | 4.260082  | -0.854442 | -1.220565 |
| H  | 4.197690  | -0.641603 | -2.293552 |
| C  | 5.612980  | -0.821828 | -0.652543 |
| C  | 6.691560  | -0.495496 | -1.489864 |
| C  | 5.879642  | -1.085336 | 0.702898  |
| C  | 7.992393  | -0.427888 | -0.993706 |
| H  | 6.503712  | -0.287143 | -2.546306 |
| C  | 7.176968  | -1.019540 | 1.198081  |
| H  | 5.064224  | -1.338680 | 1.382972  |
| C  | 8.239737  | -0.689093 | 0.352729  |
| H  | 8.815128  | -0.167731 | -1.663120 |
| H  | 7.362960  | -1.224269 | 2.254607  |
| H  | 9.256849  | -0.634403 | 0.746692  |
| C  | 1.892225  | 2.079277  | -0.902338 |
| H  | 1.678689  | 2.927656  | -1.568718 |
| C  | 2.912547  | 2.173958  | -0.099207 |
| C  | 3.929259  | 2.196108  | 0.745101  |
| H  | 4.913742  | 1.811023  | 0.458198  |
| H  | 3.819585  | 2.602447  | 1.756494  |
| P  | -1.388781 | 1.306696  | 0.043366  |
| C  | -2.889708 | 0.389522  | -0.453090 |
| C  | -3.811644 | 0.923166  | -1.362238 |
| C  | -3.065876 | -0.924278 | 0.002900  |
| C  | -4.885293 | 0.148531  | -1.802907 |
| H  | -3.695658 | 1.943709  | -1.732745 |
| C  | -4.140019 | -1.699791 | -0.429719 |
| H  | -2.354333 | -1.359126 | 0.709805  |
| C  | -5.048876 | -1.157246 | -1.340885 |
| H  | -5.598158 | 0.572905  | -2.513516 |
| H  | -4.225019 | -2.738381 | -0.064047 |
| H  | -5.889783 | -1.758732 | -1.693635 |
| C  | -1.745182 | 3.035186  | -0.421754 |
| C  | -2.515043 | 3.873411  | 0.393515  |
| C  | -1.265856 | 3.512153  | -1.647136 |
| C  | -2.801125 | 5.174286  | -0.014916 |
| H  | -2.892141 | 3.509742  | 1.352521  |
| C  | -1.559029 | 4.812369  | -2.056677 |
| H  | -0.658696 | 2.863360  | -2.283412 |
| C  | -2.324303 | 5.644141  | -1.239733 |
| H  | -3.399906 | 5.824447  | 0.626204  |
| H  | -1.180462 | 5.179183  | -3.012941 |
| H  | -2.546884 | 6.665429  | -1.556188 |
| C  | -1.346461 | 1.320944  | 1.871274  |
| C  | -0.160004 | 1.786444  | 2.458934  |
| C  | -2.402658 | 0.903334  | 2.687445  |
| C  | -0.038695 | 1.839772  | 3.844418  |
| H  | 0.674905  | 2.103588  | 1.826472  |
| C  | -2.269752 | 0.943641  | 4.076289  |
| H  | -3.332437 | 0.540661  | 2.244728  |
| C  | -1.091582 | 1.412698  | 4.655408  |
| H  | 0.886776  | 2.206684  | 4.292898  |
| H  | -3.096072 | 0.609852  | 4.707132  |
| H  | -0.991605 | 1.444678  | 5.742416  |
| C  | -5.224974 | -4.856013 | 0.988699  |
| H  | -5.691471 | -5.741370 | 0.477169  |
| H  | -5.939985 | -4.012039 | 0.771105  |
| H  | -5.379845 | -5.060610 | 2.082906  |

79

Figure S13-1\_PA-PPh3(NaOMe)-ts(1,6) / electronic energy: -3911.03470938 a.u. / lowest freq: -446.88 cm<sup>-1</sup>

|    |           |           |          |
|----|-----------|-----------|----------|
| Na | -2.668687 | -3.697635 | 0.307189 |
| O  | -4.717032 | -3.856097 | 0.600942 |

|    |           |           |           |
|----|-----------|-----------|-----------|
| Cu | 0.674660  | 0.408546  | -0.851083 |
| C  | 1.804112  | -1.363958 | -1.000989 |
| C  | 0.494818  | -1.741346 | -0.521311 |
| H  | 1.934680  | -1.480517 | -2.081360 |
| C  | 0.181165  | -2.126690 | 0.858218  |
| C  | -0.502114 | -2.105808 | -1.547150 |
| O  | 1.185191  | -1.929264 | 1.716510  |
| O  | -0.882920 | -2.584577 | 1.244231  |
| O  | -1.399007 | -2.920332 | -1.448936 |
| O  | -0.330155 | -1.403630 | -2.677185 |
| C  | -1.246885 | -1.645086 | -3.736793 |
| H  | -1.175936 | -2.685355 | -4.083073 |
| H  | -0.962831 | -0.958871 | -4.541298 |
| H  | -2.274594 | -1.439647 | -3.406971 |
| C  | 0.975864  | -2.340640 | 3.060502  |
| H  | 0.079563  | -1.866399 | 3.480980  |
| H  | 1.867621  | -2.026011 | 3.613472  |
| H  | 0.864787  | -3.432644 | 3.116904  |
| C  | 2.970480  | -1.038874 | -0.291400 |
| H  | 2.924186  | -0.908349 | 0.788530  |
| C  | 4.177140  | -0.828642 | -0.967587 |
| H  | 4.244975  | -1.255825 | -1.970876 |
| C  | 5.471282  | -0.742899 | -0.251397 |
| C  | 6.635505  | -1.212912 | -0.874856 |
| C  | 5.578298  | -0.194741 | 1.036569  |
| C  | 7.868693  | -1.152937 | -0.227618 |
| H  | 6.570277  | -1.637854 | -1.880026 |
| C  | 6.809742  | -0.131450 | 1.682195  |
| H  | 4.690640  | 0.204442  | 1.532720  |
| C  | 7.960872  | -0.612393 | 1.054235  |
| H  | 8.762586  | -1.531269 | -0.728404 |
| H  | 6.874515  | 0.303080  | 2.682258  |
| H  | 8.926384  | -0.560412 | 1.561774  |
| C  | 1.720618  | 1.730060  | -1.970666 |
| H  | 1.067696  | 2.513264  | -2.360724 |
| C  | 2.975009  | 1.571152  | -2.037497 |
| C  | 4.266692  | 1.169830  | -1.906866 |
| H  | 4.797067  | 0.797395  | -2.787715 |
| H  | 4.888253  | 1.681348  | -1.165726 |
| P  | -1.171447 | 1.406895  | 0.058337  |
| C  | -2.655597 | 0.673090  | -0.709604 |
| C  | -3.125306 | 1.154403  | -1.939737 |
| C  | -3.235861 | -0.475142 | -0.158421 |
| C  | -4.182250 | 0.512358  | -2.582595 |
| H  | -2.672087 | 2.036736  | -2.398373 |
| C  | -4.284840 | -1.127938 | -0.806460 |
| H  | -2.855782 | -0.876813 | 0.784383  |
| C  | -4.760848 | -0.625782 | -2.018062 |
| H  | -4.550017 | 0.902235  | -3.534369 |
| H  | -4.678967 | -2.056064 | -0.360086 |
| H  | -5.583350 | -1.129912 | -2.530630 |
| C  | -1.343089 | 3.220204  | -0.122688 |
| C  | -2.586828 | 3.863942  | -0.161131 |
| C  | -0.171466 | 3.987205  | -0.133416 |
| C  | -2.654025 | 5.253925  | -0.223994 |
| H  | -3.510717 | 3.281362  | -0.146221 |
| C  | -0.242064 | 5.378991  | -0.189179 |
| H  | 0.803459  | 3.494130  | -0.096428 |
| C  | -1.482572 | 6.012840  | -0.239273 |
| H  | -3.627383 | 5.747385  | -0.259172 |
| H  | 0.677502  | 5.967781  | -0.198002 |
| H  | -1.539032 | 7.102297  | -0.290534 |
| C  | -1.354125 | 1.181277  | 1.863545  |
| C  | -0.202427 | 0.927664  | 2.615392  |
| C  | -2.582599 | 1.346247  | 2.517117  |
| C  | -0.276244 | 0.839532  | 4.006101  |
| H  | 0.759650  | 0.790976  | 2.114530  |
| C  | -2.656380 | 1.241935  | 3.903003  |
| H  | -3.489920 | 1.549241  | 1.943242  |
| C  | -1.502690 | 0.990706  | 4.649185  |
| H  | 0.628273  | 0.643036  | 4.585240  |
| H  | -3.618714 | 1.361474  | 4.404521  |
| H  | -1.563608 | 0.911434  | 5.736622  |
| C  | -6.045566 | -3.956871 | 0.825394  |
| H  | -6.546834 | -4.831445 | 0.326986  |
| H  | -6.639163 | -3.067499 | 0.467691  |
| H  | -6.338755 | -4.056295 | 1.906315  |

79

Figure S13-1\_PA-PPh3(NaOMe)-prod(1,6) / electronic energy: -3911.08630820 a.u. / lowest freq: -6.95 cm<sup>-1</sup>

|    |           |           |           |
|----|-----------|-----------|-----------|
| Na | -1.588288 | -4.245478 | 0.402898  |
| O  | -3.654203 | -4.511477 | 0.541988  |
| Cu | 0.872233  | 1.566394  | -0.168494 |
| C  | 1.899193  | -0.617114 | -0.558179 |
| C  | 1.036664  | -1.709045 | -0.217463 |
| H  | 2.079739  | -0.562443 | -1.637255 |
| C  | 0.716686  | -2.098575 | 1.135805  |
| C  | 0.548124  | -2.548876 | -1.298357 |
| O  | 1.349546  | -1.354671 | 2.072088  |
| O  | -0.031801 | -2.999630 | 1.498721  |

|   |           |           |           |
|---|-----------|-----------|-----------|
| O | -0.110684 | -3.576971 | -1.198623 |
| O | 0.927727  | -2.125703 | -2.523942 |
| C | 0.608359  | -2.963339 | -3.617284 |
| H | 1.087346  | -3.948066 | -3.512963 |
| H | 0.992092  | -2.457824 | -4.511108 |
| H | -0.476856 | -3.106242 | -3.706739 |
| C | 1.176498  | -1.748488 | 3.421294  |
| H | 0.111866  | -1.818154 | 3.682352  |
| H | 1.667466  | -0.979122 | 4.029226  |
| H | 1.647877  | -2.724766 | 3.606934  |
| C | 2.595780  | 0.328105  | 0.176496  |
| H | 2.605796  | 0.259997  | 1.267741  |
| C | 3.748207  | 1.089926  | -0.465178 |
| H | 3.616695  | 1.045873  | -1.558459 |
| C | 5.099293  | 0.474237  | -0.143635 |
| C | 5.943739  | 0.039475  | -1.169748 |
| C | 5.526768  | 0.323293  | 1.182249  |
| C | 7.183896  | -0.533051 | -0.883370 |
| H | 5.625376  | 0.148479  | -2.210106 |
| C | 6.764178  | -0.247130 | 1.472636  |
| H | 4.882211  | 0.647080  | 2.004011  |
| C | 7.598099  | -0.678130 | 0.439489  |
| H | 7.828309  | -0.868162 | -1.699258 |
| H | 7.078160  | -0.360236 | 2.512773  |
| H | 8.566861  | -1.128617 | 0.665986  |
| C | 1.310924  | 3.650978  | -0.667832 |
| H | 0.474453  | 4.267683  | -0.958880 |
| C | 2.385411  | 3.139355  | -0.374891 |
| C | 3.706811  | 2.580444  | -0.067170 |
| H | 4.485598  | 3.158013  | -0.588668 |
| H | 3.888736  | 2.691517  | 1.014072  |
| P | -1.392272 | 1.329987  | -0.081445 |
| C | -2.033696 | -0.033181 | -1.107275 |
| C | -1.800262 | 0.011588  | -2.488956 |
| C | -2.695752 | -1.135263 | -0.558847 |
| C | -2.276269 | -1.005995 | -3.310741 |
| H | -1.254278 | 0.850604  | -2.930071 |
| C | -3.145956 | -2.172127 | -1.377618 |
| H | -2.855922 | -1.207433 | 0.519244  |
| C | -2.947773 | -2.096544 | -2.755115 |
| H | -2.103921 | -0.954944 | -4.388064 |
| H | -3.590082 | -3.057137 | -0.895186 |
| H | -3.300031 | -2.904173 | -3.401149 |
| C | -2.343088 | 2.815753  | -0.592832 |
| C | -3.344494 | 2.804699  | -1.567930 |
| C | -2.042497 | 4.017949  | 0.065471  |
| C | -4.025590 | 3.980863  | -1.887969 |
| H | -3.603506 | 1.877082  | -2.081444 |
| C | -2.726596 | 5.188106  | -0.251593 |
| H | -1.274096 | 4.038302  | 0.844103  |
| C | -3.717979 | 5.172126  | -1.234834 |
| H | -4.805427 | 3.959946  | -2.651875 |
| H | -2.485925 | 6.116280  | 0.270812  |
| H | -4.252504 | 6.090209  | -1.487461 |
| C | -2.036090 | 1.036461  | 1.602287  |
| C | -1.146121 | 0.698958  | 2.625495  |
| C | -3.402725 | 1.166161  | 1.887589  |
| C | -1.616690 | 0.492996  | 3.923488  |
| H | -0.082284 | 0.583023  | 2.404350  |
| C | -3.869943 | 0.951837  | 3.180523  |
| H | -4.105513 | 1.438236  | 1.096253  |
| C | -2.976079 | 0.617540  | 4.200399  |
| H | -0.916402 | 0.235557  | 4.720403  |
| H | -4.935786 | 1.050802  | 3.395019  |
| H | -3.343960 | 0.455742  | 5.215781  |
| C | -4.983055 | -4.545439 | 0.777041  |
| H | -5.484338 | -5.526734 | 0.547591  |
| H | -5.575862 | -3.797099 | 0.175805  |
| H | -5.283903 | -4.331944 | 1.839810  |

15

Figure S14-1\_NaOtBu / electronic energy: -395.117378571 a.u. / lowest freq: 32.67 cm<sup>-1</sup>

|    |           |           |           |
|----|-----------|-----------|-----------|
| O  | -0.737133 | -0.009141 | 0.003654  |
| C  | 0.624960  | -0.000675 | -0.000009 |
| C  | 1.181519  | -1.414753 | -0.289909 |
| H  | 2.284457  | -1.455957 | -0.304558 |
| H  | 0.819613  | -2.118024 | 0.477986  |
| H  | 0.809650  | -1.764308 | -1.267141 |
| C  | 1.175601  | 0.461725  | 1.370139  |
| H  | 2.278378  | 0.484748  | 1.411897  |
| H  | 0.800290  | 1.473434  | 1.596181  |
| H  | 0.814389  | -0.215472 | 2.161532  |
| C  | 1.165629  | 0.961801  | -1.084173 |
| H  | 0.789122  | 1.980374  | -0.894033 |
| H  | 2.268079  | 1.001909  | -1.121930 |
| H  | 0.797342  | 0.647083  | -2.074606 |
| Na | -2.786410 | -0.000841 | 0.000833  |

32

Figure S14-1\_dienoate / electronic energy: -841.927078481 a.u. / lowest freq: 24.55 cm<sup>-1</sup>

|   |           |           |          |
|---|-----------|-----------|----------|
| C | -0.660544 | -0.726572 | 0.059153 |
|---|-----------|-----------|----------|

|   |           |           |           |
|---|-----------|-----------|-----------|
| C | -1.860539 | -0.097447 | 0.115996  |
| H | -0.691600 | -1.818492 | -0.004770 |
| C | -1.976243 | 1.390665  | 0.160143  |
| C | -3.120576 | -0.891785 | 0.187355  |
| O | -3.041424 | 1.823605  | -0.507466 |
| O | -1.182749 | 2.134043  | 0.689285  |
| O | -4.147702 | -0.497504 | 0.683440  |
| O | -2.981802 | -2.118850 | -0.320932 |
| C | -4.097604 | -2.989729 | -0.195724 |
| H | -4.332384 | -3.170881 | 0.862818  |
| H | -3.810049 | -3.927003 | -0.683244 |
| H | -4.981752 | -2.562067 | -0.688186 |
| C | -3.254671 | 3.228152  | -0.535442 |
| H | -3.354009 | 3.627502  | 0.483524  |
| H | -4.184056 | 3.384216  | -1.092621 |
| H | -2.420438 | 3.737793  | -1.038016 |
| C | 0.656646  | -0.129211 | 0.062308  |
| H | 0.725624  | 0.955889  | 0.150505  |
| C | 1.759981  | -0.902956 | -0.019704 |
| H | 1.621029  | -1.988149 | -0.089650 |
| C | 3.156351  | -0.453635 | -0.025165 |
| C | 4.175093  | -1.416830 | -0.109525 |
| C | 3.522207  | 0.902114  | 0.053056  |
| C | 5.517020  | -1.042840 | -0.114390 |
| H | 3.907556  | -2.474776 | -0.172060 |
| C | 4.861836  | 1.275255  | 0.048166  |
| H | 2.754752  | 1.675486  | 0.118691  |
| C | 5.863995  | 0.305241  | -0.035401 |
| H | 6.294080  | -1.807149 | -0.179427 |
| H | 5.127957  | 2.332459  | 0.111300  |
| H | 6.914980  | 0.602284  | -0.038425 |

71

Figure S14-1\_PA-Me2NHC(NaOtBu)-prod(1,4) / electronic energy: -3299.19328289 a.u. / lowest freq: 18.20 cm<sup>-1</sup>

|    |           |           |           |
|----|-----------|-----------|-----------|
| Cu | 3.148821  | 0.380493  | 0.095403  |
| C  | -2.096180 | -0.563248 | -0.615986 |
| C  | -1.289612 | 0.081912  | 0.505879  |
| H  | -1.981774 | -1.646054 | -0.493329 |
| C  | -1.342209 | 1.483088  | 0.744019  |
| C  | -0.379081 | -0.722243 | 1.253323  |
| O  | -2.096551 | 2.153849  | -0.177162 |
| O  | -0.813788 | 2.141494  | 1.649719  |
| O  | 0.490073  | -0.360722 | 2.061365  |
| O  | -0.512920 | -2.054128 | 1.004693  |
| C  | 0.481732  | -2.917957 | 1.496821  |
| H  | 1.430158  | -2.772527 | 0.955460  |
| H  | 0.120298  | -3.939163 | 1.322842  |
| H  | 0.661611  | -2.766660 | 2.570849  |
| C  | -2.232804 | 3.547353  | -0.009851 |
| H  | -2.613929 | 3.799907  | 0.990297  |
| H  | -2.946734 | 3.880471  | -0.773223 |
| H  | -1.272215 | 4.063626  | -0.158001 |
| C  | -3.575987 | -0.282169 | -0.554112 |
| H  | -3.876305 | 0.760757  | -0.687075 |
| C  | -4.499916 | -1.229369 | -0.344817 |
| H  | -4.165197 | -2.268355 | -0.233887 |
| C  | -5.959262 | -1.031164 | -0.246709 |
| C  | -6.803366 | -2.153204 | -0.239329 |
| C  | -6.553948 | 0.239129  | -0.152571 |
| C  | -8.188148 | -2.016442 | -0.153015 |
| H  | -6.361443 | -3.151182 | -0.305615 |
| C  | -7.936289 | 0.377899  | -0.066297 |
| H  | -5.926028 | 1.132720  | -0.134598 |
| C  | -8.762073 | -0.748841 | -0.067062 |
| H  | -8.821778 | -2.906604 | -0.150866 |
| H  | -8.375348 | 1.375428  | 0.010365  |
| H  | -9.846070 | -0.636687 | 0.005684  |
| C  | 0.947390  | -1.204127 | -2.283723 |
| H  | 1.935617  | -1.615737 | -2.358460 |
| C  | -0.166669 | -0.739519 | -2.186891 |
| C  | -1.524676 | -0.223429 | -2.020495 |
| H  | -2.170397 | -0.658033 | -2.802135 |
| H  | -1.527706 | 0.867895  | -2.165561 |
| Na | 1.277659  | 1.736154  | 2.303748  |
| O  | 2.564611  | 2.076788  | 0.523505  |
| C  | 2.342503  | 3.082536  | -0.421684 |
| C  | 1.349894  | 2.596132  | -1.487676 |
| H  | 1.103556  | 3.382220  | -2.220081 |
| H  | 1.768809  | 1.733854  | -2.031329 |
| H  | 0.420305  | 2.257648  | -1.007107 |
| C  | 3.667882  | 3.475105  | -1.092176 |
| H  | 3.539266  | 4.281514  | -1.832168 |
| H  | 4.391011  | 3.810374  | -0.332098 |
| H  | 4.099092  | 2.600275  | -1.606691 |
| C  | 1.752238  | 4.299934  | 0.305794  |
| H  | 1.558812  | 5.138699  | -0.381837 |
| H  | 0.800354  | 4.020933  | 0.784109  |
| H  | 2.447749  | 4.647955  | 1.086322  |
| C  | 5.012600  | -3.196000 | -1.057734 |
| H  | 6.060171  | -3.266023 | -1.385453 |



|   |          |           |           |
|---|----------|-----------|-----------|
| C | 4.840255 | -3.416305 | 0.449832  |
| H | 4.320473 | -4.354831 | 0.690216  |
| C | 3.927598 | -1.346026 | -0.129174 |
| C | 3.703114 | -2.026620 | 2.229345  |
| N | 4.501613 | -1.837137 | -1.233034 |
| N | 4.038026 | -2.259710 | 0.844064  |
| H | 5.802394 | -3.411712 | 0.989001  |
| H | 4.419281 | -3.902682 | -1.660861 |
| C | 4.623089 | -1.155779 | -2.497370 |
| H | 3.348530 | -2.961500 | 2.686847  |
| H | 2.890727 | -1.289325 | 2.284683  |
| H | 4.576531 | -1.668049 | 2.799736  |
| H | 4.160719 | -1.741594 | -3.308423 |
| H | 5.681951 | -0.990991 | -2.752230 |
| H | 4.120134 | -0.182769 | -2.427519 |

71

Figure S14-1\_PA-Me2NHC(NaOtBu)-ts(1,4) / electronic energy: -3299.12254340 a.u. / lowest freq: -363.32 cm-1

|    |           |           |           |
|----|-----------|-----------|-----------|
| Cu | 2.220225  | -0.114446 | -0.526722 |
| C  | -2.230909 | -0.848040 | 0.372173  |
| C  | -1.213524 | -0.176815 | 1.063075  |
| H  | -2.125321 | -1.931492 | 0.386553  |
| C  | -1.218886 | 1.258790  | 1.343622  |
| C  | -0.069163 | -0.960404 | 1.520700  |
| O  | -2.033221 | 1.954121  | 0.536407  |
| O  | -0.587430 | 1.830512  | 2.219290  |
| O  | 0.896113  | -0.546326 | 2.155922  |
| O  | -0.156993 | -2.256837 | 1.196558  |
| C  | 0.991366  | -3.057319 | 1.399776  |
| H  | 1.815809  | -2.698538 | 0.764590  |
| H  | 0.711398  | -4.075436 | 1.107475  |
| H  | 1.309714  | -3.042211 | 2.451721  |
| C  | -2.177960 | 3.339547  | 0.802681  |
| H  | -2.527528 | 3.509205  | 1.830830  |
| H  | -2.919185 | 3.709494  | 0.085729  |
| H  | -1.224286 | 3.865743  | 0.656487  |
| C  | -3.599373 | -0.391330 | 0.151733  |
| H  | -3.783208 | 0.682027  | 0.141701  |
| C  | -4.606280 | -1.269130 | -0.020140 |
| H  | -4.369181 | -2.339609 | -0.003117 |
| C  | -6.024124 | -0.949019 | -0.236283 |
| C  | -6.952521 | -1.999518 | -0.322486 |
| C  | -6.500330 | 0.367823  | -0.369045 |
| C  | -8.307322 | -1.748808 | -0.530299 |
| H  | -6.601414 | -3.030131 | -0.223603 |
| C  | -7.852467 | 0.618784  | -0.577417 |
| H  | -5.805325 | 1.208142  | -0.315526 |
| C  | -8.763249 | -0.437482 | -0.658486 |
| H  | -9.010726 | -2.582035 | -0.592948 |
| H  | -8.200882 | 1.648823  | -0.681221 |
| H  | -9.824064 | -0.237333 | -0.823562 |
| C  | 0.860461  | -0.755593 | -1.924661 |
| H  | 1.480740  | -0.824315 | -2.829424 |
| C  | -0.401318 | -0.916747 | -1.993527 |
| C  | -1.751360 | -1.011973 | -1.920577 |
| H  | -2.238352 | -1.990380 | -1.968230 |
| H  | -2.360344 | -0.155103 | -2.225309 |
| Na | 1.687087  | 1.604818  | 2.243013  |
| O  | 2.056141  | 1.773535  | 0.123205  |
| C  | 2.047645  | 2.871915  | -0.712429 |
| C  | 0.824666  | 2.839955  | -1.646800 |
| H  | 0.750031  | 3.742418  | -2.276544 |
| H  | 0.874303  | 1.955293  | -2.299260 |
| H  | -0.095077 | 2.745302  | -1.050473 |
| C  | 3.329246  | 2.907592  | -1.567734 |
| H  | 3.378364  | 3.789229  | -2.228540 |
| H  | 4.215733  | 2.910045  | -0.913027 |
| H  | 3.378966  | 2.003627  | -2.196266 |
| C  | 1.988431  | 4.151122  | 0.145421  |
| H  | 1.987713  | 5.073664  | -0.458283 |
| H  | 1.073329  | 4.145771  | 0.760533  |
| H  | 2.855260  | 4.188159  | 0.826417  |
| C  | 5.975284  | -2.076453 | -0.949841 |
| H  | 6.906384  | -1.632369 | -1.331624 |
| C  | 5.889106  | -2.079478 | 0.575531  |
| H  | 6.036523  | -3.076022 | 1.017107  |
| C  | 3.959171  | -1.067316 | -0.293913 |
| C  | 4.064002  | -1.409683 | 2.155277  |
| N  | 4.815371  | -1.267044 | -1.312094 |
| N  | 4.530456  | -1.593308 | 0.805295  |
| H  | 6.619892  | -1.392369 | 1.038162  |
| H  | 5.881250  | -3.089618 | -1.379205 |
| C  | 4.542187  | -0.976371 | -2.695067 |
| H  | 4.140556  | -2.354851 | 2.715801  |
| H  | 3.013779  | -1.095284 | 2.140373  |
| H  | 4.667466  | -0.650371 | 2.684615  |
| H  | 4.275891  | -1.887685 | -3.258342 |
| H  | 5.424630  | -0.520591 | -3.169739 |
| H  | 3.708346  | -0.267134 | -2.753228 |

71

Figure S14-1\_PA-Me2NHC(NaOtBu)-ed(1,4) / electronic energy: -3299.13603253 a.u. / lowest freq: 18.99 cm-1

|    |           |           |           |
|----|-----------|-----------|-----------|
| Cu | 1.721380  | -0.926895 | -0.012157 |
| C  | -1.829087 | 0.846149  | 1.402381  |
| C  | -0.874542 | 1.805731  | 1.238413  |
| H  | -1.558257 | 0.062202  | 2.110738  |
| C  | -0.947876 | 2.928537  | 0.274161  |
| C  | 0.403816  | 1.601877  | 1.969467  |
| O  | -2.195537 | 3.235758  | -0.068831 |
| O  | 0.002383  | 3.537447  | -0.176849 |
| O  | 1.489597  | 2.029201  | 1.621332  |
| O  | 0.255776  | 0.871569  | 3.062680  |
| C  | 1.433835  | 0.342768  | 3.657768  |
| H  | 1.935877  | -0.322299 | 2.939850  |
| H  | 1.100535  | -0.234993 | 4.525013  |
| H  | 2.114091  | 1.148741  | 3.965505  |
| C  | -2.362871 | 4.244255  | -1.058249 |
| H  | -1.934064 | 5.196212  | -0.717597 |
| H  | -3.442686 | 4.346807  | -1.205990 |
| H  | -1.877706 | 3.945204  | -1.998066 |
| C  | -3.082485 | 0.622443  | 0.728492  |
| H  | -3.466896 | 1.370792  | 0.037387  |
| C  | -3.711439 | -0.558383 | 0.926830  |
| H  | -3.241442 | -1.272854 | 1.613765  |
| C  | -4.946802 | -1.021761 | 0.292393  |
| C  | -5.376996 | -2.335114 | 0.543557  |
| C  | -5.718323 | -0.213904 | -0.561980 |
| C  | -6.538721 | -2.831669 | -0.042304 |
| H  | -4.784234 | -2.973307 | 1.203736  |
| C  | -6.880343 | -0.708815 | -1.143489 |
| H  | -5.411061 | 0.812605  | -0.771005 |
| C  | -7.293720 | -2.018965 | -0.887085 |
| H  | -6.854907 | -3.856875 | 0.160632  |
| H  | -7.471422 | -0.069234 | -1.802297 |
| H  | -8.205794 | -2.404777 | -1.347475 |
| C  | 0.123091  | -1.896366 | 0.688577  |
| H  | -0.578885 | -2.221228 | -0.103564 |
| C  | -0.304772 | -2.186855 | 1.883664  |
| C  | -0.728063 | -2.427691 | 3.120727  |
| H  | -0.495643 | -3.363101 | 3.642290  |
| H  | -1.319178 | -1.687491 | 3.675407  |
| Na | 1.994317  | 2.350928  | -0.621913 |
| O  | 1.269225  | 0.506324  | -1.457660 |
| C  | 0.447265  | 0.263315  | -2.537338 |
| C  | -1.037206 | 0.248774  | -2.121013 |
| H  | -1.710774 | 0.003408  | -2.959536 |
| H  | -1.192440 | -0.485606 | -1.318153 |
| H  | -1.330773 | 1.235430  | -1.729577 |
| C  | 0.791716  | -1.094904 | -3.179565 |
| H  | 0.201494  | -1.305324 | -4.087385 |
| H  | 1.860945  | -1.112398 | -3.444148 |
| H  | 0.611625  | -1.903228 | -2.452732 |
| C  | 0.642473  | 1.373619  | -3.590703 |
| H  | 0.007366  | 1.236909  | -4.482033 |
| H  | 0.396906  | 2.353052  | -3.145956 |
| H  | 1.695003  | 1.401344  | -3.917855 |
| C  | 5.727836  | -1.772925 | -1.043092 |
| H  | 5.937274  | -1.408372 | -2.064473 |
| C  | 6.019315  | -0.717245 | 0.022663  |
| H  | 6.511041  | -1.145790 | 0.914395  |
| C  | 3.699235  | -1.054153 | -0.100616 |
| C  | 4.515191  | 0.744633  | 1.390027  |
| N  | 4.295289  | -1.986130 | -0.866307 |
| N  | 4.677472  | -0.252099 | 0.365075  |
| H  | 6.647915  | 0.107447  | -0.344611 |
| H  | 6.291033  | -2.706319 | -0.895265 |
| C  | 3.605381  | -2.982505 | -1.642196 |
| H  | 4.950773  | 0.405531  | 2.346886  |
| H  | 3.448932  | 0.946690  | 1.541961  |
| H  | 5.018157  | 1.682792  | 1.103628  |
| H  | 4.076957  | -3.968662 | -1.506224 |
| H  | 3.613072  | -2.738759 | -2.718410 |
| H  | 2.563326  | -3.034677 | -1.300944 |

24

Figure S14-1\_Me2NHC-Cu-allenyl / electronic energy: -2062.03078001 a.u. / lowest freq: 21.55 cm-1

|    |           |           |           |
|----|-----------|-----------|-----------|
| C  | 2.887888  | 1.358348  | -0.035346 |
| H  | 3.277552  | 1.952832  | 0.804727  |
| C  | 3.319391  | -0.113704 | 0.022402  |
| H  | 3.958317  | -0.407007 | -0.824313 |
| C  | 0.983177  | 0.001577  | 0.005623  |
| C  | 1.985205  | -2.256890 | -0.012542 |
| Cu | -0.884678 | -0.527874 | 0.007239  |
| N  | 1.431216  | 1.260707  | 0.032296  |
| N  | 2.039332  | -0.817337 | -0.026916 |
| H  | 3.855467  | -0.362962 | 0.952614  |
| H  | 3.193238  | 1.854637  | -0.970895 |
| C  | -2.756787 | -0.987275 | 0.006275  |
| H  | -3.144691 | -2.019394 | 0.014800  |
| C  | -3.661352 | -0.046202 | -0.005276 |
| C  | -4.537280 | 0.945925  | -0.016393 |

|   |           |           |           |
|---|-----------|-----------|-----------|
| H | -4.916550 | 1.362518  | -0.955914 |
| H | -4.921179 | 1.378936  | 0.913749  |
| C | 0.611326  | 2.445877  | 0.008128  |
| H | -0.443456 | 2.155748  | 0.095145  |
| H | 0.750709  | 3.002155  | -0.933173 |
| H | 0.867325  | 3.111400  | 0.847231  |
| H | 0.934995  | -2.573150 | -0.046960 |
| H | 2.448897  | -2.660356 | 0.902272  |
| H | 2.511789  | -2.676553 | -0.884111 |

39

Figure S14-1\_Me2NHC-Cu(NaOtBu)-allenyl / electronic energy: -2457.18214053 a.u. / lowest freq: 21.95 cm-1

|    |           |           |           |
|----|-----------|-----------|-----------|
| C  | -4.054956 | -0.330905 | -0.412546 |
| H  | -4.842737 | -1.086415 | -0.274017 |
| C  | -3.825790 | 0.533366  | 0.831328  |
| H  | -4.204421 | 1.560139  | 0.717717  |
| C  | -1.783980 | -0.401412 | 0.163591  |
| C  | -1.679461 | 1.287251  | 1.949001  |
| Cu | 0.154006  | -0.789109 | 0.161368  |
| N  | -2.747405 | -0.956421 | -0.591115 |
| N  | -2.371193 | 0.516421  | 0.946728  |
| H  | -4.290088 | 0.099680  | 1.734523  |
| H  | -4.315960 | 0.270790  | -1.301294 |
| C  | 1.349335  | -2.400801 | 0.166366  |
| H  | 0.881293  | -3.396889 | 0.086776  |
| C  | 2.647612  | -2.408852 | 0.120935  |
| C  | 3.977366  | -2.302739 | 0.096620  |
| H  | 4.575544  | -2.419615 | 1.008256  |
| H  | 4.522522  | -2.183133 | -0.846117 |
| C  | -2.514262 | -1.889256 | -1.661388 |
| O  | 1.221742  | 0.999702  | 0.356666  |
| C  | 1.300124  | 1.921772  | -0.670988 |
| C  | 1.854605  | 3.251545  | -0.124956 |
| H  | 1.189651  | 3.638566  | 0.663808  |
| H  | 2.849643  | 3.088098  | 0.322214  |
| H  | 1.954147  | 4.025418  | -0.904340 |
| C  | -0.083610 | 2.184365  | -1.297295 |
| H  | -0.044524 | 2.956047  | -2.083896 |
| H  | -0.480425 | 1.256822  | -1.739759 |
| H  | -0.794731 | 2.510515  | -0.522949 |
| C  | 2.243430  | 1.405378  | -1.778431 |
| H  | 1.880990  | 0.430889  | -2.144306 |
| H  | 2.316256  | 2.096287  | -2.635232 |
| H  | 3.260750  | 1.256363  | -1.378436 |
| Na | 2.943697  | 0.062658  | 1.291580  |
| H  | -0.610791 | 1.304664  | 1.682357  |
| H  | -1.818895 | 0.863086  | 2.959373  |
| H  | -2.061944 | 2.320366  | 1.955920  |
| H  | -1.484231 | -2.259859 | -1.579418 |
| H  | -2.644792 | -1.412161 | -2.648406 |
| H  | -3.210342 | -2.740603 | -1.595876 |

71

Figure S14-1\_PA-Me2NHC(NaOtBu)-ed(1,6) / electronic energy: -3299.13575585 a.u. / lowest freq: 13.68 cm-1

|    |           |           |           |
|----|-----------|-----------|-----------|
| C  | 3.334554  | 0.963341  | 2.093971  |
| H  | 4.164538  | 0.976693  | 1.364841  |
| C  | 2.512660  | 2.256769  | 2.132353  |
| H  | 2.572938  | 2.781671  | 3.097492  |
| C  | 1.114792  | 0.482696  | 1.538541  |
| C  | 0.045568  | 2.690609  | 1.818145  |
| Cu | -0.526525 | -0.439230 | 0.879588  |
| N  | 2.342968  | -0.014252 | 1.632278  |
| N  | 1.153634  | 1.776163  | 1.882082  |
| C  | -1.661598 | -0.777557 | -0.803931 |
| C  | -0.400631 | -0.225026 | -1.166222 |
| H  | 2.807469  | 2.968878  | 1.341720  |
| H  | 3.711606  | 0.670052  | 3.088208  |
| H  | -1.730813 | -1.865085 | -0.887699 |
| C  | -0.139006 | 1.209653  | -1.463224 |
| C  | 0.695646  | -1.160478 | -1.536109 |
| O  | -1.241374 | 1.910053  | -1.698142 |
| O  | 0.960080  | 1.728874  | -1.490354 |
| O  | 1.735436  | -0.854285 | -2.083845 |
| O  | 0.430388  | -2.423260 | -1.203484 |
| C  | 1.404710  | -3.402807 | -1.546573 |
| H  | 1.533783  | -3.454518 | -2.636105 |
| H  | 1.019848  | -4.353367 | -1.164103 |
| H  | 2.371212  | -3.167363 | -1.080792 |
| C  | -1.089110 | 3.298560  | -1.968497 |
| H  | -0.587617 | 3.805429  | -1.133068 |
| H  | -2.101810 | 3.693598  | -2.097614 |
| H  | -0.503804 | 3.450463  | -2.885163 |
| C  | -2.938569 | -0.100401 | -0.669913 |
| H  | -2.937421 | 0.980576  | -0.536945 |
| C  | -4.098771 | -0.788779 | -0.676157 |
| H  | -4.059267 | -1.870240 | -0.834605 |
| C  | -5.445064 | -0.228195 | -0.498691 |
| C  | -6.551735 | -1.091665 | -0.554410 |
| C  | -5.683265 | 1.137977  | -0.267993 |
| C  | -7.849099 | -0.612092 | -0.388291 |
| H  | -6.385986 | -2.158247 | -0.727089 |

|    |           |           |           |
|----|-----------|-----------|-----------|
| C  | -6.978774 | 1.618219  | -0.103539 |
| H  | -4.848209 | 1.839249  | -0.213992 |
| C  | -8.068363 | 0.746347  | -0.162553 |
| H  | -8.692651 | -1.304434 | -0.433763 |
| H  | -7.141285 | 2.683541  | 0.074396  |
| H  | -9.083592 | 1.126812  | -0.031016 |
| C  | -1.598275 | -1.203096 | 2.344546  |
| H  | -1.180415 | -1.087888 | 3.355640  |
| C  | -2.719089 | -1.847388 | 2.217989  |
| C  | -3.867830 | -2.469366 | 2.014982  |
| H  | -3.909842 | -3.546651 | 1.823613  |
| H  | -4.816739 | -1.924025 | 2.043664  |
| C  | 2.743678  | -1.370737 | 1.352815  |
| Na | 3.133607  | 0.901431  | -1.465780 |
| O  | 4.914055  | 0.359131  | -0.483799 |
| H  | 5.934165  | -1.435164 | -2.178152 |
| H  | 7.016025  | 0.857027  | -2.071439 |
| C  | 6.180587  | -1.578793 | -1.113165 |
| H  | 5.422335  | -2.252489 | -0.680578 |
| C  | 7.233892  | 0.692404  | -1.003052 |
| H  | 7.161604  | -2.081159 | -1.052211 |
| C  | 6.149430  | -0.217053 | -0.380795 |
| H  | 7.221474  | 1.673799  | -0.501326 |
| H  | 8.251665  | 0.273376  | -0.919550 |
| C  | 6.525852  | -0.463886 | 1.100577  |
| H  | 6.541089  | 0.492439  | 1.649008  |
| H  | 5.773063  | -1.112308 | 1.577489  |
| H  | 7.513542  | -0.941537 | 1.217897  |
| H  | -0.873666 | 2.134674  | 1.588278  |
| H  | 0.207604  | 3.452113  | 1.036610  |
| H  | -0.093003 | 3.208397  | 2.780029  |
| H  | 1.870011  | -1.944746 | 1.017939  |
| H  | 3.148559  | -1.848885 | 2.259910  |
| H  | 3.525114  | -1.351768 | 0.575667  |

71

Figure S14-1\_PA-Me2NHC(NaOtBu)-ts(1,6) / electronic energy: -3299.12365436 a.u. / lowest freq: -453.31 cm-1

|    |           |           |           |
|----|-----------|-----------|-----------|
| C  | -3.286118 | -1.585501 | 1.644382  |
| H  | -4.109096 | -1.389444 | 0.933108  |
| C  | -2.433101 | -2.812434 | 1.306453  |
| H  | -2.519090 | -3.619755 | 2.048906  |
| C  | -1.063554 | -0.921265 | 1.347666  |
| C  | 0.060971  | -3.098171 | 1.029612  |
| Cu | 0.532262  | 0.207231  | 0.982055  |
| N  | -2.310736 | -0.496464 | 1.524662  |
| N  | -1.078484 | -2.259171 | 1.288128  |
| C  | 1.684870  | 1.059137  | -0.600225 |
| C  | 0.391930  | 0.657809  | -1.102239 |
| H  | -2.673859 | -3.236074 | 0.315474  |
| H  | -3.683581 | -1.616977 | 2.673418  |
| H  | 1.744854  | 2.119440  | -0.340477 |
| C  | 0.103506  | -0.623287 | -1.761945 |
| C  | -0.680960 | 1.664444  | -1.125039 |
| O  | 1.196208  | -1.351195 | -2.012596 |
| O  | -1.000902 | -1.047802 | -2.064272 |
| O  | -1.766639 | 1.561224  | -1.669218 |
| O  | -0.369575 | 2.778927  | -0.443843 |
| C  | -1.339865 | 3.815870  | -0.433050 |
| H  | -1.513064 | 4.199542  | -1.448137 |
| H  | -0.929395 | 4.606913  | 0.203178  |
| H  | -2.292932 | 3.454720  | -0.022258 |
| C  | 1.010245  | -2.599526 | -2.661318 |
| H  | 0.344541  | -3.251751 | -2.079854 |
| H  | 2.004881  | -3.051005 | -2.741035 |
| H  | 0.579411  | -2.457605 | -3.662028 |
| C  | 2.903273  | 0.364662  | -0.550962 |
| H  | 2.936238  | -0.683420 | -0.842333 |
| C  | 4.052010  | 0.984577  | -0.050492 |
| H  | 4.032027  | 2.077075  | -0.020986 |
| C  | 5.404415  | 0.405194  | -0.232449 |
| C  | 6.517481  | 1.256852  | -0.283312 |
| C  | 5.620608  | -0.977429 | -0.344676 |
| C  | 7.804165  | 0.748105  | -0.454342 |
| H  | 6.369587  | 2.336007  | -0.188821 |
| C  | 6.904928  | -1.486652 | -0.515454 |
| H  | 4.777026  | -1.668606 | -0.285506 |
| C  | 8.003682  | -0.626595 | -0.572979 |
| H  | 8.655102  | 1.431886  | -0.494799 |
| H  | 7.051289  | -2.565690 | -0.602007 |
| H  | 9.010200  | -1.028913 | -0.706386 |
| C  | 1.540332  | 0.599036  | 2.682194  |
| H  | 0.893621  | 0.509558  | 3.555481  |
| C  | 2.780033  | 0.826788  | 2.560980  |
| C  | 4.067386  | 0.980856  | 2.149455  |
| H  | 4.534652  | 1.966871  | 2.227324  |
| H  | 4.744611  | 0.132385  | 2.285319  |
| C  | -2.741960 | 0.873162  | 1.659185  |
| Na | -3.137088 | -0.283663 | -1.694742 |
| O  | -4.922198 | -0.203749 | -0.578296 |
| H  | -6.040686 | 1.989637  | -1.598508 |

|   |           |           |           |
|---|-----------|-----------|-----------|
| H | -7.026160 | -0.262607 | -2.239202 |
| C | -6.282487 | 1.770720  | -0.545207 |
| H | -5.551060 | 2.303225  | 0.084981  |
| C | -7.233964 | -0.460761 | -1.174577 |
| H | -7.284793 | 2.180642  | -0.330854 |
| C | -6.179780 | 0.248521  | -0.293167 |
| H | -7.171384 | -1.549914 | -1.016608 |
| H | -8.268023 | -0.139132 | -0.960632 |
| C | -6.540318 | -0.016631 | 1.188896  |
| H | -6.504844 | -1.098899 | 1.395985  |
| H | -5.805948 | 0.475001  | 1.847550  |
| H | -7.545073 | 0.351432  | 1.458281  |
| H | 0.966310  | -2.478405 | 0.982097  |
| H | -0.053867 | -3.633312 | 0.072585  |
| H | 0.188476  | -3.847527 | 1.826840  |
| H | -1.885493 | 1.541434  | 1.500873  |
| H | -3.147224 | 1.054785  | 2.668794  |
| H | -3.531871 | 1.064400  | 0.914715  |

71

Figure S14-1\_PA-Me2NHC(NaOtBu)-prod(1,6) / electronic energy: -3299.17749962 a.u. / lowest freq: 16.45 cm<sup>-1</sup>

|    |           |           |           |
|----|-----------|-----------|-----------|
| C  | -3.130428 | -1.973009 | 0.292674  |
| H  | -3.831028 | -1.222594 | -0.124943 |
| C  | -2.550280 | -2.972814 | -0.704680 |
| H  | -2.985499 | -3.978801 | -0.615807 |
| C  | -0.800544 | -1.941006 | 0.448086  |
| C  | -0.211056 | -3.888701 | -0.965149 |
| Cu | 1.072982  | -1.486223 | 0.889242  |
| N  | -1.919076 | -1.297854 | 0.772097  |
| N  | -1.132114 | -2.975259 | -0.343299 |
| C  | 1.402115  | 0.811534  | 0.191280  |
| C  | 0.255514  | 1.167169  | -0.607445 |
| H  | -2.668423 | -2.641934 | -1.752780 |
| H  | -3.620209 | -2.478262 | 1.145289  |
| H  | 1.449307  | 1.387546  | 1.121621  |
| C  | -0.126058 | 0.472550  | -1.809539 |
| C  | -0.628113 | 2.196922  | -0.107167 |
| O  | 0.743942  | -0.501850 | -2.158689 |
| O  | -1.130901 | 0.644709  | -2.497047 |
| O  | -1.640841 | 2.636503  | -0.642153 |
| O  | -0.258022 | 2.691707  | 1.098860  |
| C  | -1.126346 | 3.637780  | 1.691226  |
| H  | -1.228852 | 4.535884  | 1.065647  |
| H  | -0.674818 | 3.904658  | 2.653661  |
| H  | -2.126458 | 3.208527  | 1.854102  |
| C  | 0.427848  | -1.252392 | -3.313525 |
| H  | -0.555507 | -1.734966 | -3.216619 |
| H  | 1.210985  | -2.014028 | -3.407111 |
| H  | 0.416137  | -0.617653 | -4.211509 |
| C  | 2.467782  | -0.040287 | 0.004021  |
| H  | 2.604215  | -0.545511 | -0.955716 |
| C  | 3.673861  | -0.004304 | 0.930296  |
| H  | 3.386633  | 0.541831  | 1.843027  |
| C  | 4.854871  | 0.719241  | 0.306405  |
| C  | 5.386978  | 1.868609  | 0.898823  |
| C  | 5.430774  | 0.254635  | -0.883762 |
| C  | 6.468225  | 2.536863  | 0.321501  |
| H  | 4.947107  | 2.248638  | 1.824924  |
| C  | 6.510217  | 0.917527  | -1.462782 |
| H  | 5.029026  | -0.636909 | -1.373095 |
| C  | 7.034324  | 2.062569  | -0.860537 |
| H  | 6.869428  | 3.433238  | 0.799851  |
| H  | 6.945078  | 0.538651  | -2.390471 |
| H  | 7.881164  | 2.583017  | -1.313130 |
| C  | 1.952237  | -2.890051 | 2.210914  |
| H  | 1.325432  | -3.620029 | 2.698230  |
| C  | 2.865643  | -2.177740 | 1.796521  |
| C  | 4.057450  | -1.436763 | 1.356578  |
| H  | 4.819294  | -1.433421 | 2.151242  |
| H  | 4.488973  | -1.980984 | 0.500712  |
| C  | -2.041288 | -0.176708 | 1.669034  |
| Na | -3.150932 | 1.372165  | -1.772825 |
| O  | -4.643812 | 0.569529  | -0.492293 |
| H  | -5.312560 | 3.073190  | 0.160208  |
| H  | -6.899692 | 1.763429  | -1.317259 |
| C  | -5.444704 | 2.311512  | 0.947137  |
| H  | -4.513548 | 2.277523  | 1.536816  |
| C  | -7.003618 | 1.006073  | -0.522209 |
| H  | -6.263328 | 2.641019  | 1.610633  |
| C  | -5.696208 | 0.928460  | 0.301045  |
| H  | -7.188574 | 0.033108  | -1.006350 |
| H  | -7.888225 | 1.265625  | 0.085431  |
| C  | -5.910643 | -0.099552 | 1.438974  |
| H  | -6.110124 | -1.095435 | 1.010485  |
| H  | -4.998122 | -0.175634 | 2.051870  |
| H  | -6.751032 | 0.164489  | 2.103636  |
| H  | 0.806944  | -3.675677 | -0.614127 |
| H  | -0.232742 | -3.790516 | -2.062568 |
| H  | -0.458705 | -4.931587 | -0.710193 |
| H  | -1.059539 | 0.287243  | 1.821046  |

|   |           |           |          |
|---|-----------|-----------|----------|
| H | -2.444634 | -0.497711 | 2.645397 |
| H | -2.740250 | 0.548989  | 1.223559 |

67

Figure S14-1\_PA-PMe3(NaOtBu)-prod(1,4) / electronic energy: -3454.34900971 a.u. / lowest freq: -2.20 cm-1

|    |           |           |           |
|----|-----------|-----------|-----------|
| Cu | 2.128826  | -0.372875 | -0.884453 |
| C  | -1.672103 | -0.563133 | -0.429984 |
| C  | -0.890517 | -0.117142 | 0.800470  |
| H  | -1.662973 | -1.659046 | -0.418441 |
| C  | -0.850307 | 1.251715  | 1.194184  |
| C  | -0.057723 | -1.062311 | 1.467773  |
| O  | -1.582764 | 2.062894  | 0.375419  |
| O  | -0.263302 | 1.768977  | 2.152050  |
| O  | 0.821327  | -0.854831 | 2.318202  |
| O  | -0.268524 | -2.350320 | 1.072729  |
| C  | 0.663782  | -3.308994 | 1.507889  |
| H  | 1.671226  | -3.078294 | 1.126431  |
| H  | 0.334428  | -4.271467 | 1.097416  |
| H  | 0.714633  | -3.369901 | 2.604591  |
| C  | -1.678250 | 3.424325  | 0.729986  |
| H  | -2.041193 | 3.549395  | 1.760390  |
| H  | -2.392061 | 3.873827  | 0.028408  |
| H  | -0.707440 | 3.934416  | 0.636398  |
| C  | -3.122025 | -0.150335 | -0.459739 |
| H  | -3.319216 | 0.909885  | -0.634687 |
| C  | -4.137511 | -1.005458 | -0.282716 |
| H  | -3.905747 | -2.064792 | -0.117068 |
| C  | -5.576725 | -0.677048 | -0.283195 |
| C  | -6.515230 | -1.718914 | -0.213911 |
| C  | -6.062701 | 0.640589  | -0.349519 |
| C  | -7.885405 | -1.461152 | -0.220093 |
| H  | -6.159704 | -2.751349 | -0.154583 |
| C  | -7.429971 | 0.900136  | -0.356900 |
| H  | -5.361942 | 1.477239  | -0.387547 |
| C  | -8.350158 | -0.148862 | -0.293579 |
| H  | -8.594119 | -2.290883 | -0.166797 |
| H  | -7.782866 | 1.932902  | -0.408853 |
| H  | -9.422739 | 0.057367  | -0.297829 |
| C  | 1.203391  | -1.676608 | -2.075808 |
| H  | 1.660954  | -2.580834 | -2.450483 |
| C  | 0.351662  | -0.798453 | -1.855443 |
| C  | -0.958754 | -0.133272 | -1.743474 |
| H  | -1.564240 | -0.427081 | -2.617405 |
| H  | -0.845587 | 0.958477  | -1.763314 |
| Na | 1.891712  | 1.118797  | 2.198696  |
| O  | 2.402274  | 1.300845  | 0.055413  |
| C  | 2.529228  | 2.530135  | -0.580519 |
| C  | 1.395995  | 2.745463  | -1.595462 |
| H  | 1.460078  | 3.727152  | -2.091738 |
| H  | 1.432770  | 1.964690  | -2.373203 |
| H  | 0.424187  | 2.670287  | -1.085898 |
| C  | 3.882032  | 2.612198  | -1.308531 |
| H  | 4.029938  | 3.578804  | -1.817021 |
| H  | 4.703531  | 2.473163  | -0.587290 |
| H  | 3.950776  | 1.811093  | -2.063007 |
| C  | 2.458720  | 3.638801  | 0.484112  |
| H  | 2.541889  | 4.647321  | 0.048837  |
| H  | 1.500076  | 3.571940  | 1.023064  |
| H  | 3.277146  | 3.518638  | 1.213924  |
| P  | 4.089669  | -1.425938 | -0.226004 |
| C  | 4.301984  | -3.229375 | -0.480696 |
| H  | 4.284704  | -3.445189 | -1.559202 |
| H  | 5.251711  | -3.589809 | -0.057637 |
| H  | 3.470997  | -3.774777 | -0.011065 |
| C  | 5.645286  | -0.747165 | -0.912788 |
| H  | 5.675209  | -0.920974 | -1.998069 |
| H  | 5.668426  | 0.336877  | -0.737129 |
| H  | 6.526251  | -1.213778 | -0.446836 |
| C  | 4.315638  | -1.215024 | 1.580306  |
| H  | 3.388962  | -1.506226 | 2.097025  |
| H  | 5.162388  | -1.804766 | 1.961491  |
| H  | 4.505604  | -0.149859 | 1.775993  |

67

Figure S14-1\_PA-PMe3(NaOtBu)-ts(1,4) / electronic energy: -3454.28410031 a.u. / lowest freq: -357.37 cm-1

|    |           |           |           |
|----|-----------|-----------|-----------|
| Cu | 2.195907  | -0.251986 | -0.746317 |
| C  | -1.970110 | -0.842094 | 0.140522  |
| C  | -0.870449 | -0.318606 | 0.839521  |
| H  | -1.966147 | -1.929164 | 0.076413  |
| C  | -0.730578 | 1.095789  | 1.181545  |
| C  | 0.166837  | -1.245469 | 1.286096  |
| O  | -1.485877 | 1.895615  | 0.414422  |
| O  | -0.035234 | 1.569278  | 2.067964  |
| O  | 1.175528  | -0.972462 | 1.927716  |
| O  | -0.091335 | -2.519241 | 0.951083  |
| C  | 0.890004  | -3.485932 | 1.264619  |
| H  | 1.814512  | -3.284424 | 0.706478  |
| H  | 0.477150  | -4.452977 | 0.957556  |
| H  | 1.113765  | -3.495815 | 2.340677  |
| C  | -1.525634 | 3.273426  | 0.748440  |
| H  | -1.801890 | 3.416751  | 1.802342  |

|    |           |           |           |
|----|-----------|-----------|-----------|
| H  | -2.281904 | 3.721237  | 0.094240  |
| H  | -0.551397 | 3.747624  | 0.565991  |
| C  | -3.307533 | -0.258560 | 0.061232  |
| H  | -3.399843 | 0.821638  | 0.166837  |
| C  | -4.396397 | -1.033259 | -0.102553 |
| H  | -4.250926 | -2.115062 | -0.206591 |
| C  | -5.795281 | -0.584723 | -0.153921 |
| C  | -6.813582 | -1.547423 | -0.248013 |
| C  | -6.167123 | 0.771067  | -0.113034 |
| C  | -8.155658 | -1.174927 | -0.294204 |
| H  | -6.545017 | -2.606542 | -0.284362 |
| C  | -7.506608 | 1.143721  | -0.159863 |
| H  | -5.401568 | 1.546678  | -0.047835 |
| C  | -8.507656 | 0.173358  | -0.249840 |
| H  | -8.929599 | -1.942207 | -0.365762 |
| H  | -7.773194 | 2.202517  | -0.127442 |
| H  | -9.558282 | 0.469363  | -0.287396 |
| C  | 0.960835  | -0.643965 | -2.267935 |
| H  | 1.579513  | -0.651846 | -3.175873 |
| C  | -0.307404 | -0.755189 | -2.299327 |
| C  | -1.653127 | -0.821916 | -2.153394 |
| H  | -2.167373 | -1.781473 | -2.262053 |
| H  | -2.251593 | 0.070771  | -2.359142 |
| Na | 2.196325  | 1.068629  | 2.186551  |
| O  | 2.732453  | 1.467530  | 0.106982  |
| C  | 2.722585  | 2.708412  | -0.509276 |
| C  | 1.567076  | 2.822266  | -1.518429 |
| H  | 1.483264  | 3.833863  | -1.949188 |
| H  | 1.710023  | 2.104906  | -2.341236 |
| H  | 0.615212  | 2.563642  | -1.030753 |
| C  | 4.052486  | 2.935871  | -1.251343 |
| H  | 4.090290  | 3.909681  | -1.767637 |
| H  | 4.893853  | 2.889242  | -0.541032 |
| H  | 4.196293  | 2.139779  | -1.999613 |
| C  | 2.554872  | 3.800148  | 0.566189  |
| H  | 2.561173  | 4.818968  | 0.145540  |
| H  | 1.601653  | 3.653401  | 1.099294  |
| H  | 3.372898  | 3.731586  | 1.302940  |
| P  | 4.025806  | -1.563633 | -0.224748 |
| C  | 4.315220  | -3.212301 | -0.986413 |
| H  | 4.192648  | -3.126494 | -2.076039 |
| H  | 5.322890  | -3.597031 | -0.765188 |
| H  | 3.570435  | -3.934501 | -0.621158 |
| C  | 5.498200  | -0.624068 | -0.788792 |
| H  | 5.454848  | -0.503538 | -1.881263 |
| H  | 5.446567  | 0.377165  | -0.338699 |
| H  | 6.442764  | -1.118048 | -0.514040 |
| C  | 4.443371  | -1.877765 | 1.538372  |
| H  | 3.628097  | -2.434310 | 2.019949  |
| H  | 5.386933  | -2.435769 | 1.639752  |
| H  | 4.545631  | -0.915341 | 2.060106  |

67

Figure S14-1\_PA-PMe3(NaOtBu)-ed(1,4) / electronic energy: -3454.29818810 a.u. / lowest freq: 18.18 cm-1

|    |           |           |           |
|----|-----------|-----------|-----------|
| Cu | -1.634374 | -0.792249 | 0.649156  |
| C  | 1.338301  | 0.009218  | -1.567567 |
| C  | 0.343944  | 0.901335  | -1.843097 |
| H  | 1.068376  | -1.034258 | -1.741861 |
| C  | 0.413219  | 2.361074  | -1.601707 |
| C  | -0.960892 | 0.331141  | -2.280602 |
| O  | 1.658305  | 2.815828  | -1.493344 |
| O  | -0.541343 | 3.108643  | -1.511950 |
| O  | -2.051084 | 0.850491  | -2.130696 |
| O  | -0.822054 | -0.854108 | -2.855360 |
| C  | -1.991159 | -1.646701 | -3.006485 |
| H  | -2.419854 | -1.849296 | -2.014494 |
| H  | -1.663034 | -2.583893 | -3.466202 |
| H  | -2.731612 | -1.140059 | -3.640408 |
| C  | 1.819851  | 4.192472  | -1.173873 |
| H  | 1.376421  | 4.827632  | -1.952309 |
| H  | 2.899614  | 4.363124  | -1.114931 |
| H  | 1.347707  | 4.420306  | -0.208030 |
| C  | 2.648474  | 0.194707  | -0.997720 |
| H  | 3.030686  | 1.201855  | -0.844486 |
| C  | 3.353444  | -0.895585 | -0.620232 |
| H  | 2.900026  | -1.879362 | -0.789293 |
| C  | 4.667064  | -0.912981 | 0.026948  |
| C  | 5.262195  | -2.153434 | 0.309406  |
| C  | 5.358442  | 0.259269  | 0.382048  |
| C  | 6.511439  | -2.224939 | 0.921184  |
| H  | 4.733030  | -3.072266 | 0.044331  |
| C  | 6.604697  | 0.187512  | 0.994086  |
| H  | 4.916237  | 1.237581  | 0.184837  |
| C  | 7.186266  | -1.054036 | 1.264335  |
| H  | 6.959662  | -3.198216 | 1.130877  |
| H  | 7.128224  | 1.106762  | 1.265012  |
| H  | 8.165104  | -1.106652 | 1.745716  |
| C  | -0.275127 | -2.235427 | 0.586050  |
| H  | 0.279484  | -2.396682 | 1.530025  |
| C  | 0.130688  | -3.006687 | -0.381902 |

|    |           |           |           |
|----|-----------|-----------|-----------|
| C  | 0.535775  | -3.746353 | -1.408677 |
| H  | 0.096385  | -4.726793 | -1.624979 |
| H  | 1.320961  | -3.398170 | -2.092382 |
| Na | -2.407772 | 2.310614  | -0.374655 |
| O  | -1.411100 | 1.145435  | 1.144321  |
| C  | -0.579906 | 1.534978  | 2.179019  |
| C  | 0.889622  | 1.202534  | 1.863275  |
| H  | 1.568215  | 1.455536  | 2.694885  |
| H  | 0.989574  | 0.129737  | 1.636944  |
| H  | 1.219558  | 1.760318  | 0.973289  |
| C  | -0.988397 | 0.819347  | 3.480494  |
| H  | -0.381601 | 1.125360  | 4.349133  |
| H  | -2.047189 | 1.031764  | 3.701965  |
| H  | -0.881871 | -0.270075 | 3.348350  |
| C  | -0.709695 | 3.057194  | 2.374822  |
| H  | -0.059788 | 3.443699  | 3.177084  |
| H  | -0.439296 | 3.571109  | 1.436993  |
| H  | -1.752441 | 3.319150  | 2.620419  |
| P  | -3.920925 | -1.061981 | 0.663532  |
| C  | -4.761104 | -2.386510 | -0.296898 |
| H  | -4.214743 | -3.331225 | -0.161796 |
| H  | -5.806738 | -2.523623 | 0.020107  |
| H  | -4.745495 | -2.132712 | -1.367154 |
| C  | -4.334102 | -1.540388 | 2.390784  |
| H  | -3.820233 | -2.480632 | 2.638493  |
| H  | -3.965165 | -0.761476 | 3.074132  |
| H  | -5.417715 | -1.670313 | 2.536482  |
| C  | -5.078110 | 0.348825  | 0.403575  |
| H  | -5.023752 | 0.681524  | -0.643967 |
| H  | -6.119775 | 0.074281  | 0.632028  |
| H  | -4.784137 | 1.184455  | 1.056512  |

20

Figure S14-1\_PMe3-Cu-allenyl / electronic energy: -2217.18081039 a.u. / lowest freq: 11.62 cm-1

|    |           |           |           |
|----|-----------|-----------|-----------|
| Cu | -0.560515 | -0.423386 | 0.001726  |
| C  | -2.432842 | -0.885638 | -0.001587 |
| H  | -2.795343 | -1.927024 | -0.005273 |
| C  | -3.361227 | 0.031773  | -0.000490 |
| C  | -4.267199 | 0.995333  | 0.000581  |
| H  | -4.659226 | 1.410942  | -0.933995 |
| H  | -4.662543 | 1.405822  | 0.936022  |
| P  | 1.600033  | 0.123266  | 0.000003  |
| C  | 2.106979  | 1.292186  | 1.312838  |
| C  | 2.192749  | 0.921748  | -1.535650 |
| C  | 2.748943  | -1.283932 | 0.218620  |
| H  | 2.020056  | 0.248047  | -2.386753 |
| H  | 3.265634  | 1.155681  | -1.467568 |
| H  | 1.628095  | 1.849055  | -1.706781 |
| H  | 2.586640  | -2.016914 | -0.584141 |
| H  | 2.546747  | -1.774259 | 1.181365  |
| H  | 3.795310  | -0.944582 | 0.195966  |
| H  | 1.880559  | 0.856225  | 2.296017  |
| H  | 1.540356  | 2.228190  | 1.209099  |
| H  | 3.183733  | 1.509209  | 1.250065  |

35

Figure S14-1\_PMe3-Cu(NaOtBu)-allenyl / electronic energy: -2612.34261472 a.u. / lowest freq: 8.82 cm-1

|    |           |           |           |
|----|-----------|-----------|-----------|
| O  | 1.376816  | 0.842483  | 0.055204  |
| C  | 1.131329  | 2.203974  | -0.029191 |
| C  | 0.442096  | 2.537528  | -1.363889 |
| H  | 0.228937  | 3.613224  | -1.477266 |
| H  | 1.081544  | 2.219009  | -2.202677 |
| H  | -0.505791 | 1.982636  | -1.433540 |
| C  | 2.467922  | 2.963757  | 0.048059  |
| H  | 2.337641  | 4.056072  | -0.022094 |
| H  | 2.974878  | 2.741450  | 1.001471  |
| H  | 3.129371  | 2.646726  | -0.775067 |
| C  | 0.231203  | 2.658089  | 1.133982  |
| H  | 0.716704  | 2.429272  | 2.096023  |
| H  | 0.009323  | 3.737495  | 1.103295  |
| H  | -0.720021 | 2.104473  | 1.098333  |
| Na | 3.084495  | -0.455719 | 0.171642  |
| Cu | -0.032157 | -0.549381 | -0.011145 |
| C  | 0.586035  | -2.477899 | 0.035776  |
| H  | -0.183685 | -3.266188 | 0.088586  |
| C  | 1.806658  | -2.909131 | -0.047656 |
| C  | 3.099190  | -3.236035 | -0.132842 |
| H  | 3.695751  | -3.433002 | 0.765551  |
| H  | 3.579367  | -3.415708 | -1.101330 |
| P  | -2.271743 | -0.275085 | -0.018208 |
| C  | -3.158051 | 1.194342  | -0.682451 |
| C  | -2.962645 | -0.386102 | 1.682269  |
| C  | -3.153926 | -1.643230 | -0.870792 |
| H  | -4.063547 | -0.386273 | 1.677483  |
| H  | -2.604439 | 0.465260  | 2.279309  |
| H  | -2.601336 | -1.310203 | 2.156320  |
| H  | -2.943506 | 1.296239  | -1.756527 |
| H  | -2.798531 | 2.102815  | -0.177539 |
| H  | -4.246646 | 1.109074  | -0.540966 |
| H  | -2.912686 | -1.619117 | -1.943624 |
| H  | -4.245180 | -1.571053 | -0.744156 |



H -2.802276 -2.602588 -0.464532

67

Figure S14-1\_PA-PMe3(NaOtBu)-ed(1,6) / electronic energy: -3454.28842449 a.u. / lowest freq: 19.30 cm-1

Na -3.242113 -0.795157 -2.211819  
O -3.708256 -1.375966 -0.179950  
Cu 0.366956 1.286753 0.562587  
C 1.492643 0.659942 -1.042368  
C 0.125953 0.382352 -1.281560  
H 1.876320 1.589046 -1.473869  
C -0.431500 -0.997473 -1.145336  
C -0.715351 1.333158 -2.044369  
O -0.207296 -1.531559 0.043380  
O -1.027492 -1.573680 -2.029741  
O -1.850792 1.115028 -2.423062  
O -0.118560 2.505029 -2.242072  
C -0.869453 3.518577 -2.898435  
H -1.137603 3.205026 -3.916558  
H -0.220231 4.399158 -2.933511  
H -1.786206 3.746872 -2.337593  
C -0.839286 -2.790450 0.309205  
H -1.928171 -2.651358 0.194993  
H -0.574269 -3.039620 1.341951  
H -0.461573 -3.559064 -0.378887  
C 2.497438 -0.302881 -0.625838  
H 2.152481 -1.232050 -0.167308  
C 3.814940 -0.058317 -0.772014  
H 4.120175 0.866269 -1.270641  
C 4.910151 -0.936281 -0.338632  
C 6.204132 -0.711975 -0.836373  
C 4.720426 -1.992739 0.569017  
C 7.269602 -1.526906 -0.460317  
H 6.371748 0.112544 -1.534284  
C 5.785213 -2.804958 0.947584  
H 3.733058 -2.171073 1.000024  
C 7.063395 -2.578646 0.432323  
H 8.266360 -1.338709 -0.865284  
H 5.618933 -3.616933 1.659028  
H 7.897094 -3.216961 0.732904  
C 1.679554 2.078808 1.802989  
H 1.308174 2.445437 2.772481  
C 2.947032 2.244610 1.564601  
C 4.229904 2.365362 1.269846  
H 4.619526 3.253191 0.761040  
H 4.945398 1.580289 1.535416  
P -1.703469 1.417304 1.564318  
C -3.208038 1.748465 0.583377  
C -1.716481 2.697786 2.871969  
C -2.129375 -0.137152 2.421498  
H -6.571771 -1.252002 1.596030  
H -5.019560 -0.448788 1.965580  
H -5.915168 -0.008570 0.493629  
C -5.644630 -0.849836 1.152894  
H -3.852383 -2.731184 2.108791  
C -4.853633 -1.910923 0.353020  
H -6.704966 -2.912209 -0.375055  
H -6.070559 -1.632351 -1.441942  
H -3.990502 -3.875991 0.751778  
C -4.519352 -3.082421 1.305122  
C -5.779619 -2.452188 -0.762467  
H -5.415275 -3.528832 1.769469  
H -5.242203 -3.211657 -1.354675  
H -2.520282 -0.815311 1.640040  
H -2.913366 0.032762 3.175284  
H -1.240340 -0.565334 2.904724  
H -1.512578 3.682855 2.427882  
H -0.928763 2.479745 3.606873  
H -2.690125 2.723960 3.383666  
H -3.029849 2.538871 -0.158612  
H -4.038623 2.042567 1.242954  
H -3.474170 0.794434 0.091042

67

Figure S14-1\_PA-PMe3(NaOtBu)-ts(1,6) / electronic energy: -3454.27252064 a.u. / lowest freq: -463.81 cm-1

Na -3.264628 -1.042155 -2.112070  
O -4.277061 -0.871422 -0.246233  
Cu 0.360336 1.165573 0.465391  
C 1.566282 0.412256 -1.118029  
C 0.194212 0.022761 -1.337824  
H 1.849596 1.329492 -1.642332  
C -0.328940 -1.305136 -0.979162  
C -0.647451 0.872665 -2.190165  
O 0.262428 -1.823439 0.104725  
O -1.211368 -1.913890 -1.555095  
O -1.763506 0.613651 -2.609063  
O -0.084584 2.062536 -2.450786  
C -0.848857 2.984726 -3.211428  
H -1.059972 2.585993 -4.213464  
H -0.240064 3.891800 -3.289000  
H -1.800258 3.211145 -2.710171  
C -0.192855 -3.097805 0.539376

|   |           |           |           |
|---|-----------|-----------|-----------|
| H | -1.259657 | -3.056166 | 0.800315  |
| H | 0.403020  | -3.344947 | 1.424477  |
| H | -0.042738 | -3.855508 | -0.241904 |
| C | 2.625458  | -0.295966 | -0.534789 |
| H | 2.430427  | -1.245144 | -0.037328 |
| C | 3.909585  | 0.257633  | -0.498996 |
| H | 4.099678  | 1.065489  | -1.210782 |
| C | 5.105432  | -0.558211 | -0.174578 |
| C | 6.334654  | -0.247706 | -0.772452 |
| C | 5.054923  | -1.635477 | 0.724064  |
| C | 7.477017  | -0.997418 | -0.494701 |
| H | 6.393374  | 0.590961  | -1.471486 |
| C | 6.195282  | -2.382985 | 1.004219  |
| H | 4.115269  | -1.882966 | 1.223261  |
| C | 7.411999  | -2.069042 | 0.394595  |
| H | 8.423216  | -0.742168 | -0.977071 |
| H | 6.136330  | -3.215002 | 1.709584  |
| H | 8.306289  | -2.655359 | 0.616529  |
| C | 1.609513  | 2.345805  | 1.535657  |
| H | 1.063896  | 3.034709  | 2.182181  |
| C | 2.853748  | 2.140575  | 1.415373  |
| C | 4.103081  | 1.680774  | 1.132053  |
| H | 4.792630  | 2.331785  | 0.586679  |
| H | 4.571406  | 1.017864  | 1.865995  |
| P | -1.640737 | 1.231827  | 1.587405  |
| C | -3.099180 | 1.892919  | 0.705589  |
| C | -1.522618 | 2.253205  | 3.103914  |
| C | -2.216248 | -0.398532 | 2.180537  |
| H | -6.891035 | -0.521701 | 1.850407  |
| H | -5.189110 | -0.057126 | 2.134581  |
| H | -6.118341 | 0.736984  | 0.843342  |
| C | -5.950319 | -0.224191 | 1.356173  |
| H | -4.468734 | -2.492871 | 1.871329  |
| C | -5.443963 | -1.276957 | 0.342246  |
| H | -7.512355 | -1.814475 | -0.285705 |
| H | -6.722044 | -0.544905 | -1.264279 |
| H | -4.889009 | -3.385113 | 0.388383  |
| C | -5.240412 | -2.613872 | 1.093906  |
| C | -6.550839 | -1.487369 | -0.718283 |
| H | -6.161231 | -2.983834 | 1.577408  |
| H | -6.228367 | -2.249503 | -1.447989 |
| H | -2.753169 | -0.872241 | 1.334928  |
| H | -2.929250 | -0.280176 | 3.010784  |
| H | -1.365933 | -1.008898 | 2.514192  |
| H | -1.295286 | 3.295410  | 2.834663  |
| H | -0.714317 | 1.874240  | 3.746197  |
| H | -2.470562 | 2.229269  | 3.662097  |
| H | -2.804516 | 2.703244  | 0.024204  |
| H | -3.839130 | 2.272890  | 1.426498  |
| H | -3.562109 | 1.046105  | 0.156668  |

67

Figure S14-1\_PA-PMe3(NaOtBu)-prod(1,6) / electronic energy: -3454.32484583 a.u. / lowest freq: 17.63 cm-1

|    |           |           |           |
|----|-----------|-----------|-----------|
| Na | -3.049317 | -2.226155 | 0.755051  |
| O  | -4.456425 | -0.688750 | 0.303549  |
| Cu | 0.812971  | 1.780150  | -0.168877 |
| C  | 1.385063  | -0.544508 | -0.434460 |
| C  | 0.296474  | -1.379069 | 0.016703  |
| H  | 1.527258  | -0.603011 | -1.518894 |
| C  | -0.090978 | -1.528142 | 1.396976  |
| C  | -0.464740 | -2.103169 | -0.980300 |
| O  | 0.672518  | -0.802531 | 2.245786  |
| O  | -1.018721 | -2.193999 | 1.851062  |
| O  | -1.464402 | -2.791426 | -0.802803 |
| O  | 0.011958  | -1.952345 | -2.239804 |
| C  | -0.713770 | -2.586500 | -3.275946 |
| H  | -0.772833 | -3.672083 | -3.114939 |
| H  | -0.169536 | -2.375657 | -4.203642 |
| H  | -1.736020 | -2.185432 | -3.345023 |
| C  | 0.363991  | -0.890989 | 3.624538  |
| H  | -0.658349 | -0.539148 | 3.827107  |
| H  | 1.086099  | -0.246973 | 4.139610  |
| H  | 0.458468  | -1.923828 | 3.988416  |
| C  | 2.309355  | 0.242136  | 0.219583  |
| H  | 2.339315  | 0.247626  | 1.312069  |
| C  | 3.546857  | 0.771927  | -0.488884 |
| H  | 3.354349  | 0.764400  | -1.573872 |
| C  | 4.772320  | -0.089485 | -0.235708 |
| C  | 5.434621  | -0.709885 | -1.299532 |
| C  | 5.259415  | -0.291202 | 1.062546  |
| C  | 6.556314  | -1.509865 | -1.076955 |
| H  | 5.065011  | -0.566933 | -2.318571 |
| C  | 6.379912  | -1.087592 | 1.289087  |
| H  | 4.755322  | 0.173619  | 1.914320  |
| C  | 7.033691  | -1.700210 | 0.218496  |
| H  | 7.057943  | -1.986464 | -1.922256 |
| H  | 6.744693  | -1.233284 | 2.308393  |
| H  | 7.911631  | -2.325186 | 0.395841  |
| C  | 1.584494  | 3.757160  | -0.390200 |
| H  | 0.894103  | 4.571572  | -0.544069 |

|   |           |           |           |
|---|-----------|-----------|-----------|
| C | 2.556381  | 3.019777  | -0.241853 |
| C | 3.791628  | 2.239118  | -0.078003 |
| H | 4.605337  | 2.694768  | -0.662868 |
| H | 4.087169  | 2.291830  | 0.982515  |
| P | -1.459769 | 1.781014  | -0.225382 |
| C | -2.215347 | 0.730781  | -1.529808 |
| C | -2.281441 | 3.401629  | -0.466562 |
| C | -2.185302 | 1.193754  | 1.353538  |
| H | -6.692290 | 1.762889  | -0.272337 |
| H | -5.284034 | 1.794515  | 0.825801  |
| H | -5.039493 | 1.616983  | -0.930246 |
| C | -5.692444 | 1.333787  | -0.088701 |
| H | -6.277603 | -0.135288 | 2.165036  |
| C | -5.714070 | -0.206702 | 0.063097  |
| H | -7.302651 | -0.441312 | -1.476133 |
| H | -5.625058 | -0.558894 | -2.084777 |
| H | -6.725204 | -1.653686 | 1.346382  |
| C | -6.669533 | -0.558953 | 1.226014  |
| C | -6.288371 | -0.807363 | -1.240122 |
| H | -7.694266 | -0.177050 | 1.076047  |
| H | -6.329805 | -1.905998 | -1.156161 |
| H | -3.139056 | 0.666001  | 1.145813  |
| H | -2.340364 | 2.054452  | 2.020405  |
| H | -1.488075 | 0.505927  | 1.845661  |
| H | -2.001758 | 3.818328  | -1.444868 |
| H | -1.956656 | 4.100373  | 0.317774  |
| H | -3.374618 | 3.288956  | -0.418909 |
| H | -1.471685 | 0.028560  | -1.925261 |
| H | -2.557546 | 1.370692  | -2.356254 |
| H | -3.073467 | 0.180691  | -1.093110 |

13

Figure\_S15-1\_Na0Ph / electronic energy: -468.853649444 a.u. / lowest freq: 15.68 cm-1

|    |           |           |           |
|----|-----------|-----------|-----------|
| C  | -1.912599 | -1.200838 | -0.011375 |
| C  | -0.521476 | -1.206572 | 0.015351  |
| C  | 0.241248  | 0.001459  | 0.028090  |
| C  | -0.524240 | 1.207747  | 0.015228  |
| C  | -1.915348 | 1.198823  | -0.011498 |
| C  | -2.633248 | -0.001829 | -0.025828 |
| H  | -2.448993 | -2.155315 | -0.021458 |
| H  | 0.025710  | -2.154567 | 0.026010  |
| H  | 0.020847  | 2.156944  | 0.025804  |
| H  | -2.453903 | 2.152085  | -0.021671 |
| H  | -3.725390 | -0.003095 | -0.047610 |
| O  | 1.527681  | 0.002959  | 0.048939  |
| Na | 3.632205  | -0.001133 | -0.037490 |

32

Figure\_S15-1\_dienoate / electronic energy: -841.927078481 a.u. / lowest freq: 24.55 cm-1

|   |           |           |           |
|---|-----------|-----------|-----------|
| C | -0.660544 | -0.726572 | 0.059153  |
| C | -1.860539 | -0.097447 | 0.115996  |
| H | -0.691600 | -1.818492 | -0.004770 |
| C | -1.976243 | 1.390665  | 0.160143  |
| C | -3.120576 | -0.891785 | 0.187355  |
| O | -3.041424 | 1.823605  | -0.507466 |
| O | -1.182749 | 2.134043  | 0.689285  |
| O | -4.147702 | -0.497504 | 0.683440  |
| O | -2.981802 | -2.118850 | -0.320932 |
| C | -4.097604 | -2.989729 | -0.195724 |
| H | -4.332384 | -3.170881 | 0.862818  |
| H | -3.810049 | -3.927003 | -0.683244 |
| H | -4.981752 | -2.562067 | -0.688186 |
| C | -3.254671 | 3.228152  | -0.535442 |
| H | -3.354009 | 3.627502  | 0.483524  |
| H | -4.184056 | 3.384216  | -1.092621 |
| H | -2.420438 | 3.737793  | -1.038016 |
| C | 0.656646  | -0.129211 | 0.062308  |
| H | 0.725624  | 0.955889  | 0.150505  |
| C | 1.759981  | -0.902956 | -0.019704 |
| H | 1.621029  | -1.988149 | -0.089650 |
| C | 3.156351  | -0.453635 | -0.025165 |
| C | 4.175093  | -1.416830 | -0.109525 |
| C | 3.522207  | 0.902114  | 0.053056  |
| C | 5.517020  | -1.042840 | -0.114390 |
| H | 3.907556  | -2.474776 | -0.172060 |
| C | 4.861836  | 1.275255  | 0.048166  |
| H | 2.754752  | 1.675486  | 0.118691  |
| C | 5.863995  | 0.305241  | -0.035401 |
| H | 6.294080  | -1.807149 | -0.179427 |
| H | 5.127957  | 2.332459  | 0.111300  |
| H | 6.914980  | 0.602284  | -0.038425 |

64

Figure\_S15-1\_9d(Na0Ph)-Cu-allenyl / electronic energy: -3146.25617778 a.u. / lowest freq: 11.92 cm-1

|    |           |           |           |
|----|-----------|-----------|-----------|
| Cu | -0.619467 | -0.796156 | 0.827096  |
| C  | -0.346515 | -2.401130 | 1.871679  |
| C  | -0.937222 | 0.741398  | -0.321533 |
| N  | -2.143873 | 1.194277  | -0.727784 |
| N  | 0.001999  | 1.491143  | -0.883402 |
| C  | 1.428889  | 1.329861  | -0.605320 |
| C  | 0.000505  | -3.552073 | 1.370637  |
| C  | 0.379012  | -4.681143 | 0.783804  |

|    |           |           |           |
|----|-----------|-----------|-----------|
| C  | -0.538280 | 2.590848  | -1.682850 |
| H  | -0.064878 | 2.614677  | -2.671898 |
| C  | -2.024791 | 2.234507  | -1.754997 |
| H  | -2.687930 | 3.081346  | -1.533017 |
| C  | -3.384438 | 0.644678  | -0.341043 |
| C  | -4.475496 | 0.689404  | -1.214462 |
| C  | -3.536012 | 0.067039  | 0.924065  |
| C  | -5.702527 | 0.127497  | -0.846977 |
| C  | -4.745649 | -0.518589 | 1.301216  |
| C  | -5.819800 | -0.481859 | 0.406051  |
| H  | -6.774855 | -0.927927 | 0.697213  |
| H  | 1.928082  | -0.165857 | -2.634416 |
| H  | -2.295340 | 1.829362  | -2.742745 |
| H  | -0.361921 | 3.553497  | -1.177043 |
| H  | 1.548128  | 0.269518  | -0.343982 |
| C  | 1.868628  | 2.158545  | 0.586139  |
| C  | 2.053601  | 3.544278  | 0.504275  |
| C  | 2.081183  | 1.523956  | 1.815389  |
| C  | 2.431048  | 4.278172  | 1.628804  |
| H  | 1.910466  | 4.065296  | -0.445429 |
| C  | 2.459838  | 2.254661  | 2.940604  |
| H  | 1.953127  | 0.439958  | 1.885623  |
| C  | 2.633553  | 3.635791  | 2.850098  |
| H  | 2.572759  | 5.358128  | 1.547429  |
| H  | 2.623645  | 1.742288  | 3.891151  |
| H  | 2.931610  | 4.210602  | 3.729810  |
| C  | 2.268177  | 1.568157  | -1.865892 |
| H  | 3.322384  | 1.385089  | -1.581130 |
| H  | 2.205771  | 2.626217  | -2.173769 |
| O  | 1.853004  | 0.780671  | -2.934328 |
| H  | -0.497865 | -2.385581 | 2.963745  |
| H  | 1.440706  | -4.937140 | 0.691804  |
| H  | -0.352724 | -5.417789 | 0.434912  |
| O  | 2.095699  | -1.595484 | -1.830360 |
| C  | 3.222727  | -1.564585 | -1.170414 |
| C  | 4.447353  | -1.226071 | -1.804986 |
| C  | 3.281741  | -1.828571 | 0.224015  |
| C  | 5.640423  | -1.157639 | -1.091733 |
| H  | 4.422841  | -1.005951 | -2.875978 |
| C  | 4.482514  | -1.757915 | 0.926085  |
| H  | 2.350068  | -2.074064 | 0.744595  |
| C  | 5.675802  | -1.422792 | 0.280923  |
| H  | 6.562662  | -0.890149 | -1.616402 |
| H  | 4.483811  | -1.961209 | 2.001267  |
| H  | 6.614856  | -1.365732 | 0.835649  |
| Na | 0.382018  | -2.891610 | -1.448261 |
| C  | -4.878061 | -1.148536 | 2.663108  |
| H  | -4.770153 | -0.392767 | 3.456561  |
| H  | -5.854279 | -1.635792 | 2.789687  |
| H  | -4.092521 | -1.902634 | 2.823354  |
| C  | -6.862411 | 0.151859  | -1.808539 |
| H  | -7.814286 | -0.041059 | -1.295092 |
| H  | -6.937309 | 1.122263  | -2.320462 |
| H  | -6.741086 | -0.619441 | -2.586003 |
| H  | -2.706191 | 0.090239  | 1.634257  |
| H  | -4.376491 | 1.152925  | -2.197690 |

96

Figure\_S15-1\_PA-9d(NaOPh)-ts(1,6major)\_01 / electronic energy: -3988.22213482 a.u. / lowest freq: -455.12 cm-1

|    |           |           |           |
|----|-----------|-----------|-----------|
| C  | -3.327935 | -0.170787 | -1.529052 |
| H  | -4.192691 | -0.031508 | -0.867769 |
| C  | -2.662458 | 1.167411  | -1.862437 |
| H  | -2.655559 | 1.391704  | -2.938936 |
| C  | -1.099710 | -0.222582 | -0.802762 |
| C  | -0.307353 | 1.984154  | -1.521281 |
| C  | -0.693752 | 3.326459  | -1.474443 |
| C  | 1.035198  | 1.654344  | -1.714125 |
| C  | 0.261227  | 4.341403  | -1.568307 |
| C  | 2.003898  | 2.654658  | -1.817377 |
| C  | 1.606037  | 3.992765  | -1.733262 |
| H  | 2.359633  | 4.782000  | -1.811087 |
| Cu | 0.589861  | -0.977070 | -0.055773 |
| N  | -2.252470 | -0.892686 | -0.840558 |
| N  | -1.286505 | 0.971906  | -1.385249 |
| C  | 1.965462  | -1.086241 | 1.563534  |
| C  | 0.662027  | -0.741864 | 2.082639  |
| H  | -4.346931 | -0.894357 | 1.133336  |
| H  | -3.149871 | 1.996130  | -1.333085 |
| H  | -3.658809 | -0.718542 | -2.424534 |
| H  | 2.207410  | -2.145612 | 1.676566  |
| C  | 0.156130  | 0.624372  | 2.257305  |
| C  | -0.154870 | -1.838740 | 2.621282  |
| O  | 0.994914  | 1.557152  | 1.797065  |
| O  | -0.924652 | 0.939399  | 2.729923  |
| O  | -1.159894 | -1.740230 | 3.305429  |
| O  | 0.294497  | -3.051590 | 2.257921  |
| C  | -0.426588 | -4.176792 | 2.732978  |
| H  | -0.354837 | -4.256153 | 3.826921  |
| H  | 0.033866  | -5.051897 | 2.262414  |
| H  | -1.487690 | -4.108639 | 2.454327  |

|    |           |           |           |
|----|-----------|-----------|-----------|
| C  | 0.542522  | 2.902684  | 1.797709  |
| H  | -0.423369 | 2.988225  | 1.282248  |
| H  | 1.301639  | 3.473870  | 1.251265  |
| H  | 0.442156  | 3.281767  | 2.824648  |
| C  | -2.373061 | -2.267514 | -0.386333 |
| H  | -1.685211 | -2.369161 | 0.467484  |
| C  | -1.937462 | -3.280305 | -1.436109 |
| C  | -1.683413 | -4.598887 | -1.038105 |
| C  | -1.742102 | -2.940560 | -2.777612 |
| C  | -1.251371 | -5.553514 | -1.955278 |
| H  | -1.807979 | -4.881373 | 0.010719  |
| C  | -1.310564 | -3.895215 | -3.700081 |
| H  | -1.897914 | -1.914732 | -3.115175 |
| C  | -1.064815 | -5.205010 | -3.293562 |
| H  | -1.051187 | -6.573748 | -1.621048 |
| H  | -1.159109 | -3.607622 | -4.742649 |
| H  | -0.721669 | -5.950079 | -4.014199 |
| C  | -3.778561 | -2.558934 | 0.165904  |
| H  | -3.812528 | -3.629966 | 0.416967  |
| H  | -4.528915 | -2.408374 | -0.633139 |
| O  | -4.078303 | -1.835000 | 1.314456  |
| C  | 3.032978  | -0.282111 | 1.136206  |
| H  | 2.890660  | 0.791420  | 1.033708  |
| C  | 4.242865  | -0.875850 | 0.766478  |
| H  | 4.381132  | -1.910989 | 1.088387  |
| C  | 5.509869  | -0.119045 | 0.623319  |
| C  | 6.721975  | -0.824116 | 0.557491  |
| C  | 5.556988  | 1.282101  | 0.564712  |
| C  | 7.937097  | -0.157824 | 0.422689  |
| H  | 6.708202  | -1.916124 | 0.613352  |
| C  | 6.771171  | 1.950494  | 0.426032  |
| H  | 4.636864  | 1.864097  | 0.632769  |
| C  | 7.966812  | 1.235301  | 0.350907  |
| H  | 8.866906  | -0.728969 | 0.374719  |
| H  | 6.782858  | 3.041911  | 0.380514  |
| H  | 8.917917  | 1.760896  | 0.242826  |
| C  | 3.438840  | 2.280829  | -2.079289 |
| H  | 3.687790  | 1.316241  | -1.615480 |
| H  | 3.621636  | 2.181143  | -3.161356 |
| H  | 4.135300  | 3.039489  | -1.695484 |
| C  | -0.150970 | 5.784508  | -1.437302 |
| H  | 0.455210  | 6.436575  | -2.082376 |
| H  | -1.209991 | 5.926549  | -1.694249 |
| H  | -0.013809 | 6.131473  | -0.400079 |
| H  | -1.741173 | 3.589623  | -1.321334 |
| H  | 1.331896  | 0.608822  | -1.811012 |
| C  | 1.564418  | -1.991444 | -1.528407 |
| H  | 0.834209  | -2.419130 | -2.217874 |
| C  | 2.826855  | -1.914298 | -1.540685 |
| C  | 4.141091  | -1.648662 | -1.309680 |
| H  | 4.813686  | -2.478652 | -1.076657 |
| H  | 4.601615  | -0.814920 | -1.849771 |
| O  | -4.369248 | 0.677629  | 1.574864  |
| Na | -2.871114 | -0.291780 | 2.919350  |
| C  | -4.435046 | 1.836235  | 0.998837  |
| C  | -3.478783 | 2.858527  | 1.261779  |
| C  | -5.450364 | 2.153186  | 0.052960  |
| C  | -3.526907 | 4.085453  | 0.607708  |
| H  | -2.682447 | 2.640935  | 1.979065  |
| C  | -5.478837 | 3.380657  | -0.603153 |
| H  | -6.208769 | 1.393480  | -0.157842 |
| C  | -4.517069 | 4.362197  | -0.341689 |
| H  | -2.765505 | 4.839045  | 0.832557  |
| H  | -6.268084 | 3.577275  | -1.335127 |
| H  | -4.544731 | 5.324404  | -0.857420 |

96

Figure\_S15-1\_PA-9d(NaOPh)-ts(1,6major)\_02 / electronic energy: -3988.22242215 a.u. / lowest freq: -444.57 cm<sup>-1</sup>

|    |           |           |           |
|----|-----------|-----------|-----------|
| C  | 3.357333  | 0.184090  | -1.554637 |
| H  | 4.252495  | 0.098351  | -0.924952 |
| C  | 2.732862  | -1.185072 | -1.827107 |
| H  | 2.769970  | -1.473732 | -2.887023 |
| C  | 1.130680  | 0.206924  | -0.835199 |
| C  | 0.394025  | -2.040882 | -1.504401 |
| C  | 0.828452  | -3.369464 | -1.454373 |
| C  | -0.964995 | -1.764430 | -1.656379 |
| C  | -0.092836 | -4.418260 | -1.502234 |
| C  | -1.901141 | -2.798705 | -1.710393 |
| C  | -1.454522 | -4.120582 | -1.623423 |
| H  | -2.181919 | -4.936798 | -1.662472 |
| Cu | -0.600918 | 0.952335  | -0.163764 |
| N  | 2.278707  | 0.885819  | -0.852151 |
| N  | 1.339810  | -0.993094 | -1.404738 |
| C  | -1.998169 | 1.159341  | 1.436183  |
| C  | -0.689013 | 0.889510  | 1.985938  |
| H  | 4.422183  | 0.991342  | 1.101979  |
| H  | 3.217291  | -1.969232 | -1.231667 |
| H  | 3.624675  | 0.712384  | -2.482105 |
| H  | -2.266463 | 2.217925  | 1.464781  |
| C  | -0.140459 | -0.453506 | 2.221629  |

|    |           |           |           |
|----|-----------|-----------|-----------|
| C  | 0.076887  | 2.032137  | 2.504002  |
| O  | -0.932719 | -1.427444 | 1.762715  |
| O  | 0.929546  | -0.720338 | 2.744692  |
| O  | 1.159149  | 1.993469  | 3.066303  |
| O  | -0.517882 | 3.216440  | 2.283202  |
| C  | 0.159786  | 4.373946  | 2.749190  |
| H  | 0.298891  | 4.333928  | 3.838251  |
| H  | -0.476860 | 5.223773  | 2.480883  |
| H  | 1.143871  | 4.474704  | 2.268816  |
| C  | -0.437877 | -2.757096 | 1.820525  |
| H  | 0.530924  | -2.832332 | 1.308913  |
| H  | -1.176818 | -3.374872 | 1.297672  |
| H  | -0.327068 | -3.088531 | 2.862561  |
| C  | 2.383183  | 2.264047  | -0.372795 |
| H  | 1.751181  | 2.318879  | 0.524306  |
| C  | 1.847792  | 3.267059  | -1.377015 |
| C  | 0.730895  | 4.040476  | -1.046326 |
| C  | 2.439876  | 3.443747  | -2.633920 |
| C  | 0.207506  | 4.964571  | -1.949723 |
| H  | 0.248123  | 3.900388  | -0.075788 |
| C  | 1.917106  | 4.364357  | -3.540744 |
| H  | 3.320701  | 2.862755  | -2.916602 |
| C  | 0.798584  | 5.127290  | -3.201257 |
| H  | -0.672384 | 5.550635  | -1.675977 |
| H  | 2.388526  | 4.488919  | -4.517999 |
| H  | 0.389926  | 5.847367  | -3.913475 |
| C  | 3.799495  | 2.619424  | 0.099747  |
| H  | 3.787341  | 3.697838  | 0.321913  |
| H  | 4.522965  | 2.484744  | -0.727453 |
| O  | 4.192388  | 1.948157  | 1.252082  |
| C  | -3.046062 | 0.298746  | 1.076043  |
| H  | -2.878441 | -0.775793 | 1.068369  |
| C  | -4.269719 | 0.825250  | 0.654095  |
| H  | -4.435951 | 1.882806  | 0.874342  |
| C  | -5.514172 | 0.020680  | 0.585003  |
| C  | -6.745332 | 0.676142  | 0.424651  |
| C  | -5.520508 | -1.378723 | 0.689262  |
| C  | -7.938805 | -0.037908 | 0.357068  |
| H  | -6.764194 | 1.766778  | 0.348505  |
| C  | -6.713036 | -2.095084 | 0.619469  |
| H  | -4.585706 | -1.921920 | 0.833657  |
| C  | -7.927652 | -1.430100 | 0.450368  |
| H  | -8.883866 | 0.495145  | 0.231991  |
| H  | -6.692286 | -3.183910 | 0.704953  |
| H  | -8.862014 | -1.992928 | 0.397448  |
| C  | -3.357332 | -2.473994 | -1.913945 |
| H  | -3.619235 | -1.520767 | -1.434063 |
| H  | -3.586314 | -2.373640 | -2.987143 |
| H  | -4.012025 | -3.257522 | -1.507292 |
| C  | 0.373947  | -5.845081 | -1.373126 |
| H  | -0.205521 | -6.517027 | -2.022566 |
| H  | 1.438089  | -5.946846 | -1.627802 |
| H  | 0.246044  | -6.201454 | -0.338038 |
| H  | 1.887738  | -3.597876 | -1.333402 |
| H  | -1.304629 | -0.732947 | -1.753267 |
| C  | -1.613457 | 1.730724  | -1.754838 |
| H  | -0.895123 | 2.073004  | -2.500579 |
| C  | -2.876068 | 1.649111  | -1.751799 |
| C  | -4.186066 | 1.396624  | -1.488902 |
| H  | -4.868815 | 2.238189  | -1.342810 |
| H  | -4.636529 | 0.503465  | -1.933552 |
| O  | 4.385965  | -0.554589 | 1.602115  |
| Na | 2.879680  | 0.502921  | 2.871915  |
| C  | 4.459372  | -1.733700 | 1.072494  |
| C  | 3.498829  | -2.744205 | 1.364584  |
| C  | 5.485878  | -2.088335 | 0.152351  |
| C  | 3.551328  | -3.995121 | 0.758803  |
| H  | 2.696389  | -2.495515 | 2.064615  |
| C  | 5.519487  | -3.340785 | -0.454643 |
| H  | 6.247298  | -1.338030 | -0.079951 |
| C  | 4.552489  | -4.309888 | -0.167054 |
| H  | 2.784717  | -4.737647 | 1.001709  |
| H  | 6.316574  | -3.567343 | -1.169235 |
| H  | 4.583807  | -5.290794 | -0.646039 |

96

Figure\_S15-1\_PA-9d(NaOPh)-ts(1,6major)\_03 / electronic energy: -3988.21826606 a.u. / lowest freq: -458.70 cm-1

|    |           |           |           |
|----|-----------|-----------|-----------|
| C  | 3.050145  | 1.078887  | -1.500604 |
| H  | 3.987240  | 1.185367  | -0.937596 |
| C  | 2.787325  | -0.377335 | -1.888232 |
| H  | 2.756921  | -0.533053 | -2.975953 |
| C  | 0.986716  | 0.424532  | -0.619927 |
| C  | 0.832725  | -1.889699 | -1.400388 |
| C  | 1.619466  | -3.044593 | -1.478475 |
| C  | -0.559274 | -2.000116 | -1.410851 |
| C  | 1.023706  | -4.305987 | -1.534102 |
| C  | -1.174166 | -3.254565 | -1.444439 |
| C  | -0.372744 | -4.397455 | -1.510302 |
| H  | -0.846359 | -5.382627 | -1.548000 |
| Cu | -0.871618 | 0.664914  | 0.054094  |

|    |           |           |           |
|----|-----------|-----------|-----------|
| N  | 1.890393  | 1.400976  | -0.666476 |
| N  | 1.459744  | -0.626776 | -1.311540 |
| C  | -2.481238 | 0.497995  | 1.446044  |
| C  | -1.265695 | -0.042468 | 2.004019  |
| H  | 3.682423  | 1.166410  | 1.509683  |
| H  | 3.540382  | -1.050633 | -1.459496 |
| H  | 3.085208  | 1.743547  | -2.376326 |
| H  | -2.655393 | 1.553597  | 1.674544  |
| C  | -1.016146 | -1.498090 | 1.979637  |
| C  | -0.435755 | 0.828507  | 2.838313  |
| O  | 0.282060  | -1.847634 | 2.125651  |
| O  | -1.860646 | -2.345046 | 1.789679  |
| O  | 0.452481  | 0.470874  | 3.597320  |
| O  | -0.720621 | 2.132602  | 2.692246  |
| C  | 0.066686  | 3.048654  | 3.443580  |
| H  | -0.109182 | 2.920036  | 4.520599  |
| H  | -0.251715 | 4.047751  | 3.126987  |
| H  | 1.135116  | 2.899440  | 3.233561  |
| C  | 0.560484  | -3.242715 | 2.051241  |
| H  | 0.050408  | -3.783640 | 2.859907  |
| H  | 1.646205  | -3.345875 | 2.160170  |
| H  | 0.240719  | -3.648348 | 1.082384  |
| C  | 1.749173  | 2.658921  | 0.058725  |
| H  | 0.901032  | 2.497035  | 0.738550  |
| C  | 1.402166  | 3.834545  | -0.834188 |
| C  | 0.130920  | 4.412246  | -0.740820 |
| C  | 2.322793  | 4.379484  | -1.738699 |
| C  | -0.222619 | 5.496353  | -1.542457 |
| H  | -0.595417 | 3.997698  | -0.036702 |
| C  | 1.970099  | 5.460917  | -2.545615 |
| H  | 3.330627  | 3.965711  | -1.818243 |
| C  | 0.696138  | 6.020942  | -2.450999 |
| H  | -1.220693 | 5.931371  | -1.457064 |
| H  | 2.697795  | 5.870110  | -3.249833 |
| H  | 0.421018  | 6.868048  | -3.083148 |
| C  | 2.971034  | 2.936427  | 0.948450  |
| H  | 2.774816  | 3.889369  | 1.466688  |
| H  | 3.868542  | 3.106907  | 0.323563  |
| O  | 3.186835  | 1.942403  | 1.896333  |
| C  | -3.546257 | -0.177951 | 0.833588  |
| H  | -3.462552 | -1.251138 | 0.670820  |
| C  | -4.657250 | 0.525389  | 0.363540  |
| H  | -4.777970 | 1.539232  | 0.755808  |
| C  | -5.935333 | -0.141047 | 0.013314  |
| C  | -7.131326 | 0.587525  | 0.087364  |
| C  | -5.998806 | -1.481129 | -0.399188 |
| C  | -8.353605 | -0.002580 | -0.230125 |
| H  | -7.101077 | 1.634097  | 0.403095  |
| C  | -7.218540 | -2.071450 | -0.718264 |
| H  | -5.083923 | -2.070246 | -0.477634 |
| C  | -8.402636 | -1.336131 | -0.634519 |
| H  | -9.273239 | 0.582712  | -0.159752 |
| H  | -7.245193 | -3.116351 | -1.035825 |
| H  | -9.358451 | -1.802137 | -0.883261 |
| C  | -2.673048 | -3.358695 | -1.375022 |
| H  | -3.156003 | -2.489245 | -1.844377 |
| H  | -3.042482 | -4.270655 | -1.864001 |
| H  | -2.986356 | -3.386975 | -0.318718 |
| C  | 1.870994  | -5.551194 | -1.569942 |
| H  | 1.516828  | -6.253179 | -2.339170 |
| H  | 2.925160  | -5.317948 | -1.773742 |
| H  | 1.824485  | -6.078140 | -0.603661 |
| H  | 2.707759  | -2.969174 | -1.469382 |
| H  | -1.179923 | -1.100376 | -1.422149 |
| C  | -1.668131 | 1.662065  | -1.535396 |
| H  | -0.883877 | 2.084541  | -2.164436 |
| C  | -2.924844 | 1.606389  | -1.683427 |
| C  | -4.261079 | 1.362170  | -1.613270 |
| H  | -4.945753 | 2.201669  | -1.461533 |
| H  | -4.657841 | 0.542902  | -2.221137 |
| O  | 4.009052  | -0.392423 | 1.270414  |
| Na | 2.212723  | -0.467347 | 2.511718  |
| C  | 4.903856  | -1.041242 | 0.591912  |
| C  | 4.803268  | -2.444849 | 0.382742  |
| C  | 6.013494  | -0.392170 | -0.014344 |
| C  | 5.724042  | -3.133944 | -0.400372 |
| H  | 3.961467  | -2.972628 | 0.840502  |
| C  | 6.928212  | -1.093558 | -0.796022 |
| H  | 6.134047  | 0.683177  | 0.148765  |
| C  | 6.794896  | -2.469014 | -1.005943 |
| H  | 5.600770  | -4.211553 | -0.544703 |
| H  | 7.764789  | -0.554930 | -1.251081 |
| H  | 7.513267  | -3.013008 | -1.622582 |

96

Figure\_S15-1\_PA-9d(NaO<sub>3</sub>Ph)-ts(1,6minor)\_01 / electronic energy: -3988.21792967 a.u. / lowest freq: -450.44 cm<sup>-1</sup>

|   |          |           |          |
|---|----------|-----------|----------|
| C | 2.947852 | -1.853253 | 1.292620 |
| H | 3.636009 | -2.242294 | 0.530857 |
| C | 3.291331 | -0.408970 | 1.667599 |
| H | 3.492434 | -0.274941 | 2.740739 |

|    |           |           |           |
|----|-----------|-----------|-----------|
| C  | 1.121921  | -0.476297 | 0.781732  |
| C  | 1.983263  | 1.727379  | 1.434222  |
| C  | 3.147647  | 2.496801  | 1.459914  |
| C  | 0.740052  | 2.361285  | 1.548608  |
| C  | 3.078034  | 3.892791  | 1.552925  |
| C  | 0.648625  | 3.748597  | 1.620576  |
| C  | 1.827043  | 4.506250  | 1.621827  |
| H  | 1.764113  | 5.596357  | 1.686889  |
| Cu | -0.755762 | 0.011850  | 0.301166  |
| N  | 1.591961  | -1.721432 | 0.749736  |
| N  | 2.072511  | 0.323670  | 1.296305  |
| C  | -2.059354 | 1.038188  | -1.066307 |
| C  | -0.953404 | 0.439594  | -1.774156 |
| H  | 2.968430  | -2.887236 | -1.454515 |
| H  | 4.157379  | -0.048443 | 1.098707  |
| H  | 2.962229  | -2.535511 | 2.155470  |
| H  | -1.835292 | 2.036698  | -0.674990 |
| C  | 0.240514  | 1.251315  | -2.060058 |
| C  | -1.025600 | -0.884182 | -2.404348 |
| O  | 0.109489  | 2.526422  | -1.682795 |
| O  | 1.278087  | 0.851598  | -2.563347 |
| O  | -0.268341 | -1.330817 | -3.249899 |
| O  | -2.023718 | -1.641971 | -1.926776 |
| C  | -2.160949 | -2.945326 | -2.472590 |
| H  | -2.346251 | -2.899492 | -3.554395 |
| H  | -3.015918 | -3.398966 | -1.960268 |
| H  | -1.252544 | -3.539319 | -2.295974 |
| C  | 1.264349  | 3.348333  | -1.771322 |
| H  | 2.062027  | 2.967890  | -1.116630 |
| H  | 0.953987  | 4.342508  | -1.432833 |
| H  | 1.632659  | 3.395868  | -2.805279 |
| C  | 0.782273  | -2.850435 | 0.323874  |
| H  | 0.094406  | -2.459963 | -0.442337 |
| C  | -0.073497 | -3.427600 | 1.442287  |
| C  | -1.147768 | -4.259261 | 1.103237  |
| C  | 0.148552  | -3.141701 | 2.791753  |
| C  | -1.976139 | -4.796735 | 2.084966  |
| H  | -1.350812 | -4.476581 | 0.051234  |
| C  | -0.677987 | -3.680511 | 3.778918  |
| H  | 0.956848  | -2.470961 | 3.087892  |
| C  | -1.741573 | -4.510077 | 3.430303  |
| H  | -2.813655 | -5.435884 | 1.797175  |
| H  | -0.490606 | -3.442499 | 4.828196  |
| H  | -2.392400 | -4.925014 | 4.202740  |
| C  | 1.633016  | -3.921768 | -0.378528 |
| H  | 0.968934  | -4.771779 | -0.597040 |
| H  | 2.397865  | -4.302802 | 0.324972  |
| O  | 2.185070  | -3.486558 | -1.577706 |
| C  | -3.411297 | 0.676238  | -1.013817 |
| H  | -3.740212 | -0.238365 | -1.504379 |
| C  | -4.309035 | 1.410480  | -0.240619 |
| H  | -3.959336 | 2.388635  | 0.103806  |
| C  | -5.779080 | 1.312363  | -0.402577 |
| C  | -6.581030 | 2.409017  | -0.054926 |
| C  | -6.408837 | 0.155625  | -0.888536 |
| C  | -7.966706 | 2.360356  | -0.199429 |
| H  | -6.108584 | 3.315786  | 0.332444  |
| C  | -7.792624 | 0.105451  | -1.032280 |
| H  | -5.813989 | -0.722460 | -1.149303 |
| C  | -8.578608 | 1.207940  | -0.690469 |
| H  | -8.570623 | 3.228776  | 0.073451  |
| H  | -8.262977 | -0.803707 | -1.413509 |
| H  | -9.663826 | 1.165699  | -0.805359 |
| C  | -0.700495 | 4.415791  | 1.671096  |
| H  | -0.952933 | 4.846097  | 0.688441  |
| H  | -1.491391 | 3.699156  | 1.933822  |
| H  | -0.717897 | 5.236896  | 2.402316  |
| C  | 4.349549  | 4.700826  | 1.543868  |
| H  | 4.153328  | 5.766504  | 1.723904  |
| H  | 5.051977  | 4.344864  | 2.312389  |
| H  | 4.861295  | 4.609640  | 0.572872  |
| H  | 4.125428  | 2.022775  | 1.374119  |
| H  | -0.175029 | 1.770787  | 1.607872  |
| C  | -1.787100 | -0.179647 | 2.036798  |
| H  | -1.174648 | -0.659549 | 2.801312  |
| C  | -2.993111 | 0.208894  | 2.062094  |
| C  | -4.257774 | 0.645955  | 1.828583  |
| H  | -5.037649 | -0.107471 | 1.686176  |
| H  | -4.587903 | 1.585159  | 2.282960  |
| O  | 3.878431  | -1.599328 | -1.883493 |
| Na | 2.006085  | -1.285180 | -3.033121 |
| C  | 4.731029  | -0.761716 | -1.381871 |
| C  | 4.568302  | 0.645878  | -1.526398 |
| C  | 5.865781  | -1.190932 | -0.638046 |
| C  | 5.465525  | 1.543087  | -0.957652 |
| H  | 3.691963  | 1.009661  | -2.070241 |
| C  | 6.747784  | -0.279936 | -0.062416 |
| H  | 6.023561  | -2.266959 | -0.519254 |
| C  | 6.561258  | 1.098359  | -0.209630 |



|   |          |           |           |
|---|----------|-----------|-----------|
| H | 5.296666 | 2.616652  | -1.086971 |
| H | 7.601364 | -0.653082 | 0.511686  |
| H | 7.257897 | 1.809077  | 0.240241  |

96

Figure\_S15-1\_PA-9d(Na0Ph)-ts(1,6minor)\_02 / electronic energy: -3988.21925399 a.u. / lowest freq: -446.90 cm-1

|    |           |           |           |
|----|-----------|-----------|-----------|
| C  | -2.295989 | -1.963389 | -1.648467 |
| H  | -2.833526 | -2.697259 | -1.035686 |
| C  | -3.088636 | -0.661703 | -1.784927 |
| H  | -3.408400 | -0.457852 | -2.816617 |
| C  | -0.985258 | -0.190958 | -0.874332 |
| C  | -2.433338 | 1.729201  | -1.334833 |
| C  | -3.760087 | 2.137412  | -1.178384 |
| C  | -1.428978 | 2.690132  | -1.493179 |
| C  | -4.087277 | 3.498328  | -1.154791 |
| C  | -1.733961 | 4.050410  | -1.470640 |
| C  | -3.067138 | 4.441874  | -1.296017 |
| H  | -3.313884 | 5.507141  | -1.273605 |
| Cu | 0.708394  | 0.690252  | -0.311865 |
| N  | -1.066690 | -1.511736 | -0.990936 |
| N  | -2.120371 | 0.352504  | -1.347267 |
| C  | 2.062982  | 1.429229  | 1.151577  |
| C  | 0.793124  | 1.107244  | 1.763631  |
| H  | -2.057757 | -2.841079 | 1.131538  |
| H  | -3.974511 | -0.666276 | -1.135187 |
| H  | -2.071591 | -2.421493 | -2.623612 |
| H  | 2.152576  | 2.478165  | 0.854589  |
| C  | -0.204488 | 2.186885  | 1.911343  |
| C  | 0.507502  | -0.141443 | 2.485932  |
| O  | 0.279190  | 3.397720  | 1.614961  |
| O  | -1.368791 | 2.053712  | 2.252617  |
| O  | -0.493579 | -0.381390 | 3.140640  |
| O  | 1.470064  | -1.064881 | 2.372254  |
| C  | 1.249707  | -2.312048 | 3.028503  |
| H  | 1.141471  | -2.164287 | 4.111463  |
| H  | 2.140329  | -2.915557 | 2.820025  |
| H  | 0.348037  | -2.801413 | 2.630885  |
| C  | -0.612741 | 4.494349  | 1.752930  |
| H  | -1.528981 | 4.329967  | 1.170474  |
| H  | -0.075897 | 5.371210  | 1.376189  |
| H  | -0.878174 | 4.642660  | 2.809259  |
| C  | -0.021891 | -2.392032 | -0.476584 |
| H  | 0.387219  | -1.883397 | 0.405801  |
| C  | 1.136385  | -2.583583 | -1.437215 |
| C  | 2.437805  | -2.555321 | -0.923448 |
| C  | 0.960415  | -2.775702 | -2.809901 |
| C  | 3.541183  | -2.710897 | -1.758730 |
| H  | 2.584429  | -2.379814 | 0.145637  |
| C  | 2.063154  | -2.928143 | -3.650740 |
| H  | -0.042833 | -2.792683 | -3.239705 |
| C  | 3.356031  | -2.894868 | -3.128781 |
| H  | 4.549917  | -2.671532 | -1.340735 |
| H  | 1.909623  | -3.070751 | -4.722628 |
| H  | 4.217889  | -3.006554 | -3.790142 |
| C  | -0.603164 | -3.711094 | 0.046373  |
| H  | 0.251891  | -4.363385 | 0.286223  |
| H  | -1.154783 | -4.218471 | -0.772328 |
| O  | -1.365974 | -3.562671 | 1.198621  |
| C  | 3.247063  | 0.680637  | 1.060556  |
| H  | 3.254385  | -0.345417 | 1.419488  |
| C  | 4.382181  | 1.201418  | 0.438440  |
| H  | 4.410469  | 2.286749  | 0.309040  |
| C  | 5.714490  | 0.565934  | 0.577678  |
| C  | 6.869211  | 1.353552  | 0.467809  |
| C  | 5.869862  | -0.811361 | 0.802845  |
| C  | 8.138376  | 0.789206  | 0.588485  |
| H  | 6.768046  | 2.427244  | 0.287694  |
| C  | 7.136257  | -1.376860 | 0.920844  |
| H  | 4.989969  | -1.453917 | 0.878266  |
| C  | 8.277982  | -0.579210 | 0.815370  |
| H  | 9.023451  | 1.423912  | 0.504668  |
| H  | 7.234501  | -2.450759 | 1.094874  |
| H  | 9.270499  | -1.024967 | 0.909185  |
| C  | -0.641724 | 5.068419  | -1.668053 |
| H  | 0.309273  | 4.715125  | -1.244027 |
| H  | -0.475255 | 5.256054  | -2.740818 |
| H  | -0.896902 | 6.029285  | -1.199699 |
| C  | -5.523948 | 3.919147  | -0.985251 |
| H  | -5.612580 | 5.004014  | -0.837917 |
| H  | -6.116432 | 3.649091  | -1.873524 |
| H  | -5.985903 | 3.416670  | -0.122271 |
| H  | -4.553305 | 1.397393  | -1.056197 |
| H  | -0.396823 | 2.376613  | -1.657016 |
| C  | 1.670094  | 0.883596  | -2.092649 |
| H  | 0.980169  | 0.783998  | -2.931563 |
| C  | 2.933222  | 0.971377  | -2.063616 |
| C  | 4.253847  | 0.988031  | -1.746858 |
| H  | 4.796573  | 0.041912  | -1.832693 |
| H  | 4.841189  | 1.890093  | -1.940842 |
| O  | -3.220105 | -1.694601 | 1.258129  |

|    |           |           |          |
|----|-----------|-----------|----------|
| Na | -2.572561 | 0.112068  | 2.349233 |
| C  | -4.435020 | -2.057428 | 0.973282 |
| C  | -5.499291 | -1.115289 | 0.898068 |
| C  | -4.770151 | -3.410044 | 0.684857 |
| C  | -6.793513 | -1.499782 | 0.557500 |
| H  | -5.277896 | -0.063901 | 1.110982 |
| C  | -6.068049 | -3.779696 | 0.344724 |
| H  | -3.973916 | -4.157016 | 0.749503 |
| C  | -7.096015 | -2.834368 | 0.273642 |
| H  | -7.580861 | -0.741547 | 0.510987 |
| H  | -6.282860 | -4.831535 | 0.133046 |
| H  | -8.112389 | -3.131962 | 0.007207 |

96

Figure\_S15-1\_PA-9d(NaOPh)-ts(1,6minor)\_03 / electronic energy: -3988.21926870 a.u. / lowest freq: -449.72 cm-1

|    |           |           |           |
|----|-----------|-----------|-----------|
| C  | 2.298140  | -1.963367 | 1.647079  |
| H  | 2.835681  | -2.697003 | 1.034036  |
| C  | 3.090092  | -0.661164 | 1.782858  |
| H  | 3.409303  | -0.456559 | 2.814578  |
| C  | 0.985889  | -0.191927 | 0.873198  |
| C  | 2.432082  | 1.729481  | 1.334852  |
| C  | 3.760261  | 2.139148  | 1.180232  |
| C  | 1.427541  | 2.688848  | 1.489719  |
| C  | 4.086030  | 3.498953  | 1.156582  |
| C  | 1.731565  | 4.050627  | 1.465240  |
| C  | 3.063260  | 4.442648  | 1.292886  |
| H  | 3.309222  | 5.508147  | 1.267216  |
| Cu | -0.708295 | 0.688615  | 0.311530  |
| N  | 1.068113  | -1.512587 | 0.990343  |
| N  | 2.121431  | 0.352346  | 1.344214  |
| C  | -2.063981 | 1.428392  | -1.151909 |
| C  | -0.794205 | 1.106224  | -1.764336 |
| H  | 2.058776  | -2.842464 | -1.132259 |
| H  | 3.976246  | -0.665671 | 1.133512  |
| H  | 2.074695  | -2.421495 | 2.622432  |
| H  | -2.153132 | 2.477327  | -0.854726 |
| C  | 0.203094  | 2.185824  | -1.913252 |
| C  | -0.508662 | -0.142822 | -2.485765 |
| O  | -0.280889 | 3.397101  | -1.618748 |
| O  | 1.367481  | 2.052556  | -2.254240 |
| O  | 0.492303  | -0.383249 | -3.140542 |
| O  | -1.471203 | -1.066301 | -2.371284 |
| C  | -1.250989 | -2.313729 | -3.027020 |
| H  | -1.143346 | -2.166498 | -4.110116 |
| H  | -2.141388 | -2.917315 | -2.817788 |
| H  | -0.349024 | -2.802822 | -2.629740 |
| C  | 0.610910  | 4.493587  | -1.758764 |
| H  | 1.525645  | 4.332025  | -1.173123 |
| H  | 0.072620  | 5.371715  | -1.387040 |
| H  | 0.879212  | 4.637860  | -2.814917 |
| C  | 0.023543  | -2.393570 | 0.476646  |
| H  | -0.386054 | -1.885461 | -0.405812 |
| C  | -1.134291 | -2.585091 | 1.437795  |
| C  | -2.435986 | -2.556228 | 0.924769  |
| C  | -0.957590 | -2.777743 | 2.810320  |
| C  | -3.538931 | -2.711782 | 1.760638  |
| H  | -2.583166 | -2.380265 | -0.144162 |
| C  | -2.059892 | -2.930120 | 3.651738  |
| H  | 0.045917  | -2.795243 | 3.239512  |
| C  | -3.353060 | -2.896272 | 3.130517  |
| H  | -4.547896 | -2.672031 | 1.343226  |
| H  | -1.905809 | -3.073146 | 4.723491  |
| H  | -4.214569 | -3.007939 | 3.792335  |
| C  | 0.605144  | -3.712624 | -0.045955 |
| H  | -0.249756 | -4.365378 | -0.285092 |
| H  | 1.157354  | -4.219403 | 0.772722  |
| O  | 1.367333  | -3.564430 | -1.198640 |
| C  | -3.247577 | 0.679948  | -1.059320 |
| H  | -3.255475 | -0.346185 | -1.418043 |
| C  | -4.382212 | 1.201036  | -0.435457 |
| H  | -4.410236 | 2.286572  | -0.307436 |
| C  | -5.714992 | 0.566353  | -0.575113 |
| C  | -6.869260 | 1.354664  | -0.465633 |
| C  | -5.871110 | -0.810873 | -0.800092 |
| C  | -8.138734 | 0.791041  | -0.586509 |
| H  | -6.767511 | 2.428331  | -0.285689 |
| C  | -7.137814 | -1.375657 | -0.918301 |
| H  | -4.991580 | -1.453963 | -0.875235 |
| C  | -8.279091 | -0.577324 | -0.813222 |
| H  | -9.023447 | 1.426295  | -0.503013 |
| H  | -7.236644 | -2.449521 | -1.092211 |
| H  | -9.271848 | -1.022513 | -0.907221 |
| C  | -1.668504 | 0.881852  | 2.093989  |
| H  | -0.976982 | 0.781950  | 2.931434  |
| C  | -2.931284 | 0.969954  | 2.064341  |
| C  | -4.252244 | 0.986891  | 1.747009  |
| H  | -4.794811 | 0.040776  | 1.834135  |
| H  | -4.839375 | 1.888638  | 1.943204  |
| O  | 3.220475  | -1.695321 | -1.259818 |
| Na | 2.571591  | 0.111179  | -2.350598 |

|   |           |           |           |
|---|-----------|-----------|-----------|
| C | 4.435849  | -2.056756 | -0.975202 |
| C | 5.499110  | -1.113418 | -0.900386 |
| C | 4.772543  | -3.408956 | -0.686617 |
| C | 6.793859  | -1.496464 | -0.560200 |
| H | 5.276522  | -0.062287 | -1.113279 |
| C | 6.070955  | -3.777135 | -0.346836 |
| H | 3.977094  | -4.156797 | -0.750861 |
| C | 7.097912  | -2.830684 | -0.276245 |
| H | 7.580412  | -0.737375 | -0.514057 |
| H | 6.286965  | -4.828708 | -0.135045 |
| H | 8.114705  | -3.127122 | -0.010120 |
| C | 0.636377  | 5.066676  | 1.656462  |
| H | -0.309936 | 4.714225  | 1.221352  |
| H | 0.459006  | 5.248908  | 2.728395  |
| H | 0.895076  | 6.029863  | 1.194927  |
| C | 5.521242  | 3.933053  | 1.010110  |
| H | 6.001001  | 4.022145  | 1.998112  |
| H | 6.104854  | 3.207764  | 0.425729  |
| H | 5.595863  | 4.913427  | 0.519108  |
| H | 0.394916  | 2.375269  | 1.650410  |
| H | 4.553224  | 1.399020  | 1.058543  |

96

Figure\_S15-1\_PA-9d(Na0Ph)-ts(1,6minor)\_04 / electronic energy: -3988.21743768 a.u. / lowest freq: -446.62 cm-1

|    |           |           |           |
|----|-----------|-----------|-----------|
| C  | -2.140802 | -2.213680 | -1.811121 |
| H  | -2.622075 | -2.970061 | -1.176968 |
| C  | -3.033356 | -0.985629 | -2.000461 |
| H  | -3.199607 | -0.734898 | -3.059247 |
| C  | -1.083525 | -0.352943 | -0.869841 |
| C  | -2.748936 | 1.407855  | -1.308514 |
| C  | -4.094293 | 1.654506  | -1.593376 |
| C  | -1.907705 | 2.491316  | -1.016607 |
| C  | -4.608401 | 2.956831  | -1.567909 |
| C  | -2.395617 | 3.795699  | -1.006099 |
| C  | -3.753057 | 4.017898  | -1.272726 |
| H  | -4.144936 | 5.039002  | -1.257673 |
| Cu | 0.505797  | 0.601513  | -0.138009 |
| N  | -0.973116 | -1.648496 | -1.136799 |
| N  | -2.263216 | 0.085138  | -1.350918 |
| C  | 1.852159  | 1.266393  | 1.339746  |
| C  | 0.727701  | 0.622569  | 1.989432  |
| H  | -1.562517 | -3.257919 | 0.945994  |
| H  | -4.007010 | -1.120889 | -1.511993 |
| H  | -1.866200 | -2.686809 | -2.764665 |
| H  | 1.735479  | 2.347659  | 1.221969  |
| C  | -0.426152 | 1.449002  | 2.386080  |
| C  | 0.794405  | -0.722464 | 2.583004  |
| O  | -0.277986 | 2.746860  | 2.084874  |
| O  | -1.452886 | 1.055104  | 2.915192  |
| O  | 0.073078  | -1.156919 | 3.464195  |
| O  | 1.760559  | -1.497070 | 2.072128  |
| C  | 1.830980  | -2.837800 | 2.551588  |
| H  | 1.954545  | -2.856859 | 3.642318  |
| H  | 2.708521  | -3.281344 | 2.067522  |
| H  | 0.919114  | -3.384945 | 2.267069  |
| C  | -1.361012 | 3.603830  | 2.414807  |
| H  | -2.251753 | 3.350284  | 1.821976  |
| H  | -1.027642 | 4.618649  | 2.175062  |
| H  | -1.604221 | 3.529136  | 3.483308  |
| C  | 0.196492  | -2.420362 | -0.736281 |
| H  | 0.553995  | -1.964253 | 0.195451  |
| C  | 1.333213  | -2.317861 | -1.739509 |
| C  | 2.644908  | -2.212979 | -1.263488 |
| C  | 1.118793  | -2.296866 | -3.120246 |
| C  | 3.717764  | -2.085749 | -2.142715 |
| H  | 2.819895  | -2.199376 | -0.185384 |
| C  | 2.190064  | -2.169636 | -4.004191 |
| H  | 0.105810  | -2.359422 | -3.521591 |
| C  | 3.492752  | -2.060756 | -3.518740 |
| H  | 4.732898  | -1.987453 | -1.750796 |
| H  | 2.003547  | -2.147018 | -5.080163 |
| H  | 4.329592  | -1.951181 | -4.211855 |
| C  | -0.166433 | -3.865740 | -0.378670 |
| H  | 0.785543  | -4.407710 | -0.252240 |
| H  | -0.670479 | -4.337928 | -1.247902 |
| O  | -0.899470 | -3.992837 | 0.795519  |
| C  | 3.135309  | 0.765031  | 1.068359  |
| H  | 3.334308  | -0.289295 | 1.243020  |
| C  | 4.121856  | 1.564085  | 0.492033  |
| H  | 3.961784  | 2.644673  | 0.540471  |
| C  | 5.547299  | 1.155866  | 0.459906  |
| C  | 6.544558  | 2.138453  | 0.383564  |
| C  | 5.944416  | -0.190742 | 0.485864  |
| C  | 7.894399  | 1.792205  | 0.341750  |
| H  | 6.255429  | 3.192699  | 0.357095  |
| C  | 7.291669  | -0.538513 | 0.442104  |
| H  | 5.191458  | -0.979991 | 0.533969  |
| C  | 8.274354  | 0.450999  | 0.369763  |
| H  | 8.653327  | 2.575769  | 0.286351  |
| H  | 7.577288  | -1.592781 | 0.463041  |

|    |           |           |           |
|----|-----------|-----------|-----------|
| H  | 9.330865  | 0.176731  | 0.333978  |
| C  | -1.462165 | 4.951488  | -0.755938 |
| H  | -0.500139 | 4.608920  | -0.349848 |
| H  | -1.256721 | 5.491343  | -1.693894 |
| H  | -1.899168 | 5.676154  | -0.052951 |
| C  | -6.067213 | 3.186205  | -1.867546 |
| H  | -6.356835 | 4.229787  | -1.683544 |
| H  | -6.292201 | 2.953370  | -2.920206 |
| H  | -6.705233 | 2.537514  | -1.248329 |
| H  | -4.772040 | 0.829716  | -1.812909 |
| H  | -0.848766 | 2.328518  | -0.817885 |
| C  | 1.298910  | 1.271742  | -1.894641 |
| H  | 0.547438  | 1.242268  | -2.683908 |
| C  | 2.540393  | 1.516210  | -1.928999 |
| C  | 3.869256  | 1.661955  | -1.690659 |
| H  | 4.522002  | 0.826858  | -1.963050 |
| H  | 4.320757  | 2.655826  | -1.758073 |
| O  | -2.566788 | -2.100452 | 1.494938  |
| Na | -2.176578 | -1.055364 | 3.418386  |
| C  | -3.785721 | -1.929218 | 1.080852  |
| C  | -4.415122 | -0.653312 | 1.127964  |
| C  | -4.562034 | -2.995942 | 0.546147  |
| C  | -5.711956 | -0.463191 | 0.660243  |
| H  | -3.834207 | 0.196820  | 1.499576  |
| C  | -5.852079 | -2.788298 | 0.068366  |
| H  | -4.106742 | -3.990165 | 0.512011  |
| C  | -6.445750 | -1.521695 | 0.116173  |
| H  | -6.151713 | 0.537703  | 0.703744  |
| H  | -6.409431 | -3.633120 | -0.347444 |
| H  | -7.459345 | -1.365437 | -0.258936 |

96

Figure\_S15-1\_PA-9d(NaOPh)-ts(1,6minor)\_05 / electronic energy: -3988.21946363 a.u. / lowest freq: -425.99 cm-1

|    |           |           |           |
|----|-----------|-----------|-----------|
| C  | -1.096829 | -2.912236 | -0.846531 |
| H  | -1.534559 | -3.584789 | -0.097249 |
| C  | -2.171342 | -2.164273 | -1.636288 |
| H  | -2.040406 | -2.288037 | -2.721613 |
| C  | -0.859637 | -0.615755 | -0.460516 |
| C  | -2.819104 | 0.258138  | -1.644006 |
| C  | -3.675425 | 0.053039  | -2.727106 |
| C  | -2.891276 | 1.461563  | -0.927752 |
| C  | -4.600727 | 1.033630  | -3.105476 |
| C  | -3.806722 | 2.447597  | -1.288199 |
| C  | -4.654353 | 2.224066  | -2.382034 |
| H  | -5.382294 | 2.991088  | -2.661221 |
| Cu | 0.243309  | 1.019773  | -0.205517 |
| N  | -0.364005 | -1.821899 | -0.201652 |
| N  | -1.940114 | -0.766313 | -1.250453 |
| C  | 1.712283  | 2.201493  | 0.701641  |
| C  | 0.636907  | 1.999655  | 1.645853  |
| H  | -1.240628 | -1.972701 | 2.296911  |
| H  | -3.191483 | -2.470711 | -1.362767 |
| H  | -0.419862 | -3.494115 | -1.489833 |
| H  | 1.709891  | 3.177636  | 0.210899  |
| C  | -0.396837 | 3.053631  | 1.728587  |
| C  | 0.673379  | 1.059709  | 2.773596  |
| O  | 0.009086  | 4.217994  | 1.219441  |
| O  | -1.519216 | 2.923576  | 2.194518  |
| O  | -0.190558 | 0.943085  | 3.628778  |
| O  | 1.793218  | 0.335791  | 2.830789  |
| C  | 1.918758  | -0.577570 | 3.917436  |
| H  | 1.949356  | -0.036067 | 4.873219  |
| H  | 2.869181  | -1.098263 | 3.755038  |
| H  | 1.076383  | -1.282365 | 3.909269  |
| C  | -0.904822 | 5.304347  | 1.217580  |
| H  | -1.708906 | 5.133390  | 0.490749  |
| H  | -0.325382 | 6.186928  | 0.926543  |
| H  | -1.342677 | 5.449584  | 2.214027  |
| C  | 0.812870  | -2.078275 | 0.609097  |
| H  | 1.095888  | -1.104602 | 1.037300  |
| C  | 1.976085  | -2.564090 | -0.254059 |
| C  | 2.916104  | -3.497868 | 0.196103  |
| C  | 2.144868  | -2.020495 | -1.535777 |
| C  | 3.990684  | -3.878208 | -0.611208 |
| H  | 2.825476  | -3.948599 | 1.184866  |
| C  | 3.214233  | -2.400315 | -2.342389 |
| H  | 1.435994  | -1.277552 | -1.906643 |
| C  | 4.143829  | -3.333368 | -1.883290 |
| H  | 4.710465  | -4.610022 | -0.237775 |
| H  | 3.323757  | -1.959001 | -3.335570 |
| H  | 4.985586  | -3.629383 | -2.512750 |
| C  | 0.453413  | -2.976746 | 1.799957  |
| H  | 1.379775  | -3.195822 | 2.352026  |
| H  | 0.082723  | -3.951983 | 1.420721  |
| O  | -0.421881 | -2.386388 | 2.699841  |
| C  | 2.825817  | 1.386067  | 0.430407  |
| H  | 2.909665  | 0.411588  | 0.909133  |
| C  | 3.814702  | 1.790963  | -0.468200 |
| H  | 3.861259  | 2.860395  | -0.685727 |
| C  | 5.107728  | 1.080781  | -0.588441 |

|    |           |           |           |
|----|-----------|-----------|-----------|
| C  | 6.246719  | 1.793606  | -0.991564 |
| C  | 5.240041  | -0.290549 | -0.318399 |
| C  | 7.483756  | 1.163136  | -1.110115 |
| H  | 6.158618  | 2.861240  | -1.210610 |
| C  | 6.475323  | -0.920742 | -0.438713 |
| H  | 4.367101  | -0.881838 | -0.032909 |
| C  | 7.603413  | -0.198469 | -0.832653 |
| H  | 8.358621  | 1.738771  | -1.420907 |
| H  | 6.553259  | -1.990322 | -0.231278 |
| H  | 8.570669  | -0.696640 | -0.927658 |
| C  | -3.902547 | 3.728092  | -0.501764 |
| H  | -3.443688 | 4.562977  | -1.056059 |
| H  | -4.951878 | 4.001280  | -0.317770 |
| H  | -3.390496 | 3.639268  | 0.466176  |
| C  | -5.536993 | 0.774450  | -4.257006 |
| H  | -6.076811 | 1.685139  | -4.550324 |
| H  | -4.993657 | 0.397915  | -5.136369 |
| H  | -6.283824 | 0.011746  | -3.985450 |
| H  | -3.643671 | -0.883084 | -3.285850 |
| H  | -2.262041 | 1.607040  | -0.048830 |
| C  | 0.612428  | 1.396670  | -2.184933 |
| H  | -0.326873 | 1.334800  | -2.737558 |
| C  | 1.821096  | 1.497923  | -2.546337 |
| C  | 3.176994  | 1.524784  | -2.605313 |
| H  | 3.699429  | 0.588490  | -2.825555 |
| H  | 3.688633  | 2.439231  | -2.916920 |
| O  | -2.625449 | -1.160220 | 2.015709  |
| Na | -2.361972 | 0.830469  | 2.905204  |
| C  | -3.575124 | -1.831311 | 1.437574  |
| C  | -4.635207 | -1.190926 | 0.738681  |
| C  | -3.603143 | -3.254195 | 1.454394  |
| C  | -5.613524 | -1.919779 | 0.070573  |
| H  | -4.645911 | -0.098033 | 0.701680  |
| C  | -4.586422 | -3.972391 | 0.780289  |
| H  | -2.814579 | -3.772121 | 2.008696  |
| C  | -5.599866 | -3.318716 | 0.071925  |
| H  | -6.398542 | -1.384052 | -0.471876 |
| H  | -4.562320 | -5.066099 | 0.809290  |
| H  | -6.367457 | -3.886485 | -0.458326 |

96

Figure\_S15-1\_PA-9d(NaOPh)-ts(1,6minor)\_06 / electronic energy: -3988.21636174 a.u. / lowest freq: -441.94 cm-1

|    |           |           |           |
|----|-----------|-----------|-----------|
| C  | -1.200470 | -2.842007 | -0.565079 |
| H  | -1.703377 | -3.344902 | 0.273895  |
| C  | -2.196096 | -2.124749 | -1.476300 |
| H  | -1.983459 | -2.304867 | -2.541941 |
| C  | -0.858092 | -0.537621 | -0.398222 |
| C  | -2.793529 | 0.313561  | -1.634209 |
| C  | -2.793878 | 1.583951  | -1.042819 |
| C  | -3.671209 | 0.047661  | -2.687499 |
| C  | -3.657825 | 2.578898  | -1.498025 |
| C  | -4.550822 | 1.031097  | -3.152471 |
| C  | -4.532899 | 2.290860  | -2.552537 |
| H  | -5.224096 | 3.062838  | -2.902107 |
| Cu | 0.346694  | 1.036362  | -0.232428 |
| N  | -0.379823 | -1.734436 | -0.077179 |
| N  | -1.960217 | -0.711151 | -1.151185 |
| C  | 1.912179  | 2.157692  | 0.600373  |
| C  | 0.899316  | 1.967173  | 1.612557  |
| H  | -1.468459 | -1.894648 | 2.368724  |
| H  | -3.238389 | -2.402073 | -1.267910 |
| H  | -0.581007 | -3.576466 | -1.098817 |
| H  | 1.892791  | 3.123845  | 0.088700  |
| C  | -0.144174 | 3.009102  | 1.741973  |
| C  | 1.121239  | 1.030358  | 2.724588  |
| O  | 0.258061  | 4.205310  | 1.319292  |
| O  | -1.281782 | 2.829922  | 2.153200  |
| O  | 2.060661  | 0.266873  | 2.823369  |
| O  | 0.187902  | 1.110063  | 3.695859  |
| C  | 0.407083  | 0.311908  | 4.857538  |
| H  | 0.294205  | -0.749669 | 4.603862  |
| H  | -0.363035 | 0.616518  | 5.575138  |
| H  | 1.405310  | 0.500754  | 5.273883  |
| C  | -0.693083 | 5.260890  | 1.315995  |
| H  | -1.494613 | 5.056111  | 0.594991  |
| H  | -0.145341 | 6.161184  | 1.018921  |
| H  | -1.130792 | 5.395109  | 2.314113  |
| C  | 0.791263  | -1.942768 | 0.751478  |
| H  | 1.143930  | -0.937912 | 1.021830  |
| C  | 1.914510  | -2.611823 | -0.028181 |
| C  | 2.808737  | -3.509940 | 0.563413  |
| C  | 2.109151  | -2.266119 | -1.373434 |
| C  | 3.867285  | -4.050297 | -0.170340 |
| H  | 2.694155  | -3.799134 | 1.608892  |
| C  | 3.161407  | -2.807530 | -2.106719 |
| H  | 1.434908  | -1.550133 | -1.849364 |
| C  | 4.046382  | -3.704651 | -1.507452 |
| H  | 4.554270  | -4.748986 | 0.312160  |
| H  | 3.295141  | -2.522064 | -3.152492 |
| H  | 4.875510  | -4.126512 | -2.079197 |

|    |           |           |           |
|----|-----------|-----------|-----------|
| C  | 0.397390  | -2.604323 | 2.078503  |
| H  | 1.296685  | -2.651843 | 2.710175  |
| H  | 0.069716  | -3.647984 | 1.900987  |
| O  | -0.555253 | -1.862564 | 2.769369  |
| C  | 2.998244  | 1.313154  | 0.310226  |
| H  | 3.083753  | 0.367280  | 0.844161  |
| C  | 3.947742  | 1.642881  | -0.659080 |
| H  | 4.006421  | 2.696765  | -0.942226 |
| C  | 5.219447  | 0.894763  | -0.790439 |
| C  | 6.358192  | 1.552904  | -1.276739 |
| C  | 5.325654  | -0.464735 | -0.455516 |
| C  | 7.571603  | 0.881086  | -1.413856 |
| H  | 6.289635  | 2.610152  | -1.547293 |
| C  | 6.536553  | -1.136409 | -0.595365 |
| H  | 4.449696  | -1.014029 | -0.103057 |
| C  | 7.665820  | -0.467904 | -1.072626 |
| H  | 8.447594  | 1.413966  | -1.790500 |
| H  | 6.593823  | -2.196198 | -0.336610 |
| H  | 8.614546  | -0.997759 | -1.182187 |
| C  | 0.662726  | 1.286349  | -2.236730 |
| H  | -0.291813 | 1.239943  | -2.763959 |
| C  | 1.865436  | 1.292490  | -2.630697 |
| C  | 3.219242  | 1.239586  | -2.724933 |
| H  | 3.766312  | 2.095428  | -3.129141 |
| H  | 3.681864  | 0.261109  | -2.890091 |
| Na | -1.937746 | 0.600438  | 2.528212  |
| O  | -2.934374 | -1.284922 | 2.015422  |
| C  | -3.917617 | -1.829630 | 1.365769  |
| C  | -4.117553 | -3.237638 | 1.345617  |
| C  | -4.839291 | -1.053336 | 0.611975  |
| C  | -5.128022 | -3.820145 | 0.585227  |
| H  | -3.442811 | -3.860619 | 1.940949  |
| C  | -5.844827 | -1.646414 | -0.143997 |
| H  | -4.715211 | 0.033046  | 0.603696  |
| C  | -5.999283 | -3.036215 | -0.177401 |
| H  | -5.238658 | -4.908797 | 0.587503  |
| H  | -6.514861 | -1.009950 | -0.729928 |
| H  | -6.787675 | -3.497574 | -0.775943 |
| H  | -3.695418 | -0.939705 | -3.149883 |
| H  | -2.138597 | 1.795958  | -0.196782 |
| C  | -5.515391 | 0.707501  | -4.263376 |
| H  | -6.274975 | -0.012349 | -3.919700 |
| H  | -6.037527 | 1.606111  | -4.618973 |
| H  | -4.998255 | 0.249065  | -5.119509 |
| C  | -3.645025 | 3.941670  | -0.857344 |
| H  | -2.897470 | 4.591594  | -1.340903 |
| H  | -4.620616 | 4.438634  | -0.950225 |
| H  | -3.389252 | 3.873416  | 0.209615  |

96

Figure\_S15-1\_PA-9d(NaO<sub>4</sub>Ph)-ts(1,6minor)\_07 / electronic energy: -3988.21954606 a.u. / lowest freq: -424.42 cm<sup>-1</sup>

|    |           |           |           |
|----|-----------|-----------|-----------|
| C  | -1.019663 | -2.889396 | -0.963671 |
| H  | -1.437576 | -3.606749 | -0.245238 |
| C  | -2.117156 | -2.140358 | -1.724803 |
| H  | -1.995357 | -2.236454 | -2.813632 |
| C  | -0.839916 | -0.602955 | -0.498503 |
| C  | -2.811326 | 0.275380  | -1.640159 |
| C  | -3.011044 | 1.358568  | -0.772141 |
| C  | -3.559952 | 0.181675  | -2.812588 |
| C  | -3.962788 | 2.332152  | -1.065363 |
| C  | -4.506814 | 1.163252  | -3.135296 |
| C  | -4.698195 | 2.226961  | -2.255217 |
| H  | -5.450557 | 2.986552  | -2.486617 |
| Cu | 0.233067  | 1.039129  | -0.197854 |
| N  | -0.319707 | -1.805413 | -0.271771 |
| N  | -1.907324 | -0.749289 | -1.302200 |
| C  | 1.671770  | 2.221811  | 0.741026  |
| C  | 0.585915  | 1.995019  | 1.670707  |
| H  | -1.216623 | -1.917645 | 2.225082  |
| H  | -3.128654 | -2.471570 | -1.447657 |
| H  | -0.324807 | -3.421503 | -1.630687 |
| H  | 1.661451  | 3.200706  | 0.256771  |
| C  | -0.491831 | 3.002939  | 1.708169  |
| C  | 0.630846  | 1.053880  | 2.798222  |
| O  | -0.152810 | 4.145606  | 1.106044  |
| O  | -1.600213 | 2.854930  | 2.203434  |
| O  | -0.239095 | 0.911470  | 3.643064  |
| O  | 1.769211  | 0.360553  | 2.867521  |
| C  | 1.908274  | -0.548396 | 3.955321  |
| H  | 1.920293  | -0.005601 | 4.910922  |
| H  | 2.870984  | -1.048325 | 3.800095  |
| H  | 1.082039  | -1.271154 | 3.941696  |
| C  | -1.133871 | 5.164283  | 0.991305  |
| H  | -1.887219 | 4.888743  | 0.241787  |
| H  | -0.601172 | 6.063677  | 0.664627  |
| H  | -1.628646 | 5.344676  | 1.954624  |
| C  | 0.849414  | -2.051625 | 0.552896  |
| H  | 1.123132  | -1.072246 | 0.974744  |
| C  | 2.024277  | -2.534839 | -0.292877 |
| C  | 2.953985  | -3.475569 | 0.162843  |

|    |           |           |           |
|----|-----------|-----------|-----------|
| C  | 2.215501  | -1.975123 | -1.564556 |
| C  | 4.043183  | -3.846177 | -0.629560 |
| H  | 2.843987  | -3.938061 | 1.144340  |
| C  | 3.298506  | -2.346083 | -2.356511 |
| H  | 1.512258  | -1.226676 | -1.936210 |
| C  | 4.219432  | -3.285174 | -1.891565 |
| H  | 4.756021  | -4.582990 | -0.252648 |
| H  | 3.426477  | -1.893256 | -3.342282 |
| H  | 5.072582  | -3.573826 | -2.509048 |
| C  | 0.477801  | -2.929401 | 1.754131  |
| H  | 1.398356  | -3.152179 | 2.314538  |
| H  | 0.092152  | -3.904617 | 1.390171  |
| O  | -0.392240 | -2.307725 | 2.638647  |
| C  | 2.800813  | 1.424611  | 0.479451  |
| H  | 2.891034  | 0.447007  | 0.950633  |
| C  | 3.796375  | 1.848821  | -0.402796 |
| H  | 3.835211  | 2.920832  | -0.608626 |
| C  | 5.096672  | 1.151186  | -0.518562 |
| C  | 6.232828  | 1.877941  | -0.904810 |
| C  | 5.239037  | -0.221944 | -0.262560 |
| C  | 7.476081  | 1.259293  | -1.020619 |
| H  | 6.137323  | 2.947062  | -1.113234 |
| C  | 6.480653  | -0.840217 | -0.379699 |
| H  | 4.369265  | -0.824543 | 0.008790  |
| C  | 7.605480  | -0.104147 | -0.756987 |
| H  | 8.348262  | 1.845744  | -1.318572 |
| H  | 6.566195  | -1.911237 | -0.183065 |
| H  | 8.577604  | -0.593145 | -0.850009 |
| C  | 0.615229  | 1.451333  | -2.165916 |
| H  | -0.319602 | 1.389204  | -2.726014 |
| C  | 1.827383  | 1.565566  | -2.510896 |
| C  | 3.183744  | 1.603372  | -2.551890 |
| H  | 3.692296  | 2.525682  | -2.844708 |
| H  | 3.716345  | 0.674132  | -2.777795 |
| Na | -2.413908 | 0.767180  | 2.946974  |
| O  | -2.635849 | -1.157144 | 1.921567  |
| C  | -3.534677 | -1.906330 | 1.358500  |
| C  | -3.446473 | -3.326685 | 1.384727  |
| C  | -4.652163 | -1.360099 | 0.668986  |
| C  | -4.372138 | -4.128592 | 0.723841  |
| H  | -2.614801 | -3.774701 | 1.936554  |
| C  | -5.573222 | -2.172626 | 0.015627  |
| H  | -4.756030 | -0.272769 | 0.631388  |
| C  | -5.442605 | -3.565485 | 0.022005  |
| H  | -4.256771 | -5.216238 | 0.759491  |
| H  | -6.408183 | -1.707783 | -0.517502 |
| H  | -6.165190 | -4.197928 | -0.498140 |
| H  | -3.416799 | -0.660983 | -3.491263 |
| H  | -2.458293 | 1.400748  | 0.166879  |
| C  | -5.291163 | 1.054427  | -4.416943 |
| H  | -6.068065 | 1.828255  | -4.480789 |
| H  | -4.630251 | 1.165301  | -5.290862 |
| H  | -5.777723 | 0.070979  | -4.501511 |
| C  | -4.256307 | 3.443312  | -0.091685 |
| H  | -4.178746 | 4.428864  | -0.576410 |
| H  | -5.284578 | 3.355795  | 0.293168  |
| H  | -3.567759 | 3.418526  | 0.763347  |

96

Figure\_S15-1\_PA-9d(NaOPh)-ts(1,6minor)\_08 / electronic energy: -3988.21575574 a.u. / lowest freq: -451.85 cm<sup>-1</sup>

|    |           |           |           |
|----|-----------|-----------|-----------|
| C  | -2.165913 | -2.012204 | -1.688241 |
| H  | -2.697437 | -2.750637 | -1.075101 |
| C  | -2.990201 | -0.735201 | -1.862504 |
| H  | -3.279315 | -0.548118 | -2.906477 |
| C  | -0.931545 | -0.195036 | -0.891983 |
| C  | -2.441698 | 1.672906  | -1.378610 |
| C  | -3.798312 | 2.018365  | -1.339919 |
| C  | -1.477009 | 2.683117  | -1.403591 |
| C  | -4.190533 | 3.359428  | -1.307511 |
| C  | -1.847338 | 4.028915  | -1.351432 |
| C  | -3.206528 | 4.353832  | -1.307216 |
| H  | -3.505474 | 5.405169  | -1.268853 |
| Cu | 0.731462  | 0.726643  | -0.310520 |
| N  | -0.965519 | -1.517601 | -1.010283 |
| N  | -2.070264 | 0.311535  | -1.398396 |
| C  | 2.069556  | 1.518022  | 1.135574  |
| C  | 0.812230  | 1.174446  | 1.759843  |
| H  | -1.960772 | -2.847132 | 1.104221  |
| H  | -3.897407 | -0.761891 | -1.243891 |
| H  | -1.908473 | -2.479657 | -2.650431 |
| H  | 2.118370  | 2.569305  | 0.831166  |
| C  | -0.155372 | 2.294384  | 1.830019  |
| C  | 0.585730  | -0.042993 | 2.540843  |
| O  | -1.422913 | 1.943784  | 2.133170  |
| O  | 0.121646  | 3.448327  | 1.579640  |
| O  | -0.343553 | -0.245898 | 3.308698  |
| O  | 1.518608  | -0.984895 | 2.357922  |
| C  | 1.346455  | -2.217859 | 3.052868  |
| H  | 1.271634  | -2.047864 | 4.135051  |
| H  | 2.240063  | -2.810594 | 2.826907  |

|    |           |           |           |
|----|-----------|-----------|-----------|
| H  | 0.443677  | -2.733844 | 2.692192  |
| C  | -2.376508 | 3.002060  | 2.152009  |
| H  | -2.080842 | 3.779916  | 2.868270  |
| H  | -3.327978 | 2.553131  | 2.459977  |
| H  | -2.482288 | 3.445469  | 1.153438  |
| C  | 0.096780  | -2.361006 | -0.470491 |
| H  | 0.481414  | -1.825156 | 0.407048  |
| C  | 1.270167  | -2.535149 | -1.416498 |
| C  | 2.565353  | -2.457759 | -0.891965 |
| C  | 1.113701  | -2.751858 | -2.787988 |
| C  | 3.680739  | -2.587991 | -1.715714 |
| H  | 2.696926  | -2.262856 | 0.175692  |
| C  | 2.228269  | -2.878295 | -3.617329 |
| H  | 0.116002  | -2.808233 | -3.226918 |
| C  | 3.514440  | -2.795106 | -3.084803 |
| H  | 4.683863  | -2.509014 | -1.289941 |
| H  | 2.088822  | -3.038825 | -4.688600 |
| H  | 4.385744  | -2.885604 | -3.736964 |
| C  | -0.454840 | -3.685655 | 0.070022  |
| H  | 0.414085  | -4.308512 | 0.336618  |
| H  | -0.980013 | -4.224765 | -0.745623 |
| O  | -1.240416 | -3.534569 | 1.207479  |
| C  | 3.271643  | 0.800463  | 1.045902  |
| H  | 3.305432  | -0.222518 | 1.412981  |
| C  | 4.390708  | 1.341478  | 0.410717  |
| H  | 4.393570  | 2.426370  | 0.274952  |
| C  | 5.737576  | 0.736369  | 0.548616  |
| C  | 6.875218  | 1.545936  | 0.421976  |
| C  | 5.923144  | -0.634615 | 0.788138  |
| C  | 8.156467  | 1.008563  | 0.539262  |
| H  | 6.750997  | 2.615378  | 0.231481  |
| C  | 7.201454  | -1.173436 | 0.902508  |
| H  | 5.057310  | -1.294192 | 0.877769  |
| C  | 8.325868  | -0.354149 | 0.779531  |
| H  | 9.027508  | 1.660579  | 0.442175  |
| H  | 7.322504  | -2.243233 | 1.087190  |
| H  | 9.327948  | -0.778668 | 0.870401  |
| C  | -0.781336 | 5.089192  | -1.299481 |
| H  | -0.015510 | 4.922515  | -2.071643 |
| H  | -1.201741 | 6.094728  | -1.437217 |
| H  | -0.276478 | 5.049069  | -0.321889 |
| C  | -5.653097 | 3.720896  | -1.291305 |
| H  | -5.822343 | 4.683923  | -0.789555 |
| H  | -6.042395 | 3.811908  | -2.318206 |
| H  | -6.251817 | 2.953345  | -0.780473 |
| H  | -4.563931 | 1.241443  | -1.322067 |
| H  | -0.418037 | 2.428494  | -1.472758 |
| C  | 1.670647  | 0.957432  | -2.101070 |
| H  | 0.969858  | 0.856474  | -2.930447 |
| C  | 2.931706  | 1.065994  | -2.078300 |
| C  | 4.253887  | 1.109106  | -1.766579 |
| H  | 4.815108  | 0.174120  | -1.857258 |
| H  | 4.820950  | 2.022523  | -1.967539 |
| O  | -3.136027 | -1.716962 | 1.204518  |
| Na | -2.481458 | -0.200666 | 2.643950  |
| C  | -4.354798 | -2.049394 | 0.897361  |
| C  | -5.394466 | -1.081748 | 0.809089  |
| C  | -4.714594 | -3.392355 | 0.598078  |
| C  | -6.691658 | -1.436102 | 0.447130  |
| H  | -5.149389 | -0.035694 | 1.022825  |
| C  | -6.014803 | -3.731623 | 0.235665  |
| H  | -3.935884 | -4.156986 | 0.671612  |
| C  | -7.019502 | -2.762605 | 0.153335  |
| H  | -7.461191 | -0.660479 | 0.390024  |
| H  | -6.249854 | -4.777325 | 0.015532  |
| H  | -8.037993 | -3.035799 | -0.130451 |

32

Figure\_S15-2\_dienoate / electronic energy: -841.927078481 a.u. / lowest freq: 24.55 cm<sup>-1</sup>

|   |           |           |           |
|---|-----------|-----------|-----------|
| C | -0.660544 | -0.726572 | 0.059153  |
| C | -1.860539 | -0.097447 | 0.115996  |
| H | -0.691600 | -1.818492 | -0.004770 |
| C | -1.976243 | 1.390665  | 0.160143  |
| C | -3.120576 | -0.891785 | 0.187355  |
| O | -3.041424 | 1.823605  | -0.507466 |
| O | -1.182749 | 2.134043  | 0.689285  |
| O | -4.147702 | -0.497504 | 0.683440  |
| O | -2.981802 | -2.118850 | -0.320932 |
| C | -4.097604 | -2.989729 | -0.195724 |
| H | -4.332384 | -3.170881 | 0.862818  |
| H | -3.810049 | -3.927003 | -0.683244 |
| H | -4.981752 | -2.562067 | -0.688186 |
| C | -3.254671 | 3.228152  | -0.535442 |
| H | -3.354009 | 3.627502  | 0.483524  |
| H | -4.184056 | 3.384216  | -1.092621 |
| H | -2.420438 | 3.737793  | -1.038016 |
| C | 0.656646  | -0.129211 | 0.062308  |
| H | 0.725624  | 0.955889  | 0.150505  |
| C | 1.759981  | -0.902956 | -0.019704 |
| H | 1.621029  | -1.988149 | -0.089650 |



|   |          |           |           |
|---|----------|-----------|-----------|
| C | 3.156351 | -0.453635 | -0.025165 |
| C | 4.175093 | -1.416830 | -0.109525 |
| C | 3.522207 | 0.902114  | 0.053056  |
| C | 5.517020 | -1.042840 | -0.114390 |
| H | 3.907556 | -2.474776 | -0.172060 |
| C | 4.861836 | 1.275255  | 0.048166  |
| H | 2.754752 | 1.675486  | 0.118691  |
| C | 5.863995 | 0.305241  | -0.035401 |
| H | 6.294080 | -1.807149 | -0.179427 |
| H | 5.127957 | 2.332459  | 0.111300  |
| H | 6.914980 | 0.602284  | -0.038425 |

64

Figure\_S15-2\_9b(NaOPh)-Cu-allenyl / electronic energy: -3146.25183127 a.u. / lowest freq: 14.48 cm-1

|    |           |           |           |
|----|-----------|-----------|-----------|
| Cu | -1.159994 | -0.590393 | 1.249005  |
| C  | -1.116318 | -1.661983 | 2.858319  |
| C  | -1.308620 | 0.472985  | -0.363800 |
| N  | -2.371853 | 0.399588  | -1.177453 |
| N  | -0.493582 | 1.418385  | -0.819509 |
| C  | 0.814281  | 1.723428  | -0.265472 |
| C  | -0.596166 | -2.849269 | 2.995372  |
| C  | -0.025278 | -4.043820 | 3.070053  |
| C  | -0.945998 | 2.002813  | -2.084278 |
| H  | -0.272077 | 1.686950  | -2.894296 |
| C  | -2.351352 | 1.408165  | -2.240987 |
| H  | -3.149298 | 2.149610  | -2.075173 |
| C  | -3.440408 | -0.525568 | -0.997211 |
| C  | -3.475273 | -1.678430 | -1.799498 |
| C  | -4.415212 | -0.266257 | -0.018691 |
| C  | -4.525858 | -2.580829 | -1.607528 |
| C  | -5.446875 | -1.195447 | 0.143691  |
| C  | -5.503845 | -2.341479 | -0.645832 |
| H  | -6.315317 | -3.058967 | -0.505594 |
| H  | 2.120613  | -0.435489 | -1.301376 |
| H  | -2.511030 | 0.949494  | -3.226320 |
| H  | -0.945517 | 3.100865  | -2.029370 |
| H  | 0.971060  | 0.976016  | 0.528978  |
| C  | 0.814478  | 3.104087  | 0.377621  |
| C  | 1.750663  | 4.094003  | 0.065960  |
| C  | -0.169357 | 3.389740  | 1.334883  |
| C  | 1.702016  | 5.341374  | 0.693971  |
| H  | 2.532536  | 3.907255  | -0.671765 |
| C  | -0.220119 | 4.630799  | 1.961712  |
| H  | -0.905210 | 2.621803  | 1.589754  |
| C  | 0.718062  | 5.614499  | 1.640496  |
| H  | 2.440976  | 6.102966  | 0.435574  |
| H  | -0.993041 | 4.832638  | 2.706634  |
| H  | 0.680478  | 6.590470  | 2.129154  |
| C  | 1.902113  | 1.482826  | -1.323653 |
| H  | 2.887379  | 1.589112  | -0.831044 |
| H  | 1.848654  | 2.269951  | -2.096199 |
| O  | 1.751113  | 0.246580  | -1.937746 |
| H  | -1.654416 | -1.288009 | 3.746046  |
| H  | 0.986244  | -4.167031 | 3.474573  |
| H  | -0.566270 | -4.953493 | 2.789462  |
| O  | 2.821164  | -1.346953 | -0.192222 |
| C  | 4.108122  | -1.475818 | -0.364930 |
| C  | 4.777182  | -0.916478 | -1.488893 |
| C  | 4.920292  | -2.188977 | 0.557579  |
| C  | 6.149052  | -1.066440 | -1.667172 |
| H  | 4.175796  | -0.369004 | -2.219089 |
| C  | 6.291874  | -2.333409 | 0.366447  |
| H  | 4.444043  | -2.630613 | 1.438885  |
| C  | 6.926653  | -1.775348 | -0.746475 |
| H  | 6.622021  | -0.621629 | -2.548077 |
| H  | 6.877295  | -2.893512 | 1.101940  |
| H  | 8.002320  | -1.892512 | -0.894117 |
| Na | 1.484647  | -2.445468 | 1.154493  |
| H  | -6.214114 | -1.015553 | 0.900660  |
| H  | -4.568838 | -3.488419 | -2.214687 |
| C  | -4.327742 | 0.958995  | 0.851507  |
| H  | -5.265653 | 1.121622  | 1.398270  |
| H  | -3.517629 | 0.850456  | 1.591941  |
| H  | -4.103510 | 1.862442  | 0.265913  |
| C  | -2.409874 | -1.938363 | -2.830953 |
| H  | -2.615164 | -1.387375 | -3.763086 |
| H  | -1.418478 | -1.620506 | -2.477586 |
| H  | -2.364271 | -3.005637 | -3.085514 |

96

Figure\_S15-2\_PA-9b(NaOPh)-ts(1,6major)\_01 / electronic energy: -3988.21834759 a.u. / lowest freq: -441.84 cm-1

|   |           |           |           |
|---|-----------|-----------|-----------|
| C | 2.922414  | 0.429802  | -1.695778 |
| H | 3.860551  | 0.219443  | -1.172217 |
| C | 2.236525  | -0.867157 | -2.138580 |
| H | 2.104802  | -0.937626 | -3.228128 |
| C | 0.803687  | 0.313433  | -0.707976 |
| C | -0.086863 | -1.763320 | -1.622590 |
| C | 0.049225  | -2.992460 | -0.954587 |
| C | -1.184815 | -1.485804 | -2.456696 |
| C | -0.982581 | -3.928515 | -1.084987 |
| C | -2.190373 | -2.451526 | -2.562200 |

|    |           |           |           |
|----|-----------|-----------|-----------|
| C  | -2.098720 | -3.657111 | -1.870965 |
| H  | -2.895943 | -4.398509 | -1.959475 |
| Cu | -0.823872 | 0.859921  | 0.284910  |
| N  | 1.936156  | 1.015424  | -0.780295 |
| N  | 0.930242  | -0.774923 | -1.474145 |
| C  | -2.204880 | 0.628600  | 1.847805  |
| C  | -0.921242 | 0.176567  | 2.329538  |
| H  | 4.077180  | 0.564705  | 0.992854  |
| H  | 2.790138  | -1.753458 | -1.795804 |
| H  | 3.132125  | 1.111568  | -2.533749 |
| H  | -2.507817 | 1.623409  | 2.184343  |
| C  | -0.546841 | -1.239987 | 2.458831  |
| C  | -0.031665 | 1.156508  | 2.958134  |
| O  | -1.590857 | -2.066677 | 2.386390  |
| O  | 0.580755  | -1.669343 | 2.644655  |
| O  | 1.032929  | 0.932331  | 3.514633  |
| O  | -0.483842 | 2.417118  | 2.845236  |
| C  | 0.324283  | 3.441986  | 3.400822  |
| H  | 0.421573  | 3.320535  | 4.488542  |
| H  | -0.180740 | 4.385652  | 3.169340  |
| H  | 1.329525  | 3.432000  | 2.955675  |
| C  | -1.345345 | -3.453132 | 2.553836  |
| H  | -0.637956 | -3.820614 | 1.800685  |
| H  | -2.314315 | -3.948155 | 2.429703  |
| H  | -0.941082 | -3.657638 | 3.555114  |
| C  | 2.126148  | 2.287406  | -0.107837 |
| H  | 1.467591  | 2.261116  | 0.775679  |
| C  | 1.708036  | 3.483835  | -0.951465 |
| C  | 1.606399  | 4.742155  | -0.343838 |
| C  | 1.369123  | 3.369512  | -2.302922 |
| C  | 1.188186  | 5.855869  | -1.068067 |
| H  | 1.835467  | 4.854126  | 0.719168  |
| C  | 0.953179  | 4.484373  | -3.032581 |
| H  | 1.395613  | 2.396899  | -2.795903 |
| C  | 0.863325  | 5.731873  | -2.419552 |
| H  | 1.106210  | 6.824933  | -0.571308 |
| H  | 0.690386  | 4.369611  | -4.086295 |
| H  | 0.532116  | 6.603217  | -2.988264 |
| C  | 3.561746  | 2.419386  | 0.431664  |
| H  | 3.650166  | 3.413057  | 0.896434  |
| H  | 4.272621  | 2.414195  | -0.417198 |
| O  | 3.875870  | 1.462009  | 1.388460  |
| C  | -3.155308 | -0.100368 | 1.114443  |
| H  | -2.888659 | -1.086867 | 0.731842  |
| C  | -4.415233 | 0.429156  | 0.820228  |
| H  | -4.778472 | 1.214346  | 1.486097  |
| C  | -5.472465 | -0.394296 | 0.191487  |
| C  | -6.822089 | -0.124418 | 0.457978  |
| C  | -5.162555 | -1.443195 | -0.688304 |
| C  | -7.832602 | -0.887518 | -0.125885 |
| H  | -7.082654 | 0.692768  | 1.136063  |
| C  | -6.170352 | -2.204162 | -1.272758 |
| H  | -4.120020 | -1.657003 | -0.931701 |
| C  | -7.511333 | -1.931460 | -0.993155 |
| H  | -8.878393 | -0.665085 | 0.097958  |
| H  | -5.905855 | -3.013860 | -1.957192 |
| H  | -8.302268 | -2.527931 | -1.452967 |
| C  | -1.737108 | 2.375541  | -0.741870 |
| H  | -0.974778 | 3.010437  | -1.195899 |
| C  | -2.998603 | 2.344286  | -0.821026 |
| C  | -4.314415 | 2.014075  | -0.751116 |
| H  | -5.004423 | 2.673653  | -0.218062 |
| H  | -4.747561 | 1.453889  | -1.585663 |
| O  | 4.000986  | -1.037809 | 0.898803  |
| Na | 2.528816  | -0.462660 | 2.461997  |
| C  | 4.800380  | -1.840980 | 0.264080  |
| C  | 5.836089  | -1.361067 | -0.584407 |
| C  | 4.679956  | -3.253978 | 0.369114  |
| C  | 6.660905  | -2.230265 | -1.294378 |
| H  | 5.986997  | -0.279601 | -0.659401 |
| C  | 5.511410  | -4.111757 | -0.343643 |
| H  | 3.909763  | -3.654591 | 1.033348  |
| C  | 6.507407  | -3.615023 | -1.191084 |
| H  | 7.442598  | -1.816898 | -1.938860 |
| H  | 5.380576  | -5.192608 | -0.234208 |
| H  | 7.155322  | -4.292610 | -1.751099 |
| C  | 1.292224  | -3.319854 | -0.175094 |
| H  | 1.100874  | -4.089163 | 0.584691  |
| H  | 2.068210  | -3.721131 | -0.846549 |
| H  | 1.721990  | -2.439705 | 0.321344  |
| C  | -1.272830 | -0.195750 | -3.225584 |
| H  | -1.548916 | 0.639870  | -2.565194 |
| H  | -0.308796 | 0.061131  | -3.688869 |
| H  | -2.030718 | -0.266451 | -4.017047 |
| H  | -3.052668 | -2.254308 | -3.203920 |
| H  | -0.901157 | -4.887259 | -0.566807 |

96

Figure\_S15-2\_PA-9b(NaOPh)-ts(1,6major)\_02 / electronic energy: -3988.21729738 a.u. / lowest freq: -451.32 cm-1

|   |          |          |           |
|---|----------|----------|-----------|
| C | 2.986343 | 0.318627 | -1.694713 |
|---|----------|----------|-----------|

|    |           |           |           |
|----|-----------|-----------|-----------|
| H  | 3.967462  | 0.112327  | -1.251196 |
| C  | 2.269258  | -0.970144 | -2.107823 |
| H  | 2.201159  | -1.093289 | -3.197403 |
| C  | 0.879621  | 0.278834  | -0.699110 |
| C  | -0.139113 | -1.700868 | -1.665153 |
| C  | -0.138001 | -2.881040 | -0.901783 |
| C  | -1.173512 | -1.400139 | -2.568826 |
| C  | -1.251177 | -3.723647 | -0.995237 |
| C  | -2.268961 | -2.267152 | -2.627963 |
| C  | -2.316078 | -3.411335 | -1.835239 |
| H  | -3.180448 | -4.077221 | -1.889283 |
| Cu | -0.792261 | 0.850813  | 0.202659  |
| N  | 2.062901  | 0.895522  | -0.711346 |
| N  | 0.938278  | -0.774967 | -1.522329 |
| C  | -2.271925 | 0.736024  | 1.687884  |
| C  | -1.033963 | 0.234154  | 2.238183  |
| H  | 4.019944  | 0.173928  | 1.162225  |
| H  | 2.753641  | -1.862285 | -1.682024 |
| H  | 3.114662  | 1.008979  | -2.542972 |
| H  | -2.521148 | 1.765368  | 1.957917  |
| C  | -0.752349 | -1.195887 | 2.445957  |
| C  | -0.115506 | 1.179196  | 2.879359  |
| O  | -1.843551 | -1.960153 | 2.381430  |
| O  | 0.338455  | -1.684555 | 2.691367  |
| O  | 0.926585  | 0.909437  | 3.456473  |
| O  | -0.509010 | 2.460406  | 2.760410  |
| C  | 0.319250  | 3.443460  | 3.362920  |
| H  | 0.418117  | 3.266821  | 4.442699  |
| H  | -0.172072 | 4.405375  | 3.181665  |
| H  | 1.322316  | 3.443339  | 2.912047  |
| C  | -1.688746 | -3.347853 | 2.627360  |
| H  | -0.975555 | -3.794781 | 1.924013  |
| H  | -2.679790 | -3.792707 | 2.487897  |
| H  | -1.336349 | -3.523790 | 3.653337  |
| C  | 2.340195  | 2.111678  | 0.046992  |
| H  | 1.629781  | 2.091705  | 0.885540  |
| C  | 2.086558  | 3.385060  | -0.738407 |
| C  | 1.038547  | 4.228747  | -0.354225 |
| C  | 2.888145  | 3.763790  | -1.823410 |
| C  | 0.781713  | 5.413405  | -1.042738 |
| H  | 0.402344  | 3.942889  | 0.487208  |
| C  | 2.631844  | 4.946531  | -2.516423 |
| H  | 3.729793  | 3.140300  | -2.133507 |
| C  | 1.577208  | 5.773788  | -2.129581 |
| H  | -0.045159 | 6.054275  | -0.729316 |
| H  | 3.265160  | 5.226191  | -3.361179 |
| H  | 1.379433  | 6.701010  | -2.671573 |
| C  | 3.741847  | 2.096895  | 0.673908  |
| H  | 3.866009  | 3.064131  | 1.186804  |
| H  | 4.510188  | 2.073956  | -0.124075 |
| O  | 3.925002  | 1.077466  | 1.597391  |
| C  | -3.254391 | 0.024616  | 0.980592  |
| H  | -3.052354 | -1.003008 | 0.676351  |
| C  | -4.459506 | 0.625937  | 0.607799  |
| H  | -4.754110 | 1.507205  | 1.182096  |
| C  | -5.590994 | -0.160816 | 0.063880  |
| C  | -6.903831 | 0.294599  | 0.250257  |
| C  | -5.393711 | -1.351738 | -0.652747 |
| C  | -7.989256 | -0.421351 | -0.252511 |
| H  | -7.075418 | 1.225055  | 0.798307  |
| C  | -6.476995 | -2.067104 | -1.155126 |
| H  | -4.380854 | -1.716965 | -0.834231 |
| C  | -7.780548 | -1.606849 | -0.956421 |
| H  | -9.003864 | -0.049400 | -0.092989 |
| H  | -6.301975 | -2.992321 | -1.709338 |
| H  | -8.629291 | -2.168261 | -1.352817 |
| C  | -1.624544 | 2.252756  | -1.031211 |
| H  | -0.828849 | 2.802010  | -1.535135 |
| C  | -2.882459 | 2.256068  | -1.164392 |
| C  | -4.210162 | 1.970549  | -1.127901 |
| H  | -4.910778 | 2.713122  | -0.736310 |
| H  | -4.608055 | 1.315814  | -1.909739 |
| O  | 3.811127  | -1.368592 | 0.973880  |
| Na | 2.380849  | -0.651584 | 2.557033  |
| C  | 4.668019  | -2.088176 | 0.313374  |
| C  | 5.788522  | -1.507441 | -0.343455 |
| C  | 4.532753  | -3.498191 | 0.194937  |
| C  | 6.676056  | -2.275878 | -1.092146 |
| H  | 5.952183  | -0.430616 | -0.233573 |
| C  | 5.426072  | -4.254914 | -0.557275 |
| H  | 3.703702  | -3.980456 | 0.718331  |
| C  | 6.503650  | -3.656667 | -1.218277 |
| H  | 7.522796  | -1.786486 | -1.582861 |
| H  | 5.279736  | -5.336949 | -0.628568 |
| H  | 7.198921  | -4.255996 | -1.809824 |
| C  | 1.053386  | -3.271676 | -0.073690 |
| H  | 0.773259  | -3.949268 | 0.743021  |
| H  | 1.779373  | -3.809838 | -0.704007 |
| H  | 1.582692  | -2.411477 | 0.357498  |

|   |           |           |           |
|---|-----------|-----------|-----------|
| C | -1.095699 | -0.193546 | -3.463271 |
| H | -1.270310 | 0.731139  | -2.896036 |
| H | -0.105194 | -0.108209 | -3.933914 |
| H | -1.852610 | -0.250354 | -4.256829 |
| H | -3.089777 | -2.042730 | -3.313478 |
| H | -1.274967 | -4.644465 | -0.407224 |

96

Figure\_S15-2\_PA-9b(NaOPh)-ts(1,6major)\_03 / electronic energy: -3988.21368855 a.u. / lowest freq: -436.08 cm-1

|    |           |           |           |
|----|-----------|-----------|-----------|
| C  | 3.075670  | 0.237310  | -1.712348 |
| H  | 4.026605  | -0.139063 | -1.316446 |
| C  | 2.211194  | -0.896817 | -2.272765 |
| H  | 2.160467  | -0.900573 | -3.370075 |
| C  | 0.972236  | 0.334434  | -0.721365 |
| C  | -0.324006 | -1.214358 | -2.052979 |
| C  | -0.744993 | -2.358628 | -1.356623 |
| C  | -1.101000 | -0.631328 | -3.069230 |
| C  | -2.001706 | -2.890227 | -1.661917 |
| C  | -2.349419 | -1.196403 | -3.346234 |
| C  | -2.800449 | -2.310051 | -2.643457 |
| H  | -3.784188 | -2.730777 | -2.863615 |
| Cu | -0.686317 | 0.857529  | 0.230930  |
| N  | 2.227071  | 0.783882  | -0.647224 |
| N  | 0.905087  | -0.588352 | -1.685659 |
| C  | -2.116164 | 0.711739  | 1.749323  |
| C  | -0.860797 | 0.212181  | 2.278893  |
| H  | 4.128288  | -0.087967 | 1.147173  |
| H  | 2.560656  | -1.884881 | -1.929137 |
| H  | 3.284468  | 1.013955  | -2.466663 |
| H  | -2.344480 | 1.751575  | 1.995873  |
| C  | -0.685029 | -1.237066 | 2.475791  |
| C  | 0.057031  | 1.178485  | 2.887938  |
| O  | 0.522102  | -1.617155 | 2.956989  |
| O  | -1.532756 | -2.074647 | 2.251894  |
| O  | 1.110678  | 0.947677  | 3.463406  |
| O  | -0.346142 | 2.453408  | 2.727498  |
| C  | 0.471500  | 3.464594  | 3.297158  |
| H  | 0.567275  | 3.325964  | 4.382692  |
| H  | -0.028459 | 4.414560  | 3.080292  |
| H  | 1.476069  | 3.459941  | 2.849726  |
| C  | 0.659719  | -2.996206 | 3.282242  |
| H  | -0.133464 | -3.315000 | 3.970889  |
| H  | 1.637478  | -3.100380 | 3.765833  |
| H  | 0.624511  | -3.618606 | 2.378914  |
| C  | 2.599570  | 1.956578  | 0.140396  |
| H  | 1.935902  | 1.941629  | 1.016847  |
| C  | 2.334152  | 3.247374  | -0.615826 |
| C  | 1.174784  | 3.977763  | -0.331073 |
| C  | 3.198716  | 3.722416  | -1.610593 |
| C  | 0.875092  | 5.146833  | -1.028260 |
| H  | 0.486594  | 3.613875  | 0.436233  |
| C  | 2.901508  | 4.892378  | -2.309905 |
| H  | 4.120297  | 3.185488  | -1.846304 |
| C  | 1.738518  | 5.606505  | -2.022472 |
| H  | -0.038777 | 5.697217  | -0.794314 |
| H  | 3.586566  | 5.248693  | -3.082246 |
| H  | 1.507375  | 6.522668  | -2.570149 |
| C  | 4.031336  | 1.860983  | 0.678200  |
| H  | 4.240407  | 2.808615  | 1.198972  |
| H  | 4.751398  | 1.804521  | -0.160903 |
| O  | 4.217184  | 0.816614  | 1.576957  |
| C  | -3.148813 | -0.027356 | 1.148240  |
| H  | -2.977501 | -1.078507 | 0.921072  |
| C  | -4.356574 | 0.573293  | 0.793262  |
| H  | -4.579117 | 1.530705  | 1.271274  |
| C  | -5.549380 | -0.215280 | 0.406431  |
| C  | -6.828739 | 0.322630  | 0.606047  |
| C  | -5.445331 | -1.489417 | -0.173579 |
| C  | -7.971185 | -0.390888 | 0.246068  |
| H  | -6.929051 | 1.315276  | 1.053649  |
| C  | -6.585148 | -2.201553 | -0.535431 |
| H  | -4.460385 | -1.922032 | -0.358379 |
| C  | -7.854197 | -1.656614 | -0.327109 |
| H  | -8.958002 | 0.046543  | 0.413749  |
| H  | -6.481698 | -3.190323 | -0.988550 |
| H  | -8.747621 | -2.216415 | -0.612356 |
| C  | -1.614745 | 2.128636  | -1.065154 |
| H  | -0.863226 | 2.689745  | -1.620370 |
| C  | -2.868771 | 2.027191  | -1.200000 |
| C  | -4.176090 | 1.670356  | -1.133655 |
| H  | -4.923643 | 2.404870  | -0.822598 |
| H  | -4.528775 | 0.896046  | -1.822840 |
| O  | 3.632282  | -1.601365 | 1.089559  |
| Na | 2.657990  | -0.582953 | 2.822644  |
| C  | 4.145403  | -2.489011 | 0.293979  |
| C  | 5.310845  | -2.222969 | -0.477422 |
| C  | 3.568762  | -3.778317 | 0.134133  |
| C  | 5.824835  | -3.158507 | -1.371382 |
| H  | 5.807380  | -1.256188 | -0.346008 |
| C  | 4.092098  | -4.705359 | -0.762030 |

|   |           |           |           |
|---|-----------|-----------|-----------|
| H | 2.689520  | -4.023671 | 0.735008  |
| C | 5.219923  | -4.407667 | -1.534005 |
| H | 6.719667  | -2.908265 | -1.949433 |
| H | 3.609481  | -5.682424 | -0.861028 |
| H | 5.623432  | -5.137731 | -2.238844 |
| C | 0.146507  | -3.027036 | -0.349983 |
| H | -0.447495 | -3.614941 | 0.360490  |
| H | 0.849815  | -3.705516 | -0.858451 |
| H | 0.756872  | -2.307495 | 0.213358  |
| C | -0.603807 | 0.545931  | -3.863335 |
| H | 0.062659  | 1.187823  | -3.273800 |
| H | -0.037687 | 0.202046  | -4.744568 |
| H | -1.442001 | 1.157572  | -4.222659 |
| H | -2.978166 | -0.748093 | -4.119362 |
| H | -2.354357 | -3.770588 | -1.119048 |

96

Figure\_S15-2\_PA-9b(Na0Ph)-ts(1,6major)\_04 / electronic energy: -3988.21708629 a.u. / lowest freq: -456.14 cm-1

|    |           |           |           |
|----|-----------|-----------|-----------|
| C  | 2.911653  | 0.439055  | -1.696940 |
| H  | 3.885451  | 0.158815  | -1.271244 |
| C  | 2.153742  | -0.773867 | -2.248380 |
| H  | 2.035833  | -0.741151 | -3.340875 |
| C  | 0.828070  | 0.317727  | -0.657719 |
| C  | -0.286621 | -1.438892 | -1.916442 |
| C  | -0.354408 | -2.775365 | -1.486949 |
| C  | -1.311195 | -0.855246 | -2.686333 |
| C  | -1.511743 | -3.503418 | -1.784752 |
| C  | -2.455763 | -1.614435 | -2.947400 |
| C  | -2.563246 | -2.924496 | -2.488242 |
| H  | -3.464070 | -3.504668 | -2.700646 |
| Cu | -0.774598 | 0.746500  | 0.417106  |
| N  | 2.003745  | 0.946274  | -0.660549 |
| N  | 0.851638  | -0.645615 | -1.586420 |
| C  | -2.248228 | 0.360097  | 1.834807  |
| C  | -1.109356 | -0.465247 | 2.176370  |
| H  | 3.420152  | -0.250343 | 1.342198  |
| H  | 2.638149  | -1.722575 | -1.972364 |
| H  | 3.069862  | 1.206751  | -2.469058 |
| H  | -2.352814 | 1.283299  | 2.412406  |
| C  | -1.081468 | -1.926749 | 2.014812  |
| C  | -0.060806 | 0.112092  | 3.025590  |
| O  | -2.261593 | -2.451246 | 1.680176  |
| O  | -0.111158 | -2.647297 | 2.191124  |
| O  | 0.807859  | -0.493520 | 3.630991  |
| O  | -0.113202 | 1.455706  | 3.070705  |
| C  | 0.916719  | 2.108536  | 3.803512  |
| H  | 0.814005  | 1.909276  | 4.879661  |
| H  | 0.790194  | 3.179339  | 3.609283  |
| H  | 1.900707  | 1.760635  | 3.460045  |
| C  | -2.350177 | -3.862813 | 1.590770  |
| H  | -1.583682 | -4.265646 | 0.917729  |
| H  | -3.348170 | -4.078435 | 1.194162  |
| H  | -2.231395 | -4.321845 | 2.582868  |
| C  | 2.340542  | 2.033779  | 0.252242  |
| H  | 1.490893  | 2.086719  | 0.947571  |
| C  | 2.477193  | 3.385608  | -0.424786 |
| C  | 3.504018  | 3.660040  | -1.338651 |
| C  | 1.595608  | 4.419120  | -0.085689 |
| C  | 3.617513  | 4.919504  | -1.926279 |
| H  | 4.237125  | 2.892327  | -1.594219 |
| C  | 1.708193  | 5.680789  | -0.668948 |
| H  | 0.810062  | 4.233946  | 0.651778  |
| C  | 2.716119  | 5.932094  | -1.598805 |
| H  | 4.419959  | 5.111491  | -2.641875 |
| H  | 1.005134  | 6.469418  | -0.392444 |
| H  | 2.806060  | 6.917576  | -2.060744 |
| C  | 3.580033  | 1.707614  | 1.099165  |
| H  | 3.764404  | 2.581689  | 1.745617  |
| H  | 4.466950  | 1.622495  | 0.438109  |
| O  | 3.415334  | 0.587191  | 1.896937  |
| C  | -3.318465 | 0.032623  | 0.986463  |
| H  | -3.247009 | -0.865017 | 0.371166  |
| C  | -4.441599 | 0.855207  | 0.866263  |
| H  | -4.640634 | 1.528532  | 1.702928  |
| C  | -5.649516 | 0.405282  | 0.134863  |
| C  | -6.912182 | 0.874478  | 0.523212  |
| C  | -5.572880 | -0.476510 | -0.955452 |
| C  | -8.066021 | 0.464418  | -0.143529 |
| H  | -6.989646 | 1.569411  | 1.363818  |
| C  | -6.724457 | -0.886297 | -1.621474 |
| H  | -4.599946 | -0.837132 | -1.297360 |
| C  | -7.977694 | -0.420121 | -1.217755 |
| H  | -9.039931 | 0.839043  | 0.179889  |
| H  | -6.643235 | -1.574612 | -2.466153 |
| H  | -8.880213 | -0.742692 | -1.741363 |
| C  | -1.418753 | 2.525700  | -0.359989 |
| H  | -0.564222 | 3.061826  | -0.772346 |
| C  | -2.663823 | 2.746159  | -0.394733 |
| C  | -4.018144 | 2.646333  | -0.344313 |
| H  | -4.532507 | 2.328679  | -1.256498 |

|    |           |           |           |
|----|-----------|-----------|-----------|
| H  | -4.584231 | 3.325705  | 0.299112  |
| Na | 2.080077  | -2.048281 | 2.497610  |
| O  | 3.374344  | -1.710946 | 0.728569  |
| C  | 4.458389  | -2.073226 | 0.103991  |
| C  | 5.642126  | -1.284474 | 0.136821  |
| C  | 4.518745  | -3.266827 | -0.664462 |
| C  | 6.784347  | -1.654162 | -0.567875 |
| H  | 5.637390  | -0.376757 | 0.746692  |
| C  | 5.668446  | -3.625476 | -1.363142 |
| H  | 3.633426  | -3.906239 | -0.694345 |
| C  | 6.813788  | -2.824778 | -1.330775 |
| H  | 7.671839  | -1.016130 | -0.516563 |
| H  | 5.670708  | -4.552392 | -1.944710 |
| H  | 7.712231  | -3.110498 | -1.881951 |
| H  | -3.264864 | -1.173356 | -3.534991 |
| H  | -1.584467 | -4.544144 | -1.459689 |
| C  | 0.798724  | -3.431127 | -0.780327 |
| H  | 1.430315  | -2.712250 | -0.240155 |
| H  | 0.449158  | -4.189645 | -0.067553 |
| H  | 1.440707  | -3.942941 | -1.516334 |
| C  | -1.184832 | 0.540082  | -3.234897 |
| H  | -1.838161 | 0.671642  | -4.107905 |
| H  | -1.473448 | 1.287115  | -2.481023 |
| H  | -0.151485 | 0.764726  | -3.534712 |

96

Figure\_S15-2\_PA-9b(NaOPh)-ts(1,6major)\_05 / electronic energy: -3988.21870349 a.u. / lowest freq: -445.32 cm-1

|    |           |           |           |
|----|-----------|-----------|-----------|
| C  | 2.857606  | 0.592709  | -1.657269 |
| H  | 3.810642  | 0.227948  | -1.249852 |
| C  | 2.064957  | -0.524779 | -2.346424 |
| H  | 1.892918  | -0.335298 | -3.416182 |
| C  | 0.784756  | 0.368607  | -0.598812 |
| C  | -0.345287 | -1.262930 | -2.014535 |
| C  | -0.361046 | -2.652570 | -1.809214 |
| C  | -1.413768 | -0.595041 | -2.645824 |
| C  | -1.498583 | -3.364267 | -2.208437 |
| C  | -2.533867 | -1.343847 | -3.016737 |
| C  | -2.582419 | -2.717703 | -2.791748 |
| H  | -3.464648 | -3.288522 | -3.089900 |
| Cu | -0.747078 | 0.692040  | 0.612170  |
| N  | 1.952753  | 1.007847  | -0.581720 |
| N  | 0.792390  | -0.503400 | -1.614060 |
| C  | -2.204273 | 0.099012  | 1.965043  |
| C  | -1.076638 | -0.785336 | 2.165243  |
| H  | 3.255348  | -0.321148 | 1.301105  |
| H  | 2.560233  | -1.500330 | -2.234882 |
| H  | 3.067495  | 1.442674  | -2.325207 |
| H  | -2.306164 | 0.907980  | 2.693884  |
| C  | -1.072316 | -2.201629 | 1.774568  |
| C  | -0.019614 | -0.358663 | 3.091418  |
| O  | -2.259583 | -2.646820 | 1.356992  |
| O  | -0.116735 | -2.959966 | 1.840400  |
| O  | 0.851992  | -1.058060 | 3.581573  |
| O  | -0.075233 | 0.955512  | 3.363114  |
| C  | 0.962058  | 1.482974  | 4.181405  |
| H  | 0.924289  | 1.044478  | 5.188580  |
| H  | 0.780124  | 2.561863  | 4.236965  |
| H  | 1.938451  | 1.272627  | 3.723783  |
| C  | -2.375699 | -4.030685 | 1.074989  |
| H  | -1.604075 | -4.357752 | 0.367946  |
| H  | -3.369456 | -4.168720 | 0.635276  |
| H  | -2.287813 | -4.619853 | 1.999401  |
| C  | 2.296746  | 2.061691  | 0.353150  |
| H  | 1.431902  | 2.137522  | 1.032506  |
| C  | 2.463739  | 3.397518  | -0.364716 |
| C  | 3.386496  | 4.361527  | 0.057091  |
| C  | 1.649261  | 3.698679  | -1.465926 |
| C  | 3.484594  | 5.591583  | -0.594641 |
| H  | 4.045004  | 4.167040  | 0.904317  |
| C  | 1.743904  | 4.926394  | -2.117203 |
| H  | 0.930281  | 2.956712  | -1.821908 |
| C  | 2.663819  | 5.880621  | -1.682432 |
| H  | 4.213068  | 6.327466  | -0.247298 |
| H  | 1.095271  | 5.136965  | -2.970327 |
| H  | 2.742631  | 6.843355  | -2.191747 |
| C  | 3.486279  | 1.646551  | 1.230795  |
| H  | 3.656964  | 2.438304  | 1.976299  |
| H  | 4.404319  | 1.590596  | 0.610661  |
| O  | 3.240386  | 0.467052  | 1.918904  |
| C  | -3.261428 | -0.064078 | 1.053689  |
| H  | -3.183884 | -0.840518 | 0.291453  |
| C  | -4.379843 | 0.773108  | 1.064718  |
| H  | -4.583088 | 1.292472  | 2.003702  |
| C  | -5.580660 | 0.471567  | 0.251432  |
| C  | -6.844980 | 0.877588  | 0.700514  |
| C  | -5.494885 | -0.206330 | -0.975020 |
| C  | -7.991820 | 0.602596  | -0.043331 |
| H  | -6.930404 | 1.411309  | 1.650922  |
| C  | -6.638880 | -0.479579 | -1.719117 |
| H  | -4.519913 | -0.514577 | -1.358570 |

|    |           |           |           |
|----|-----------|-----------|-----------|
| C  | -7.894132 | -0.078058 | -1.256411 |
| H  | -8.967732 | 0.922730  | 0.328835  |
| H  | -6.549318 | -1.007035 | -2.671800 |
| H  | -8.791564 | -0.293262 | -1.840485 |
| C  | -1.342665 | 2.632887  | 0.290566  |
| H  | -0.472588 | 3.261794  | 0.098343  |
| C  | -2.584966 | 2.862434  | 0.228316  |
| C  | -3.939296 | 2.760171  | 0.189715  |
| H  | -4.539174 | 3.286907  | 0.936805  |
| H  | -4.413991 | 2.634785  | -0.788734 |
| O  | 3.297676  | -1.739048 | 0.531693  |
| Na | 2.079434  | -2.463842 | 2.228412  |
| C  | 4.438206  | -1.969298 | -0.054934 |
| C  | 5.609854  | -1.228330 | 0.266472  |
| C  | 4.577851  | -2.959185 | -1.064867 |
| C  | 6.816513  | -1.450875 | -0.390549 |
| H  | 5.540220  | -0.476889 | 1.057518  |
| C  | 5.791626  | -3.171777 | -1.713504 |
| H  | 3.701835  | -3.558659 | -1.324154 |
| C  | 6.925425  | -2.420860 | -1.391002 |
| H  | 7.692164  | -0.856438 | -0.112365 |
| H  | 5.853347  | -3.942282 | -2.487934 |
| H  | 7.874427  | -2.591255 | -1.903722 |
| C  | 0.817412  | -3.375766 | -1.218378 |
| H  | 0.489231  | -4.224859 | -0.603666 |
| H  | 1.450493  | -3.780776 | -2.025489 |
| H  | 1.448531  | -2.721835 | -0.600456 |
| C  | -1.355479 | 0.881085  | -2.934760 |
| H  | -1.527498 | 1.473385  | -2.023261 |
| H  | -0.371528 | 1.173257  | -3.331044 |
| H  | -2.120810 | 1.162503  | -3.670071 |
| H  | -3.371101 | -0.842140 | -3.508500 |
| H  | -1.528322 | -4.446216 | -2.057162 |

96

Figure\_S15-2\_PA-9b(Na0Ph)-ts(1,6major)\_06 / electronic energy: -3988.21476261 a.u. / lowest freq: -437.71 cm-1

|    |           |           |           |
|----|-----------|-----------|-----------|
| C  | 2.950144  | 0.143167  | -1.752991 |
| H  | 3.936623  | -0.098917 | -1.338843 |
| C  | 2.169783  | -1.118553 | -2.139877 |
| H  | 2.058139  | -1.235906 | -3.226388 |
| C  | 0.880813  | 0.179502  | -0.683163 |
| C  | -0.245213 | -1.760592 | -1.603420 |
| C  | -0.387304 | -2.793846 | -0.664793 |
| C  | -1.181304 | -1.554527 | -2.633772 |
| C  | -1.529040 | -3.601260 | -0.741437 |
| C  | -2.305640 | -2.381955 | -2.675075 |
| C  | -2.483206 | -3.392711 | -1.730872 |
| H  | -3.370494 | -4.028489 | -1.775280 |
| Cu | -0.763125 | 0.858742  | 0.177576  |
| N  | 2.080115  | 0.760418  | -0.745021 |
| N  | 0.871673  | -0.877266 | -1.501331 |
| C  | -2.280410 | 1.030357  | 1.604552  |
| C  | -1.073987 | 0.598098  | 2.277020  |
| H  | 3.988308  | -0.004353 | 1.136119  |
| H  | 2.632665  | -2.033665 | -1.736404 |
| H  | 3.079255  | 0.824236  | -2.608252 |
| H  | -2.490964 | 2.099719  | 1.700017  |
| C  | -0.869630 | -0.762868 | 2.782287  |
| C  | -0.199172 | 1.704012  | 2.706103  |
| O  | -1.970466 | -1.514748 | 2.723605  |
| O  | 0.167153  | -1.223289 | 3.242627  |
| O  | -0.468026 | 2.881780  | 2.558555  |
| O  | 0.982531  | 1.335842  | 3.243204  |
| C  | 1.816014  | 2.389995  | 3.713040  |
| H  | 2.059225  | 3.091393  | 2.903252  |
| H  | 2.730024  | 1.912500  | 4.079965  |
| H  | 1.319757  | 2.940851  | 4.523495  |
| C  | -1.905660 | -2.832100 | 3.247003  |
| H  | -1.173112 | -3.443047 | 2.702383  |
| H  | -2.907826 | -3.254950 | 3.118998  |
| H  | -1.636154 | -2.816102 | 4.311999  |
| C  | 2.408854  | 1.982781  | -0.017440 |
| H  | 1.701091  | 2.006446  | 0.821276  |
| C  | 2.183838  | 3.249139  | -0.820547 |
| C  | 1.170796  | 4.129389  | -0.421670 |
| C  | 2.966918  | 3.580958  | -1.933606 |
| C  | 0.929137  | 5.305250  | -1.130468 |
| H  | 0.559596  | 3.884028  | 0.452270  |
| C  | 2.723356  | 4.755164  | -2.645725 |
| H  | 3.782093  | 2.926513  | -2.250736 |
| C  | 1.702091  | 5.618550  | -2.248008 |
| H  | 0.131606  | 5.977834  | -0.807746 |
| H  | 3.339394  | 4.999426  | -3.513993 |
| H  | 1.513603  | 6.538593  | -2.805493 |
| C  | 3.806970  | 1.919028  | 0.610968  |
| H  | 3.979226  | 2.889325  | 1.103911  |
| H  | 4.577155  | 1.836809  | -0.181107 |
| O  | 3.929741  | 0.909597  | 1.559388  |
| C  | -3.264358 | 0.245073  | 0.981619  |
| H  | -3.088459 | -0.823099 | 0.847981  |

|    |           |           |           |
|----|-----------|-----------|-----------|
| C  | -4.434143 | 0.813502  | 0.473644  |
| H  | -4.718675 | 1.781841  | 0.890949  |
| C  | -5.566406 | -0.015836 | 0.002372  |
| C  | -6.877243 | 0.464723  | 0.128042  |
| C  | -5.370097 | -1.274372 | -0.588127 |
| C  | -7.963070 | -0.293343 | -0.308342 |
| H  | -7.046829 | 1.445959  | 0.579474  |
| C  | -6.453509 | -2.030625 | -1.025683 |
| H  | -4.357040 | -1.658472 | -0.726758 |
| C  | -7.755963 | -1.545162 | -0.886405 |
| H  | -8.976526 | 0.098507  | -0.195703 |
| H  | -6.280107 | -3.006078 | -1.486463 |
| H  | -8.604748 | -2.139374 | -1.231814 |
| C  | -1.487592 | 2.112708  | -1.264643 |
| H  | -0.651219 | 2.586574  | -1.779220 |
| C  | -2.736441 | 2.117131  | -1.465458 |
| C  | -4.072571 | 1.879121  | -1.452352 |
| H  | -4.761335 | 2.686248  | -1.188925 |
| H  | -4.465898 | 1.130121  | -2.146879 |
| O  | 3.690861  | -1.521901 | 0.918662  |
| Na | 2.227096  | -0.680470 | 2.441171  |
| C  | 4.527280  | -2.249837 | 0.237690  |
| C  | 5.714703  | -1.700421 | -0.320248 |
| C  | 4.294304  | -3.629282 | -0.012049 |
| C  | 6.585617  | -2.470381 | -1.086385 |
| H  | 5.939500  | -0.647360 | -0.122864 |
| C  | 5.173546  | -4.387853 | -0.779553 |
| H  | 3.401796  | -4.089584 | 0.418126  |
| C  | 6.326293  | -3.821267 | -1.331601 |
| H  | 7.486424  | -2.006034 | -1.498577 |
| H  | 4.955425  | -5.446400 | -0.949800 |
| H  | 7.010125  | -4.421950 | -1.934918 |
| C  | 0.642899  | -3.038084 | 0.402330  |
| H  | 0.312051  | -2.632297 | 1.368269  |
| H  | 0.801718  | -4.116670 | 0.544664  |
| H  | 1.610592  | -2.568890 | 0.185897  |
| C  | -0.967745 | -0.478469 | -3.662704 |
| H  | -0.840750 | 0.502986  | -3.186072 |
| H  | -0.065188 | -0.676631 | -4.261746 |
| H  | -1.821940 | -0.418430 | -4.349903 |
| H  | -3.053262 | -2.229680 | -3.457264 |
| H  | -1.661083 | -4.407999 | -0.015899 |

96

Figure\_S15-2\_PA-9b(NaOPh)-ts(1,6major)\_07 / electronic energy: -3988.20625665 a.u. / lowest freq: -462.49 cm<sup>-1</sup>

|    |           |           |           |
|----|-----------|-----------|-----------|
| C  | 2.960599  | 1.158813  | -1.339132 |
| H  | 3.910886  | 1.304323  | -0.810933 |
| C  | 2.830141  | -0.260563 | -1.894371 |
| H  | 2.905030  | -0.301173 | -2.989799 |
| C  | 0.956061  | 0.232439  | -0.582079 |
| C  | 0.948267  | -1.931828 | -1.723154 |
| C  | 1.225245  | -2.979377 | -0.829924 |
| C  | 0.205986  | -2.129166 | -2.898186 |
| C  | 0.755023  | -4.256470 | -1.147910 |
| C  | -0.261134 | -3.418484 | -3.170793 |
| C  | 0.016842  | -4.474717 | -2.307244 |
| H  | -0.346783 | -5.477989 | -2.539729 |
| Cu | -0.944258 | 0.240447  | 0.001250  |
| N  | 1.813467  | 1.247344  | -0.429429 |
| N  | 1.483396  | -0.638537 | -1.447369 |
| C  | -2.562497 | 0.056757  | 1.366116  |
| C  | -1.425734 | -0.689899 | 1.853441  |
| H  | 3.833002  | 1.113078  | 1.548563  |
| H  | 3.581853  | -0.946356 | -1.472078 |
| H  | 2.873128  | 1.918204  | -2.131797 |
| H  | -2.608883 | 1.091080  | 1.720889  |
| C  | -1.397556 | -2.153914 | 1.658162  |
| C  | -0.471436 | -0.038056 | 2.748104  |
| O  | -0.721458 | -2.822227 | 2.599185  |
| O  | -1.964447 | -2.735312 | 0.753791  |
| O  | 0.556375  | -0.526599 | 3.198084  |
| O  | -0.785339 | 1.239669  | 3.024394  |
| C  | 0.112438  | 1.962765  | 3.855268  |
| H  | 0.151859  | 1.520487  | 4.860625  |
| H  | -0.284197 | 2.982206  | 3.910455  |
| H  | 1.126386  | 1.972552  | 3.430127  |
| C  | -0.669988 | -4.232161 | 2.460299  |
| H  | -1.669276 | -4.675902 | 2.576972  |
| H  | -0.005819 | -4.592814 | 3.253485  |
| H  | -0.274043 | -4.514930 | 1.475675  |
| C  | 1.549877  | 2.393744  | 0.432326  |
| H  | 0.799347  | 2.035665  | 1.149985  |
| C  | 0.947707  | 3.584799  | -0.289914 |
| C  | 1.668705  | 4.330999  | -1.231354 |
| C  | -0.363840 | 3.969243  | 0.008398  |
| C  | 1.080466  | 5.420063  | -1.874195 |
| H  | 2.704442  | 4.074908  | -1.465927 |
| C  | -0.952967 | 5.059333  | -0.628951 |
| H  | -0.936723 | 3.392569  | 0.739051  |
| C  | -0.232750 | 5.785128  | -1.576791 |



|    |           |           |           |
|----|-----------|-----------|-----------|
| H  | 1.654808  | 5.990070  | -2.607709 |
| H  | -1.982027 | 5.336170  | -0.389994 |
| H  | -0.692308 | 6.638160  | -2.080722 |
| C  | 2.789875  | 2.788947  | 1.247440  |
| H  | 2.494414  | 3.639434  | 1.883006  |
| H  | 3.580331  | 3.168975  | 0.572789  |
| O  | 3.262544  | 1.762612  | 2.059791  |
| C  | -3.715214 | -0.415403 | 0.722546  |
| H  | -3.757029 | -1.460535 | 0.417409  |
| C  | -4.744414 | 0.460660  | 0.373884  |
| H  | -4.733721 | 1.433428  | 0.874203  |
| C  | -6.101154 | -0.015756 | 0.008785  |
| C  | -7.211521 | 0.794083  | 0.285972  |
| C  | -6.319871 | -1.254403 | -0.614738 |
| C  | -8.502977 | 0.377001  | -0.033968 |
| H  | -7.059374 | 1.764849  | 0.765660  |
| C  | -7.608761 | -1.671204 | -0.936166 |
| H  | -5.471689 | -1.896270 | -0.862988 |
| C  | -8.707292 | -0.859163 | -0.645317 |
| H  | -9.353587 | 1.022157  | 0.197625  |
| H  | -7.757697 | -2.638627 | -1.421175 |
| H  | -9.717592 | -1.188830 | -0.897297 |
| C  | -1.689465 | 1.407506  | -1.499463 |
| H  | -0.877891 | 1.817196  | -2.100974 |
| C  | -2.946077 | 1.509635  | -1.618842 |
| C  | -4.300177 | 1.430200  | -1.522692 |
| H  | -4.818224 | 0.734665  | -2.190043 |
| H  | -4.861136 | 2.333986  | -1.266144 |
| Na | 2.707294  | -0.571273 | 2.597720  |
| O  | 4.369564  | -0.330366 | 1.147279  |
| C  | 5.410955  | -0.586552 | 0.410849  |
| C  | 6.289191  | 0.439613  | -0.030394 |
| C  | 5.712700  | -1.905845 | -0.022372 |
| C  | 7.377097  | 0.162870  | -0.854475 |
| H  | 6.097431  | 1.464020  | 0.304228  |
| C  | 6.802932  | -2.169010 | -0.846662 |
| H  | 5.062308  | -2.720152 | 0.308092  |
| C  | 7.647131  | -1.141266 | -1.277319 |
| H  | 8.028944  | 0.982431  | -1.171402 |
| H  | 6.997727  | -3.199097 | -1.159595 |
| H  | 8.500480  | -1.353735 | -1.924744 |
| H  | -0.844133 | -3.594118 | -4.078051 |
| H  | 0.973223  | -5.090235 | -0.475873 |
| C  | 1.960175  | -2.721265 | 0.456879  |
| H  | 2.792283  | -2.012912 | 0.333959  |
| H  | 1.267645  | -2.291205 | 1.199385  |
| H  | 2.358089  | -3.654521 | 0.878521  |
| C  | -0.107416 | -0.978884 | -3.815774 |
| H  | -0.546481 | -1.336994 | -4.756273 |
| H  | -0.828085 | -0.294777 | -3.341758 |
| H  | 0.789337  | -0.389563 | -4.057214 |

96

Figure\_S15-2\_PA-9b(NaOPh)-ts(1,6minor)\_01 / electronic energy: -3988.21330777 a.u. / lowest freq: -465.41 cm<sup>-1</sup>

|    |           |           |           |
|----|-----------|-----------|-----------|
| C  | -2.703452 | 1.527561  | 1.353933  |
| H  | -3.342978 | 1.905825  | 0.548817  |
| C  | -3.155336 | 0.143503  | 1.821047  |
| H  | -3.272644 | 0.071523  | 2.913922  |
| C  | -1.014417 | -0.030756 | 0.881243  |
| C  | -2.102740 | -2.123289 | 1.644653  |
| C  | -2.975158 | -2.920971 | 0.883049  |
| C  | -1.370947 | -2.661514 | 2.721948  |
| C  | -3.092329 | -4.276835 | 1.209117  |
| C  | -1.500112 | -4.026170 | 2.996819  |
| C  | -2.357832 | -4.829913 | 2.251286  |
| H  | -2.457981 | -5.891270 | 2.488351  |
| Cu | 0.859807  | -0.558380 | 0.410665  |
| N  | -1.350496 | 1.261217  | 0.853276  |
| N  | -2.047049 | -0.720818 | 1.386494  |
| C  | 2.331979  | -1.418163 | -0.920109 |
| C  | 1.048918  | -1.306588 | -1.572761 |
| H  | -2.438726 | 1.975637  | -1.581425 |
| H  | -4.101670 | -0.162762 | 1.352981  |
| H  | -2.688138 | 2.269838  | 2.164430  |
| H  | 2.461082  | -2.357793 | -0.374127 |
| C  | 0.147202  | -2.468699 | -1.550408 |
| C  | 0.692124  | -0.195381 | -2.465502 |
| O  | 0.702653  | -3.542964 | -0.980137 |
| O  | -1.000453 | -2.506542 | -1.968308 |
| O  | -0.228000 | -0.181820 | -3.267190 |
| O  | 1.481597  | 0.873607  | -2.320431 |
| C  | 1.192088  | 2.009920  | -3.130770 |
| H  | 1.301819  | 1.762723  | -4.195843 |
| H  | 1.929614  | 2.768787  | -2.846745 |
| H  | 0.170278  | 2.362424  | -2.931149 |
| C  | -0.107745 | -4.698383 | -0.833584 |
| H  | -1.000735 | -4.474812 | -0.236347 |
| H  | 0.513163  | -5.438721 | -0.317822 |
| H  | -0.416811 | -5.085609 | -1.814710 |
| C  | -0.482404 | 2.304778  | 0.336006  |

|    |           |           |           |
|----|-----------|-----------|-----------|
| H  | 0.254405  | 1.798385  | -0.307085 |
| C  | 0.293606  | 3.040450  | 1.418193  |
| C  | 1.348131  | 3.878162  | 1.033349  |
| C  | 0.033677  | 2.884306  | 2.781895  |
| C  | 2.112520  | 4.551342  | 1.982683  |
| H  | 1.588681  | 3.991999  | -0.027258 |
| C  | 0.796379  | 3.558260  | 3.737016  |
| H  | -0.752112 | 2.204916  | 3.116019  |
| C  | 1.836308  | 4.396519  | 3.341790  |
| H  | 2.934312  | 5.194253  | 1.659717  |
| H  | 0.579539  | 3.416732  | 4.798059  |
| H  | 2.436228  | 4.920867  | 4.088588  |
| C  | -1.263157 | 3.260334  | -0.584936 |
| H  | -0.578174 | 4.072129  | -0.874175 |
| H  | -2.076458 | 3.740584  | -0.003726 |
| O  | -1.722358 | 2.655935  | -1.746480 |
| C  | 3.502782  | -0.663839 | -1.072041 |
| H  | 3.490791  | 0.224788  | -1.700418 |
| C  | 4.646293  | -0.980088 | -0.337409 |
| H  | 4.657466  | -1.966834 | 0.134946  |
| C  | 5.990060  | -0.461868 | -0.692620 |
| C  | 7.125634  | -1.216212 | -0.365546 |
| C  | 6.173511  | 0.771167  | -1.338108 |
| C  | 8.405143  | -0.761858 | -0.682127 |
| H  | 7.001564  | -2.176422 | 0.142453  |
| C  | 7.450542  | 1.226768  | -1.653352 |
| H  | 5.308632  | 1.390169  | -1.586721 |
| C  | 8.573059  | 0.462274  | -1.327830 |
| H  | 9.275623  | -1.367996 | -0.420911 |
| H  | 7.572271  | 2.189941  | -2.154033 |
| H  | 9.574174  | 0.822709  | -1.574003 |
| C  | 1.952881  | 0.073812  | 2.000379  |
| H  | 1.299089  | 0.480418  | 2.772223  |
| C  | 3.218731  | 0.050390  | 1.946370  |
| C  | 4.535742  | -0.023082 | 1.621950  |
| H  | 5.032841  | 0.906130  | 1.328877  |
| H  | 5.171147  | -0.754209 | 2.131239  |
| O  | -3.569546 | 0.815804  | -1.575626 |
| Na | -2.323226 | -0.706554 | -2.549778 |
| C  | -4.803419 | 1.207097  | -1.425874 |
| C  | -5.131349 | 2.570645  | -1.189136 |
| C  | -5.893282 | 0.296363  | -1.470665 |
| C  | -6.446899 | 2.980098  | -0.989008 |
| H  | -4.318714 | 3.302700  | -1.187844 |
| C  | -7.204161 | 0.719154  | -1.269195 |
| H  | -5.682421 | -0.757126 | -1.671689 |
| C  | -7.500188 | 2.062491  | -1.019664 |
| H  | -6.652998 | 4.039557  | -0.809779 |
| H  | -8.012740 | -0.016900 | -1.308984 |
| H  | -8.530570 | 2.387595  | -0.860949 |
| C  | -3.783597 | -2.374056 | -0.261061 |
| H  | -3.538461 | -2.920323 | -1.184349 |
| H  | -4.859107 | -2.512488 | -0.073296 |
| H  | -3.611323 | -1.304644 | -0.435043 |
| C  | -0.473954 | -1.808441 | 3.575976  |
| H  | 0.522893  | -1.709706 | 3.121311  |
| H  | -0.871488 | -0.791004 | 3.700403  |
| H  | -0.345925 | -2.256461 | 4.570381  |
| H  | -0.935187 | -4.456049 | 3.827526  |
| H  | -3.766485 | -4.905046 | 0.621477  |

96

Figure\_S15-2\_PA-9b(NaOPh)-ts(1,6minor)\_02 / electronic energy: -3988.21880720 a.u. / lowest freq: -417.00 cm<sup>-1</sup>

|    |           |           |           |
|----|-----------|-----------|-----------|
| C  | 1.761905  | -1.791282 | 1.776076  |
| H  | 2.352441  | -2.592969 | 1.312869  |
| C  | 2.635032  | -0.586340 | 2.140199  |
| H  | 2.735898  | -0.438022 | 3.224153  |
| C  | 0.892449  | 0.114582  | 0.745694  |
| C  | 2.206003  | 1.889925  | 1.783489  |
| C  | 3.017393  | 2.607055  | 0.892413  |
| C  | 1.671614  | 2.481089  | 2.945623  |
| C  | 3.258748  | 3.960129  | 1.166275  |
| C  | 1.937896  | 3.831168  | 3.181852  |
| C  | 2.721138  | 4.568538  | 2.294576  |
| H  | 2.916206  | 5.625246  | 2.489832  |
| Cu | -0.468886 | 1.217321  | -0.177184 |
| N  | 0.810460  | -1.213644 | 0.824160  |
| N  | 1.899198  | 0.523326  | 1.524319  |
| C  | -1.822999 | 1.533024  | -1.731317 |
| C  | -0.569736 | 1.148249  | -2.351838 |
| H  | 1.955579  | -2.306060 | -1.229788 |
| H  | 3.642677  | -0.659118 | 1.701259  |
| H  | 1.219202  | -2.206824 | 2.641436  |
| H  | -2.047615 | 2.602227  | -1.744604 |
| C  | 0.450227  | 2.186598  | -2.553060 |
| C  | -0.347493 | -0.136575 | -3.028769 |
| O  | 0.036031  | 3.401846  | -2.163131 |
| O  | 1.589596  | 2.022774  | -2.967595 |
| O  | 0.647469  | -0.443922 | -3.666474 |
| O  | -1.375927 | -0.982807 | -2.933039 |

|    |           |           |           |
|----|-----------|-----------|-----------|
| C  | -1.237337 | -2.240028 | -3.586645 |
| H  | -1.189894 | -2.103724 | -4.676284 |
| H  | -2.133752 | -2.811938 | -3.321808 |
| H  | -0.327991 | -2.744800 | -3.235409 |
| C  | 0.990699  | 4.450743  | -2.157730 |
| H  | 1.757031  | 4.271473  | -1.388872 |
| H  | 0.436611  | 5.363558  | -1.914323 |
| H  | 1.475628  | 4.551777  | -3.137759 |
| C  | -0.253813 | -1.998110 | 0.222809  |
| H  | -0.678555 | -1.355490 | -0.563075 |
| C  | -1.368369 | -2.292388 | 1.226963  |
| C  | -1.994074 | -3.539574 | 1.326520  |
| C  | -1.829256 | -1.253921 | 2.049408  |
| C  | -3.050618 | -3.739929 | 2.218893  |
| H  | -1.668763 | -4.377769 | 0.708991  |
| C  | -2.879151 | -1.451499 | 2.940965  |
| H  | -1.376691 | -0.263371 | 1.975903  |
| C  | -3.497165 | -2.699374 | 3.029305  |
| H  | -3.523755 | -4.722489 | 2.279242  |
| H  | -3.220575 | -0.621999 | 3.564278  |
| H  | -4.323739 | -2.857825 | 3.725056  |
| C  | 0.320669  | -3.217779 | -0.502052 |
| H  | -0.517609 | -3.771359 | -0.952477 |
| H  | 0.788139  | -3.903700 | 0.235054  |
| O  | 1.186240  | -2.871986 | -1.530066 |
| C  | -2.839397 | 0.684273  | -1.254705 |
| H  | -2.659053 | -0.389137 | -1.216437 |
| C  | -4.062226 | 1.168496  | -0.789024 |
| H  | -4.357403 | 2.162663  | -1.131121 |
| C  | -5.183262 | 0.260755  | -0.456578 |
| C  | -6.503158 | 0.708524  | -0.612013 |
| C  | -4.972860 | -1.040699 | 0.028207  |
| C  | -7.582123 | -0.119692 | -0.307154 |
| H  | -6.684531 | 1.721243  | -0.982132 |
| C  | -6.050263 | -1.865916 | 0.337097  |
| H  | -3.958015 | -1.409061 | 0.194187  |
| C  | -7.360034 | -1.411481 | 0.168986  |
| H  | -8.601853 | 0.248295  | -0.441340 |
| H  | -5.861528 | -2.870151 | 0.723444  |
| H  | -8.203291 | -2.060945 | 0.414047  |
| C  | -1.309473 | 2.457953  | 1.208127  |
| H  | -0.509410 | 2.962847  | 1.750992  |
| C  | -2.563981 | 2.397696  | 1.356395  |
| C  | -3.884772 | 2.104229  | 1.262011  |
| H  | -4.594768 | 2.886824  | 0.983181  |
| H  | -4.286067 | 1.298529  | 1.885111  |
| Na | 2.694022  | -0.062505 | -2.748602 |
| O  | 3.299535  | -1.392028 | -1.082354 |
| C  | 4.310180  | -2.019851 | -0.554632 |
| C  | 4.267463  | -3.417591 | -0.287140 |
| C  | 5.509863  | -1.347612 | -0.192493 |
| C  | 5.335241  | -4.078242 | 0.313386  |
| H  | 3.367910  | -3.966187 | -0.580603 |
| C  | 6.570754  | -2.022055 | 0.406260  |
| H  | 5.584215  | -0.275502 | -0.391853 |
| C  | 6.499364  | -3.392555 | 0.671859  |
| H  | 5.257280  | -5.153375 | 0.501360  |
| H  | 7.474505  | -1.464877 | 0.671449  |
| H  | 7.334853  | -3.914726 | 1.142964  |
| H  | 1.519159  | 4.311401  | 4.069422  |
| H  | 3.886166  | 4.537323  | 0.482075  |
| C  | 3.616791  | 1.963700  | -0.327367 |
| H  | 3.517050  | 0.869756  | -0.310204 |
| H  | 3.121823  | 2.330658  | -1.239821 |
| H  | 4.683989  | 2.217853  | -0.409733 |
| C  | 0.824285  | 1.681967  | 3.899951  |
| H  | 0.260260  | 2.342870  | 4.571150  |
| H  | 0.108422  | 1.043659  | 3.363047  |
| H  | 1.445185  | 1.022478  | 4.527103  |

96

Figure\_S15-2\_PA-9b(NaOPh)-ts(1,6minor)\_03 / electronic energy: -3988.21880751 a.u. / lowest freq: -416.95 cm-1

|    |           |           |           |
|----|-----------|-----------|-----------|
| C  | -1.762011 | -1.790553 | -1.777467 |
| H  | -2.352725 | -2.591915 | -1.313889 |
| C  | -2.634895 | -0.585471 | -2.141797 |
| H  | -2.734931 | -0.436781 | -3.225783 |
| C  | -0.892797 | 0.115193  | -0.746512 |
| C  | -2.206558 | 1.890622  | -1.783994 |
| C  | -3.018371 | 2.607449  | -0.893056 |
| C  | -1.672004 | 2.481984  | -2.945959 |
| C  | -3.260117 | 3.960443  | -1.167000 |
| C  | -1.938691 | 3.831966  | -3.182253 |
| C  | -2.722459 | 4.569031  | -2.295187 |
| H  | -2.917881 | 5.625661  | -2.490513 |
| Cu | 0.468417  | 1.217117  | 0.177560  |
| N  | -0.810351 | -1.212926 | -0.825789 |
| N  | -1.899612 | 0.524043  | -1.524995 |
| C  | 1.822505  | 1.532443  | 1.731716  |
| C  | 0.569205  | 1.148205  | 2.352494  |
| H  | -1.955278 | -2.303266 | 1.230862  |

|    |           |           |           |
|----|-----------|-----------|-----------|
| H  | -3.642912 | -0.658406 | -1.703768 |
| H  | -1.219558 | -2.206544 | -2.642752 |
| H  | 2.047155  | 2.601642  | 1.744773  |
| C  | -0.450417 | 2.187084  | 2.553105  |
| C  | 0.346581  | -0.136157 | 3.030326  |
| O  | -0.035552 | 3.402179  | 2.163484  |
| O  | -1.590290 | 2.023602  | 2.966396  |
| O  | -0.645838 | -0.439867 | 3.673781  |
| O  | 1.371310  | -0.986075 | 2.928274  |
| C  | 1.231063  | -2.244553 | 3.579544  |
| H  | 1.175925  | -2.109948 | 4.668972  |
| H  | 2.130601  | -2.813872 | 3.319766  |
| H  | 0.325145  | -2.750794 | 3.220846  |
| C  | -0.990209 | 4.451090  | 2.156201  |
| H  | -1.755844 | 4.271094  | 1.386817  |
| H  | -0.435878 | 5.363664  | 1.912440  |
| H  | -1.476020 | 4.553063  | 3.135695  |
| C  | 0.253735  | -1.997402 | -0.224199 |
| H  | 0.678782  | -1.354488 | 0.561266  |
| C  | 1.368152  | -2.292616 | -1.228128 |
| C  | 1.830798  | -1.254091 | -2.049527 |
| C  | 1.992259  | -3.540536 | -1.328275 |
| C  | 2.880996  | -1.452336 | -2.940572 |
| H  | 1.379400  | -0.263025 | -1.975502 |
| C  | 3.049154  | -3.741539 | -2.220098 |
| H  | 1.665464  | -4.378792 | -0.711604 |
| C  | 3.497550  | -2.700914 | -3.029395 |
| H  | 3.223872  | -0.622819 | -3.563062 |
| H  | 3.521131  | -4.724630 | -2.280876 |
| H  | 4.324414  | -2.859863 | -3.724687 |
| C  | -0.321227 | -3.215971 | 0.501955  |
| H  | 0.516885  | -3.770459 | 0.951573  |
| H  | -0.790954 | -3.901780 | -0.233754 |
| O  | -1.184743 | -2.867900 | 1.531043  |
| C  | 2.839134  | 0.683754  | 1.255473  |
| H  | 2.659049  | -0.389686 | 1.217372  |
| C  | 4.061868  | 1.168420  | 0.789983  |
| H  | 4.356552  | 2.162758  | 1.132005  |
| C  | 5.183352  | 0.261162  | 0.457808  |
| C  | 6.503007  | 0.709595  | 0.613353  |
| C  | 4.973610  | -1.040452 | -0.026833 |
| C  | 7.582405  | -0.118139 | 0.308734  |
| H  | 6.683840  | 1.722451  | 0.983362  |
| C  | 6.051450  | -1.865193 | -0.335479 |
| H  | 3.958940  | -1.409283 | -0.192873 |
| C  | 7.360981  | -1.410095 | -0.167263 |
| H  | 8.601940  | 0.250362  | 0.442994  |
| H  | 5.863272  | -2.869585 | -0.721690 |
| H  | 8.204588  | -2.059180 | -0.412123 |
| C  | 1.309305  | 2.457836  | -1.207554 |
| H  | 0.509301  | 2.962711  | -1.750526 |
| C  | 2.563825  | 2.397519  | -1.355680 |
| C  | 3.884593  | 2.103982  | -1.261180 |
| H  | 4.594613  | 2.886546  | -0.982328 |
| H  | 4.285894  | 1.298237  | -1.884217 |
| Na | -2.692875 | -0.062239 | 2.750168  |
| O  | -3.298822 | -1.391054 | 1.083207  |
| C  | -4.308552 | -2.020369 | 0.555389  |
| C  | -4.264388 | -3.418364 | 0.289525  |
| C  | -5.508505 | -1.349562 | 0.191615  |
| C  | -5.331145 | -4.080627 | -0.311038 |
| H  | -3.364582 | -3.965874 | 0.584228  |
| C  | -6.568371 | -2.025615 | -0.407147 |
| H  | -5.583923 | -0.277299 | 0.389735  |
| C  | -6.495590 | -3.396354 | -0.671123 |
| H  | -5.252095 | -5.155895 | -0.497765 |
| H  | -7.472412 | -1.469531 | -0.673624 |
| H  | -7.330279 | -3.919786 | -1.142245 |
| H  | -1.519898 | 4.312349  | -4.069717 |
| H  | -3.887876 | 4.537440  | -0.482949 |
| C  | -3.617753 | 1.963901  | 0.326652  |
| H  | -3.517250 | 0.870022  | 0.309820  |
| H  | -3.123250 | 2.331323  | 1.239173  |
| H  | -4.685143 | 2.217382  | 0.408642  |
| C  | -0.824170 | 1.683132  | -3.900085 |
| H  | -0.260047 | 2.344223  | -4.571017 |
| H  | -0.108353 | 1.044899  | -3.363018 |
| H  | -1.444713 | 1.023599  | -4.527546 |

96

Figure\_S15-2\_PA-9b(NaOPh)-ts(1,6minor)\_04 / electronic energy: -3988.21355466 a.u. / lowest freq: -462.55 cm<sup>-1</sup>

|   |          |           |          |
|---|----------|-----------|----------|
| C | 2.669864 | -1.580950 | 1.448171 |
| H | 3.302887 | -1.969887 | 0.642104 |
| C | 3.141221 | -0.202102 | 1.912590 |
| H | 3.261398 | -0.129538 | 3.005043 |
| C | 1.006551 | 0.000027  | 0.966176 |
| C | 2.131050 | 2.081920  | 1.701338 |
| C | 3.035291 | 2.834309  | 0.930101 |
| C | 1.395567 | 2.669725  | 2.748713 |
| C | 3.182021 | 4.195697  | 1.215871 |

|    |           |           |           |
|----|-----------|-----------|-----------|
| C  | 1.555831  | 4.038934  | 2.984352  |
| C  | 2.445093  | 4.798063  | 2.229405  |
| H  | 2.567399  | 5.863513  | 2.435820  |
| Cu | -0.837961 | 0.562515  | 0.432757  |
| N  | 1.321235  | -1.296723 | 0.947529  |
| N  | 2.045131  | 0.676084  | 1.477206  |
| C  | -2.236240 | 1.396724  | -0.978693 |
| C  | -0.939204 | 1.231083  | -1.592682 |
| H  | 2.338256  | -2.135464 | -1.453576 |
| H  | 4.090595  | 0.088438  | 1.441709  |
| H  | 2.646068  | -2.320721 | 2.260989  |
| H  | -2.359955 | 2.362582  | -0.479212 |
| C  | -0.011211 | 2.372156  | -1.590732 |
| C  | -0.598912 | 0.088885  | -2.453378 |
| O  | -0.532807 | 3.461584  | -1.015025 |
| O  | 1.128330  | 2.385343  | -2.031274 |
| O  | 0.310784  | 0.040556  | -3.264978 |
| O  | -1.401622 | -0.964566 | -2.271143 |
| C  | -1.142466 | -2.125796 | -3.056161 |
| H  | -1.222874 | -1.894557 | -4.127295 |
| H  | -1.913959 | -2.850495 | -2.772538 |
| H  | -0.140130 | -2.515967 | -2.827980 |
| C  | 0.292070  | 4.611949  | -0.923205 |
| H  | 1.213958  | 4.389067  | -0.371916 |
| H  | -0.295389 | 5.362122  | -0.382878 |
| H  | 0.549245  | 4.987213  | -1.923994 |
| C  | 0.421961  | -2.326901 | 0.456753  |
| H  | -0.265995 | -1.826608 | -0.242249 |
| C  | -0.429368 | -2.952571 | 1.551031  |
| C  | -1.568916 | -3.675562 | 1.177789  |
| C  | -0.153973 | -2.800221 | 2.911984  |
| C  | -2.409989 | -4.233856 | 2.136510  |
| H  | -1.815007 | -3.783306 | 0.117699  |
| C  | -0.992775 | -3.360815 | 3.876666  |
| H  | 0.704767  | -2.210022 | 3.236287  |
| C  | -2.123048 | -4.079501 | 3.493612  |
| H  | -3.300727 | -4.782856 | 1.823147  |
| H  | -0.764528 | -3.222949 | 4.935856  |
| H  | -2.784661 | -4.509632 | 4.248507  |
| C  | 1.180103  | -3.375716 | -0.374527 |
| H  | 0.467687  | -4.180558 | -0.613471 |
| H  | 1.963421  | -3.840108 | 0.259080  |
| O  | 1.680911  | -2.882454 | -1.570661 |
| C  | -3.420211 | 0.662723  | -1.132282 |
| H  | -3.409628 | -0.257086 | -1.714019 |
| C  | -4.578955 | 1.041656  | -0.453338 |
| H  | -4.581090 | 2.051069  | -0.031282 |
| C  | -5.923399 | 0.538764  | -0.828214 |
| C  | -7.050492 | 1.328716  | -0.560789 |
| C  | -6.117223 | -0.712838 | -1.433736 |
| C  | -8.330931 | 0.891325  | -0.896594 |
| H  | -6.918825 | 2.303228  | -0.082762 |
| C  | -7.395362 | -1.151244 | -1.768821 |
| H  | -5.260853 | -1.359761 | -1.636035 |
| C  | -8.508846 | -0.351363 | -1.503023 |
| H  | -9.193993 | 1.525387  | -0.681289 |
| H  | -7.524970 | -2.128562 | -2.239303 |
| H  | -9.510703 | -0.698415 | -1.765006 |
| C  | -1.993930 | 0.035968  | 2.016974  |
| H  | -1.371005 | -0.355655 | 2.821318  |
| C  | -3.256232 | 0.091952  | 1.924257  |
| C  | -4.559788 | 0.184316  | 1.552761  |
| H  | -5.072435 | -0.745564 | 1.289949  |
| H  | -5.191194 | 0.956109  | 2.003728  |
| O  | 3.421689  | -0.927835 | -1.560886 |
| Na | 2.445465  | 0.645103  | -2.779092 |
| C  | 4.674051  | -1.271214 | -1.456858 |
| C  | 5.727365  | -0.335368 | -1.647117 |
| C  | 5.065648  | -2.601149 | -1.136491 |
| C  | 7.062691  | -0.698751 | -1.498877 |
| H  | 5.465848  | 0.691784  | -1.916246 |
| C  | 6.405186  | -2.951427 | -0.991395 |
| H  | 4.281594  | -3.356155 | -1.029880 |
| C  | 7.421377  | -2.007523 | -1.162560 |
| H  | 7.840617  | 0.055854  | -1.650153 |
| H  | 6.660142  | -3.986742 | -0.745470 |
| H  | 8.470615  | -2.286385 | -1.044660 |
| H  | 0.988412  | 4.508238  | 3.791811  |
| H  | 3.879310  | 4.789785  | 0.619759  |
| C  | 0.463227  | 1.865442  | 3.611916  |
| H  | -0.536568 | 1.804129  | 3.157155  |
| H  | 0.817589  | 0.833755  | 3.748381  |
| H  | 0.352767  | 2.330572  | 4.600688  |
| C  | 3.851727  | 2.216282  | -0.169960 |
| H  | 4.906280  | 2.121887  | 0.134333  |
| H  | 3.499333  | 1.213128  | -0.442469 |
| H  | 3.825692  | 2.853024  | -1.066256 |

96

Figure\_S15-2\_PA-9b(NaOPh)-ts(1,6minor)\_05 / electronic energy: -3988.21868997 a.u. / lowest freq: -417.87 cm<sup>-1</sup>

|    |           |           |           |
|----|-----------|-----------|-----------|
| C  | -1.771710 | -1.783857 | -1.728103 |
| H  | -2.363349 | -2.579641 | -1.256203 |
| C  | -2.642269 | -0.581067 | -2.104337 |
| H  | -2.737458 | -0.439997 | -3.189737 |
| C  | -0.899977 | 0.130613  | -0.713643 |
| C  | -2.214831 | 1.897009  | -1.768665 |
| C  | -3.023418 | 2.624791  | -0.883482 |
| C  | -1.687587 | 2.473532  | -2.941145 |
| C  | -3.265996 | 3.974321  | -1.171738 |
| C  | -1.954869 | 3.821023  | -3.191814 |
| C  | -2.733038 | 4.569269  | -2.309621 |
| H  | -2.928870 | 5.623633  | -2.516371 |
| Cu | 0.482618  | 1.228677  | 0.185860  |
| N  | -0.818470 | -1.198415 | -0.782967 |
| N  | -1.908530 | 0.533261  | -1.493454 |
| C  | 1.871928  | 1.557257  | 1.708793  |
| C  | 0.626534  | 1.195288  | 2.358059  |
| H  | -2.014212 | -2.292609 | 1.245778  |
| H  | -3.651805 | -0.649902 | -1.669836 |
| H  | -1.230097 | -2.209544 | -2.589079 |
| H  | 2.104961  | 2.624686  | 1.696685  |
| C  | -0.385511 | 2.244084  | 2.551097  |
| C  | 0.400197  | -0.075291 | 3.059724  |
| O  | 0.041909  | 3.456527  | 2.169469  |
| O  | -1.532200 | 2.084874  | 2.946598  |
| O  | -0.593194 | -0.361069 | 3.710422  |
| O  | 1.416707  | -0.936100 | 2.964151  |
| C  | 1.264361  | -2.185874 | 3.628767  |
| H  | 1.232052  | -2.041455 | 4.717833  |
| H  | 2.147226  | -2.775518 | 3.357395  |
| H  | 0.342283  | -2.679103 | 3.293976  |
| C  | -0.913276 | 4.505023  | 2.133904  |
| H  | -1.675057 | 4.307215  | 1.364903  |
| H  | -0.357590 | 5.412239  | 1.873896  |
| H  | -1.404261 | 4.627749  | 3.108433  |
| C  | 0.240124  | -1.980891 | -0.170329 |
| H  | 0.675008  | -1.326209 | 0.600316  |
| C  | 1.346332  | -2.310184 | -1.172015 |
| C  | 1.981561  | -3.555879 | -1.217726 |
| C  | 1.790179  | -1.309528 | -2.048554 |
| C  | 3.029118  | -3.792084 | -2.111508 |
| H  | 1.670340  | -4.364487 | -0.555288 |
| C  | 2.831793  | -1.542976 | -2.941461 |
| H  | 1.329079  | -0.320769 | -2.020460 |
| C  | 3.458070  | -2.789213 | -2.976996 |
| H  | 3.509375  | -4.772856 | -2.128652 |
| H  | 3.159275  | -0.743047 | -3.609227 |
| H  | 4.277673  | -2.975459 | -3.674046 |
| C  | -0.345389 | -3.179476 | 0.581861  |
| H  | 0.486031  | -3.722343 | 1.056957  |
| H  | -0.807222 | -3.884462 | -0.140157 |
| O  | -1.221918 | -2.799846 | 1.588841  |
| C  | 2.871327  | 0.690008  | 1.229588  |
| H  | 2.681297  | -0.382419 | 1.220170  |
| C  | 4.087894  | 1.153122  | 0.727029  |
| H  | 4.398419  | 2.152416  | 1.039221  |
| C  | 5.193843  | 0.228509  | 0.390599  |
| C  | 6.520510  | 0.669747  | 0.501177  |
| C  | 4.962028  | -1.083381 | -0.054454 |
| C  | 7.585483  | -0.174995 | 0.192623  |
| H  | 6.718448  | 1.691085  | 0.837602  |
| C  | 6.025426  | -1.925610 | -0.365815 |
| H  | 3.940824  | -1.447552 | -0.187700 |
| C  | 7.342256  | -1.477695 | -0.241622 |
| H  | 8.610878  | 0.188347  | 0.291775  |
| H  | 5.819924  | -2.938717 | -0.718922 |
| H  | 8.174239  | -2.140760 | -0.488691 |
| C  | 1.309935  | 2.438849  | -1.234264 |
| H  | 0.505853  | 2.945640  | -1.769392 |
| C  | 2.559613  | 2.356372  | -1.410142 |
| C  | 3.877863  | 2.045422  | -1.340980 |
| H  | 4.605267  | 2.822778  | -1.094273 |
| H  | 4.253090  | 1.221570  | -1.956627 |
| Na | -2.565241 | -0.040385 | 2.582500  |
| O  | -3.350840 | -1.395953 | 1.033513  |
| C  | -4.370264 | -2.033577 | 0.535795  |
| C  | -4.333572 | -3.436855 | 0.302566  |
| C  | -5.571416 | -1.365531 | 0.172835  |
| C  | -5.412245 | -4.109544 | -0.264431 |
| H  | -3.431273 | -3.981076 | 0.596622  |
| C  | -6.643100 | -2.051663 | -0.392128 |
| H  | -5.638557 | -0.288428 | 0.347444  |
| C  | -6.579484 | -3.429080 | -0.622262 |
| H  | -5.340320 | -5.189201 | -0.426769 |
| H  | -7.549198 | -1.498874 | -0.658264 |
| H  | -7.423608 | -3.960452 | -1.066804 |
| H  | -1.541151 | 4.290287  | -4.087570 |
| H  | -3.890755 | 4.559425  | -0.491934 |
| C  | -3.615539 | 1.995165  | 0.347112  |

|   |           |          |           |
|---|-----------|----------|-----------|
| H | -3.582898 | 0.897679 | 0.304699  |
| H | -3.065865 | 2.318011 | 1.245458  |
| H | -4.661322 | 2.310299 | 0.475086  |
| C | -0.849722 | 1.663026 | -3.894266 |
| H | -0.272855 | 2.316350 | -4.561982 |
| H | -0.146046 | 1.011565 | -3.357430 |
| H | -1.479758 | 1.016049 | -4.525434 |

96

Figure\_S15-2\_PA-9b(NaOPh)-ts(1,6minor)\_06 / electronic energy: -3988.21301922 a.u. / lowest freq: -426.05 cm<sup>-1</sup>

|    |           |           |           |
|----|-----------|-----------|-----------|
| C  | 1.674736  | -2.144028 | 1.237588  |
| H  | 2.237573  | -2.855498 | 0.619276  |
| C  | 2.585521  | -1.064924 | 1.827213  |
| H  | 2.722632  | -1.169581 | 2.911590  |
| C  | 0.823904  | -0.045419 | 0.668600  |
| C  | 2.285142  | 1.454467  | 1.907752  |
| C  | 2.908682  | 2.289815  | 0.964868  |
| C  | 2.075454  | 1.856947  | 3.238041  |
| C  | 3.300929  | 3.566942  | 1.377213  |
| C  | 2.483201  | 3.142196  | 3.608250  |
| C  | 3.086762  | 3.992395  | 2.685575  |
| H  | 3.395339  | 4.994993  | 2.989518  |
| Cu | -0.554956 | 1.301238  | 0.208956  |
| N  | 0.732598  | -1.357023 | 0.436486  |
| N  | 1.849383  | 0.161963  | 1.501834  |
| C  | -2.028461 | 2.104467  | -1.026509 |
| C  | -0.791545 | 2.119245  | -1.771430 |
| H  | 2.079752  | -2.192937 | -1.681048 |
| H  | 3.575970  | -1.047872 | 1.347833  |
| H  | 1.124668  | -2.707367 | 2.009619  |
| H  | -2.312966 | 3.081235  | -0.625113 |
| C  | -0.048242 | 3.392285  | -1.652980 |
| C  | -0.398752 | 1.099564  | -2.743447 |
| O  | 0.987202  | 3.525834  | -2.487815 |
| O  | -0.338584 | 4.269318  | -0.859894 |
| O  | 0.692701  | 0.991118  | -3.286154 |
| O  | -1.377344 | 0.229589  | -3.020815 |
| C  | -1.094696 | -0.803519 | -3.955496 |
| H  | -0.874470 | -0.378825 | -4.945086 |
| H  | -2.003976 | -1.412673 | -4.007984 |
| H  | -0.244916 | -1.413012 | -3.618006 |
| C  | 1.762757  | 4.702872  | -2.343599 |
| H  | 1.163937  | 5.601506  | -2.549111 |
| H  | 2.577048  | 4.622154  | -3.072330 |
| H  | 2.172811  | 4.779033  | -1.325897 |
| C  | -0.325715 | -1.978846 | -0.336499 |
| H  | -0.770242 | -1.162178 | -0.927729 |
| C  | -1.420990 | -2.554093 | 0.560532  |
| C  | -2.122399 | -3.721819 | 0.236557  |
| C  | -1.783838 | -1.866260 | 1.726599  |
| C  | -3.156412 | -4.184595 | 1.053093  |
| H  | -1.875888 | -4.289969 | -0.661343 |
| C  | -2.815562 | -2.325785 | 2.540866  |
| H  | -1.270347 | -0.942699 | 1.997744  |
| C  | -3.508559 | -3.488957 | 2.207116  |
| H  | -3.688328 | -5.098701 | 0.779983  |
| H  | -3.080386 | -1.766343 | 3.440973  |
| H  | -4.320484 | -3.849183 | 2.842139  |
| C  | 0.264097  | -2.975508 | -1.345027 |
| H  | -0.552223 | -3.335903 | -1.988770 |
| H  | 0.657235  | -3.862121 | -0.809821 |
| O  | 1.225881  | -2.398966 | -2.168457 |
| C  | -2.960284 | 1.063271  | -0.855826 |
| H  | -2.733930 | 0.070043  | -1.242121 |
| C  | -4.166467 | 1.261145  | -0.181037 |
| H  | -4.519148 | 2.292037  | -0.107468 |
| C  | -5.232551 | 0.234393  | -0.176595 |
| C  | -6.576991 | 0.631625  | -0.135157 |
| C  | -4.943431 | -1.139335 | -0.205938 |
| C  | -7.603648 | -0.311347 | -0.142765 |
| H  | -6.819033 | 1.697381  | -0.101309 |
| C  | -5.968291 | -2.080684 | -0.211923 |
| H  | -3.906007 | -1.481668 | -0.195989 |
| C  | -7.303483 | -1.672655 | -0.183898 |
| H  | -8.644135 | 0.020452  | -0.115439 |
| H  | -5.718524 | -3.144007 | -0.227290 |
| H  | -8.105399 | -2.414011 | -0.187127 |
| C  | -1.344224 | 1.846295  | 2.018249  |
| H  | -0.523971 | 2.146553  | 2.670862  |
| C  | -2.583850 | 1.671061  | 2.195759  |
| C  | -3.898448 | 1.363309  | 2.055927  |
| H  | -4.650390 | 2.152568  | 2.135493  |
| H  | -4.229887 | 0.359331  | 2.340590  |
| Na | 2.523993  | -0.240048 | -2.926787 |
| O  | 3.463239  | -1.473416 | -1.354314 |
| C  | 4.450565  | -2.142274 | -0.832596 |
| C  | 4.414995  | -3.557842 | -0.713338 |
| C  | 5.604669  | -1.491688 | -0.320194 |
| C  | 5.453281  | -4.263362 | -0.110913 |
| H  | 3.546131  | -4.086769 | -1.117278 |

|   |          |           |           |
|---|----------|-----------|-----------|
| C | 6.636864 | -2.209179 | 0.277729  |
| H | 5.662338 | -0.402541 | -0.402596 |
| C | 6.575068 | -3.601139 | 0.394787  |
| H | 5.384389 | -5.352599 | -0.034652 |
| H | 7.507461 | -1.670993 | 0.664176  |
| H | 7.386814 | -4.157699 | 0.867874  |
| H | 2.316125 | 3.480350  | 4.633786  |
| H | 3.787927 | 4.233074  | 0.660478  |
| C | 3.134768 | 1.825574  | -0.448384 |
| H | 3.431809 | 0.766091  | -0.488800 |
| H | 2.210535 | 1.923278  | -1.038980 |
| H | 3.907566 | 2.433688  | -0.938787 |
| C | 1.428204 | 0.936534  | 4.239043  |
| H | 0.973905 | 1.507134  | 5.060239  |
| H | 0.648677 | 0.317057  | 3.772571  |
| H | 2.168599 | 0.252599  | 4.684779  |

96

Figure\_S15-2\_PA-9b(NaOPh)-ts(1,6minor)\_07 / electronic energy: -3988.21538734 a.u. / lowest freq: -421.57 cm-1

|    |           |           |           |
|----|-----------|-----------|-----------|
| C  | -1.762942 | -1.724382 | -1.759653 |
| H  | -2.381504 | -2.506352 | -1.298391 |
| C  | -2.599641 | -0.504720 | -2.162073 |
| H  | -2.664162 | -0.367483 | -3.250058 |
| C  | -0.880452 | 0.177577  | -0.730000 |
| C  | -2.143166 | 1.967071  | -1.809682 |
| C  | -2.911177 | 2.714720  | -0.904192 |
| C  | -1.630278 | 2.530495  | -2.994223 |
| C  | -3.140009 | 4.065597  | -1.194459 |
| C  | -1.883884 | 3.880788  | -3.246495 |
| C  | -2.630213 | 4.645007  | -2.351393 |
| H  | -2.816669 | 5.700673  | -2.560127 |
| Cu | 0.534011  | 1.207727  | 0.204238  |
| N  | -0.821094 | -1.152516 | -0.795924 |
| N  | -1.859119 | 0.598222  | -1.536686 |
| C  | 1.970428  | 1.449727  | 1.694163  |
| C  | 0.758138  | 1.029520  | 2.372108  |
| H  | -2.190753 | -2.195321 | 1.168406  |
| H  | -3.620744 | -0.550234 | -1.753176 |
| H  | -1.210826 | -2.166235 | -2.605439 |
| H  | 2.187521  | 2.520216  | 1.720967  |
| C  | -0.249238 | 2.050428  | 2.686049  |
| C  | 0.696373  | -0.309743 | 2.981491  |
| O  | 0.171566  | 3.295741  | 2.426861  |
| O  | -1.393083 | 1.851354  | 3.076559  |
| O  | 1.525467  | -1.184016 | 2.824273  |
| O  | -0.357096 | -0.509646 | 3.800549  |
| C  | -0.379760 | -1.752410 | 4.500428  |
| H  | -0.550836 | -2.573484 | 3.792714  |
| H  | -1.214268 | -1.679120 | 5.207374  |
| H  | 0.561838  | -1.907825 | 5.042905  |
| C  | -0.780134 | 4.343532  | 2.527206  |
| H  | -1.554766 | 4.239549  | 1.753045  |
| H  | -0.225048 | 5.273730  | 2.366750  |
| H  | -1.256886 | 4.352022  | 3.516234  |
| C  | 0.196665  | -1.942457 | -0.129886 |
| H  | 0.657152  | -1.263536 | 0.601244  |
| C  | 1.302590  | -2.372532 | -1.088078 |
| C  | 1.914462  | -3.627940 | -1.013939 |
| C  | 1.781750  | -1.454438 | -2.034414 |
| C  | 2.974821  | -3.957230 | -1.861593 |
| H  | 1.575686  | -4.369074 | -0.288910 |
| C  | 2.835812  | -1.782107 | -2.882521 |
| H  | 1.337009  | -0.458760 | -2.098034 |
| C  | 3.438148  | -3.038216 | -2.799547 |
| H  | 3.439141  | -4.942716 | -1.783499 |
| H  | 3.193518  | -1.047631 | -3.607460 |
| H  | 4.268108  | -3.296164 | -3.460667 |
| C  | -0.442119 | -3.060638 | 0.699379  |
| H  | 0.355592  | -3.554307 | 1.273957  |
| H  | -0.880530 | -3.828312 | 0.029974  |
| O  | -1.372689 | -2.569722 | 1.609821  |
| C  | 2.968504  | 0.606380  | 1.172656  |
| H  | 2.787728  | -0.467606 | 1.161175  |
| C  | 4.164455  | 1.096784  | 0.648027  |
| H  | 4.459131  | 2.102369  | 0.956666  |
| C  | 5.284265  | 0.198587  | 0.286245  |
| C  | 6.599794  | 0.682477  | 0.332941  |
| C  | 5.075697  | -1.129084 | -0.121283 |
| C  | 7.677495  | -0.134965 | -0.003412 |
| H  | 6.779066  | 1.716526  | 0.639842  |
| C  | 6.151673  | -1.944409 | -0.459998 |
| H  | 4.062229  | -1.528885 | -0.198789 |
| C  | 7.457671  | -1.453465 | -0.400975 |
| H  | 8.693999  | 0.262088  | 0.045429  |
| H  | 5.963926  | -2.971900 | -0.780050 |
| H  | 8.299502  | -2.095896 | -0.668593 |
| C  | 1.340794  | 2.422148  | -1.221292 |
| H  | 0.530227  | 2.937797  | -1.738035 |
| C  | 2.582149  | 2.312943  | -1.438001 |
| C  | 3.895184  | 1.973981  | -1.411724 |



|    |           |           |           |
|----|-----------|-----------|-----------|
| H  | 4.647073  | 2.737758  | -1.197845 |
| H  | 4.230992  | 1.139584  | -2.036077 |
| Na | -2.407353 | -0.177331 | 2.490297  |
| O  | -3.497742 | -1.299587 | 0.923459  |
| C  | -4.516184 | -1.886207 | 0.364539  |
| C  | -4.526554 | -3.286207 | 0.114920  |
| C  | -5.664500 | -1.161228 | -0.053448 |
| C  | -5.601442 | -3.905875 | -0.516314 |
| H  | -3.665014 | -3.874246 | 0.446256  |
| C  | -6.733041 | -1.793965 | -0.682883 |
| H  | -5.691860 | -0.083866 | 0.130781  |
| C  | -6.717161 | -3.170593 | -0.925846 |
| H  | -5.567913 | -4.985756 | -0.688901 |
| H  | -7.598159 | -1.199005 | -0.990975 |
| H  | -7.558962 | -3.660161 | -1.420055 |
| H  | -1.481809 | 4.339548  | -4.152947 |
| H  | -3.735635 | 4.665056  | -0.501298 |
| C  | -3.464784 | 2.102969  | 0.353118  |
| H  | -3.582296 | 1.013564  | 0.266617  |
| H  | -2.793733 | 2.296649  | 1.205748  |
| H  | -4.439301 | 2.546658  | 0.601400  |
| C  | -0.811496 | 1.707659  | -3.953287 |
| H  | -0.231459 | 2.353278  | -4.625725 |
| H  | -0.111351 | 1.049959  | -3.418666 |
| H  | -1.452446 | 1.066972  | -4.579782 |

96

Figure\_S15-2\_PA-9b(Na0Ph)-ts(1,6minor)\_08 / electronic energy: -3988.21376729 a.u. / lowest freq: -435.90 cm-1

|    |           |           |           |
|----|-----------|-----------|-----------|
| C  | 1.785568  | -1.972006 | 1.393388  |
| H  | 2.364716  | -2.721021 | 0.837527  |
| C  | 2.665814  | -0.811765 | 1.865234  |
| H  | 2.822424  | -0.809464 | 2.952227  |
| C  | 0.854095  | 0.033912  | 0.647299  |
| C  | 2.279849  | 1.694046  | 1.705229  |
| C  | 2.863961  | 2.441916  | 0.667542  |
| C  | 2.077788  | 2.229315  | 2.988612  |
| C  | 3.226538  | 3.764823  | 0.936858  |
| C  | 2.450929  | 3.558324  | 3.213763  |
| C  | 3.017590  | 4.321318  | 2.196412  |
| H  | 3.301532  | 5.358469  | 2.387479  |
| Cu | -0.570599 | 1.284349  | 0.078269  |
| N  | 0.808132  | -1.295305 | 0.536104  |
| N  | 1.880365  | 0.353592  | 1.443040  |
| C  | -2.053004 | 1.930872  | -1.227027 |
| C  | -0.818368 | 1.884430  | -1.975586 |
| H  | 2.160977  | -2.252636 | -1.531382 |
| H  | 3.647598  | -0.805868 | 1.367552  |
| H  | 1.264033  | -2.476806 | 2.223655  |
| H  | -2.368781 | 2.932300  | -0.924289 |
| C  | -0.021660 | 3.125814  | -2.064734 |
| C  | -0.418033 | 0.785137  | -2.852282 |
| O  | -0.355001 | 3.999807  | -1.089321 |
| O  | 0.843086  | 3.386495  | -2.871030 |
| O  | 0.678119  | 0.657092  | -3.379539 |
| O  | -1.377382 | -0.124693 | -3.051935 |
| C  | -1.064969 | -1.235686 | -3.882874 |
| H  | -0.871931 | -0.904717 | -4.913250 |
| H  | -1.949796 | -1.881666 | -3.861616 |
| H  | -0.187191 | -1.772015 | -3.497362 |
| C  | 0.346500  | 5.229887  | -1.069988 |
| H  | 1.423037  | 5.061130  | -0.926776 |
| H  | -0.056270 | 5.797311  | -0.223931 |
| H  | 0.193673  | 5.785906  | -2.005976 |
| C  | -0.231082 | -2.018150 | -0.172636 |
| H  | -0.702963 | -1.271095 | -0.830619 |
| C  | -1.305899 | -2.548058 | 0.775162  |
| C  | -1.962466 | -3.765584 | 0.558623  |
| C  | -1.699317 | -1.769828 | 1.872594  |
| C  | -2.982985 | -4.189860 | 1.412011  |
| H  | -1.689862 | -4.405030 | -0.281861 |
| C  | -2.717608 | -2.191225 | 2.723861  |
| H  | -1.221456 | -0.806473 | 2.057117  |
| C  | -3.365679 | -3.405175 | 2.497078  |
| H  | -3.479725 | -5.144086 | 1.223018  |
| H  | -3.008463 | -1.561047 | 3.567380  |
| H  | -4.166586 | -3.735646 | 3.161617  |
| C  | 0.386343  | -3.079866 | -1.094561 |
| H  | -0.424522 | -3.529035 | -1.687707 |
| H  | 0.818627  | -3.897968 | -0.484643 |
| O  | 1.313391  | -2.548402 | -1.983513 |
| C  | -2.962429 | 0.890268  | -0.955175 |
| H  | -2.711426 | -0.131502 | -1.238978 |
| C  | -4.174485 | 1.124489  | -0.301294 |
| H  | -4.556834 | 2.146870  | -0.339482 |
| C  | -5.214439 | 0.075671  | -0.196591 |
| C  | -6.568469 | 0.440563  | -0.202250 |
| C  | -4.890768 | -1.285997 | -0.082659 |
| C  | -7.571342 | -0.523894 | -0.115978 |
| H  | -6.837163 | 1.497349  | -0.282530 |
| C  | -5.892032 | -2.248710 | 0.005109  |

|    |           |           |           |
|----|-----------|-----------|-----------|
| H  | -3.844920 | -1.598144 | -0.033295 |
| C  | -7.237203 | -1.874014 | -0.014306 |
| H  | -8.620059 | -0.218100 | -0.128833 |
| H  | -5.616294 | -3.301250 | 0.101401  |
| H  | -8.020594 | -2.631779 | 0.055510  |
| C  | -1.367256 | 1.956617  | 1.841174  |
| H  | -0.551242 | 2.317278  | 2.467525  |
| C  | -2.606383 | 1.787857  | 2.024987  |
| C  | -3.917692 | 1.455289  | 1.901987  |
| H  | -4.675986 | 2.242541  | 1.907713  |
| H  | -4.242312 | 0.482937  | 2.286659  |
| Na | 2.600444  | -0.410795 | -2.984311 |
| O  | 3.525847  | -1.484258 | -1.283674 |
| C  | 4.521605  | -2.113929 | -0.729940 |
| C  | 4.496757  | -3.520244 | -0.526083 |
| C  | 5.675540  | -1.426491 | -0.268033 |
| C  | 5.546779  | -4.182527 | 0.104300  |
| H  | 3.627203  | -4.077217 | -0.888654 |
| C  | 6.719382  | -2.101169 | 0.358895  |
| H  | 5.724525  | -0.343731 | -0.414934 |
| C  | 6.669657  | -3.484432 | 0.556758  |
| H  | 5.486872  | -5.265988 | 0.243890  |
| H  | 7.590361  | -1.535300 | 0.702786  |
| H  | 7.491454  | -4.007161 | 1.050713  |
| H  | 2.288947  | 3.998812  | 4.200585  |
| H  | 3.687719  | 4.362098  | 0.146257  |
| C  | 3.086675  | 1.833959  | -0.689891 |
| H  | 3.457605  | 0.800001  | -0.617491 |
| H  | 2.144797  | 1.796074  | -1.259079 |
| H  | 3.798534  | 2.433808  | -1.273012 |
| C  | 1.477288  | 1.401054  | 4.093992  |
| H  | 0.993848  | 2.040825  | 4.844689  |
| H  | 0.731393  | 0.691026  | 3.708728  |
| H  | 2.252490  | 0.814610  | 4.613486  |

96

Figure\_S15-2\_PA-9b(NaOPh)-ts(1,6minor)\_09 / electronic energy: -3988.20604707 a.u. / lowest freq: -449.99 cm-1

|    |           |           |           |
|----|-----------|-----------|-----------|
| C  | 2.416792  | -1.605250 | 1.749273  |
| H  | 3.069782  | -2.149551 | 1.057244  |
| C  | 3.012806  | -0.246490 | 2.133857  |
| H  | 3.080152  | -0.098727 | 3.222606  |
| C  | 0.993915  | 0.095475  | 0.997007  |
| C  | 2.267013  | 2.112635  | 1.611456  |
| C  | 3.236381  | 2.676800  | 0.759801  |
| C  | 1.558977  | 2.903893  | 2.534080  |
| C  | 3.440795  | 4.058722  | 0.803976  |
| C  | 1.783127  | 4.285307  | 2.533454  |
| C  | 2.707656  | 4.862647  | 1.670941  |
| H  | 2.870662  | 5.942396  | 1.686470  |
| Cu | -0.773887 | 0.779438  | 0.371271  |
| N  | 1.166393  | -1.224078 | 1.084935  |
| N  | 2.047851  | 0.702397  | 1.560789  |
| C  | -2.174961 | 1.427305  | -1.106700 |
| C  | -0.881118 | 1.208085  | -1.715018 |
| H  | 2.312709  | -2.460484 | -1.125887 |
| H  | 4.014075  | -0.099823 | 1.704970  |
| H  | 2.225933  | -2.241751 | 2.625001  |
| H  | -2.302431 | 2.459658  | -0.762091 |
| C  | -0.042831 | 2.423594  | -1.780245 |
| C  | -0.544421 | 0.013366  | -2.495511 |
| O  | 1.197314  | 2.255122  | -2.292350 |
| O  | -0.396985 | 3.515943  | -1.388544 |
| O  | 0.416026  | -0.127946 | -3.238267 |
| O  | -1.407909 | -0.994361 | -2.326319 |
| C  | -1.128627 | -2.211696 | -3.013916 |
| H  | -1.084164 | -2.044071 | -4.098365 |
| H  | -1.959748 | -2.884196 | -2.773000 |
| H  | -0.176334 | -2.635979 | -2.662126 |
| C  | 1.942709  | 3.450873  | -2.497409 |
| H  | 1.395350  | 4.137284  | -3.157099 |
| H  | 2.879701  | 3.144523  | -2.977095 |
| H  | 2.145952  | 3.953074  | -1.542690 |
| C  | 0.210432  | -2.170096 | 0.520392  |
| H  | -0.243221 | -1.661017 | -0.340918 |
| C  | -0.929303 | -2.523374 | 1.459068  |
| C  | -2.202018 | -2.715298 | 0.909383  |
| C  | -0.769257 | -2.648399 | 2.840576  |
| C  | -3.292851 | -3.020031 | 1.718306  |
| H  | -2.344346 | -2.585944 | -0.166949 |
| C  | -1.860390 | -2.952779 | 3.655552  |
| H  | 0.208208  | -2.487085 | 3.298877  |
| C  | -3.124767 | -3.137345 | 3.098279  |
| H  | -4.281444 | -3.149495 | 1.271686  |
| H  | -1.720260 | -3.041245 | 4.735159  |
| H  | -3.978929 | -3.367390 | 3.738859  |
| C  | 0.900850  | -3.411299 | -0.063758 |
| H  | 0.105183  | -4.135933 | -0.298215 |
| H  | 1.526507  | -3.887641 | 0.719205  |
| O  | 1.603869  | -3.159418 | -1.234506 |
| C  | -3.342741 | 0.651043  | -1.115291 |

|    |           |           |           |
|----|-----------|-----------|-----------|
| H  | -3.313999 | -0.354426 | -1.529082 |
| C  | -4.513537 | 1.118266  | -0.517110 |
| H  | -4.559536 | 2.191722  | -0.312893 |
| C  | -5.831266 | 0.486765  | -0.771587 |
| C  | -6.991050 | 1.273334  | -0.738515 |
| C  | -5.966391 | -0.886344 | -1.032775 |
| C  | -8.246241 | 0.712096  | -0.971086 |
| H  | -6.905211 | 2.343335  | -0.531189 |
| C  | -7.218840 | -1.448285 | -1.262707 |
| H  | -5.082343 | -1.528266 | -1.040370 |
| C  | -8.365876 | -0.651508 | -1.234569 |
| H  | -9.135843 | 1.345647  | -0.945231 |
| H  | -7.303091 | -2.519267 | -1.460668 |
| H  | -9.347762 | -1.095008 | -1.413037 |
| C  | -1.900632 | 0.605730  | 2.054174  |
| H  | -1.266060 | 0.337496  | 2.897510  |
| C  | -3.163111 | 0.682185  | 1.990349  |
| C  | -4.472654 | 0.710513  | 1.635482  |
| H  | -4.987638 | -0.252380 | 1.572522  |
| H  | -5.095642 | 1.562605  | 1.924165  |
| O  | 3.459862  | -1.326233 | -1.236083 |
| Na | 2.502152  | 0.198209  | -2.502579 |
| C  | 4.688512  | -1.709204 | -1.027811 |
| C  | 5.795665  | -0.873889 | -1.337181 |
| C  | 4.995664  | -2.981017 | -0.471229 |
| C  | 7.104316  | -1.271043 | -1.078965 |
| H  | 5.597660  | 0.100319  | -1.793269 |
| C  | 6.309270  | -3.366123 | -0.216689 |
| H  | 4.170466  | -3.669416 | -0.267732 |
| C  | 7.380104  | -2.517216 | -0.508507 |
| H  | 7.926371  | -0.594383 | -1.330975 |
| H  | 6.499881  | -4.353210 | 0.215024  |
| H  | 8.408581  | -2.823468 | -0.306153 |
| H  | 1.226883  | 4.911652  | 3.235179  |
| H  | 4.186046  | 4.506564  | 0.141518  |
| C  | 0.589524  | 2.321109  | 3.524807  |
| H  | -0.447500 | 2.458176  | 3.185206  |
| H  | 0.749555  | 1.245655  | 3.676188  |
| H  | 0.689663  | 2.825827  | 4.495905  |
| C  | 4.080580  | 1.830604  | -0.151290 |
| H  | 5.070821  | 1.652179  | 0.297882  |
| H  | 3.643416  | 0.841772  | -0.341808 |
| H  | 4.260649  | 2.341219  | -1.108405 |

32

Figure\_S15-3\_dienoate / electronic energy: -841.927078481 a.u. / lowest freq: 24.55 cm-1

|   |           |           |           |
|---|-----------|-----------|-----------|
| C | -0.660544 | -0.726572 | 0.059153  |
| C | -1.860539 | -0.097447 | 0.115996  |
| H | -0.691600 | -1.818492 | -0.004770 |
| C | -1.976243 | 1.390665  | 0.160143  |
| C | -3.120576 | -0.891785 | 0.187355  |
| O | -3.041424 | 1.823605  | -0.507466 |
| O | -1.182749 | 2.134043  | 0.689285  |
| O | -4.147702 | -0.497504 | 0.683440  |
| O | -2.981802 | -2.118850 | -0.320932 |
| C | -4.097604 | -2.989729 | -0.195724 |
| H | -4.332384 | -3.170881 | 0.862818  |
| H | -3.810049 | -3.927003 | -0.683244 |
| H | -4.981752 | -2.562067 | -0.688186 |
| C | -3.254671 | 3.228152  | -0.535442 |
| H | -3.354009 | 3.627502  | 0.483524  |
| H | -4.184056 | 3.384216  | -1.092621 |
| H | -2.420438 | 3.737793  | -1.038016 |
| C | 0.656646  | -0.129211 | 0.062308  |
| H | 0.725624  | 0.955889  | 0.150505  |
| C | 1.759981  | -0.902956 | -0.019704 |
| H | 1.621029  | -1.988149 | -0.089650 |
| C | 3.156351  | -0.453635 | -0.025165 |
| C | 4.175093  | -1.416830 | -0.109525 |
| C | 3.522207  | 0.902114  | 0.053056  |
| C | 5.517020  | -1.042840 | -0.114390 |
| H | 3.907556  | -2.474776 | -0.172060 |
| C | 4.861836  | 1.275255  | 0.048166  |
| H | 2.754752  | 1.675486  | 0.118691  |
| C | 5.863995  | 0.305241  | -0.035401 |
| H | 6.294080  | -1.807149 | -0.179427 |
| H | 5.127957  | 2.332459  | 0.111300  |
| H | 6.914980  | 0.602284  | -0.038425 |

51

Figure\_S15-3\_9d(Na)-Cu-allenyl / electronic energy: -2839.06020575 a.u. / lowest freq: 14.37 cm-1

|   |           |           |           |
|---|-----------|-----------|-----------|
| C | 1.401449  | -2.075087 | 0.781893  |
| H | 1.679476  | -1.881296 | 1.831858  |
| C | -0.006213 | -2.648365 | 0.652932  |
| H | -0.062301 | -3.424044 | -0.128912 |
| C | 0.006182  | -0.440008 | -0.139162 |
| C | -2.189160 | -1.531257 | 0.133738  |
| C | -2.845361 | -2.761728 | 0.235329  |
| C | -2.951250 | -0.369985 | -0.075492 |
| C | -4.240763 | -2.845245 | 0.119017  |
| C | -4.334525 | -0.435941 | -0.206321 |

|    |           |           |           |
|----|-----------|-----------|-----------|
| C  | -4.972785 | -1.681355 | -0.104919 |
| H  | -6.061043 | -1.738645 | -0.201130 |
| Cu | -0.329372 | 1.490047  | -0.372686 |
| N  | 1.273764  | -0.812875 | 0.054580  |
| N  | -0.787308 | -1.470553 | 0.258845  |
| Na | 0.498306  | 3.958728  | 1.355621  |
| H  | -0.381218 | -3.078008 | 1.591814  |
| H  | 2.168593  | -2.723176 | 0.339289  |
| C  | 2.372398  | 0.146754  | -0.035438 |
| H  | 2.178954  | 0.736216  | -0.947149 |
| C  | 3.689483  | -0.579021 | -0.225630 |
| C  | 4.620192  | -0.739015 | 0.805951  |
| C  | 3.975802  | -1.139609 | -1.477409 |
| C  | 5.810682  | -1.435686 | 0.589342  |
| H  | 4.421442  | -0.318405 | 1.793568  |
| C  | 5.159152  | -1.840488 | -1.696033 |
| H  | 3.252345  | -1.025120 | -2.289480 |
| C  | 6.083241  | -1.989386 | -0.660216 |
| H  | 6.529017  | -1.546552 | 1.404836  |
| H  | 5.363247  | -2.270600 | -2.679186 |
| H  | 7.015148  | -2.533630 | -0.828612 |
| C  | 2.308388  | 1.165951  | 1.128058  |
| H  | 3.266929  | 1.737018  | 1.072498  |
| H  | 2.373701  | 0.583431  | 2.082237  |
| O  | 1.207712  | 1.962082  | 1.066314  |
| C  | -5.135842 | 0.816899  | -0.451875 |
| H  | -5.658483 | 0.763844  | -1.419613 |
| H  | -5.904556 | 0.954837  | 0.324125  |
| H  | -4.492476 | 1.707881  | -0.461773 |
| C  | -4.919272 | -4.186120 | 0.236349  |
| H  | -6.004229 | -4.101088 | 0.086278  |
| H  | -4.527345 | -4.895642 | -0.508698 |
| H  | -4.747592 | -4.631017 | 1.228910  |
| H  | -2.283360 | -3.682514 | 0.397907  |
| H  | -2.449009 | 0.596199  | -0.147487 |
| C  | -1.307163 | 3.029167  | -1.145241 |
| H  | -1.961130 | 2.829821  | -2.012024 |
| C  | -1.311845 | 4.265224  | -0.742674 |
| C  | -1.248636 | 5.503922  | -0.256051 |
| H  | -0.536999 | 6.236564  | -0.653695 |
| H  | -1.960491 | 5.856163  | 0.499142  |

83

Figure\_S15-3\_PA-9d(Na)-ts(1,6major)\_01 / electronic energy: -3681.01695194 a.u. / lowest freq: -446.94 cm<sup>-1</sup>

|    |           |           |           |
|----|-----------|-----------|-----------|
| C  | -3.226581 | 2.332635  | -1.099792 |
| H  | -3.981826 | 2.696365  | -0.392182 |
| C  | -1.952093 | 3.174225  | -1.130718 |
| H  | -1.864290 | 3.800961  | -2.028060 |
| C  | -1.393366 | 0.950832  | -0.697085 |
| C  | 0.460213  | 2.435636  | -1.287072 |
| C  | 0.945886  | 3.722322  | -1.043710 |
| C  | 1.334004  | 1.439963  | -1.738679 |
| C  | 2.307971  | 4.007354  | -1.191490 |
| C  | 2.692364  | 1.707668  | -1.903845 |
| C  | 3.170185  | 2.991641  | -1.611807 |
| H  | 4.235084  | 3.207680  | -1.735868 |
| Cu | -0.361303 | -0.618995 | -0.050701 |
| N  | -2.713169 | 1.039318  | -0.632534 |
| N  | -0.905783 | 2.145518  | -1.100657 |
| C  | 0.758401  | -1.298588 | 1.616162  |
| C  | -0.230641 | -0.363073 | 2.094236  |
| H  | -1.871191 | 3.822340  | -0.241903 |
| H  | -3.680267 | 2.225737  | -2.098989 |
| H  | 0.493335  | -2.346059 | 1.780902  |
| C  | -0.020004 | 1.079559  | 2.270752  |
| C  | -1.484968 | -0.915010 | 2.625198  |
| O  | 1.249904  | 1.456008  | 2.100822  |
| O  | -0.883817 | 1.904959  | 2.528767  |
| O  | -2.318296 | -0.324773 | 3.292244  |
| O  | -1.673477 | -2.201496 | 2.290638  |
| C  | -2.859367 | -2.820510 | 2.762928  |
| H  | -2.855723 | -2.891668 | 3.859795  |
| H  | -2.874378 | -3.822245 | 2.320724  |
| H  | -3.747949 | -2.253603 | 2.449506  |
| C  | 1.547858  | 2.835952  | 2.240397  |
| H  | 0.879199  | 3.446561  | 1.620801  |
| H  | 2.582406  | 2.958716  | 1.900916  |
| H  | 1.454117  | 3.145937  | 3.291059  |
| C  | -3.566652 | -0.077618 | -0.245289 |
| H  | -3.087142 | -0.548829 | 0.626715  |
| C  | -3.677318 | -1.125759 | -1.329634 |
| C  | -4.017204 | -2.437128 | -0.974302 |
| C  | -3.449762 | -0.842212 | -2.680603 |
| C  | -4.121438 | -3.438724 | -1.937160 |
| H  | -4.185433 | -2.678822 | 0.078175  |
| C  | -3.552282 | -1.842158 | -3.648364 |
| H  | -3.162875 | 0.166087  | -2.985815 |
| C  | -3.887032 | -3.145110 | -3.281016 |
| H  | -4.375793 | -4.457366 | -1.635430 |
| H  | -3.362611 | -1.601552 | -4.696926 |

|    |           |           |           |
|----|-----------|-----------|-----------|
| H  | -3.959099 | -3.929365 | -4.037584 |
| C  | -4.933617 | 0.463474  | 0.278907  |
| H  | -5.513112 | -0.464153 | 0.535180  |
| H  | -5.464197 | 0.858009  | -0.635511 |
| O  | -4.791623 | 1.347635  | 1.273688  |
| C  | 2.055796  | -1.075617 | 1.129882  |
| H  | 2.393609  | -0.054898 | 0.960302  |
| C  | 2.882028  | -2.152242 | 0.795953  |
| H  | 2.592116  | -3.122015 | 1.207031  |
| C  | 4.339205  | -2.001103 | 0.570172  |
| C  | 5.155568  | -3.143319 | 0.570779  |
| C  | 4.948676  | -0.753766 | 0.365609  |
| C  | 6.529716  | -3.046902 | 0.366110  |
| H  | 4.700613  | -4.124286 | 0.733326  |
| C  | 6.322585  | -0.655618 | 0.159318  |
| H  | 4.348155  | 0.157691  | 0.365763  |
| C  | 7.120357  | -1.800509 | 0.156326  |
| H  | 7.143096  | -3.950819 | 0.372049  |
| H  | 6.774847  | 0.326349  | 0.002250  |
| H  | 8.197466  | -1.720166 | -0.004761 |
| C  | 3.601725  | 0.638271  | -2.448500 |
| H  | 3.372100  | -0.339092 | -2.001760 |
| H  | 3.471570  | 0.539741  | -3.538049 |
| H  | 4.659430  | 0.863134  | -2.255186 |
| C  | 2.821235  | 5.385935  | -0.866739 |
| H  | 3.884285  | 5.493178  | -1.121541 |
| H  | 2.257610  | 6.158775  | -1.410789 |
| H  | 2.708425  | 5.598582  | 0.208281  |
| H  | 0.270188  | 4.511381  | -0.707593 |
| H  | 0.945888  | 0.449890  | -1.984325 |
| C  | -0.044963 | -2.021817 | -1.478777 |
| H  | -0.905887 | -2.059369 | -2.149181 |
| C  | 1.088129  | -2.582247 | -1.459085 |
| C  | 2.362775  | -2.985956 | -1.204035 |
| H  | 2.534802  | -4.016903 | -0.882160 |
| H  | 3.171656  | -2.544415 | -1.794630 |
| Na | -3.199420 | 1.713999  | 2.660794  |

83

Figure\_S15-3\_PA-9d(Na)-ts(1,6major)\_02 / electronic energy: -3681.01674239 a.u. / lowest freq: -425.84 cm-1

|    |           |           |           |
|----|-----------|-----------|-----------|
| C  | 2.866803  | 2.675946  | 1.037241  |
| H  | 3.618483  | 3.073400  | 0.344267  |
| C  | 1.496643  | 3.345149  | 0.935558  |
| H  | 1.285729  | 4.038149  | 1.760640  |
| C  | 1.246966  | 1.039170  | 0.692392  |
| C  | -0.796962 | 2.290790  | 1.180897  |
| C  | -1.490484 | 3.438376  | 0.798338  |
| C  | -1.479557 | 1.247321  | 1.820637  |
| C  | -2.874586 | 3.531001  | 0.998245  |
| C  | -2.851518 | 1.327151  | 2.045160  |
| C  | -3.540848 | 2.470137  | 1.614215  |
| H  | -4.618525 | 2.543255  | 1.788127  |
| Cu | 0.443095  | -0.673683 | 0.087133  |
| N  | 2.545629  | 1.293601  | 0.660974  |
| N  | 0.593216  | 2.188102  | 0.972750  |
| C  | -0.520351 | -1.415746 | -1.646627 |
| C  | 0.525645  | -0.530428 | -2.098307 |
| Na | 3.541048  | 1.559954  | -2.683597 |
| H  | 1.377226  | 3.887276  | -0.017588 |
| H  | 3.266719  | 2.708454  | 2.064537  |
| H  | -0.293059 | -2.477742 | -1.765329 |
| C  | 0.359803  | 0.903986  | -2.362672 |
| C  | 1.798868  | -1.136899 | -2.511518 |
| O  | -0.906702 | 1.322018  | -2.270671 |
| O  | 1.249489  | 1.695745  | -2.636288 |
| O  | 2.729106  | -0.577606 | -3.070754 |
| O  | 1.883062  | -2.439152 | -2.201216 |
| C  | 3.067140  | -3.118499 | -2.585350 |
| H  | 3.157940  | -3.161586 | -3.680079 |
| H  | 2.981622  | -4.130150 | -2.174801 |
| H  | 3.957585  | -2.618517 | -2.178973 |
| C  | -1.154302 | 2.696016  | -2.515703 |
| H  | -0.506982 | 3.328730  | -1.895213 |
| H  | -2.204989 | 2.866151  | -2.256610 |
| H  | -0.981270 | 2.936927  | -3.574367 |
| C  | 3.541140  | 0.255101  | 0.406446  |
| H  | 3.238270  | -0.254293 | -0.521579 |
| C  | 3.569791  | -0.776710 | 1.510104  |
| C  | 3.338648  | -0.440898 | 2.848798  |
| C  | 3.833792  | -2.114224 | 1.194831  |
| C  | 3.358980  | -1.418274 | 3.843111  |
| H  | 3.114557  | 0.593821  | 3.117691  |
| C  | 3.857616  | -3.094769 | 2.184782  |
| H  | 4.001163  | -2.392857 | 0.151635  |
| C  | 3.616254  | -2.750116 | 3.514915  |
| H  | 3.167032  | -1.139253 | 4.881685  |
| H  | 4.052018  | -4.135263 | 1.915236  |
| H  | 3.623372  | -3.516908 | 4.292376  |
| C  | 4.920609  | 0.898773  | 0.075156  |
| H  | 5.615125  | 0.019787  | -0.011122 |

|   |           |           |           |
|---|-----------|-----------|-----------|
| H | 5.252989  | 1.400160  | 1.029742  |
| O | 4.871332  | 1.700685  | -0.997615 |
| C | -1.825621 | -1.113976 | -1.224459 |
| H | -2.112915 | -0.072661 | -1.093273 |
| C | -2.736375 | -2.126181 | -0.917369 |
| H | -2.504266 | -3.121690 | -1.302082 |
| C | -4.180716 | -1.862138 | -0.728250 |
| C | -5.091188 | -2.927133 | -0.811338 |
| C | -4.686171 | -0.577836 | -0.471120 |
| C | -6.457825 | -2.720791 | -0.638977 |
| H | -4.716894 | -3.934837 | -1.011349 |
| C | -6.052175 | -0.370517 | -0.297835 |
| H | -4.007551 | 0.273745  | -0.389597 |
| C | -6.945620 | -1.439678 | -0.379347 |
| H | -7.147072 | -3.565407 | -0.707643 |
| H | -6.421400 | 0.637572  | -0.095148 |
| H | -8.016271 | -1.274778 | -0.241455 |
| C | -3.571403 | 0.223601  | 2.775210  |
| H | -2.873392 | -0.563606 | 3.091738  |
| H | -4.079472 | 0.612349  | 3.670806  |
| H | -4.340469 | -0.236372 | 2.136249  |
| C | -3.621699 | 4.751481  | 0.526618  |
| H | -4.614503 | 4.821204  | 0.991853  |
| H | -3.067914 | 5.673798  | 0.755415  |
| H | -3.766496 | 4.721037  | -0.565435 |
| H | -0.962707 | 4.269764  | 0.326130  |
| H | -0.924754 | 0.375016  | 2.167759  |
| C | 0.058354  | -2.071084 | 1.498789  |
| H | 0.887162  | -2.110107 | 2.209329  |
| C | -1.081011 | -2.617436 | 1.438593  |
| C | -2.349736 | -2.995465 | 1.131882  |
| H | -2.536143 | -4.018874 | 0.794614  |
| H | -3.176879 | -2.515024 | 1.662542  |

83

Figure\_S15-3\_PA-9d(Na)-ts(1,6major)\_03 / electronic energy: -3681.01674622 a.u. / lowest freq: -439.73 cm-1

|    |           |           |           |
|----|-----------|-----------|-----------|
| C  | 2.808814  | -2.155459 | 0.867278  |
| H  | 2.553608  | -3.125374 | 1.299515  |
| C  | 0.645853  | -1.348172 | 1.640382  |
| H  | 0.393753  | -2.400391 | 1.793550  |
| C  | 1.945842  | -1.099536 | 1.173681  |
| H  | 2.262952  | -0.072111 | 1.004400  |
| C  | -0.363994 | -0.426156 | 2.099330  |
| C  | -0.162220 | 1.013225  | 2.308185  |
| O  | -1.033668 | 1.832224  | 2.560143  |
| C  | -1.631585 | -0.991440 | 2.581687  |
| O  | -2.499734 | -0.409023 | 3.211347  |
| O  | -1.789292 | -2.281866 | 2.248390  |
| C  | 4.258701  | -1.953309 | 0.639065  |
| C  | 4.813223  | -0.692756 | 0.368262  |
| C  | 6.182994  | -0.544500 | 0.165599  |
| C  | 7.031058  | -1.650951 | 0.229364  |
| C  | 6.494394  | -2.909912 | 0.500960  |
| C  | 5.124360  | -3.056782 | 0.703459  |
| C  | 2.317169  | -3.075692 | -1.112372 |
| H  | 2.452588  | -4.097230 | -0.745805 |
| H  | 3.155391  | -2.676195 | -1.691208 |
| C  | 1.061610  | -2.647178 | -1.414693 |
| C  | -0.056218 | -2.059963 | -1.477192 |
| H  | -0.900188 | -2.091476 | -2.169400 |
| Cu | -0.393334 | -0.642863 | -0.068642 |
| C  | -1.326599 | 0.991489  | -0.706060 |
| N  | -2.640136 | 1.152228  | -0.658671 |
| N  | -0.765752 | 2.169386  | -1.059994 |
| C  | -3.557079 | 0.067641  | -0.323259 |
| C  | -3.070794 | 2.486793  | -1.094005 |
| H  | -3.827865 | 2.866419  | -0.396578 |
| C  | -1.751946 | 3.256868  | -1.064717 |
| H  | -1.610896 | 3.915419  | -1.931889 |
| C  | 0.614888  | 2.378644  | -1.247517 |
| C  | 1.412893  | 1.354546  | -1.764070 |
| C  | 1.189075  | 3.617264  | -0.941495 |
| C  | 2.786349  | 1.540429  | -1.936004 |
| C  | 2.562839  | 3.818881  | -1.095447 |
| C  | 3.351328  | 2.768930  | -1.580853 |
| H  | 4.427231  | 2.921401  | -1.706843 |
| Na | -3.340514 | 1.671157  | 2.667336  |
| H  | -1.653168 | 3.859455  | -0.146211 |
| H  | -3.500011 | 2.436997  | -2.108564 |
| O  | 1.111307  | 1.396635  | 2.182488  |
| C  | -2.978581 | -2.918544 | 2.686524  |
| H  | -3.007629 | -2.986180 | 3.783334  |
| H  | -2.963425 | -3.921940 | 2.248014  |
| H  | -3.866926 | -2.368158 | 2.344847  |
| C  | 1.400361  | 2.771817  | 2.375827  |
| H  | 0.749976  | 3.401241  | 1.755884  |
| H  | 2.445213  | 2.907679  | 2.075769  |
| H  | 1.270055  | 3.046968  | 3.432298  |
| H  | -3.155275 | -0.415260 | 0.581129  |
| C  | -3.626891 | -0.978321 | -1.412178 |

|   |           |           |           |
|---|-----------|-----------|-----------|
| C | -3.404414 | -0.673511 | -2.759506 |
| C | -3.922618 | -2.303115 | -1.070013 |
| C | -3.465417 | -1.667464 | -3.736230 |
| H | -3.154690 | 0.348372  | -3.052553 |
| C | -3.986347 | -3.299402 | -2.042085 |
| H | -4.085991 | -2.559109 | -0.020348 |
| C | -3.754297 | -2.985340 | -3.381585 |
| H | -3.279599 | -1.411384 | -4.781809 |
| H | -4.205530 | -4.329222 | -1.751157 |
| H | -3.793185 | -3.765008 | -4.145210 |
| C | -4.936438 | 0.651496  | 0.110936  |
| H | -5.566004 | -0.258700 | 0.304393  |
| H | -5.384928 | 1.084253  | -0.829631 |
| O | -4.834592 | 1.509566  | 1.134264  |
| H | 4.711641  | -4.047158 | 0.914239  |
| H | 4.171845  | 0.188692  | 0.307457  |
| H | 7.147585  | -3.783689 | 0.556683  |
| H | 6.592147  | 0.446757  | -0.043318 |
| H | 8.104791  | -1.531377 | 0.070245  |
| C | 3.185094  | 5.150087  | -0.762421 |
| H | 2.536661  | 5.748687  | -0.107567 |
| H | 4.156168  | 5.021194  | -0.262820 |
| H | 3.364994  | 5.735118  | -1.678574 |
| C | 3.612863  | 0.443390  | -2.553017 |
| H | 3.443854  | 0.399540  | -3.640750 |
| H | 4.686900  | 0.597523  | -2.383320 |
| H | 3.337647  | -0.536131 | -2.138397 |
| H | 0.956625  | 0.405791  | -2.051294 |
| H | 0.569449  | 4.429308  | -0.555900 |

83

Figure\_S15-3\_PA-9d(Na)-ts(1,6major)\_04 / electronic energy: -3681.01671223 a.u. / lowest freq: -455.50 cm-1

|    |           |           |           |
|----|-----------|-----------|-----------|
| C  | -3.591662 | 1.934032  | -1.025909 |
| H  | -4.376220 | 2.203010  | -0.309573 |
| C  | -2.471326 | 2.965707  | -1.102990 |
| H  | -2.497852 | 3.568894  | -2.020242 |
| C  | -1.557520 | 0.869179  | -0.629234 |
| C  | 0.021205  | 2.662842  | -1.203677 |
| C  | 0.219318  | 4.042421  | -1.096995 |
| C  | 1.117960  | 1.831766  | -1.469917 |
| C  | 1.502698  | 4.592197  | -1.216003 |
| C  | 2.400648  | 2.360276  | -1.589527 |
| C  | 2.583606  | 3.742749  | -1.451729 |
| H  | 3.588454  | 4.164297  | -1.545338 |
| Cu | -0.271453 | -0.562506 | -0.101471 |
| N  | -2.873432 | 0.751771  | -0.542232 |
| N  | -1.270897 | 2.123061  | -1.059204 |
| C  | 1.020512  | -1.310189 | 1.428926  |
| C  | 0.047247  | -0.414400 | 2.005520  |
| H  | -2.485320 | 3.648118  | -0.236225 |
| H  | -4.034998 | 1.732332  | -2.014128 |
| H  | 0.748748  | -2.365412 | 1.517933  |
| C  | 0.239788  | 1.030608  | 2.203814  |
| C  | -1.146136 | -1.009299 | 2.624387  |
| O  | 1.499126  | 1.426055  | 2.015251  |
| O  | -0.633256 | 1.838459  | 2.484011  |
| O  | -1.932762 | -0.449495 | 3.367913  |
| O  | -1.331915 | -2.296913 | 2.286940  |
| C  | -2.470000 | -2.945038 | 2.837357  |
| H  | -2.414768 | -2.969106 | 3.934430  |
| H  | -2.459567 | -3.964394 | 2.436862  |
| H  | -3.394525 | -2.430530 | 2.537343  |
| C  | 1.761896  | 2.820228  | 2.062553  |
| H  | 1.170001  | 3.351754  | 1.304949  |
| H  | 2.829548  | 2.933611  | 1.845832  |
| H  | 1.533380  | 3.227528  | 3.057124  |
| C  | -3.552678 | -0.443528 | -0.040163 |
| H  | -2.882572 | -0.856621 | 0.726289  |
| C  | -3.733709 | -1.496472 | -1.108699 |
| C  | -3.099113 | -2.736993 | -0.976228 |
| C  | -4.529471 | -1.270830 | -2.240037 |
| C  | -3.248807 | -3.727778 | -1.945998 |
| H  | -2.458201 | -2.917385 | -0.108844 |
| C  | -4.678336 | -2.257344 | -3.214059 |
| H  | -5.040656 | -0.313721 | -2.366277 |
| C  | -4.038923 | -3.489618 | -3.070083 |
| H  | -2.739046 | -4.686291 | -1.825590 |
| H  | -5.298667 | -2.062606 | -4.091983 |
| H  | -4.154778 | -4.261261 | -3.834497 |
| C  | -4.859395 | -0.032339 | 0.701798  |
| H  | -5.267946 | -1.008640 | 1.082855  |
| H  | -5.591323 | 0.253100  | -0.107871 |
| O  | -4.660518 | 0.913328  | 1.627665  |
| C  | 2.317445  | -1.068657 | 0.951442  |
| H  | 2.681853  | -0.045012 | 0.891633  |
| C  | 3.096381  | -2.123411 | 0.468973  |
| H  | 2.751193  | -3.127009 | 0.731857  |
| C  | 4.564465  | -2.024083 | 0.277565  |
| C  | 5.310412  | -3.196739 | 0.079852  |
| C  | 5.251319  | -0.800945 | 0.295254  |

|    |           |           |           |
|----|-----------|-----------|-----------|
| C  | 6.689494  | -3.150786 | -0.109368 |
| H  | 4.796722  | -4.161965 | 0.072949  |
| C  | 6.630111  | -0.752175 | 0.102635  |
| H  | 4.709322  | 0.129623  | 0.467606  |
| C  | 7.356329  | -1.925484 | -0.104175 |
| H  | 7.245738  | -4.078505 | -0.260867 |
| H  | 7.142277  | 0.212524  | 0.119965  |
| H  | 8.437266  | -1.884674 | -0.254365 |
| C  | 3.558706  | 1.457342  | -1.922602 |
| H  | 3.355121  | 0.418399  | -1.627433 |
| H  | 3.752526  | 1.460944  | -3.007274 |
| H  | 4.482842  | 1.785800  | -1.425836 |
| C  | 1.697039  | 6.077182  | -1.052718 |
| H  | 2.724810  | 6.377713  | -1.297767 |
| H  | 1.009602  | 6.643240  | -1.698906 |
| H  | 1.494692  | 6.384677  | -0.014523 |
| H  | -0.620462 | 4.710262  | -0.899291 |
| H  | 0.968599  | 0.761655  | -1.620692 |
| C  | 0.124239  | -1.713730 | -1.727074 |
| H  | -0.724219 | -1.701444 | -2.411874 |
| C  | 1.288287  | -2.204155 | -1.800736 |
| C  | 2.587385  | -2.572051 | -1.627358 |
| H  | 2.820632  | -3.633874 | -1.508898 |
| H  | 3.358138  | -1.980658 | -2.132381 |
| Na | -2.932710 | 1.536012  | 2.718431  |

83

Figure\_S15-3\_PA-9d(Na)-ts(1,6major)\_05 / electronic energy: -3681.01685875 a.u. / lowest freq: -455.87 cm-1

|    |           |           |           |
|----|-----------|-----------|-----------|
| C  | -3.544314 | 1.987791  | -0.997868 |
| H  | -4.302445 | 2.257405  | -0.253080 |
| C  | -2.404127 | 2.999453  | -1.091434 |
| H  | -2.423494 | 3.591482  | -2.016339 |
| C  | -1.520200 | 0.887070  | -0.627346 |
| C  | 0.085462  | 2.648442  | -1.206686 |
| C  | 0.316633  | 4.024064  | -1.123616 |
| C  | 1.158122  | 1.785962  | -1.472418 |
| C  | 1.611814  | 4.540394  | -1.264511 |
| C  | 2.451661  | 2.281206  | -1.614207 |
| C  | 2.668769  | 3.661021  | -1.498599 |
| H  | 3.682428  | 4.056685  | -1.608784 |
| Cu | -0.285931 | -0.566678 | -0.053637 |
| N  | -2.837904 | 0.782072  | -0.552886 |
| N  | -1.216041 | 2.139317  | -1.041840 |
| C  | 0.983556  | -1.281003 | 1.499720  |
| C  | 0.031332  | -0.347394 | 2.049079  |
| Na | -2.953243 | 1.608695  | 2.661366  |
| H  | -2.402741 | 3.694084  | -0.234833 |
| H  | -4.030499 | 1.812310  | -1.970928 |
| H  | 0.694261  | -2.327538 | 1.628440  |
| C  | 0.246729  | 1.099521  | 2.204251  |
| C  | -1.174748 | -0.897139 | 2.684780  |
| O  | 1.518158  | 1.465251  | 2.039021  |
| O  | -0.621238 | 1.929544  | 2.431290  |
| O  | -1.922815 | -0.307451 | 3.445577  |
| O  | -1.419651 | -2.171541 | 2.340944  |
| C  | -2.585516 | -2.769008 | 2.888588  |
| H  | -2.512598 | -2.842513 | 3.982574  |
| H  | -2.647764 | -3.769358 | 2.447205  |
| H  | -3.480025 | -2.182880 | 2.630114  |
| C  | 1.807930  | 2.854730  | 2.055244  |
| H  | 1.247255  | 3.376575  | 1.267928  |
| H  | 2.883047  | 2.941398  | 1.864526  |
| H  | 1.561559  | 3.293571  | 3.031972  |
| C  | -3.524998 | -0.424180 | -0.113142 |
| H  | -2.880102 | -0.875351 | 0.656304  |
| C  | -3.699776 | -1.443248 | -1.217182 |
| C  | -4.032771 | -2.760254 | -0.872696 |
| C  | -3.534477 | -1.134269 | -2.571613 |
| C  | -4.199144 | -3.738196 | -1.850648 |
| H  | -4.148905 | -3.024840 | 0.181499  |
| C  | -3.698780 | -2.111765 | -3.554339 |
| H  | -3.249752 | -0.123545 | -2.870293 |
| C  | -4.032661 | -3.417555 | -3.198734 |
| H  | -4.449801 | -4.760514 | -1.558297 |
| H  | -3.557221 | -1.850199 | -4.605471 |
| H  | -4.155087 | -4.184117 | -3.966986 |
| C  | -4.848048 | -0.025362 | 0.617579  |
| H  | -5.285470 | -1.004007 | 0.953244  |
| H  | -5.549112 | 0.303543  | -0.203409 |
| O  | -4.650738 | 0.876275  | 1.585002  |
| C  | 2.279943  | -1.078139 | 1.000549  |
| H  | 2.663391  | -0.063700 | 0.904671  |
| C  | 3.033274  | -2.163179 | 0.545910  |
| H  | 2.667240  | -3.149841 | 0.842429  |
| C  | 4.500839  | -2.105430 | 0.336975  |
| C  | 5.215130  | -3.301929 | 0.166529  |
| C  | 5.218614  | -0.900299 | 0.312790  |
| C  | 6.592639  | -3.296747 | -0.038230 |
| H  | 4.677927  | -4.253952 | 0.193970  |
| C  | 6.596068  | -0.892324 | 0.104367  |



|   |           |           |           |
|---|-----------|-----------|-----------|
| H | 4.701995  | 0.047984  | 0.464976  |
| C | 7.290145  | -2.089120 | -0.076107 |
| H | 7.123780  | -4.242237 | -0.168461 |
| H | 7.132287  | 0.059280  | 0.088192  |
| H | 8.370047  | -2.080656 | -0.238686 |
| C | 3.583721  | 1.346157  | -1.947518 |
| H | 3.762243  | 1.326860  | -3.034640 |
| H | 4.522042  | 1.661262  | -1.469101 |
| H | 3.360498  | 0.317348  | -1.631696 |
| C | 1.844472  | 6.022272  | -1.125417 |
| H | 2.878141  | 6.292551  | -1.380609 |
| H | 1.167801  | 6.595565  | -1.776607 |
| H | 1.655850  | 6.350956  | -0.091147 |
| H | -0.504599 | 4.714732  | -0.926303 |
| H | 0.978698  | 0.717605  | -1.605561 |
| C | 0.031340  | -1.818947 | -1.618019 |
| H | -0.843703 | -1.833823 | -2.270119 |
| C | 1.193864  | -2.310751 | -1.698485 |
| C | 2.495826  | -2.674244 | -1.536184 |
| H | 2.729106  | -3.730884 | -1.379126 |
| H | 3.259351  | -2.105175 | -2.076885 |

83

Figure\_S15-3\_PA-9d(Na)-ts(1,6major)\_06 / electronic energy: -3681.01677377 a.u. / lowest freq: -425.81 cm-1

|    |           |           |           |
|----|-----------|-----------|-----------|
| C  | 2.738942  | -2.118966 | 0.923536  |
| H  | 2.507597  | -3.112529 | 1.313677  |
| C  | 0.523057  | -1.406407 | 1.650699  |
| H  | 0.296559  | -2.467977 | 1.774669  |
| C  | 1.827683  | -1.105771 | 1.225910  |
| H  | 2.113890  | -0.064860 | 1.089111  |
| C  | -0.523012 | -0.519574 | 2.099049  |
| C  | -0.357444 | 0.915968  | 2.357490  |
| O  | -1.247517 | 1.708590  | 2.627333  |
| C  | -1.795584 | -1.124733 | 2.516028  |
| O  | -2.725428 | -0.563523 | 3.073998  |
| O  | -1.879614 | -2.428300 | 2.211112  |
| C  | 4.183163  | -1.855284 | 0.732650  |
| C  | 4.688680  | -0.571287 | 0.474151  |
| C  | 6.054592  | -0.364374 | 0.299533  |
| C  | 6.947899  | -1.433619 | 0.381030  |
| C  | 6.460080  | -2.714431 | 0.642167  |
| C  | 5.093579  | -2.920347 | 0.815959  |
| C  | 2.350722  | -2.999543 | -1.120349 |
| H  | 2.537368  | -4.021140 | -0.777770 |
| H  | 3.177452  | -2.521943 | -1.654142 |
| C  | 1.081712  | -2.623509 | -1.428507 |
| C  | -0.057909 | -2.077991 | -1.491133 |
| H  | -0.886966 | -2.120992 | -2.201156 |
| Cu | -0.442908 | -0.673965 | -0.086100 |
| C  | -1.249373 | 1.035194  | -0.698157 |
| N  | -2.548012 | 1.289651  | -0.665578 |
| N  | -0.596241 | 2.183032  | -0.984310 |
| C  | -3.542934 | 0.251906  | -0.405669 |
| C  | -2.869705 | 2.670482  | -1.047014 |
| H  | -3.620953 | 3.070566  | -0.355106 |
| C  | -1.499517 | 3.340174  | -0.948886 |
| H  | -1.289667 | 4.031154  | -1.775926 |
| C  | 0.794148  | 2.284667  | -1.191702 |
| C  | 1.475668  | 1.239506  | -1.831028 |
| C  | 1.489496  | 3.429188  | -0.805775 |
| C  | 2.848222  | 1.314643  | -2.049798 |
| C  | 2.875132  | 3.517720  | -1.001222 |
| C  | 3.540104  | 2.455027  | -1.613937 |
| H  | 4.619298  | 2.522786  | -1.780258 |
| Na | -3.539101 | 1.571729  | 2.677577  |
| H  | -1.378983 | 3.884528  | 0.002859  |
| H  | -3.270246 | 2.698872  | -2.074203 |
| O  | 0.909072  | 1.333802  | 2.264789  |
| C  | -3.062762 | -3.106675 | 2.599793  |
| H  | -3.152375 | -3.144469 | 3.694810  |
| H  | -2.976896 | -4.120248 | 2.194084  |
| H  | -3.954048 | -2.609389 | 2.191945  |
| C  | 1.156772  | 2.708311  | 2.507092  |
| H  | 0.506977  | 3.339905  | 1.888086  |
| H  | 2.206449  | 2.878884  | 2.244188  |
| H  | 0.987032  | 2.950315  | 3.566059  |
| H  | -3.239100 | -0.253360 | 0.524292  |
| C  | -3.571981 | -0.784709 | -1.504800 |
| C  | -3.834252 | -2.121130 | -1.183498 |
| C  | -3.342715 | -0.454375 | -2.845189 |
| C  | -3.858277 | -3.105909 | -2.169254 |
| H  | -4.000143 | -2.395380 | -0.138907 |
| C  | -3.363197 | -1.435991 | -3.835292 |
| H  | -3.119951 | 0.579405  | -3.118756 |
| C  | -3.618779 | -2.766685 | -3.501119 |
| H  | -4.051382 | -4.145426 | -1.895044 |
| H  | -3.172698 | -1.161258 | -4.875274 |
| H  | -3.626049 | -3.536739 | -4.275348 |
| C  | -4.922352 | 0.896482  | -0.075986 |
| H  | -5.616493 | 0.017636  | 0.014660  |

|   |           |           |           |
|---|-----------|-----------|-----------|
| H | -5.255709 | 1.393696  | -1.032421 |
| O | -4.872456 | 1.703009  | 0.993306  |
| H | 4.719336  | -3.927815 | 1.017260  |
| H | 4.010325  | 0.280512  | 0.393027  |
| H | 7.149231  | -3.559113 | 0.710973  |
| H | 6.423864  | 0.643536  | 0.096075  |
| H | 8.018467  | -1.269010 | 0.242147  |
| C | 3.616284  | 4.749167  | -0.548970 |
| H | 3.476491  | 4.918583  | 0.529924  |
| H | 4.694050  | 4.664411  | -0.742973 |
| H | 3.244935  | 5.646291  | -1.067815 |
| C | 3.568347  | 0.208613  | -2.775655 |
| H | 4.079885  | 0.594904  | -3.670358 |
| H | 4.334710  | -0.251337 | -2.133410 |
| H | 2.869918  | -0.577898 | -3.092962 |
| H | 0.919321  | 0.368335  | -2.178545 |
| H | 0.963334  | 4.260699  | -0.331868 |

83

Figure\_S15-3\_PA-9d(Na)-ts(1,6major)\_07 / electronic energy: -3681.01671535 a.u. / lowest freq: -426.21 cm-1

|    |           |           |           |
|----|-----------|-----------|-----------|
| C  | 2.740000  | -2.119828 | 0.920462  |
| H  | 2.508209  | -3.114044 | 1.308662  |
| C  | 0.524323  | -1.408985 | 1.648876  |
| H  | 0.298245  | -2.470926 | 1.770411  |
| C  | 1.828912  | -1.107033 | 1.224970  |
| H  | 2.114930  | -0.065749 | 1.090290  |
| C  | -0.522364 | -0.523750 | 2.098955  |
| C  | -0.357669 | 0.911138  | 2.361532  |
| O  | -1.248367 | 1.702231  | 2.633862  |
| C  | -1.794928 | -1.130772 | 2.513300  |
| O  | -2.725113 | -0.572007 | 3.073135  |
| O  | -1.878596 | -2.433152 | 2.203121  |
| C  | 4.184426  | -1.856712 | 0.730277  |
| C  | 4.691342  | -0.572242 | 0.476964  |
| C  | 6.057444  | -0.366270 | 0.302495  |
| C  | 6.949502  | -1.436904 | 0.379018  |
| C  | 6.460294  | -2.718205 | 0.635146  |
| C  | 5.093662  | -2.923173 | 0.808815  |
| C  | 2.351319  | -2.996488 | -1.124643 |
| H  | 2.537734  | -4.018813 | -0.784113 |
| H  | 3.178104  | -2.518267 | -1.657779 |
| C  | 1.082349  | -2.619843 | -1.432416 |
| C  | -0.057264 | -2.074291 | -1.494357 |
| H  | -0.886304 | -2.115847 | -2.204473 |
| Cu | -0.442374 | -0.673421 | -0.086184 |
| C  | -1.250265 | 1.036261  | -0.694639 |
| N  | -2.549014 | 1.290057  | -0.661645 |
| N  | -0.597563 | 2.184957  | -0.978243 |
| C  | -3.543513 | 0.251131  | -0.404941 |
| C  | -2.871335 | 2.671576  | -1.040012 |
| H  | -3.622564 | 3.069873  | -0.347041 |
| C  | -1.501378 | 3.341666  | -0.940822 |
| H  | -1.291946 | 4.034147  | -1.766711 |
| C  | 0.792517  | 2.287254  | -1.187206 |
| C  | 1.473908  | 1.244447  | -1.828490 |
| C  | 1.488287  | 3.431159  | -0.796699 |
| C  | 2.847785  | 1.319361  | -2.044425 |
| C  | 2.872982  | 3.520493  | -0.991506 |
| C  | 3.539067  | 2.457316  | -1.604443 |
| H  | 4.619101  | 2.523838  | -1.766393 |
| Na | -3.539702 | 1.563884  | 2.682000  |
| H  | -1.381004 | 3.884488  | 0.011806  |
| H  | -3.272247 | 2.702088  | -2.066994 |
| O  | 0.908471  | 1.330274  | 2.269819  |
| C  | -3.061836 | -3.113291 | 2.588369  |
| H  | -3.151279 | -3.156991 | 3.683189  |
| H  | -2.976296 | -4.124698 | 2.177209  |
| H  | -3.953040 | -2.613558 | 2.183350  |
| C  | 1.154848  | 2.704295  | 2.516785  |
| H  | 0.504577  | 3.337164  | 1.899553  |
| H  | 2.204348  | 2.877050  | 2.254679  |
| H  | 0.984265  | 2.942585  | 3.576464  |
| H  | -3.239425 | -0.256948 | 0.523413  |
| C  | -3.572186 | -0.781987 | -1.507400 |
| C  | -3.341756 | -0.447564 | -2.846574 |
| C  | -3.835208 | -2.119312 | -1.190521 |
| C  | -3.361773 | -1.426071 | -3.839768 |
| H  | -3.118449 | 0.586985  | -3.116756 |
| C  | -3.858727 | -3.100999 | -2.179361 |
| H  | -4.002088 | -2.396842 | -0.146957 |
| C  | -3.618042 | -2.757711 | -3.509971 |
| H  | -3.170389 | -1.148097 | -4.878727 |
| H  | -4.052389 | -4.141309 | -1.908572 |
| H  | -3.624933 | -3.525375 | -4.286574 |
| C  | -4.923144 | 0.894191  | -0.073188 |
| H  | -5.616899 | 0.014787  | 0.015048  |
| H  | -5.256868 | 1.393969  | -1.028157 |
| O  | -4.873416 | 1.697682  | 0.998368  |
| H  | 4.718301  | -3.931015 | 1.006130  |
| H  | 4.014025  | 0.280760  | 0.399870  |

|   |          |           |           |
|---|----------|-----------|-----------|
| H | 7.148453 | -3.564003 | 0.700065  |
| H | 6.427899 | 0.642004  | 0.103042  |
| H | 8.020186 | -1.272990 | 0.240203  |
| C | 3.615976 | 4.760851  | -0.567365 |
| H | 3.210795 | 5.170630  | 0.369379  |
| H | 4.686017 | 4.558635  | -0.421106 |
| H | 3.528351 | 5.548187  | -1.333320 |
| C | 3.568392 | 0.213159  | -2.769667 |
| H | 4.083893 | 0.599945  | -3.661849 |
| H | 4.331458 | -0.249495 | -2.125469 |
| H | 2.869552 | -0.571402 | -3.090871 |
| H | 0.918293 | 0.373235  | -2.177077 |
| H | 0.961482 | 4.259939  | -0.319022 |

83

Figure\_S15-3\_PA-9d(Na)-ts(1,6major)\_08 / electronic energy: -3681.01672564 a.u. / lowest freq: -455.71 cm-1

|    |           |           |           |
|----|-----------|-----------|-----------|
| C  | -3.634131 | 1.861274  | -0.997707 |
| H  | -4.406766 | 2.110048  | -0.260734 |
| C  | -2.536784 | 2.917467  | -1.095691 |
| H  | -2.587252 | 3.511367  | -2.018038 |
| C  | -1.570862 | 0.842341  | -0.628888 |
| C  | -0.038144 | 2.669605  | -1.216141 |
| C  | 0.129117  | 4.055431  | -1.131411 |
| C  | 1.076058  | 1.860536  | -1.476275 |
| C  | 1.398008  | 4.632600  | -1.268380 |
| C  | 2.345844  | 2.416739  | -1.611825 |
| C  | 2.497323  | 3.804737  | -1.499500 |
| H  | 3.491302  | 4.248086  | -1.608148 |
| Cu | -0.252796 | -0.554912 | -0.091780 |
| N  | -2.882440 | 0.691167  | -0.537192 |
| N  | -1.316733 | 2.103180  | -1.058195 |
| C  | 1.054192  | -1.271833 | 1.436846  |
| C  | 0.091214  | -0.361743 | 2.006813  |
| H  | -2.556424 | 3.607869  | -0.235546 |
| H  | -4.097961 | 1.656935  | -1.975675 |
| H  | 0.776063  | -2.324075 | 1.543871  |
| C  | 0.284645  | 1.087287  | 2.174554  |
| C  | -1.089624 | -0.939720 | 2.664721  |
| O  | 1.543596  | 1.480169  | 1.980413  |
| O  | -0.591808 | 1.898672  | 2.433143  |
| O  | -1.828284 | -0.370689 | 3.449149  |
| O  | -1.321732 | -2.216400 | 2.315889  |
| C  | -2.469289 | -2.833524 | 2.883476  |
| H  | -2.378375 | -2.899594 | 3.976430  |
| H  | -2.519092 | -3.837292 | 2.448156  |
| H  | -3.378171 | -2.266527 | 2.632756  |
| C  | 1.802779  | 2.875880  | 1.999540  |
| H  | 1.202269  | 3.391704  | 1.237998  |
| H  | 2.868340  | 2.988343  | 1.772449  |
| H  | 1.581090  | 3.300129  | 2.988613  |
| C  | -3.525447 | -0.520732 | -0.028800 |
| H  | -2.821254 | -0.931160 | 0.707442  |
| C  | -3.728148 | -1.565639 | -1.101234 |
| C  | -4.558191 | -1.338437 | -2.207357 |
| C  | -3.084975 | -2.804222 | -0.993034 |
| C  | -4.731066 | -2.320984 | -3.181542 |
| H  | -5.078279 | -0.383713 | -2.313534 |
| C  | -3.258496 | -3.790971 | -1.963019 |
| H  | -2.420336 | -2.986605 | -0.143993 |
| C  | -4.082180 | -3.550852 | -3.062442 |
| H  | -5.378936 | -2.125181 | -4.039123 |
| H  | -2.742230 | -4.748224 | -1.861822 |
| H  | -4.217254 | -4.319475 | -3.826776 |
| C  | -4.812034 | -0.141095 | 0.761717  |
| H  | -5.192246 | -1.128522 | 1.144030  |
| H  | -5.575811 | 0.141989  | -0.018996 |
| O  | -4.594959 | 0.795541  | 1.691608  |
| C  | 2.351029  | -1.046302 | 0.949836  |
| H  | 2.725907  | -0.026763 | 0.881101  |
| C  | 3.115248  | -2.113262 | 0.470909  |
| H  | 2.758684  | -3.110236 | 0.744116  |
| C  | 4.583202  | -2.035923 | 0.270620  |
| C  | 5.315946  | -3.223727 | 0.121280  |
| C  | 5.281568  | -0.819964 | 0.227579  |
| C  | 6.694584  | -3.200348 | -0.076223 |
| H  | 4.792457  | -4.183009 | 0.159842  |
| C  | 6.659705  | -0.793993 | 0.026359  |
| H  | 4.748545  | 0.122676  | 0.356723  |
| C  | 7.373425  | -1.982930 | -0.129459 |
| H  | 7.240837  | -4.139444 | -0.189149 |
| H  | 7.181154  | 0.165373  | -0.004997 |
| H  | 8.453915  | -1.960052 | -0.286593 |
| C  | 0.134632  | -1.715161 | -1.712579 |
| H  | -0.715330 | -1.707356 | -2.395469 |
| C  | 1.299922  | -2.202497 | -1.788865 |
| C  | 2.600872  | -2.565281 | -1.619107 |
| H  | 3.367204  | -1.970900 | -2.127453 |
| H  | 2.839536  | -3.625869 | -1.500092 |
| Na | -2.891492 | 1.550947  | 2.724233  |
| H  | -0.725325 | 4.706163  | -0.939920 |

|   |          |          |           |
|---|----------|----------|-----------|
| H | 0.950866 | 0.785140 | -1.611273 |
| C | 3.524095 | 1.535227 | -1.931976 |
| H | 3.744171 | 1.559323 | -3.011289 |
| H | 4.431118 | 1.870336 | -1.408283 |
| H | 3.329112 | 0.488832 | -1.657516 |
| C | 1.565951 | 6.122031 | -1.115944 |
| H | 1.607897 | 6.399051 | -0.050040 |
| H | 2.494790 | 6.473147 | -1.586179 |
| H | 0.723077 | 6.668636 | -1.562838 |

83

Figure\_S15-3\_PA-9d(Na)-ts(1,6major)\_09 / electronic energy: -3681.01602735 a.u. / lowest freq: -466.70 cm-1

|    |           |           |           |
|----|-----------|-----------|-----------|
| C  | -3.673078 | 1.708482  | -0.921980 |
| H  | -4.426369 | 1.951325  | -0.162937 |
| C  | -2.609933 | 2.796285  | -1.071679 |
| H  | -2.691155 | 3.350303  | -2.016716 |
| C  | -1.574700 | 0.758105  | -0.579868 |
| C  | -0.109986 | 2.613887  | -1.252000 |
| C  | 0.021837  | 4.005815  | -1.241995 |
| C  | 1.015005  | 1.822478  | -1.524919 |
| C  | 1.264764  | 4.609173  | -1.474786 |
| C  | 2.259847  | 2.404568  | -1.748777 |
| C  | 2.374751  | 3.800781  | -1.720129 |
| H  | 3.349035  | 4.264176  | -1.899899 |
| Cu | -0.203872 | -0.569599 | -0.011417 |
| N  | -2.879067 | 0.557517  | -0.491480 |
| N  | -1.365196 | 2.023632  | -1.020193 |
| C  | 1.183956  | -1.194919 | 1.475103  |
| C  | 0.284013  | -0.218466 | 2.032175  |
| H  | -2.643147 | 3.521007  | -0.241490 |
| H  | -4.176992 | 1.490174  | -1.876095 |
| H  | 0.882204  | -2.229737 | 1.666382  |
| C  | 0.520608  | 1.230855  | 2.104855  |
| C  | -0.847101 | -0.712228 | 2.838075  |
| O  | 1.773059  | 1.589223  | 1.823659  |
| O  | -0.330648 | 2.070195  | 2.361468  |
| O  | -1.377112 | -0.111266 | 3.754463  |
| O  | -1.272550 | -1.928267 | 2.471553  |
| C  | -2.445984 | -2.404176 | 3.126368  |
| H  | -2.243041 | -2.612404 | 4.186398  |
| H  | -2.723712 | -3.328688 | 2.608473  |
| H  | -3.240898 | -1.647800 | 3.041441  |
| C  | 2.052670  | 2.979950  | 1.763928  |
| H  | 1.399558  | 3.476027  | 1.033610  |
| H  | 3.098001  | 3.065674  | 1.448158  |
| H  | 1.916665  | 3.445504  | 2.750190  |
| C  | -3.480835 | -0.673059 | 0.018712  |
| H  | -2.666970 | -1.176879 | 0.558190  |
| C  | -3.950435 | -1.596207 | -1.083868 |
| C  | -5.026455 | -1.268701 | -1.920761 |
| C  | -3.322142 | -2.834848 | -1.264946 |
| C  | -5.447416 | -2.146002 | -2.919855 |
| H  | -5.552954 | -0.320981 | -1.789547 |
| C  | -3.741950 | -3.716253 | -2.260794 |
| H  | -2.485121 | -3.107810 | -0.616043 |
| C  | -4.805522 | -3.372015 | -3.094967 |
| H  | -6.285851 | -1.870728 | -3.563932 |
| H  | -3.235114 | -4.675867 | -2.385601 |
| H  | -5.135992 | -4.059593 | -3.876673 |
| C  | -4.566833 | -0.335843 | 1.078819  |
| H  | -4.917811 | -1.346191 | 1.428536  |
| H  | -5.454823 | 0.060610  | 0.509440  |
| O  | -4.112203 | 0.477045  | 2.037850  |
| C  | 2.458966  | -1.039838 | 0.907862  |
| H  | 2.857686  | -0.037253 | 0.762521  |
| C  | 3.165244  | -2.154723 | 0.447673  |
| H  | 2.800441  | -3.122117 | 0.804639  |
| C  | 4.624344  | -2.130829 | 0.174862  |
| C  | 5.325760  | -3.343513 | 0.095248  |
| C  | 5.342734  | -0.939786 | -0.008679 |
| C  | 6.694330  | -3.369016 | -0.164652 |
| H  | 4.786794  | -4.283915 | 0.240115  |
| C  | 6.710454  | -0.962850 | -0.271461 |
| H  | 4.832286  | 0.021616  | 0.057521  |
| C  | 7.393678  | -2.176931 | -0.352874 |
| H  | 7.217089  | -4.326499 | -0.220037 |
| H  | 7.247298  | -0.021696 | -0.410644 |
| H  | 8.466422  | -2.193324 | -0.557036 |
| C  | 3.454177  | 1.542428  | -2.061934 |
| H  | 3.263556  | 0.487398  | -1.819512 |
| H  | 3.707014  | 1.599833  | -3.132503 |
| H  | 4.341629  | 1.873779  | -1.502355 |
| C  | 1.394273  | 6.108877  | -1.410838 |
| H  | 2.306669  | 6.456076  | -1.914797 |
| H  | 0.530892  | 6.606078  | -1.876289 |
| H  | 1.442360  | 6.449603  | -0.363906 |
| H  | -0.840860 | 4.642080  | -1.038935 |
| H  | 0.915325  | 0.738458  | -1.600810 |
| C  | 0.086142  | -1.809924 | -1.598059 |
| H  | -0.786279 | -1.810646 | -2.252102 |

|    |           |           |           |
|----|-----------|-----------|-----------|
| C  | 1.238759  | -2.322219 | -1.699088 |
| C  | 2.541845  | -2.697304 | -1.565054 |
| H  | 2.768881  | -3.757256 | -1.418348 |
| H  | 3.289366  | -2.140050 | -2.139242 |
| Na | -2.597185 | 1.679307  | 2.891124  |

83

Figure\_S15-3\_PA-9d(Na)-ts(1,6major)\_10 / electronic energy: -3681.01100626 a.u. / lowest freq: -418.22 cm-1

|    |           |           |           |
|----|-----------|-----------|-----------|
| C  | -2.619613 | -2.166296 | 1.436365  |
| H  | -2.438546 | -3.129773 | 1.915738  |
| C  | -0.527366 | -2.328297 | 0.156714  |
| H  | -0.147396 | -2.976247 | 0.950888  |
| C  | -1.836303 | -1.842700 | 0.325528  |
| H  | -2.236142 | -1.136598 | -0.403023 |
| C  | 0.342975  | -2.178209 | -0.986058 |
| C  | -0.101484 | -1.818821 | -2.339334 |
| O  | 0.619641  | -1.485473 | -3.265733 |
| C  | 1.718348  | -2.683064 | -0.871491 |
| O  | 2.519430  | -2.837659 | -1.778603 |
| O  | 2.061061  | -2.965852 | 0.395089  |
| C  | -3.995856 | -1.635457 | 1.550741  |
| C  | -4.282993 | -0.307246 | 1.198061  |
| C  | -5.577542 | 0.192561  | 1.298148  |
| C  | -6.612626 | -0.623782 | 1.759904  |
| C  | -6.336985 | -1.940963 | 2.126880  |
| C  | -5.038516 | -2.440883 | 2.028403  |
| C  | -1.779086 | -1.281555 | 3.346902  |
| H  | -1.687056 | -2.231522 | 3.881455  |
| H  | -2.665455 | -0.687031 | 3.583761  |
| C  | -0.650441 | -0.638644 | 2.954499  |
| C  | 0.306411  | -0.119323 | 2.311359  |
| H  | 1.161869  | 0.496618  | 2.592678  |
| Cu | 0.335815  | -0.438789 | 0.297746  |
| C  | 1.089159  | 1.230249  | -0.449275 |
| N  | 2.390581  | 1.479690  | -0.471777 |
| N  | 0.437016  | 2.332726  | -0.880006 |
| C  | 3.424335  | 0.539320  | -0.076125 |
| C  | 2.714891  | 2.776575  | -1.072965 |
| H  | 3.135299  | 2.592203  | -2.072878 |
| C  | 1.350406  | 3.463166  | -1.090750 |
| H  | 1.254149  | 4.197239  | -0.274283 |
| C  | -0.967735 | 2.482498  | -0.926917 |
| C  | -1.555429 | 3.661796  | -0.455993 |
| C  | -1.771094 | 1.473888  | -1.461980 |
| C  | -2.940428 | 3.830738  | -0.494083 |
| C  | -3.162511 | 1.621756  | -1.508904 |
| C  | -3.729287 | 2.800375  | -1.018443 |
| H  | -4.815126 | 2.927389  | -1.058801 |
| Na | 2.886905  | -1.130247 | -3.323368 |
| H  | 1.130641  | 3.970161  | -2.039781 |
| H  | 3.455774  | 3.321521  | -0.472835 |
| O  | -1.426500 | -1.897129 | -2.511391 |
| C  | 3.375125  | -3.453678 | 0.610747  |
| H  | 3.510753  | -4.438496 | 0.141716  |
| H  | 3.496296  | -3.532333 | 1.696213  |
| H  | 4.120243  | -2.760158 | 0.195921  |
| C  | -1.916706 | -1.612850 | -3.814168 |
| H  | -1.719687 | -0.565933 | -4.087516 |
| H  | -2.995606 | -1.794235 | -3.777503 |
| H  | -1.447765 | -2.270155 | -4.558653 |
| H  | 2.961555  | -0.459284 | -0.116778 |
| C  | 3.913052  | 0.779434  | 1.339125  |
| C  | 3.496135  | 1.870468  | 2.110629  |
| C  | 4.818867  | -0.124241 | 1.912902  |
| C  | 3.974858  | 2.059268  | 3.408363  |
| H  | 2.769113  | 2.577499  | 1.706127  |
| C  | 5.298890  | 0.060376  | 3.207478  |
| H  | 5.148516  | -0.994164 | 1.340895  |
| C  | 4.881272  | 1.157368  | 3.961971  |
| H  | 3.630656  | 2.917603  | 3.989968  |
| H  | 6.001625  | -0.660973 | 3.630970  |
| H  | 5.255743  | 1.303605  | 4.977438  |
| C  | 4.562693  | 0.540178  | -1.151533 |
| H  | 5.294601  | -0.228618 | -0.785330 |
| H  | 5.110584  | 1.514012  | -0.996817 |
| O  | 4.103355  | 0.344599  | -2.391137 |
| H  | -4.830621 | -3.474574 | 2.317180  |
| H  | -3.475960 | 0.349084  | 0.862443  |
| H  | -7.138467 | -2.586254 | 2.493788  |
| H  | -5.775918 | 1.231194  | 1.022470  |
| H  | -7.628235 | -0.230529 | 1.842527  |
| C  | -4.029454 | 0.553431  | -2.120800 |
| H  | -3.978685 | 0.596623  | -3.220222 |
| H  | -3.709388 | -0.452890 | -1.815627 |
| H  | -5.080621 | 0.677005  | -1.827759 |
| C  | -3.581047 | 5.083199  | 0.044513  |
| H  | -2.842540 | 5.882738  | 0.193832  |
| H  | -4.359664 | 5.454891  | -0.637612 |
| H  | -4.063979 | 4.886862  | 1.014841  |
| H  | -0.931752 | 4.454919  | -0.039908 |

H -1.301956 0.577595 -1.868887

83

Figure\_S15-3\_PA-9d(Na)-ts(1,6major)\_11 / electronic energy: -3681.01145389 a.u. / lowest freq: -445.76 cm-1

C -2.966054 -0.929287 1.962501  
H -2.745388 -1.412993 2.916926  
C -0.837786 -1.765681 1.100060  
H -0.555700 -1.941300 2.141825  
C -2.132255 -1.261045 0.891723  
H -2.471830 -1.065915 -0.126146  
C 0.114303 -2.242169 0.123464  
C -0.201811 -2.523949 -1.285698  
O 0.610734 -2.662867 -2.185421  
C 1.411313 -2.742236 0.596059  
O 2.235913 -3.359851 -0.057091  
O 1.651272 -2.443387 1.884972  
C -4.395959 -0.610578 1.741209  
C -4.811697 0.155865 0.641183  
C -6.159627 0.429535 0.431667  
C -7.121892 -0.049697 1.324005  
C -6.719716 -0.796226 2.430840  
C -5.367775 -1.070045 2.639659  
C -2.380537 0.998832 2.884361  
H -2.513206 0.649999 3.912627  
H -3.203230 1.596451 2.481408  
C -1.127124 1.268922 2.433514  
C -0.022341 1.307142 1.818300  
H 0.812908 2.007590 1.829110  
Cu 0.316734 -0.147034 0.438193  
C 1.428562 0.798344 -0.898030  
N 2.745834 0.853549 -1.013865  
N 0.880450 1.634677 -1.797014  
C 3.681650 0.106733 -0.176365  
C 3.194089 1.747552 -2.084260  
H 3.692600 1.146205 -2.858139  
C 1.880383 2.384792 -2.563409  
H 1.823510 3.460040 -2.332587  
C -0.516995 1.871068 -1.880860  
C -1.364302 0.852963 -2.313852  
C -1.036651 3.109195 -1.498728  
C -2.748349 1.059128 -2.363724  
C -2.412892 3.338226 -1.535508  
C -3.249765 2.303808 -1.973840  
H -4.329438 2.476195 -2.013265  
Na 2.899878 -2.718869 -2.198746  
H 1.713710 2.257171 -3.642428  
H 3.905269 2.492664 -1.699650  
O -1.509384 -2.647466 -1.533772  
C 2.883132 -2.894212 2.429278  
H 2.970722 -3.986507 2.351537  
H 2.878580 -2.588526 3.481042  
H 3.733705 -2.430370 1.908389  
C -1.874748 -3.016738 -2.855338  
H -1.545793 -2.263210 -3.584695  
H -2.967016 -3.092230 -2.859281  
H -1.429111 -3.984552 -3.123056  
H 3.112697 -0.761413 0.184688  
C 4.095445 0.926722 1.030390  
C 5.086848 1.914411 0.958880  
C 3.450219 0.721512 2.257047  
C 5.418606 2.674986 2.080652  
H 5.612662 2.092996 0.018600  
C 3.777367 1.480326 3.379683  
H 2.666815 -0.038171 2.325825  
C 4.765002 2.461992 3.294247  
H 6.195043 3.439875 2.005424  
H 3.257391 1.304564 4.324205  
H 5.025413 3.058471 4.171611  
C 4.837953 -0.468380 -1.037611  
H 5.494155 -0.994945 -0.289160  
H 5.467214 0.410492 -1.356071  
O 4.399775 -1.220446 -2.055106  
H -5.060651 -1.657723 3.508953  
H -4.063933 0.564624 -0.041823  
H -7.463058 -1.169035 3.139275  
H -6.461599 1.029949 -0.430032  
H -8.180150 0.164727 1.160110  
C -2.988169 4.647455 -1.063272  
H -2.284648 5.476592 -1.222242  
H -3.928716 4.883716 -1.580381  
H -3.206647 4.601688 0.015811  
C -3.672041 -0.038589 -2.820078  
H -4.696833 0.331679 -2.958994  
H -3.332469 -0.476627 -3.769837  
H -3.710130 -0.852615 -2.078670  
H -0.926912 -0.097401 -2.628055  
H -0.358682 3.889901 -1.145639

83

Figure\_S15-3\_PA-9d(Na)-ts(1,6major)\_12 / electronic energy: -3681.01103126 a.u. / lowest freq: -418.42 cm-1

C 2.626113 -2.179060 -1.414908

|    |           |           |           |
|----|-----------|-----------|-----------|
| H  | 2.441478  | -3.146221 | -1.885466 |
| C  | 0.535938  | -2.326386 | -0.130734 |
| H  | 0.155469  | -2.982784 | -0.917714 |
| C  | 1.845080  | -1.843660 | -0.305973 |
| H  | 2.247257  | -1.131510 | 0.415203  |
| C  | -0.333719 | -2.166220 | 1.011401  |
| C  | 0.110343  | -1.790789 | 2.360454  |
| O  | -0.611603 | -1.452169 | 3.284320  |
| C  | -1.707831 | -2.676125 | 0.903030  |
| O  | -2.506871 | -2.826191 | 1.812616  |
| O  | -2.051971 | -2.969441 | -0.360857 |
| C  | 4.004354  | -1.654454 | -1.535100 |
| C  | 4.296808  | -0.323601 | -1.196961 |
| C  | 5.593369  | 0.169887  | -1.302895 |
| C  | 6.625034  | -0.655756 | -1.755717 |
| C  | 6.344108  | -1.975796 | -2.108049 |
| C  | 5.043634  | -2.469313 | -2.004043 |
| C  | 1.787873  | -1.307400 | -3.331205 |
| H  | 1.698070  | -2.261129 | -3.859378 |
| H  | 2.673322  | -0.712862 | -3.571497 |
| C  | 0.657622  | -0.663521 | -2.945002 |
| C  | -0.300768 | -0.140644 | -2.307046 |
| H  | -1.157051 | 0.471070  | -2.594970 |
| Cu | -0.331999 | -0.440817 | -0.290575 |
| C  | -1.092885 | 1.234895  | 0.434420  |
| N  | -2.395238 | 1.479859  | 0.449853  |
| N  | -0.446053 | 2.346143  | 0.851021  |
| C  | -3.425317 | 0.529353  | 0.069187  |
| C  | -2.725839 | 2.783636  | 1.032325  |
| H  | -3.146154 | 2.611589  | 2.034470  |
| C  | -1.364418 | 3.476010  | 1.041832  |
| H  | -1.269648 | 4.197248  | 0.213833  |
| C  | 0.957876  | 2.503270  | 0.896046  |
| C  | 1.766416  | 1.498740  | 1.437712  |
| C  | 1.540317  | 3.679924  | 0.420101  |
| C  | 3.154734  | 1.651559  | 1.483884  |
| C  | 2.927481  | 3.853986  | 0.456480  |
| C  | 3.718709  | 2.831004  | 0.984217  |
| H  | 4.804176  | 2.959688  | 1.021391  |
| Na | -2.879169 | -1.104982 | 3.340492  |
| H  | -1.148280 | 3.998938  | 1.983033  |
| H  | -3.468567 | 3.316753  | 0.423913  |
| O  | 1.436026  | -1.859074 | 2.531646  |
| C  | -3.365486 | -3.461319 | -0.570695 |
| H  | -3.498257 | -4.443292 | -0.094950 |
| H  | -3.488585 | -3.547382 | -1.655376 |
| H  | -4.111150 | -2.766472 | -0.159030 |
| C  | 1.926224  | -1.555741 | 3.830132  |
| H  | 1.727198  | -0.505422 | 4.088666  |
| H  | 3.005502  | -1.735316 | 3.795542  |
| H  | 1.458920  | -2.203437 | 4.583955  |
| H  | -2.956833 | -0.466063 | 0.119560  |
| C  | -3.920905 | 0.750744  | -1.346876 |
| C  | -4.832823 | -0.157624 | -1.903465 |
| C  | -3.503684 | 1.829076  | -2.135977 |
| C  | -5.318735 | 0.010945  | -3.198021 |
| H  | -5.162988 | -1.018278 | -1.317923 |
| C  | -3.988152 | 2.001631  | -3.433774 |
| H  | -2.772155 | 2.538910  | -1.744666 |
| C  | -4.900900 | 1.095642  | -3.969969 |
| H  | -6.026452 | -0.713465 | -3.607788 |
| H  | -3.643618 | 2.850276  | -4.029237 |
| H  | -5.280367 | 1.229330  | -4.985321 |
| C  | -4.559215 | 0.536833  | 1.149403  |
| H  | -5.288362 | -0.240416 | 0.795988  |
| H  | -5.113218 | 1.505648  | 0.985242  |
| O  | -4.093577 | 0.358865  | 2.389323  |
| H  | 4.831549  | -3.505308 | -2.281296 |
| H  | 3.492225  | 0.339492  | -0.868668 |
| H  | 7.142898  | -2.628340 | -2.467925 |
| H  | 5.796290  | 1.210782  | -1.039337 |
| H  | 7.642189  | -0.267499 | -1.842849 |
| C  | 3.542158  | 5.118752  | -0.083627 |
| H  | 3.096595  | 6.007421  | 0.388217  |
| H  | 4.626362  | 5.146144  | 0.090506  |
| H  | 3.370757  | 5.206441  | -1.167677 |
| C  | 4.027842  | 0.592617  | 2.103386  |
| H  | 5.076902  | 0.714881  | 1.802333  |
| H  | 3.984475  | 0.650025  | 3.202512  |
| H  | 3.708542  | -0.418280 | 1.813232  |
| H  | 1.300024  | 0.603118  | 1.849164  |
| H  | 0.915189  | 4.469704  | -0.000769 |

83

Figure\_S15-3\_PA-9d(Na)-ts(1,6major)\_13 / electronic energy: -3681.01155941 a.u. / lowest freq: -461.85 cm<sup>-1</sup>

|   |           |          |           |
|---|-----------|----------|-----------|
| C | -3.826362 | 1.199025 | -1.066376 |
| H | -4.550017 | 1.404218 | -0.267897 |
| C | -2.935386 | 2.405451 | -1.373423 |
| H | -3.054432 | 2.783617 | -2.398605 |
| C | -1.601114 | 0.617447 | -0.658988 |

|    |           |           |           |
|----|-----------|-----------|-----------|
| C  | -0.436408 | 2.665633  | -1.346510 |
| C  | -0.566612 | 4.049747  | -1.506574 |
| C  | 0.841469  | 2.093389  | -1.368374 |
| C  | 0.564075  | 4.864175  | -1.637040 |
| C  | 1.979493  | 2.890609  | -1.471595 |
| C  | 1.829620  | 4.275971  | -1.605127 |
| H  | 2.718740  | 4.905825  | -1.697706 |
| Cu | -0.106914 | -0.522737 | -0.000384 |
| N  | -2.857337 | 0.205130  | -0.600058 |
| N  | -1.584383 | 1.871328  | -1.168191 |
| C  | 1.321436  | -1.032968 | 1.487520  |
| C  | 0.434687  | -0.017484 | 1.992680  |
| Na | -2.778968 | 1.609218  | 2.525424  |
| H  | -3.125391 | 3.239098  | -0.679019 |
| H  | -4.368542 | 0.833755  | -1.951152 |
| H  | 1.025804  | -2.056969 | 1.735174  |
| C  | 0.809621  | 1.409297  | 1.954578  |
| C  | -0.685358 | -0.431146 | 2.845734  |
| O  | -0.243458 | 2.251731  | 2.050972  |
| O  | 1.932028  | 1.837810  | 1.795737  |
| O  | -1.278723 | 0.284990  | 3.637490  |
| O  | -1.032467 | -1.714091 | 2.687247  |
| C  | -2.182875 | -2.152676 | 3.406406  |
| H  | -2.003594 | -2.108270 | 4.489819  |
| H  | -2.348999 | -3.190548 | 3.097477  |
| H  | -3.043442 | -1.517468 | 3.142963  |
| C  | 0.061555  | 3.638999  | 2.011027  |
| H  | 0.683158  | 3.927329  | 2.870641  |
| H  | -0.900722 | 4.162548  | 2.053785  |
| H  | 0.588224  | 3.895692  | 1.081875  |
| C  | -3.263862 | -1.063386 | -0.014696 |
| H  | -2.415683 | -1.385185 | 0.610104  |
| C  | -3.520664 | -2.140518 | -1.047314 |
| C  | -3.784825 | -3.447355 | -0.611908 |
| C  | -3.480117 | -1.900464 | -2.425304 |
| C  | -4.018277 | -4.474677 | -1.523110 |
| H  | -3.791914 | -3.666344 | 0.458695  |
| C  | -3.712265 | -2.927963 | -3.341296 |
| H  | -3.241756 | -0.903057 | -2.799443 |
| C  | -3.987246 | -4.218766 | -2.894684 |
| H  | -4.216569 | -5.485313 | -1.158755 |
| H  | -3.670095 | -2.715918 | -4.412108 |
| H  | -4.166177 | -5.023590 | -3.610961 |
| C  | -4.447293 | -0.810223 | 0.973227  |
| H  | -4.661377 | -1.814563 | 1.423207  |
| H  | -5.348976 | -0.614046 | 0.327205  |
| O  | -4.167423 | 0.152545  | 1.861141  |
| C  | 2.591746  | -0.887600 | 0.906711  |
| H  | 2.979788  | 0.115482  | 0.731769  |
| C  | 3.308416  | -2.012427 | 0.491581  |
| H  | 2.964957  | -2.966107 | 0.902425  |
| C  | 4.760086  | -1.978421 | 0.189701  |
| C  | 5.509098  | -3.159471 | 0.296974  |
| C  | 5.422870  | -0.807724 | -0.209488 |
| C  | 6.875200  | -3.173144 | 0.021150  |
| H  | 5.010061  | -4.082527 | 0.604686  |
| C  | 6.787456  | -0.819775 | -0.486850 |
| H  | 4.867071  | 0.125407  | -0.309689 |
| C  | 7.521376  | -2.002014 | -0.372942 |
| H  | 7.436851  | -4.105233 | 0.116035  |
| H  | 7.282704  | 0.103754  | -0.795272 |
| H  | 8.591831  | -2.009049 | -0.589527 |
| C  | 3.344061  | 2.262174  | -1.400308 |
| H  | 3.337430  | 1.243244  | -1.813924 |
| H  | 4.095323  | 2.854392  | -1.941024 |
| H  | 3.659841  | 2.193850  | -0.346455 |
| C  | 0.406023  | 6.357111  | -1.765589 |
| H  | 1.297540  | 6.818260  | -2.212377 |
| H  | -0.465003 | 6.617737  | -2.384192 |
| H  | 0.255134  | 6.818473  | -0.776208 |
| H  | -1.551544 | 4.517891  | -1.520444 |
| H  | 0.959948  | 1.009073  | -1.317088 |
| C  | 0.180437  | -1.866649 | -1.497118 |
| H  | -0.714502 | -1.953188 | -2.114967 |
| C  | 1.347119  | -2.345601 | -1.602957 |
| C  | 2.662654  | -2.676330 | -1.485659 |
| H  | 2.926552  | -3.717497 | -1.279141 |
| H  | 3.380314  | -2.129377 | -2.105752 |

83

Figure\_S15-3\_PA-9d(Na)-ts(1,6major)\_14 / electronic energy: -3681.00352015 a.u. / lowest freq: -478.56 cm<sup>-1</sup>

|   |           |          |           |
|---|-----------|----------|-----------|
| C | -3.470925 | 2.180499 | -0.462540 |
| H | -4.214185 | 2.320067 | 0.332403  |
| C | -2.346257 | 3.215263 | -0.407316 |
| H | -2.402781 | 3.957308 | -1.215212 |
| C | -1.423165 | 1.068089 | -0.362841 |
| C | 0.136625  | 2.934978 | -0.690687 |
| C | 0.342924  | 4.293661 | -0.443566 |
| C | 1.215916  | 2.144744 | -1.116064 |
| C | 1.611860  | 4.867957 | -0.604424 |



|    |           |           |           |
|----|-----------|-----------|-----------|
| C  | 2.485098  | 2.694429  | -1.265210 |
| C  | 2.672323  | 4.060523  | -1.010581 |
| H  | 3.667011  | 4.498383  | -1.133409 |
| Cu | -0.154881 | -0.441656 | -0.098247 |
| N  | -2.737948 | 0.926667  | -0.281149 |
| N  | -1.147673 | 2.380279  | -0.542211 |
| C  | 1.196274  | -1.393809 | 1.252445  |
| C  | 0.375214  | -0.455826 | 1.969608  |
| Na | -3.201494 | -3.268248 | 1.913620  |
| H  | -2.327472 | 3.747485  | 0.556878  |
| H  | -3.997010 | 2.170875  | -1.430810 |
| H  | 0.798410  | -2.413290 | 1.288462  |
| C  | 0.742719  | 0.944175  | 2.274908  |
| C  | -0.811572 | -1.058090 | 2.600027  |
| O  | 2.048512  | 1.184992  | 2.060928  |
| O  | -0.004638 | 1.819598  | 2.651001  |
| O  | -1.221382 | -2.183205 | 2.319769  |
| O  | -1.399962 | -0.322874 | 3.528969  |
| C  | -2.544369 | -0.868721 | 4.177262  |
| H  | -3.338933 | -1.102211 | 3.448120  |
| H  | -2.882773 | -0.098248 | 4.878462  |
| H  | -2.271840 | -1.777393 | 4.735478  |
| C  | 2.480356  | 2.523204  | 2.237588  |
| H  | 1.877269  | 3.212216  | 1.630836  |
| H  | 3.525996  | 2.553389  | 1.910398  |
| H  | 2.408529  | 2.819087  | 3.294435  |
| C  | -3.416003 | -0.346199 | -0.092732 |
| H  | -2.610783 | -1.076518 | 0.096443  |
| C  | -4.153055 | -0.767450 | -1.356878 |
| C  | -5.330007 | -1.523817 | -1.279257 |
| C  | -3.660492 | -0.425612 | -2.622977 |
| C  | -5.993232 | -1.924692 | -2.438815 |
| H  | -5.696067 | -1.803836 | -0.288444 |
| C  | -4.322168 | -0.828255 | -3.783092 |
| H  | -2.749890 | 0.174021  | -2.706878 |
| C  | -5.492989 | -1.580760 | -3.695202 |
| H  | -6.912222 | -2.510760 | -2.359429 |
| H  | -3.920260 | -0.549164 | -4.759907 |
| H  | -6.014329 | -1.895426 | -4.602118 |
| C  | -4.285118 | -0.355224 | 1.198207  |
| H  | -5.214088 | 0.234129  | 0.961959  |
| H  | -3.714625 | 0.301106  | 1.912044  |
| O  | -4.527908 | -1.596502 | 1.661111  |
| C  | 2.466725  | -1.267650 | 0.668948  |
| H  | 2.957757  | -0.295815 | 0.657835  |
| C  | 3.048817  | -2.367227 | 0.028143  |
| H  | 2.598988  | -3.335657 | 0.264770  |
| C  | 4.497961  | -2.448636 | -0.282840 |
| C  | 5.089047  | -3.708117 | -0.462666 |
| C  | 5.312092  | -1.312889 | -0.406958 |
| C  | 6.446033  | -3.832142 | -0.754433 |
| H  | 4.472344  | -4.606393 | -0.369264 |
| C  | 6.667904  | -1.434078 | -0.700864 |
| H  | 4.882710  | -0.319473 | -0.274603 |
| C  | 7.242799  | -2.693871 | -0.876190 |
| H  | 6.884174  | -4.824117 | -0.886040 |
| H  | 7.281552  | -0.534869 | -0.791939 |
| H  | 8.306772  | -2.787992 | -1.103666 |
| C  | 3.644221  | 1.837544  | -1.699337 |
| H  | 4.078598  | 2.203575  | -2.642211 |
| H  | 4.446529  | 1.862303  | -0.945464 |
| H  | 3.341764  | 0.791217  | -1.845611 |
| C  | 1.809179  | 6.333372  | -0.315964 |
| H  | 2.842335  | 6.647388  | -0.517445 |
| H  | 1.137494  | 6.952375  | -0.930100 |
| H  | 1.585529  | 6.558205  | 0.738415  |
| H  | -0.480451 | 4.926724  | -0.109688 |
| H  | 1.060734  | 1.091998  | -1.360026 |
| C  | -0.033697 | -1.488507 | -1.832697 |
| H  | -0.922406 | -1.345645 | -2.448425 |
| C  | 1.069359  | -2.072172 | -2.043434 |
| C  | 2.340786  | -2.563159 | -2.007496 |
| H  | 2.484049  | -3.647612 | -2.018367 |
| H  | 3.114789  | -1.992578 | -2.531699 |

83

Figure\_S15-3\_PA-9d(Na)-ts(1,6major)\_15 / electronic energy: -3680.99812292 a.u. / lowest freq: -456.22 cm-1

|    |           |           |           |
|----|-----------|-----------|-----------|
| C  | -3.745612 | 0.706435  | -1.616098 |
| H  | -3.891489 | 1.110388  | -2.626480 |
| C  | -3.993235 | -0.801856 | -1.537699 |
| H  | -4.888799 | -1.061052 | -0.956045 |
| C  | -1.830619 | -0.328835 | -0.773310 |
| C  | -2.613168 | -2.648010 | -0.535452 |
| C  | -3.493909 | -3.606239 | -1.043389 |
| C  | -1.575714 | -3.059558 | 0.314371  |
| C  | -3.330088 | -4.964766 | -0.737719 |
| C  | -1.383947 | -4.404672 | 0.612797  |
| C  | -2.270271 | -5.351892 | 0.080529  |
| H  | -2.129594 | -6.410693 | 0.315948  |
| Cu | 0.089623  | -0.514937 | -0.257230 |

|    |           |           |           |
|----|-----------|-----------|-----------|
| N  | -2.343294 | 0.809530  | -1.212390 |
| N  | -2.779248 | -1.290908 | -0.872053 |
| C  | 1.660321  | -0.361891 | 1.162722  |
| C  | 0.566797  | 0.472391  | 1.598629  |
| Na | 1.437437  | 3.501638  | -1.542717 |
| H  | -4.088486 | -1.254813 | -2.537144 |
| H  | -4.379744 | 1.280134  | -0.922814 |
| H  | 1.612390  | -1.389892 | 1.536030  |
| C  | 0.656714  | 1.926079  | 1.404570  |
| C  | -0.457540 | -0.078205 | 2.509832  |
| O  | 0.043303  | 2.657250  | 2.322009  |
| O  | 1.284666  | 2.456388  | 0.492053  |
| O  | -1.479446 | 0.465218  | 2.867152  |
| O  | -0.174176 | -1.342991 | 2.894789  |
| C  | -1.163238 | -2.003527 | 3.666224  |
| H  | -1.345956 | -1.472249 | 4.610642  |
| H  | -0.771014 | -3.005847 | 3.870060  |
| H  | -2.109243 | -2.078533 | 3.109927  |
| C  | 0.070397  | 4.067577  | 2.159660  |
| H  | 1.099140  | 4.449032  | 2.230654  |
| H  | -0.539104 | 4.474781  | 2.972844  |
| H  | -0.366129 | 4.357183  | 1.192958  |
| C  | -1.587407 | 2.048117  | -1.314441 |
| H  | -0.613966 | 1.818860  | -0.856390 |
| C  | -2.243480 | 3.146187  | -0.492800 |
| C  | -2.325652 | 4.461305  | -0.966737 |
| C  | -2.757263 | 2.853618  | 0.777133  |
| C  | -2.922968 | 5.456778  | -0.192326 |
| H  | -1.874147 | 4.692051  | -1.933742 |
| C  | -3.356965 | 3.847841  | 1.548218  |
| H  | -2.656485 | 1.845709  | 1.188349  |
| C  | -3.445440 | 5.153843  | 1.065009  |
| H  | -2.979665 | 6.478372  | -0.576443 |
| H  | -3.746902 | 3.601611  | 2.538597  |
| H  | -3.913948 | 5.934133  | 1.669482  |
| C  | -1.245076 | 2.432471  | -2.780357 |
| H  | -2.207418 | 2.773365  | -3.258316 |
| H  | -1.024961 | 1.447912  | -3.279141 |
| O  | -0.248441 | 3.334622  | -2.845099 |
| C  | 2.874607  | 0.000494  | 0.559308  |
| H  | 3.025136  | 1.034990  | 0.252811  |
| C  | 3.837069  | -0.965091 | 0.262359  |
| H  | 3.717302  | -1.928964 | 0.765665  |
| C  | 5.245606  | -0.615884 | -0.044988 |
| C  | 6.263901  | -1.523046 | 0.280262  |
| C  | 5.605748  | 0.591781  | -0.663805 |
| C  | 7.600391  | -1.231256 | 0.011400  |
| H  | 6.002448  | -2.471792 | 0.756701  |
| C  | 6.939839  | 0.884093  | -0.934354 |
| H  | 4.833051  | 1.309189  | -0.949359 |
| C  | 7.944775  | -0.024969 | -0.596749 |
| H  | 8.376119  | -1.951999 | 0.279435  |
| H  | 7.198029  | 1.829231  | -1.417494 |
| H  | 8.990846  | 0.205528  | -0.809597 |
| C  | -0.244622 | -4.834289 | 1.499696  |
| H  | -0.616402 | -5.329773 | 2.410002  |
| H  | 0.404390  | -5.555130 | 0.979638  |
| H  | 0.372908  | -3.977270 | 1.802445  |
| C  | -4.281649 | -5.979863 | -1.316562 |
| H  | -4.143035 | -6.968009 | -0.857024 |
| H  | -5.328148 | -5.675076 | -1.167050 |
| H  | -4.125946 | -6.088826 | -2.401510 |
| H  | -4.316979 | -3.313012 | -1.696465 |
| H  | -0.909809 | -2.324524 | 0.764702  |
| C  | 0.803012  | -1.658349 | -1.779502 |
| H  | -0.006744 | -1.954079 | -2.446840 |
| C  | 2.050161  | -1.872607 | -1.821609 |
| C  | 3.399400  | -1.914470 | -1.651538 |
| H  | 3.866448  | -2.865201 | -1.377317 |
| H  | 4.010318  | -1.263232 | -2.283972 |

83

Figure\_S15-3\_PA-9d(Na)-ts(1,6major)\_16 / electronic energy: -3681.00337669 a.u. / lowest freq: -462.64 cm-1

|   |           |           |           |
|---|-----------|-----------|-----------|
| C | 0.432632  | 0.833593  | 1.624317  |
| O | -0.331710 | -0.952619 | 2.995834  |
| C | -0.558071 | 0.126350  | 2.451766  |
| C | 0.364498  | 2.272817  | 1.302100  |
| O | 1.137388  | 2.839589  | 0.551115  |
| O | -0.601634 | 2.940222  | 1.936357  |
| O | -1.753570 | 0.696275  | 2.526200  |
| C | 1.629201  | 0.096407  | 1.324418  |
| C | 2.303868  | -1.368885 | -1.651259 |
| C | 1.043201  | -1.263649 | -1.709369 |
| H | 0.315219  | -1.625701 | -2.436860 |
| C | 3.637391  | -1.316845 | -1.384762 |
| H | 4.150510  | -2.240472 | -1.099428 |
| H | 4.242288  | -0.606797 | -1.956472 |
| H | 3.777233  | -1.357967 | 1.062740  |
| C | 3.886672  | -0.383622 | 0.576488  |
| H | 1.617680  | -0.926695 | 1.718948  |

|    |           |           |           |
|----|-----------|-----------|-----------|
| H  | 2.957945  | 1.567982  | 0.490716  |
| C  | 5.295117  | 0.031723  | 0.369273  |
| C  | 5.641114  | 1.271359  | -0.191596 |
| C  | 6.328857  | -0.844231 | 0.730191  |
| C  | 7.665884  | -0.494205 | 0.547722  |
| C  | 7.995750  | 0.741623  | -0.007006 |
| C  | 6.976047  | 1.621513  | -0.376186 |
| Cu | 0.147415  | -0.246845 | -0.218866 |
| N  | -2.503102 | -1.464465 | -0.026259 |
| N  | -2.744104 | 0.606488  | -0.632069 |
| C  | -1.844115 | -0.369746 | -0.383784 |
| C  | -3.959656 | -1.300973 | -0.046987 |
| H  | -4.379876 | -1.654994 | 0.903446  |
| C  | -4.106732 | 0.205138  | -0.265124 |
| H  | -4.819755 | 0.457824  | -1.061835 |
| C  | -2.433417 | 1.909788  | -1.061666 |
| C  | -3.364560 | 2.943103  | -0.890736 |
| C  | -1.215284 | 2.183082  | -1.689707 |
| C  | -3.082886 | 4.236496  | -1.336753 |
| C  | -0.902113 | 3.476269  | -2.112376 |
| C  | -1.847032 | 4.491576  | -1.941017 |
| H  | -1.614077 | 5.505581  | -2.278601 |
| Na | -1.406285 | -2.838315 | 3.731496  |
| H  | -4.418349 | 0.726261  | 0.654170  |
| H  | -4.403332 | -1.886839 | -0.867710 |
| C  | -2.783823 | -0.011922 | 3.201508  |
| H  | -2.954365 | -1.000747 | 2.736602  |
| H  | -3.679490 | 0.614180  | 3.116812  |
| H  | -2.539655 | -0.135235 | 4.268381  |
| C  | -0.730631 | 4.316975  | 1.626736  |
| H  | -0.942404 | 4.458034  | 0.557903  |
| H  | 0.185224  | 4.867945  | 1.885550  |
| H  | -1.571175 | 4.684771  | 2.225982  |
| C  | -1.854680 | -2.748712 | 0.219079  |
| H  | -0.947334 | -2.528692 | 0.806144  |
| C  | -1.433928 | -3.441351 | -1.059691 |
| C  | -0.417194 | -4.402334 | -1.003335 |
| C  | -2.024394 | -3.171845 | -2.297969 |
| C  | 0.002472  | -5.072963 | -2.149323 |
| H  | 0.070172  | -4.608853 | -0.046363 |
| C  | -1.605607 | -3.839144 | -3.450270 |
| H  | -2.804325 | -2.412180 | -2.378213 |
| C  | -0.590728 | -4.792227 | -3.381030 |
| H  | 0.805428  | -5.810752 | -2.083998 |
| H  | -2.075209 | -3.608217 | -4.409178 |
| H  | -0.258256 | -5.309586 | -4.283582 |
| C  | -2.749451 | -3.653358 | 1.120224  |
| H  | -2.193591 | -4.628300 | 1.155291  |
| H  | -3.653093 | -3.897427 | 0.493721  |
| O  | -3.023932 | -3.113591 | 2.319668  |
| C  | 2.856474  | 0.529984  | 0.804303  |
| H  | 6.078735  | -1.816161 | 1.164304  |
| H  | 4.858305  | 1.967841  | -0.499552 |
| H  | 8.453180  | -1.192536 | 0.840548  |
| H  | 7.222840  | 2.589992  | -0.817179 |
| H  | 9.042057  | 1.017488  | -0.154961 |
| C  | 0.455012  | 3.753864  | -2.698269 |
| H  | 0.742951  | 2.981673  | -3.426663 |
| H  | 0.493449  | 4.733425  | -3.194341 |
| H  | 1.204408  | 3.740684  | -1.891518 |
| C  | -4.098916 | 5.338098  | -1.179213 |
| H  | -3.619067 | 6.283858  | -0.888427 |
| H  | -4.626393 | 5.519117  | -2.129519 |
| H  | -4.853945 | 5.086873  | -0.421559 |
| H  | -4.320661 | 2.750492  | -0.402240 |
| H  | -0.496916 | 1.378462  | -1.861678 |

83

Figure\_S15-3\_PA-9d(Na)-ts(1,6major)\_17 / electronic energy: -3680.99860603 a.u. / lowest freq: -447.57 cm-1

|    |           |           |           |
|----|-----------|-----------|-----------|
| C  | 4.349904  | -2.269685 | -0.494220 |
| C  | 4.577515  | -2.086770 | 0.878069  |
| C  | 5.825601  | -2.350420 | 1.437642  |
| C  | 6.875809  | -2.804331 | 0.638984  |
| C  | 6.663211  | -2.996396 | -0.726506 |
| C  | 5.414719  | -2.731662 | -1.284080 |
| C  | 3.041338  | -1.994218 | -1.131752 |
| C  | 1.846374  | -1.921692 | -0.409829 |
| H  | 1.864557  | -1.848694 | 0.678978  |
| C  | 0.606880  | -1.899294 | -1.075132 |
| C  | -0.717294 | -2.023885 | -0.526728 |
| H  | 0.635268  | -1.977927 | -2.166239 |
| C  | -0.963956 | -2.469531 | 0.853994  |
| O  | -1.750740 | -3.343357 | 1.177047  |
| C  | -1.794019 | -2.069343 | -1.522612 |
| O  | -1.636889 | -1.879116 | -2.713074 |
| Cu | 0.067201  | 0.039610  | -0.584842 |
| N  | -2.013804 | 1.628292  | 0.873843  |
| C  | -0.748518 | 1.531212  | 0.477120  |
| N  | -0.151162 | 2.720774  | 0.697517  |
| C  | 1.218866  | 1.028153  | -1.977237 |

|    |           |           |           |
|----|-----------|-----------|-----------|
| H  | 0.679288  | 1.922746  | -2.287494 |
| C  | 2.400840  | 0.618969  | -2.146348 |
| H  | 3.985376  | -0.532775 | -2.967561 |
| C  | 3.584846  | -0.047144 | -2.073624 |
| H  | 4.334566  | 0.323185  | -1.367200 |
| C  | -2.948181 | 0.519121  | 0.942921  |
| C  | -2.339169 | 2.926741  | 1.469203  |
| H  | -2.502574 | 2.814293  | 2.551780  |
| C  | -1.091960 | 3.753473  | 1.147725  |
| H  | -1.276678 | 4.485454  | 0.345655  |
| C  | 1.231643  | 2.978107  | 0.551589  |
| C  | 2.161950  | 2.092756  | 1.098081  |
| C  | 1.660482  | 4.126715  | -0.114770 |
| C  | 3.530381  | 2.329553  | 0.953777  |
| C  | 3.025176  | 4.386980  | -0.265967 |
| C  | 3.943327  | 3.475956  | 0.266147  |
| H  | 5.013717  | 3.670722  | 0.150893  |
| Na | -3.948829 | -2.780883 | 1.300741  |
| H  | -0.691812 | 4.289506  | 2.018922  |
| H  | -3.255790 | 3.337409  | 1.022979  |
| O  | -0.241289 | -1.820125 | 1.767657  |
| O  | -3.034677 | -2.270347 | -1.017927 |
| C  | -4.099885 | -2.206241 | -1.959379 |
| H  | -4.147693 | -1.212276 | -2.424027 |
| H  | -5.024402 | -2.387106 | -1.399461 |
| H  | -3.977397 | -2.969398 | -2.739955 |
| C  | -0.552012 | -2.092183 | 3.133108  |
| H  | -1.613779 | -1.856041 | 3.312312  |
| H  | 0.100949  | -1.441077 | 3.724121  |
| H  | -0.354888 | -3.145567 | 3.376270  |
| H  | -2.385086 | -0.348372 | 0.576890  |
| C  | -4.118971 | 0.723706  | -0.004231 |
| C  | -5.401223 | 0.259488  | 0.313525  |
| C  | -3.921139 | 1.341946  | -1.245319 |
| C  | -6.454139 | 0.405792  | -0.590086 |
| H  | -5.547980 | -0.238304 | 1.274839  |
| C  | -4.973093 | 1.491812  | -2.148252 |
| H  | -2.925783 | 1.707933  | -1.510319 |
| C  | -6.245790 | 1.020241  | -1.824924 |
| H  | -7.447818 | 0.035096  | -0.326183 |
| H  | -4.796186 | 1.975481  | -3.111747 |
| H  | -7.070366 | 1.132391  | -2.532552 |
| C  | -3.323255 | 0.170760  | 2.413598  |
| H  | -4.033922 | 0.971441  | 2.764389  |
| H  | -2.374795 | 0.371541  | 2.987685  |
| O  | -3.793770 | -1.080077 | 2.552706  |
| H  | 2.955757  | -2.368193 | -2.153947 |
| H  | 5.257539  | -2.883791 | -2.355396 |
| H  | 3.774918  | -1.724931 | 1.522877  |
| H  | 7.475190  | -3.355124 | -1.363070 |
| H  | 5.979568  | -2.196383 | 2.508050  |
| H  | 7.854101  | -3.007907 | 1.079548  |
| C  | 3.494675  | 5.636525  | -0.964783 |
| H  | 4.462571  | 5.478712  | -1.461029 |
| H  | 2.769648  | 5.972389  | -1.719451 |
| H  | 3.624630  | 6.458862  | -0.242611 |
| C  | 4.540426  | 1.367792  | 1.520413  |
| H  | 5.473158  | 1.879575  | 1.796141  |
| H  | 4.150421  | 0.854551  | 2.410832  |
| H  | 4.797411  | 0.588311  | 0.786344  |
| H  | 1.805814  | 1.211629  | 1.637247  |
| H  | 0.926299  | 4.816348  | -0.537766 |

83

Figure\_S15-3\_PA-9d(Na)-ts(1,6minor)\_01 / electronic energy: -3681.01261478 a.u. / lowest freq: -459.96 cm-1

|    |           |           |           |
|----|-----------|-----------|-----------|
| C  | 3.659544  | 2.047246  | -0.366906 |
| H  | 4.051864  | 2.555127  | 0.522168  |
| C  | 4.175987  | 0.617260  | -0.516602 |
| H  | 4.864432  | 0.492678  | -1.363392 |
| C  | 1.838989  | 0.587570  | -0.437054 |
| C  | 2.960065  | -1.534459 | -0.968542 |
| C  | 4.149817  | -2.254209 | -0.824326 |
| C  | 1.799290  | -2.212280 | -1.368197 |
| C  | 4.182549  | -3.637772 | -1.048592 |
| C  | 1.805568  | -3.589583 | -1.566834 |
| C  | 3.006223  | -4.294472 | -1.407170 |
| H  | 3.021482  | -5.375544 | -1.571763 |
| Cu | -0.052747 | -0.026957 | -0.282358 |
| N  | 2.219273  | 1.832147  | -0.200960 |
| N  | 2.940741  | -0.148649 | -0.723460 |
| C  | -1.406247 | -1.192830 | 0.925565  |
| C  | -0.363215 | -0.625273 | 1.741140  |
| Na | 2.414098  | 1.220797  | 3.079838  |
| H  | 4.685482  | 0.268478  | 0.396785  |
| H  | 3.857266  | 2.662778  | -1.258609 |
| H  | -1.143551 | -2.164928 | 0.493393  |
| C  | 0.833419  | -1.426176 | 2.052715  |
| C  | -0.517378 | 0.625019  | 2.497523  |
| O  | 0.702309  | -2.713141 | 1.723429  |
| O  | 1.872805  | -1.002170 | 2.535225  |

|   |           |           |           |
|---|-----------|-----------|-----------|
| O | 0.139354  | 0.959898  | 3.467674  |
| O | -1.461712 | 1.436263  | 2.000773  |
| C | -1.624071 | 2.695875  | 2.639351  |
| H | -1.915876 | 2.567285  | 3.690473  |
| H | -2.414555 | 3.214145  | 2.086305  |
| H | -0.687394 | 3.271175  | 2.597527  |
| C | 1.842622  | -3.542856 | 1.887734  |
| H | 2.707214  | -3.128827 | 1.351460  |
| H | 1.573747  | -4.516342 | 1.464302  |
| H | 2.090698  | -3.650111 | 2.953172  |
| C | 1.303488  | 2.899082  | 0.174318  |
| H | 0.479763  | 2.409590  | 0.715767  |
| C | 0.707716  | 3.616456  | -1.017868 |
| C | 1.158006  | 3.418929  | -2.327548 |
| C | -0.347302 | 4.515648  | -0.808469 |
| C | 0.580953  | 4.107297  | -3.395645 |
| H | 1.956395  | 2.701785  | -2.527988 |
| C | -0.925803 | 5.204561  | -1.872244 |
| H | -0.731667 | 4.667426  | 0.203412  |
| C | -0.460821 | 5.005697  | -3.172922 |
| H | 0.947875  | 3.934180  | -4.409995 |
| H | -1.749346 | 5.897443  | -1.684748 |
| H | -0.915430 | 5.540997  | -4.009344 |
| C | 2.011379  | 3.838889  | 1.205697  |
| H | 1.223260  | 4.586326  | 1.490204  |
| H | 2.737771  | 4.449566  | 0.595178  |
| O | 2.556483  | 3.168668  | 2.226204  |
| C | -2.750928 | -0.825870 | 0.784339  |
| H | -3.117401 | 0.064702  | 1.293180  |
| C | -3.585026 | -1.513435 | -0.096893 |
| H | -3.216921 | -2.481294 | -0.451129 |
| C | -5.062979 | -1.407082 | -0.042764 |
| C | -5.846104 | -2.486908 | -0.474925 |
| C | -5.717896 | -0.255163 | 0.421237  |
| C | -7.238474 | -2.427136 | -0.433246 |
| H | -5.353980 | -3.389598 | -0.846991 |
| C | -7.108018 | -0.193642 | 0.462069  |
| H | -5.135871 | 0.610796  | 0.744256  |
| C | -7.875891 | -1.280064 | 0.037321  |
| H | -7.827715 | -3.282881 | -0.770557 |
| H | -7.597389 | 0.712199  | 0.827015  |
| H | -8.966327 | -1.228993 | 0.070852  |
| C | 0.528144  | -4.306465 | -1.915511 |
| H | -0.224144 | -3.611830 | -2.315294 |
| H | 0.698584  | -5.101549 | -2.655583 |
| H | 0.098276  | -4.779192 | -1.017398 |
| C | 5.480189  | -4.387041 | -0.891376 |
| H | 5.911320  | -4.227961 | 0.108759  |
| H | 5.340563  | -5.466963 | -1.035210 |
| H | 6.224967  | -4.040376 | -1.624467 |
| H | 5.071431  | -1.751542 | -0.528467 |
| H | 0.876097  | -1.659899 | -1.549673 |
| C | -0.904423 | 0.218537  | -2.097521 |
| H | -0.241045 | 0.749398  | -2.781396 |
| C | -2.093103 | -0.199342 | -2.230770 |
| C | -3.362822 | -0.671765 | -2.113501 |
| H | -3.634098 | -1.595490 | -2.633831 |
| H | -4.165872 | 0.064162  | -2.015214 |

83

Figure\_S15-3\_PA-9d(Na)-ts(1,6minor)\_02 / electronic energy: -3681.01062138 a.u. / lowest freq: -444.26 cm-1

|    |           |           |           |
|----|-----------|-----------|-----------|
| C  | -3.584500 | -2.115325 | -0.695902 |
| H  | -4.062522 | -2.559701 | 0.188613  |
| C  | -4.132110 | -0.738477 | -1.070779 |
| H  | -4.339909 | -0.655612 | -2.148903 |
| C  | -1.914146 | -0.524214 | -0.341504 |
| C  | -3.151362 | 1.555728  | -0.830673 |
| C  | -2.199622 | 2.428895  | -0.281987 |
| C  | -4.241501 | 2.098087  | -1.517929 |
| C  | -2.301709 | 3.805966  | -0.450235 |
| C  | -4.374140 | 3.484274  | -1.680781 |
| C  | -3.397302 | 4.326321  | -1.153100 |
| H  | -3.488265 | 5.408116  | -1.285285 |
| Cu | -0.081573 | 0.216282  | -0.041679 |
| N  | -2.193449 | -1.814798 | -0.359605 |
| N  | -3.032930 | 0.160045  | -0.695152 |
| C  | 1.464881  | 0.945675  | 1.237968  |
| C  | 0.550112  | 0.132539  | 2.007738  |
| H  | -5.049337 | -0.478943 | -0.523183 |
| H  | -3.638538 | -2.828714 | -1.529852 |
| H  | 1.185423  | 2.003564  | 1.204212  |
| C  | -0.573112 | 0.781808  | 2.705536  |
| C  | 0.824102  | -1.261784 | 2.384573  |
| O  | -0.537233 | 2.120705  | 2.634162  |
| O  | -1.491978 | 0.219142  | 3.277603  |
| O  | 0.275529  | -1.889944 | 3.272823  |
| O  | 1.761913  | -1.843533 | 1.624217  |
| C  | 2.040374  | -3.214027 | 1.876618  |
| H  | 2.424700  | -3.354322 | 2.895923  |
| H  | 2.797130  | -3.507357 | 1.141377  |

|    |           |           |           |
|----|-----------|-----------|-----------|
| H  | 1.133711  | -3.822536 | 1.746834  |
| C  | -1.645319 | 2.822640  | 3.178255  |
| H  | -2.572425 | 2.551643  | 2.652631  |
| H  | -1.431688 | 3.886496  | 3.030867  |
| H  | -1.759413 | 2.605123  | 4.248732  |
| C  | -1.237268 | -2.872153 | -0.032157 |
| H  | -0.512549 | -2.399469 | 0.641461  |
| C  | -0.487327 | -3.323587 | -1.269129 |
| C  | -1.040995 | -4.213564 | -2.198697 |
| C  | 0.790510  | -2.806856 | -1.520806 |
| C  | -0.336930 | -4.569842 | -3.349559 |
| H  | -2.032115 | -4.638747 | -2.025327 |
| C  | 1.494499  | -3.156573 | -2.671438 |
| H  | 1.237553  | -2.112820 | -0.803771 |
| C  | 0.931145  | -4.040857 | -3.591347 |
| H  | -0.783201 | -5.266293 | -4.063316 |
| H  | 2.485535  | -2.732881 | -2.849744 |
| H  | 1.478297  | -4.317664 | -4.495380 |
| C  | -1.936234 | -3.979675 | 0.801957  |
| H  | -1.116125 | -4.725668 | 0.999570  |
| H  | -2.617528 | -4.532487 | 0.095755  |
| O  | -2.552204 | -3.491887 | 1.886603  |
| C  | 2.752066  | 0.666685  | 0.752864  |
| H  | 3.152264  | -0.340931 | 0.845679  |
| C  | 3.480478  | 1.638378  | 0.068945  |
| H  | 3.130869  | 2.669386  | 0.173982  |
| C  | 4.934995  | 1.507723  | -0.184328 |
| C  | 5.723129  | 2.663397  | -0.280877 |
| C  | 5.560871  | 0.260878  | -0.342683 |
| C  | 7.095494  | 2.579601  | -0.512495 |
| H  | 5.251551  | 3.643312  | -0.167432 |
| C  | 6.930637  | 0.175988  | -0.575581 |
| H  | 4.968770  | -0.656042 | -0.297067 |
| C  | 7.705729  | 1.334863  | -0.659519 |
| H  | 7.689931  | 3.493684  | -0.578542 |
| H  | 7.398333  | -0.803669 | -0.697395 |
| H  | 8.780116  | 1.265130  | -0.842463 |
| C  | 0.408509  | 0.835728  | -1.909296 |
| H  | -0.422035 | 0.668625  | -2.595768 |
| C  | 1.578137  | 1.281077  | -2.104072 |
| C  | 2.877809  | 1.671727  | -2.058486 |
| H  | 3.119252  | 2.731485  | -2.183081 |
| H  | 3.634723  | 0.970555  | -2.422030 |
| Na | -2.044418 | -2.030263 | 3.351863  |
| H  | -5.005373 | 1.449585  | -1.948334 |
| H  | -1.363604 | 2.041099  | 0.297086  |
| C  | -5.566563 | 4.037246  | -2.417758 |
| H  | -6.495305 | 3.855983  | -1.854297 |
| H  | -5.473521 | 5.120109  | -2.576712 |
| H  | -5.684707 | 3.555597  | -3.400119 |
| C  | -1.244508 | 4.721813  | 0.109009  |
| H  | -0.489223 | 4.161653  | 0.677446  |
| H  | -0.728253 | 5.259288  | -0.701482 |
| H  | -1.684840 | 5.480917  | 0.773480  |

83

Figure\_S15-3\_PA-9d(Na)-ts(1,6minor)\_03 / electronic energy: -3681.01372521 a.u. / lowest freq: -473.84 cm-1

|    |           |           |           |
|----|-----------|-----------|-----------|
| C  | 3.459868  | 2.242979  | -0.205475 |
| H  | 3.814140  | 2.770864  | 0.688122  |
| C  | 4.089084  | 0.860370  | -0.366599 |
| H  | 4.815086  | 0.811480  | -1.189270 |
| C  | 1.759060  | 0.660216  | -0.360327 |
| C  | 3.049753  | -1.341876 | -0.982350 |
| C  | 4.282995  | -1.987520 | -0.830339 |
| C  | 1.966741  | -2.059292 | -1.504903 |
| C  | 4.432945  | -3.335082 | -1.177205 |
| C  | 2.090275  | -3.408446 | -1.832605 |
| C  | 3.330632  | -4.035488 | -1.672292 |
| H  | 3.440537  | -5.090191 | -1.940252 |
| Cu | -0.077314 | -0.113518 | -0.280055 |
| N  | 2.040612  | 1.919636  | -0.073875 |
| N  | 2.921281  | 0.016406  | -0.640068 |
| C  | -1.427661 | -1.383063 | 0.794631  |
| C  | -0.389160 | -0.908463 | 1.669406  |
| Na | 2.227666  | 0.851759  | 3.267826  |
| H  | 4.590013  | 0.526959  | 0.557315  |
| H  | 3.623579  | 2.880802  | -1.088373 |
| H  | -1.183684 | -2.321040 | 0.282976  |
| C  | 0.810403  | -1.725592 | 1.908525  |
| C  | -0.577241 | 0.219873  | 2.600680  |
| O  | 0.714679  | -2.967026 | 1.425809  |
| O  | 1.830997  | -1.340405 | 2.460269  |
| O  | -0.044092 | 0.326163  | 3.689609  |
| O  | -1.395555 | 1.168885  | 2.135205  |
| C  | -1.506739 | 2.350554  | 2.927056  |
| H  | -1.996575 | 2.130587  | 3.885960  |
| H  | -2.121246 | 3.042557  | 2.340797  |
| H  | -0.500705 | 2.761715  | 3.102094  |
| C  | 1.863292  | -3.792831 | 1.544487  |
| H  | 2.739345  | -3.314041 | 1.086988  |

|   |           |           |           |
|---|-----------|-----------|-----------|
| H | 1.626926  | -4.721935 | 1.015011  |
| H | 2.075859  | -4.004924 | 2.601996  |
| C | 1.043163  | 2.915067  | 0.313408  |
| H | 0.161032  | 2.326438  | 0.601202  |
| C | 0.652432  | 3.806012  | -0.846796 |
| C | 1.499744  | 4.811077  | -1.333604 |
| C | -0.595108 | 3.632896  | -1.459626 |
| C | 1.113877  | 5.610807  | -2.409648 |
| H | 2.472058  | 4.980565  | -0.865593 |
| C | -0.984535 | 4.430843  | -2.534582 |
| H | -1.266025 | 2.850855  | -1.093841 |
| C | -0.128737 | 5.422409  | -3.014656 |
| H | 1.789004  | 6.387952  | -2.775410 |
| H | -1.960539 | 4.275591  | -3.000168 |
| H | -0.430396 | 6.049119  | -3.857033 |
| C | 1.506964  | 3.659251  | 1.594977  |
| H | 0.650286  | 4.351461  | 1.825163  |
| H | 2.328625  | 4.363140  | 1.284284  |
| O | 1.842174  | 2.816855  | 2.579697  |
| C | -2.757730 | -0.956807 | 0.675706  |
| H | -3.088100 | -0.090259 | 1.248099  |
| C | -3.618211 | -1.541191 | -0.256526 |
| H | -3.300175 | -2.508712 | -0.656838 |
| C | -5.091226 | -1.371191 | -0.183977 |
| C | -5.927614 | -2.387761 | -0.666072 |
| C | -5.687815 | -0.214846 | 0.343116  |
| C | -7.315407 | -2.263264 | -0.611640 |
| H | -5.481212 | -3.292517 | -1.087645 |
| C | -7.073066 | -0.088645 | 0.397205  |
| H | -5.062461 | 0.603888  | 0.706028  |
| C | -7.894737 | -1.113068 | -0.077918 |
| H | -7.947195 | -3.070773 | -0.988596 |
| H | -7.516550 | 0.819374  | 0.812106  |
| H | -8.981234 | -1.011409 | -0.033991 |
| C | 0.888428  | -4.175264 | -2.317015 |
| H | 0.152529  | -3.510260 | -2.790835 |
| H | 1.168871  | -4.957247 | -3.036607 |
| H | 0.386479  | -4.669530 | -1.469028 |
| C | 5.757180  | -4.025592 | -0.976959 |
| H | 5.800228  | -4.502793 | 0.015406  |
| H | 5.914600  | -4.813669 | -1.726871 |
| H | 6.594788  | -3.316632 | -1.038132 |
| H | 5.145954  | -1.449135 | -0.436411 |
| H | 1.015512  | -1.557098 | -1.687042 |
| C | -0.873424 | 0.185519  | -2.124329 |
| H | -0.175896 | 0.707605  | -2.779560 |
| C | -2.071149 | -0.189076 | -2.293842 |
| C | -3.358047 | -0.625107 | -2.197508 |
| H | -3.654814 | -1.512747 | -2.764838 |
| H | -4.135100 | 0.138116  | -2.093224 |

83

Figure\_S15-3\_PA-9d(Na)-ts(1,6minor)\_04 / electronic energy: -3681.01376311 a.u. / lowest freq: -473.62 cm-1

|    |           |           |           |
|----|-----------|-----------|-----------|
| C  | 3.467132  | 2.234161  | -0.207755 |
| H  | 3.823505  | 2.761080  | 0.685550  |
| C  | 4.092210  | 0.849749  | -0.369127 |
| H  | 4.818350  | 0.798725  | -1.191560 |
| C  | 1.761705  | 0.656322  | -0.361988 |
| C  | 3.047097  | -1.349486 | -0.983835 |
| C  | 4.276770  | -1.998573 | -0.831228 |
| C  | 1.960281  | -2.064595 | -1.505208 |
| C  | 4.421731  | -3.348819 | -1.175609 |
| C  | 2.078480  | -3.413671 | -1.829593 |
| C  | 3.317726  | -4.045812 | -1.667538 |
| H  | 3.422626  | -5.101869 | -1.931671 |
| Cu | -0.077005 | -0.112207 | -0.280768 |
| N  | 2.047075  | 1.914782  | -0.075085 |
| N  | 2.921982  | 0.009482  | -0.643154 |
| C  | -1.430360 | -1.378168 | 0.794992  |
| C  | -0.391194 | -0.904621 | 1.669532  |
| Na | 2.228298  | 0.849371  | 3.270446  |
| H  | 4.591710  | 0.514467  | 0.554910  |
| H  | 3.631944  | 2.871358  | -1.090914 |
| H  | -1.187767 | -2.316859 | 0.284000  |
| C  | 0.806361  | -1.724242 | 1.910176  |
| C  | -0.577030 | 0.225753  | 2.598602  |
| O  | 0.708070  | -2.965728 | 1.428213  |
| O  | 1.827465  | -1.341084 | 2.462379  |
| O  | -0.043370 | 0.333518  | 3.687155  |
| O  | -1.393582 | 1.175533  | 2.131418  |
| C  | -1.501962 | 2.359004  | 2.920893  |
| H  | -1.992341 | 2.142143  | 3.880220  |
| H  | -2.114651 | 3.051420  | 2.333237  |
| H  | -0.495116 | 2.768234  | 3.095550  |
| C  | 1.855040  | -3.793791 | 1.547172  |
| H  | 2.731620  | -3.317596 | 1.087971  |
| H  | 1.616254  | -4.723160 | 1.019258  |
| H  | 2.068130  | -4.004783 | 2.604786  |
| C  | 1.052847  | 2.913072  | 0.313194  |
| H  | 0.169914  | 2.326941  | 0.603523  |

|   |           |           |           |
|---|-----------|-----------|-----------|
| C | 0.661600  | 3.803564  | -0.847180 |
| C | -0.587804 | 3.632770  | -1.456853 |
| C | 1.510229  | 4.805932  | -1.337230 |
| C | -0.977790 | 4.430321  | -2.531898 |
| H | -1.259783 | 2.852824  | -1.088546 |
| C | 1.123764  | 5.605324  | -2.413306 |
| H | 2.484029  | 4.973633  | -0.871665 |
| C | -0.120710 | 5.419208  | -3.015191 |
| H | -1.955211 | 4.276796  | -2.995087 |
| H | 1.799894  | 6.380425  | -2.781550 |
| H | -0.422820 | 6.045614  | -3.857632 |
| C | 1.521478  | 3.657667  | 1.592811  |
| H | 0.667218  | 4.352567  | 1.823920  |
| H | 2.344294  | 4.358964  | 1.279167  |
| O | 1.856829  | 2.815771  | 2.577857  |
| C | -2.759904 | -0.950397 | 0.676063  |
| H | -3.089344 | -0.083281 | 1.248136  |
| C | -3.621030 | -1.534397 | -0.255738 |
| H | -3.303645 | -2.502115 | -0.656089 |
| C | -5.093899 | -1.363523 | -0.182947 |
| C | -5.930903 | -2.379796 | -0.664608 |
| C | -5.689768 | -0.206924 | 0.344393  |
| C | -7.318616 | -2.254809 | -0.609417 |
| H | -5.485041 | -3.284751 | -1.086327 |
| C | -7.074943 | -0.080233 | 0.399231  |
| H | -5.063913 | 0.611548  | 0.707030  |
| C | -7.897233 | -1.104394 | -0.075391 |
| H | -7.950903 | -3.062116 | -0.985964 |
| H | -7.517892 | 0.827932  | 0.814382  |
| H | -8.983668 | -1.002384 | -0.030789 |
| C | 0.874567  | -4.178626 | -2.311660 |
| H | 0.132022  | -3.510303 | -2.770151 |
| H | 1.150720  | -4.950875 | -3.043386 |
| H | 0.382590  | -4.685262 | -1.465133 |
| C | 5.750416  | -4.031449 | -0.978350 |
| H | 5.939586  | -4.212929 | 0.091657  |
| H | 5.785254  | -5.001167 | -1.493207 |
| H | 6.577540  | -3.411393 | -1.354299 |
| H | 5.142107  | -1.463507 | -0.437551 |
| H | 1.010699  | -1.559127 | -1.686902 |
| C | -0.873992 | 0.187641  | -2.124527 |
| H | -0.175910 | 0.708303  | -2.780324 |
| C | -2.072513 | -0.184683 | -2.293638 |
| C | -3.360159 | -0.618330 | -2.197111 |
| H | -3.658661 | -1.505534 | -2.764206 |
| H | -4.135918 | 0.146132  | -2.092283 |

83

Figure\_S15-3\_PA-9d(Na)-ts(1,6minor)\_05 / electronic energy: -3681.01376311 a.u. / lowest freq: -473.62 cm<sup>-1</sup>

|    |           |           |           |
|----|-----------|-----------|-----------|
| C  | 3.467157  | 2.234121  | -0.207720 |
| H  | 3.823530  | 2.761035  | 0.685588  |
| C  | 4.092216  | 0.849702  | -0.369090 |
| H  | 4.818372  | 0.798674  | -1.191509 |
| C  | 1.761709  | 0.656308  | -0.361984 |
| C  | 3.047080  | -1.349513 | -0.983829 |
| C  | 4.276745  | -1.998615 | -0.831222 |
| C  | 1.960255  | -2.064609 | -1.505204 |
| C  | 4.421690  | -3.348863 | -1.175601 |
| C  | 2.078438  | -3.413686 | -1.829588 |
| C  | 3.317677  | -4.045843 | -1.667530 |
| H  | 3.422564  | -5.101902 | -1.931661 |
| Cu | -0.077008 | -0.112204 | -0.280774 |
| N  | 2.047094  | 1.914761  | -0.075060 |
| N  | 2.921980  | 0.009456  | -0.643146 |
| C  | -1.430371 | -1.378147 | 0.794999  |
| C  | -0.391201 | -0.904602 | 1.669535  |
| Na | 2.228310  | 0.849393  | 3.270431  |
| H  | 4.591691  | 0.514404  | 0.554954  |
| H  | 3.631982  | 2.871317  | -1.090877 |
| H  | -1.187785 | -2.316842 | 0.284012  |
| C  | 0.806352  | -1.724227 | 1.910179  |
| C  | -0.577028 | 0.225778  | 2.598600  |
| O  | 0.708049  | -2.965717 | 1.428231  |
| O  | 1.827462  | -1.341067 | 2.462369  |
| O  | -0.043360 | 0.333546  | 3.687149  |
| O  | -1.393579 | 1.175559  | 2.131418  |
| C  | -1.501949 | 2.359035  | 2.920886  |
| H  | -1.992327 | 2.142183  | 3.880216  |
| H  | -2.114634 | 3.051453  | 2.333228  |
| H  | -0.495099 | 2.768259  | 3.095539  |
| C  | 1.855015  | -3.793786 | 1.547190  |
| H  | 2.731593  | -3.317605 | 1.087972  |
| H  | 1.616217  | -4.723161 | 1.019293  |
| H  | 2.068115  | -4.004764 | 2.604805  |
| C  | 1.052873  | 2.913067  | 0.313195  |
| H  | 0.169933  | 2.326951  | 0.603531  |
| C  | 0.661643  | 3.803541  | -0.847199 |
| C  | -0.587758 | 3.632746  | -1.456879 |
| C  | 1.510285  | 4.805891  | -1.337262 |
| C  | -0.977727 | 4.430277  | -2.531945 |



|   |           |           |           |
|---|-----------|-----------|-----------|
| H | -1.259749 | 2.852816  | -1.088561 |
| C | 1.123838  | 5.605264  | -2.413359 |
| H | 2.484083  | 4.973593  | -0.871692 |
| C | -0.120633 | 5.419146  | -3.015252 |
| H | -1.955145 | 4.276752  | -2.995139 |
| H | 1.799978  | 6.380351  | -2.781612 |
| H | -0.422729 | 6.045536  | -3.857709 |
| C | 1.521504  | 3.657683  | 1.592800  |
| H | 0.667246  | 4.352592  | 1.823893  |
| H | 2.344324  | 4.358970  | 1.279148  |
| O | 1.856845  | 2.815804  | 2.577864  |
| C | -2.759913 | -0.950370 | 0.676069  |
| H | -3.089348 | -0.083249 | 1.248136  |
| C | -3.621043 | -1.534374 | -0.255725 |
| H | -3.303666 | -2.502097 | -0.656067 |
| C | -5.093911 | -1.363488 | -0.182935 |
| C | -5.930923 | -2.379761 | -0.664581 |
| C | -5.689771 | -0.206877 | 0.344390  |
| C | -7.318636 | -2.254762 | -0.609390 |
| H | -5.485068 | -3.284726 | -1.086288 |
| C | -7.074945 | -0.080174 | 0.399226  |
| H | -5.063910 | 0.611595  | 0.707014  |
| C | -7.897243 | -1.104336 | -0.075380 |
| H | -7.950930 | -3.062070 | -0.985926 |
| H | -7.517887 | 0.828000  | 0.814364  |
| H | -8.983677 | -1.002316 | -0.030779 |
| C | 0.874518  | -4.178628 | -2.311656 |
| H | 0.131970  | -3.510294 | -2.770127 |
| H | 1.150660  | -4.950864 | -3.043399 |
| H | 0.382548  | -4.685278 | -1.465134 |
| C | 5.750366  | -4.031509 | -0.978339 |
| H | 5.939527  | -4.212998 | 0.091667  |
| H | 5.785196  | -5.001224 | -1.493203 |
| H | 6.577499  | -3.411459 | -1.354279 |
| H | 5.142088  | -1.463559 | -0.437543 |
| H | 1.010681  | -1.559129 | -1.686900 |
| C | -0.874005 | 0.187652  | -2.124527 |
| H | -0.175927 | 0.708324  | -2.780322 |
| C | -2.072524 | -0.184679 | -2.293638 |
| C | -3.360169 | -0.618328 | -2.197109 |
| H | -3.658669 | -1.505536 | -2.764199 |
| H | -4.135929 | 0.146134  | -2.092287 |

83

Figure\_S15-3\_PA-9d(Na)-ts(1,6minor)\_06 / electronic energy: -3681.01280902 a.u. / lowest freq: -467.72 cm-1

|    |           |           |           |
|----|-----------|-----------|-----------|
| C  | 3.454210  | 2.248473  | -0.020989 |
| H  | 3.717559  | 2.681652  | 0.952092  |
| C  | 4.091862  | 0.876637  | -0.253873 |
| H  | 4.810804  | 0.870579  | -1.085060 |
| C  | 1.760653  | 0.672922  | -0.340425 |
| C  | 3.072108  | -1.324012 | -0.915390 |
| C  | 4.312458  | -1.961150 | -0.768866 |
| C  | 1.994837  | -2.047369 | -1.437355 |
| C  | 4.470555  | -3.305910 | -1.115654 |
| C  | 2.126786  | -3.397621 | -1.764040 |
| C  | 3.369497  | -4.015975 | -1.604741 |
| H  | 3.485540  | -5.071251 | -1.867954 |
| Cu | -0.083289 | -0.078642 | -0.285964 |
| N  | 2.024762  | 1.932170  | -0.036981 |
| N  | 2.932813  | 0.029615  | -0.558511 |
| C  | -1.402059 | -1.372076 | 0.808222  |
| C  | -0.377539 | -0.854787 | 1.674960  |
| Na | 2.209413  | 1.018906  | 3.229120  |
| H  | 4.606209  | 0.505364  | 0.646648  |
| H  | 3.701753  | 2.973962  | -0.810991 |
| H  | -1.126735 | -2.304649 | 0.302301  |
| C  | 0.839858  | -1.639020 | 1.936482  |
| C  | -0.589718 | 0.293201  | 2.575573  |
| O  | 0.764285  | -2.898206 | 1.499287  |
| O  | 1.854621  | -1.214188 | 2.469385  |
| O  | -0.044029 | 0.450666  | 3.652222  |
| O  | -1.442421 | 1.203589  | 2.094051  |
| C  | -1.574132 | 2.406277  | 2.849943  |
| H  | -2.042340 | 2.204187  | 3.823376  |
| H  | -2.216960 | 3.062132  | 2.252645  |
| H  | -0.578207 | 2.851848  | 2.998132  |
| C  | 1.924108  | -3.703537 | 1.646202  |
| H  | 2.797112  | -3.223171 | 1.184992  |
| H  | 1.705682  | -4.648506 | 1.137543  |
| H  | 2.130783  | -3.887242 | 2.710238  |
| C  | 1.006194  | 2.926076  | 0.262499  |
| H  | 0.123134  | 2.356285  | 0.590352  |
| C  | 0.611778  | 3.743672  | -0.951756 |
| C  | 1.208559  | 3.574377  | -2.206362 |
| C  | -0.413398 | 4.693622  | -0.831904 |
| C  | 0.809596  | 4.340783  | -3.302519 |
| H  | 1.985600  | 2.819960  | -2.343786 |
| C  | -0.813833 | 5.460603  | -1.923863 |
| H  | -0.916082 | 4.825861  | 0.129063  |
| C  | -0.199993 | 5.291200  | -3.165623 |

|   |           |           |           |
|---|-----------|-----------|-----------|
| H | 1.290758  | 4.187774  | -4.271330 |
| H | -1.615880 | 6.192916  | -1.805381 |
| H | -0.514381 | 5.890435  | -4.022980 |
| C | 1.466084  | 3.763870  | 1.497457  |
| H | 0.614957  | 4.464885  | 1.702248  |
| H | 2.278596  | 4.446244  | 1.116803  |
| O | 1.814479  | 2.989335  | 2.531888  |
| C | -2.746569 | -0.994926 | 0.689120  |
| H | -3.108922 | -0.141512 | 1.262223  |
| C | -3.580568 | -1.606369 | -0.248315 |
| H | -3.218913 | -2.552287 | -0.663237 |
| C | -5.059150 | -1.499428 | -0.183879 |
| C | -5.847500 | -2.539475 | -0.696337 |
| C | -5.708967 | -0.383226 | 0.366425  |
| C | -7.239681 | -2.476389 | -0.650226 |
| H | -5.359721 | -3.414065 | -1.135303 |
| C | -7.098864 | -0.318346 | 0.412197  |
| H | -5.123026 | 0.452631  | 0.754881  |
| C | -7.871992 | -1.365459 | -0.093860 |
| H | -7.832736 | -3.301361 | -1.051439 |
| H | -7.583701 | 0.559650  | 0.845008  |
| H | -8.962194 | -1.311910 | -0.056488 |
| C | 0.924458  | -4.167655 | -2.242203 |
| H | 0.260624  | -3.536542 | -2.850508 |
| H | 1.213364  | -5.046086 | -2.835872 |
| H | 0.336246  | -4.525233 | -1.381169 |
| C | 5.801478  | -3.991223 | -0.943179 |
| H | 5.745308  | -4.762057 | -0.158792 |
| H | 6.109253  | -4.495519 | -1.871357 |
| H | 6.590301  | -3.280582 | -0.661429 |
| H | 5.172486  | -1.417322 | -0.376858 |
| H | 1.038018  | -1.553502 | -1.614880 |
| C | -0.899273 | 0.266304  | -2.104641 |
| H | -0.232896 | 0.842369  | -2.747370 |
| C | -2.083203 | -0.151776 | -2.271037 |
| C | -3.351213 | -0.640247 | -2.183393 |
| H | -3.615703 | -1.525508 | -2.770242 |
| H | -4.156948 | 0.087890  | -2.051626 |

83

Figure\_S15-3\_PA-9d(Na)-ts(1,6minor)\_07 / electronic energy: -3681.01290228 a.u. / lowest freq: -467.74 cm-1

|    |           |           |           |
|----|-----------|-----------|-----------|
| C  | 3.458394  | 2.241642  | -0.019233 |
| H  | 3.722184  | 2.674788  | 0.953728  |
| C  | 4.093124  | 0.868384  | -0.251398 |
| H  | 4.814613  | 0.860942  | -1.080365 |
| C  | 1.761716  | 0.670062  | -0.341717 |
| C  | 3.070674  | -1.328938 | -0.916270 |
| C  | 4.305939  | -1.968659 | -0.771445 |
| C  | 1.988234  | -2.049781 | -1.439612 |
| C  | 4.459493  | -3.317107 | -1.119987 |
| C  | 2.114992  | -3.396913 | -1.767370 |
| C  | 3.358890  | -4.021226 | -1.608795 |
| H  | 3.470177  | -5.076122 | -1.874856 |
| Cu | -0.083740 | -0.078358 | -0.287088 |
| N  | 2.028284  | 1.928223  | -0.035903 |
| N  | 2.932882  | 0.024890  | -0.560239 |
| C  | -1.403249 | -1.370186 | 0.809094  |
| C  | -0.377592 | -0.853311 | 1.674698  |
| Na | 2.212273  | 1.018140  | 3.228094  |
| H  | 4.603596  | 0.494473  | 0.650331  |
| H  | 3.707780  | 2.966212  | -0.809521 |
| H  | -1.129310 | -2.303472 | 0.303718  |
| C  | 0.839305  | -1.638463 | 1.935841  |
| C  | -0.588100 | 0.295199  | 2.575062  |
| O  | 0.762110  | -2.897930 | 1.499989  |
| O  | 1.855054  | -1.213911 | 2.467176  |
| O  | -0.041891 | 0.452205  | 3.651511  |
| O  | -1.439855 | 1.206478  | 2.093575  |
| C  | -1.570147 | 2.409474  | 2.849243  |
| H  | -2.038030 | 2.208012  | 3.822961  |
| H  | -2.212737 | 3.065706  | 2.252106  |
| H  | -0.573770 | 2.854255  | 2.996817  |
| C  | 1.921485  | -3.704102 | 1.645595  |
| H  | 2.794235  | -3.224484 | 1.183108  |
| H  | 1.701804  | -4.649097 | 1.137518  |
| H  | 2.129422  | -3.887715 | 2.709398  |
| C  | 1.011382  | 2.924269  | 0.262315  |
| H  | 0.127352  | 2.356465  | 0.590936  |
| C  | 0.618236  | 3.741012  | -0.952912 |
| C  | 1.215944  | 3.570760  | -2.206938 |
| C  | -0.406736 | 4.691340  | -0.834411 |
| C  | 0.818004  | 4.336596  | -3.303876 |
| H  | 1.992879  | 2.816048  | -2.343341 |
| C  | -0.806145 | 5.457750  | -1.927141 |
| H  | -0.910025 | 4.824293  | 0.126148  |
| C  | -0.191432 | 5.287371  | -3.168337 |
| H  | 1.299835  | 4.182847  | -4.272237 |
| H  | -1.608078 | 6.190357  | -1.809734 |
| H  | -0.505026 | 5.886115  | -4.026329 |
| C  | 1.472619  | 3.762925  | 1.496141  |

|   |           |           |           |
|---|-----------|-----------|-----------|
| H | 0.622823  | 4.465951  | 1.699591  |
| H | 2.286589  | 4.443117  | 1.114692  |
| O | 1.819191  | 2.989256  | 2.531840  |
| C | -2.747272 | -0.991250 | 0.690317  |
| H | -3.108076 | -0.136742 | 1.262764  |
| C | -3.582742 | -1.602448 | -0.245999 |
| H | -3.222795 | -2.549409 | -0.660031 |
| C | -5.061121 | -1.493040 | -0.180891 |
| C | -5.851460 | -2.532407 | -0.691648 |
| C | -5.708793 | -0.375006 | 0.368213  |
| C | -7.243515 | -2.466864 | -0.645085 |
| H | -5.365348 | -3.408387 | -1.129687 |
| C | -7.098557 | -0.307670 | 0.414421  |
| H | -5.121245 | 0.460372  | 0.755276  |
| C | -7.873692 | -1.354102 | -0.089965 |
| H | -7.838166 | -3.291325 | -1.044984 |
| H | -7.581727 | 0.571732  | 0.846239  |
| H | -8.963783 | -1.298582 | -0.052277 |
| C | 0.914949  | -4.168774 | -2.248156 |
| H | 0.167447  | -3.504302 | -2.704240 |
| H | 1.194377  | -4.938243 | -2.981555 |
| H | 0.428090  | -4.679583 | -1.401222 |
| C | 5.794236  | -3.989873 | -0.929985 |
| H | 5.990194  | -4.170571 | 0.138921  |
| H | 5.833815  | -4.958920 | -1.445734 |
| H | 6.614601  | -3.363173 | -1.309721 |
| H | 5.169196  | -1.429150 | -0.379682 |
| H | 1.033918  | -1.551255 | -1.616767 |
| C | -0.900377 | 0.265306  | -2.105689 |
| H | -0.233622 | 0.839686  | -2.749540 |
| C | -2.084765 | -0.151920 | -2.271115 |
| C | -3.353222 | -0.639030 | -2.182361 |
| H | -3.618761 | -1.524796 | -2.767963 |
| H | -4.158181 | 0.090091  | -2.051333 |

83

Figure\_S15-3\_PA-9d(Na)-ts(1,6minor)\_08 / electronic energy: -3681.00936876 a.u. / lowest freq: -472.77 cm-1

|    |           |           |           |
|----|-----------|-----------|-----------|
| C  | 2.502018  | 3.100931  | -0.504259 |
| H  | 2.746811  | 3.774759  | 0.325993  |
| C  | 3.576236  | 2.039625  | -0.739346 |
| H  | 4.156567  | 2.209220  | -1.656197 |
| C  | 1.503041  | 0.999474  | -0.430097 |
| C  | 3.371964  | -0.433903 | -1.141443 |
| C  | 4.762872  | -0.585326 | -1.045419 |
| C  | 2.595133  | -1.522980 | -1.543645 |
| C  | 5.366519  | -1.816057 | -1.311793 |
| C  | 3.177267  | -2.767996 | -1.793355 |
| C  | 4.562677  | -2.902580 | -1.675452 |
| H  | 5.028938  | -3.871215 | -1.876568 |
| Cu | 0.008741  | -0.311470 | -0.325819 |
| N  | 1.330505  | 2.287374  | -0.185672 |
| N  | 2.782423  | 0.809180  | -0.840363 |
| C  | -1.104178 | -1.849611 | 0.653150  |
| C  | -0.064191 | -1.351486 | 1.514772  |
| Na | 2.252280  | 0.934169  | 2.838631  |
| H  | 4.279270  | 1.974871  | 0.107522  |
| H  | 2.305094  | 3.706394  | -1.403023 |
| H  | -0.793245 | -2.725122 | 0.070272  |
| C  | 1.195575  | -2.128633 | 1.498864  |
| C  | -0.293122 | -0.412072 | 2.620210  |
| O  | 2.266720  | -1.449630 | 1.963935  |
| O  | 1.312732  | -3.250640 | 1.056610  |
| O  | 0.420828  | -0.302790 | 3.604902  |
| O  | -1.376751 | 0.351274  | 2.467414  |
| C  | -1.593702 | 1.353239  | 3.460953  |
| H  | -1.769600 | 0.890746  | 4.442256  |
| H  | -2.486946 | 1.899617  | 3.138370  |
| H  | -0.711303 | 2.012098  | 3.498201  |
| C  | 3.502785  | -2.152782 | 1.974713  |
| H  | 3.449138  | -3.022185 | 2.644882  |
| H  | 4.252080  | -1.442193 | 2.343065  |
| H  | 3.768491  | -2.487818 | 0.963503  |
| C  | 0.125107  | 2.845726  | 0.418854  |
| H  | -0.477032 | 1.967685  | 0.695017  |
| C  | -0.673813 | 3.677721  | -0.560080 |
| C  | -0.280742 | 4.969790  | -0.934449 |
| C  | -1.847853 | 3.151271  | -1.114048 |
| C  | -1.037977 | 5.710894  | -1.842115 |
| H  | 0.623838  | 5.410621  | -0.509320 |
| C  | -2.606876 | 3.888985  | -2.020936 |
| H  | -2.161245 | 2.140511  | -0.839059 |
| C  | -2.203100 | 5.172900  | -2.388576 |
| H  | -0.716618 | 6.717216  | -2.120787 |
| H  | -3.516987 | 3.457479  | -2.443955 |
| H  | -2.796478 | 5.754529  | -3.097650 |
| C  | 0.487198  | 3.545262  | 1.759111  |
| H  | -0.508137 | 3.878182  | 2.162840  |
| H  | 0.999269  | 4.512842  | 1.502517  |
| O  | 1.191684  | 2.747482  | 2.573597  |
| C  | -2.468755 | -1.531266 | 0.590991  |

|   |           |           |           |
|---|-----------|-----------|-----------|
| H | -2.852794 | -0.724908 | 1.213925  |
| C | -3.307632 | -2.156902 | -0.336258 |
| H | -2.933342 | -3.092325 | -0.762219 |
| C | -4.786477 | -2.090919 | -0.223594 |
| C | -5.563186 | -3.158751 | -0.694516 |
| C | -5.447162 | -0.981056 | 0.326818  |
| C | -6.954683 | -3.128623 | -0.607431 |
| H | -5.067133 | -4.028518 | -1.133754 |
| C | -6.836214 | -0.949215 | 0.413627  |
| H | -4.870097 | -0.123479 | 0.680197  |
| C | -7.597672 | -2.023839 | -0.051138 |
| H | -7.538713 | -3.974560 | -0.977032 |
| H | -7.329779 | -0.075413 | 0.845131  |
| H | -8.687305 | -1.996342 | 0.017980  |
| C | 2.299920  | -3.937447 | -2.148176 |
| H | 1.522718  | -3.647561 | -2.870441 |
| H | 2.879527  | -4.768117 | -2.573505 |
| H | 1.790237  | -4.297291 | -1.241016 |
| C | 6.858248  | -1.984840 | -1.182479 |
| H | 7.104735  | -2.642149 | -0.333818 |
| H | 7.283770  | -2.448946 | -2.084634 |
| H | 7.363106  | -1.022423 | -1.021721 |
| H | 5.392835  | 0.255326  | -0.751601 |
| H | 1.518775  | -1.407199 | -1.682952 |
| C | -0.793980 | -0.119188 | -2.188711 |
| H | -0.158710 | 0.485543  | -2.836067 |
| C | -1.935413 | -0.634680 | -2.372314 |
| C | -3.164423 | -1.213333 | -2.274285 |
| H | -3.362391 | -2.128983 | -2.839737 |
| H | -4.020565 | -0.539557 | -2.171108 |

83

Figure\_S15-3\_PA-9d(Na)-ts(1,6minor)\_09 / electronic energy: -3681.00528804 a.u. / lowest freq: -436.29 cm-1

|    |           |           |           |
|----|-----------|-----------|-----------|
| C  | 1.471229  | -2.756206 | 2.248800  |
| H  | 1.805684  | -3.677320 | 1.748967  |
| C  | 2.618716  | -1.814845 | 2.602633  |
| H  | 2.444430  | -1.303257 | 3.563410  |
| C  | 1.402216  | -0.920114 | 0.819671  |
| C  | 3.542002  | 0.161591  | 1.345788  |
| C  | 3.748732  | 0.771624  | 0.103633  |
| C  | 4.306136  | 0.560552  | 2.447764  |
| C  | 4.666915  | 1.816172  | -0.027558 |
| C  | 5.246715  | 1.587730  | 2.329757  |
| C  | 5.407959  | 2.212716  | 1.090586  |
| H  | 6.136334  | 3.022105  | 0.989705  |
| Cu | 0.516807  | 0.433567  | -0.338649 |
| N  | 0.723011  | -1.960386 | 1.275066  |
| N  | 2.573315  | -0.849576 | 1.497356  |
| C  | -0.734526 | 1.097056  | -1.871586 |
| C  | -0.093036 | -0.111222 | -2.347045 |
| H  | 3.595379  | -2.314898 | 2.648003  |
| H  | 0.845561  | -3.014331 | 3.114036  |
| H  | -0.305346 | 2.035821  | -2.234207 |
| C  | 1.222218  | -0.010812 | -3.006503 |
| C  | -0.803225 | -1.378362 | -2.578177 |
| O  | 1.539646  | 1.237455  | -3.373991 |
| O  | 1.995022  | -0.935450 | -3.202652 |
| O  | -0.339200 | -2.369346 | -3.118324 |
| O  | -2.076878 | -1.365890 | -2.171322 |
| C  | -2.841286 | -2.538538 | -2.402000 |
| H  | -2.968038 | -2.716832 | -3.478938 |
| H  | -3.815065 | -2.359284 | -1.933420 |
| H  | -2.356526 | -3.414953 | -1.950069 |
| C  | 2.760801  | 1.407252  | -4.076742 |
| H  | 3.598354  | 0.951583  | -3.533420 |
| H  | 2.912827  | 2.487511  | -4.173339 |
| H  | 2.695250  | 0.947579  | -5.073362 |
| C  | -0.519120 | -2.443071 | 0.701745  |
| H  | -0.637305 | -1.884716 | -0.235961 |
| C  | -1.721753 | -2.106866 | 1.566076  |
| C  | -2.970963 | -2.687923 | 1.304517  |
| C  | -1.642951 | -1.149831 | 2.586405  |
| C  | -4.098725 | -2.330533 | 2.042575  |
| H  | -3.070048 | -3.426852 | 0.507908  |
| C  | -2.769203 | -0.791281 | 3.327295  |
| H  | -0.688360 | -0.664034 | 2.797228  |
| C  | -4.003140 | -1.382539 | 3.061250  |
| H  | -5.060118 | -2.798379 | 1.818592  |
| H  | -2.680445 | -0.037927 | 4.113317  |
| H  | -4.886326 | -1.102992 | 3.640127  |
| C  | -0.318931 | -3.938659 | 0.290013  |
| H  | -1.269368 | -4.232538 | -0.227963 |
| H  | -0.356521 | -4.525314 | 1.253077  |
| O  | 0.792782  | -4.111970 | -0.435167 |
| C  | -1.932899 | 1.188429  | -1.141429 |
| H  | -2.377025 | 0.273671  | -0.751339 |
| C  | -2.552026 | 2.404386  | -0.850203 |
| H  | -2.304471 | 3.251222  | -1.494318 |
| C  | -3.911755 | 2.435323  | -0.262319 |
| C  | -4.790596 | 3.476007  | -0.592206 |

|    |           |           |           |
|----|-----------|-----------|-----------|
| C  | -4.351701 | 1.447813  | 0.635161  |
| C  | -6.077353 | 3.524054  | -0.056665 |
| H  | -4.461347 | 4.255775  | -1.284272 |
| C  | -5.634649 | 1.497543  | 1.171513  |
| H  | -3.678436 | 0.641602  | 0.938216  |
| C  | -6.505623 | 2.534016  | 0.826673  |
| H  | -6.749167 | 4.340167  | -0.332361 |
| H  | -5.953293 | 0.721372  | 1.871205  |
| H  | -7.511199 | 2.571974  | 1.251202  |
| C  | 0.671747  | 2.091141  | 0.850927  |
| H  | 1.626962  | 2.063122  | 1.376623  |
| C  | -0.316608 | 2.878046  | 0.917095  |
| C  | -1.522820 | 3.489040  | 0.801613  |
| H  | -1.586706 | 4.464159  | 0.310612  |
| H  | -2.268087 | 3.303496  | 1.580549  |
| Na | 1.643263  | -3.072449 | -2.115759 |
| H  | 4.164141  | 0.083752  | 3.418792  |
| H  | 3.192129  | 0.420188  | -0.768296 |
| C  | 6.036717  | 2.030918  | 3.533712  |
| H  | 6.930092  | 2.599874  | 3.241627  |
| H  | 5.425420  | 2.679301  | 4.181674  |
| H  | 6.356917  | 1.171596  | 4.140635  |
| C  | 4.860613  | 2.490914  | -1.359380 |
| H  | 3.906824  | 2.885955  | -1.740142 |
| H  | 5.571651  | 3.324894  | -1.287588 |
| H  | 5.247693  | 1.782629  | -2.107982 |

51

Figure\_S15-4\_9b(Na)-Cu-allenyl / electronic energy: -2839.05552233 a.u. / lowest freq: 18.49 cm-1

|    |           |           |           |
|----|-----------|-----------|-----------|
| C  | -1.403505 | -1.447218 | -1.463778 |
| H  | -1.518968 | -0.926587 | -2.428424 |
| C  | -0.102320 | -2.249278 | -1.398621 |
| H  | -0.227521 | -3.213821 | -0.877881 |
| C  | 0.053653  | -0.375990 | -0.006245 |
| C  | 2.115590  | -1.646329 | -0.323692 |
| C  | 2.447529  | -2.278240 | 0.886897  |
| C  | 3.093354  | -1.289872 | -1.267445 |
| C  | 3.794134  | -2.560894 | 1.135970  |
| C  | 4.427961  | -1.594447 | -0.983886 |
| C  | 4.776145  | -2.227614 | 0.206801  |
| H  | 5.823692  | -2.456465 | 0.414766  |
| Cu | 0.843286  | 1.028000  | 1.058904  |
| N  | -1.218234 | -0.464888 | -0.392885 |
| N  | 0.750379  | -1.356185 | -0.608944 |
| Na | 0.955612  | 3.102468  | -1.264571 |
| H  | 0.329842  | -2.451327 | -2.388040 |
| H  | -2.298582 | -2.059781 | -1.291665 |
| C  | -2.190235 | 0.595041  | -0.173375 |
| H  | -1.850072 | 1.110871  | 0.740288  |
| C  | -3.556987 | -0.008997 | 0.105143  |
| C  | -4.706885 | 0.356784  | -0.601576 |
| C  | -3.677253 | -0.973578 | 1.116074  |
| C  | -5.942423 | -0.224050 | -0.305173 |
| H  | -4.649878 | 1.103012  | -1.395225 |
| C  | -4.905862 | -1.557315 | 1.412344  |
| H  | -2.783955 | -1.272241 | 1.671962  |
| C  | -6.047178 | -1.182627 | 0.699889  |
| H  | -6.828698 | 0.076027  | -0.869206 |
| H  | -4.975116 | -2.307462 | 2.203595  |
| H  | -7.013189 | -1.638603 | 0.927875  |
| C  | -2.105561 | 1.652949  | -1.307432 |
| H  | -2.876323 | 2.421016  | -1.032266 |
| H  | -2.526837 | 1.167141  | -2.231630 |
| O  | -0.866029 | 2.140611  | -1.461517 |
| C  | 1.722811  | 2.492968  | 1.972660  |
| H  | 1.936525  | 2.461721  | 3.053521  |
| C  | 2.118112  | 3.566313  | 1.350898  |
| C  | 2.487290  | 4.627547  | 0.641169  |
| H  | 1.831345  | 5.500129  | 0.544963  |
| H  | 3.482307  | 4.692597  | 0.187595  |
| H  | 5.202845  | -1.322373 | -1.704686 |
| H  | 4.072439  | -3.050469 | 2.072400  |
| C  | 1.385066  | -2.604535 | 1.901717  |
| H  | 0.998593  | -1.681347 | 2.362588  |
| H  | 0.524948  | -3.114869 | 1.443881  |
| H  | 1.783860  | -3.245588 | 2.698815  |
| C  | 2.712511  | -0.567453 | -2.531971 |
| H  | 2.063535  | -1.181523 | -3.174815 |
| H  | 2.155428  | 0.354222  | -2.305548 |
| H  | 3.604292  | -0.299794 | -3.114044 |

83

Figure\_S15-4\_PA-9b(Na)-ts(1,6major)\_01 / electronic energy: -3681.01420703 a.u. / lowest freq: -427.03 cm-1

|   |          |           |          |
|---|----------|-----------|----------|
| C | 2.979277 | -1.816363 | 1.363890 |
| H | 2.832953 | -2.499901 | 2.202407 |
| C | 0.983754 | -0.583498 | 2.061507 |
| H | 0.687994 | -1.482945 | 2.607573 |
| C | 2.204575 | -0.653459 | 1.365698 |
| H | 2.532869 | 0.207846  | 0.781962 |
| C | 0.132807 | 0.567981  | 2.261009 |
| C | 0.555516 | 1.959815  | 2.064348 |

|    |           |           |           |
|----|-----------|-----------|-----------|
| O  | -0.178914 | 2.937010  | 2.048099  |
| C  | -1.162905 | 0.359582  | 2.919903  |
| O  | -1.901175 | 1.216398  | 3.376497  |
| O  | -1.517300 | -0.936671 | 2.962522  |
| C  | 4.329569  | -1.851716 | 0.760541  |
| C  | 4.682883  | -1.022138 | -0.315747 |
| C  | 5.957777  | -1.080815 | -0.871037 |
| C  | 6.907086  | -1.972887 | -0.367128 |
| C  | 6.566688  | -2.806274 | 0.698073  |
| C  | 5.289634  | -2.746887 | 1.253825  |
| C  | 2.069231  | -3.442207 | 0.102650  |
| H  | 2.261290  | -4.216338 | 0.850501  |
| H  | 2.774336  | -3.409537 | -0.733773 |
| C  | 0.793982  | -3.030186 | -0.121012 |
| C  | -0.269149 | -2.357956 | -0.241579 |
| H  | -1.246278 | -2.540213 | -0.691663 |
| Cu | -0.175462 | -0.401482 | 0.359787  |
| C  | -1.144033 | 0.599950  | -1.032719 |
| N  | -2.457990 | 0.509661  | -1.204986 |
| N  | -0.638672 | 1.394818  | -1.990384 |
| C  | -3.354623 | -0.132049 | -0.259882 |
| C  | -2.947832 | 1.409435  | -2.255697 |
| H  | -3.435672 | 2.267963  | -1.769538 |
| C  | -1.652843 | 1.791478  | -2.974419 |
| H  | -1.504971 | 1.230046  | -3.912538 |
| C  | 0.743914  | 1.707881  | -2.131227 |
| C  | 1.624394  | 0.753087  | -2.667616 |
| C  | 1.181826  | 2.986763  | -1.742460 |
| C  | 2.976709  | 1.094986  | -2.779816 |
| C  | 2.540838  | 3.287647  | -1.871490 |
| C  | 3.433983  | 2.346862  | -2.378552 |
| H  | 4.493435  | 2.594870  | -2.472863 |
| Na | -2.500038 | 2.928818  | 1.919630  |
| H  | -1.592203 | 2.862329  | -3.208512 |
| H  | -3.670790 | 0.907902  | -2.913030 |
| O  | 1.874268  | 2.097145  | 1.908907  |
| C  | -2.790716 | -1.234933 | 3.511430  |
| H  | -2.834690 | -0.969064 | 4.576959  |
| H  | -2.929437 | -2.313857 | 3.385119  |
| H  | -3.580634 | -0.687293 | 2.976474  |
| C  | 2.385404  | 3.411637  | 1.760938  |
| H  | 1.910161  | 3.929061  | 0.918794  |
| H  | 3.458436  | 3.298031  | 1.573259  |
| H  | 2.222644  | 3.994940  | 2.678345  |
| H  | -2.747429 | -0.342183 | 0.636144  |
| C  | -3.895854 | -1.450235 | -0.775982 |
| C  | -4.702645 | -2.239439 | 0.057043  |
| C  | -3.597217 | -1.935173 | -2.054595 |
| C  | -5.205944 | -3.462897 | -0.379836 |
| H  | -4.928757 | -1.898010 | 1.069876  |
| C  | -4.099393 | -3.160548 | -2.495451 |
| H  | -2.943062 | -1.358256 | -2.711137 |
| C  | -4.909721 | -3.928399 | -1.661848 |
| H  | -5.829184 | -4.061357 | 0.288699  |
| H  | -3.849280 | -3.517918 | -3.497085 |
| H  | -5.302642 | -4.888063 | -2.004790 |
| C  | -4.448169 | 0.891868  | 0.192062  |
| H  | -5.064236 | 0.335170  | 0.947141  |
| H  | -5.144368 | 0.989581  | -0.689936 |
| O  | -3.925874 | 2.043648  | 0.626926  |
| H  | 5.029497  | -3.405910 | 2.086631  |
| H  | 3.948303  | -0.331158 | -0.735039 |
| H  | 7.300106  | -3.509664 | 1.099012  |
| H  | 6.211953  | -0.425913 | -1.708111 |
| H  | 7.905710  | -2.020504 | -0.806658 |
| C  | 1.138435  | -0.602947 | -3.100184 |
| H  | 0.985301  | -1.258390 | -2.229315 |
| H  | 0.174446  | -0.541526 | -3.625366 |
| H  | 1.866664  | -1.084682 | -3.766166 |
| C  | 0.208212  | 3.998497  | -1.199623 |
| H  | 0.728806  | 4.910812  | -0.878466 |
| H  | -0.532200 | 4.294608  | -1.957945 |
| H  | -0.343607 | 3.594945  | -0.338235 |
| H  | 3.677310  | 0.366478  | -3.195724 |
| H  | 2.901920  | 4.273721  | -1.568872 |

83

Figure\_S15-4\_PA-9b(Na)-ts(1,6major)\_02 / electronic energy: -3681.01281667 a.u. / lowest freq: -438.77 cm<sup>-1</sup>

|   |           |           |          |
|---|-----------|-----------|----------|
| C | -3.136864 | 1.752039  | 1.146068 |
| H | -2.969054 | 2.525961  | 1.898477 |
| C | -1.092165 | 0.652122  | 1.905771 |
| H | -0.831937 | 1.601341  | 2.381194 |
| C | -2.326981 | 0.617768  | 1.234324 |
| H | -2.634912 | -0.299287 | 0.732068 |
| C | -0.195573 | -0.445109 | 2.201877 |
| C | -0.568174 | -1.863059 | 2.117563 |
| O | 0.189118  | -2.815361 | 2.234520 |
| C | 1.071396  | -0.138875 | 2.879068 |
| O | 1.850366  | -0.935762 | 3.374180 |
| O | 1.348034  | 1.178388  | 2.895742 |

|    |           |           |           |
|----|-----------|-----------|-----------|
| C  | -4.523051 | 1.682059  | 0.630107  |
| C  | -4.909502 | 0.742204  | -0.338685 |
| C  | -6.219317 | 0.700864  | -0.807513 |
| C  | -7.172143 | 1.599444  | -0.321811 |
| C  | -6.799071 | 2.542392  | 0.635272  |
| C  | -5.486271 | 2.584382  | 1.103108  |
| C  | -2.363670 | 3.203924  | -0.356845 |
| H  | -2.598282 | 4.071375  | 0.266362  |
| H  | -3.076335 | 2.997032  | -1.161325 |
| C  | -1.066645 | 2.850668  | -0.551731 |
| C  | 0.044457  | 2.249612  | -0.605257 |
| H  | 0.985318  | 2.457955  | -1.115413 |
| Cu | 0.159590  | 0.403739  | 0.262646  |
| C  | 1.287883  | -0.608692 | -1.003521 |
| N  | 2.608071  | -0.544349 | -1.115927 |
| N  | 0.805189  | -1.361857 | -2.006138 |
| C  | 3.476379  | 0.049707  | -0.103478 |
| C  | 3.120833  | -1.409463 | -2.183190 |
| H  | 3.595303  | -2.286333 | -1.716339 |
| C  | 1.845495  | -1.763539 | -2.956124 |
| H  | 1.743853  | -1.188565 | -3.891844 |
| C  | -0.584019 | -1.622087 | -2.182538 |
| C  | -1.403567 | -0.680255 | -2.825182 |
| C  | -1.094667 | -2.834071 | -1.681104 |
| C  | -2.774619 | -0.953813 | -2.909313 |
| C  | -2.466220 | -3.071491 | -1.791718 |
| C  | -3.303152 | -2.131605 | -2.391706 |
| H  | -4.375937 | -2.324593 | -2.463846 |
| Na | 2.493226  | -2.803967 | 2.141518  |
| H  | 1.775384  | -2.831842 | -3.203347 |
| H  | 3.856258  | -0.885129 | -2.807152 |
| O  | -1.872240 | -2.057764 | 1.908017  |
| C  | 2.565352  | 1.567554  | 3.513579  |
| H  | 2.580426  | 1.275588  | 4.572888  |
| H  | 2.616081  | 2.657983  | 3.423028  |
| H  | 3.425952  | 1.108430  | 3.005108  |
| C  | -2.341147 | -3.395295 | 1.871325  |
| H  | -1.804194 | -3.983469 | 1.117184  |
| H  | -3.404580 | -3.334724 | 1.616075  |
| H  | -2.216652 | -3.876493 | 2.851860  |
| H  | 2.816657  | 0.242014  | 0.755198  |
| C  | 4.044436  | 1.378862  | -0.553782 |
| C  | 5.049997  | 1.469671  | -1.525983 |
| C  | 3.560061  | 2.565771  | 0.010940  |
| C  | 5.546997  | 2.710049  | -1.926227 |
| H  | 5.460107  | 0.562311  | -1.974865 |
| C  | 4.054475  | 3.807808  | -0.385546 |
| H  | 2.771592  | 2.512413  | 0.766465  |
| C  | 5.050704  | 3.883834  | -1.358711 |
| H  | 6.330181  | 2.759084  | -2.686223 |
| H  | 3.656889  | 4.719229  | 0.066803  |
| H  | 5.441109  | 4.854331  | -1.673184 |
| C  | 4.527763  | -0.988215 | 0.381749  |
| H  | 5.109539  | -0.431626 | 1.168336  |
| H  | 5.271751  | -1.098372 | -0.457739 |
| O  | 3.973787  | -2.140286 | 0.778977  |
| H  | -5.201011 | 3.328070  | 1.852040  |
| H  | -4.173011 | 0.045443  | -0.744225 |
| H  | -7.534494 | 3.252434  | 1.020518  |
| H  | -6.498503 | -0.037236 | -1.563194 |
| H  | -8.199062 | 1.566035  | -0.692214 |
| C  | -0.844341 | 0.565409  | -3.458122 |
| H  | 0.124223  | 0.849841  | -3.031748 |
| H  | -0.707525 | 0.409183  | -4.540402 |
| H  | -1.530972 | 1.412713  | -3.326548 |
| C  | -0.170702 | -3.842075 | -1.051947 |
| H  | -0.713944 | -4.757906 | -0.782270 |
| H  | 0.638942  | -4.127639 | -1.739638 |
| H  | 0.302271  | -3.441617 | -0.143120 |
| H  | -3.433088 | -0.226474 | -3.390955 |
| H  | -2.883501 | -4.003515 | -1.402791 |

83

Figure\_S15-4\_PA-9b(Na)-ts(1,6major)\_03 / electronic energy: -3681.01313518 a.u. / lowest freq: -434.70 cm-1

|    |           |           |           |
|----|-----------|-----------|-----------|
| C  | 2.999801  | -1.568701 | -2.158205 |
| H  | 3.481819  | -2.397870 | -1.617948 |
| C  | 1.707790  | -1.990629 | -2.863349 |
| H  | 1.587851  | -1.510973 | -3.849154 |
| C  | 1.193966  | -0.654899 | -1.016927 |
| C  | -0.696970 | -1.813894 | -2.048422 |
| C  | -1.150207 | -3.019646 | -1.483712 |
| C  | -1.563279 | -0.938771 | -2.724177 |
| C  | -2.513119 | -3.318671 | -1.568848 |
| C  | -2.919839 | -1.276342 | -2.789175 |
| C  | -3.393680 | -2.449352 | -2.208735 |
| H  | -4.456653 | -2.693889 | -2.266433 |
| Cu | 0.161058  | 0.450662  | 0.253023  |
| N  | 2.513094  | -0.602407 | -1.167146 |
| N  | 0.686970  | -1.493593 | -1.935964 |
| C  | -1.018405 | 0.792991  | 1.926617  |

|                                        |           |           |                                                                      |
|----------------------------------------|-----------|-----------|----------------------------------------------------------------------|
| C                                      | -0.146264 | -0.315380 | 2.247464                                                             |
| H                                      | 1.629569  | -3.077055 | -3.004998                                                            |
| H                                      | 3.720360  | -1.113029 | -2.849386                                                            |
| H                                      | -0.737297 | 1.751060  | 2.371407                                                             |
| C                                      | -0.559583 | -1.724430 | 2.222257                                                             |
| C                                      | 1.137551  | -0.020291 | 2.896525                                                             |
| O                                      | -1.874479 | -1.888852 | 2.060994                                                             |
| O                                      | 0.175729  | -2.692342 | 2.348618                                                             |
| O                                      | 1.895266  | -0.819682 | 3.420098                                                             |
| O                                      | 1.454715  | 1.286651  | 2.852517                                                             |
| C                                      | 2.693089  | 1.663107  | 3.434917                                                             |
| H                                      | 2.721829  | 1.405533  | 4.502770                                                             |
| H                                      | 2.770798  | 2.748286  | 3.307698                                                             |
| H                                      | 3.530947  | 1.164948  | 2.924988                                                             |
| C                                      | -2.378663 | -3.213822 | 2.073015                                                             |
| H                                      | -1.893501 | -3.829045 | 1.305410                                                             |
| H                                      | -3.450539 | -3.129573 | 1.864266                                                             |
| H                                      | -2.221940 | -3.680307 | 3.055986                                                             |
| C                                      | 3.402526  | 0.040935  | -0.203041                                                            |
| H                                      | 2.758336  | 0.294123  | 0.652011                                                             |
| C                                      | 3.995975  | 1.330279  | -0.727216                                                            |
| C                                      | 3.627540  | 2.549633  | -0.144870                                                            |
| C                                      | 4.928285  | 1.350865  | -1.773938                                                            |
| C                                      | 4.160611  | 3.756333  | -0.597212                                                            |
| H                                      | 2.896546  | 2.550767  | 0.667982                                                             |
| C                                      | 5.463125  | 2.555296  | -2.230644                                                            |
| H                                      | 5.251331  | 0.416464  | -2.237843                                                            |
| C                                      | 5.080335  | 3.762635  | -1.645420                                                            |
| H                                      | 3.852923  | 4.694549  | -0.129904                                                            |
| H                                      | 6.188274  | 2.549933  | -3.047680                                                            |
| H                                      | 5.499862  | 4.704817  | -2.005209                                                            |
| C                                      | 4.449893  | -0.980719 | 0.328433                                                             |
| H                                      | 5.043022  | -0.388187 | 1.079139                                                             |
| H                                      | 5.184369  | -1.136235 | -0.512704                                                            |
| O                                      | 3.893529  | -2.106996 | 0.789548                                                             |
| C                                      | -2.248744 | 0.760848  | 1.246634                                                             |
| H                                      | -2.561844 | -0.164831 | 0.762552                                                             |
| C                                      | -3.056405 | 1.895600  | 1.132577                                                             |
| H                                      | -2.924596 | 2.667337  | 1.893631                                                             |
| C                                      | -4.417181 | 1.814148  | 0.555408                                                             |
| C                                      | -5.415647 | 2.696894  | 0.990758                                                             |
| C                                      | -4.742527 | 0.877865  | -0.439038                                                            |
| C                                      | -6.704455 | 2.637139  | 0.462046                                                             |
| H                                      | -5.177870 | 3.438461  | 1.758146                                                             |
| C                                      | -6.028473 | 0.817961  | -0.967541                                                            |
| H                                      | -3.977819 | 0.196005  | -0.817096                                                            |
| C                                      | -7.017434 | 1.696106  | -0.518406                                                            |
| H                                      | -7.468423 | 3.331785  | 0.818606                                                             |
| H                                      | -6.259621 | 0.081344  | -1.740833                                                            |
| H                                      | -8.025651 | 1.648833  | -0.935616                                                            |
| C                                      | 0.133212  | 2.308082  | -0.609289                                                            |
| H                                      | 1.079177  | 2.463863  | -1.128519                                                            |
| C                                      | -0.940496 | 2.970889  | -0.528779                                                            |
| C                                      | -2.215986 | 3.383076  | -0.309584                                                            |
| H                                      | -2.399082 | 4.239462  | 0.345270                                                             |
| H                                      | -2.944858 | 3.240541  | -1.113348                                                            |
| Na                                     | 2.481379  | -2.736786 | 2.238966                                                             |
| C                                      | -0.184850 | -3.959390 | -0.812243                                                            |
| H                                      | -0.705627 | -4.843001 | -0.419388                                                            |
| H                                      | 0.583567  | -4.316103 | -1.514379                                                            |
| H                                      | 0.336556  | -3.468867 | 0.022726                                                             |
| C                                      | -1.056585 | 0.331909  | -3.348574                                                            |
| H                                      | -0.878128 | 1.097621  | -2.578593                                                            |
| H                                      | -0.103926 | 0.176723  | -3.874665                                                            |
| H                                      | -1.786469 | 0.732132  | -4.064951                                                            |
| H                                      | -3.610334 | -0.607428 | -3.308856                                                            |
| H                                      | -2.886777 | -4.246898 | -1.129633                                                            |
| 83                                     |           |           |                                                                      |
| Figure_S15-4_PA-9b(Na)-ts(1,6major)_04 |           |           | / electronic energy: -3681.00780852 a.u. / lowest freq: -440.92 cm-1 |
| C                                      | -3.049815 | 0.984897  | -2.252606                                                            |
| H                                      | -3.584829 | 1.821609  | -1.775870                                                            |
| C                                      | -1.808749 | 1.448672  | -3.008644                                                            |
| H                                      | -1.582676 | 0.811573  | -3.881131                                                            |
| C                                      | -1.170789 | 0.443630  | -1.008105                                                            |
| C                                      | 0.535813  | 1.833916  | -2.096631                                                            |
| C                                      | 0.677418  | 3.219669  | -1.890399                                                            |
| C                                      | 1.638079  | 1.020937  | -2.416824                                                            |
| C                                      | 3.061107  | 2.986433  | -2.270013                                                            |
| H                                      | 4.053855  | 3.436523  | -2.333875                                                            |
| Cu                                     | -0.096034 | -0.405568 | 0.405049                                                             |
| N                                      | -2.457207 | 0.158155  | -1.195947                                                            |
| N                                      | -0.767975 | 1.270799  | -1.988566                                                            |
| C                                      | 1.192684  | -0.467317 | 2.016976                                                             |
| C                                      | 0.395746  | 0.732078  | 2.153285                                                             |
| Na                                     | -2.444378 | 2.876474  | 1.776078                                                             |
| H                                      | -1.877322 | 2.487582  | -3.352667                                                            |
| H                                      | -3.749351 | 0.414472  | -2.877130                                                            |
| H                                      | 0.898781  | -1.308964 | 2.649934                                                             |
| C                                      | 0.961535  | 2.041106  | 1.793698                                                             |



|   |           |           |           |
|---|-----------|-----------|-----------|
| C | -0.852784 | 0.639721  | 2.916025  |
| O | 0.062405  | 3.056150  | 1.760212  |
| O | 2.124502  | 2.248957  | 1.525181  |
| O | -1.494734 | 1.560235  | 3.396760  |
| O | -1.291755 | -0.626188 | 3.029490  |
| C | -2.565711 | -0.810743 | 3.628935  |
| H | -2.564664 | -0.471583 | 4.674175  |
| H | -2.766587 | -1.886412 | 3.581134  |
| H | -3.332284 | -0.254977 | 3.068665  |
| C | 0.612336  | 4.357377  | 1.605391  |
| H | 1.236307  | 4.617911  | 2.472274  |
| H | -0.236842 | 5.047431  | 1.540946  |
| H | 1.224578  | 4.419424  | 0.696860  |
| C | -3.275976 | -0.507285 | -0.196958 |
| H | -2.601723 | -0.709745 | 0.651375  |
| C | -3.832195 | -1.830025 | -0.683416 |
| C | -4.616046 | -2.609872 | 0.180369  |
| C | -3.564697 | -2.332550 | -1.962345 |
| C | -5.131728 | -3.837456 | -0.229398 |
| H | -4.814133 | -2.257282 | 1.195219  |
| C | -4.079778 | -3.562028 | -2.375932 |
| H | -2.924775 | -1.765177 | -2.640846 |
| C | -4.870672 | -4.318020 | -1.513525 |
| H | -5.737859 | -4.427419 | 0.462025  |
| H | -3.854908 | -3.931929 | -3.378977 |
| H | -5.274584 | -5.280477 | -1.835092 |
| C | -4.345361 | 0.497582  | 0.342059  |
| H | -4.899757 | -0.067610 | 1.135953  |
| H | -5.105002 | 0.602453  | -0.483508 |
| O | -3.798292 | 1.647730  | 0.752651  |
| C | 2.383916  | -0.616297 | 1.285100  |
| H | 2.709561  | 0.203553  | 0.642641  |
| C | 3.126410  | -1.800353 | 1.325451  |
| H | 2.994590  | -2.423497 | 2.212434  |
| C | 4.457438  | -1.906561 | 0.685799  |
| C | 5.408745  | -2.799644 | 1.199178  |
| C | 4.797164  | -1.152534 | -0.448748 |
| C | 6.663091  | -2.930902 | 0.605286  |
| H | 5.159641  | -3.399119 | 2.079113  |
| C | 6.048990  | -1.282713 | -1.042735 |
| H | 4.067902  | -0.463053 | -0.878835 |
| C | 6.989146  | -2.172882 | -0.518991 |
| H | 7.390058  | -3.631316 | 1.022902  |
| H | 6.292281  | -0.687259 | -1.926048 |
| H | 7.969879  | -2.276893 | -0.988132 |
| C | -0.200664 | -2.392537 | -0.104310 |
| H | -1.190481 | -2.606408 | -0.509892 |
| C | 0.868502  | -3.056170 | 0.006182  |
| C | 2.155679  | -3.453052 | 0.193061  |
| H | 2.381289  | -4.199578 | 0.959491  |
| H | 2.816610  | -3.464510 | -0.679557 |
| C | 1.954210  | 3.779424  | -1.981194 |
| H | 2.080821  | 4.852197  | -1.815396 |
| C | 2.899793  | 1.622769  | -2.491135 |
| H | 3.766953  | 1.009083  | -2.748634 |
| C | -0.516051 | 4.085360  | -1.587529 |
| H | -1.079200 | 4.324813  | -2.503412 |
| H | -1.209835 | 3.580630  | -0.901163 |
| H | -0.207723 | 5.039710  | -1.142297 |
| C | 1.490967  | -0.454061 | -2.673507 |
| H | 1.523432  | -1.025697 | -1.733335 |
| H | 0.530610  | -0.692888 | -3.151208 |
| H | 2.303270  | -0.818068 | -3.317278 |

83

Figure\_S15-4\_PA-9b(Na)-ts(1,6major)\_05 / electronic energy: -3681.00473590 a.u. / lowest freq: -469.73 cm-1

|    |           |           |           |
|----|-----------|-----------|-----------|
| C  | -4.002505 | 0.075621  | 1.124597  |
| H  | -4.659529 | -0.231101 | 0.296878  |
| C  | -3.491607 | -1.101073 | 1.957204  |
| H  | -3.479967 | -0.885270 | 3.038679  |
| C  | -1.723367 | -0.207185 | 0.714784  |
| C  | -1.308677 | -2.356177 | 1.837374  |
| C  | -1.450606 | -3.551765 | 1.113971  |
| C  | -0.435910 | -2.243799 | 2.930382  |
| C  | -0.732251 | -4.670367 | 1.543524  |
| C  | 0.286792  | -3.379163 | 3.311522  |
| C  | 0.129490  | -4.585124 | 2.634693  |
| H  | 0.689437  | -5.466280 | 2.955503  |
| Cu | 0.098211  | 0.219341  | 0.044869  |
| N  | -2.760238 | 0.613347  | 0.555328  |
| N  | -2.117895 | -1.247021 | 1.462299  |
| C  | 1.622972  | 0.146416  | -1.420907 |
| C  | 0.653474  | -0.889069 | -1.690407 |
| H  | -4.068895 | -2.023712 | 1.805481  |
| H  | -4.528788 | 0.825665  | 1.729938  |
| H  | 1.426912  | 1.092906  | -1.933116 |
| C  | 0.973859  | -2.278419 | -1.307767 |
| C  | -0.476556 | -0.592718 | -2.575414 |
| O  | 0.420385  | -3.208396 | -2.094674 |
| O  | 1.721394  | -2.583583 | -0.398456 |

|    |           |           |           |
|----|-----------|-----------|-----------|
| O  | -1.398083 | -1.349037 | -2.852514 |
| O  | -0.453790 | 0.660684  | -3.050897 |
| C  | -1.560895 | 1.092095  | -3.834687 |
| H  | -1.618707 | 0.515785  | -4.770116 |
| H  | -1.366572 | 2.145326  | -4.066559 |
| H  | -2.503187 | 0.989582  | -3.268602 |
| C  | 0.755114  | -4.555707 | -1.812465 |
| H  | 1.816100  | -4.748227 | -2.030576 |
| H  | 0.123862  | -5.171804 | -2.462832 |
| H  | 0.566743  | -4.795569 | -0.757930 |
| C  | -2.748406 | 1.762746  | -0.334986 |
| H  | -1.886203 | 1.618005  | -1.004725 |
| C  | -2.558044 | 3.078576  | 0.387557  |
| C  | -2.773516 | 3.232472  | 1.761022  |
| C  | -2.150321 | 4.198475  | -0.349057 |
| C  | -2.594221 | 4.470422  | 2.380228  |
| H  | -3.058764 | 2.370872  | 2.367980  |
| C  | -1.971519 | 5.436224  | 0.264372  |
| H  | -1.953512 | 4.091001  | -1.419381 |
| C  | -2.195622 | 5.578473  | 1.634578  |
| H  | -2.762147 | 4.566558  | 3.455418  |
| H  | -1.645415 | 6.293626  | -0.329024 |
| H  | -2.050746 | 6.546352  | 2.119393  |
| C  | -4.018470 | 1.741362  | -1.245693 |
| H  | -3.905984 | 2.645123  | -1.900787 |
| H  | -4.878032 | 2.010051  | -0.571224 |
| O  | -4.167464 | 0.584444  | -1.907104 |
| C  | 2.876792  | 0.044194  | -0.799058 |
| H  | 3.152510  | -0.896033 | -0.322659 |
| C  | 3.708911  | 1.161241  | -0.695526 |
| H  | 3.478782  | 1.990283  | -1.371072 |
| C  | 5.147872  | 1.043537  | -0.353453 |
| C  | 6.056572  | 1.981845  | -0.862988 |
| C  | 5.640995  | 0.024168  | 0.476476  |
| C  | 7.417094  | 1.898606  | -0.569147 |
| H  | 5.689821  | 2.786382  | -1.506333 |
| C  | 6.998871  | -0.059194 | 0.771911  |
| H  | 4.952518  | -0.707886 | 0.904561  |
| C  | 7.894926  | 0.876131  | 0.249327  |
| H  | 8.107439  | 2.637697  | -0.982333 |
| H  | 7.361690  | -0.860163 | 1.420221  |
| H  | 8.960011  | 0.807093  | 0.480938  |
| C  | 0.599754  | 1.813741  | 1.214489  |
| H  | -0.264220 | 2.140602  | 1.793907  |
| C  | 1.802970  | 2.206591  | 1.195363  |
| C  | 3.137221  | 2.390992  | 0.997667  |
| H  | 3.820848  | 1.977203  | 1.745667  |
| H  | 3.474504  | 3.319085  | 0.526583  |
| Na | -3.656876 | -1.309937 | -2.660622 |
| H  | 0.976458  | -3.314742 | 4.156650  |
| H  | -0.844000 | -5.617753 | 1.010321  |
| C  | -2.312350 | -3.594887 | -0.119865 |
| H  | -3.357732 | -3.322836 | 0.093595  |
| H  | -1.928057 | -2.888873 | -0.873186 |
| H  | -2.310215 | -4.599482 | -0.563709 |
| C  | -0.258432 | -0.930418 | 3.643094  |
| H  | 0.267955  | -1.067322 | 4.596850  |
| H  | 0.329740  | -0.233225 | 3.024944  |
| H  | -1.222177 | -0.440859 | 3.845806  |

83

Figure\_S15-4\_PA-9b(Na)-ts(1,6minor)\_01 / electronic energy: -3681.00662586 a.u. / lowest freq: -473.73 cm-1

|    |           |           |           |
|----|-----------|-----------|-----------|
| C  | 3.186998  | 2.460131  | -0.440560 |
| H  | 3.647008  | 2.672480  | 0.537318  |
| C  | 3.879383  | 1.307115  | -1.162490 |
| H  | 3.958625  | 1.473301  | -2.250094 |
| C  | 1.766979  | 0.614601  | -0.437847 |
| C  | 3.340236  | -1.134927 | -1.249282 |
| C  | 4.272016  | -1.803179 | -0.433424 |
| C  | 2.869931  | -1.709438 | -2.445763 |
| C  | 4.732775  | -3.060109 | -0.840604 |
| C  | 3.334204  | -2.979947 | -2.799618 |
| C  | 4.266660  | -3.648033 | -2.011241 |
| H  | 4.632013  | -4.632387 | -2.312038 |
| Cu | 0.005988  | -0.317213 | -0.311251 |
| N  | 1.837946  | 1.930352  | -0.237902 |
| N  | 2.960739  | 0.192986  | -0.898364 |
| C  | -1.406904 | -1.719397 | 0.496445  |
| C  | -0.338186 | -1.474598 | 1.431045  |
| Na | 2.341076  | -0.067471 | 3.032442  |
| H  | 4.886791  | 1.097454  | -0.777504 |
| H  | 3.170785  | 3.383701  | -1.034047 |
| H  | -1.200541 | -2.531888 | -0.208867 |
| C  | 0.813034  | -2.386857 | 1.470565  |
| C  | -0.466059 | -0.542969 | 2.564299  |
| O  | 0.639655  | -3.476778 | 0.715868  |
| O  | 1.851190  | -2.204395 | 2.089225  |
| O  | 0.131983  | -0.633268 | 3.621496  |
| O  | -1.312435 | 0.465320  | 2.332683  |
| C  | -1.369839 | 1.478520  | 3.332246  |

|   |           |           |           |
|---|-----------|-----------|-----------|
| H | -1.776586 | 1.076378  | 4.270802  |
| H | -2.035574 | 2.252660  | 2.934780  |
| H | -0.356385 | 1.872741  | 3.495396  |
| C | 1.717096  | -4.396078 | 0.640149  |
| H | 2.625415  | -3.905373 | 0.270039  |
| H | 1.401022  | -5.176326 | -0.060710 |
| H | 1.919875  | -4.837944 | 1.626102  |
| C | 0.844982  | 2.670435  | 0.535769  |
| H | 0.035196  | 1.949400  | 0.719185  |
| C | 0.262938  | 3.838181  | -0.231649 |
| C | 0.955183  | 5.044749  | -0.404170 |
| C | -1.021970 | 3.726903  | -0.779375 |
| C | 0.384259  | 6.100928  | -1.115569 |
| H | 1.949721  | 5.171299  | 0.029685  |
| C | -1.595640 | 4.779306  | -1.490778 |
| H | -1.573371 | 2.791475  | -0.653319 |
| C | -0.891689 | 5.971171  | -1.663722 |
| H | 0.939063  | 7.034003  | -1.238620 |
| H | -2.596754 | 4.666556  | -1.913580 |
| H | -1.337755 | 6.798924  | -2.219723 |
| C | 1.417019  | 3.020451  | 1.939439  |
| H | 0.572881  | 3.569196  | 2.440717  |
| H | 2.192472  | 3.820797  | 1.789144  |
| O | 1.860067  | 1.939278  | 2.594087  |
| C | -2.731472 | -1.262023 | 0.507844  |
| H | -3.036623 | -0.538517 | 1.262916  |
| C | -3.620363 | -1.624213 | -0.506240 |
| H | -3.318081 | -2.475297 | -1.124353 |
| C | -5.090644 | -1.472624 | -0.366693 |
| C | -5.940889 | -2.321331 | -1.089755 |
| C | -5.671629 | -0.494421 | 0.455571  |
| C | -7.326841 | -2.207031 | -0.988907 |
| H | -5.506790 | -3.084553 | -1.741503 |
| C | -7.055394 | -0.378967 | 0.557214  |
| H | -5.036689 | 0.192861  | 1.018626  |
| C | -7.890623 | -1.234940 | -0.163654 |
| H | -7.968862 | -2.881076 | -1.560515 |
| H | -7.486341 | 0.388587  | 1.204128  |
| H | -8.975644 | -1.141062 | -0.082307 |
| C | -0.895449 | 0.434790  | -1.979520 |
| H | -0.217607 | 1.113147  | -2.497991 |
| C | -2.104730 | 0.136683  | -2.208382 |
| C | -3.399554 | -0.282023 | -2.185872 |
| H | -3.737853 | -0.995740 | -2.943565 |
| H | -4.151942 | 0.443970  | -1.863978 |
| C | 4.778701  | -1.220415 | 0.859287  |
| H | 4.533305  | -1.895982 | 1.691826  |
| H | 5.872084  | -1.099274 | 0.835471  |
| H | 4.332969  | -0.241959 | 1.073633  |
| C | 1.898989  | -0.988383 | -3.339136 |
| H | 0.863420  | -1.133116 | -2.995777 |
| H | 2.080238  | 0.095521  | -3.350399 |
| H | 1.967479  | -1.364020 | -4.368824 |
| H | 2.973754  | -3.438463 | -3.723688 |
| H | 5.458275  | -3.587110 | -0.215691 |

83

Figure\_S15-4\_PA-9b(Na)-ts(1,6minor)\_02 / electronic energy: -3681.00610479 a.u. / lowest freq: -471.38 cm-1

|    |           |           |           |
|----|-----------|-----------|-----------|
| C  | 3.287832  | 2.331087  | -0.099700 |
| H  | 3.641751  | 2.388425  | 0.941917  |
| C  | 3.974095  | 1.220340  | -0.882220 |
| H  | 4.099600  | 1.466283  | -1.951015 |
| C  | 1.791155  | 0.570498  | -0.370232 |
| C  | 3.350035  | -1.183303 | -1.197299 |
| C  | 4.291841  | -1.918942 | -0.451484 |
| C  | 2.835169  | -1.674059 | -2.412442 |
| C  | 4.710432  | -3.159327 | -0.942081 |
| C  | 3.259019  | -2.933742 | -2.850287 |
| C  | 4.194430  | -3.668928 | -2.129261 |
| H  | 4.524827  | -4.642895 | -2.496805 |
| Cu | -0.015401 | -0.274448 | -0.306751 |
| N  | 1.897007  | 1.869016  | -0.093632 |
| N  | 3.006662  | 0.122372  | -0.744892 |
| C  | -1.435289 | -1.679095 | 0.481627  |
| C  | -0.384787 | -1.429446 | 1.434932  |
| H  | 4.956921  | 0.950468  | -0.476179 |
| H  | 3.389713  | 3.319335  | -0.566762 |
| H  | -1.202967 | -2.472488 | -0.237774 |
| C  | 0.778735  | -2.325340 | 1.489787  |
| C  | -0.541233 | -0.502980 | 2.568959  |
| O  | 0.625689  | -3.419961 | 0.737245  |
| O  | 1.807552  | -2.126168 | 2.118514  |
| O  | 0.034690  | -0.596638 | 3.638626  |
| O  | -1.384124 | 0.504985  | 2.325700  |
| C  | -1.469752 | 1.508359  | 3.333440  |
| H  | -1.883786 | 1.092241  | 4.262557  |
| H  | -2.141729 | 2.275912  | 2.933739  |
| H  | -0.464792 | 1.916394  | 3.517068  |
| C  | 1.711294  | -4.330670 | 0.678278  |
| H  | 2.619703  | -3.834764 | 0.315908  |

|    |           |           |           |
|----|-----------|-----------|-----------|
| H  | 1.409538  | -5.116861 | -0.022278 |
| H  | 1.906374  | -4.766259 | 1.668604  |
| C  | 0.854749  | 2.643774  | 0.556569  |
| H  | 0.022126  | 1.944359  | 0.736138  |
| C  | 0.347381  | 3.775545  | -0.314609 |
| C  | -0.644801 | 4.638580  | 0.173963  |
| C  | 0.811604  | 3.981929  | -1.619226 |
| C  | -1.137906 | 5.682441  | -0.606576 |
| H  | -1.049966 | 4.484211  | 1.176555  |
| C  | 0.321178  | 5.026433  | -2.403471 |
| H  | 1.557174  | 3.304007  | -2.039842 |
| C  | -0.652506 | 5.885989  | -1.898931 |
| H  | -1.911875 | 6.339752  | -0.203406 |
| H  | 0.702160  | 5.164257  | -3.418126 |
| H  | -1.038622 | 6.703793  | -2.511325 |
| C  | 1.358075  | 3.071468  | 1.973833  |
| H  | 0.496522  | 3.621792  | 2.433224  |
| H  | 2.121944  | 3.879831  | 1.797844  |
| O  | 1.794645  | 2.026723  | 2.688976  |
| C  | -2.769500 | -1.250692 | 0.487073  |
| H  | -3.101179 | -0.560681 | 1.262445  |
| C  | -3.632839 | -1.588402 | -0.555572 |
| H  | -3.296830 | -2.396868 | -1.212346 |
| C  | -5.108215 | -1.479062 | -0.437907 |
| C  | -5.923427 | -2.315050 | -1.214292 |
| C  | -5.728794 | -0.556235 | 0.418861  |
| C  | -7.313370 | -2.243004 | -1.131738 |
| H  | -5.458253 | -3.035426 | -1.892787 |
| C  | -7.116555 | -0.482782 | 0.502014  |
| H  | -5.121757 | 0.120672  | 1.023643  |
| C  | -7.916457 | -1.326282 | -0.271657 |
| H  | -7.927901 | -2.906798 | -1.744151 |
| H  | -7.578740 | 0.242004  | 1.176136  |
| H  | -9.004836 | -1.265733 | -0.204225 |
| C  | -0.918591 | 0.582884  | -1.915210 |
| H  | -0.245463 | 1.295833  | -2.392581 |
| C  | -2.126924 | 0.290142  | -2.155624 |
| C  | -3.417079 | -0.142030 | -2.164179 |
| H  | -4.179825 | 0.551827  | -1.798989 |
| H  | -3.743938 | -0.816028 | -2.962313 |
| Na | 2.238976  | 0.010640  | 3.143407  |
| H  | 2.863078  | -3.329046 | -3.789086 |
| H  | 5.438764  | -3.738986 | -0.369520 |
| C  | 1.871489  | -0.878349 | -3.249505 |
| H  | 0.829984  | -1.060523 | -2.943784 |
| H  | 2.042577  | 0.202992  | -3.155497 |
| H  | 1.963048  | -1.153380 | -4.308948 |
| C  | 4.856584  | -1.402656 | 0.844152  |
| H  | 5.847632  | -0.945431 | 0.691875  |
| H  | 4.202608  | -0.644743 | 1.289478  |
| H  | 4.978588  | -2.221347 | 1.566163  |

83

Figure\_S15-4\_PA-9b(Na)-ts(1,6minor)\_03 / electronic energy: -3681.00799031 a.u. / lowest freq: -409.85 cm<sup>-1</sup>

|    |           |           |           |
|----|-----------|-----------|-----------|
| C  | -1.611495 | 1.866970  | 2.833384  |
| H  | -2.038393 | 2.835963  | 2.536035  |
| C  | -2.674323 | 0.777538  | 3.003521  |
| H  | -2.501268 | 0.152042  | 3.893808  |
| C  | -1.398839 | 0.336824  | 1.088293  |
| C  | -3.370824 | -1.077217 | 1.425354  |
| C  | -4.389558 | -0.825180 | 0.491848  |
| C  | -3.199447 | -2.339032 | 2.019480  |
| C  | -5.230388 | -1.883385 | 0.131707  |
| C  | -4.064404 | -3.369459 | 1.637133  |
| C  | -5.067722 | -3.145665 | 0.697328  |
| H  | -5.732289 | -3.961816 | 0.405722  |
| Cu | -0.573751 | -0.557675 | -0.481418 |
| N  | -0.822627 | 1.360922  | 1.705460  |
| N  | -2.496049 | -0.012870 | 1.780533  |
| C  | 0.583761  | -0.582524 | -2.207607 |
| C  | -0.226425 | 0.615669  | -2.328144 |
| H  | -3.695606 | 1.179837  | 3.064074  |
| H  | -0.986951 | 2.000409  | 3.727725  |
| H  | 0.268771  | -1.443053 | -2.803293 |
| C  | -1.619113 | 0.482080  | -2.768500 |
| C  | 0.336963  | 1.969566  | -2.338216 |
| O  | -1.928545 | -0.773427 | -3.131097 |
| O  | -2.471312 | 1.360056  | -2.769062 |
| O  | -0.267262 | 2.997037  | -2.603261 |
| O  | 1.647646  | 2.012576  | -2.067449 |
| C  | 2.270854  | 3.284954  | -2.116587 |
| H  | 2.188538  | 3.725703  | -3.119830 |
| H  | 3.323745  | 3.114315  | -1.866745 |
| H  | 1.813011  | 3.972508  | -1.390689 |
| C  | -3.287668 | -1.060819 | -3.415503 |
| H  | -3.890001 | -1.028656 | -2.495620 |
| H  | -3.303984 | -2.075858 | -3.826721 |
| H  | -3.699464 | -0.349476 | -4.143682 |
| C  | 0.303198  | 2.103192  | 1.171889  |
| H  | 0.400952  | 1.775257  | 0.128020  |

|    |           |           |           |
|----|-----------|-----------|-----------|
| C  | 1.604953  | 1.771356  | 1.874646  |
| C  | 2.789337  | 2.415986  | 1.487884  |
| C  | 1.683885  | 0.797183  | 2.877039  |
| C  | 4.004875  | 2.114095  | 2.098381  |
| H  | 2.763009  | 3.163127  | 0.693228  |
| C  | 2.899524  | 0.492780  | 3.491345  |
| H  | 0.782418  | 0.257537  | 3.174266  |
| C  | 4.064639  | 1.155817  | 3.110829  |
| H  | 4.913230  | 2.629031  | 1.777465  |
| H  | 2.933517  | -0.271283 | 4.271209  |
| H  | 5.015674  | 0.923241  | 3.595156  |
| C  | -0.075892 | 3.620935  | 1.113911  |
| H  | 0.802202  | 4.119886  | 0.624988  |
| H  | -0.019637 | 3.985234  | 2.179977  |
| O  | -1.252304 | 3.827666  | 0.509561  |
| C  | 1.815989  | -0.689306 | -1.535593 |
| H  | 2.135611  | 0.132061  | -0.892652 |
| C  | 2.628631  | -1.819088 | -1.622941 |
| H  | 2.504149  | -2.447370 | -2.506604 |
| C  | 3.971954  | -1.857280 | -1.005625 |
| C  | 4.975693  | -2.648543 | -1.583053 |
| C  | 4.277642  | -1.133578 | 0.159445  |
| C  | 6.251558  | -2.708988 | -1.025235 |
| H  | 4.750822  | -3.222026 | -2.486469 |
| C  | 5.551927  | -1.195509 | 0.716008  |
| H  | 3.512066  | -0.527134 | 0.651591  |
| C  | 6.545286  | -1.981346 | 0.127559  |
| H  | 7.019642  | -3.328508 | -1.493780 |
| H  | 5.766428  | -0.627533 | 1.623784  |
| H  | 7.542310  | -2.029824 | 0.570724  |
| C  | -0.616944 | -2.579003 | -0.189223 |
| H  | -1.619661 | -2.850836 | 0.142017  |
| C  | 0.470581  | -3.215240 | -0.292490 |
| C  | 1.758043  | -3.590041 | -0.489742 |
| H  | 2.002781  | -4.274852 | -1.305837 |
| H  | 2.438145  | -3.610290 | 0.367395  |
| Na | -2.178936 | 3.299094  | -1.347766 |
| H  | -3.940012 | -4.361610 | 2.077679  |
| H  | -6.026328 | -1.710471 | -0.597009 |
| C  | -4.558769 | 0.544808  | -0.107595 |
| H  | -4.502664 | 1.330650  | 0.659867  |
| H  | -3.770869 | 0.756164  | -0.846489 |
| H  | -5.526262 | 0.630253  | -0.620457 |
| C  | -2.096091 | -2.579290 | 3.014641  |
| H  | -1.940833 | -3.654105 | 3.175744  |
| H  | -1.148562 | -2.142298 | 2.665934  |
| H  | -2.330588 | -2.126869 | 3.991109  |

83

Figure\_S15-4\_PA-9b(Na)-ts(1,6minor)\_04 / electronic energy: -3681.00623136 a.u. / lowest freq: -470.11 cm-1

|    |           |           |           |
|----|-----------|-----------|-----------|
| C  | 3.215583  | 2.418883  | -0.066799 |
| H  | 3.567762  | 2.492518  | 0.974364  |
| C  | 3.943861  | 1.332114  | -0.844065 |
| H  | 4.050050  | 1.573802  | -1.916228 |
| C  | 1.790820  | 0.597963  | -0.326527 |
| C  | 3.410595  | -1.083112 | -1.188254 |
| C  | 4.311558  | -1.854768 | -0.430485 |
| C  | 2.985154  | -1.493936 | -2.465514 |
| C  | 4.779159  | -3.054802 | -0.975987 |
| C  | 3.452324  | -2.717239 | -2.958415 |
| C  | 4.348025  | -3.489280 | -2.225633 |
| H  | 4.718922  | -4.431559 | -2.634831 |
| Cu | 0.010886  | -0.305688 | -0.290788 |
| N  | 1.844045  | 1.902576  | -0.060814 |
| N  | 3.025257  | 0.194942  | -0.687999 |
| C  | -1.419541 | -1.717868 | 0.471941  |
| C  | -0.380001 | -1.478409 | 1.440284  |
| Na | 2.245900  | -0.007809 | 3.102819  |
| H  | 4.942134  | 1.105103  | -0.447646 |
| H  | 3.278453  | 3.408794  | -0.537126 |
| H  | -1.179780 | -2.507782 | -0.248412 |
| C  | 0.781919  | -2.373918 | 1.490651  |
| C  | -0.545216 | -0.566023 | 2.585272  |
| O  | 0.658974  | -3.434382 | 0.685111  |
| O  | 1.789792  | -2.201271 | 2.160963  |
| O  | 0.038985  | -0.658922 | 3.650009  |
| O  | -1.406691 | 0.429710  | 2.356163  |
| C  | -1.502418 | 1.421036  | 3.374977  |
| H  | -1.913833 | 0.990780  | 4.298845  |
| H  | -2.181168 | 2.186621  | 2.982937  |
| H  | -0.501110 | 1.835736  | 3.563676  |
| C  | 1.757491  | -4.327687 | 0.603614  |
| H  | 2.645706  | -3.820507 | 0.206014  |
| H  | 1.448460  | -5.124975 | -0.080962 |
| H  | 1.991729  | -4.749773 | 1.590767  |
| C  | 0.775142  | 2.638384  | 0.590900  |
| H  | -0.040515 | 1.913866  | 0.749478  |
| C  | 0.247956  | 3.769798  | -0.269872 |
| C  | 0.680258  | 3.967765  | -1.586996 |
| C  | -0.730958 | 4.637432  | 0.236889  |

|   |           |           |           |
|---|-----------|-----------|-----------|
| C | 0.170869  | 5.006475  | -2.366533 |
| H | 1.416601  | 3.287092  | -2.019884 |
| C | -1.242836 | 5.675917  | -0.538961 |
| H | -1.111211 | 4.492383  | 1.250349  |
| C | -0.790178 | 5.869883  | -1.844441 |
| H | 0.526502  | 5.136872  | -3.391316 |
| H | -2.005822 | 6.336890  | -0.121080 |
| H | -1.191196 | 6.683448  | -2.452889 |
| C | 1.255483  | 3.051874  | 2.020167  |
| H | 0.373919  | 3.560853  | 2.488372  |
| H | 1.992081  | 3.889766  | 1.867727  |
| O | 1.724006  | 2.005806  | 2.713135  |
| C | -2.753757 | -1.290029 | 0.464249  |
| H | -3.094342 | -0.599949 | 1.235498  |
| C | -3.606681 | -1.635032 | -0.584621 |
| H | -3.263735 | -2.446703 | -1.233683 |
| C | -5.083135 | -1.526512 | -0.481399 |
| C | -5.889814 | -2.371788 | -1.256590 |
| C | -5.712899 | -0.596385 | 0.360662  |
| C | -7.280538 | -2.302022 | -1.186691 |
| H | -5.417195 | -3.097799 | -1.923794 |
| C | -7.101479 | -0.525167 | 0.431074  |
| H | -5.112472 | 0.087954  | 0.963696  |
| C | -7.892903 | -1.378096 | -0.341009 |
| H | -7.888473 | -2.973105 | -1.797708 |
| H | -7.571099 | 0.205266  | 1.093845  |
| H | -8.981950 | -1.319276 | -0.283562 |
| C | -0.881388 | 0.530669  | -1.918482 |
| H | -0.210538 | 1.250846  | -2.387865 |
| C | -2.085116 | 0.233407  | -2.177274 |
| C | -3.374337 | -0.199411 | -2.201559 |
| H | -3.691292 | -0.878116 | -2.999632 |
| H | -4.141653 | 0.495249  | -1.847755 |
| C | 4.724997  | -1.466226 | 0.963501  |
| H | 4.011813  | -1.906690 | 1.677508  |
| H | 5.726710  | -1.851363 | 1.197078  |
| H | 4.723915  | -0.381175 | 1.125800  |
| C | 2.059174  | -0.652479 | -3.300877 |
| H | 1.006832  | -0.846286 | -3.042939 |
| H | 2.229808  | 0.422594  | -3.147944 |
| H | 2.190807  | -0.874720 | -4.368249 |
| H | 3.125300  | -3.051903 | -3.946028 |
| H | 5.480609  | -3.662551 | -0.399115 |

83

Figure\_S15-4\_PA-9b(Na)-ts(1,6minor)\_05 / electronic energy: -3681.00676070 a.u. / lowest freq: -408.77 cm-1

|    |           |           |           |
|----|-----------|-----------|-----------|
| C  | -1.508697 | 1.473585  | 3.076580  |
| H  | -1.970792 | 2.450284  | 2.868091  |
| C  | -2.536913 | 0.342883  | 3.163541  |
| H  | -2.319062 | -0.364673 | 3.979424  |
| C  | -1.295230 | 0.126674  | 1.190145  |
| C  | -3.215740 | -1.374864 | 1.427608  |
| C  | -4.267538 | -1.083655 | 0.544577  |
| C  | -2.972522 | -2.679157 | 1.891354  |
| C  | -5.078378 | -2.137630 | 0.111138  |
| C  | -3.809933 | -3.704469 | 1.440887  |
| C  | -4.852428 | -3.437403 | 0.556367  |
| H  | -5.494779 | -4.250310 | 0.210950  |
| Cu | -0.527962 | -0.534460 | -0.519601 |
| N  | -0.716136 | 1.084314  | 1.906001  |
| N  | -2.373999 | -0.311755 | 1.860401  |
| C  | 0.555754  | -0.311162 | -2.280440 |
| C  | -0.292108 | 0.864120  | -2.232703 |
| H  | -3.566152 | 0.705945  | 3.293714  |
| H  | -0.885105 | 1.558005  | 3.976996  |
| H  | 0.244136  | -1.104782 | -2.963606 |
| C  | -1.676677 | 0.738072  | -2.695985 |
| C  | 0.320205  | 2.183726  | -2.015188 |
| O  | -1.930706 | -0.450606 | -3.261806 |
| O  | -2.576840 | 1.556814  | -2.548665 |
| O  | 1.465050  | 2.368836  | -1.651161 |
| O  | -0.482332 | 3.227343  | -2.305143 |
| C  | 0.062404  | 4.524041  | -2.080129 |
| H  | 0.162094  | 4.693998  | -0.999189 |
| H  | -0.663035 | 5.228749  | -2.503060 |
| H  | 1.033847  | 4.635947  | -2.578357 |
| C  | -3.279871 | -0.750654 | -3.579186 |
| H  | -3.893191 | -0.801728 | -2.667541 |
| H  | -3.264317 | -1.731168 | -4.066741 |
| H  | -3.704308 | 0.001928  | -4.257407 |
| C  | 0.382149  | 1.894379  | 1.413854  |
| H  | 0.474130  | 1.650650  | 0.349585  |
| C  | 1.711001  | 1.567237  | 2.056566  |
| C  | 2.872215  | 2.155166  | 1.531504  |
| C  | 1.843929  | 0.675831  | 3.126371  |
| C  | 4.122110  | 1.888548  | 2.085318  |
| H  | 2.789056  | 2.805373  | 0.657503  |
| C  | 3.096602  | 0.402564  | 3.679173  |
| H  | 0.961322  | 0.171317  | 3.524969  |
| C  | 4.239176  | 1.015808  | 3.168725  |

|    |           |           |           |
|----|-----------|-----------|-----------|
| H  | 5.013656  | 2.352220  | 1.656930  |
| H  | 3.177362  | -0.299067 | 4.512764  |
| H  | 5.218557  | 0.806137  | 3.605052  |
| C  | -0.021827 | 3.401074  | 1.458579  |
| H  | 0.859705  | 3.941507  | 1.025105  |
| H  | -0.004347 | 3.693727  | 2.546673  |
| O  | -1.184971 | 3.633399  | 0.832424  |
| C  | 1.816167  | -0.449834 | -1.669974 |
| H  | 2.137287  | 0.311422  | -0.957657 |
| C  | 2.655072  | -1.537521 | -1.920684 |
| H  | 2.526878  | -2.050371 | -2.875459 |
| C  | 4.011788  | -1.616572 | -1.337465 |
| C  | 5.028822  | -2.293705 | -2.026089 |
| C  | 4.314658  | -1.045301 | -0.090296 |
| C  | 6.314266  | -2.388026 | -1.494889 |
| H  | 4.807377  | -2.751274 | -2.994129 |
| C  | 5.598153  | -1.140037 | 0.439338  |
| H  | 3.539530  | -0.531128 | 0.483897  |
| C  | 6.604648  | -1.810077 | -0.259292 |
| H  | 7.092990  | -2.916261 | -2.049889 |
| H  | 5.808541  | -0.687107 | 1.410522  |
| H  | 7.609567  | -1.885801 | 0.161818  |
| C  | -0.520339 | -2.579263 | -0.493903 |
| H  | -1.498209 | -2.924125 | -0.156085 |
| C  | 0.576674  | -3.163292 | -0.725386 |
| C  | 1.863356  | -3.470384 | -1.022409 |
| H  | 2.086745  | -4.030562 | -1.934167 |
| H  | 2.578578  | -3.591543 | -0.203192 |
| Na | -2.422171 | 3.109996  | -0.805016 |
| H  | -3.631840 | -4.727433 | 1.780891  |
| H  | -5.899074 | -1.931754 | -0.580507 |
| C  | -4.495325 | 0.322766  | 0.062396  |
| H  | -4.450834 | 1.047962  | 0.888290  |
| H  | -3.727186 | 0.613943  | -0.670551 |
| H  | -5.473109 | 0.416856  | -0.428679 |
| C  | -1.813659 | -2.967750 | 2.807215  |
| H  | -1.659355 | -4.049189 | 2.915432  |
| H  | -0.885851 | -2.524565 | 2.414431  |
| H  | -1.978481 | -2.552252 | 3.813477  |

83

Figure\_S15-4\_PA-9b(Na)-ts(1,6minor)\_06 / electronic energy: -3681.0011925 a.u. / lowest freq: -471.06 cm-1

|    |           |           |           |
|----|-----------|-----------|-----------|
| C  | 3.278941  | 2.347933  | -0.391932 |
| H  | 3.753346  | 2.344134  | 0.602556  |
| C  | 3.846779  | 1.267251  | -1.302080 |
| H  | 3.809916  | 1.550164  | -2.368621 |
| C  | 1.750894  | 0.606951  | -0.526797 |
| C  | 3.184958  | -1.171626 | -1.461023 |
| C  | 4.161621  | -1.891633 | -0.745637 |
| C  | 2.523445  | -1.735672 | -2.566658 |
| C  | 3.758667  | -3.794698 | -2.194371 |
| H  | 3.973741  | -4.827915 | -2.474882 |
| Cu | -0.025849 | -0.269927 | -0.349492 |
| N  | 1.889594  | 1.902326  | -0.245776 |
| N  | 2.907664  | 0.165200  | -1.057072 |
| C  | -1.394898 | -1.725428 | 0.395272  |
| C  | -0.303188 | -1.546291 | 1.321012  |
| Na | 2.392445  | -0.072174 | 3.126552  |
| H  | 4.879591  | 0.992439  | -1.056521 |
| H  | 3.347330  | 3.356407  | -0.819404 |
| H  | -1.189150 | -2.494364 | -0.360126 |
| C  | 0.766367  | -2.554262 | 1.234141  |
| C  | -0.394069 | -0.655665 | 2.486870  |
| O  | 1.832340  | -2.310118 | 2.029879  |
| O  | 0.746895  | -3.522944 | 0.504259  |
| O  | 0.222243  | -0.764853 | 3.533828  |
| O  | -1.234276 | 0.369277  | 2.294634  |
| C  | -1.266791 | 1.363750  | 3.312220  |
| H  | -1.623489 | 0.940923  | 4.261653  |
| H  | -1.964575 | 2.130045  | 2.956913  |
| H  | -0.257899 | 1.782405  | 3.443723  |
| C  | 2.773123  | -3.367366 | 2.152785  |
| H  | 2.293641  | -4.261995 | 2.574766  |
| H  | 3.548723  | -3.007693 | 2.838686  |
| H  | 3.210260  | -3.622262 | 1.179321  |
| C  | 0.936589  | 2.646346  | 0.559522  |
| H  | 0.128720  | 1.936144  | 0.797523  |
| C  | 0.326609  | 3.818057  | -0.181781 |
| C  | -0.644124 | 4.604029  | 0.456650  |
| C  | 0.663203  | 4.135292  | -1.502842 |
| C  | -1.241964 | 5.680182  | -0.195421 |
| H  | -0.948984 | 4.362526  | 1.477451  |
| C  | 0.066529  | 5.212612  | -2.159734 |
| H  | 1.387965  | 3.518490  | -2.038353 |
| C  | -0.885691 | 5.993459  | -1.507794 |
| H  | -1.997639 | 6.274370  | 0.323702  |
| H  | 0.344115  | 5.435595  | -3.192633 |
| H  | -1.354899 | 6.835935  | -2.020660 |
| C  | 1.598382  | 3.005632  | 1.929370  |
| H  | 0.804654  | 3.555395  | 2.498544  |

|   |           |           |           |
|---|-----------|-----------|-----------|
| H | 2.358377  | 3.804556  | 1.702827  |
| O | 2.084614  | 1.925512  | 2.555028  |
| C | -2.727102 | -1.299088 | 0.473630  |
| H | -3.026423 | -0.641482 | 1.289693  |
| C | -3.634461 | -1.599486 | -0.542609 |
| H | -3.322894 | -2.378302 | -1.245482 |
| C | -5.103618 | -1.501568 | -0.359829 |
| C | -5.947424 | -2.312352 | -1.132393 |
| C | -5.691066 | -0.611019 | 0.552655  |
| C | -7.333220 | -2.245824 | -0.993696 |
| H | -5.508384 | -3.008084 | -1.852766 |
| C | -7.074667 | -0.542801 | 0.691487  |
| H | -5.060997 | 0.045902  | 1.156084  |
| C | -7.903226 | -1.360197 | -0.080143 |
| H | -7.970176 | -2.889486 | -1.604735 |
| H | -7.510888 | 0.158107  | 1.406955  |
| H | -8.988278 | -1.303380 | 0.030300  |
| C | -1.013535 | 0.692525  | -1.853500 |
| H | -0.363533 | 1.445824  | -2.299378 |
| C | -2.218400 | 0.385172  | -2.091194 |
| C | -3.495752 | -0.081614 | -2.097675 |
| H | -3.820064 | -0.727347 | -2.919986 |
| H | -4.270191 | 0.570695  | -1.684226 |
| C | 4.437042  | -3.205963 | -1.131400 |
| H | 5.186571  | -3.778083 | -0.578558 |
| C | 2.816019  | -3.061307 | -2.906085 |
| H | 2.301463  | -3.516274 | -3.756004 |
| C | 4.913208  | -1.272125 | 0.402009  |
| H | 5.827487  | -0.767807 | 0.049683  |
| H | 4.307033  | -0.519653 | 0.922406  |
| H | 5.227401  | -2.036627 | 1.124698  |
| C | 1.528453  | -0.958780 | -3.384225 |
| H | 0.506921  | -1.083465 | -2.993686 |
| H | 1.740970  | 0.119075  | -3.376058 |
| H | 1.531822  | -1.307342 | -4.426124 |

83

Figure\_S15-4\_PA-9b(Na)-ts(1,6minor)\_07 / electronic energy: -3681.00898900 a.u. / lowest freq: -435.85 cm-1

|    |           |           |           |
|----|-----------|-----------|-----------|
| C  | 1.081920  | 3.450821  | 0.699439  |
| H  | 1.189782  | 3.823516  | 1.725784  |
| C  | 2.430808  | 3.217937  | 0.006758  |
| H  | 2.608419  | 3.908501  | -0.829086 |
| C  | 1.193067  | 1.227782  | 0.005479  |
| C  | 3.255927  | 1.180020  | -1.283031 |
| C  | 4.170321  | 0.294995  | -0.687362 |
| C  | 3.246333  | 1.422123  | -2.666984 |
| C  | 5.073712  | -0.375301 | -1.516748 |
| C  | 4.167647  | 0.732783  | -3.461887 |
| C  | 5.070041  | -0.162202 | -2.893336 |
| H  | 5.777802  | -0.698906 | -3.528616 |
| Cu | 0.581471  | -0.580979 | -0.514720 |
| N  | 0.497516  | 2.108290  | 0.715459  |
| N  | 2.295730  | 1.835724  | -0.462907 |
| C  | -0.345968 | -2.386750 | -0.032012 |
| C  | 0.749435  | -2.220112 | 0.889124  |
| H  | 3.282205  | 3.301364  | 0.702019  |
| H  | 0.428859  | 4.136567  | 0.135206  |
| H  | -0.146704 | -3.105294 | -0.832193 |
| C  | 1.994905  | -2.886574 | 0.457689  |
| C  | 0.628980  | -1.640402 | 2.229527  |
| O  | 2.938786  | -2.986414 | 1.399896  |
| O  | 2.168625  | -3.334877 | -0.661316 |
| O  | 1.553066  | -1.256715 | 2.934702  |
| O  | -0.634969 | -1.545816 | 2.651272  |
| C  | -0.866171 | -0.924025 | 3.912269  |
| H  | -0.399831 | -1.507225 | 4.719533  |
| H  | -1.953922 | -0.918667 | 4.043639  |
| H  | -0.470503 | 0.106393  | 3.914512  |
| C  | 4.162497  | -3.576576 | 1.000818  |
| H  | 4.020588  | -4.629550 | 0.718041  |
| H  | 4.831743  | -3.509380 | 1.866007  |
| H  | 4.597165  | -3.040559 | 0.144550  |
| C  | -0.767037 | 1.842502  | 1.379562  |
| H  | -0.810158 | 0.746652  | 1.485143  |
| C  | -1.955232 | 2.271138  | 0.523302  |
| C  | -3.140213 | 2.753823  | 1.094825  |
| C  | -1.908133 | 2.130248  | -0.870520 |
| C  | -4.240243 | 3.079720  | 0.299601  |
| H  | -3.218130 | 2.877112  | 2.175551  |
| C  | -3.006177 | 2.451120  | -1.666293 |
| H  | -1.008117 | 1.738157  | -1.346260 |
| C  | -4.180218 | 2.927472  | -1.084306 |
| H  | -5.152094 | 3.455010  | 0.770072  |
| H  | -2.941409 | 2.319900  | -2.749042 |
| H  | -5.044163 | 3.175340  | -1.704841 |
| C  | -0.725580 | 2.419908  | 2.824427  |
| H  | -1.668578 | 2.051939  | 3.307120  |
| H  | -0.889866 | 3.528822  | 2.725421  |
| O  | 0.390998  | 2.078515  | 3.486294  |
| C  | -1.648517 | -1.853888 | 0.016121  |



|    |           |           |           |
|----|-----------|-----------|-----------|
| H  | -1.912346 | -1.140601 | 0.796977  |
| C  | -2.613264 | -2.201715 | -0.932823 |
| H  | -2.442981 | -3.135892 | -1.472345 |
| C  | -4.036991 | -1.831393 | -0.767477 |
| C  | -5.034551 | -2.696973 | -1.238580 |
| C  | -4.428903 | -0.630785 | -0.153957 |
| C  | -6.384683 | -2.386405 | -1.083252 |
| H  | -4.745928 | -3.631196 | -1.727866 |
| C  | -5.776902 | -0.319928 | -0.000696 |
| H  | -3.674769 | 0.083217  | 0.185020  |
| C  | -6.761681 | -1.196990 | -0.460267 |
| H  | -7.145523 | -3.079150 | -1.450174 |
| H  | -6.056816 | 0.622819  | 0.474692  |
| H  | -7.818847 | -0.951611 | -0.337204 |
| C  | 0.175408  | -0.515441 | -2.519135 |
| H  | 1.045458  | -0.117501 | -3.041816 |
| C  | -1.001042 | -0.812667 | -2.873968 |
| C  | -2.310078 | -1.174414 | -2.905703 |
| H  | -2.608650 | -2.072495 | -3.452836 |
| H  | -3.065854 | -0.384867 | -2.839774 |
| Na | 2.081552  | 0.843221  | 3.620428  |
| H  | 4.168400  | 0.895761  | -4.542393 |
| H  | 5.792473  | -1.070342 | -1.075438 |
| C  | 4.169845  | 0.082905  | 0.802647  |
| H  | 4.220650  | 1.045625  | 1.335224  |
| H  | 3.257015  | -0.431549 | 1.140350  |
| H  | 5.031171  | -0.523450 | 1.112994  |
| C  | 2.267413  | 2.391185  | -3.275723 |
| H  | 2.153180  | 2.211140  | -4.353008 |
| H  | 1.277531  | 2.312575  | -2.803238 |
| H  | 2.608182  | 3.431501  | -3.149367 |

83

Figure\_S15-4\_PA-9b(Na)-ts(1,6minor)\_08 / electronic energy: -3681.00969248 a.u. / lowest freq: -442.20 cm<sup>-1</sup>

|    |           |           |           |
|----|-----------|-----------|-----------|
| C  | 1.122922  | 3.485773  | -0.547243 |
| H  | 1.242695  | 4.184417  | 0.290907  |
| C  | 2.466112  | 3.009010  | -1.118685 |
| H  | 2.619510  | 3.317047  | -2.162504 |
| C  | 1.228481  | 1.161569  | -0.374633 |
| C  | 3.348758  | 0.646207  | -1.453954 |
| C  | 4.206057  | 0.066943  | -0.501948 |
| C  | 3.449261  | 0.351222  | -2.823880 |
| C  | 5.169013  | -0.841519 | -0.950041 |
| C  | 4.424714  | -0.565372 | -3.230467 |
| C  | 5.275455  | -1.159027 | -2.302283 |
| H  | 6.030880  | -1.873870 | -2.635543 |
| Cu | 0.610738  | -0.706995 | -0.185447 |
| N  | 0.517686  | 2.240370  | -0.071145 |
| N  | 2.345211  | 1.551889  | -1.011004 |
| C  | -0.355443 | -2.208102 | 0.878268  |
| C  | 0.687518  | -1.693126 | 1.732554  |
| H  | 3.327466  | 3.364536  | -0.530921 |
| H  | 0.477828  | 3.951086  | -1.309707 |
| H  | -0.131253 | -3.168013 | 0.406155  |
| C  | 1.988156  | -2.392983 | 1.721136  |
| C  | 0.495861  | -0.682689 | 2.776018  |
| O  | 2.162231  | -3.098800 | 0.580483  |
| O  | 2.838895  | -2.374413 | 2.581878  |
| O  | 1.391396  | -0.093405 | 3.366279  |
| O  | -0.787022 | -0.427328 | 3.046379  |
| C  | -1.069499 | 0.604562  | 3.987086  |
| H  | -0.668136 | 0.343470  | 4.976988  |
| H  | -2.162146 | 0.668368  | 4.037662  |
| H  | -0.639707 | 1.562000  | 3.645057  |
| C  | 3.369709  | -3.827834 | 0.461822  |
| H  | 4.237312  | -3.154544 | 0.505179  |
| H  | 3.332827  | -4.322858 | -0.514829 |
| H  | 3.459800  | -4.577275 | 1.261439  |
| C  | -0.764138 | 2.233510  | 0.612163  |
| H  | -0.823075 | 1.247523  | 1.099729  |
| C  | -1.925653 | 2.329033  | -0.373312 |
| C  | -3.127336 | 2.967609  | -0.038377 |
| C  | -1.837077 | 1.713388  | -1.629727 |
| C  | -4.202998 | 2.985906  | -0.927822 |
| H  | -3.237817 | 3.456046  | 0.930336  |
| C  | -2.911029 | 1.726045  | -2.517557 |
| H  | -0.921536 | 1.193248  | -1.915119 |
| C  | -4.101857 | 2.362696  | -2.170122 |
| H  | -5.128936 | 3.490865  | -0.642565 |
| H  | -2.814403 | 1.228838  | -3.485642 |
| H  | -4.946438 | 2.370009  | -2.862510 |
| C  | -0.751660 | 3.284951  | 1.758769  |
| H  | -1.719184 | 3.125828  | 2.302921  |
| H  | -0.883458 | 4.289407  | 1.268498  |
| O  | 0.333386  | 3.183834  | 2.542363  |
| C  | -1.657680 | -1.711487 | 0.671309  |
| H  | -1.949414 | -0.765455 | 1.126949  |
| C  | -2.582575 | -2.386474 | -0.130425 |
| H  | -2.402148 | -3.452825 | -0.283743 |
| C  | -4.008032 | -1.986203 | -0.173481 |

|    |           |           |           |
|----|-----------|-----------|-----------|
| C  | -4.997564 | -2.964812 | -0.344346 |
| C  | -4.407580 | -0.644717 | -0.060614 |
| C  | -6.348109 | -2.620270 | -0.381338 |
| H  | -4.702843 | -4.012873 | -0.445798 |
| C  | -5.755687 | -0.300864 | -0.098611 |
| H  | -3.657585 | 0.144813  | 0.028690  |
| C  | -6.733146 | -1.285805 | -0.255794 |
| H  | -7.103228 | -3.399345 | -0.509284 |
| H  | -6.040840 | 0.750257  | -0.014902 |
| H  | -7.790364 | -1.013081 | -0.287638 |
| C  | 0.280932  | -1.349785 | -2.101231 |
| H  | 1.172919  | -1.146076 | -2.693470 |
| C  | -0.879160 | -1.772431 | -2.370008 |
| C  | -2.187322 | -2.138045 | -2.314492 |
| H  | -2.464888 | -3.175275 | -2.520233 |
| H  | -2.941178 | -1.386184 | -2.569934 |
| Na | 1.941559  | 2.117216  | 3.371833  |
| H  | 4.512773  | -0.816610 | -4.290256 |
| H  | 5.850006  | -1.297752 | -0.227167 |
| C  | 4.088590  | 0.425074  | 0.954736  |
| H  | 4.092760  | 1.517324  | 1.092683  |
| H  | 3.152712  | 0.046946  | 1.392919  |
| H  | 4.919817  | -0.000507 | 1.531489  |
| C  | 2.533365  | 0.999817  | -3.828157 |
| H  | 2.464758  | 0.397875  | -4.744295 |
| H  | 1.520483  | 1.134697  | -3.422110 |
| H  | 2.905935  | 1.995901  | -4.117528 |

89

Figure\_S15-5\_9d(NaOPh)-Cu-allyl\_01 / electronic energy: -3597.06845638 a.u. / lowest freq: 14.75 cm<sup>-1</sup>

|    |           |           |           |
|----|-----------|-----------|-----------|
| Na | 1.466278  | -1.713895 | 0.568774  |
| H  | 4.895602  | -3.588713 | 0.817161  |
| H  | 4.692117  | -0.895972 | -2.541156 |
| O  | 3.335573  | -2.007938 | -0.584046 |
| C  | 5.271052  | -1.564621 | -1.896670 |
| C  | 4.600612  | -2.207337 | -0.820863 |
| H  | 7.102470  | -1.262094 | -2.980981 |
| C  | 6.625148  | -1.776136 | -2.141098 |
| C  | 5.384324  | -3.077572 | -0.017672 |
| C  | 7.377630  | -2.634567 | -1.334758 |
| C  | 6.737508  | -3.280572 | -0.272517 |
| H  | 8.439672  | -2.798024 | -1.529682 |
| H  | 7.306712  | -3.957090 | 0.372185  |
| H  | 1.822369  | -0.807067 | 3.943134  |
| H  | -2.251641 | -0.329887 | 3.139589  |
| C  | 0.449649  | -2.296353 | 3.162582  |
| C  | -1.148749 | -0.342683 | 3.068826  |
| H  | 0.743177  | -3.269591 | 2.747587  |
| C  | -0.656265 | -1.681110 | 2.668089  |
| H  | -0.722254 | 0.025625  | 4.016197  |
| B  | -1.373536 | -2.298457 | 1.423828  |
| O  | -2.713492 | -2.319048 | 1.179742  |
| H  | -1.727987 | -0.728011 | -0.976153 |
| O  | -0.646091 | -2.774963 | 0.347830  |
| H  | -0.369549 | -1.436810 | -1.877879 |
| C  | -1.416767 | -1.592283 | -1.578998 |
| H  | -3.924597 | -1.288533 | -0.925882 |
| C  | -1.545189 | -2.887384 | -0.779148 |
| C  | -2.937112 | -3.023746 | -0.060716 |
| C  | -4.089317 | -2.364956 | -0.799421 |
| H  | -2.035120 | -1.618693 | -2.487150 |
| H  | -5.022038 | -2.500680 | -0.233511 |
| H  | -2.452907 | -4.961768 | 0.822840  |
| H  | -4.156010 | -4.465844 | 0.969667  |
| C  | -3.284310 | -4.466581 | 0.300122  |
| H  | -0.161528 | -3.891634 | -2.091822 |
| C  | -1.138452 | -4.082032 | -1.624394 |
| H  | -1.058778 | -4.996627 | -1.023531 |
| H  | -4.221693 | -2.822726 | -1.791255 |
| H  | -3.534901 | -5.053460 | -0.594647 |
| H  | -1.873021 | -4.249881 | -2.425820 |
| H  | 2.084171  | -2.447422 | 4.577693  |
| C  | 1.310104  | -1.734587 | 4.260318  |
| H  | 0.715848  | -1.463962 | 5.150374  |
| C  | 0.319514  | 2.875268  | -1.993392 |
| H  | 1.033917  | 2.506723  | -2.740473 |
| C  | -1.127654 | 2.540540  | -2.354801 |
| H  | -1.705390 | 3.414017  | -2.684987 |
| C  | -0.661312 | 1.729692  | -0.210974 |
| C  | -3.004911 | 1.645974  | -0.933491 |
| C  | -3.559642 | 1.488554  | 0.340873  |
| C  | -3.804764 | 1.434619  | -2.061581 |
| C  | -4.882144 | 1.072030  | 0.498446  |
| C  | -5.140732 | 1.044490  | -1.923628 |
| C  | -5.665477 | 0.864801  | -0.641218 |
| H  | -6.706703 | 0.550845  | -0.526471 |
| Cu | -0.836713 | 0.775737  | 1.479326  |
| N  | 0.481016  | 2.176611  | -0.718861 |
| N  | -1.650734 | 2.012129  | -1.089715 |
| H  | 2.605203  | -0.823585 | -1.253202 |

|   |           |           |           |
|---|-----------|-----------|-----------|
| H | -1.180566 | 1.768453  | -3.138589 |
| H | 0.488311  | 3.954711  | -1.852253 |
| C | 1.783728  | 1.989569  | -0.103034 |
| H | 1.577644  | 1.419376  | 0.818373  |
| C | 2.387717  | 3.326050  | 0.305028  |
| C | 3.684660  | 3.715190  | -0.041325 |
| C | 1.611056  | 4.193427  | 1.085504  |
| C | 4.194290  | 4.943729  | 0.386120  |
| H | 4.319736  | 3.066305  | -0.646305 |
| C | 2.116435  | 5.418098  | 1.511249  |
| H | 0.594881  | 3.899472  | 1.363203  |
| C | 3.414073  | 5.797630  | 1.161301  |
| H | 5.210992  | 5.230395  | 0.108577  |
| H | 1.496950  | 6.078282  | 2.122170  |
| H | 3.815380  | 6.756940  | 1.495184  |
| C | 2.667582  | 1.110708  | -0.990647 |
| H | 3.584280  | 0.863576  | -0.424765 |
| H | 2.991597  | 1.684656  | -1.881421 |
| O | 1.975771  | -0.040827 | -1.362266 |
| C | -5.977773 | 0.764471  | -3.144325 |
| H | -5.678591 | 1.395447  | -3.993282 |
| H | -5.860945 | -0.286000 | -3.456591 |
| H | -7.045661 | 0.932149  | -2.946707 |
| C | -5.429241 | 0.820029  | 1.877761  |
| H | -6.526964 | 0.864113  | 1.893808  |
| H | -5.127045 | -0.182053 | 2.222954  |
| H | -5.039940 | 1.546746  | 2.605212  |
| H | -2.959357 | 1.704718  | 1.226933  |
| H | -3.392248 | 1.559302  | -3.063750 |

121

Figure\_S15-5\_AA-9d(NaOPh)-ts(1,6major)\_01 / electronic energy: -4439.05034678 a.u. / lowest freq: -323.92 cm-1

|    |           |           |           |
|----|-----------|-----------|-----------|
| H  | 1.531852  | 2.790146  | -2.844247 |
| H  | 0.412404  | 0.668919  | -2.120806 |
| C  | 2.797337  | 1.816802  | -1.391465 |
| C  | 1.106764  | 0.026893  | -1.562237 |
| H  | 3.863212  | 2.053348  | -1.431478 |
| C  | 2.443015  | 0.473043  | -1.394451 |
| H  | 0.980905  | -1.042579 | -1.772976 |
| B  | 3.549881  | -0.575461 | -1.074372 |
| O  | 3.441876  | -1.912723 | -1.338260 |
| H  | 5.931808  | -1.231726 | -2.662388 |
| O  | 4.741925  | -0.257658 | -0.472719 |
| H  | 7.060334  | -0.324564 | -1.628083 |
| C  | 6.504967  | -1.268332 | -1.724530 |
| H  | 5.229237  | -3.418982 | -2.572010 |
| C  | 5.584466  | -1.424315 | -0.514875 |
| C  | 4.533680  | -2.583052 | -0.684149 |
| C  | 5.003175  | -3.742626 | -1.548148 |
| H  | 7.229857  | -2.091893 | -1.788292 |
| H  | 4.215154  | -4.506333 | -1.598906 |
| H  | 3.651512  | -2.278459 | 1.288468  |
| H  | 3.127599  | -3.747121 | 0.434681  |
| C  | 3.993170  | -3.103209 | 0.645751  |
| H  | 7.113959  | -0.653716 | 0.796776  |
| C  | 6.403413  | -1.492079 | 0.764517  |
| H  | 5.765500  | -1.434395 | 1.655594  |
| H  | 5.903640  | -4.204201 | -1.116173 |
| H  | 4.745148  | -3.690144 | 1.191751  |
| H  | 6.978935  | -2.428896 | 0.803870  |
| H  | 2.263621  | 3.895688  | -1.653947 |
| C  | 1.835048  | 2.893134  | -1.787389 |
| H  | 0.911582  | 2.826075  | -1.190317 |
| C  | -3.316186 | -2.155874 | -1.398300 |
| H  | -4.156754 | -2.422195 | -0.742036 |
| C  | -3.526707 | -0.799318 | -2.066112 |
| H  | -3.326121 | -0.836908 | -3.148082 |
| C  | -1.704143 | -0.654114 | -0.602983 |
| C  | -2.484833 | 1.435382  | -1.641874 |
| C  | -1.809491 | 2.309622  | -0.779549 |
| C  | -3.152709 | 1.955574  | -2.751481 |
| C  | -1.767565 | 3.677195  | -1.042649 |
| C  | -3.141830 | 3.329489  | -3.019984 |
| C  | -2.438441 | 4.176874  | -2.166502 |
| H  | -2.413719 | 5.251094  | -2.370520 |
| Cu | 0.006515  | -0.027793 | 0.205264  |
| N  | -2.104610 | -1.925704 | -0.604990 |
| N  | -2.531322 | 0.048634  | -1.397788 |
| C  | 1.290145  | 0.606135  | 1.703137  |
| C  | 0.072517  | 0.119888  | 2.333086  |
| H  | -3.772351 | -2.876610 | 1.379068  |
| H  | -4.536850 | -0.400204 | -1.902121 |
| H  | -3.165656 | -2.967768 | -2.123805 |
| H  | 2.089341  | -0.139005 | 1.673567  |
| C  | -1.064345 | 0.956159  | 2.742909  |
| C  | 0.072792  | -1.253207 | 2.856704  |
| O  | -0.865063 | 2.269668  | 2.563347  |
| O  | -2.126197 | 0.558475  | 3.193476  |
| O  | -0.778040 | -1.764397 | 3.566541  |
| O  | 1.144058  | -1.974137 | 2.479366  |

|    |           |           |           |
|----|-----------|-----------|-----------|
| C  | 1.222875  | -3.294105 | 2.994442  |
| H  | 1.319956  | -3.281337 | 4.088911  |
| H  | 2.111922  | -3.745191 | 2.543777  |
| H  | 0.326134  | -3.872662 | 2.730344  |
| C  | -1.948725 | 3.133843  | 2.880121  |
| H  | -2.757723 | 3.021644  | 2.142576  |
| H  | -1.545574 | 4.150890  | 2.838491  |
| H  | -2.341646 | 2.921775  | 3.882390  |
| C  | -1.362628 | -3.015194 | 0.003200  |
| H  | -0.779124 | -2.571576 | 0.823411  |
| C  | -0.383693 | -3.671350 | -0.965527 |
| C  | 0.492411  | -4.657421 | -0.493098 |
| C  | -0.310138 | -3.311832 | -2.314249 |
| C  | 1.403379  | -5.275553 | -1.345862 |
| H  | 0.475264  | -4.942237 | 0.561573  |
| C  | 0.603113  | -3.927137 | -3.170944 |
| H  | -0.954685 | -2.525176 | -2.709034 |
| C  | 1.461414  | -4.913066 | -2.691690 |
| H  | 2.078891  | -6.038961 | -0.953216 |
| H  | 0.646441  | -3.624325 | -4.219179 |
| H  | 2.179335  | -5.391531 | -3.361013 |
| C  | -2.317716 | -4.042085 | 0.638678  |
| H  | -1.705482 | -4.860969 | 1.043526  |
| H  | -2.944550 | -4.492864 | -0.154612 |
| O  | -3.079136 | -3.526747 | 1.679268  |
| C  | 1.706295  | 1.923543  | 1.411283  |
| H  | 1.000152  | 2.739469  | 1.544959  |
| C  | 2.975350  | 2.175312  | 0.914239  |
| H  | 3.702124  | 1.361087  | 0.943297  |
| C  | 3.574831  | 3.519582  | 0.821940  |
| C  | 4.958519  | 3.630495  | 0.603164  |
| C  | 2.828916  | 4.704466  | 0.931775  |
| C  | 5.574376  | 4.874565  | 0.496418  |
| H  | 5.551401  | 2.716561  | 0.507877  |
| C  | 3.443320  | 5.949760  | 0.823856  |
| H  | 1.751275  | 4.657613  | 1.094795  |
| C  | 4.818571  | 6.042924  | 0.605105  |
| H  | 6.651842  | 4.933812  | 0.326072  |
| H  | 2.841462  | 6.857418  | 0.910511  |
| H  | 5.298290  | 7.020266  | 0.519104  |
| C  | -3.895631 | 3.862314  | -4.210348 |
| H  | -3.611585 | 3.331642  | -5.131537 |
| H  | -4.979789 | 3.722745  | -4.076124 |
| H  | -3.708280 | 4.934164  | -4.360492 |
| C  | -1.017767 | 4.615813  | -0.135240 |
| H  | -0.476459 | 4.064653  | 0.643801  |
| H  | -0.285848 | 5.209369  | -0.703696 |
| H  | -1.702311 | 5.323228  | 0.357787  |
| H  | -1.322372 | 1.929538  | 0.118541  |
| H  | -3.705789 | 1.299131  | -3.423292 |
| O  | -4.649250 | -1.533846 | 1.626024  |
| Na | -3.032395 | -1.546919 | 3.183395  |
| C  | -5.240819 | -0.644347 | 0.889136  |
| C  | -4.783849 | 0.701559  | 0.828275  |
| C  | -6.367852 | -0.961991 | 0.080743  |
| C  | -5.390210 | 1.642867  | 0.004416  |
| H  | -3.911075 | 0.968243  | 1.431189  |
| C  | -6.970611 | -0.008573 | -0.737110 |
| H  | -6.749076 | -1.987051 | 0.114924  |
| C  | -6.489206 | 1.303127  | -0.792408 |
| H  | -4.982268 | 2.657726  | -0.034847 |
| H  | -7.831630 | -0.296643 | -1.348353 |
| H  | -6.957778 | 2.044331  | -1.443532 |

121

Figure\_S15-5\_AA-9d(NaO<sub>Ph</sub>)-ts(1,6major)\_02 / electronic energy: -4439.05088590 a.u. / lowest freq: -338.66 cm<sup>-1</sup>

|   |          |           |           |
|---|----------|-----------|-----------|
| H | 1.755897 | 2.589666  | -2.870519 |
| H | 0.496732 | 0.572282  | -2.130016 |
| C | 2.941573 | 1.546113  | -1.400691 |
| C | 1.135981 | -0.124094 | -1.571108 |
| H | 4.021053 | 1.709516  | -1.435760 |
| C | 2.500831 | 0.226266  | -1.398872 |
| H | 0.929871 | -1.177266 | -1.796614 |
| B | 3.568194 | -0.859344 | -1.058929 |
| O | 3.444573 | -2.204039 | -1.292790 |
| H | 5.961338 | -1.580020 | -2.617799 |
| O | 4.763550 | -0.551410 | -0.459043 |
| H | 7.089315 | -0.665243 | -1.590270 |
| C | 6.525029 | -1.604894 | -1.673905 |
| H | 5.206763 | -3.754731 | -2.500092 |
| C | 5.591915 | -1.726202 | -0.469673 |
| C | 4.529886 | -2.876064 | -0.623024 |
| C | 4.999448 | -4.053245 | -1.464898 |
| H | 7.242231 | -2.436424 | -1.714661 |
| H | 4.230600 | -4.838717 | -1.482143 |
| H | 3.615090 | -2.539550 | 1.331164  |
| H | 3.131688 | -4.043304 | 0.510227  |
| C | 3.979444 | -3.372669 | 0.711888  |
| H | 7.118694 | -0.946040 | 0.838495  |
| C | 6.398245 | -1.776184 | 0.818589  |

|    |           |           |           |
|----|-----------|-----------|-----------|
| H  | 5.752966  | -1.689902 | 1.702037  |
| H  | 5.912730  | -4.489741 | -1.033952 |
| H  | 4.734055  | -3.933425 | 1.280733  |
| H  | 6.961829  | -2.718609 | 0.884568  |
| H  | 2.557024  | 3.654096  | -1.687535 |
| C  | 2.059422  | 2.682855  | -1.812816 |
| H  | 1.130228  | 2.688147  | -1.222122 |
| C  | -3.609547 | -1.849831 | -1.375124 |
| H  | -4.509146 | -1.972048 | -0.754668 |
| C  | -3.598139 | -0.507666 | -2.101865 |
| H  | -3.409307 | -0.629104 | -3.178597 |
| C  | -1.794791 | -0.588269 | -0.603491 |
| C  | -2.217616 | 1.547110  | -1.751383 |
| C  | -1.570562 | 2.378965  | -0.828259 |
| C  | -2.657718 | 2.081795  | -2.962721 |
| C  | -1.336086 | 3.720015  | -1.125270 |
| C  | -2.444953 | 3.430096  | -3.272989 |
| C  | -1.778166 | 4.234611  | -2.350950 |
| H  | -1.602951 | 5.289227  | -2.581777 |
| Cu | -0.021835 | -0.087811 | 0.180314  |
| N  | -2.414257 | -1.767139 | -0.533520 |
| N  | -2.478337 | 0.192650  | -1.461667 |
| C  | 1.324266  | 0.461148  | 1.663787  |
| C  | 0.084593  | 0.072118  | 2.318739  |
| H  | -4.166247 | -2.262079 | 1.551284  |
| H  | -4.528404 | 0.060236  | -1.961995 |
| H  | -3.536596 | -2.700817 | -2.067489 |
| H  | 2.063119  | -0.343046 | 1.619227  |
| C  | -0.926126 | 1.008720  | 2.826949  |
| C  | -0.044016 | -1.321053 | 2.765025  |
| O  | -0.662638 | 2.295581  | 2.552316  |
| O  | -1.938372 | 0.721060  | 3.443933  |
| O  | -0.942700 | -1.797637 | 3.437862  |
| O  | 0.956546  | -2.116301 | 2.334409  |
| C  | 0.897767  | -3.477227 | 2.734903  |
| H  | 0.857623  | -3.564012 | 3.828863  |
| H  | 1.808888  | -3.945775 | 2.351738  |
| H  | 0.015523  | -3.975341 | 2.307478  |
| C  | -1.598218 | 3.255414  | 3.025702  |
| H  | -2.556569 | 3.161624  | 2.494670  |
| H  | -1.153633 | 4.235622  | 2.825073  |
| H  | -1.772487 | 3.133159  | 4.102423  |
| C  | -1.892555 | -2.948241 | 0.149890  |
| H  | -1.219882 | -2.565902 | 0.926647  |
| C  | -1.079939 | -3.809979 | -0.803789 |
| C  | -1.678498 | -4.761795 | -1.639840 |
| C  | 0.303467  | -3.617855 | -0.893033 |
| C  | -0.914721 | -5.494004 | -2.548748 |
| H  | -2.753458 | -4.945797 | -1.589727 |
| C  | 1.065533  | -4.336072 | -1.812229 |
| H  | 0.794647  | -2.885450 | -0.245694 |
| C  | 0.459112  | -5.278614 | -2.641802 |
| H  | -1.400157 | -6.232187 | -3.190891 |
| H  | 2.133024  | -4.130612 | -1.885856 |
| H  | 1.057255  | -5.842879 | -3.360584 |
| C  | -2.999966 | -3.738420 | 0.860575  |
| H  | -2.522809 | -4.630540 | 1.296326  |
| H  | -3.732195 | -4.112333 | 0.120088  |
| O  | -3.633882 | -3.042026 | 1.879807  |
| C  | 1.837943  | 1.743809  | 1.376730  |
| H  | 1.193274  | 2.608993  | 1.504064  |
| C  | 3.126104  | 1.905656  | 0.891444  |
| H  | 3.797083  | 1.046287  | 0.933759  |
| C  | 3.817928  | 3.205866  | 0.806083  |
| C  | 5.205289  | 3.218862  | 0.582856  |
| C  | 3.159122  | 4.439630  | 0.930050  |
| C  | 5.909050  | 4.416298  | 0.486674  |
| H  | 5.729489  | 2.265283  | 0.474684  |
| C  | 3.861703  | 5.638491  | 0.833119  |
| H  | 2.081677  | 4.469451  | 1.098053  |
| C  | 5.239591  | 5.634566  | 0.610832  |
| H  | 6.987481  | 4.398709  | 0.312967  |
| H  | 3.327609  | 6.586272  | 0.932893  |
| H  | 5.787380  | 6.576321  | 0.534702  |
| C  | -2.931250 | 3.979456  | -4.588688 |
| H  | -2.431426 | 3.479993  | -5.433163 |
| H  | -4.012785 | 3.813877  | -4.708393 |
| H  | -2.739536 | 5.057825  | -4.671737 |
| C  | -0.636046 | 4.619939  | -0.142598 |
| H  | -0.211133 | 4.042726  | 0.687715  |
| H  | 0.180949  | 5.173670  | -0.629117 |
| H  | -1.332012 | 5.362101  | 0.278872  |
| H  | -1.272383 | 1.989004  | 0.146170  |
| H  | -3.178618 | 1.454173  | -3.686457 |
| O  | -4.696192 | -0.764358 | 1.746223  |
| Na | -3.167251 | -1.180651 | 3.346452  |
| C  | -5.191358 | 0.108352  | 0.925300  |
| C  | -4.573751 | 1.370932  | 0.712314  |
| C  | -6.370961 | -0.147694 | 0.171198  |

|   |           |           |           |
|---|-----------|-----------|-----------|
| C | -5.084490 | 2.293069  | -0.194206 |
| H | -3.653081 | 1.582277  | 1.262986  |
| C | -6.876546 | 0.784725  | -0.731380 |
| H | -6.872880 | -1.108756 | 0.318592  |
| C | -6.241316 | 2.014887  | -0.930215 |
| H | -4.557360 | 3.240169  | -0.344965 |
| H | -7.784383 | 0.545701  | -1.293991 |
| H | -6.636061 | 2.739947  | -1.645251 |

121

Figure\_S15-5\_AA-9d(Na0Ph)-ts(1,6minor)\_01 / electronic energy: -4439.04244814 a.u. / lowest freq: -345.54 cm-1

|    |           |           |           |
|----|-----------|-----------|-----------|
| H  | 3.639728  | 4.266447  | -2.509121 |
| H  | 5.388690  | 3.936274  | -2.539873 |
| C  | 4.570082  | 4.339701  | -1.927262 |
| H  | 4.776222  | 5.400836  | -1.728982 |
| H  | 2.364214  | 5.468895  | -1.006152 |
| B  | 2.946946  | 1.894371  | -0.984115 |
| O  | 4.293598  | 2.156885  | -1.001008 |
| C  | 2.635293  | 5.247525  | 0.033642  |
| C  | 4.477675  | 3.534750  | -0.631232 |
| O  | 2.228194  | 2.907443  | -0.407684 |
| H  | 3.388991  | 5.976410  | 0.366474  |
| H  | 1.738813  | 5.376955  | 0.653905  |
| C  | 3.165161  | 3.830546  | 0.181425  |
| H  | 6.626681  | 3.451917  | -0.482954 |
| C  | 5.765733  | 3.668006  | 0.165820  |
| H  | 5.877723  | 4.691673  | 0.552952  |
| H  | 5.792510  | 2.967929  | 1.010573  |
| C  | 3.287985  | 3.458197  | 1.657553  |
| H  | 2.289341  | 3.473404  | 2.113079  |
| H  | 3.696833  | 2.444975  | 1.785362  |
| C  | 3.930670  | 4.164046  | 2.201901  |
| C  | 2.344424  | 0.558122  | -1.513129 |
| C  | 3.244296  | -0.471752 | -1.760560 |
| H  | 4.297714  | -0.202782 | -1.866445 |
| H  | 2.376696  | -1.689252 | -3.316210 |
| H  | 2.021748  | -2.231701 | -1.672481 |
| C  | 2.809661  | -1.795115 | -2.305954 |
| H  | 3.640762  | -2.510413 | -2.366520 |
| H  | 0.349399  | 1.306102  | -1.583391 |
| C  | 0.940349  | 0.383521  | -1.566859 |
| H  | 0.547632  | -0.401635 | -2.226292 |
| C  | -3.614220 | -1.436651 | -1.707166 |
| H  | -4.558500 | -1.603409 | -1.169716 |
| C  | -3.475933 | 0.016005  | -2.162540 |
| H  | -3.158367 | 0.086578  | -3.214195 |
| C  | -1.815917 | -0.459907 | -0.576082 |
| C  | -2.076995 | 1.881767  | -1.217845 |
| C  | -2.179560 | 2.678147  | -2.359662 |
| C  | -1.637515 | 2.439404  | -0.015250 |
| C  | -1.811119 | 4.026238  | -2.319131 |
| C  | -1.257322 | 3.780004  | 0.042553  |
| C  | -1.345121 | 4.560160  | -1.114540 |
| H  | -1.054752 | 5.613692  | -1.071678 |
| Cu | 0.021547  | -0.275248 | 0.211713  |
| N  | -2.471127 | -1.596063 | -0.805778 |
| N  | -2.420161 | 0.516994  | -1.277159 |
| C  | 1.619020  | -0.416432 | 1.536495  |
| C  | 0.388120  | -0.614149 | 2.281369  |
| H  | -4.254887 | -1.851371 | 1.232830  |
| H  | -4.400194 | 0.594738  | -2.026733 |
| H  | -3.551685 | -2.148288 | -2.542100 |
| H  | 1.990119  | 0.612563  | 1.576943  |
| C  | -0.154234 | 0.525396  | 3.047909  |
| C  | -0.166797 | -1.917443 | 2.653295  |
| O  | 0.746251  | 1.487446  | 3.282294  |
| O  | -1.293425 | 0.625514  | 3.473233  |
| O  | -1.125458 | -2.114787 | 3.383925  |
| O  | 0.481878  | -2.958188 | 2.105610  |
| C  | 0.028763  | -4.260130 | 2.446375  |
| H  | 0.169204  | -4.451895 | 3.518867  |
| H  | 0.636610  | -4.953092 | 1.854504  |
| H  | -1.034509 | -4.386019 | 2.200285  |
| C  | 0.350759  | 2.533149  | 4.158963  |
| H  | -0.601945 | 2.977477  | 3.847655  |
| H  | 1.149643  | 3.281838  | 4.124912  |
| H  | 0.245316  | 2.147352  | 5.183117  |
| C  | -2.145968 | -2.875864 | -0.191980 |
| H  | -1.433247 | -2.633400 | 0.604049  |
| C  | -1.450638 | -3.815921 | -1.160249 |
| C  | -2.151766 | -4.579109 | -2.102145 |
| C  | -0.055575 | -3.918105 | -1.118897 |
| C  | -1.469672 | -5.416331 | -2.985435 |
| H  | -3.241900 | -4.530999 | -2.153245 |
| C  | 0.628323  | -4.755514 | -1.998085 |
| H  | 0.498624  | -3.331243 | -0.381614 |
| C  | -0.078822 | -5.507119 | -2.936148 |
| H  | -2.031277 | -6.004778 | -3.714209 |
| H  | 1.717787  | -4.819200 | -1.949024 |
| H  | 0.453548  | -6.164963 | -3.626338 |

|    |           |           |           |
|----|-----------|-----------|-----------|
| C  | -3.373630 | -3.498926 | 0.487793  |
| H  | -3.059163 | -4.474046 | 0.893392  |
| H  | -4.154179 | -3.719565 | -0.265879 |
| O  | -3.872841 | -2.729916 | 1.530714  |
| C  | 2.534770  | -1.365870 | 1.032272  |
| H  | 2.267257  | -2.418633 | 1.073708  |
| C  | 3.740545  | -0.992813 | 0.458348  |
| H  | 4.077791  | 0.036735  | 0.598278  |
| C  | 4.826988  | -1.945844 | 0.159574  |
| C  | 6.120854  | -1.451193 | -0.074036 |
| C  | 4.627918  | -3.334162 | 0.081078  |
| C  | 7.177623  | -2.307834 | -0.371284 |
| H  | 6.291329  | -0.371991 | -0.026902 |
| C  | 5.684061  | -4.191939 | -0.217170 |
| H  | 3.633555  | -3.754841 | 0.244418  |
| C  | 6.964399  | -3.684816 | -0.444924 |
| H  | 8.174285  | -1.896599 | -0.547198 |
| H  | 5.504742  | -5.268034 | -0.275536 |
| H  | 7.790074  | -4.359898 | -0.680124 |
| C  | -0.776633 | 4.361166  | 1.342263  |
| H  | 0.153973  | 3.863921  | 1.652413  |
| H  | -0.582673 | 5.439156  | 1.259246  |
| H  | -1.519812 | 4.209758  | 2.139606  |
| C  | -1.892147 | 4.867174  | -3.566459 |
| H  | -1.725800 | 5.930771  | -3.347882 |
| H  | -1.133156 | 4.551414  | -4.299404 |
| H  | -2.874483 | 4.764445  | -4.051188 |
| H  | -2.532390 | 2.248215  | -3.298760 |
| H  | -1.625997 | 1.825902  | 0.889153  |
| O  | -4.504684 | -0.277146 | 1.383540  |
| Na | -3.012642 | -0.835028 | 2.941519  |
| C  | -5.288857 | 0.439548  | 0.638436  |
| C  | -5.075086 | 1.830932  | 0.443259  |
| C  | -6.396510 | -0.128864 | -0.050101 |
| C  | -5.871997 | 2.577126  | -0.418438 |
| H  | -4.236909 | 2.300536  | 0.963436  |
| C  | -7.188017 | 0.628250  | -0.909648 |
| H  | -6.607399 | -1.191597 | 0.105874  |
| C  | -6.933041 | 1.987567  | -1.114437 |
| H  | -5.655926 | 3.640806  | -0.556725 |
| H  | -8.022943 | 0.147865  | -1.429036 |
| H  | -7.554034 | 2.577573  | -1.791891 |

121

Figure\_S15-5\_AA-9d(NaOPh)-ts(1,6minor)\_02 / electronic energy: -4439.04486199 a.u. / lowest freq: -347.74 cm<sup>-1</sup>

|    |           |           |           |
|----|-----------|-----------|-----------|
| H  | -1.879353 | -2.590285 | 0.942378  |
| H  | -0.498727 | 0.922645  | 1.738733  |
| C  | -3.275758 | -0.962592 | 1.157853  |
| C  | -1.032375 | 0.004756  | 1.465123  |
| H  | -4.349623 | -0.770095 | 1.197223  |
| C  | -2.427173 | 0.136121  | 1.250751  |
| H  | -0.689216 | -0.880883 | 2.016152  |
| B  | -3.043849 | 1.550765  | 1.030311  |
| O  | -2.410120 | 2.727991  | 1.322528  |
| H  | -3.046105 | 3.069082  | -1.425914 |
| O  | -4.302638 | 1.751737  | 0.519213  |
| H  | -4.742295 | 2.727790  | -1.844766 |
| C  | -4.087704 | 3.359765  | -1.227380 |
| H  | -2.171105 | 4.858350  | -0.229659 |
| C  | -4.443534 | 3.157703  | 0.244906  |
| C  | -3.383637 | 3.784557  | 1.221653  |
| C  | -2.708035 | 5.044197  | 0.707289  |
| H  | -4.224388 | 4.405620  | -1.536838 |
| H  | -1.976927 | 5.401855  | 1.446262  |
| H  | -4.441842 | 3.122051  | 3.013684  |
| H  | -3.105092 | 4.261323  | 3.302270  |
| C  | -3.937848 | 4.019696  | 2.626649  |
| H  | -6.546412 | 3.095104  | -0.226851 |
| C  | -5.881491 | 3.576121  | 0.505071  |
| H  | -6.212931 | 3.283846  | 1.509443  |
| H  | -3.450617 | 5.838813  | 0.540916  |
| H  | -4.650881 | 4.855865  | 2.643007  |
| H  | -5.991445 | 4.665696  | 0.399976  |
| H  | -3.571403 | -3.101422 | 1.199794  |
| C  | -2.815291 | -2.351887 | 1.475389  |
| H  | -2.602854 | -2.464988 | 2.553298  |
| C  | 3.756434  | -0.579894 | 2.000533  |
| H  | 4.702939  | -0.830560 | 1.501651  |
| C  | 3.470966  | 0.920950  | 1.956127  |
| H  | 3.180362  | 1.313416  | 2.942908  |
| C  | 1.853732  | -0.202508 | 0.690740  |
| C  | 1.822608  | 2.249193  | 0.609569  |
| C  | 1.054405  | 2.363337  | -0.555956 |
| C  | 2.097347  | 3.392005  | 1.362163  |
| C  | 0.532796  | 3.595116  | -0.947099 |
| C  | 1.598629  | 4.641233  | 0.976176  |
| C  | 0.813379  | 4.727044  | -0.172493 |
| H  | 0.409626  | 5.696918  | -0.476430 |
| Cu | 0.102280  | -0.540954 | -0.194366 |
| N  | 2.624182  | -1.133459 | 1.251048  |

|    |           |           |           |
|----|-----------|-----------|-----------|
| N  | 2.338597  | 1.005512  | 1.025541  |
| C  | -1.188084 | -0.906154 | -1.780477 |
| C  | 0.141383  | -1.371804 | -2.155389 |
| H  | 4.651567  | -2.344922 | -0.160556 |
| H  | 4.321199  | 1.503207  | 1.575431  |
| H  | 3.784363  | -0.977497 | 3.024996  |
| H  | -1.368621 | 0.150159  | -2.009409 |
| C  | 0.996543  | -0.523516 | -2.993123 |
| C  | 0.587641  | -2.755637 | -1.980165 |
| O  | 0.367530  | 0.563664  | -3.467268 |
| O  | 2.170643  | -0.718374 | -3.265600 |
| O  | 1.587143  | -3.270240 | -2.458408 |
| O  | -0.213616 | -3.476440 | -1.176579 |
| C  | 0.103384  | -4.848868 | -1.012432 |
| H  | 0.012649  | -5.385800 | -1.967001 |
| H  | -0.619665 | -5.240157 | -0.288453 |
| H  | 1.128403  | -4.976455 | -0.636080 |
| C  | 1.145149  | 1.448831  | -4.261177 |
| H  | 1.902757  | 1.958492  | -3.646889 |
| H  | 0.444080  | 2.181339  | -4.673596 |
| H  | 1.647953  | 0.906789  | -5.072511 |
| C  | 2.296486  | -2.547583 | 1.260176  |
| H  | 1.714485  | -2.731987 | 0.345316  |
| C  | 1.418673  | -2.936852 | 2.445823  |
| C  | 0.855878  | -4.219119 | 2.490192  |
| C  | 1.108682  | -2.043573 | 3.475103  |
| C  | 0.006101  | -4.595536 | 3.527179  |
| H  | 1.071210  | -4.935733 | 1.695014  |
| C  | 0.260865  | -2.417695 | 4.518470  |
| H  | 1.504169  | -1.027120 | 3.459323  |
| C  | -0.295515 | -3.693878 | 4.548549  |
| H  | -0.429311 | -5.597010 | 3.533020  |
| H  | 0.027053  | -1.697404 | 5.305137  |
| H  | -0.966418 | -3.984648 | 5.359488  |
| C  | 3.566144  | -3.408030 | 1.145952  |
| H  | 3.264083  | -4.462832 | 1.224789  |
| H  | 4.221081  | -3.211196 | 2.016453  |
| O  | 4.233207  | -3.243897 | -0.062541 |
| C  | -2.349843 | -1.659022 | -1.518361 |
| H  | -2.275111 | -2.745024 | -1.522232 |
| C  | -3.540148 | -1.063636 | -1.141144 |
| H  | -3.608717 | 0.024514  | -1.205935 |
| C  | -4.849106 | -1.746633 | -1.129005 |
| C  | -6.009679 | -0.975783 | -0.940128 |
| C  | -4.996049 | -3.133472 | -1.291137 |
| C  | -7.269650 | -1.566903 | -0.916540 |
| H  | -5.901705 | 0.101356  | -0.786373 |
| C  | -6.257548 | -3.725459 | -1.265374 |
| H  | -4.117616 | -3.763137 | -1.445449 |
| C  | -7.400636 | -2.947210 | -1.079388 |
| H  | -8.156727 | -0.946941 | -0.767012 |
| H  | -6.348931 | -4.806216 | -1.396381 |
| H  | -8.387621 | -3.414402 | -1.061084 |
| C  | 1.925629  | 5.863579  | 1.793576  |
| H  | 1.740091  | 5.688549  | 2.863687  |
| H  | 2.989355  | 6.128471  | 1.686213  |
| H  | 1.328921  | 6.730529  | 1.478249  |
| C  | -0.283589 | 3.720358  | -2.205795 |
| H  | -0.748210 | 2.764073  | -2.482024 |
| H  | -1.076156 | 4.474420  | -2.095812 |
| H  | 0.347753  | 4.043563  | -3.048184 |
| H  | 0.877587  | 1.489532  | -1.182724 |
| H  | 2.705176  | 3.326788  | 2.265049  |
| O  | 5.065038  | -1.055504 | -1.066122 |
| Na | 3.635294  | -2.216771 | -2.324872 |
| C  | 5.305292  | 0.202036  | -0.852053 |
| C  | 4.467751  | 1.224653  | -1.378211 |
| C  | 6.404944  | 0.636472  | -0.060344 |
| C  | 4.698986  | 2.568688  | -1.108584 |
| H  | 3.607562  | 0.918372  | -1.980600 |
| C  | 6.630159  | 1.986776  | 0.197850  |
| H  | 7.072685  | -0.127237 | 0.349446  |
| C  | 5.779547  | 2.970826  | -0.315584 |
| H  | 4.007757  | 3.318004  | -1.506983 |
| H  | 7.484334  | 2.277340  | 0.817399  |
| H  | 5.953728  | 4.027892  | -0.103336 |

121

Figure\_S15-5\_AA-9d(NaOPh)-ts(1,6minor)\_03 / electronic energy: -4439.04473040 a.u. / lowest freq: -309.80 cm-1

|   |           |           |           |
|---|-----------|-----------|-----------|
| H | -4.078356 | -4.099965 | -2.680075 |
| H | -5.773402 | -3.702640 | -2.312554 |
| C | -4.883436 | -4.231040 | -1.942346 |
| H | -5.120844 | -5.301714 | -1.870232 |
| H | -2.615701 | -5.562963 | -1.672664 |
| B | -2.930448 | -2.045249 | -0.958698 |
| O | -4.274689 | -2.243536 | -0.770212 |
| C | -2.673135 | -5.522935 | -0.577748 |
| C | -4.492796 | -3.652502 | -0.582584 |
| O | -2.194942 | -3.162163 | -0.657991 |
| H | -3.388685 | -6.283952 | -0.232811 |



|    |           |           |           |
|----|-----------|-----------|-----------|
| H  | -1.681977 | -5.778179 | -0.176438 |
| C  | -3.081792 | -4.142755 | -0.085319 |
| H  | -6.561763 | -3.466336 | -0.012275 |
| C  | -5.623987 | -3.849873 | 0.414708  |
| H  | -5.761941 | -4.918361 | 0.636902  |
| H  | -5.434257 | -3.316285 | 1.354466  |
| C  | -2.927712 | -4.063733 | 1.430948  |
| H  | -1.881502 | -4.269288 | 1.690307  |
| H  | -3.180983 | -3.064952 | 1.814942  |
| H  | -3.557005 | -4.807503 | 1.939258  |
| C  | -2.334196 | -0.695307 | -1.456632 |
| C  | -3.215493 | 0.359320  | -1.656777 |
| H  | -4.281586 | 0.123518  | -1.697084 |
| H  | -2.326213 | 1.542396  | -3.226385 |
| H  | -1.990242 | 2.132892  | -1.597106 |
| C  | -2.772152 | 1.670928  | -2.224491 |
| H  | -3.600439 | 2.385732  | -2.313411 |
| H  | -0.340916 | -1.469067 | -1.615725 |
| C  | -0.929203 | -0.542636 | -1.569029 |
| H  | -0.553826 | 0.248294  | -2.230209 |
| C  | 3.278417  | 1.941282  | -1.693006 |
| H  | 4.124540  | 2.259515  | -1.069832 |
| C  | 3.463781  | 0.514751  | -2.202242 |
| H  | 3.169253  | 0.411838  | -3.259104 |
| C  | 1.714628  | 0.557844  | -0.648146 |
| C  | 2.482155  | -1.646130 | -1.373413 |
| C  | 2.984925  | -2.346710 | -2.472889 |
| C  | 1.916764  | -2.351166 | -0.306657 |
| C  | 2.884797  | -3.740672 | -2.535151 |
| C  | 1.778785  | -3.737033 | -0.365678 |
| C  | 2.265210  | -4.421502 | -1.484275 |
| H  | 2.165076  | -5.509268 | -1.533294 |
| Cu | -0.009603 | 0.054701  | 0.216176  |
| N  | 2.066754  | 1.819347  | -0.877976 |
| N  | 2.544657  | -0.242124 | -1.345573 |
| C  | -1.540036 | 0.062453  | 1.601600  |
| C  | -0.286009 | 0.057079  | 2.325720  |
| H  | 3.527093  | 2.500240  | 1.249419  |
| H  | 4.493700  | 0.152559  | -2.077761 |
| H  | 3.149810  | 2.672284  | -2.502401 |
| H  | -2.028893 | -0.915270 | 1.564688  |
| C  | 0.144603  | -1.226530 | 2.927407  |
| C  | 0.370145  | 1.229534  | 2.912522  |
| O  | -0.872149 | -2.046100 | 3.200584  |
| O  | 1.291876  | -1.542767 | 3.197971  |
| O  | 1.359950  | 1.201867  | 3.629688  |
| O  | -0.226971 | 2.393047  | 2.630443  |
| C  | 0.361419  | 3.562451  | 3.194958  |
| H  | 0.331327  | 3.516932  | 4.292215  |
| H  | -0.249825 | 4.401567  | 2.843655  |
| H  | 1.402966  | 3.662341  | 2.857008  |
| C  | -0.573214 | -3.246521 | 3.899007  |
| H  | 0.065915  | -3.905617 | 3.297919  |
| H  | -1.535761 | -3.731166 | 4.092029  |
| H  | -0.065792 | -3.024327 | 4.847612  |
| C  | 1.414111  | 2.961475  | -0.267732 |
| H  | 0.839077  | 2.567096  | 0.581252  |
| C  | 0.428991  | 3.654782  | -1.196340 |
| C  | -0.469399 | 4.581444  | -0.650512 |
| C  | 0.362065  | 3.392795  | -2.566781 |
| C  | -1.396297 | 5.240565  | -1.453285 |
| H  | -0.451654 | 4.780759  | 0.424321  |
| C  | -0.560269 | 4.057745  | -3.375715 |
| H  | 1.014838  | 2.642020  | -3.014345 |
| C  | -1.441415 | 4.984206  | -2.824218 |
| H  | -2.092504 | 5.953073  | -1.005521 |
| H  | -0.598069 | 3.836066  | -4.444461 |
| H  | -2.168793 | 5.497496  | -3.456391 |
| C  | 2.455895  | 3.932112  | 0.315185  |
| H  | 1.916155  | 4.828626  | 0.659304  |
| H  | 3.118440  | 4.275867  | -0.505663 |
| O  | 3.162459  | 3.420459  | 1.394632  |
| C  | -2.329996 | 1.148052  | 1.159232  |
| H  | -1.925935 | 2.156342  | 1.235362  |
| C  | -3.583746 | 0.943593  | 0.604264  |
| H  | -4.038203 | -0.042530 | 0.724048  |
| C  | -4.538595 | 2.029755  | 0.323967  |
| C  | -5.888772 | 1.714152  | 0.098058  |
| C  | -4.155813 | 3.379270  | 0.248962  |
| C  | -6.822769 | 2.705921  | -0.189951 |
| H  | -6.202923 | 0.667498  | 0.143935  |
| C  | -5.088508 | 4.371611  | -0.039957 |
| H  | -3.110873 | 3.658046  | 0.394968  |
| C  | -6.426926 | 4.042471  | -0.261137 |
| H  | -7.867027 | 2.434822  | -0.361694 |
| H  | -4.765911 | 5.413912  | -0.099206 |
| H  | -7.156579 | 4.822273  | -0.489726 |
| C  | 1.107996  | -4.459126 | 0.770057  |
| H  | 0.080166  | -4.084595 | 0.889309  |

|    |          |           |           |
|----|----------|-----------|-----------|
| H  | 1.061668 | -5.542862 | 0.597036  |
| H  | 1.640267 | -4.281347 | 1.716791  |
| C  | 3.427984 | -4.478574 | -3.731143 |
| H  | 3.267811 | -5.561554 | -3.641904 |
| H  | 2.943430 | -4.137353 | -4.658754 |
| H  | 4.508469 | -4.301570 | -3.845558 |
| H  | 3.449864 | -1.812340 | -3.302733 |
| H  | 1.591379 | -1.815543 | 0.587066  |
| O  | 4.104665 | 0.967855  | 1.346450  |
| Na | 3.107818 | -0.126331 | 2.977446  |
| C  | 5.147141 | 0.560016  | 0.686993  |
| C  | 5.352865 | -0.814418 | 0.383359  |
| C  | 6.132624 | 1.464688  | 0.202486  |
| C  | 6.440650 | -1.239836 | -0.373068 |
| H  | 4.608954 | -1.539195 | 0.727156  |
| C  | 7.213100 | 1.027409  | -0.557913 |
| H  | 6.009032 | 2.526161  | 0.437453  |
| C  | 7.381437 | -0.327506 | -0.861186 |
| H  | 6.551073 | -2.305722 | -0.594187 |
| H  | 7.941820 | 1.759172  | -0.919752 |
| H  | 8.230580 | -0.665373 | -1.459048 |

121

Figure\_S15-5\_AA-9d(NaOPh)-ts(1,6minor)\_04 / electronic energy: -4439.04421454 a.u. / lowest freq: -323.67 cm-1

|    |           |           |           |
|----|-----------|-----------|-----------|
| H  | 3.095969  | 4.985623  | -2.047636 |
| H  | 4.866326  | 4.855899  | -2.183862 |
| C  | 4.041776  | 5.094434  | -1.497129 |
| H  | 4.145217  | 6.142319  | -1.182072 |
| H  | 1.763877  | 5.869620  | -0.337892 |
| B  | 2.749285  | 2.389918  | -0.810450 |
| O  | 4.058211  | 2.801289  | -0.826946 |
| C  | 2.123190  | 5.542810  | 0.646520  |
| C  | 4.099460  | 4.142137  | -0.302837 |
| O  | 1.941394  | 3.255615  | -0.122668 |
| H  | 2.822613  | 6.297497  | 1.035897  |
| H  | 1.262688  | 5.493331  | 1.327893  |
| C  | 2.798789  | 4.183513  | 0.574140  |
| H  | 6.247790  | 4.298185  | -0.229823 |
| C  | 5.396786  | 4.337314  | 0.465241  |
| H  | 5.406846  | 5.318653  | 0.962390  |
| H  | 5.539293  | 3.557841  | 1.224429  |
| C  | 3.016225  | 3.626312  | 1.980295  |
| H  | 2.040286  | 3.434277  | 2.445906  |
| H  | 3.564592  | 2.672574  | 1.951909  |
| H  | 3.583220  | 4.329464  | 2.606816  |
| C  | 2.275113  | 1.045415  | -1.439538 |
| C  | 3.257617  | 0.100404  | -1.710727 |
| H  | 4.290370  | 0.452774  | -1.768289 |
| H  | 2.475563  | -1.105439 | -3.318661 |
| H  | 2.209767  | -1.781191 | -1.708252 |
| C  | 2.938972  | -1.226381 | -2.324029 |
| H  | 3.831889  | -1.853806 | -2.441994 |
| H  | 0.207451  | 1.607636  | -1.505535 |
| C  | 0.893782  | 0.752102  | -1.540485 |
| H  | 0.588964  | -0.024604 | -2.253275 |
| C  | -3.139450 | -2.118594 | -1.693758 |
| H  | -3.959815 | -2.488622 | -1.063032 |
| C  | -3.408368 | -0.699103 | -2.189621 |
| H  | -3.115071 | -0.567802 | -3.243771 |
| C  | -1.646301 | -0.649411 | -0.657618 |
| C  | -2.597235 | 1.511990  | -1.309496 |
| C  | -3.183384 | 2.191108  | -2.376351 |
| C  | -2.090086 | 2.235232  | -0.222726 |
| C  | -3.246942 | 3.590366  | -2.380666 |
| C  | -2.122422 | 3.627354  | -0.217078 |
| C  | -2.704318 | 4.292881  | -1.305493 |
| H  | -2.739599 | 5.386160  | -1.305733 |
| Cu | 0.069509  | -0.107862 | 0.183526  |
| N  | -1.928329 | -1.930098 | -0.888024 |
| N  | -2.536594 | 0.104981  | -1.324695 |
| C  | 1.588385  | -0.041402 | 1.566860  |
| C  | 0.361179  | -0.333956 | 2.290860  |
| H  | -3.556408 | -3.064408 | 1.051426  |
| H  | -4.457568 | -0.398972 | -2.069236 |
| H  | -2.974604 | -2.833825 | -2.510502 |
| H  | 1.873496  | 1.014713  | 1.605415  |
| C  | -0.356813 | 0.860349  | 2.785942  |
| C  | 0.027235  | -1.637025 | 2.866738  |
| O  | -1.646821 | 0.641760  | 3.122715  |
| O  | 0.109728  | 1.979309  | 2.839249  |
| O  | -0.871136 | -1.864609 | 3.666043  |
| O  | 0.815889  | -2.639206 | 2.454956  |
| C  | 0.558604  | -3.920904 | 3.012356  |
| H  | 0.650463  | -3.897665 | 4.106474  |
| H  | 1.315799  | -4.591337 | 2.590667  |
| H  | -0.451632 | -4.263262 | 2.746329  |
| C  | -2.376900 | 1.750456  | 3.634446  |
| H  | -1.831163 | 2.233068  | 4.455629  |
| H  | -3.327759 | 1.346861  | 4.000887  |
| H  | -2.565997 | 2.489674  | 2.843829  |

|    |           |           |           |
|----|-----------|-----------|-----------|
| C  | -1.144294 | -3.023614 | -0.347007 |
| H  | -0.593417 | -2.605681 | 0.507699  |
| C  | -0.106052 | -3.562456 | -1.318869 |
| C  | 0.917922  | -4.378596 | -0.819964 |
| C  | -0.105302 | -3.250525 | -2.680555 |
| C  | 1.905938  | -4.882996 | -1.661372 |
| H  | 0.953292  | -4.607942 | 0.247660  |
| C  | 0.879091  | -3.761123 | -3.527822 |
| H  | -0.860765 | -2.579550 | -3.092080 |
| C  | 1.885969  | -4.580020 | -3.023259 |
| H  | 2.700612  | -5.509552 | -1.250351 |
| H  | 0.863289  | -3.503067 | -4.588852 |
| H  | 2.661562  | -4.970118 | -3.685393 |
| C  | -2.061266 | -4.113538 | 0.231941  |
| H  | -1.421177 | -4.939789 | 0.576912  |
| H  | -2.696570 | -4.531533 | -0.571868 |
| O  | -2.810137 | -3.664543 | 1.316653  |
| C  | 2.553711  | -0.936180 | 1.056646  |
| H  | 2.329013  | -2.000673 | 1.060543  |
| C  | 3.750125  | -0.499512 | 0.506983  |
| H  | 4.050593  | 0.534989  | 0.688173  |
| C  | 4.862991  | -1.407187 | 0.172200  |
| C  | 6.150445  | -0.875379 | -0.007931 |
| C  | 4.690907  | -2.791161 | 0.002057  |
| C  | 7.228163  | -1.692865 | -0.339752 |
| H  | 6.300862  | 0.201367  | 0.110464  |
| C  | 5.767370  | -3.609028 | -0.331098 |
| H  | 3.699400  | -3.235514 | 0.108221  |
| C  | 7.041940  | -3.066061 | -0.503352 |
| H  | 8.219528  | -1.253804 | -0.473612 |
| H  | 5.607506  | -4.681634 | -0.464356 |
| H  | 7.884109  | -3.709788 | -0.766674 |
| C  | -1.577038 | 4.405028  | 0.951011  |
| H  | -1.022450 | 5.289421  | 0.606227  |
| H  | -2.396308 | 4.767110  | 1.593726  |
| H  | -0.908342 | 3.788083  | 1.566812  |
| C  | -3.900101 | 4.305045  | -3.534931 |
| H  | -3.770165 | 5.393188  | -3.459662 |
| H  | -3.478512 | 3.974557  | -4.496171 |
| H  | -4.980553 | 4.093295  | -3.563710 |
| H  | -3.598604 | 1.640664  | -3.221633 |
| H  | -1.680194 | 1.699693  | 0.633307  |
| O  | -4.519130 | -1.735964 | 1.290583  |
| Na | -2.891348 | -1.425206 | 2.727466  |
| C  | -5.286897 | -0.954950 | 0.593211  |
| C  | -5.146611 | 0.459422  | 0.632268  |
| C  | -6.293401 | -1.461321 | -0.274923 |
| C  | -5.919678 | 1.294228  | -0.166573 |
| H  | -4.375654 | 0.885576  | 1.281434  |
| C  | -7.065777 | -0.615770 | -1.067335 |
| H  | -6.437739 | -2.545048 | -0.315647 |
| C  | -6.885999 | 0.770695  | -1.031970 |
| H  | -5.751900 | 2.374586  | -0.125005 |
| H  | -7.820869 | -1.047616 | -1.731238 |
| H  | -7.488576 | 1.428627  | -1.661741 |

121

Figure\_S15-5\_AA-9d(NaO<sub>4</sub>Ph)-ts(1,6minor)\_05 / electronic energy: -4439.04612350 a.u. / lowest freq: -325.20 cm<sup>-1</sup>

|    |           |           |           |
|----|-----------|-----------|-----------|
| C  | 3.280224  | -2.183566 | 1.587208  |
| H  | 4.004142  | -2.592082 | 0.867775  |
| C  | 3.680111  | -0.789141 | 2.057873  |
| H  | 3.582518  | -0.675975 | 3.149177  |
| C  | 1.734564  | -0.629761 | 0.769814  |
| C  | 2.804357  | 1.478988  | 1.485631  |
| C  | 3.714220  | 2.025101  | 2.395777  |
| C  | 2.021898  | 2.342433  | 0.706484  |
| C  | 3.833258  | 3.409437  | 2.556349  |
| C  | 2.092747  | 3.724178  | 0.885885  |
| C  | 3.008352  | 4.246962  | 1.807846  |
| H  | 3.074773  | 5.330306  | 1.942636  |
| Cu | -0.001261 | -0.109941 | -0.054383 |
| N  | 2.003821  | -1.924559 | 0.921942  |
| N  | 2.707022  | 0.077319  | 1.378180  |
| C  | -1.465306 | -0.092244 | -1.485865 |
| C  | -0.232297 | -0.407823 | -2.197445 |
| H  | 3.158125  | -3.043968 | -1.284763 |
| H  | 4.704266  | -0.526626 | 1.759656  |
| H  | 3.165515  | -2.898480 | 2.413956  |
| H  | -1.754355 | 0.960974  | -1.536455 |
| C  | 0.593931  | 0.699487  | -2.696289 |
| C  | 0.061979  | -1.722776 | -2.784511 |
| O  | 0.086090  | 1.913759  | -2.421177 |
| O  | 1.660330  | 0.610304  | -3.284866 |
| O  | 0.879562  | -1.951494 | -3.661078 |
| O  | -0.685299 | -2.723049 | -2.298991 |
| C  | -0.439554 | -4.017129 | -2.837494 |
| H  | -0.645267 | -4.036243 | -3.916451 |
| H  | -1.127816 | -4.693716 | -2.317933 |
| H  | 0.605932  | -4.302769 | -2.656464 |
| C  | 0.837459  | 3.025447  | -2.878758 |

|    |           |           |           |
|----|-----------|-----------|-----------|
| H  | 1.817483  | 3.066860  | -2.381864 |
| H  | 0.251788  | 3.913987  | -2.621295 |
| H  | 0.989808  | 2.974836  | -3.965451 |
| C  | 1.129474  | -2.983992 | 0.453930  |
| H  | 0.545350  | -2.560579 | -0.373640 |
| C  | 0.137117  | -3.448209 | 1.509795  |
| C  | -0.938406 | -4.253556 | 1.111336  |
| C  | 0.233508  | -3.085334 | 2.855048  |
| C  | -1.879025 | -4.702471 | 2.034040  |
| H  | -1.049681 | -4.520008 | 0.057261  |
| C  | -0.705819 | -3.537134 | 3.783703  |
| H  | 1.036240  | -2.425550 | 3.188960  |
| C  | -1.761820 | -4.349786 | 3.379111  |
| H  | -2.714191 | -5.322023 | 1.699814  |
| H  | -0.612317 | -3.241557 | 4.830938  |
| H  | -2.499963 | -4.696073 | 4.105319  |
| C  | 1.933425  | -4.149029 | -0.147072 |
| H  | 1.222649  | -4.966506 | -0.343595 |
| H  | 2.634480  | -4.537217 | 0.620018  |
| O  | 2.563054  | -3.840589 | -1.343424 |
| C  | -2.446736 | -0.985163 | -0.999682 |
| H  | -2.211768 | -2.046634 | -0.970756 |
| C  | -3.673705 | -0.554136 | -0.518118 |
| H  | -3.983013 | 0.469986  | -0.737731 |
| C  | -4.789679 | -1.469461 | -0.214412 |
| C  | -6.088511 | -0.948259 | -0.094357 |
| C  | -4.611371 | -2.848650 | -0.016076 |
| C  | -7.170690 | -1.771344 | 0.207532  |
| H  | -6.243996 | 0.125258  | -0.234219 |
| C  | -5.692619 | -3.672506 | 0.285885  |
| H  | -3.612428 | -3.284163 | -0.077799 |
| C  | -6.978070 | -3.140000 | 0.399422  |
| H  | -8.170509 | -1.340153 | 0.296486  |
| H  | -5.528362 | -4.741620 | 0.440093  |
| H  | -7.823805 | -3.788222 | 0.639154  |
| C  | 1.194608  | 4.642644  | 0.100549  |
| H  | 0.268938  | 4.129340  | -0.192385 |
| H  | 0.920283  | 5.525439  | 0.696278  |
| H  | 1.695196  | 5.008706  | -0.809905 |
| C  | 4.823480  | 3.963980  | 3.547399  |
| H  | 4.939709  | 5.050610  | 3.435371  |
| H  | 4.500101  | 3.764092  | 4.581235  |
| H  | 5.811871  | 3.497531  | 3.419856  |
| H  | 4.355028  | 1.379530  | 2.995261  |
| H  | 1.329387  | 1.942461  | -0.034811 |
| O  | 3.988582  | -1.691109 | -1.646176 |
| Na | 3.018298  | -1.214134 | -3.559530 |
| C  | 4.892555  | -0.952563 | -1.077611 |
| C  | 4.766877  | 0.463352  | -1.024810 |
| C  | 6.050405  | -1.505065 | -0.462974 |
| C  | 5.706448  | 1.256354  | -0.376470 |
| H  | 3.877050  | 0.912894  | -1.476256 |
| C  | 6.986824  | -0.699676 | 0.181209  |
| H  | 6.184008  | -2.590312 | -0.503591 |
| C  | 6.826773  | 0.688264  | 0.240222  |
| H  | 5.551627  | 2.338595  | -0.333617 |
| H  | 7.859520  | -1.165147 | 0.649594  |
| H  | 7.559035  | 1.314394  | 0.754623  |
| H  | -3.274924 | 5.025690  | 1.827329  |
| C  | -4.209194 | 5.066810  | 1.248507  |
| H  | -4.340612 | 6.089404  | 0.867720  |
| H  | -5.042339 | 4.839996  | 1.928659  |
| H  | -1.934633 | 5.850929  | 0.107105  |
| O  | -2.016491 | 3.216555  | 0.014379  |
| C  | -2.255312 | 5.460013  | -0.866801 |
| C  | -4.204967 | 4.043924  | 0.112902  |
| H  | -1.372963 | 5.412058  | -1.520943 |
| H  | -2.968278 | 6.168078  | -1.314665 |
| C  | -2.887555 | 4.083307  | -0.740864 |
| H  | -6.355095 | 4.106236  | -0.011491 |
| C  | -5.491720 | 4.143381  | -0.691132 |
| H  | -5.531508 | 5.095629  | -1.240630 |
| C  | -3.061395 | 3.455211  | -2.123156 |
| H  | -2.072364 | 3.292440  | -2.570878 |
| H  | -5.587078 | 3.318973  | -1.409074 |
| H  | -3.563261 | 2.478314  | -2.061445 |
| H  | -3.648774 | 4.104125  | -2.787618 |
| B  | -2.808393 | 2.364547  | 0.741895  |
| O  | -4.127335 | 2.739507  | 0.715542  |
| C  | -2.318072 | 1.060276  | 1.440222  |
| C  | -3.292671 | 0.103987  | 1.701012  |
| H  | -4.333656 | 0.436143  | 1.705362  |
| H  | -2.190143 | -1.742220 | 1.815327  |
| H  | -2.585515 | -1.038412 | 3.386278  |
| H  | -3.856239 | -1.849279 | 2.439705  |
| C  | -2.976019 | -1.197451 | 2.366077  |
| C  | -0.937628 | 0.791644  | 1.601304  |
| H  | -0.265212 | 1.657246  | 1.585275  |
| H  | -0.650071 | 0.031383  | 2.338408  |

121

Figure\_S15-5\_AA-9d(Na0Ph)-ts(1,6minor)\_06 / electronic energy: -4439.04259063 a.u. / lowest freq: -326.29 cm-1

|    |           |           |           |
|----|-----------|-----------|-----------|
| H  | -3.709092 | -4.336252 | -2.666080 |
| H  | -5.452256 | -4.040838 | -2.463817 |
| C  | -4.564665 | -4.484712 | -1.991157 |
| H  | -4.736651 | -5.564007 | -1.875906 |
| H  | -2.263181 | -5.658347 | -1.441460 |
| B  | -2.857672 | -2.118110 | -0.997729 |
| O  | -4.196385 | -2.398277 | -0.892504 |
| C  | -2.411614 | -5.545995 | -0.360334 |
| C  | -4.333156 | -3.808049 | -0.640409 |
| O  | -2.075453 | -3.166750 | -0.586416 |
| H  | -3.110081 | -6.323405 | -0.016785 |
| H  | -1.444071 | -5.713085 | 0.133693  |
| C  | -2.938151 | -4.163995 | -0.005992 |
| H  | -6.452618 | -3.763748 | -0.251358 |
| C  | -5.526410 | -4.038630 | 0.273333  |
| H  | -5.597193 | -5.099647 | 0.555312  |
| H  | -5.461520 | -3.435018 | 1.187405  |
| C  | -2.906137 | -3.961334 | 1.507073  |
| H  | -1.868394 | -4.047466 | 1.854043  |
| H  | -3.277319 | -2.965761 | 1.790900  |
| H  | -3.505221 | -4.720398 | 2.029078  |
| C  | -2.309573 | -0.751814 | -1.506011 |
| C  | -3.228470 | 0.263297  | -1.742228 |
| H  | -4.279956 | -0.020703 | -1.828409 |
| H  | -2.333701 | 1.484636  | -3.280949 |
| H  | -2.077931 | 2.081963  | -1.637976 |
| C  | -2.818035 | 1.592419  | -2.294547 |
| H  | -3.670449 | 2.274409  | -2.409836 |
| H  | -0.282915 | -1.440541 | -1.601192 |
| C  | -0.909739 | -0.539501 | -1.573279 |
| H  | -0.548107 | 0.264473  | -2.226619 |
| C  | 3.184442  | 1.982913  | -1.710649 |
| H  | 4.045151  | 2.318415  | -1.116921 |
| C  | 3.370117  | 0.551443  | -2.204638 |
| H  | 3.032042  | 0.424737  | -3.245946 |
| C  | 1.665741  | 0.597853  | -0.605370 |
| C  | 2.491995  | -1.610335 | -1.269115 |
| C  | 3.092309  | -2.328212 | -2.307004 |
| C  | 1.905098  | -2.303112 | -0.204644 |
| C  | 3.087726  | -3.726744 | -2.303339 |
| C  | 1.864953  | -3.696740 | -0.198479 |
| C  | 2.459977  | -4.398644 | -1.251733 |
| H  | 2.438061  | -5.491858 | -1.248281 |
| Cu | -0.076097 | 0.107346  | 0.236362  |
| N  | 1.998018  | 1.859694  | -0.858991 |
| N  | 2.495375  | -0.204819 | -1.300991 |
| C  | -1.664175 | 0.101218  | 1.572197  |
| C  | -0.436557 | 0.223484  | 2.328560  |
| H  | 3.663297  | 2.600483  | 1.134619  |
| H  | 4.409715  | 0.207844  | -2.118654 |
| H  | 3.025184  | 2.700336  | -2.526025 |
| H  | -2.083373 | -0.909033 | 1.553872  |
| C  | 0.064088  | -0.989579 | 3.015734  |
| C  | 0.038649  | 1.532126  | 2.790257  |
| O  | -0.908365 | -1.832736 | 3.358031  |
| O  | 1.231744  | -1.241409 | 3.272026  |
| O  | -0.474173 | 2.602680  | 2.523095  |
| O  | 1.135096  | 1.473329  | 3.576700  |
| C  | 1.600966  | 2.708885  | 4.122335  |
| H  | 2.073529  | 3.307332  | 3.331213  |
| H  | 2.341708  | 2.434442  | 4.881870  |
| H  | 0.773287  | 3.261388  | 4.585024  |
| C  | -0.536948 | -3.009565 | 4.063049  |
| H  | 0.114547  | -3.645306 | 3.449812  |
| H  | -1.471532 | -3.533758 | 4.287744  |
| H  | -0.013901 | -2.753300 | 4.994317  |
| C  | 1.360412  | 2.995066  | -0.216868 |
| H  | 0.829085  | 2.598866  | 0.657056  |
| C  | 0.322886  | 3.685897  | -1.084652 |
| C  | -0.609768 | 4.521075  | -0.454142 |
| C  | 0.241938  | 3.518958  | -2.469079 |
| C  | -1.582118 | 5.190292  | -1.192331 |
| H  | -0.581381 | 4.626639  | 0.633790  |
| C  | -0.731586 | 4.190383  | -3.210735 |
| H  | 0.921909  | 2.838616  | -2.983904 |
| C  | -1.644268 | 5.029981  | -2.577456 |
| H  | -2.302935 | 5.833012  | -0.681820 |
| H  | -0.783575 | 4.041324  | -4.291424 |
| H  | -2.410635 | 5.548458  | -3.157390 |
| C  | 2.414048  | 3.968637  | 0.337628  |
| H  | 1.874777  | 4.842390  | 0.733947  |
| H  | 3.035682  | 4.345563  | -0.500127 |
| O  | 3.175738  | 3.437681  | 1.371126  |
| C  | -2.503717 | 1.124246  | 1.079836  |
| H  | -2.158889 | 2.154585  | 1.158288  |
| C  | -3.721118 | 0.833313  | 0.482704  |
| H  | -4.120304 | -0.176602 | 0.603306  |

|    |           |           |           |
|----|-----------|-----------|-----------|
| C  | -4.732187 | 1.855833  | 0.159614  |
| C  | -6.049200 | 1.455712  | -0.120685 |
| C  | -4.430989 | 3.225972  | 0.093916  |
| C  | -7.029418 | 2.387007  | -0.454149 |
| H  | -6.298993 | 0.391535  | -0.082542 |
| C  | -5.409329 | 4.157751  | -0.241602 |
| H  | -3.412972 | 3.568912  | 0.284845  |
| C  | -6.714063 | 3.745113  | -0.517669 |
| H  | -8.046665 | 2.050314  | -0.667334 |
| H  | -5.149375 | 5.217848  | -0.293570 |
| H  | -7.479623 | 4.477524  | -0.782610 |
| C  | 1.190257  | -4.410319 | 0.941197  |
| H  | 0.160181  | -4.041396 | 1.055845  |
| H  | 1.151593  | -5.495786 | 0.777355  |
| H  | 1.720135  | -4.225961 | 1.888536  |
| C  | 3.755000  | -4.479476 | -3.424903 |
| H  | 3.599476  | -5.562698 | -3.330703 |
| H  | 3.364680  | -4.160615 | -4.403183 |
| H  | 4.839902  | -4.290889 | -3.430232 |
| H  | 3.569532  | -1.804604 | -3.136380 |
| H  | 1.475149  | -1.757457 | 0.637529  |
| O  | 4.340176  | 1.103112  | 1.176977  |
| Na | 2.866184  | 0.157032  | 2.468613  |
| C  | 5.324566  | 0.638206  | 0.467494  |
| C  | 5.488334  | -0.754834 | 0.233527  |
| C  | 6.276327  | 1.495988  | -0.148788 |
| C  | 6.500416  | -1.242487 | -0.587106 |
| H  | 4.771331  | -1.447885 | 0.683707  |
| C  | 7.282989  | 0.996269  | -0.970313 |
| H  | 6.188248  | 2.571575  | 0.031787  |
| C  | 7.406833  | -0.376228 | -1.206763 |
| H  | 6.577228  | -2.321014 | -0.754364 |
| H  | 7.987382  | 1.692974  | -1.434850 |
| H  | 8.196298  | -0.762377 | -1.854985 |

121

Figure\_S15-5\_AA-9d(NaO<sub>Ph</sub>)-ts(1,6minor)\_07 / electronic energy: -4439.04642717 a.u. / lowest freq: -374.30 cm<sup>-1</sup>

|    |           |           |           |
|----|-----------|-----------|-----------|
| H  | -3.454421 | 3.390575  | -0.945764 |
| H  | -2.521045 | 2.761050  | -2.327710 |
| C  | -2.802158 | 2.570947  | -1.277075 |
| C  | -3.455001 | 1.234622  | -1.112302 |
| H  | -4.546182 | 1.198679  | -1.103477 |
| C  | -1.393178 | 0.024052  | -1.681347 |
| C  | -2.782365 | 0.049015  | -1.399722 |
| B  | -3.588789 | -1.271192 | -1.201062 |
| O  | -4.926458 | -1.270234 | -0.891074 |
| H  | -4.862338 | -2.964233 | -3.188883 |
| O  | -3.071873 | -2.542027 | -1.241830 |
| H  | -6.842788 | -2.711118 | -1.992203 |
| C  | -5.284777 | -2.598252 | -0.475430 |
| C  | -4.534240 | -3.842069 | -2.613385 |
| C  | -6.707289 | -2.897587 | -0.919428 |
| H  | -3.641010 | -4.257394 | -3.101373 |
| C  | -4.180170 | -3.466593 | -1.175423 |
| H  | -5.329418 | -4.600032 | -2.645393 |
| H  | -6.964502 | -3.946164 | -0.708234 |
| C  | -3.782996 | -4.707395 | -0.390820 |
| H  | -3.091509 | -5.327265 | -0.977140 |
| H  | -4.673576 | -5.314791 | -0.170800 |
| H  | -1.863338 | 2.618304  | -0.698001 |
| H  | -5.832093 | -1.847133 | 1.468254  |
| C  | -5.186988 | -2.633407 | 1.050738  |
| H  | -5.517806 | -3.599445 | 1.456847  |
| H  | -3.294578 | -4.445023 | 0.556234  |
| H  | -4.157887 | -2.448234 | 1.392916  |
| H  | -7.410167 | -2.256071 | -0.368901 |
| H  | -0.953053 | 0.924508  | -2.125578 |
| H  | -1.012547 | -0.902193 | -2.128910 |
| C  | 3.401593  | 1.319011  | -1.869720 |
| H  | 4.200497  | 1.843621  | -1.331384 |
| C  | 3.666093  | -0.184832 | -1.921110 |
| H  | 3.702199  | -0.583463 | -2.945774 |
| C  | 1.642591  | 0.201653  | -0.798620 |
| C  | 2.379085  | -2.131896 | -0.995801 |
| C  | 3.513094  | -2.876666 | -0.659144 |
| C  | 1.145812  | -2.769510 | -1.128791 |
| C  | 3.419341  | -4.254147 | -0.441198 |
| C  | 1.031961  | -4.146262 | -0.927586 |
| C  | 2.173755  | -4.874706 | -0.579901 |
| H  | 2.089920  | -5.952738 | -0.413442 |
| Cu | -0.166922 | -0.006003 | 0.019584  |
| N  | 2.132332  | 1.393364  | -1.139087 |
| N  | 2.502518  | -0.740597 | -1.218239 |
| C  | -1.491520 | -0.079441 | 1.629007  |
| C  | -0.140482 | -0.279924 | 2.118858  |
| H  | 3.633099  | 2.158512  | 0.910520  |
| H  | 4.603204  | -0.441460 | -1.410969 |
| H  | 3.301639  | 1.773734  | -2.866561 |
| H  | -2.029566 | -1.013321 | 1.444928  |
| C  | 0.335983  | -1.664220 | 2.283741  |

|    |           |           |           |
|----|-----------|-----------|-----------|
| C  | 0.689410  | 0.775633  | 2.717740  |
| O  | -0.622129 | -2.579395 | 2.084390  |
| O  | 1.471928  | -2.013197 | 2.566794  |
| O  | 1.775323  | 0.621886  | 3.254601  |
| O  | 0.138984  | 1.991090  | 2.640980  |
| C  | 0.853504  | 3.073060  | 3.231470  |
| H  | 1.021524  | 2.885321  | 4.300954  |
| H  | 0.210836  | 3.952145  | 3.105124  |
| H  | 1.812657  | 3.215327  | 2.715231  |
| C  | -0.262861 | -3.938486 | 2.271680  |
| H  | -1.131288 | -4.527280 | 1.957011  |
| H  | -0.041433 | -4.135801 | 3.330482  |
| H  | 0.614256  | -4.201225 | 1.665892  |
| C  | 1.538327  | 2.657786  | -0.739433 |
| H  | 0.822000  | 2.414864  | 0.063665  |
| C  | 0.773646  | 3.342355  | -1.864854 |
| C  | 0.137652  | 4.568186  | -1.625671 |
| C  | 0.633379  | 2.760520  | -3.127998 |
| C  | -0.602057 | 5.198495  | -2.622974 |
| H  | 0.199231  | 5.032659  | -0.638683 |
| C  | -0.107419 | 3.388883  | -4.129876 |
| H  | 1.088828  | 1.790623  | -3.334010 |
| C  | -0.725137 | 4.612536  | -3.883225 |
| H  | -1.093653 | 6.150477  | -2.411246 |
| H  | -0.205708 | 2.911170  | -5.107030 |
| H  | -1.306880 | 5.104637  | -4.665471 |
| C  | 2.611682  | 3.567715  | -0.110847 |
| H  | 2.130357  | 4.519336  | 0.159223  |
| H  | 3.362911  | 3.818808  | -0.887469 |
| O  | 3.183812  | 3.045197  | 1.037889  |
| C  | -2.289290 | 1.083800  | 1.608817  |
| H  | -1.840705 | 2.033028  | 1.888422  |
| C  | -3.604777 | 1.044810  | 1.169708  |
| H  | -4.070792 | 0.065879  | 1.049570  |
| C  | -4.575541 | 2.138487  | 1.373462  |
| C  | -5.939726 | 1.879335  | 1.158727  |
| C  | -4.203567 | 3.434915  | 1.763426  |
| C  | -6.898176 | 2.874369  | 1.329791  |
| H  | -6.241081 | 0.877939  | 0.838208  |
| C  | -5.161799 | 4.431817  | 1.933949  |
| H  | -3.152061 | 3.672632  | 1.934835  |
| C  | -6.513236 | 4.158382  | 1.718901  |
| H  | -7.952733 | 2.648017  | 1.156355  |
| H  | -4.849173 | 5.433580  | 2.238074  |
| H  | -7.262445 | 4.941686  | 1.853244  |
| O  | 4.428448  | 0.740465  | 0.984516  |
| Na | 3.336543  | -0.711447 | 2.243141  |
| C  | 5.673729  | 0.736446  | 0.616013  |
| C  | 6.446526  | -0.458746 | 0.595052  |
| C  | 6.336563  | 1.919850  | 0.183933  |
| C  | 7.767327  | -0.468471 | 0.154510  |
| H  | 5.978772  | -1.385189 | 0.944269  |
| C  | 7.656766  | 1.895108  | -0.255491 |
| H  | 5.779742  | 2.860521  | 0.223933  |
| C  | 8.389043  | 0.704180  | -0.282934 |
| H  | 8.321897  | -1.411689 | 0.152877  |
| H  | 8.126916  | 2.827983  | -0.580939 |
| H  | 9.424138  | 0.691875  | -0.630732 |
| C  | -0.298521 | -4.820647 | -1.119403 |
| H  | -1.117913 | -4.092525 | -1.056762 |
| H  | -0.351737 | -5.300867 | -2.109980 |
| H  | -0.463948 | -5.606423 | -0.367840 |
| C  | 4.644146  | -5.056533 | -0.086221 |
| H  | 5.060380  | -5.546133 | -0.981098 |
| H  | 5.432909  | -4.420452 | 0.339248  |
| H  | 4.406927  | -5.847036 | 0.639925  |
| H  | 0.264279  | -2.193691 | -1.406417 |
| H  | 4.478318  | -2.379866 | -0.546847 |

89

Figure\_S15-6\_9b(NaO<sub>4</sub>)-Cu-allyl\_01 / electronic energy: -3597.06856996 a.u. / lowest freq: 15.34 cm<sup>-1</sup>

|    |           |           |           |
|----|-----------|-----------|-----------|
| Na | 0.148120  | -2.350929 | -0.661887 |
| H  | 2.438637  | -3.886514 | 0.418400  |
| H  | 4.437536  | -1.625816 | -2.657585 |
| O  | 2.188175  | -1.934213 | -1.331976 |
| C  | 4.457113  | -2.409826 | -1.896029 |
| C  | 3.271723  | -2.638718 | -1.144621 |
| H  | 6.503884  | -2.941304 | -2.274753 |
| C  | 5.611926  | -3.155530 | -1.678013 |
| C  | 3.330703  | -3.680261 | -0.180384 |
| C  | 5.648755  | -4.168717 | -0.715703 |
| C  | 4.491286  | -4.420599 | 0.026190  |
| H  | 6.559206  | -4.747918 | -0.547636 |
| H  | 4.492260  | -5.208637 | 0.785191  |
| H  | 2.110038  | -1.789209 | 2.251941  |
| H  | -1.683682 | -0.084569 | 3.012140  |
| C  | 0.177417  | -2.763996 | 2.184032  |
| C  | -0.716422 | -0.448477 | 2.624984  |
| H  | 0.009685  | -3.753268 | 1.738460  |
| C  | -0.814296 | -1.836152 | 2.123482  |

|    |           |           |           |
|----|-----------|-----------|-----------|
| H  | 0.060429  | -0.307140 | 3.395789  |
| B  | -2.112989 | -2.153360 | 1.318568  |
| O  | -3.369101 | -1.737541 | 1.633548  |
| H  | -2.845676 | -0.482203 | -0.927861 |
| O  | -2.073350 | -2.793843 | 0.089938  |
| H  | -2.386052 | -1.604043 | -2.238318 |
| C  | -3.158779 | -1.375665 | -1.489089 |
| H  | -4.906254 | -0.251131 | 0.103283  |
| C  | -3.345234 | -2.575300 | -0.562814 |
| C  | -4.288875 | -2.263960 | 0.657935  |
| C  | -5.353692 | -1.214414 | 0.379956  |
| H  | -4.085231 | -1.134855 | -2.028538 |
| H  | -5.962317 | -1.060989 | 1.282259  |
| H  | -4.158934 | -4.286914 | 1.470992  |
| H  | -5.400718 | -3.251670 | 2.212692  |
| C  | -4.917121 | -3.518031 | 1.262489  |
| H  | -3.003759 | -3.952870 | -2.186413 |
| C  | -3.717784 | -3.812772 | -1.361912 |
| H  | -3.704627 | -4.717295 | -0.741233 |
| H  | -6.020495 | -1.543104 | -0.431111 |
| H  | -5.677701 | -3.946520 | 0.595013  |
| H  | -4.721339 | -3.698819 | -1.797645 |
| H  | 2.106807  | -3.437236 | 2.912827  |
| C  | 1.510733  | -2.517409 | 2.830805  |
| H  | 1.401035  | -2.091228 | 3.843076  |
| C  | 1.280515  | 3.069545  | -2.003442 |
| H  | 1.565108  | 2.605156  | -2.959047 |
| C  | -0.172818 | 3.561404  | -1.995315 |
| H  | -0.276419 | 4.578520  | -1.584882 |
| C  | 0.060095  | 1.792810  | -0.476656 |
| C  | -2.217588 | 2.610963  | -0.829080 |
| C  | -2.678385 | 3.129778  | 0.395038  |
| C  | -3.100884 | 2.109301  | -1.801083 |
| C  | -4.054535 | 3.111730  | 0.641038  |
| C  | -4.470186 | 2.122037  | -1.519756 |
| C  | -4.944329 | 2.613849  | -0.307033 |
| H  | -6.016384 | 2.608530  | -0.098720 |
| Cu | -0.341132 | 0.639697  | 1.032050  |
| N  | 1.273784  | 2.050851  | -0.951347 |
| N  | -0.819266 | 2.595349  | -1.099937 |
| H  | 2.443780  | -0.610758 | -2.213460 |
| H  | -0.629024 | 3.549352  | -2.994037 |
| H  | 1.996706  | 3.870578  | -1.771134 |
| C  | 2.484707  | 1.372525  | -0.497575 |
| H  | 2.139125  | 0.425669  | -0.056505 |
| C  | 3.187276  | 2.170139  | 0.586692  |
| C  | 4.053990  | 3.229208  | 0.291404  |
| C  | 2.928357  | 1.870261  | 1.929919  |
| C  | 4.643739  | 3.972204  | 1.314760  |
| H  | 4.282158  | 3.482129  | -0.746497 |
| C  | 3.515716  | 2.610503  | 2.954124  |
| H  | 2.250016  | 1.047192  | 2.174293  |
| C  | 4.375475  | 3.666125  | 2.648300  |
| H  | 5.320155  | 4.793092  | 1.066340  |
| H  | 3.303057  | 2.360630  | 3.995928  |
| H  | 4.838980  | 4.246461  | 3.449152  |
| C  | 3.374358  | 0.994741  | -1.687423 |
| H  | 4.246875  | 0.448944  | -1.277619 |
| H  | 3.774104  | 1.901226  | -2.172724 |
| O  | 2.681605  | 0.261974  | -2.643836 |
| H  | -4.432045 | 3.504641  | 1.588162  |
| H  | -5.170862 | 1.726395  | -2.259259 |
| C  | -2.592705 | 1.563034  | -3.108381 |
| H  | -2.423060 | 2.369586  | -3.840006 |
| H  | -1.639450 | 1.031325  | -2.978681 |
| H  | -3.320420 | 0.870396  | -3.551477 |
| C  | -1.723572 | 3.682246  | 1.419703  |
| H  | -1.210134 | 2.868739  | 1.959856  |
| H  | -0.940363 | 4.298843  | 0.955650  |
| H  | -2.256508 | 4.292551  | 2.160509  |

121

Figure\_S15-6\_AA-9b(NaOPh)-ts(1,6major)\_01 / electronic energy: -4439.04225300 a.u. / lowest freq: -302.37 cm-1

|   |           |           |          |
|---|-----------|-----------|----------|
| C | 0.994657  | 0.629022  | 4.152905 |
| H | 0.816261  | -0.280969 | 3.564092 |
| H | 1.904888  | 0.462704  | 4.751414 |
| H | 0.157717  | 0.752953  | 4.852850 |
| H | -2.218728 | 2.280131  | 3.090642 |
| H | -0.785160 | 0.492325  | 2.170977 |
| C | -3.262119 | 1.334340  | 1.456737 |
| C | -1.329610 | -0.183510 | 1.503823 |
| H | -4.351476 | 1.420712  | 1.443181 |
| C | -2.712988 | 0.068601  | 1.315025 |
| H | -1.039590 | -1.237116 | 1.603453 |
| B | -3.618360 | -1.095557 | 0.817808 |
| O | -3.314717 | -2.417207 | 0.995351 |
| H | -5.983990 | -2.257156 | 2.112316 |
| O | -4.794050 | -0.917791 | 0.132915 |
| H | -7.170777 | -1.476924 | 1.039672 |
| C | -6.461358 | -2.312633 | 1.123140 |



|    |           |           |           |
|----|-----------|-----------|-----------|
| H  | -4.926709 | -4.301788 | 1.919199  |
| C  | -5.428985 | -2.204076 | 0.002360  |
| C  | -4.215837 | -3.191005 | 0.184963  |
| C  | -4.548176 | -4.487256 | 0.906230  |
| H  | -7.026107 | -3.253291 | 1.059066  |
| H  | -3.640887 | -5.102642 | 0.987943  |
| H  | -3.234633 | -2.560337 | -1.657250 |
| H  | -2.540355 | -3.998836 | -0.877860 |
| C  | -3.482985 | -3.487878 | -1.120908 |
| H  | -6.941358 | -1.564349 | -1.395553 |
| C  | -6.111421 | -2.284360 | -1.354170 |
| H  | -5.415593 | -2.048775 | -2.169261 |
| H  | -5.303295 | -5.058697 | 0.346199  |
| H  | -4.075709 | -4.133714 | -1.784018 |
| H  | -6.523173 | -3.290888 | -1.520711 |
| H  | -3.047810 | 3.418039  | 2.000905  |
| C  | -2.484748 | 2.475578  | 2.036996  |
| H  | -1.530048 | 2.621600  | 1.501572  |
| C  | 3.525684  | -1.464785 | 1.445159  |
| H  | 4.439255  | -1.676503 | 0.879275  |
| C  | 3.563752  | -0.059402 | 2.049284  |
| H  | 3.613945  | -0.062732 | 3.146650  |
| C  | 1.665140  | -0.263362 | 0.689854  |
| C  | 1.807661  | 1.771641  | 2.036639  |
| C  | 1.146095  | 1.841934  | 3.273955  |
| C  | 2.021140  | 2.908436  | 1.241402  |
| C  | 0.645184  | 3.082615  | 3.680133  |
| C  | 1.492873  | 4.127062  | 1.676007  |
| C  | 0.803203  | 4.212254  | 2.883192  |
| H  | 0.392937  | 5.170019  | 3.210406  |
| Cu | -0.099482 | 0.161163  | -0.143852 |
| N  | 2.358950  | -1.398161 | 0.556361  |
| N  | 2.294812  | 0.510423  | 1.582081  |
| C  | -1.421790 | 0.716156  | -1.636072 |
| C  | -0.126193 | 0.505968  | -2.260099 |
| H  | 4.317977  | -1.911589 | -1.328775 |
| H  | 4.410994  | 0.529868  | 1.663904  |
| H  | 3.391423  | -2.253427 | 2.202690  |
| H  | -2.099185 | -0.138345 | -1.715683 |
| C  | 0.782572  | 1.583898  | -2.679487 |
| C  | 0.163637  | -0.813798 | -2.832815 |
| O  | 0.261455  | 2.807221  | -2.553427 |
| O  | 1.913349  | 1.442254  | -3.120644 |
| O  | 1.175626  | -1.140518 | -3.433698 |
| O  | -0.814574 | -1.716183 | -2.640531 |
| C  | -0.612902 | -2.988096 | -3.236977 |
| H  | -0.576527 | -2.902059 | -4.331834 |
| H  | -1.463020 | -3.607051 | -2.935388 |
| H  | 0.327652  | -3.439978 | -2.893055 |
| C  | 1.038131  | 3.899272  | -3.021440 |
| H  | 2.026087  | 3.916713  | -2.544798 |
| H  | 0.475833  | 4.802864  | -2.762013 |
| H  | 1.170927  | 3.838726  | -4.110699 |
| C  | 1.868628  | -2.559587 | -0.166404 |
| H  | 1.278385  | -2.168860 | -1.008231 |
| C  | 0.950653  | -3.442312 | 0.674230  |
| C  | 0.299804  | -4.527999 | 0.072922  |
| C  | 0.702516  | -3.192569 | 2.027029  |
| C  | -0.563666 | -5.341404 | 0.802888  |
| H  | 0.456067  | -4.739028 | -0.987382 |
| C  | -0.163054 | -4.003211 | 2.761591  |
| H  | 1.170684  | -2.341249 | 2.522359  |
| C  | -0.797802 | -5.083012 | 2.153454  |
| H  | -1.061797 | -6.179498 | 0.310090  |
| H  | -0.344391 | -3.781576 | 3.815261  |
| H  | -1.477473 | -5.716615 | 2.726922  |
| C  | 3.033926  | -3.354156 | -0.784286 |
| H  | 2.607026  | -4.236832 | -1.282740 |
| H  | 3.676342  | -3.743843 | 0.029176  |
| O  | 3.757611  | -2.637747 | -1.728897 |
| C  | -2.033507 | 1.924162  | -1.230037 |
| H  | -1.437210 | 2.833493  | -1.208038 |
| C  | -3.353814 | 1.956174  | -0.820294 |
| H  | -3.963969 | 1.067412  | -0.993847 |
| C  | -4.121858 | 3.197283  | -0.612268 |
| C  | -5.519929 | 3.118415  | -0.496253 |
| C  | -3.523054 | 4.464126  | -0.513055 |
| C  | -6.292343 | 4.258448  | -0.289256 |
| H  | -6.000857 | 2.138745  | -0.564629 |
| C  | -4.294551 | 5.605130  | -0.305701 |
| H  | -2.438676 | 4.564035  | -0.590710 |
| C  | -5.682500 | 5.509794  | -0.191774 |
| H  | -7.377515 | 4.168661  | -0.200933 |
| H  | -3.806282 | 6.579452  | -0.229348 |
| H  | -6.284090 | 6.406448  | -0.027802 |
| H  | 1.638670  | 5.021331  | 1.065270  |
| H  | 0.114459  | 3.157263  | 4.632228  |
| C  | 2.834696  | 2.805511  | -0.016249 |
| O  | 4.891885  | -0.411924 | -1.258193 |

|    |          |           |           |
|----|----------|-----------|-----------|
| Na | 3.260473 | -0.381258 | -2.788678 |
| C  | 5.909448 | 0.069296  | -0.614765 |
| C  | 6.224501 | 1.456656  | -0.640249 |
| C  | 6.765668 | -0.752305 | 0.170791  |
| C  | 7.285932 | 1.978492  | 0.092906  |
| H  | 5.607582 | 2.110668  | -1.262807 |
| C  | 7.823504 | -0.217304 | 0.901258  |
| H  | 6.582471 | -1.831360 | 0.179632  |
| C  | 8.094641 | 1.153607  | 0.881006  |
| H  | 7.487648 | 3.052991  | 0.046521  |
| H  | 8.452672 | -0.885961 | 1.496591  |
| H  | 8.925115 | 1.568487  | 1.456025  |
| H  | 2.967128 | 3.790755  | -0.481698 |
| H  | 2.375484 | 2.130399  | -0.750216 |
| H  | 3.832566 | 2.393282  | 0.194920  |

121

Figure\_S15-6\_AA-9b(NaOPh)-ts(1,6major)\_02 / electronic energy: -4439.04481123 a.u. / lowest freq: -334.42 cm<sup>-1</sup>

|    |           |           |           |
|----|-----------|-----------|-----------|
| H  | -5.255192 | -3.977951 | 0.768063  |
| H  | -3.999758 | -5.150226 | -0.794285 |
| H  | -6.818441 | -3.145155 | 0.588918  |
| B  | -3.638043 | -1.652602 | 0.129695  |
| C  | -6.000203 | -3.630112 | 0.037719  |
| O  | -3.082789 | -2.691759 | -0.568205 |
| H  | -6.408858 | -4.503835 | -0.489091 |
| O  | -4.968682 | -1.484570 | -0.162774 |
| C  | -3.927765 | -4.617017 | -1.750629 |
| H  | -2.959366 | -4.863722 | -2.209158 |
| C  | -5.393976 | -2.621870 | -0.937529 |
| C  | -4.037255 | -3.112794 | -1.560908 |
| H  | -4.722528 | -4.980129 | -2.419027 |
| H  | -7.350504 | -1.857562 | -1.424662 |
| C  | -6.437172 | -2.173820 | -1.948674 |
| C  | -3.692271 | -2.388657 | -2.862088 |
| H  | -3.808403 | -1.299962 | -2.757512 |
| H  | -6.700518 | -3.001599 | -2.623871 |
| H  | -6.081020 | -1.329075 | -2.551600 |
| H  | -4.331083 | -2.726256 | -3.690226 |
| H  | -2.644344 | -2.591009 | -3.118781 |
| C  | -2.857101 | -0.723643 | 1.107819  |
| C  | -3.514386 | 0.413439  | 1.567544  |
| H  | -4.601350 | 0.445684  | 1.460180  |
| C  | -2.885910 | 1.357665  | 2.543997  |
| H  | -2.610075 | 0.842020  | 3.480405  |
| H  | -1.954744 | 1.777575  | 2.125494  |
| H  | -3.552818 | 2.192328  | 2.796661  |
| C  | -1.486081 | -0.957274 | 1.360627  |
| H  | -1.064339 | -0.574524 | 2.296595  |
| H  | -1.093171 | -1.943479 | 1.084004  |
| C  | 3.606184  | -0.767606 | 1.844605  |
| H  | 4.465205  | -1.125756 | 1.264334  |
| C  | 3.591230  | 0.764463  | 1.937533  |
| H  | 3.694321  | 1.135949  | 2.967500  |
| C  | 1.608628  | 0.028556  | 0.930731  |
| C  | 1.714981  | 2.406393  | 1.365457  |
| C  | 2.116658  | 3.305827  | 0.366585  |
| C  | 0.763224  | 2.749717  | 2.342676  |
| C  | 1.479016  | 4.551116  | 0.314876  |
| C  | 0.139338  | 3.995696  | 2.246091  |
| C  | 0.485172  | 4.885016  | 1.229697  |
| H  | -0.011696 | 5.855499  | 1.163356  |
| Cu | -0.170749 | 0.075674  | 0.067888  |
| N  | 2.345131  | -1.057698 | 1.153282  |
| N  | 2.268175  | 1.093910  | 1.398127  |
| C  | -1.478595 | 0.567812  | -1.425299 |
| C  | -0.179655 | 0.518561  | -2.073294 |
| H  | 3.749777  | -1.804693 | -1.003357 |
| H  | 4.383681  | 1.216262  | 1.321385  |
| H  | 3.628469  | -1.256801 | 2.830913  |
| H  | -2.113580 | -0.304554 | -1.595014 |
| C  | 0.528557  | 1.697233  | -2.579361 |
| C  | 0.305234  | -0.787237 | -2.528551 |
| O  | -0.175792 | 2.829641  | -2.484829 |
| O  | 1.642721  | 1.705049  | -3.083533 |
| O  | 1.231080  | -1.015272 | -3.292403 |
| O  | -0.386118 | -1.800022 | -1.978196 |
| C  | 0.025406  | -3.121779 | -2.288783 |
| H  | -0.153026 | -3.346728 | -3.350638 |
| H  | -0.590212 | -3.772115 | -1.657326 |
| H  | 1.095049  | -3.251839 | -2.068197 |
| C  | 0.390729  | 4.001107  | -3.043438 |
| H  | 1.371067  | 4.219310  | -2.601172 |
| H  | -0.309757 | 4.812562  | -2.818047 |
| H  | 0.508581  | 3.896002  | -4.131448 |
| C  | 1.890950  | -2.400175 | 0.843716  |
| H  | 1.120419  | -2.276112 | 0.067916  |
| C  | 1.221456  | -3.090467 | 2.024917  |
| C  | 0.650400  | -4.357340 | 1.842752  |
| C  | 1.066592  | -2.467199 | 3.266426  |
| C  | -0.041994 | -4.987189 | 2.873999  |

|    |           |           |           |
|----|-----------|-----------|-----------|
| H  | 0.722892  | -4.852899 | 0.871423  |
| C  | 0.377280  | -3.096907 | 4.303237  |
| H  | 1.461410  | -1.462999 | 3.428422  |
| C  | -0.178110 | -4.360077 | 4.112963  |
| H  | -0.486845 | -5.970369 | 2.705507  |
| H  | 0.266599  | -2.588667 | 5.263624  |
| H  | -0.722319 | -4.850848 | 4.922665  |
| C  | 3.017222  | -3.219645 | 0.195863  |
| H  | 2.659833  | -4.252029 | 0.066429  |
| H  | 3.872688  | -3.279077 | 0.900039  |
| O  | 3.383175  | -2.735360 | -1.052170 |
| C  | -2.081299 | 1.680598  | -0.802655 |
| H  | -1.465271 | 2.558752  | -0.605467 |
| C  | -3.412304 | 1.678253  | -0.404193 |
| H  | -4.076236 | 0.928197  | -0.838492 |
| C  | -4.094032 | 2.876612  | 0.116397  |
| C  | -5.497477 | 2.901070  | 0.170166  |
| C  | -3.396447 | 3.998919  | 0.594332  |
| C  | -6.180484 | 4.003039  | 0.678952  |
| H  | -6.056921 | 2.032853  | -0.189525 |
| C  | -4.078403 | 5.101267  | 1.102557  |
| H  | -2.304729 | 4.009072  | 0.587544  |
| C  | -5.473590 | 5.110830  | 1.148855  |
| H  | -7.272540 | 3.996509  | 0.710416  |
| H  | -3.513520 | 5.961003  | 1.471018  |
| H  | -6.005724 | 5.975813  | 1.550600  |
| O  | 4.388212  | -0.320187 | -1.209869 |
| Na | 3.231165  | 0.062271  | -3.053194 |
| C  | 5.638165  | -0.196215 | -0.869884 |
| C  | 6.397413  | -1.299655 | -0.387018 |
| C  | 6.319350  | 1.049532  | -0.945103 |
| C  | 7.723015  | -1.154471 | 0.012149  |
| H  | 5.910832  | -2.278636 | -0.352700 |
| C  | 7.646450  | 1.179696  | -0.544837 |
| H  | 5.773891  | 1.913918  | -1.331723 |
| C  | 8.365233  | 0.085078  | -0.055345 |
| H  | 8.267219  | -2.029862 | 0.379348  |
| H  | 8.131525  | 2.157797  | -0.618588 |
| H  | 9.405409  | 0.194877  | 0.258677  |
| C  | 3.238733  | 2.965842  | -0.573678 |
| H  | 3.119625  | 3.469681  | -1.541363 |
| H  | 4.195872  | 3.302579  | -0.142409 |
| H  | 3.326456  | 1.884578  | -0.752276 |
| C  | 0.459871  | 1.806157  | 3.475341  |
| H  | 0.046666  | 0.857347  | 3.107715  |
| H  | 1.374652  | 1.563467  | 4.037990  |
| H  | -0.265865 | 2.245529  | 4.171782  |
| H  | -0.619027 | 4.273852  | 2.981834  |
| H  | 1.771301  | 5.269237  | -0.454780 |

121

Figure\_S15-6\_AA-9b(NaOPh)-ts(1,6minor)\_01 / electronic energy: -4439.04644858 a.u. / lowest freq: -305.39 cm-1

|   |           |           |           |
|---|-----------|-----------|-----------|
| C | -0.816448 | -1.703765 | 3.816329  |
| H | -0.728413 | -0.673569 | 3.448528  |
| H | -1.666631 | -1.735577 | 4.517117  |
| H | 0.091652  | -1.941629 | 4.386280  |
| H | 2.074218  | 2.369535  | 1.540851  |
| H | 0.950529  | -1.411559 | 1.694922  |
| C | 3.524345  | 0.779378  | 1.365728  |
| C | 1.381267  | -0.413942 | 1.547875  |
| H | 4.608238  | 0.688334  | 1.255940  |
| C | 2.769530  | -0.379659 | 1.265206  |
| H | 0.968521  | 0.353206  | 2.214848  |
| B | 3.424432  | -1.675624 | 0.704774  |
| O | 2.857177  | -2.918157 | 0.817555  |
| H | 3.200795  | -2.699393 | -1.995908 |
| O | 4.622117  | -1.708923 | 0.036700  |
| H | 4.830442  | -2.198008 | -2.504259 |
| C | 4.266496  | -2.968298 | -1.958796 |
| H | 2.506423  | -4.721656 | -1.074730 |
| C | 4.773777  | -3.029879 | -0.518678 |
| C | 3.845678  | -3.884588 | 0.418373  |
| C | 3.155100  | -5.056594 | -0.258178 |
| H | 4.405402  | -3.928372 | -2.476126 |
| H | 2.529591  | -5.589692 | 0.471891  |
| H | 5.076151  | -3.522360 | 2.185854  |
| H | 3.805632  | -4.752332 | 2.387812  |
| C | 4.554868  | -4.353765 | 1.688973  |
| H | 6.811134  | -2.780521 | -1.180317 |
| C | 6.242541  | -3.420207 | -0.490186 |
| H | 6.673107  | -3.304490 | 0.512493  |
| H | 3.895432  | -5.764387 | -0.659584 |
| H | 5.285605  | -5.145917 | 1.473306  |
| H | 6.369746  | -4.465260 | -0.809826 |
| H | 3.724035  | 2.832893  | 2.022770  |
| C | 2.995015  | 2.012256  | 2.032719  |
| C | 2.726907  | 1.811601  | 3.084803  |
| C | -3.479536 | 0.945164  | 1.791081  |
| H | -4.379440 | 1.279805  | 1.260737  |
| C | -3.505537 | -0.567237 | 2.040728  |

|    |           |           |           |
|----|-----------|-----------|-----------|
| H  | -3.527530 | -0.825400 | 3.109342  |
| C  | -1.603055 | -0.027984 | 0.788840  |
| C  | -1.765246 | -2.345269 | 1.548648  |
| C  | -1.018260 | -2.686169 | 2.693241  |
| C  | -2.045253 | -3.281805 | 0.542198  |
| C  | -0.481337 | -3.972446 | 2.772567  |
| C  | -1.493040 | -4.563534 | 0.664399  |
| C  | -0.705282 | -4.901618 | 1.758944  |
| H  | -0.271876 | -5.901512 | 1.832403  |
| Cu | 0.173531  | -0.071472 | -0.102109 |
| N  | -2.281709 | 1.106271  | 0.959659  |
| N  | -2.249146 | -1.009691 | 1.426484  |
| C  | 1.510555  | 0.262642  | -1.637265 |
| C  | 0.199135  | 0.078909  | -2.238643 |
| H  | -3.918781 | 1.755908  | -1.047723 |
| H  | -4.361291 | -1.052381 | 1.545017  |
| H  | -3.390830 | 1.529430  | 2.720223  |
| H  | 2.148130  | -0.624004 | -1.674116 |
| C  | -0.200935 | -1.282629 | -2.620828 |
| C  | -0.622124 | 1.165440  | -2.791431 |
| O  | 0.750782  | -2.201225 | -2.393177 |
| O  | -1.281106 | -1.617871 | -3.084909 |
| O  | -1.647963 | 1.034203  | -3.440127 |
| O  | -0.147827 | 2.390296  | -2.535136 |
| C  | -0.911502 | 3.485330  | -3.031403 |
| H  | -0.918545 | 3.485577  | -4.130249 |
| H  | -0.410460 | 4.388504  | -2.664936 |
| H  | -1.943447 | 3.424536  | -2.657846 |
| C  | 0.431483  | -3.558414 | -2.655994 |
| H  | -0.114583 | -3.990292 | -1.804582 |
| H  | 1.387029  | -4.078921 | -2.782999 |
| H  | -0.170023 | -3.653369 | -3.568132 |
| C  | -1.817523 | 2.381965  | 0.445817  |
| H  | -1.216891 | 2.149096  | -0.444559 |
| C  | -0.904519 | 3.135009  | 1.402194  |
| C  | -0.179411 | 4.228848  | 0.909791  |
| C  | -0.730005 | 2.770350  | 2.739244  |
| C  | 0.673847  | 4.955221  | 1.735747  |
| H  | -0.276523 | 4.509527  | -0.142393 |
| C  | 0.122470  | 3.498324  | 3.571276  |
| H  | -1.249582 | 1.899692  | 3.142546  |
| C  | 0.821624  | 4.596156  | 3.076014  |
| H  | 1.233051  | 5.800485  | 1.328765  |
| H  | 0.245424  | 3.196231  | 4.613569  |
| H  | 1.491845  | 5.162006  | 3.726171  |
| C  | -2.996249 | 3.230709  | -0.053494 |
| H  | -2.604122 | 4.224328  | -0.319732 |
| H  | -3.705897 | 3.397413  | 0.782453  |
| O  | -3.610683 | 2.699079  | -1.179774 |
| C  | 2.177976  | 1.457440  | -1.284976 |
| H  | 1.617997  | 2.389837  | -1.275160 |
| C  | 3.509629  | 1.450840  | -0.906315 |
| H  | 4.092111  | 0.547897  | -1.101925 |
| C  | 4.301308  | 2.677439  | -0.707037 |
| C  | 5.702030  | 2.588135  | -0.650833 |
| C  | 3.715013  | 3.943891  | -0.543025 |
| C  | 6.488907  | 3.717610  | -0.438540 |
| H  | 6.176128  | 1.609801  | -0.769603 |
| C  | 4.500363  | 5.073709  | -0.330733 |
| H  | 2.628625  | 4.049561  | -0.558719 |
| C  | 5.891366  | 4.968166  | -0.276233 |
| H  | 7.576247  | 3.619935  | -0.396899 |
| H  | 4.020547  | 6.046625  | -0.200064 |
| H  | 6.504986  | 5.855581  | -0.106527 |
| H  | -1.696383 | -5.305960 | -0.112022 |
| C  | 0.123932  | -4.246189 | 3.640069  |
| C  | -2.927916 | -2.949561 | -0.629403 |
| O  | -4.497508 | 0.218862  | -1.094721 |
| Na | -3.261915 | -0.435559 | -2.798175 |
| C  | -5.707532 | 0.088882  | -0.631162 |
| C  | -6.312957 | -1.184783 | -0.449796 |
| C  | -6.489739 | 1.216901  | -0.253941 |
| C  | -7.594528 | -1.314066 | 0.079291  |
| H  | -5.744827 | -2.073802 | -0.735687 |
| C  | -7.768831 | 1.072374  | 0.275279  |
| H  | -6.057364 | 2.210276  | -0.403628 |
| C  | -8.338969 | -0.191462 | 0.452734  |
| H  | -8.021847 | -2.313708 | 0.203976  |
| H  | -8.334125 | 1.967478  | 0.552392  |
| H  | -9.342193 | -0.299671 | 0.870459  |
| H  | -3.729193 | -3.698486 | -0.721093 |
| H  | -2.356256 | -2.963210 | -1.568712 |
| H  | -3.391512 | -1.958153 | -0.532641 |

121

Figure\_S15-6\_AA-9b(NaO<sub>4</sub>Ph)-ts(1,6minor)\_02 / electronic energy: -4439.04584920 a.u. / lowest freq: -309.05 cm<sup>-1</sup>

|   |          |           |          |
|---|----------|-----------|----------|
| H | 5.185048 | -3.617520 | 2.072278 |
| H | 7.038092 | -2.943266 | 0.850253 |
| C | 4.861673 | -4.348375 | 1.316903 |
| H | 4.037193 | -4.937284 | 1.743399 |

|    |           |           |           |
|----|-----------|-----------|-----------|
| B  | 3.658940  | -1.591276 | 0.671235  |
| O  | 4.962677  | -1.405598 | 0.281013  |
| H  | 5.699381  | -5.027340 | 1.104456  |
| C  | 6.828660  | -2.851052 | -0.222824 |
| O  | 3.220451  | -2.864636 | 0.420226  |
| C  | 4.366450  | -3.654653 | 0.048067  |
| C  | 5.359813  | -2.558766 | -0.481913 |
| H  | 7.129324  | -3.784027 | -0.722248 |
| C  | 3.961192  | -4.689376 | -0.988370 |
| H  | 5.701014  | -1.304128 | -2.198493 |
| C  | 5.136537  | -2.215768 | -1.955050 |
| H  | 4.842397  | -5.252347 | -1.330284 |
| H  | 4.073349  | -2.024235 | -2.163986 |
| H  | 3.486417  | -4.225703 | -1.861668 |
| H  | 5.481128  | -3.022347 | -2.617233 |
| H  | 3.251745  | -5.403685 | -0.545637 |
| H  | 7.446307  | -2.034603 | -0.623567 |
| C  | 2.796254  | -0.452117 | 1.292984  |
| C  | 1.416304  | -0.652442 | 1.543467  |
| H  | 0.939466  | 0.000895  | 2.283245  |
| H  | 1.066871  | -1.693240 | 1.582260  |
| C  | 3.397860  | 0.790195  | 1.449710  |
| H  | 4.487233  | 0.836813  | 1.379293  |
| H  | 2.438284  | 1.715911  | 3.146224  |
| H  | 1.739880  | 2.159565  | 1.585024  |
| C  | 2.693771  | 1.941222  | 2.095730  |
| H  | 3.301138  | 2.855826  | 2.087168  |
| C  | -3.568747 | 0.986343  | 1.693768  |
| H  | -4.444550 | 1.276624  | 1.100761  |
| C  | -3.603223 | -0.503966 | 2.049146  |
| H  | -3.650228 | -0.688590 | 3.132294  |
| C  | -1.655534 | -0.050352 | 0.829810  |
| C  | -1.887009 | -2.327637 | 1.694244  |
| C  | -2.224391 | -3.310367 | 0.750651  |
| C  | -1.139265 | -2.630404 | 2.847263  |
| C  | -1.742757 | -4.609440 | 0.951408  |
| C  | -0.669420 | -3.936526 | 3.004294  |
| C  | -0.960331 | -4.917680 | 2.059277  |
| H  | -0.582652 | -5.933437 | 2.195625  |
| Cu | 0.134803  | -0.171173 | -0.024489 |
| N  | -2.336613 | 1.093930  | 0.904639  |
| N  | -2.333001 | -0.988539 | 1.498959  |
| C  | 1.466500  | 0.155478  | -1.561745 |
| C  | 0.174489  | -0.093228 | -2.183124 |
| H  | -3.917285 | 1.613277  | -1.199167 |
| H  | -4.449079 | -1.022209 | 1.569783  |
| H  | -3.522484 | 1.637037  | 2.580755  |
| H  | 2.135644  | -0.707887 | -1.560753 |
| C  | -0.202222 | -1.490694 | -2.429422 |
| C  | -0.640919 | 0.934548  | -2.839169 |
| O  | 0.703170  | -2.359786 | -1.955175 |
| O  | -1.228155 | -1.896398 | -2.959786 |
| O  | -1.648193 | 0.739502  | -3.501957 |
| O  | -0.183346 | 2.180212  | -2.667062 |
| C  | -0.940245 | 3.227684  | -3.264861 |
| H  | -0.929952 | 3.135217  | -4.359840 |
| H  | -0.445706 | 4.159400  | -2.967070 |
| H  | -1.977202 | 3.195391  | -2.902232 |
| C  | 0.408240  | -3.741988 | -2.059083 |
| H  | -0.501026 | -3.992224 | -1.496925 |
| H  | 1.261673  | -4.260706 | -1.613993 |
| H  | 0.281237  | -4.040413 | -3.108901 |
| C  | -1.856088 | 2.338206  | 0.333174  |
| H  | -1.212225 | 2.056433  | -0.512627 |
| C  | -0.998405 | 3.156844  | 1.286399  |
| C  | -0.275556 | 4.241421  | 0.771412  |
| C  | -0.868769 | 2.856415  | 2.644461  |
| C  | 0.537032  | 5.016876  | 1.593568  |
| H  | -0.340083 | 4.474119  | -0.295186 |
| C  | -0.057468 | 3.634108  | 3.472381  |
| H  | -1.387698 | 1.995201  | 3.068290  |
| C  | 0.644777  | 4.718326  | 2.952339  |
| H  | 1.095823  | 5.854025  | 1.169628  |
| H  | 0.032713  | 3.381133  | 4.530965  |
| H  | 1.284392  | 5.322501  | 3.598920  |
| C  | -3.016080 | 3.146082  | -0.268610 |
| H  | -2.614629 | 4.120565  | -0.586635 |
| H  | -3.755873 | 3.367673  | 0.527701  |
| O  | -3.588776 | 2.541500  | -1.378872 |
| C  | 2.069463  | 1.385500  | -1.215747 |
| H  | 1.466257  | 2.291555  | -1.227140 |
| C  | 3.395392  | 1.447258  | -0.816541 |
| H  | 4.027054  | 0.577701  | -1.006912 |
| C  | 4.134789  | 2.705884  | -0.617192 |
| C  | 5.537579  | 2.667947  | -0.550097 |
| C  | 3.500535  | 3.949876  | -0.467171 |
| C  | 6.280951  | 3.827258  | -0.344168 |
| H  | 6.046036  | 1.705256  | -0.653860 |
| C  | 4.242823  | 5.109910  | -0.261137 |

|    |           |           |           |
|----|-----------|-----------|-----------|
| H  | 2.411259  | 4.013038  | -0.490542 |
| C  | 5.636409  | 5.056363  | -0.198312 |
| H  | 7.370815  | 3.770207  | -0.294284 |
| H  | 3.727857  | 6.066251  | -0.142701 |
| H  | 6.215238  | 5.967878  | -0.034373 |
| Na | -3.244483 | -0.712273 | -2.787611 |
| O  | -4.530737 | 0.091250  | -1.180948 |
| C  | -5.756553 | 0.007811  | -0.748576 |
| C  | -6.519165 | 1.166955  | -0.430439 |
| C  | -6.401457 | -1.242953 | -0.545225 |
| C  | -7.815684 | 1.072883  | 0.067067  |
| H  | -6.058626 | 2.143911  | -0.602100 |
| C  | -7.699678 | -1.321860 | -0.048002 |
| H  | -5.852493 | -2.155894 | -0.789206 |
| C  | -8.423705 | -0.169177 | 0.269430  |
| H  | -8.364141 | 1.991077  | 0.298483  |
| H  | -8.156659 | -2.305807 | 0.094842  |
| H  | -9.440449 | -0.238030 | 0.662056  |
| H  | -0.068556 | -4.185663 | 3.882392  |
| H  | -1.992676 | -5.387150 | 0.224973  |
| C  | -3.080964 | -2.998057 | -0.445763 |
| H  | -3.545105 | -2.004577 | -0.382835 |
| H  | -2.482647 | -3.026574 | -1.369038 |
| H  | -3.877670 | -3.749543 | -0.549799 |
| C  | -0.874588 | -1.594879 | 3.907603  |
| H  | 0.089737  | -1.775781 | 4.401266  |
| H  | -0.862773 | -0.578416 | 3.495142  |
| H  | -1.657272 | -1.630355 | 4.682697  |

121

Figure\_S15-6\_AA-9b(NaOPh)-ts(1,6minor)\_03 / electronic energy: -4439.04644860 a.u. / lowest freq: -305.38 cm<sup>-1</sup>

|    |           |           |           |
|----|-----------|-----------|-----------|
| H  | 3.724036  | 2.832901  | 2.022761  |
| C  | 2.995017  | 2.012263  | 2.032709  |
| H  | 2.726907  | 1.811607  | 3.084792  |
| H  | 2.074221  | 2.369541  | 1.540839  |
| H  | 4.608241  | 0.688345  | 1.255924  |
| C  | 3.524348  | 0.779386  | 1.365718  |
| H  | 0.968531  | 0.353208  | 2.214853  |
| C  | 2.769537  | -0.379655 | 1.265203  |
| C  | 1.381275  | -0.413941 | 1.547879  |
| O  | 4.622124  | -1.708913 | 0.036692  |
| B  | 3.424442  | -1.675618 | 0.704773  |
| H  | 6.811141  | -2.780500 | -1.180333 |
| H  | 0.950540  | -1.411559 | 1.694928  |
| H  | 6.673127  | -3.304466 | 0.512480  |
| C  | 6.242555  | -3.420188 | -0.490197 |
| C  | 4.773789  | -3.029871 | -0.518681 |
| H  | 5.076183  | -3.522337 | 2.185851  |
| O  | 2.857197  | -2.918155 | 0.817563  |
| C  | 3.845701  | -3.884581 | 0.418380  |
| H  | 6.369765  | -4.465242 | -0.809834 |
| C  | 4.554902  | -4.353747 | 1.688978  |
| H  | 3.805673  | -4.752316 | 2.387823  |
| H  | 5.285643  | -5.145896 | 1.473309  |
| C  | 3.155128  | -5.056594 | -0.258162 |
| H  | 3.895462  | -5.764380 | -0.659576 |
| H  | 2.529632  | -5.589699 | 0.471914  |
| C  | 4.266498  | -2.968298 | -1.958795 |
| H  | 4.830437  | -2.198009 | -2.504266 |
| H  | 4.405406  | -3.928375 | -2.476122 |
| H  | 2.506438  | -4.721663 | -1.074707 |
| H  | 3.200796  | -2.699399 | -1.995902 |
| C  | -3.479538 | 0.945170  | 1.791087  |
| H  | -4.379441 | 1.279811  | 1.260742  |
| C  | -3.505538 | -0.567231 | 2.040735  |
| H  | -3.527537 | -0.825392 | 3.109350  |
| C  | -1.603053 | -0.027978 | 0.788851  |
| C  | -1.765242 | -2.345261 | 1.548663  |
| C  | -2.045249 | -3.281798 | 0.542215  |
| C  | -1.018254 | -2.686158 | 2.693256  |
| C  | -1.493033 | -4.563526 | 0.664417  |
| C  | -0.481327 | -3.972433 | 2.772583  |
| C  | -0.705272 | -4.901607 | 1.758960  |
| H  | -0.271864 | -5.901500 | 1.832420  |
| Cu | 0.173531  | -0.071473 | -0.102100 |
| N  | -2.281710 | 1.106276  | 0.959664  |
| N  | -2.249144 | -1.009684 | 1.426498  |
| C  | 1.510546  | 0.262633  | -1.637265 |
| C  | 0.199125  | 0.078894  | -2.238636 |
| H  | -3.918783 | 1.755910  | -1.047718 |
| H  | -4.361289 | -1.052376 | 1.545021  |
| H  | -3.390831 | 1.529437  | 2.720228  |
| H  | 2.148124  | -0.624010 | -1.674114 |
| C  | -0.200942 | -1.282647 | -2.620815 |
| C  | -0.622141 | 1.165421  | -2.791424 |
| O  | 0.750776  | -2.201240 | -2.393154 |
| O  | -1.281110 | -1.617894 | -3.084898 |
| O  | -1.647989 | 1.034178  | -3.440105 |
| O  | -0.147840 | 2.390278  | -2.535147 |
| C  | -0.911521 | 3.485308  | -3.031415 |

|    |           |           |           |
|----|-----------|-----------|-----------|
| H  | -0.918577 | 3.485546  | -4.130260 |
| H  | -0.410474 | 4.388485  | -2.664961 |
| H  | -1.943462 | 3.424517  | -2.657845 |
| C  | 0.431482  | -3.558430 | -2.655970 |
| H  | -0.114592 | -3.990307 | -1.804563 |
| H  | 1.387030  | -4.078937 | -2.782962 |
| H  | -0.170014 | -3.653390 | -3.568114 |
| C  | -1.817526 | 2.381968  | 0.445816  |
| H  | -1.216899 | 2.149098  | -0.444563 |
| C  | -0.904516 | 3.135015  | 1.402185  |
| C  | -0.179403 | 4.228845  | 0.909771  |
| C  | -0.730007 | 2.770371  | 2.739240  |
| C  | 0.673858  | 4.955224  | 1.735720  |
| H  | -0.276512 | 4.509513  | -0.142417 |
| C  | 0.122471  | 3.498350  | 3.571265  |
| H  | -1.249590 | 1.899720  | 3.142550  |
| C  | 0.821631  | 4.596173  | 3.075992  |
| H  | 1.233066  | 5.800481  | 1.328729  |
| H  | 0.245421  | 3.196270  | 4.613561  |
| H  | 1.491853  | 5.162028  | 3.726143  |
| C  | -2.996254 | 3.230713  | -0.053488 |
| H  | -2.604126 | 4.224332  | -0.319729 |
| H  | -3.705896 | 3.397419  | 0.782463  |
| O  | -3.610696 | 2.699086  | -1.179766 |
| C  | 2.177965  | 1.457435  | -1.284981 |
| H  | 1.617982  | 2.389831  | -1.275166 |
| C  | 3.509619  | 1.450841  | -0.906326 |
| H  | 4.092103  | 0.547899  | -1.101938 |
| C  | 4.301295  | 2.677443  | -0.707057 |
| C  | 5.702018  | 2.588145  | -0.650869 |
| C  | 3.714996  | 3.943892  | -0.543036 |
| C  | 6.488893  | 3.717623  | -0.438587 |
| H  | 6.176119  | 1.609813  | -0.769645 |
| C  | 4.500344  | 5.073714  | -0.330754 |
| H  | 2.628607  | 4.049557  | -0.558717 |
| C  | 5.891348  | 4.968177  | -0.276272 |
| H  | 7.576234  | 3.619953  | -0.396961 |
| H  | 4.020525  | 6.046628  | -0.200078 |
| H  | 6.504967  | 5.855594  | -0.106574 |
| O  | -4.497502 | 0.218863  | -1.094716 |
| Na | -3.261928 | -0.435601 | -2.798170 |
| C  | -5.707527 | 0.088878  | -0.631162 |
| C  | -6.312953 | -1.184790 | -0.449811 |
| C  | -6.489737 | 1.216892  | -0.253933 |
| C  | -7.594526 | -1.314079 | 0.079268  |
| H  | -5.744821 | -2.073806 | -0.735709 |
| C  | -7.768832 | 1.072359  | 0.275278  |
| H  | -6.057363 | 2.210269  | -0.403610 |
| C  | -8.338969 | -0.191479 | 0.452718  |
| H  | -8.021845 | -2.313722 | 0.203941  |
| H  | -8.334128 | 1.967460  | 0.552397  |
| H  | -9.342196 | -0.299693 | 0.870437  |
| H  | 0.123943  | -4.246174 | 3.640083  |
| H  | -1.696376 | -5.305954 | -0.112003 |
| C  | -0.816443 | -1.703752 | 3.816342  |
| H  | 0.091649  | -1.941621 | 4.386302  |
| H  | -0.728397 | -0.673558 | 3.448538  |
| H  | -1.666634 | -1.735553 | 4.517122  |
| C  | -2.927917 | -2.949559 | -0.629383 |
| H  | -3.729212 | -3.698470 | -0.721048 |
| H  | -3.391492 | -1.958141 | -0.532635 |
| H  | -2.356268 | -2.963241 | -1.568698 |

121

Figure\_S15-6\_AA-9b(NaO<sub>Ph</sub>)-ts(1,6minor)\_04 / electronic energy: -4439.04525456 a.u. / lowest freq: -267.46 cm<sup>-1</sup>

|   |          |           |           |
|---|----------|-----------|-----------|
| H | 2.251864 | 1.398679  | 3.342243  |
| H | 4.391513 | 0.942272  | 1.488803  |
| C | 3.317567 | 0.758992  | 1.575581  |
| C | 2.842191 | -0.513286 | 1.290436  |
| B | 3.796407 | -1.510152 | 0.560683  |
| O | 4.913715 | -1.097041 | -0.122523 |
| H | 7.372780 | -2.042732 | 0.044408  |
| H | 6.011613 | -2.929142 | 1.730185  |
| H | 7.221629 | -1.277300 | -1.554119 |
| O | 3.633136 | -2.870507 | 0.504859  |
| C | 6.922508 | -2.146802 | -0.951063 |
| C | 5.406782 | -2.221225 | -0.874670 |
| C | 5.737618 | -3.811255 | 1.132932  |
| C | 4.844014 | -3.428961 | -0.047055 |
| H | 5.189141 | -4.507183 | 1.783384  |
| H | 7.328922 | -3.050121 | -1.429637 |
| H | 6.659693 | -4.304878 | 0.795408  |
| C | 4.516592 | -4.662417 | -0.872426 |
| H | 4.094511 | -5.443531 | -0.223626 |
| H | 5.431404 | -5.062138 | -1.334803 |
| H | 3.008635 | 2.726290  | 2.426476  |
| C | 2.497018 | 1.760043  | 2.327339  |
| H | 1.532815 | 1.934817  | 1.817187  |
| H | 0.965049 | -0.359906 | 2.334025  |
| C | 1.487878 | -0.863122 | 1.515481  |

|    |           |           |           |
|----|-----------|-----------|-----------|
| H  | 1.216963  | -1.921864 | 1.405695  |
| H  | 3.793077  | -4.446001 | -1.667292 |
| H  | 5.024426  | -1.139127 | -2.697463 |
| C  | 4.792976  | -2.126000 | -2.271747 |
| H  | 3.698844  | -2.238110 | -2.235539 |
| H  | 5.198189  | -2.895393 | -2.944075 |
| C  | -3.639641 | 1.065480  | 1.448717  |
| H  | -4.527466 | 1.180403  | 0.814083  |
| C  | -3.579602 | -0.329194 | 2.078101  |
| H  | -3.673879 | -0.312736 | 3.173250  |
| C  | -1.634101 | 0.034475  | 0.825068  |
| C  | -1.699719 | -2.026915 | 2.133683  |
| C  | -1.849812 | -3.185581 | 1.357433  |
| C  | -1.017843 | -2.037962 | 3.364563  |
| C  | -1.241991 | -4.363167 | 1.811233  |
| C  | -0.429953 | -3.232741 | 3.782295  |
| C  | -0.530148 | -4.385749 | 3.005361  |
| H  | -0.057607 | -5.311083 | 3.341863  |
| Cu | 0.164459  | -0.204491 | 0.027424  |
| N  | -2.408676 | 1.107369  | 0.651040  |
| N  | -2.249433 | -0.794973 | 1.674720  |
| C  | 1.523259  | 0.068504  | -1.481656 |
| C  | 0.314094  | -0.384594 | -2.146942 |
| H  | -3.898782 | 0.997848  | -1.554817 |
| H  | -4.353511 | -0.999886 | 1.671765  |
| H  | -3.639808 | 1.874758  | 2.196395  |
| H  | 2.317022  | -0.675916 | -1.415759 |
| C  | 0.080415  | -1.832313 | -2.199512 |
| C  | -0.529842 | 0.461888  | -2.991036 |
| O  | 1.054780  | -2.522419 | -1.584532 |
| O  | -0.888387 | -2.411853 | -2.672556 |
| O  | -1.460849 | 0.081073  | -3.684871 |
| O  | -0.185230 | 1.755001  | -2.973763 |
| C  | -0.970690 | 2.636894  | -3.767176 |
| H  | -0.825732 | 2.428315  | -4.836729 |
| H  | -0.610554 | 3.645877  | -3.536231 |
| H  | -2.033308 | 2.527831  | -3.511473 |
| C  | 0.891056  | -3.918418 | -1.411700 |
| H  | -0.066986 | -4.145222 | -0.926247 |
| H  | 1.713057  | -4.227937 | -0.759019 |
| H  | 0.942252  | -4.444115 | -2.375939 |
| C  | -2.021857 | 2.269682  | -0.127437 |
| H  | -1.276216 | 1.913446  | -0.853940 |
| C  | -1.355054 | 3.354290  | 0.713444  |
| C  | -0.986071 | 4.571617  | 0.123026  |
| C  | -1.037618 | 3.153429  | 2.060304  |
| C  | -0.343678 | 5.562492  | 0.862162  |
| H  | -1.186185 | 4.752331  | -0.935030 |
| C  | -0.386759 | 4.140378  | 2.801362  |
| H  | -1.285692 | 2.206705  | 2.542272  |
| C  | -0.041048 | 5.351475  | 2.207309  |
| H  | -0.069533 | 6.502489  | 0.378165  |
| H  | -0.146968 | 3.954882  | 3.850501  |
| H  | 0.468921  | 6.124666  | 2.785647  |
| C  | -3.214134 | 2.781968  | -0.951182 |
| H  | -2.908890 | 3.708001  | -1.459207 |
| H  | -4.032275 | 3.072313  | -0.260830 |
| O  | -3.628662 | 1.887680  | -1.927121 |
| C  | 1.898824  | 1.382500  | -1.117951 |
| H  | 1.158190  | 2.181981  | -1.161485 |
| C  | 3.183033  | 1.655784  | -0.672465 |
| H  | 3.961379  | 0.920038  | -0.878819 |
| C  | 3.663124  | 3.004137  | -0.338697 |
| C  | 5.046059  | 3.244411  | -0.278900 |
| C  | 2.792987  | 4.066225  | -0.041960 |
| C  | 5.544161  | 4.501426  | 0.054196  |
| H  | 5.737063  | 2.424788  | -0.494798 |
| C  | 3.290464  | 5.322944  | 0.290836  |
| H  | 1.712911  | 3.907741  | -0.044246 |
| C  | 4.667098  | 5.548967  | 0.339875  |
| H  | 6.623628  | 4.664571  | 0.093886  |
| H  | 2.593113  | 6.130604  | 0.524663  |
| H  | 5.054986  | 6.535341  | 0.603641  |
| Na | -2.998379 | -1.338445 | -2.770880 |
| O  | -4.378881 | -0.521005 | -1.243783 |
| C  | -5.603435 | -0.615542 | -0.809916 |
| C  | -6.476075 | 0.508729  | -0.779932 |
| C  | -6.136191 | -1.838561 | -0.318369 |
| C  | -7.771277 | 0.412235  | -0.279485 |
| H  | -6.100940 | 1.456336  | -1.176904 |
| C  | -7.434059 | -1.920117 | 0.179029  |
| H  | -5.498176 | -2.725573 | -0.336232 |
| C  | -8.268160 | -0.798901 | 0.210334  |
| H  | -8.407992 | 1.302275  | -0.274914 |
| H  | -7.802931 | -2.880619 | 0.551740  |
| H  | -9.284264 | -0.869317 | 0.604324  |
| H  | 0.120357  | -3.256960 | 4.725828  |
| H  | -1.342113 | -5.276319 | 1.218575  |
| C  | -2.649040 | -3.188160 | 0.083401  |



|   |           |           |           |
|---|-----------|-----------|-----------|
| H | -3.204990 | -2.253264 | -0.066982 |
| H | -1.998958 | -3.323820 | -0.793887 |
| H | -3.365657 | -4.023101 | 0.087534  |
| C | -0.928608 | -0.796942 | 4.212194  |
| H | -0.138124 | -0.892585 | 4.968064  |
| H | -0.718952 | 0.096012  | 3.606081  |
| H | -1.876702 | -0.612301 | 4.742422  |

32

Figure\_S15-7\_dienoate / electronic energy: -841.927078481 a.u. / lowest freq: 24.55 cm-1

|   |           |           |           |
|---|-----------|-----------|-----------|
| C | -0.660544 | -0.726572 | 0.059153  |
| C | -1.860539 | -0.097447 | 0.115996  |
| H | -0.691600 | -1.818492 | -0.004770 |
| C | -1.976243 | 1.390665  | 0.160143  |
| C | -3.120576 | -0.891785 | 0.187355  |
| O | -3.041424 | 1.823605  | -0.507466 |
| O | -1.182749 | 2.134043  | 0.689285  |
| O | -4.147702 | -0.497504 | 0.683440  |
| O | -2.981802 | -2.118850 | -0.320932 |
| C | -4.097604 | -2.989729 | -0.195724 |
| H | -4.332384 | -3.170881 | 0.862818  |
| H | -3.810049 | -3.927003 | -0.683244 |
| H | -4.981752 | -2.562067 | -0.688186 |
| C | -3.254671 | 3.228152  | -0.535442 |
| H | -3.354009 | 3.627502  | 0.483524  |
| H | -4.184056 | 3.384216  | -1.092621 |
| H | -2.420438 | 3.737793  | -1.038016 |
| C | 0.656646  | -0.129211 | 0.062308  |
| H | 0.725624  | 0.955889  | 0.150505  |
| C | 1.759981  | -0.902956 | -0.019704 |
| H | 1.621029  | -1.988149 | -0.089650 |
| C | 3.156351  | -0.453635 | -0.025165 |
| C | 4.175093  | -1.416830 | -0.109525 |
| C | 3.522207  | 0.902114  | 0.053056  |
| C | 5.517020  | -1.042840 | -0.114390 |
| H | 3.907556  | -2.474776 | -0.172060 |
| C | 4.861836  | 1.275255  | 0.048166  |
| H | 2.754752  | 1.675486  | 0.118691  |
| C | 5.863995  | 0.305241  | -0.035401 |
| H | 6.294080  | -1.807149 | -0.179427 |
| H | 5.127957  | 2.332459  | 0.111300  |
| H | 6.914980  | 0.602284  | -0.038425 |

76

Figure\_S15-7\_9d(Na)-Cu-allyl\_01 / electronic energy: -3289.87323919 a.u. / lowest freq: 20.48 cm-1

|    |           |           |           |
|----|-----------|-----------|-----------|
| C  | 2.890494  | 1.919481  | -1.277302 |
| H  | 3.212834  | 1.619009  | -2.282905 |
| C  | 1.580347  | 2.708660  | -1.287786 |
| H  | 1.715166  | 3.773396  | -1.053559 |
| C  | 1.361334  | 0.845889  | 0.116302  |
| C  | -0.476920 | 2.468998  | 0.143962  |
| C  | -1.201053 | 3.344915  | -0.672658 |
| C  | -1.049124 | 2.021662  | 1.341390  |
| C  | -2.500751 | 3.731098  | -0.327753 |
| C  | -2.353152 | 2.373080  | 1.688914  |
| C  | -3.068439 | 3.232389  | 0.847613  |
| H  | -4.088296 | 3.522016  | 1.116164  |
| Cu | 0.549243  | -0.521771 | 1.237838  |
| N  | 2.543033  | 0.749000  | -0.472014 |
| N  | 0.804179  | 2.032970  | -0.243867 |
| H  | 1.066715  | 2.629079  | -2.259433 |
| H  | 3.717911  | 2.468759  | -0.801157 |
| C  | 3.344698  | -0.463934 | -0.515154 |
| H  | 2.901187  | -1.123898 | 0.249271  |
| C  | 4.775968  | -0.154327 | -0.107352 |
| C  | 5.877692  | -0.460143 | -0.912213 |
| C  | 5.005969  | 0.459152  | 1.132365  |
| C  | 7.175180  | -0.164497 | -0.487241 |
| H  | 5.732823  | -0.936167 | -1.883022 |
| C  | 6.297285  | 0.758235  | 1.558327  |
| H  | 4.151927  | 0.706681  | 1.769782  |
| C  | 7.389916  | 0.445116  | 0.746743  |
| H  | 8.022928  | -0.413557 | -1.129804 |
| H  | 6.453595  | 1.234919  | 2.528793  |
| H  | 8.405182  | 0.675575  | 1.077400  |
| C  | 3.137215  | -1.190296 | -1.873781 |
| H  | 3.774689  | -2.111853 | -1.794461 |
| H  | 3.662176  | -0.569468 | -2.653477 |
| O  | 1.845948  | -1.423998 | -2.140698 |
| C  | -0.451569 | -1.910882 | 2.208955  |
| H  | -1.214664 | -1.404047 | 2.822373  |
| H  | 0.177713  | -2.546649 | 2.852851  |
| C  | -1.044927 | -2.620703 | 1.056533  |
| C  | -0.492142 | -3.711033 | 0.455359  |
| H  | -0.988980 | -4.153163 | -0.417369 |
| C  | 0.787250  | -4.340968 | 0.920790  |
| H  | 1.118695  | -5.149002 | 0.253404  |
| H  | 1.593059  | -3.583472 | 0.969365  |
| H  | 0.701537  | -4.758930 | 1.940091  |
| B  | -2.306527 | -1.993764 | 0.382957  |
| O  | -3.373025 | -1.412180 | 1.004517  |

|    |           |           |           |
|----|-----------|-----------|-----------|
| O  | -2.415671 | -1.921873 | -0.995612 |
| C  | -4.386992 | -1.159047 | 0.008097  |
| C  | -3.540932 | -1.073394 | -1.313835 |
| C  | -5.133677 | 0.116193  | 0.360060  |
| C  | -5.338535 | -2.354768 | 0.029500  |
| C  | -4.233816 | -1.613380 | -2.553791 |
| C  | -2.982138 | 0.323768  | -1.572158 |
| H  | -4.479589 | -2.677383 | -2.447888 |
| H  | -3.576969 | -1.498793 | -3.428337 |
| H  | -5.161058 | -1.055202 | -2.750289 |
| H  | -4.818196 | -3.287688 | -0.232540 |
| H  | -6.175828 | -2.213317 | -0.667972 |
| H  | -5.748118 | -2.466329 | 1.043327  |
| H  | -2.476565 | 0.722952  | -0.681484 |
| H  | -3.773968 | 1.028313  | -1.862331 |
| H  | -2.252056 | 0.281035  | -2.394600 |
| H  | -4.449481 | 0.965059  | 0.476018  |
| H  | -5.678059 | -0.021758 | 1.305057  |
| H  | -5.865158 | 0.358733  | -0.425131 |
| Na | -0.132379 | -1.871828 | -1.732083 |
| C  | -3.288355 | 4.628767  | -1.246136 |
| H  | -4.131202 | 5.101149  | -0.723105 |
| H  | -2.656663 | 5.421816  | -1.671818 |
| H  | -3.701543 | 4.052122  | -2.089506 |
| C  | -2.973914 | 1.790798  | 2.930585  |
| H  | -2.277050 | 1.825374  | 3.780685  |
| H  | -3.894667 | 2.320460  | 3.211548  |
| H  | -3.228022 | 0.732756  | 2.756237  |
| H  | -0.769050 | 3.721967  | -1.600967 |
| H  | -0.472166 | 1.385437  | 2.015110  |

108

Figure\_S15-7\_AA-9d(Na)-ts(1,6major)\_01 / electronic energy: -4131.84208395 a.u. / lowest freq: -388.75 cm-1

|    |           |           |           |
|----|-----------|-----------|-----------|
| C  | -2.711428 | -3.560318 | -1.132305 |
| H  | -2.940555 | -4.392337 | -0.455983 |
| C  | -3.822044 | -2.516706 | -1.175235 |
| H  | -4.381319 | -2.522257 | -2.120455 |
| C  | -1.802443 | -1.482480 | -0.602707 |
| C  | -3.716520 | -0.015060 | -1.150647 |
| C  | -5.117856 | 0.045520  | -1.100061 |
| C  | -2.992944 | 1.160810  | -1.370541 |
| C  | -5.791194 | 1.256658  | -1.264968 |
| C  | -3.650939 | 2.385091  | -1.527585 |
| C  | -5.045495 | 2.420104  | -1.479188 |
| H  | -5.563011 | 3.375465  | -1.603033 |
| Cu | -0.439091 | -0.167115 | 0.015113  |
| N  | -1.575823 | -2.788080 | -0.629088 |
| N  | -3.077685 | -1.262639 | -1.013789 |
| C  | 0.291728  | 1.125930  | 1.468171  |
| C  | -0.772780 | 0.338840  | 2.044785  |
| Na | -2.895378 | -2.343495 | 2.760611  |
| H  | -4.538826 | -2.645827 | -0.347872 |
| H  | -2.482812 | -3.963920 | -2.130610 |
| H  | 1.292282  | 0.740652  | 1.688668  |
| C  | -2.190886 | 0.724592  | 2.110135  |
| C  | -0.403830 | -0.808671 | 2.891926  |
| O  | -2.423783 | 2.007660  | 1.827688  |
| O  | -3.113091 | -0.033989 | 2.371073  |
| O  | -1.084498 | -1.260615 | 3.795464  |
| O  | 0.788673  | -1.342336 | 2.595678  |
| C  | 1.119918  | -2.532643 | 3.306770  |
| H  | 1.273412  | -2.319422 | 4.374091  |
| H  | 2.050045  | -2.899797 | 2.862028  |
| H  | 0.306457  | -3.262190 | 3.179765  |
| C  | -3.779397 | 2.430074  | 1.825288  |
| H  | -4.391841 | 1.778338  | 1.188916  |
| H  | -3.778538 | 3.450142  | 1.425814  |
| H  | -4.185106 | 2.425348  | 2.847135  |
| C  | -0.396587 | -3.433138 | -0.055809 |
| H  | 0.156777  | -2.619573 | 0.435653  |
| C  | 0.509425  | -4.065965 | -1.088689 |
| C  | 0.113697  | -5.164826 | -1.865135 |
| C  | 1.810875  | -3.577008 | -1.249803 |
| C  | 0.986779  | -5.735439 | -2.792025 |
| H  | -0.883258 | -5.593867 | -1.743935 |
| C  | 2.685025  | -4.142105 | -2.176962 |
| H  | 2.152393  | -2.725057 | -0.658608 |
| C  | 2.274613  | -5.223836 | -2.955281 |
| H  | 0.657605  | -6.588742 | -3.389761 |
| H  | 3.687218  | -3.722584 | -2.291455 |
| H  | 2.954823  | -5.668397 | -3.685396 |
| C  | -0.830002 | -4.414434 | 1.075110  |
| H  | 0.150020  | -4.780473 | 1.489969  |
| H  | -1.246107 | -5.326425 | 0.561704  |
| O  | -1.652875 | -3.853165 | 1.964925  |
| C  | 0.822483  | -0.011040 | -1.639409 |
| H  | 0.077293  | 0.283313  | -2.390232 |
| H  | 1.052317  | -1.082375 | -1.669123 |
| C  | 1.910067  | 0.867157  | -1.402852 |
| C  | 1.836518  | 2.242102  | -1.627255 |

|   |           |           |           |
|---|-----------|-----------|-----------|
| H | 2.777802  | 2.795811  | -1.600745 |
| C | 0.705249  | 2.854033  | -2.395762 |
| H | 0.645384  | 2.446417  | -3.420227 |
| H | -0.257424 | 2.632002  | -1.909175 |
| H | 0.801225  | 3.945902  | -2.469218 |
| C | 0.264652  | 2.415375  | 0.896415  |
| H | -0.697708 | 2.904028  | 0.755150  |
| C | 1.439172  | 3.026760  | 0.473743  |
| H | 2.379378  | 2.570306  | 0.790077  |
| C | 1.545697  | 4.467074  | 0.162051  |
| C | 2.820178  | 5.032955  | -0.010463 |
| C | 0.430656  | 5.309280  | 0.027744  |
| C | 2.976406  | 6.382773  | -0.313412 |
| H | 3.700017  | 4.391303  | 0.091286  |
| C | 0.584028  | 6.659849  | -0.277325 |
| H | -0.574727 | 4.909557  | 0.169458  |
| C | 1.856624  | 7.204735  | -0.451628 |
| H | 3.978803  | 6.797776  | -0.442119 |
| H | -0.300443 | 7.293606  | -0.375782 |
| H | 1.976010  | 8.264327  | -0.687734 |
| C | -2.859170 | 3.645640  | -1.749864 |
| H | -2.328461 | 3.618546  | -2.713672 |
| H | -3.505951 | 4.533297  | -1.743514 |
| H | -2.096966 | 3.771127  | -0.967396 |
| C | -7.296253 | 1.311504  | -1.225679 |
| H | -7.646217 | 2.167711  | -0.630719 |
| H | -7.708889 | 1.430530  | -2.240169 |
| H | -7.724662 | 0.395764  | -0.795613 |
| H | -5.702509 | -0.857679 | -0.923482 |
| H | -1.904206 | 1.124885  | -1.436150 |
| B | 3.212845  | 0.333471  | -0.734838 |
| O | 4.088291  | 1.142500  | -0.055571 |
| O | 3.621695  | -0.974140 | -0.739793 |
| C | 5.269041  | 0.376300  | 0.243014  |
| C | 4.731333  | -1.101132 | 0.169044  |
| C | 5.720025  | -2.112219 | -0.390335 |
| H | 6.009007  | -1.869222 | -1.420635 |
| H | 6.626905  | -2.150982 | 0.231366  |
| H | 5.264774  | -3.113121 | -0.389931 |
| C | 4.163126  | -1.602277 | 1.494787  |
| H | 3.416057  | -0.905582 | 1.902650  |
| H | 3.666328  | -2.567336 | 1.319421  |
| H | 4.952744  | -1.754517 | 2.243763  |
| C | 5.795395  | 0.793317  | 1.607106  |
| H | 6.150585  | 1.833027  | 1.565445  |
| H | 5.015138  | 0.729706  | 2.376080  |
| H | 6.640080  | 0.155805  | 1.907801  |
| C | 6.295329  | 0.694273  | -0.843383 |
| H | 7.252426  | 0.187867  | -0.655677 |
| H | 5.929881  | 0.396781  | -1.837088 |
| H | 6.474539  | 1.778812  | -0.857786 |

108

Figure\_S15-7\_AA-9d(Na)-ts(1,6major)\_02 / electronic energy: -4131.84213530 a.u. / lowest freq: -365.14 cm<sup>-1</sup>

|    |           |           |           |
|----|-----------|-----------|-----------|
| C  | -1.419996 | -4.158800 | -1.063704 |
| H  | -1.423259 | -4.948513 | -0.303228 |
| C  | -2.800665 | -3.525033 | -1.245112 |
| H  | -3.225434 | -3.686782 | -2.245904 |
| C  | -1.272076 | -1.880809 | -0.581363 |
| C  | -3.537127 | -1.124424 | -1.187134 |
| C  | -4.880185 | -1.520318 | -1.229227 |
| C  | -3.221916 | 0.230706  | -1.340917 |
| C  | -5.900224 | -0.581636 | -1.409205 |
| C  | -4.227989 | 1.183388  | -1.512527 |
| C  | -5.561537 | 0.766298  | -1.551044 |
| H  | -6.352456 | 1.508503  | -1.689858 |
| Cu | -0.396853 | -0.217777 | 0.049592  |
| N  | -0.614289 | -3.029308 | -0.597954 |
| N  | -2.533328 | -2.098999 | -1.021303 |
| C  | -0.058117 | 1.190784  | 1.529318  |
| C  | -0.861374 | 0.124619  | 2.081674  |
| Na | -2.083527 | -3.077652 | 2.659084  |
| H  | -3.521328 | -3.901532 | -0.502496 |
| H  | -1.007198 | -4.566243 | -1.999414 |
| H  | 1.010074  | 1.093452  | 1.749790  |
| C  | -2.333880 | 0.075787  | 2.108904  |
| C  | -0.203258 | -0.867340 | 2.951533  |
| O  | -2.928952 | 1.240351  | 1.843292  |
| O  | -2.996527 | -0.927761 | 2.325445  |
| O  | -0.762366 | -1.513045 | 3.820342  |
| O  | 1.108816  | -1.010917 | 2.729586  |
| C  | 1.744149  | -2.040776 | 3.483924  |
| H  | 1.737924  | -1.798081 | 4.555704  |
| H  | 2.774332  | -2.091187 | 3.117412  |
| H  | 1.214640  | -2.989099 | 3.309556  |
| C  | -4.349378 | 1.242616  | 1.815429  |
| H  | -4.728657 | 0.451189  | 1.156183  |
| H  | -4.643842 | 2.225243  | 1.430839  |
| H  | -4.753218 | 1.097825  | 2.827621  |
| C  | 0.713481  | -3.227022 | -0.036757 |

|   |           |           |           |
|---|-----------|-----------|-----------|
| H | 0.960275  | -2.283386 | 0.478898  |
| C | 1.764463  | -3.473483 | -1.104330 |
| C | 3.034142  | -3.952500 | -0.749413 |
| C | 1.525689  | -3.188838 | -2.454209 |
| C | 4.029268  | -4.131759 | -1.708514 |
| H | 3.257031  | -4.180059 | 0.294494  |
| C | 2.520275  | -3.363597 | -3.416162 |
| H | 0.550293  | -2.805006 | -2.760475 |
| C | 3.778702  | -3.834676 | -3.048008 |
| H | 5.010168  | -4.504656 | -1.404017 |
| H | 2.308439  | -3.125565 | -4.461032 |
| H | 4.559732  | -3.969084 | -3.799526 |
| C | 0.627366  | -4.320426 | 1.078787  |
| H | 1.638104  | -4.314664 | 1.562996  |
| H | 0.600482  | -5.309021 | 0.538448  |
| O | -0.385593 | -4.109503 | 1.925680  |
| C | 0.673413  | 0.303294  | -1.654776 |
| H | -0.148581 | 0.411509  | -2.375138 |
| H | 1.186612  | -0.662496 | -1.731199 |
| C | 1.503232  | 1.423846  | -1.400567 |
| C | 1.091186  | 2.741699  | -1.577826 |
| H | 1.862395  | 3.514491  | -1.531481 |
| C | -0.168384 | 3.071428  | -2.321317 |
| H | -0.144510 | 2.674493  | -3.351476 |
| H | -1.040872 | 2.614860  | -1.826173 |
| H | -0.343136 | 4.154099  | -2.379454 |
| C | -0.439328 | 2.436041  | 0.983919  |
| H | -1.499559 | 2.649644  | 0.856363  |
| C | 0.522125  | 3.347458  | 0.568180  |
| H | 1.555446  | 3.148133  | 0.861556  |
| C | 0.237270  | 4.766281  | 0.277868  |
| C | 1.310456  | 5.666481  | 0.167459  |
| C | -1.061451 | 5.269556  | 0.098455  |
| C | 1.098125  | 7.013168  | -0.114931 |
| H | 2.329215  | 5.292180  | 0.302782  |
| C | -1.276282 | 6.616022  | -0.185938 |
| H | -1.920946 | 4.601739  | 0.178047  |
| C | -0.198788 | 7.496171  | -0.295455 |
| H | 1.950699  | 7.691825  | -0.193526 |
| H | -2.296528 | 6.982251  | -0.322583 |
| H | -0.369230 | 8.552097  | -0.516158 |
| C | -3.868369 | 2.638106  | -1.657124 |
| H | -3.358726 | 2.828483  | -2.614199 |
| H | -4.758418 | 3.280319  | -1.614299 |
| H | -3.179656 | 2.949669  | -0.858094 |
| C | -7.341220 | -1.021742 | -1.411953 |
| H | -7.981311 | -0.296249 | -1.932697 |
| H | -7.461748 | -2.000539 | -1.898047 |
| H | -7.720217 | -1.118955 | -0.381838 |
| H | -5.148599 | -2.571296 | -1.115405 |
| H | -2.179432 | 0.552088  | -1.338431 |
| B | 2.900305  | 1.143292  | -0.775190 |
| O | 3.586702  | 2.027935  | 0.016436  |
| O | 3.567834  | -0.039161 | -0.937640 |
| C | 4.899110  | 1.482084  | 0.253376  |
| C | 4.674239  | -0.052845 | -0.020837 |
| C | 5.848084  | -0.767239 | -0.671105 |
| H | 6.105642  | -0.322021 | -1.640237 |
| H | 6.733045  | -0.731940 | -0.018229 |
| H | 5.583865  | -1.820818 | -0.841284 |
| C | 4.205842  | -0.818302 | 1.213701  |
| H | 3.344359  | -0.322066 | 1.683250  |
| H | 3.883363  | -1.821401 | 0.898907  |
| H | 5.006136  | -0.924896 | 1.959687  |
| C | 5.323621  | 1.816090  | 1.674746  |
| H | 5.456279  | 2.902594  | 1.778632  |
| H | 4.572398  | 1.492446  | 2.406130  |
| H | 6.281411  | 1.330820  | 1.914484  |
| C | 5.845950  | 2.137676  | -0.750465 |
| H | 6.884756  | 1.814725  | -0.593498 |
| H | 5.558429  | 1.902150  | -1.785530 |
| H | 5.799504  | 3.228732  | -0.623480 |

108

Figure\_S15-7\_AA-9d(Na)-ts(1,6major)\_03 / electronic energy: -4131.84066850 a.u. / lowest freq: -367.11 cm<sup>-1</sup>

|    |           |           |           |
|----|-----------|-----------|-----------|
| C  | -1.462256 | -4.030582 | -1.212482 |
| H  | -1.545877 | -4.804502 | -0.438623 |
| C  | -2.803697 | -3.348073 | -1.492196 |
| H  | -3.107480 | -3.407682 | -2.547682 |
| C  | -1.291957 | -1.777405 | -0.631913 |
| C  | -3.537107 | -0.959475 | -1.227884 |
| C  | -4.870799 | -1.337691 | -1.421742 |
| C  | -3.223327 | 0.404355  | -1.155262 |
| C  | -5.884926 | -0.377526 | -1.510946 |
| C  | -4.222244 | 1.375551  | -1.216613 |
| C  | -5.551108 | 0.972692  | -1.396342 |
| H  | -6.338207 | 1.729315  | -1.452869 |
| Cu | -0.396176 | -0.146099 | 0.050988  |
| N  | -0.642645 | -2.928702 | -0.708487 |
| N  | -2.545013 | -1.953480 | -1.112473 |

|    |           |           |           |
|----|-----------|-----------|-----------|
| C  | 0.002205  | 1.294962  | 1.486217  |
| C  | -0.910784 | 0.323356  | 2.041504  |
| Na | -2.263271 | -2.875764 | 2.539197  |
| H  | -3.612345 | -3.774495 | -0.880584 |
| H  | -1.010208 | -4.475021 | -2.111100 |
| H  | 1.056461  | 1.126325  | 1.728831  |
| C  | -2.368155 | 0.569872  | 2.047648  |
| C  | -0.391647 | -0.712319 | 2.940323  |
| O  | -3.113836 | -0.556089 | 2.133536  |
| O  | -2.901306 | 1.652040  | 1.937446  |
| O  | -1.058387 | -1.330349 | 3.756936  |
| O  | 0.920273  | -0.939403 | 2.814000  |
| C  | 1.437246  | -2.016774 | 3.591558  |
| H  | 1.333752  | -1.806187 | 4.665033  |
| H  | 2.496756  | -2.097602 | 3.327739  |
| H  | 0.891407  | -2.936045 | 3.330861  |
| C  | -4.524020 | -0.371096 | 2.143783  |
| H  | -4.826595 | 0.277160  | 2.977526  |
| H  | -4.964314 | -1.367148 | 2.267875  |
| H  | -4.864509 | 0.072496  | 1.198065  |
| C  | 0.647795  | -3.181676 | -0.087034 |
| H  | 0.929461  | -2.235369 | 0.406447  |
| C  | 1.716858  | -3.530645 | -1.106644 |
| C  | 2.923022  | -4.119568 | -0.699924 |
| C  | 1.554606  | -3.241775 | -2.467198 |
| C  | 3.930644  | -4.402824 | -1.620523 |
| H  | 3.086859  | -4.355433 | 0.352879  |
| C  | 2.560966  | -3.522581 | -3.390649 |
| H  | 0.629756  | -2.774663 | -2.812006 |
| C  | 3.755770  | -4.104346 | -2.971482 |
| H  | 4.861351  | -4.859872 | -1.276153 |
| H  | 2.408211  | -3.281683 | -4.445066 |
| H  | 4.545873  | -4.323960 | -3.692755 |
| C  | 0.457010  | -4.229984 | 1.059010  |
| H  | 1.440312  | -4.246715 | 1.596569  |
| H  | 0.412738  | -5.235364 | 0.553687  |
| O  | -0.588465 | -3.946399 | 1.843957  |
| C  | 0.726852  | 0.273493  | -1.656198 |
| H  | -0.086302 | 0.403103  | -2.383044 |
| H  | 1.192655  | -0.717254 | -1.701819 |
| C  | 1.611205  | 1.356103  | -1.421565 |
| C  | 1.271947  | 2.687248  | -1.646199 |
| H  | 2.080076  | 3.422130  | -1.608566 |
| C  | 0.046853  | 3.056197  | -2.429559 |
| H  | 0.085934  | 2.645601  | -3.453710 |
| H  | -0.857368 | 2.637530  | -1.955659 |
| H  | -0.083966 | 4.143880  | -2.505515 |
| C  | -0.300099 | 2.543168  | 0.901893  |
| H  | -1.347972 | 2.807465  | 0.764611  |
| C  | 0.705201  | 3.394922  | 0.466735  |
| H  | 1.726125  | 3.162580  | 0.778258  |
| C  | 0.476480  | 4.813241  | 0.127302  |
| C  | 1.581389  | 5.672596  | 0.007699  |
| C  | -0.801976 | 5.353046  | -0.090148 |
| C  | 1.419427  | 7.016997  | -0.316975 |
| H  | 2.584746  | 5.268991  | 0.170723  |
| C  | -0.965844 | 6.697306  | -0.415815 |
| H  | -1.684238 | 4.715758  | -0.008549 |
| C  | 0.142644  | 7.537662  | -0.531697 |
| H  | 2.296051  | 7.663633  | -0.401261 |
| H  | -1.970736 | 7.093718  | -0.579331 |
| H  | 0.010989  | 8.592046  | -0.784189 |
| C  | -3.871145 | 2.828464  | -1.044043 |
| H  | -2.947030 | 3.086310  | -1.581118 |
| H  | -4.674361 | 3.486628  | -1.402088 |
| H  | -3.701721 | 3.036651  | 0.024307  |
| C  | -7.310595 | -0.814296 | -1.727248 |
| H  | -8.004955 | 0.035159  | -1.674958 |
| H  | -7.429954 | -1.288545 | -2.713904 |
| H  | -7.617948 | -1.554076 | -0.972787 |
| H  | -5.142594 | -2.390779 | -1.501540 |
| H  | -2.186169 | 0.725682  | -1.045498 |
| B  | 2.967222  | 1.007262  | -0.741757 |
| O  | 3.659223  | 1.848521  | 0.091100  |
| O  | 3.575053  | -0.211530 | -0.873843 |
| C  | 4.917582  | 1.220504  | 0.407927  |
| C  | 4.611733  | -0.296410 | 0.117555  |
| C  | 5.777824  | -1.090785 | -0.447712 |
| H  | 6.137371  | -0.667577 | -1.394162 |
| H  | 6.612073  | -1.114852 | 0.269134  |
| H  | 5.454181  | -2.123705 | -0.639536 |
| C  | 4.005039  | -1.024092 | 1.314929  |
| H  | 3.148535  | -0.469439 | 1.724283  |
| H  | 3.637167  | -2.003568 | 0.976380  |
| H  | 4.742534  | -1.184155 | 2.114366  |
| C  | 5.272876  | 1.530277  | 1.853297  |
| H  | 5.463292  | 2.607086  | 1.967620  |
| H  | 4.459711  | 1.253927  | 2.536327  |
| H  | 6.182902  | 0.988552  | 2.151352  |

|   |          |          |           |
|---|----------|----------|-----------|
| C | 5.963187 | 1.812435 | -0.535508 |
| H | 6.967823 | 1.423310 | -0.317928 |
| H | 5.723552 | 1.593975 | -1.586407 |
| H | 5.980292 | 2.904446 | -0.409102 |

108

Figure\_S15-7\_AA-9d(Na)-ts(1,6minor)\_01 / electronic energy: -4131.83826859 a.u. / lowest freq: -396.29 cm-1

|    |           |           |           |
|----|-----------|-----------|-----------|
| C  | 4.469926  | -0.443997 | 1.672550  |
| H  | 5.247146  | -1.041689 | 1.180404  |
| C  | 4.499512  | 1.026998  | 1.249706  |
| H  | 4.746261  | 1.708953  | 2.075439  |
| C  | 2.421749  | 0.104477  | 0.696218  |
| C  | 2.694159  | 2.516174  | 0.328613  |
| C  | 3.622554  | 3.539170  | 0.105580  |
| C  | 1.335007  | 2.773658  | 0.113683  |
| C  | 3.206557  | 4.798635  | -0.343625 |
| C  | 0.906044  | 4.009041  | -0.365093 |
| C  | 1.849125  | 5.019335  | -0.583949 |
| H  | 1.518011  | 5.994382  | -0.952441 |
| Cu | 0.651461  | -0.233012 | -0.145874 |
| N  | 3.153417  | -0.876718 | 1.197255  |
| N  | 3.129732  | 1.255260  | 0.775787  |
| C  | -0.449819 | -0.377166 | -1.908705 |
| C  | 0.950711  | -0.574103 | -2.219945 |
| Na | 4.395784  | -1.267744 | -1.911966 |
| H  | 5.218917  | 1.203147  | 0.434085  |
| H  | 4.556865  | -0.574590 | 2.761710  |
| H  | -0.771980 | 0.671056  | -1.906903 |
| C  | 1.796754  | 0.554814  | -2.631366 |
| C  | 1.557204  | -1.901068 | -2.399781 |
| O  | 1.102828  | 1.647176  | -2.967186 |
| O  | 3.019774  | 0.554075  | -2.655052 |
| O  | 2.551044  | -2.139089 | -3.064543 |
| O  | 0.935241  | -2.881995 | -1.730970 |
| C  | 1.568065  | -4.158285 | -1.755685 |
| H  | 1.565912  | -4.575960 | -2.772163 |
| H  | 0.975953  | -4.795886 | -1.089555 |
| H  | 2.604387  | -4.059483 | -1.397996 |
| C  | 1.854176  | 2.797963  | -3.322961 |
| H  | 2.591949  | 3.042654  | -2.547584 |
| H  | 1.131407  | 3.614819  | -3.423296 |
| H  | 2.372569  | 2.636210  | -4.279059 |
| C  | 2.729288  | -2.269726 | 1.190057  |
| H  | 2.000328  | -2.350750 | 0.369887  |
| C  | 2.030512  | -2.693264 | 2.462173  |
| C  | 1.303811  | -3.891954 | 2.458310  |
| C  | 2.047587  | -1.933595 | 3.636297  |
| C  | 0.623887  | -4.324069 | 3.594496  |
| H  | 1.253762  | -4.484814 | 1.541294  |
| C  | 1.367489  | -2.362807 | 4.776761  |
| H  | 2.573226  | -0.977399 | 3.661215  |
| C  | 0.654963  | -3.560385 | 4.762348  |
| H  | 0.058466  | -5.258332 | 3.564838  |
| H  | 1.389462  | -1.749953 | 5.680903  |
| H  | 0.118708  | -3.893730 | 5.653464  |
| C  | 3.933789  | -3.167413 | 0.769042  |
| H  | 3.517506  | -4.210119 | 0.766053  |
| H  | 4.635625  | -3.170081 | 1.651187  |
| O  | 4.476100  | -2.768885 | -0.387895 |
| C  | -0.617585 | -0.227119 | 1.499638  |
| H  | -0.259743 | 0.665067  | 2.027138  |
| H  | -0.161570 | -1.154496 | 1.875175  |
| C  | -1.998087 | -0.258720 | 1.179527  |
| C  | -2.643875 | -1.418897 | 0.748472  |
| H  | -3.735269 | -1.406444 | 0.754760  |
| C  | -1.975880 | -2.758440 | 0.801979  |
| H  | -0.987700 | -2.727335 | 0.312538  |
| H  | -1.801482 | -3.073755 | 1.845746  |
| H  | -2.581871 | -3.532649 | 0.308588  |
| C  | -1.483318 | -1.333013 | -1.904628 |
| H  | -1.228083 | -2.367889 | -2.130937 |
| C  | -2.769548 | -1.031796 | -1.482698 |
| H  | -3.013770 | 0.022045  | -1.329599 |
| C  | -3.949462 | -1.881475 | -1.751590 |
| C  | -5.230206 | -1.355439 | -1.509259 |
| C  | -3.856110 | -3.195219 | -2.237390 |
| C  | -6.375288 | -2.109163 | -1.751358 |
| H  | -5.312610 | -0.345042 | -1.099853 |
| C  | -5.002510 | -3.951400 | -2.476432 |
| H  | -2.878385 | -3.637161 | -2.438538 |
| C  | -6.267312 | -3.412922 | -2.238427 |
| H  | -7.359429 | -1.676133 | -1.557402 |
| H  | -4.905044 | -4.970339 | -2.858533 |
| H  | -7.164255 | -4.005613 | -2.431296 |
| C  | -0.550857 | 4.210838  | -0.677788 |
| H  | -1.177033 | 3.580697  | -0.030806 |
| H  | -0.854242 | 5.259895  | -0.551482 |
| H  | -0.760119 | 3.927434  | -1.722701 |
| C  | 4.218891  | 5.896659  | -0.543801 |
| H  | 3.849068  | 6.661840  | -1.240298 |

|   |           |          |           |
|---|-----------|----------|-----------|
| H | 4.442114  | 6.397217 | 0.412094  |
| H | 5.166978  | 5.501689 | -0.936412 |
| H | 4.686341  | 3.368745 | 0.274961  |
| H | 0.589000  | 2.008960 | 0.331241  |
| B | -2.867154 | 1.034726 | 1.243105  |
| O | -4.168686 | 1.066803 | 0.807004  |
| O | -2.470203 | 2.243035 | 1.761486  |
| C | -4.632911 | 2.425335 | 0.884714  |
| C | -3.662798 | 3.033453 | 1.958791  |
| C | -3.349024 | 4.508225 | 1.772070  |
| H | -2.917498 | 4.718525 | 0.787415  |
| H | -4.266143 | 5.105093 | 1.885539  |
| H | -2.630433 | 4.835287 | 2.537093  |
| C | -4.129722 | 2.778140 | 3.392489  |
| H | -4.379700 | 1.718700 | 3.550281  |
| H | -3.317260 | 3.042675 | 4.083975  |
| H | -5.009866 | 3.386284 | 3.644266  |
| C | -6.101976 | 2.428584 | 1.276122  |
| H | -6.702526 | 1.988364 | 0.467061  |
| H | -6.278214 | 1.844425 | 2.188036  |
| H | -6.455168 | 3.457239 | 1.442197  |
| C | -4.450664 | 3.041417 | -0.502266 |
| H | -4.848405 | 4.065103 | -0.546035 |
| H | -3.899948 | 3.064525 | -0.792358 |
| H | -4.992125 | 2.429854 | -1.238270 |

108

Figure\_S15-7\_AA-9d(Na)-ts(1,6minor)\_02 / electronic energy: -4131.83828091 a.u. / lowest freq: -396.51 cm-1

|    |           |           |           |
|----|-----------|-----------|-----------|
| C  | 4.468564  | -0.450417 | 1.674256  |
| H  | 5.244860  | -1.051139 | 1.184404  |
| C  | 4.502306  | 1.019437  | 1.248039  |
| H  | 4.754398  | 1.702260  | 2.071402  |
| C  | 2.421212  | 0.102479  | 0.698743  |
| C  | 2.699509  | 2.513522  | 0.330767  |
| C  | 3.629043  | 3.533763  | 0.106848  |
| C  | 1.339413  | 2.774651  | 0.119898  |
| C  | 3.214611  | 4.795469  | -0.340568 |
| C  | 0.912112  | 4.011465  | -0.354016 |
| C  | 1.857836  | 5.020559  | -0.574020 |
| H  | 1.527388  | 5.998220  | -0.935910 |
| Cu | 0.650782  | -0.231668 | -0.144472 |
| N  | 3.151258  | -0.880547 | 1.198689  |
| N  | 3.131933  | 1.251599  | 0.778111  |
| C  | -0.447999 | -0.374384 | -1.909086 |
| C  | 0.952842  | -0.571546 | -2.218622 |
| Na | 4.396551  | -1.268747 | -1.906743 |
| H  | 5.219531  | 1.191224  | 0.429483  |
| H  | 4.553930  | -0.578632 | 2.763853  |
| H  | -0.769924 | 0.673905  | -1.906947 |
| C  | 1.799993  | 0.557311  | -2.627916 |
| C  | 1.558879  | -1.898614 | -2.399849 |
| O  | 1.107130  | 1.650458  | -2.963336 |
| O  | 3.023058  | 0.555756  | -2.650226 |
| O  | 2.552759  | -2.136011 | -3.064779 |
| O  | 0.936464  | -2.880139 | -1.732501 |
| C  | 1.569257  | -4.156528 | -1.758474 |
| H  | 1.566936  | -4.573159 | -2.775388 |
| H  | 0.977032  | -4.794704 | -1.093000 |
| H  | 2.605580  | -4.057795 | -1.400604 |
| C  | 1.859465  | 2.801019  | -3.317675 |
| H  | 2.596514  | 3.044884  | -2.541332 |
| H  | 1.137307  | 3.618319  | -3.418516 |
| H  | 2.378924  | 2.639416  | -4.273218 |
| C  | 2.724006  | -2.272614 | 1.191760  |
| H  | 1.994640  | -2.352124 | 0.371795  |
| C  | 2.024745  | -2.694586 | 2.464147  |
| C  | 1.296531  | -3.892373 | 2.461018  |
| C  | 2.042584  | -1.934169 | 3.637778  |
| C  | 0.615944  | -4.322893 | 3.597416  |
| H  | 1.245711  | -4.485790 | 1.544406  |
| C  | 1.361819  | -2.361782 | 4.778446  |
| H  | 2.569360  | -0.978587 | 3.662147  |
| C  | 0.647821  | -3.558489 | 4.764772  |
| H  | 0.049354  | -5.256468 | 3.568296  |
| H  | 1.384420  | -1.748319 | 5.682158  |
| H  | 0.111031  | -3.890552 | 5.656046  |
| C  | 3.926419  | -3.172822 | 0.770257  |
| H  | 3.507922  | -4.214617 | 0.767056  |
| H  | 4.628558  | -3.177200 | 1.652129  |
| O  | 4.469195  | -2.775195 | -0.386826 |
| C  | -0.620484 | -0.226187 | 1.499397  |
| H  | -0.263405 | 0.665666  | 2.027989  |
| H  | -0.164891 | -1.153752 | 1.874986  |
| C  | -2.000570 | -0.257719 | 1.177551  |
| C  | -2.645628 | -1.417657 | 0.744647  |
| H  | -3.737031 | -1.405413 | 0.749660  |
| C  | -1.977493 | -2.757138 | 0.798007  |
| H  | -0.988792 | -2.725530 | 0.309659  |
| H  | -1.804163 | -3.073175 | 1.841727  |
| H  | -2.582795 | -3.531101 | 0.303388  |

|   |           |           |           |
|---|-----------|-----------|-----------|
| C | -1.481679 | -1.330051 | -1.906792 |
| H | -1.226333 | -2.364831 | -2.133445 |
| C | -2.768369 | -1.028912 | -1.486122 |
| H | -3.012617 | 0.024869  | -1.332688 |
| C | -3.948103 | -1.878193 | -1.757168 |
| C | -5.229080 | -1.352057 | -1.516295 |
| C | -3.854333 | -3.191674 | -2.243593 |
| C | -6.373965 | -2.105445 | -1.760374 |
| H | -5.311874 | -0.341889 | -1.106419 |
| C | -5.000540 | -3.947519 | -2.484622 |
| H | -2.876410 | -3.633674 | -2.443654 |
| C | -6.265567 | -3.408951 | -2.248023 |
| H | -7.358290 | -1.672346 | -1.567496 |
| H | -4.902739 | -4.966258 | -2.867171 |
| H | -7.162355 | -4.001377 | -2.442430 |
| C | -0.545769 | 4.220994  | -0.656877 |
| H | -1.170912 | 3.586784  | -0.012896 |
| H | -0.844510 | 5.269856  | -0.518245 |
| H | -0.761946 | 3.949588  | -1.703545 |
| C | 4.238582  | 5.877614  | -0.566622 |
| H | 3.776375  | 6.794113  | -0.957551 |
| H | 4.756590  | 6.130645  | 0.371324  |
| H | 5.006554  | 5.550288  | -1.283926 |
| H | 4.692972  | 3.362000  | 0.274867  |
| H | 0.592432  | 2.011847  | 0.340611  |
| B | -2.870227 | 1.035331  | 1.241440  |
| O | -4.170713 | 1.067624  | 0.802263  |
| O | -2.475175 | 2.242835  | 1.763182  |
| C | -4.635672 | 2.425816  | 0.881283  |
| C | -3.668674 | 3.032278  | 1.959049  |
| C | -3.355393 | 4.507610  | 1.776030  |
| H | -2.922690 | 4.720309  | 0.792418  |
| H | -4.273028 | 5.103682  | 1.889490  |
| H | -2.638046 | 4.833402  | 2.542759  |
| C | -4.139109 | 2.773884  | 3.391040  |
| H | -4.388639 | 1.713952  | 3.546210  |
| H | -3.328676 | 3.037787  | 4.085144  |
| H | -5.020412 | 3.380824  | 3.641652  |
| C | -6.105776 | 2.427757  | 1.268721  |
| H | -6.703924 | 1.988812  | 0.457191  |
| H | -6.284211 | 1.841779  | 2.179046  |
| H | -6.459851 | 3.455945  | 1.435787  |
| C | -4.449752 | 3.044582  | -0.504023 |
| H | -4.848185 | 4.068029  | -0.547085 |
| H | -3.388126 | 3.069098  | -0.790737 |
| H | -4.988452 | 2.433943  | -1.242817 |

108

Figure\_S15-7\_AA-9d(Na)-ts(1,6minor)\_03 / electronic energy: -4131.83588529 a.u. / lowest freq: -368.17 cm<sup>-1</sup>

|    |           |           |           |
|----|-----------|-----------|-----------|
| C  | -2.202324 | 2.335266  | 1.832175  |
| H  | -0.580844 | 3.819869  | 1.475227  |
| C  | -0.821160 | 2.755301  | 1.423502  |
| H  | -2.928308 | 3.153629  | 1.732796  |
| H  | -1.969920 | 7.610749  | -0.265140 |
| H  | -0.454640 | 5.656800  | -0.437847 |
| C  | -2.387339 | 6.614389  | -0.428638 |
| C  | -1.535430 | 5.517436  | -0.529864 |
| H  | -4.439923 | 7.299393  | -0.459165 |
| C  | -3.767820 | 6.441930  | -0.536826 |
| C  | -2.036563 | 4.221979  | -0.742579 |
| C  | -4.281988 | 5.161354  | -0.746639 |
| C  | -1.084448 | 3.097981  | -0.838751 |
| H  | -0.036857 | 3.401784  | -0.889766 |
| C  | -3.428337 | 4.065019  | -0.847987 |
| H  | -5.360952 | 5.013403  | -0.833814 |
| H  | -3.856287 | 3.073306  | -1.006496 |
| C  | -1.413816 | 1.852007  | -1.350746 |
| H  | -2.457628 | 1.560238  | -1.450345 |
| C  | 0.241330  | 1.854905  | 1.450314  |
| H  | 0.605994  | 1.296488  | -1.679791 |
| C  | -0.417024 | 0.906421  | -1.669420 |
| H  | -0.837655 | 0.105549  | 2.159628  |
| C  | 0.062539  | 0.461896  | 1.640342  |
| H  | 0.968121  | -0.101205 | 1.886442  |
| Cu | -0.246935 | -0.514590 | -0.165770 |
| C  | -0.207205 | -2.378418 | 0.505090  |
| N  | 0.847271  | -3.168651 | 0.775518  |
| H  | -2.795088 | -1.435367 | 5.150946  |
| N  | -1.317497 | -3.036739 | 0.807871  |
| C  | -1.831519 | -0.969067 | -2.728242 |
| O  | -2.914119 | -0.459405 | -2.131003 |
| C  | -0.555663 | -0.408451 | -2.261620 |
| O  | 0.710556  | -2.310638 | -2.997771 |
| C  | 0.637812  | -1.114888 | -2.757511 |
| C  | -2.650654 | -2.515613 | 0.564716  |
| C  | -1.069044 | -4.414362 | 1.242001  |
| H  | -1.402953 | -5.101113 | 0.449667  |
| C  | 0.450030  | -4.418813 | 1.437690  |
| H  | 0.740026  | -4.387633 | 2.501491  |
| C  | 2.198554  | -2.717665 | 0.824472  |



|    |           |           |           |
|----|-----------|-----------|-----------|
| C  | 3.062346  | -2.965978 | -0.243668 |
| C  | 2.657188  | -2.070450 | 1.967806  |
| C  | 4.398664  | -2.564743 | -0.170763 |
| C  | 3.983477  | -1.635378 | 2.056706  |
| C  | 4.836944  | -1.902517 | 0.984477  |
| H  | 5.882768  | -1.585686 | 1.046024  |
| Na | -1.209563 | -3.807709 | -2.583772 |
| H  | 0.942972  | -5.284144 | 0.973896  |
| H  | -1.619948 | -4.649881 | 2.163221  |
| O  | 1.700586  | -0.315062 | -2.910034 |
| O  | -1.943916 | -1.827135 | -3.588266 |
| C  | -4.160447 | -1.052607 | -2.486453 |
| H  | -4.392996 | -0.862833 | -3.543528 |
| H  | -4.911197 | -0.575192 | -1.846788 |
| H  | -4.110422 | -2.136537 | -2.303551 |
| C  | 2.907600  | -0.917044 | -3.344956 |
| H  | 3.250169  | -1.667569 | -2.622351 |
| H  | 3.643285  | -0.108907 | -3.418472 |
| H  | 2.773211  | -1.396217 | -4.324642 |
| H  | -2.527235 | -1.706539 | -0.170166 |
| C  | -3.277019 | -1.907248 | 1.801991  |
| C  | -4.480529 | -1.198877 | 1.673939  |
| C  | -2.684204 | -1.977182 | 3.067109  |
| C  | -5.078085 | -0.591386 | 2.775677  |
| H  | -4.947418 | -1.107498 | 0.690250  |
| C  | -3.279653 | -1.369843 | 4.174017  |
| H  | -1.728308 | -2.489869 | 3.190231  |
| C  | -4.480621 | -0.677190 | 4.034281  |
| H  | -6.013640 | -0.041645 | 2.649623  |
| H  | -4.945268 | -0.198782 | 4.899217  |
| C  | -3.496734 | -3.604572 | -0.163979 |
| H  | -4.507297 | -3.136064 | -0.303784 |
| H  | -3.688322 | -4.409163 | 0.601438  |
| O  | -2.906773 | -4.021075 | -1.292305 |
| H  | -2.552015 | 1.488243  | 1.214951  |
| H  | -2.225573 | 1.984573  | 2.879173  |
| C  | 4.443119  | -0.868755 | 3.266258  |
| H  | 4.105176  | -1.348652 | 4.196365  |
| H  | 5.537671  | -0.777907 | 3.300231  |
| H  | 4.015737  | 0.145727  | 3.238398  |
| C  | 5.356867  | -2.811949 | -1.306783 |
| H  | 5.625627  | -1.866033 | -1.803807 |
| H  | 6.291725  | -3.263769 | -0.943573 |
| H  | 4.925578  | -3.481265 | -2.063931 |
| H  | 2.674510  | -3.473826 | -1.129513 |
| H  | 1.965882  | -1.899015 | 2.796616  |
| B  | 1.674134  | 2.326823  | 1.060192  |
| O  | 1.938201  | 3.479112  | 0.365260  |
| O  | 2.808583  | 1.587851  | 1.284292  |
| C  | 3.365938  | 3.605432  | 0.229766  |
| C  | 3.849305  | 2.123912  | 0.447796  |
| C  | 3.848318  | 1.295020  | -0.835693 |
| H  | 2.891913  | 1.382399  | -1.370248 |
| H  | 4.658652  | 1.597057  | -1.514594 |
| H  | 3.986973  | 0.236711  | -0.571364 |
| C  | 5.190375  | 1.994086  | 1.151068  |
| H  | 5.977311  | 2.500105  | 0.572194  |
| H  | 5.163394  | 2.425920  | 2.159445  |
| H  | 5.459522  | 0.932633  | 1.238299  |
| C  | 3.841390  | 4.557450  | 1.325919  |
| H  | 3.306633  | 5.512730  | 1.226267  |
| H  | 3.632999  | 4.151015  | 2.326255  |
| H  | 4.919534  | 4.755359  | 1.245728  |
| C  | 3.680273  | 4.179215  | -1.142988 |
| H  | 4.766489  | 4.191649  | -1.317195 |
| H  | 3.202418  | 3.598051  | -1.941944 |
| H  | 3.312020  | 5.213281  | -1.207496 |

108

Figure\_S15-7\_AA-9d(Na)-ts(1,6minor)\_04 / electronic energy: -4131.83709746 a.u. / lowest freq: -406.05 cm<sup>-1</sup>

|    |           |           |           |
|----|-----------|-----------|-----------|
| C  | 4.409379  | 0.010152  | 1.720521  |
| H  | 5.328157  | -0.460761 | 1.350171  |
| C  | 4.274723  | 1.466963  | 1.283767  |
| H  | 4.417397  | 2.176901  | 2.109627  |
| C  | 2.378901  | 0.269989  | 0.612624  |
| C  | 2.290774  | 2.721055  | 0.392753  |
| C  | 3.069575  | 3.871044  | 0.213618  |
| C  | 0.907193  | 2.804478  | 0.201146  |
| C  | 2.480923  | 5.084800  | -0.160132 |
| C  | 0.309032  | 3.992576  | -0.212400 |
| C  | 1.102182  | 5.132298  | -0.378815 |
| H  | 0.637257  | 6.071605  | -0.690820 |
| Cu | 0.636435  | -0.172473 | -0.244493 |
| N  | 3.231666  | -0.610472 | 1.112354  |
| N  | 2.898098  | 1.513268  | 0.782290  |
| C  | -0.595842 | -0.208811 | -1.932268 |
| C  | 0.788075  | -0.218457 | -2.353313 |
| Na | 4.268120  | -0.465351 | -2.397868 |
| H  | 4.983480  | 1.724370  | 0.479716  |
| H  | 4.370146  | -0.097361 | 2.815093  |

|   |           |           |           |
|---|-----------|-----------|-----------|
| H | -1.025438 | 0.791294  | -1.801567 |
| C | 1.456659  | 1.021629  | -2.763280 |
| C | 1.517247  | -1.458190 | -2.665376 |
| O | 0.618515  | 2.043074  | -2.967068 |
| O | 2.663564  | 1.166046  | -2.903530 |
| O | 2.439373  | -1.556150 | -3.454951 |
| O | 1.096742  | -2.519660 | -1.962642 |
| C | 1.865803  | -3.711372 | -2.099515 |
| H | 1.753976  | -4.132987 | -3.108593 |
| H | 1.465923  | -4.410566 | -1.356156 |
| H | 2.923731  | -3.483451 | -1.900125 |
| C | 1.210818  | 3.285874  | -3.312708 |
| H | 1.968035  | 3.578566  | -2.573521 |
| H | 0.398423  | 4.020449  | -3.325339 |
| H | 1.678346  | 3.224829  | -4.305918 |
| C | 3.096901  | -2.056456 | 0.956762  |
| H | 2.230216  | -2.181265 | 0.292914  |
| C | 2.808210  | -2.782260 | 2.251567  |
| C | 3.728374  | -2.830213 | 3.308315  |
| C | 1.608103  | -3.490338 | 2.389270  |
| C | 3.439467  | -3.536406 | 4.476142  |
| H | 4.691162  | -2.322741 | 3.221039  |
| C | 1.315123  | -4.199087 | 3.553300  |
| H | 0.888633  | -3.485314 | 1.567201  |
| C | 2.229891  | -4.219074 | 4.605627  |
| H | 4.169322  | -3.557185 | 5.288648  |
| H | 0.367412  | -4.735964 | 3.637461  |
| H | 2.004487  | -4.769110 | 5.521962  |
| C | 4.322989  | -2.627124 | 0.183068  |
| H | 4.080963  | -3.721482 | 0.082922  |
| H | 5.185702  | -2.620875 | 0.907466  |
| O | 4.551927  | -1.985831 | -0.965970 |
| C | -0.533129 | -0.456412 | 1.461914  |
| H | -0.218473 | 0.407057  | 2.059849  |
| H | 0.018742  | -1.370430 | 1.719070  |
| C | -1.925725 | -0.576233 | 1.221886  |
| C | -2.512838 | -1.733164 | 0.707555  |
| H | -3.599097 | -1.807052 | 0.783541  |
| C | -1.757656 | -3.020273 | 0.578357  |
| H | -0.792480 | -2.862208 | 0.068157  |
| H | -1.539218 | -3.450206 | 1.571651  |
| H | -2.329079 | -3.767834 | 0.008907  |
| C | -1.521372 | -1.268946 | -1.969677 |
| H | -1.172815 | -2.243416 | -2.313080 |
| C | -2.804057 | -1.149587 | -1.455148 |
| H | -3.144829 | -0.146097 | -1.187618 |
| C | -3.906525 | -2.090326 | -1.749986 |
| C | -5.213406 | -1.744152 | -1.365112 |
| C | -3.713002 | -3.322893 | -2.392925 |
| C | -6.286530 | -2.594472 | -1.616210 |
| H | -5.371417 | -0.798110 | -0.839972 |
| C | -4.786721 | -4.176505 | -2.640944 |
| H | -2.713077 | -3.622259 | -2.712764 |
| C | -6.078686 | -3.817774 | -2.255984 |
| H | -7.293150 | -2.302503 | -1.307490 |
| H | -4.611607 | -5.130576 | -3.143590 |
| H | -6.918343 | -4.487595 | -2.454080 |
| C | -1.163185 | 4.001947  | -0.515322 |
| H | -1.695607 | 3.304278  | 0.145583  |
| H | -1.601613 | 5.003581  | -0.401897 |
| H | -1.338362 | 3.673694  | -1.553215 |
| C | 3.330787  | 6.320678  | -0.304470 |
| H | 2.835297  | 7.077721  | -0.927913 |
| H | 3.523793  | 6.776252  | 0.680089  |
| H | 4.306660  | 6.088212  | -0.754597 |
| H | 4.149475  | 3.836610  | 0.364425  |
| H | 0.269646  | 1.942029  | 0.398126  |
| B | -2.889705 | 0.622074  | 1.481092  |
| O | -4.230491 | 0.562671  | 1.190817  |
| O | -2.540142 | 1.821344  | 2.050749  |
| C | -4.801431 | 1.858961  | 1.438530  |
| C | -3.763530 | 2.482392  | 2.439374  |
| C | -3.598047 | 3.989043  | 2.330690  |
| H | -3.298117 | 4.302275  | 1.324690  |
| H | -4.543623 | 4.491023  | 2.584019  |
| H | -2.829410 | 4.330054  | 3.038811  |
| C | -4.032216 | 2.093837  | 3.893757  |
| H | -4.175569 | 1.008577  | 4.000326  |
| H | -3.165506 | 2.384104  | 4.504504  |
| H | -4.921205 | 2.604106  | 4.289768  |
| C | -6.202586 | 1.686312  | 2.003968  |
| H | -6.863731 | 1.258297  | 1.236703  |
| H | -6.207425 | 1.013713  | 2.870850  |
| H | -6.619083 | 2.658098  | 2.308140  |
| C | -4.858421 | 2.589291  | 0.097454  |
| H | -5.341696 | 3.571813  | 0.193112  |
| H | -3.853177 | 2.732150  | -0.324720 |
| H | -5.442253 | 1.985642  | -0.612228 |

Figure\_S15-7\_AA-9d(Na)-ts(1,6minor)\_05 / electronic energy: -4131.83763873 a.u. / lowest freq: -403.75 cm-1

|    |           |           |           |
|----|-----------|-----------|-----------|
| C  | -2.283685 | -2.324647 | 1.205320  |
| H  | -3.889046 | -0.791990 | 1.120698  |
| C  | -2.807317 | -0.928909 | 1.072594  |
| H  | -2.996696 | -3.066744 | 0.817918  |
| H  | -7.616654 | -1.031149 | -1.090547 |
| H  | -5.486616 | 0.212287  | -0.792428 |
| C  | -6.663749 | -1.534874 | -1.269050 |
| C  | -5.471583 | -0.832774 | -1.113463 |
| H  | -7.577300 | -3.430307 | -1.771957 |
| C  | -6.643145 | -2.877953 | -1.648954 |
| C  | -4.229956 | -1.451316 | -1.338409 |
| C  | -5.417547 | -3.507098 | -1.869685 |
| C  | -2.995057 | -0.657213 | -1.157339 |
| H  | -3.183075 | 0.413517  | -1.057217 |
| C  | -4.224485 | -2.802968 | -1.717429 |
| H  | -5.388257 | -4.558412 | -2.165759 |
| H  | -3.278068 | -3.315849 | -1.898937 |
| C  | -1.751723 | -1.050645 | -1.634401 |
| H  | -1.579860 | -2.102170 | -1.852993 |
| C  | -2.016819 | 0.182177  | 1.379124  |
| H  | -0.889794 | 0.898920  | -1.668342 |
| C  | -0.656692 | -0.170477 | -1.723187 |
| H  | -0.272060 | -0.856350 | 2.106508  |
| C  | -0.631691 | 0.076970  | 1.651286  |
| H  | -0.150830 | 0.969062  | 2.070348  |
| Cu | 0.573075  | -0.191479 | -0.034866 |
| C  | 2.421102  | -0.331264 | 0.706579  |
| N  | 3.416821  | 0.573339  | 0.859586  |
| H  | 0.950840  | -2.474470 | 5.407811  |
| N  | 2.890236  | -1.524983 | 1.040042  |
| C  | 1.113220  | -1.809985 | -2.609621 |
| O  | 0.426420  | -2.817157 | -2.059830 |
| C  | 0.691801  | -0.471556 | -2.161350 |
| O  | 2.845069  | 0.472093  | -2.626523 |
| C  | 1.640376  | 0.608811  | -2.461097 |
| C  | 2.148961  | -2.764049 | 0.859716  |
| C  | 4.279808  | -1.501137 | 1.503768  |
| H  | 4.866444  | -2.245940 | 0.954308  |
| C  | 4.698593  | -0.070978 | 1.170710  |
| H  | 5.202030  | 0.440437  | 2.002388  |
| C  | 3.334206  | 1.957569  | 0.613876  |
| C  | 4.493810  | 2.674159  | 0.293441  |
| C  | 2.117177  | 2.638342  | 0.723409  |
| C  | 4.445461  | 4.054538  | 0.074163  |
| C  | 2.051406  | 4.015545  | 0.510619  |
| C  | 3.219648  | 4.713184  | 0.188869  |
| H  | 3.171452  | 5.793767  | 0.024760  |
| Na | 3.960593  | -1.626375 | -2.156138 |
| H  | 5.363756  | -0.037718 | 0.291941  |
| H  | 4.332675  | -1.719720 | 2.581954  |
| O  | 1.075924  | 1.823327  | -2.495603 |
| O  | 2.006494  | -2.032350 | -3.409640 |
| C  | 0.854433  | -4.134356 | -2.394754 |
| H  | 0.713915  | -4.327159 | -3.467541 |
| H  | 0.221384  | -4.808631 | -1.806864 |
| H  | 1.915089  | -4.246862 | -2.123996 |
| C  | 1.939536  | 2.925737  | -2.726307 |
| H  | 2.789415  | 2.913986  | -2.031552 |
| H  | 1.336385  | 3.825637  | -2.563894 |
| H  | 2.316939  | 2.908085  | -3.759176 |
| H  | 1.385559  | -2.548407 | 0.096042  |
| C  | 1.436550  | -3.227587 | 2.111372  |
| C  | 0.588852  | -4.342212 | 2.036221  |
| C  | 1.550276  | -2.566494 | 3.338893  |
| C  | -0.111862 | -4.788170 | 3.153967  |
| H  | 0.457405  | -4.854490 | 1.080015  |
| C  | 0.848753  | -3.009916 | 4.461124  |
| H  | 2.174671  | -1.674647 | 3.420426  |
| C  | 0.016881  | -4.124466 | 4.375075  |
| H  | -0.773143 | -5.653551 | 3.068647  |
| H  | -0.535167 | -4.470030 | 5.251804  |
| C  | 3.098824  | -3.818946 | 0.206928  |
| H  | 2.451887  | -4.718919 | 0.038497  |
| H  | 3.797395  | -4.150663 | 1.026399  |
| O  | 3.699045  | -3.344787 | -0.892728 |
| H  | -1.329253 | -2.441836 | 0.663753  |
| H  | -2.070638 | -2.574068 | 2.259717  |
| C  | 0.738446  | 4.738105  | 0.634950  |
| H  | -0.070871 | 4.046273  | 0.901299  |
| H  | 0.791215  | 5.523462  | 1.404875  |
| H  | 0.473355  | 5.234155  | -0.312472 |
| C  | 5.692738  | 4.822057  | -0.281281 |
| H  | 5.579785  | 5.325113  | -1.253681 |
| H  | 5.899843  | 5.603000  | 0.466279  |
| H  | 6.571202  | 4.164851  | -0.338582 |
| H  | 5.452778  | 2.163316  | 0.201581  |
| H  | 1.210861  | 2.094963  | 0.987573  |
| B  | -2.713592 | 1.567057  | 1.208291  |

|   |           |          |           |
|---|-----------|----------|-----------|
| O | -4.057567 | 1.675495 | 0.953140  |
| O | -2.091612 | 2.790341 | 1.206422  |
| C | -4.408167 | 3.068388 | 0.967376  |
| C | -3.025999 | 3.751977 | 0.668778  |
| C | -2.733295 | 3.865927 | -0.827459 |
| H | -2.902076 | 2.909260 | -1.343699 |
| H | -3.360835 | 4.632735 | -1.302616 |
| H | -1.679687 | 4.142631 | -0.967934 |
| C | -2.836140 | 5.097626 | 1.350665  |
| H | -3.644016 | 5.785731 | 1.060708  |
| H | -2.834341 | 4.998367 | 2.443430  |
| H | -1.883492 | 5.550241 | 1.045050  |
| C | -4.944975 | 3.384280 | 2.363004  |
| H | -5.783716 | 2.708084 | 2.581153  |
| H | -4.174492 | 3.230442 | 3.132575  |
| H | -5.307813 | 4.419340 | 2.432388  |
| C | -5.480745 | 3.320479 | -0.081096 |
| H | -5.683893 | 4.397523 | -0.176569 |
| H | -5.184458 | 2.931011 | -1.063531 |
| H | -6.414829 | 2.822135 | 0.215679  |

108

Figure\_S15-7\_AA-9d(Na)-ts(1,6minor)\_06 / electronic energy: -4131.83545844 a.u. / lowest freq: -358.72 cm-1

|    |           |           |           |
|----|-----------|-----------|-----------|
| C  | 0.509621  | -4.449655 | 1.410307  |
| H  | 0.463506  | -5.212815 | 0.618909  |
| C  | 1.935013  | -3.952827 | 1.667958  |
| H  | 2.142862  | -3.797282 | 2.739827  |
| C  | 0.697772  | -2.260007 | 0.638092  |
| C  | 3.090380  | -1.826570 | 0.954328  |
| C  | 4.046353  | -1.985337 | -0.048944 |
| C  | 3.268745  | -0.875006 | 1.954648  |
| C  | 5.185814  | -1.177237 | -0.067496 |
| C  | 4.386755  | -0.034960 | 1.944707  |
| C  | 5.330633  | -0.201892 | 0.927959  |
| H  | 6.210106  | 0.448895  | 0.908450  |
| Cu | 0.030549  | -0.541893 | -0.091216 |
| N  | -0.155578 | -3.233997 | 0.930370  |
| N  | 1.936281  | -2.660552 | 0.970261  |
| C  | -0.650377 | 0.690657  | -1.617106 |
| C  | -0.168443 | -0.540775 | -2.208373 |
| Na | 0.630708  | -3.856533 | -2.406017 |
| H  | 2.706087  | -4.622515 | 1.262958  |
| H  | 0.024565  | -4.846115 | 2.312773  |
| H  | 0.090965  | 1.493668  | -1.590271 |
| C  | 1.259662  | -0.667358 | -2.547712 |
| C  | -1.041068 | -1.563900 | -2.802521 |
| O  | 1.908036  | 0.506367  | -2.533381 |
| O  | 1.847098  | -1.710746 | -2.787951 |
| O  | -0.692098 | -2.373294 | -3.646670 |
| O  | -2.298877 | -1.549522 | -2.352211 |
| C  | -3.150928 | -2.581466 | -2.842135 |
| H  | -3.306266 | -2.474675 | -3.924771 |
| H  | -4.103997 | -2.456391 | -2.315960 |
| H  | -2.695979 | -3.558289 | -2.619177 |
| C  | 3.310629  | 0.490547  | -2.741134 |
| H  | 3.822352  | 0.071178  | -1.864818 |
| H  | 3.607031  | 1.536180  | -2.882580 |
| H  | 3.571277  | -0.096898 | -3.631646 |
| C  | -1.548985 | -3.207703 | 0.519711  |
| H  | -1.627195 | -2.401400 | -0.225199 |
| C  | -2.495789 | -2.865397 | 1.649011  |
| C  | -3.843649 | -2.617540 | 1.350577  |
| C  | -2.076716 | -2.726287 | 2.976183  |
| C  | -4.746462 | -2.257226 | 2.347931  |
| H  | -4.186033 | -2.690066 | 0.315263  |
| C  | -2.978392 | -2.364471 | 3.978641  |
| H  | -1.025379 | -2.877166 | 3.229027  |
| C  | -4.317330 | -2.131436 | 3.670372  |
| H  | -5.790368 | -2.063397 | 2.090828  |
| H  | -2.626464 | -2.255893 | 5.007268  |
| H  | -5.022080 | -1.842644 | 4.453090  |
| C  | -1.864747 | -4.509929 | -0.278283 |
| H  | -2.948282 | -4.422101 | -0.554683 |
| H  | -1.856353 | -5.346917 | 0.475620  |
| O  | -1.029146 | -4.669463 | -1.314681 |
| C  | -0.097941 | 0.529920  | 1.680131  |
| H  | 0.960603  | 0.388195  | 1.919020  |
| H  | -0.771401 | -0.137313 | 2.234449  |
| C  | -0.498312 | 1.867839  | 1.439742  |
| C  | -1.833779 | 2.261049  | 1.418548  |
| H  | -2.041772 | 3.333928  | 1.418235  |
| C  | -2.921086 | 1.343214  | 1.894104  |
| H  | -2.913152 | 0.395059  | 1.326914  |
| H  | -2.782666 | 1.071921  | 2.955617  |
| H  | -3.916003 | 1.796081  | 1.788308  |
| C  | -1.973179 | 1.087877  | -1.329630 |
| H  | -2.771527 | 0.355518  | -1.430601 |
| C  | -2.248235 | 2.360262  | -0.850858 |
| H  | -1.455799 | 3.108523  | -0.918867 |
| C  | -3.610547 | 2.920782  | -0.762911 |

|   |           |           |           |
|---|-----------|-----------|-----------|
| C | -3.767140 | 4.306680  | -0.593880 |
| C | -4.770755 | 2.131245  | -0.827212 |
| C | -5.030302 | 4.884204  | -0.492783 |
| H | -2.874424 | 4.936069  | -0.536330 |
| C | -6.034832 | 2.707211  | -0.726258 |
| H | -4.687555 | 1.049539  | -0.948506 |
| C | -6.173177 | 4.085931  | -0.557869 |
| H | -5.124186 | 5.964652  | -0.361026 |
| H | -6.922188 | 2.071671  | -0.776956 |
| H | -7.165254 | 4.535458  | -0.476786 |
| C | 4.533962  | 1.027491  | 2.999643  |
| H | 4.467995  | 0.595449  | 4.009440  |
| H | 5.493788  | 1.555522  | 2.913763  |
| H | 3.720519  | 1.762357  | 2.899665  |
| C | 6.237036  | -1.354289 | -1.132258 |
| H | 6.723794  | -0.399785 | -1.378257 |
| H | 7.023527  | -2.046318 | -0.790731 |
| H | 5.807727  | -1.772846 | -2.053599 |
| H | 3.881553  | -2.730594 | -0.829750 |
| H | 2.519260  | -0.785404 | 2.744091  |
| B | 0.612796  | 2.867147  | 0.997111  |
| O | 0.374932  | 4.033266  | 0.314384  |
| O | 1.953732  | 2.640419  | 1.177097  |
| C | 1.630829  | 4.494736  | -0.218545 |
| C | 2.668187  | 3.813990  | 0.748505  |
| C | 3.968791  | 3.386078  | 0.085668  |
| H | 3.794291  | 2.625528  | -0.684886 |
| H | 4.472118  | 4.250059  | -0.373164 |
| H | 4.646057  | 2.954794  | 0.835981  |
| C | 2.959132  | 4.652033  | 1.992611  |
| H | 2.029949  | 4.969363  | 2.487691  |
| H | 3.538655  | 4.049704  | 2.706212  |
| H | 3.546562  | 5.547146  | 1.743907  |
| C | 1.647194  | 6.014788  | -0.209723 |
| H | 0.899503  | 6.395890  | -0.920117 |
| H | 1.410685  | 6.418091  | 0.782946  |
| H | 2.633460  | 6.392380  | -0.517968 |
| C | 1.728335  | 3.973339  | -1.651894 |
| H | 2.627593  | 4.353906  | -2.156596 |
| H | 1.752615  | 2.874558  | -1.682727 |
| H | 0.847268  | 4.310553  | -2.216644 |

108

Figure\_S15-7\_AA-9d(Na)-ts(1,6minor)\_07 / electronic energy: -4131.83586301 a.u. / lowest freq: -394.32 cm<sup>-1</sup>

|    |           |           |           |
|----|-----------|-----------|-----------|
| C  | 3.849090  | -1.863501 | 1.902265  |
| H  | 4.454371  | -2.620380 | 1.389282  |
| C  | 4.420245  | -0.453928 | 1.730176  |
| H  | 4.695513  | 0.021125  | 2.682551  |
| C  | 2.273406  | -0.541608 | 0.796026  |
| C  | 3.413226  | 1.636784  | 0.764918  |
| C  | 4.664562  | 2.266255  | 0.782370  |
| C  | 2.282764  | 2.381789  | 0.417538  |
| C  | 4.791583  | 3.614352  | 0.432120  |
| C  | 2.391153  | 3.720591  | 0.042975  |
| C  | 3.650859  | 4.328024  | 0.054195  |
| H  | 3.744379  | 5.379723  | -0.230856 |
| Cu | 0.538022  | -0.195418 | -0.112190 |
| N  | 2.542940  | -1.756407 | 1.248634  |
| N  | 3.313211  | 0.271027  | 1.094740  |
| C  | -0.686484 | -0.028294 | -1.787324 |
| C  | 0.661257  | -0.330412 | -2.223808 |
| Na | 3.879519  | -1.726944 | -1.938699 |
| H  | 5.307366  | -0.449869 | 1.077965  |
| H  | 3.735130  | -2.151949 | 2.957630  |
| H  | -0.897860 | 1.046849  | -1.743501 |
| C  | 1.514314  | 0.839682  | -2.518843 |
| C  | 1.100775  | -1.650390 | -2.687892 |
| O  | 2.838628  | 0.569291  | -2.519022 |
| O  | 1.108438  | 1.970845  | -2.684495 |
| O  | 2.073207  | -1.863451 | -3.397797 |
| O  | 0.338469  | -2.662842 | -2.261890 |
| C  | 0.771650  | -3.974959 | -2.611468 |
| H  | 0.758730  | -4.110724 | -3.701926 |
| H  | 0.054729  | -4.657767 | -2.141453 |
| H  | 1.787982  | -4.133531 | -2.218967 |
| C  | 3.711421  | 1.651854  | -2.811309 |
| H  | 3.460863  | 2.106251  | -3.779704 |
| H  | 4.720055  | 1.223853  | -2.851774 |
| H  | 3.659689  | 2.419269  | -2.026827 |
| C  | 1.754022  | -2.928879 | 0.901336  |
| H  | 1.072901  | -2.600027 | 0.099525  |
| C  | 0.909392  | -3.447515 | 2.044765  |
| C  | 0.065961  | -4.546460 | 1.826274  |
| C  | 0.887762  | -2.839815 | 3.304444  |
| C  | -0.762474 | -5.027995 | 2.836573  |
| H  | 0.038924  | -5.018969 | 0.841825  |
| C  | 0.058203  | -3.319218 | 4.319446  |
| H  | 1.506244  | -1.960165 | 3.492729  |
| C  | -0.768723 | -4.416994 | 4.091326  |
| H  | -1.417040 | -5.879980 | 2.638908  |

|   |           |           |           |
|---|-----------|-----------|-----------|
| H | 0.054762  | -2.822832 | 5.292487  |
| H | -1.422941 | -4.789271 | 4.882668  |
| C | 2.699653  | -3.979252 | 0.233748  |
| H | 2.023095  | -4.814153 | -0.082470 |
| H | 3.299996  | -4.431966 | 1.071819  |
| O | 3.424334  | -3.443344 | -0.758126 |
| C | -0.620723 | 0.198068  | 1.586308  |
| H | -0.054859 | 1.052872  | 1.976750  |
| H | -0.356172 | -0.752207 | 2.067699  |
| C | -1.989928 | 0.425094  | 1.304945  |
| C | -2.875326 | -0.620609 | 1.036749  |
| H | -3.941109 | -0.386042 | 1.061968  |
| C | -2.477074 | -2.050999 | 1.226836  |
| H | -1.551571 | -2.276500 | 0.668838  |
| H | -2.254688 | -2.273679 | 2.285658  |
| H | -3.260827 | -2.744617 | 0.891003  |
| C | -1.799293 | -0.885380 | -1.677495 |
| H | -1.652834 | -1.944797 | -1.876569 |
| C | -3.031450 | -0.439274 | -1.218943 |
| H | -3.183767 | 0.639328  | -1.147084 |
| C | -4.288946 | -1.201474 | -1.370037 |
| C | -5.510788 | -0.539961 | -1.159245 |
| C | -4.326733 | -2.564314 | -1.705543 |
| C | -6.724565 | -1.210016 | -1.285265 |
| H | -5.493490 | 0.515851  | -0.874957 |
| C | -5.541145 | -3.236559 | -1.828912 |
| H | -3.397023 | -3.111052 | -1.873971 |
| C | -6.746307 | -2.564595 | -1.621561 |
| H | -7.660996 | -0.672891 | -1.117419 |
| H | -5.545366 | -4.297431 | -2.090429 |
| H | -7.696969 | -3.092906 | -1.721443 |
| C | 1.159813  | 4.458817  | -0.399582 |
| H | 0.280869  | 4.121532  | 0.165889  |
| H | 1.267396  | 5.545972  | -0.279312 |
| H | 0.964921  | 4.240459  | -1.461412 |
| C | 6.137423  | 4.289560  | 0.488830  |
| H | 6.225619  | 5.071094  | -0.279050 |
| H | 6.287284  | 4.772674  | 1.467865  |
| H | 6.956454  | 3.570360  | 0.347261  |
| H | 5.561110  | 1.713224  | 1.064890  |
| H | 1.294803  | 1.922615  | 0.431670  |
| B | -2.557500 | 1.868070  | 1.140753  |
| O | -3.878106 | 2.102462  | 0.846163  |
| O | -1.838931 | 3.033463  | 1.242040  |
| C | -4.018373 | 3.494675  | 0.519685  |
| C | -2.784608 | 4.125125  | 1.257921  |
| C | -2.192096 | 5.340127  | 0.563772  |
| H | -1.832972 | 5.101779  | -0.444966 |
| H | -2.948723 | 6.135389  | 0.487299  |
| H | -1.345643 | 5.731325  | 1.145757  |
| C | -3.067844 | 4.445413  | 2.725420  |
| H | -3.527278 | 3.589245  | 3.240737  |
| H | -2.118014 | 4.677030  | 3.227859  |
| H | -3.734598 | 5.313310  | 2.825964  |
| C | -5.371859 | 3.989390  | 1.003759  |
| H | -6.172517 | 3.495495  | 0.434417  |
| H | -5.526410 | 3.770255  | 2.067686  |
| H | -5.464325 | 5.074756  | 0.849724  |
| C | -3.923901 | 3.610421  | -1.001989 |
| H | -4.088899 | 4.642805  | -1.340790 |
| H | -2.942628 | 3.275042  | -1.369785 |
| H | -4.694266 | 2.971922  | -1.457870 |

76

Figure\_S15-8\_9b(Na)-Cu-allyl\_01 / electronic energy: -3289.86902565 a.u. / lowest freq: 17.54 cm-1

|    |           |           |           |
|----|-----------|-----------|-----------|
| C  | -2.892697 | 1.596089  | 1.460941  |
| H  | -2.743197 | 1.250407  | 2.497136  |
| C  | -1.975473 | 2.766074  | 1.108473  |
| H  | -2.463374 | 3.496160  | 0.440338  |
| C  | -1.249374 | 0.839069  | 0.001489  |
| C  | 0.301145  | 2.736026  | -0.016190 |
| C  | 1.264409  | 3.038492  | 0.964267  |
| C  | 0.499150  | 3.065316  | -1.370203 |
| C  | 2.449274  | 3.661177  | 0.561084  |
| C  | 1.705816  | 3.672713  | -1.732198 |
| C  | 2.674483  | 3.968356  | -0.777657 |
| H  | 3.610370  | 4.443824  | -1.078925 |
| Cu | -0.251244 | -0.335231 | -1.174432 |
| N  | -2.441060 | 0.564339  | 0.526560  |
| N  | -0.895934 | 2.082234  | 0.388527  |
| H  | -1.606803 | 3.302977  | 1.991271  |
| H  | -3.958000 | 1.822171  | 1.319187  |
| C  | -3.044007 | -0.760576 | 0.519412  |
| H  | -2.554189 | -1.289301 | -0.315468 |
| C  | -4.525217 | -0.639770 | 0.199869  |
| C  | -5.531197 | -1.041691 | 1.083724  |
| C  | -4.902867 | -0.081480 | -1.029569 |
| C  | -6.878729 | -0.890279 | 0.747507  |
| H  | -5.271410 | -1.477151 | 2.049741  |
| C  | -6.244395 | 0.073098  | -1.368072 |

|    |           |           |           |
|----|-----------|-----------|-----------|
| H  | -4.124350 | 0.241321  | -1.727003 |
| C  | -7.240224 | -0.331892 | -0.476378 |
| H  | -7.649523 | -1.209649 | 1.452726  |
| H  | -6.515806 | 0.510614  | -2.331627 |
| H  | -8.294305 | -0.210547 | -0.735919 |
| C  | -2.663657 | -1.551289 | 1.799213  |
| H  | -3.213957 | -2.525298 | 1.696342  |
| H  | -3.180113 | -1.041428 | 2.659897  |
| O  | -1.336986 | -1.673655 | 1.957204  |
| C  | 0.761487  | -1.541323 | -2.354457 |
| H  | 1.475351  | -0.912042 | -2.911363 |
| H  | 0.108200  | -2.075043 | -3.064880 |
| C  | 1.441426  | -2.424103 | -1.385089 |
| C  | 0.988711  | -3.644270 | -0.986354 |
| H  | 1.556486  | -4.204231 | -0.232322 |
| C  | -0.265528 | -4.273060 | -1.519961 |
| H  | -0.471331 | -5.246949 | -1.053546 |
| H  | -1.139388 | -3.618105 | -1.339556 |
| H  | -0.221274 | -4.425144 | -2.613314 |
| B  | 2.674857  | -1.814147 | -0.650999 |
| O  | 3.578781  | -0.949566 | -1.188422 |
| O  | 2.893022  | -2.014555 | 0.702220  |
| C  | 4.592362  | -0.671470 | -0.204792 |
| C  | 3.868051  | -1.044195 | 1.142553  |
| C  | 4.996463  | 0.790230  | -0.319960 |
| C  | 5.781401  | -1.578686 | -0.516488 |
| C  | 4.764620  | -1.674238 | 2.195354  |
| C  | 3.081412  | 0.121336  | 1.736282  |
| H  | 5.219611  | -2.605750 | 1.836445  |
| H  | 4.178808  | -1.903760 | 3.097250  |
| H  | 5.566555  | -0.977538 | 2.480470  |
| H  | 5.509876  | -2.641027 | -0.432057 |
| H  | 6.626269  | -1.378286 | 0.157165  |
| H  | 6.109124  | -1.392230 | -1.548824 |
| H  | 2.392039  | 0.553077  | 0.995092  |
| H  | 3.746843  | 0.918937  | 2.094387  |
| H  | 2.489884  | -0.230057 | 2.595248  |
| H  | 4.125398  | 1.455965  | -0.267177 |
| H  | 5.494789  | 0.958336  | -1.285293 |
| H  | 5.701406  | 1.061643  | 0.480029  |
| Na | 0.603802  | -2.265300 | 1.509716  |
| H  | 1.879983  | 3.924594  | -2.781112 |
| H  | 3.211577  | 3.891914  | 1.309483  |
| C  | -0.547128 | 2.775810  | -2.413076 |
| H  | -0.507148 | 1.718738  | -2.725077 |
| H  | -1.561952 | 2.956715  | -2.031076 |
| H  | -0.390961 | 3.397087  | -3.304993 |
| C  | 1.037472  | 2.696278  | 2.412516  |
| H  | 0.431839  | 3.466996  | 2.916158  |
| H  | 0.508160  | 1.738685  | 2.519469  |
| H  | 1.991775  | 2.629837  | 2.951304  |

108

Figure\_S15-8\_AA-9b(Na)-ts(1,6major)\_01 / electronic energy: -4131.83854441 a.u. / lowest freq: -314.01 cm<sup>-1</sup>

|    |           |           |           |
|----|-----------|-----------|-----------|
| C  | 4.409202  | -0.678859 | -1.598345 |
| H  | 5.207548  | -1.054404 | -0.941860 |
| C  | 3.706139  | -1.798193 | -2.378042 |
| H  | 3.596282  | -1.568039 | -3.449415 |
| C  | 2.223515  | -0.871689 | -0.812396 |
| C  | 1.434987  | -2.867925 | -1.971666 |
| C  | 1.347184  | -3.924553 | -1.046921 |
| C  | 0.621524  | -2.813495 | -3.113970 |
| C  | 0.355907  | -4.889661 | -1.235793 |
| C  | -0.350795 | -3.807478 | -3.275246 |
| C  | -0.497135 | -4.823552 | -2.336606 |
| H  | -1.271345 | -5.582115 | -2.471515 |
| Cu | 0.496181  | -0.459771 | 0.096214  |
| N  | 3.333055  | -0.149647 | -0.757910 |
| N  | 2.394188  | -1.846363 | -1.725962 |
| C  | -0.926695 | -0.354216 | 1.585449  |
| C  | 0.319930  | -0.747922 | 2.224491  |
| Na | 3.736675  | -1.410196 | 3.015045  |
| H  | 4.220373  | -2.766437 | -2.290448 |
| H  | 4.816547  | 0.103718  | -2.254261 |
| H  | -1.153101 | 0.711394  | 1.678048  |
| C  | 0.654958  | -2.121833 | 2.619202  |
| C  | 1.157029  | 0.309056  | 2.806858  |
| O  | -0.321657 | -3.003783 | 2.381993  |
| O  | 1.707722  | -2.496944 | 3.115524  |
| O  | 2.109282  | 0.160055  | 3.554073  |
| O  | 0.792913  | 1.550462  | 2.428543  |
| C  | 1.585552  | 2.615027  | 2.935263  |
| H  | 1.531681  | 2.656479  | 4.031831  |
| H  | 1.173512  | 3.531428  | 2.503325  |
| H  | 2.636148  | 2.498108  | 2.632803  |
| C  | -0.108171 | -4.346218 | 2.785163  |
| H  | 0.789218  | -4.765425 | 2.313326  |
| H  | -0.996803 | -4.901057 | 2.464708  |
| H  | 0.002286  | -4.412473 | 3.876704  |
| C  | 3.554110  | 0.965420  | 0.156830  |

|   |           |           |           |
|---|-----------|-----------|-----------|
| H | 2.742115  | 0.886894  | 0.890514  |
| C | 3.402118  | 2.292883  | -0.561064 |
| C | 4.453546  | 2.886630  | -1.271342 |
| C | 2.157175  | 2.936280  | -0.558273 |
| C | 4.263440  | 4.086288  | -1.959333 |
| H | 5.436350  | 2.411024  | -1.288785 |
| C | 1.958755  | 4.123771  | -1.259006 |
| H | 1.320349  | 2.493633  | -0.010863 |
| C | 3.014766  | 4.706662  | -1.960045 |
| H | 5.098247  | 4.535450  | -2.502571 |
| H | 0.965982  | 4.575798  | -1.265411 |
| H | 2.863814  | 5.640228  | -2.506772 |
| C | 4.874971  | 0.758450  | 0.946498  |
| H | 4.925505  | 1.656483  | 1.624995  |
| H | 5.716095  | 0.938007  | 0.219524  |
| O | 4.930325  | -0.433057 | 1.556033  |
| C | -0.446441 | 0.476821  | -1.530405 |
| H | -0.272218 | -0.355557 | -2.218822 |
| H | 0.296764  | 1.278015  | -1.622207 |
| C | -1.792693 | 0.871003  | -1.322151 |
| C | -2.848236 | -0.018189 | -1.484198 |
| H | -3.861083 | 0.390666  | -1.460661 |
| C | -2.658429 | -1.367670 | -2.105762 |
| H | -2.287646 | -1.280162 | -3.142345 |
| H | -1.900389 | -1.953703 | -1.557194 |
| H | -3.591840 | -1.945689 | -2.128204 |
| C | -2.009583 | -1.159127 | 1.163043  |
| H | -1.875852 | -2.237122 | 1.121905  |
| C | -3.208743 | -0.599180 | 0.759351  |
| H | -3.373906 | 0.460289  | 0.963227  |
| C | -4.441509 | -1.376310 | 0.533011  |
| C | -5.667315 | -0.694506 | 0.451684  |
| C | -4.454014 | -2.773184 | 0.382699  |
| C | -6.860582 | -1.377878 | 0.232453  |
| H | -5.673321 | 0.393835  | 0.558437  |
| C | -5.646781 | -3.457753 | 0.162519  |
| H | -3.519068 | -3.335233 | 0.426778  |
| C | -6.856599 | -2.765797 | 0.086217  |
| H | -7.800575 | -0.824145 | 0.174457  |
| H | -5.630839 | -4.544012 | 0.046024  |
| H | -7.790818 | -3.304488 | -0.086565 |
| B | -2.128721 | 2.290733  | -0.774518 |
| O | -3.293047 | 2.563854  | -0.101912 |
| O | -1.330156 | 3.398645  | -0.892786 |
| C | -3.397117 | 3.988156  | 0.060249  |
| C | -1.898486 | 4.448267  | -0.084685 |
| C | -1.720120 | 5.784224  | -0.790331 |
| H | -2.097458 | 5.750960  | -1.819982 |
| H | -2.250998 | 6.579176  | -0.245895 |
| H | -0.655135 | 6.054910  | -0.824320 |
| C | -1.135774 | 4.445992  | 1.237735  |
| H | -1.227012 | 3.476967  | 1.750165  |
| H | -0.070979 | 4.621263  | 1.026726  |
| H | -1.486740 | 5.238808  | 1.912808  |
| C | -4.025296 | 4.286900  | 1.412530  |
| H | -5.066480 | 3.933666  | 1.423106  |
| H | -3.487559 | 3.785641  | 2.227322  |
| H | -4.030070 | 5.369807  | 1.606196  |
| C | -4.295604 | 4.500327  | -1.065041 |
| H | -4.477524 | 5.580422  | -0.976214 |
| H | -3.855182 | 4.298549  | -2.052234 |
| H | -5.263025 | 3.981206  | -1.010802 |
| H | 0.262632  | -5.709887 | -0.519615 |
| H | -1.010160 | -3.771735 | -4.146018 |
| C | 0.800958  | -1.744126 | -4.158673 |
| H | -0.153909 | -1.505369 | -4.646711 |
| H | 1.213103  | -0.819367 | -3.733760 |
| H | 1.495772  | -2.086658 | -4.942798 |
| C | 2.334580  | -4.022077 | 0.084239  |
| H | 3.366807  | -3.937008 | -0.287161 |
| H | 2.203278  | -3.220744 | 0.824604  |
| H | 2.242445  | -4.986516 | 0.600994  |

108

Figure\_S15-8\_AA-9b(Na)-ts(1,6major)\_02 / electronic energy: -4131.83936333 a.u. / lowest freq: -320.04 cm<sup>-1</sup>

|    |           |          |           |
|----|-----------|----------|-----------|
| C  | -4.384148 | 0.925591 | -1.426463 |
| H  | -5.108023 | 1.069669 | -0.610092 |
| C  | -3.723185 | 2.233133 | -1.872185 |
| H  | -3.580764 | 2.284311 | -2.964276 |
| C  | -2.178475 | 0.932736 | -0.691215 |
| C  | -1.488250 | 3.224923 | -1.138929 |
| C  | -1.507010 | 4.063837 | -0.012248 |
| C  | -0.580067 | 3.413197 | -2.192179 |
| C  | -0.531790 | 5.060340 | 0.085064  |
| C  | 0.381971  | 4.419966 | -2.058296 |
| C  | 0.415741  | 5.226155 | -0.923327 |
| H  | 1.179577  | 6.001523 | -0.830625 |
| Cu | -0.488478 | 0.280449 | 0.088387  |
| N  | -3.246410 | 0.170679 | -0.891501 |
| N  | -2.425097 | 2.154434 | -1.194757 |



|    |           |           |           |
|----|-----------|-----------|-----------|
| C  | 0.986602  | 0.077809  | 1.482336  |
| C  | -0.232197 | 0.254016  | 2.250858  |
| Na | -3.645517 | 0.486967  | 3.101499  |
| H  | -4.282241 | 3.126098  | -1.559682 |
| H  | -4.870152 | 0.388377  | -2.252582 |
| H  | 1.368544  | -0.944572 | 1.459585  |
| C  | -0.619621 | 1.492944  | 2.925277  |
| C  | -0.997431 | -0.950546 | 2.590790  |
| O  | 0.335489  | 2.428736  | 2.915233  |
| O  | -1.694550 | 1.709722  | 3.469453  |
| O  | -1.914254 | -1.049593 | 3.391276  |
| O  | -0.599942 | -2.014087 | 1.873643  |
| C  | -1.302385 | -3.229710 | 2.045038  |
| H  | -1.131286 | -3.648768 | 3.047771  |
| H  | -0.909280 | -3.905389 | 1.277707  |
| H  | -2.383103 | -3.079405 | 1.906909  |
| C  | 0.066009  | 3.651297  | 3.578966  |
| H  | -0.845745 | 4.121740  | 3.190054  |
| H  | 0.931478  | 4.295430  | 3.388761  |
| H  | -0.052258 | 3.490477  | 4.659992  |
| C  | -3.401398 | -1.170475 | -0.359447 |
| H  | -2.555276 | -1.313897 | 0.330489  |
| C  | -3.308769 | -2.231950 | -1.439127 |
| C  | -3.463364 | -3.585466 | -1.104590 |
| C  | -3.034238 | -1.912767 | -2.774279 |
| C  | -3.359120 | -4.582118 | -2.072839 |
| H  | -3.657369 | -3.868008 | -0.067919 |
| C  | -2.930650 | -2.907652 | -3.746645 |
| H  | -2.877473 | -0.869739 | -3.055996 |
| C  | -3.095797 | -4.247774 | -3.401616 |
| H  | -3.481879 | -5.629127 | -1.786052 |
| H  | -2.713485 | -2.631750 | -4.781221 |
| H  | -3.012994 | -5.028038 | -4.161364 |
| C  | -4.694678 | -1.225811 | 0.519359  |
| H  | -4.710757 | -2.263346 | 0.946169  |
| H  | -5.551446 | -1.231701 | -0.214261 |
| O  | -4.740740 | -0.244423 | 1.428533  |
| C  | 0.315133  | -0.932404 | -1.449531 |
| H  | -0.046179 | -0.309802 | -2.275792 |
| H  | -0.343641 | -1.780470 | -1.219559 |
| C  | 1.709748  | -1.141648 | -1.339026 |
| C  | 2.633925  | -0.185590 | -1.748966 |
| H  | 3.688203  | -0.472378 | -1.764331 |
| C  | 2.230359  | 1.021418  | -2.532678 |
| H  | 1.764187  | 0.735236  | -3.491402 |
| H  | 1.476749  | 1.604232  | -1.975008 |
| H  | 3.081199  | 1.680174  | -2.750138 |
| C  | 1.822632  | 1.076569  | 0.937628  |
| H  | 1.468837  | 2.108618  | 0.940506  |
| C  | 3.057790  | 0.781400  | 0.372489  |
| H  | 3.521146  | -0.175325 | 0.620927  |
| C  | 3.991422  | 1.819142  | -0.095976 |
| C  | 5.339170  | 1.489158  | -0.314346 |
| C  | 3.582809  | 3.135667  | -0.369695 |
| C  | 6.246544  | 2.436268  | -0.782695 |
| H  | 5.673791  | 0.466725  | -0.117319 |
| C  | 4.489096  | 4.083085  | -0.837337 |
| H  | 2.537808  | 3.423095  | -0.238669 |
| C  | 5.826198  | 3.740753  | -1.046968 |
| H  | 7.289764  | 2.154778  | -0.943738 |
| H  | 4.144688  | 5.099104  | -1.045456 |
| H  | 6.535721  | 4.484857  | -1.415418 |
| B  | 2.275611  | -2.383120 | -0.584036 |
| O  | 3.621868  | -2.630103 | -0.470256 |
| O  | 1.522744  | -3.323613 | 0.066469  |
| C  | 3.780640  | -3.941632 | 0.101637  |
| C  | 2.416221  | -4.129006 | 0.858536  |
| C  | 1.898713  | -5.557804 | 0.898657  |
| H  | 1.708992  | -5.947496 | -0.109267 |
| H  | 2.623155  | -6.215782 | 1.401132  |
| H  | 0.956331  | -5.597090 | 1.463812  |
| C  | 2.442919  | -3.537480 | 2.267581  |
| H  | 2.853706  | -2.517298 | 2.266487  |
| H  | 1.418831  | -3.485972 | 2.658697  |
| H  | 3.048823  | -4.153390 | 2.946848  |
| C  | 5.014014  | -3.951862 | 0.990841  |
| H  | 5.915371  | -3.816628 | 0.376004  |
| H  | 4.985926  | -3.145906 | 1.734663  |
| H  | 5.101762  | -4.914112 | 1.516863  |
| C  | 3.957281  | -4.923359 | -1.056361 |
| H  | 4.145791  | -5.943091 | -0.692144 |
| H  | 3.069000  | -4.941992 | -1.704771 |
| H  | 4.816967  | -4.608007 | -1.664760 |
| H  | -0.520748 | 5.718046  | 0.957693  |
| H  | 1.117136  | 4.566155  | -2.853417 |
| C  | -0.664418 | 2.577157  | -3.440213 |
| H  | -0.825516 | 1.515259  | -3.206767 |
| H  | -1.507537 | 2.905090  | -4.069131 |
| H  | 0.250747  | 2.666566  | -4.038828 |

|   |           |          |          |
|---|-----------|----------|----------|
| C | -2.572361 | 3.894942 | 1.036473 |
| H | -3.575605 | 3.900857 | 0.585415 |
| H | -2.468517 | 2.941904 | 1.573819 |
| H | -2.532339 | 4.708508 | 1.773039 |

108

Figure\_S15-8\_AA-9b(Na)-ts(1,6major)\_03 / electronic energy: -4131.83794438 a.u. / lowest freq: -314.88 cm-1

|    |           |           |           |
|----|-----------|-----------|-----------|
| C  | -4.215782 | 1.137409  | -1.426545 |
| H  | -4.915974 | 1.603441  | -0.718041 |
| C  | -3.478640 | 2.164664  | -2.291629 |
| H  | -3.411792 | 1.862586  | -3.349211 |
| C  | -1.985381 | 1.208665  | -0.755272 |
| C  | -1.131206 | 3.104594  | -2.037974 |
| C  | -0.927958 | 4.215150  | -1.200030 |
| C  | -0.376973 | 2.907354  | -3.205752 |
| C  | 0.115757  | 5.092113  | -1.504209 |
| C  | 0.658966  | 3.808780  | -3.476429 |
| C  | 0.914699  | 4.880542  | -2.626701 |
| H  | 1.731626  | 5.569891  | -2.851051 |
| Cu | -0.267319 | 0.642284  | 0.091222  |
| N  | -3.125947 | 0.538347  | -0.650770 |
| N  | -2.146828 | 2.175121  | -1.677698 |
| C  | 1.124730  | 0.241412  | 1.570578  |
| C  | -0.009550 | 0.901729  | 2.201732  |
| Na | -3.211863 | 2.208457  | 3.032440  |
| H  | -3.935864 | 3.163657  | -2.252185 |
| H  | -4.743817 | 0.376225  | -2.018294 |
| H  | 1.075100  | -0.849088 | 1.633638  |
| C  | -0.097683 | 2.346060  | 2.433837  |
| C  | -0.978071 | 0.061546  | 2.921102  |
| O  | 0.938319  | 3.027670  | 1.925519  |
| O  | -1.005287 | 2.942372  | 2.996442  |
| O  | -1.862527 | 0.441835  | 3.669111  |
| O  | -0.820319 | -1.254662 | 2.687799  |
| C  | -1.737407 | -2.122706 | 3.335139  |
| H  | -1.662396 | -2.027021 | 4.426949  |
| H  | -1.468367 | -3.137616 | 3.025413  |
| H  | -2.769036 | -1.898054 | 3.028666  |
| C  | 0.992456  | 4.424151  | 2.164818  |
| H  | 0.086141  | 4.925998  | 1.805373  |
| H  | 1.867212  | 4.790042  | 1.616122  |
| H  | 1.110821  | 4.628375  | 3.238486  |
| C  | -3.394206 | -0.497998 | 0.326725  |
| H  | -2.501791 | -0.528421 | 0.969431  |
| C  | -3.541656 | -1.864705 | -0.322361 |
| C  | -4.093289 | -2.940744 | 0.388995  |
| C  | -3.094853 | -2.103150 | -1.627883 |
| C  | -4.194172 | -4.206788 | -0.185829 |
| H  | -4.447650 | -2.793857 | 1.410526  |
| C  | -3.192053 | -3.368329 | -2.205472 |
| H  | -2.653637 | -1.285953 | -2.201690 |
| C  | -3.743972 | -4.427529 | -1.487412 |
| H  | -4.627163 | -5.027868 | 0.390181  |
| H  | -2.823993 | -3.526610 | -3.221631 |
| H  | -3.821825 | -5.419443 | -1.938140 |
| C  | -4.597090 | -0.053288 | 1.227531  |
| H  | -4.638796 | -0.816503 | 2.050029  |
| H  | -5.521085 | -0.274332 | 0.618503  |
| O  | -4.493017 | 1.212152  | 1.648893  |
| C  | 0.547448  | -0.220345 | -1.624098 |
| H  | 0.603702  | 0.722744  | -2.177086 |
| H  | -0.345639 | -0.815649 | -1.849100 |
| C  | 1.750116  | -0.950159 | -1.444453 |
| C  | 2.998588  | -0.344875 | -1.479786 |
| H  | 3.877541  | -0.994342 | -1.492876 |
| C  | 3.175405  | 1.069957  | -1.944696 |
| H  | 2.869611  | 1.187134  | -2.999443 |
| H  | 2.542400  | 1.758422  | -1.357368 |
| H  | 4.218489  | 1.402331  | -1.855663 |
| C  | 2.404832  | 0.739943  | 1.239259  |
| H  | 2.579980  | 1.811962  | 1.281019  |
| C  | 3.409029  | -0.111510 | 0.814814  |
| H  | 3.243944  | -1.185891 | 0.918488  |
| C  | 4.826289  | 0.281060  | 0.698703  |
| C  | 5.800182  | -0.722953 | 0.565747  |
| C  | 5.257046  | 1.618233  | 0.709859  |
| C  | 7.151631  | -0.407489 | 0.450241  |
| H  | 5.480581  | -1.768747 | 0.547803  |
| C  | 6.608303  | 1.935278  | 0.593236  |
| H  | 4.527782  | 2.425014  | 0.804602  |
| C  | 7.563432  | 0.925926  | 0.462846  |
| H  | 7.889091  | -1.207253 | 0.349700  |
| H  | 6.918783  | 2.982832  | 0.603845  |
| H  | 8.622401  | 1.176683  | 0.370481  |
| B  | 1.611398  | -2.446929 | -1.037862 |
| O  | 2.507429  | -3.117139 | -0.244850 |
| O  | 0.531803  | -3.219028 | -1.370913 |
| C  | 2.079657  | -4.490583 | -0.155087 |
| C  | 0.554787  | -4.385944 | -0.529953 |
| C  | 0.004333  | -5.575673 | -1.298770 |

|   |           |           |           |
|---|-----------|-----------|-----------|
| H | 0.520665  | -5.714206 | -2.257194 |
| H | 0.106993  | -6.497585 | -0.706964 |
| H | -1.063684 | -5.415330 | -1.502312 |
| C | -0.336522 | -4.069980 | 0.669084  |
| H | 0.046131  | -3.201385 | 1.224618  |
| H | -1.344127 | -3.819848 | 0.306969  |
| H | -0.414067 | -4.925500 | 1.355363  |
| C | 2.351685  | -5.000661 | 1.251230  |
| H | 3.435926  | -5.061747 | 1.423523  |
| H | 1.922413  | -4.333682 | 2.009699  |
| H | 1.927261  | -6.006793 | 1.385527  |
| C | 2.894518  | -5.282785 | -1.175692 |
| H | 2.672912  | -6.357851 | -1.119827 |
| H | 2.697448  | -4.936613 | -2.200722 |
| H | 3.964300  | -5.138631 | -0.967207 |
| H | 0.296767  | 5.955866  | -0.859565 |
| H | 1.272269  | 3.661634  | -4.368835 |
| C | -0.685138 | 1.789849  | -4.167066 |
| H | 0.224674  | 1.449078  | -4.680034 |
| H | -1.137777 | 0.926328  | -3.662755 |
| H | -1.392016 | 2.134011  | -4.939602 |
| C | -1.846161 | 4.454140  | -0.032417 |
| H | -2.900598 | 4.398902  | -0.341351 |
| H | -1.710861 | 3.700445  | 0.756072  |
| H | -1.673816 | 5.445531  | 0.407669  |

108

Figure\_S15-8\_AA-9b(Na)-ts(1,6major)\_04 / electronic energy: -4131.83111422 a.u. / lowest freq: -361.44 cm-1

|    |           |           |           |
|----|-----------|-----------|-----------|
| C  | -2.812256 | -2.862913 | -1.601564 |
| H  | -3.386190 | -3.384493 | -0.818721 |
| C  | -3.600262 | -1.714600 | -2.210705 |
| H  | -3.340128 | -1.538403 | -3.268215 |
| C  | -1.964566 | -0.856600 | -0.788731 |
| C  | -3.904743 | 0.615220  | -1.326485 |
| C  | -5.159194 | 0.541330  | -0.688140 |
| C  | -3.468809 | 1.804400  | -1.937829 |
| C  | -5.990384 | 1.664566  | -0.714307 |
| C  | -4.319355 | 2.914485  | -1.914504 |
| C  | -5.577793 | 2.843871  | -1.324915 |
| H  | -6.235274 | 3.715828  | -1.332491 |
| Cu | -0.519816 | 0.289930  | -0.028449 |
| N  | -1.691407 | -2.152771 | -0.982388 |
| N  | -3.133234 | -0.579787 | -1.401529 |
| C  | 0.531581  | 1.442528  | 1.339129  |
| C  | -0.756815 | 1.107935  | 1.909669  |
| Na | -3.434057 | -0.926297 | 2.404115  |
| H  | -4.686259 | -1.849942 | -2.145083 |
| H  | -2.469360 | -3.595489 | -2.343390 |
| H  | 1.343765  | 0.779918  | 1.653159  |
| C  | -1.903670 | 2.008736  | 1.733146  |
| C  | -0.815054 | 0.028448  | 2.903912  |
| O  | -3.092035 | 1.487187  | 2.121862  |
| O  | -1.859378 | 3.115374  | 1.234189  |
| O  | -1.708073 | -0.146512 | 3.718497  |
| O  | 0.239971  | -0.796850 | 2.871763  |
| C  | 0.166537  | -1.918180 | 3.743975  |
| H  | 0.134318  | -1.597106 | 4.794374  |
| H  | 1.072126  | -2.504602 | 3.559550  |
| H  | -0.731981 | -2.504086 | 3.504825  |
| C  | -4.204206 | 2.369089  | 2.076909  |
| H  | -4.101314 | 3.154759  | 2.839565  |
| H  | -5.089044 | 1.758625  | 2.291282  |
| H  | -4.299880 | 2.832337  | 1.088239  |
| C  | -0.779399 | -2.881435 | -0.116208 |
| H  | -0.106128 | -2.123593 | 0.321819  |
| C  | 0.068240  | -3.871424 | -0.893459 |
| C  | 0.627827  | -4.994929 | -0.269568 |
| C  | 0.350274  | -3.667175 | -2.250177 |
| C  | 1.449337  | -5.874454 | -0.975113 |
| H  | 0.429641  | -5.189612 | 0.785557  |
| C  | 1.172180  | -4.541570 | -2.957914 |
| H  | -0.078842 | -2.801574 | -2.758962 |
| C  | 1.728897  | -5.650643 | -2.322429 |
| H  | 1.875188  | -6.741329 | -0.464460 |
| H  | 1.379359  | -4.353034 | -4.013801 |
| H  | 2.374808  | -6.336782 | -2.874568 |
| C  | -1.592754 | -3.480662 | 1.081208  |
| H  | -0.812969 | -3.858305 | 1.792004  |
| H  | -2.075469 | -4.418737 | 0.689284  |
| O  | -2.441531 | -2.598102 | 1.622764  |
| C  | 0.838004  | 0.006940  | -1.623552 |
| H  | 0.243561  | 0.476258  | -2.415896 |
| H  | 0.746749  | -1.082852 | -1.597323 |
| C  | 2.139396  | 0.508596  | -1.374670 |
| C  | 2.532100  | 1.806527  | -1.680858 |
| H  | 3.597824  | 2.036458  | -1.600838 |
| C  | 1.701801  | 2.697048  | -2.557621 |
| H  | 1.526047  | 2.236090  | -3.545525 |
| H  | 0.710207  | 2.874253  | -2.107822 |
| H  | 2.178604  | 3.673196  | -2.717433 |

|   |           |           |           |
|---|-----------|-----------|-----------|
| C | 0.947389  | 2.640020  | 0.717709  |
| H | 0.195643  | 3.394353  | 0.491956  |
| C | 2.276640  | 2.831674  | 0.371540  |
| H | 3.007603  | 2.125342  | 0.771580  |
| C | 2.838955  | 4.140184  | -0.015983 |
| C | 4.233989  | 4.305954  | -0.027413 |
| C | 2.043351  | 5.237276  | -0.385168 |
| C | 4.814499  | 5.517536  | -0.393712 |
| H | 4.869312  | 3.461159  | 0.253655  |
| C | 2.622396  | 6.449590  | -0.752687 |
| H | 0.955851  | 5.143045  | -0.393621 |
| C | 4.010267  | 6.597715  | -0.760027 |
| H | 5.902223  | 5.620351  | -0.392983 |
| H | 1.981941  | 7.287751  | -1.037540 |
| H | 4.462242  | 7.549313  | -1.048198 |
| B | 3.106974  | -0.427711 | -0.593263 |
| O | 4.087363  | 0.006523  | 0.261306  |
| O | 3.033715  | -1.792266 | -0.653491 |
| C | 4.852327  | -1.141975 | 0.678083  |
| C | 3.850697  | -2.325368 | 0.401570  |
| C | 4.496544  | -3.616258 | -0.074285 |
| H | 5.050626  | -3.469900 | -1.010207 |
| H | 5.186568  | -4.008404 | 0.687845  |
| H | 3.714917  | -4.367665 | -0.256975 |
| C | 2.914336  | -2.599918 | 1.575323  |
| H | 2.424792  | -1.674612 | 1.911360  |
| H | 2.130270  | -3.294000 | 1.240772  |
| H | 3.442845  | -3.053583 | 2.425833  |
| C | 5.242722  | -0.970185 | 2.137772  |
| H | 5.948247  | -0.132900 | 2.238563  |
| H | 4.368060  | -0.757047 | 2.765461  |
| H | 5.734818  | -1.878788 | 2.515423  |
| C | 6.099749  | -1.191778 | -0.202265 |
| H | 6.771982  | -2.007723 | 0.098561  |
| H | 5.837743  | -1.326633 | -1.261712 |
| H | 6.642519  | -0.240868 | -0.103223 |
| H | -3.989737 | 3.843002  | -2.386474 |
| H | -6.967530 | 1.614127  | -0.227458 |
| C | -2.124228 | 1.901221  | -2.597862 |
| H | -1.341038 | 2.081962  | -1.844538 |
| H | -1.861797 | 0.972085  | -3.122749 |
| H | -2.094778 | 2.732493  | -3.314422 |
| C | -5.624194 | -0.706924 | 0.017295  |
| H | -6.344782 | -1.271916 | -0.595133 |
| H | -4.794143 | -1.388984 | 0.249380  |
| H | -6.141202 | -0.448189 | 0.953524  |

108

Figure\_S15-8\_AA-9b(Na)-ts(1,6minor)\_01 / electronic energy: -4131.83618193 a.u. / lowest freq: -326.46 cm<sup>-1</sup>

|    |           |           |           |
|----|-----------|-----------|-----------|
| C  | -1.872866 | -2.485834 | 1.943345  |
| H  | -3.682318 | -1.248251 | 1.557371  |
| C  | -2.590814 | -1.244543 | 1.504419  |
| H  | -2.504522 | -3.379663 | 1.847701  |
| H  | -7.139356 | -3.354432 | -0.162828 |
| H  | -5.508330 | -1.500600 | -0.404607 |
| C  | -6.080164 | -3.578616 | -0.308969 |
| C  | -5.165290 | -2.538189 | -0.448183 |
| H  | -6.360964 | -5.722656 | -0.246685 |
| C  | -5.645900 | -4.904180 | -0.354799 |
| C  | -3.796232 | -2.791738 | -0.637635 |
| C  | -4.289133 | -5.172954 | -0.541623 |
| C  | -2.874373 | -1.647983 | -0.777482 |
| H  | -3.370248 | -0.678964 | -0.860874 |
| C  | -3.374907 | -4.131158 | -0.680865 |
| H  | -3.937195 | -6.206648 | -0.579779 |
| H  | -2.318287 | -4.366154 | -0.822215 |
| C  | -1.578968 | -1.753302 | -1.251353 |
| H  | -1.096330 | -2.726140 | -1.299673 |
| C  | -1.952603 | -0.012615 | 1.452936  |
| H  | -1.419263 | 0.313860  | -1.668529 |
| C  | -0.833975 | -0.608723 | -1.609773 |
| H  | 0.013062  | -0.620903 | 2.154341  |
| C  | -0.550254 | 0.139212  | 1.595973  |
| H  | -0.213310 | 1.162878  | 1.776427  |
| Cu | 0.538394  | -0.006112 | -0.169540 |
| C  | 2.296908  | 0.501133  | 0.632387  |
| N  | 2.728418  | 1.674274  | 1.131238  |
| H  | 1.521526  | -2.744920 | 4.838770  |
| N  | 3.188913  | -0.433178 | 0.936565  |
| C  | 1.274829  | -1.685682 | -2.623746 |
| O  | 0.922131  | -2.809443 | -1.982830 |
| C  | 0.468171  | -0.516230 | -2.250968 |
| O  | 1.974215  | 1.020360  | -3.319210 |
| C  | 0.869907  | 0.754838  | -2.864994 |
| C  | 3.102081  | -1.813526 | 0.501731  |
| C  | 4.396154  | 0.103404  | 1.570869  |
| H  | 5.221329  | 0.038573  | 0.846562  |
| C  | 3.984469  | 1.545151  | 1.880428  |
| H  | 3.805711  | 1.717167  | 2.954421  |
| C  | 2.076330  | 2.932948  | 0.989169  |

|    |           |           |           |
|----|-----------|-----------|-----------|
| C  | 2.334380  | 3.683683  | -0.173858 |
| C  | 1.266117  | 3.428202  | 2.022814  |
| C  | 1.702140  | 4.919963  | -0.319039 |
| C  | 0.647384  | 4.670689  | 1.836241  |
| C  | 0.853329  | 5.405479  | 0.675099  |
| H  | 0.360794  | 6.371927  | 0.546188  |
| Na | 3.926490  | -0.280615 | -2.810055 |
| H  | 4.721795  | 2.285207  | 1.537966  |
| H  | 4.661603  | -0.468610 | 2.471063  |
| O  | -0.108164 | 1.672802  | -2.870446 |
| O  | 2.190636  | -1.704440 | -3.429634 |
| C  | 1.638282  | -3.988206 | -2.317519 |
| H  | 1.514608  | -4.232343 | -3.381536 |
| H  | 1.213755  | -4.784699 | -1.696647 |
| H  | 2.709197  | -3.864794 | -2.102245 |
| C  | 0.203059  | 2.964261  | -3.366504 |
| H  | 0.849921  | 3.505807  | -2.662245 |
| H  | -0.752987 | 3.490203  | -3.461819 |
| H  | 0.700222  | 2.901428  | -4.343285 |
| H  | 2.333833  | -1.829739 | -0.285084 |
| C  | 2.624327  | -2.739051 | 1.604218  |
| C  | 2.446167  | -4.103657 | 1.334013  |
| C  | 2.284506  | -2.272462 | 2.879543  |
| C  | 1.946249  | -4.970482 | 2.303461  |
| H  | 2.689463  | -4.493748 | 0.343960  |
| C  | 1.784085  | -3.137463 | 3.853619  |
| H  | 2.391464  | -1.211332 | 3.112471  |
| C  | 1.611209  | -4.490732 | 3.570444  |
| H  | 1.810484  | -6.028084 | 2.065739  |
| H  | 1.214880  | -5.168436 | 4.329713  |
| C  | 4.440836  | -2.207565 | -0.201187 |
| H  | 4.289894  | -3.265528 | -0.544441 |
| H  | 5.198318  | -2.312251 | 0.627751  |
| O  | 4.777240  | -1.341632 | -1.165210 |
| H  | -0.956900 | -2.644730 | 1.347521  |
| H  | -1.551054 | -2.410658 | 2.997038  |
| B  | -2.733112 | 1.269766  | 1.037463  |
| O  | -3.901094 | 1.270715  | 0.319105  |
| O  | -2.264562 | 2.537078  | 1.267299  |
| C  | -4.334316 | 2.637798  | 0.176316  |
| C  | -2.996139 | 3.430662  | 0.410843  |
| C  | -2.162765 | 3.591536  | -0.859779 |
| H  | -2.042431 | 2.632254  | -1.383703 |
| H  | -2.611021 | 4.317881  | -1.552855 |
| H  | -1.160024 | 3.945880  | -0.579723 |
| C  | -3.167293 | 4.773039  | 1.102854  |
| H  | -3.812319 | 5.433583  | 0.504410  |
| H  | -3.608868 | 4.660849  | 2.101368  |
| H  | -2.187169 | 5.257525  | 1.212695  |
| C  | -5.379538 | 2.892948  | 1.260575  |
| H  | -6.189041 | 2.156641  | 1.155032  |
| H  | -4.946149 | 2.782302  | 2.265236  |
| H  | -5.812806 | 3.899308  | 1.173446  |
| C  | -4.944626 | 2.820521  | -1.204221 |
| H  | -5.181214 | 3.879860  | -1.383576 |
| H  | -4.263954 | 2.474545  | -1.992489 |
| H  | -5.877992 | 2.244348  | -1.279717 |
| C  | 1.094366  | 2.697262  | 3.328219  |
| H  | 1.341399  | 1.631704  | 3.244781  |
| H  | 1.750150  | 3.135731  | 4.097711  |
| H  | 0.059200  | 2.780918  | 3.687374  |
| C  | 3.296492  | 3.172175  | -1.210887 |
| H  | 4.266346  | 2.913318  | -0.759677 |
| H  | 2.912881  | 2.269728  | -1.705397 |
| H  | 3.473029  | 3.928770  | -1.987535 |
| H  | -0.003765 | 5.060678  | 2.622224  |
| H  | 1.889426  | 5.515325  | -1.216154 |

108

Figure\_S15-8\_AA-9b(Na)-ts(1,6minor)\_02 / electronic energy: -4131.83467184 a.u. / lowest freq: -367.23 cm-1

|    |           |           |           |
|----|-----------|-----------|-----------|
| C  | 3.744702  | -2.198824 | 1.501565  |
| H  | 4.331218  | -2.715679 | 0.725801  |
| C  | 4.231469  | -0.774393 | 1.748637  |
| H  | 4.146530  | -0.474517 | 2.807467  |
| C  | 2.212658  | -0.709560 | 0.575831  |
| C  | 3.530030  | 1.398801  | 0.711775  |
| C  | 4.360046  | 1.765199  | -0.366707 |
| C  | 3.039096  | 2.356338  | 1.615910  |
| C  | 4.644401  | 3.119864  | -0.557932 |
| C  | 3.340496  | 3.703629  | 1.381032  |
| C  | 4.128535  | 4.085916  | 0.302520  |
| H  | 4.356215  | 5.141506  | 0.138839  |
| Cu | 0.423493  | -0.257594 | -0.184479 |
| N  | 2.393602  | -1.963477 | 0.985207  |
| N  | 3.292732  | 0.009439  | 0.934214  |
| C  | -1.029747 | 0.073554  | -1.641941 |
| C  | 0.171884  | -0.409647 | -2.293452 |
| Na | 3.190713  | -1.949157 | -2.601875 |
| H  | 5.269693  | -0.606802 | 1.431182  |
| H  | 3.734237  | -2.816281 | 2.409522  |

|   |           |           |           |
|---|-----------|-----------|-----------|
| H | -1.059969 | 1.162210  | -1.530525 |
| C | 1.184742  | 0.549850  | -2.741702 |
| C | 0.323535  | -1.785208 | -2.791266 |
| O | 0.797040  | 1.827950  | -2.623617 |
| O | 2.301140  | 0.269599  | -3.158118 |
| O | 1.096857  | -2.145207 | -3.662471 |
| O | -0.476703 | -2.671457 | -2.184955 |
| C | -0.296011 | -4.033147 | -2.555688 |
| H | -0.542104 | -4.186112 | -3.615550 |
| H | -0.982069 | -4.609987 | -1.925332 |
| H | 0.747911  | -4.324952 | -2.372611 |
| C | 1.763035  | 2.828233  | -2.903359 |
| H | 2.539740  | 2.843658  | -2.125952 |
| H | 1.224234  | 3.782006  | -2.905022 |
| H | 2.232048  | 2.660361  | -3.882023 |
| C | 1.509131  | -3.057510 | 0.626134  |
| H | 0.786893  | -2.641637 | -0.094484 |
| C | 0.717939  | -3.589081 | 1.802350  |
| C | -0.281792 | -4.545707 | 1.573464  |
| C | 0.898100  | -3.125608 | 3.109988  |
| C | -1.066147 | -5.031170 | 2.617253  |
| H | -0.460642 | -4.902648 | 0.556434  |
| C | 0.114616  | -3.609105 | 4.158794  |
| H | 1.640164  | -2.350824 | 3.311715  |
| C | -0.869734 | -4.565720 | 3.918320  |
| H | -1.842729 | -5.771427 | 2.411515  |
| H | 0.270388  | -3.224879 | 5.169569  |
| H | -1.487537 | -4.940418 | 4.737343  |
| C | 2.318297  | -4.117332 | -0.185351 |
| H | 1.578697  | -4.927798 | -0.417850 |
| H | 3.014946  | -4.605770 | 0.552746  |
| O | 2.914561  | -3.573122 | -1.254187 |
| C | -0.545810 | -0.003196 | 1.640476  |
| H | 0.258722  | 0.621489  | 2.030102  |
| H | -0.506820 | -1.039549 | 1.999909  |
| C | -1.807081 | 0.628445  | 1.513176  |
| C | -2.997468 | -0.080121 | 1.389963  |
| H | -3.928729 | 0.483252  | 1.484674  |
| C | -3.054486 | -1.561811 | 1.615612  |
| H | -2.347135 | -2.088795 | 0.951187  |
| H | -2.762763 | -1.821822 | 2.648629  |
| H | -4.059981 | -1.965905 | 1.435861  |
| C | -2.262064 | -0.580436 | -1.441637 |
| H | -2.331990 | -1.642403 | -1.669266 |
| C | -3.346622 | 0.078692  | -0.886271 |
| H | -3.289364 | 1.165822  | -0.801670 |
| C | -4.725027 | -0.449458 | -0.895746 |
| C | -5.789241 | 0.424133  | -0.615996 |
| C | -5.029807 | -1.793854 | -1.164259 |
| C | -7.107636 | -0.024393 | -0.606079 |
| H | -5.569379 | 1.472775  | -0.396554 |
| C | -6.348045 | -2.244102 | -1.153453 |
| H | -4.228762 | -2.503631 | -1.378937 |
| C | -7.394311 | -1.363350 | -0.874797 |
| H | -7.916210 | 0.676509  | -0.385954 |
| H | -6.559571 | -3.295208 | -1.363326 |
| H | -8.426827 | -1.719529 | -0.866738 |
| B | -1.803044 | 2.164515  | 1.259070  |
| O | -2.916762 | 2.932004  | 1.036985  |
| O | -0.643557 | 2.882911  | 1.117438  |
| C | -2.483014 | 4.184268  | 0.471566  |
| C | -0.985738 | 4.269429  | 0.954135  |
| C | -0.029313 | 4.891270  | -0.050840 |
| H | -0.017672 | 4.324720  | -0.989418 |
| H | -0.311255 | 5.932549  | -0.266432 |
| H | 0.990706  | 4.884968  | 0.358288  |
| C | -0.828711 | 4.936774  | 2.319279  |
| H | -1.510125 | 4.496910  | 3.061999  |
| H | 0.202023  | 4.787983  | 2.671836  |
| H | -1.021166 | 6.017379  | 2.263344  |
| C | -3.381755 | 5.299873  | 0.980533  |
| H | -4.399393 | 5.163300  | 0.587545  |
| H | -3.437678 | 5.307338  | 2.076342  |
| H | -3.012365 | 6.278127  | 0.638669  |
| C | -2.612935 | 4.055383  | -1.046541 |
| H | -2.364693 | 4.997806  | -1.554376 |
| H | -1.957007 | 3.266249  | -1.442792 |
| H | -3.651090 | 3.792092  | -1.295001 |
| H | 2.962180  | 4.458613  | 2.075242  |
| H | 5.281821  | 3.418101  | -1.393996 |
| C | 2.222766  | 1.997085  | 2.827328  |
| H | 1.188215  | 2.347110  | 2.692683  |
| H | 2.195211  | 0.916541  | 3.013234  |
| H | 2.630332  | 2.489675  | 3.722001  |
| C | 4.906351  | 0.742752  | -1.325777 |
| H | 5.130543  | -0.216377 | -0.839560 |
| H | 4.163427  | 0.558266  | -2.116701 |
| H | 5.824044  | 1.110339  | -1.804093 |

Figure\_S15-8\_AA-9b(Na)-ts(1,6minor)\_03 / electronic energy: -4131.83689786 a.u. / lowest freq: -278.48 cm-1

|    |           |           |           |
|----|-----------|-----------|-----------|
| O  | -4.345619 | 1.320086  | -0.464245 |
| H  | -0.319067 | 3.008243  | -2.809453 |
| H  | -0.434326 | 1.382129  | -3.529179 |
| H  | 0.398212  | 1.600214  | -1.981732 |
| C  | -0.465758 | 1.944954  | -2.579187 |
| C  | -1.747182 | 1.697752  | -1.846203 |
| H  | -0.464119 | -0.650336 | -2.251076 |
| H  | -2.523385 | 2.464686  | -1.902631 |
| C  | -1.189500 | -0.644315 | -1.433522 |
| C  | -2.102515 | 0.436667  | -1.387518 |
| H  | -1.567592 | -1.642404 | -1.174336 |
| B  | -3.456918 | 0.287291  | -0.630669 |
| O  | -3.874982 | -0.859750 | -0.010877 |
| H  | -6.239483 | -2.003129 | -0.209873 |
| H  | -6.117221 | -0.244288 | -1.717454 |
| H  | -6.696258 | 1.432470  | -1.571984 |
| C  | -5.544040 | 0.781142  | 0.124980  |
| C  | -6.521080 | 0.500496  | -1.016073 |
| C  | -5.982668 | -1.694539 | 0.811397  |
| C  | -5.008273 | -0.527526 | 0.813676  |
| H  | -5.532709 | -2.555875 | 1.325971  |
| H  | -6.908138 | -1.426723 | 1.342494  |
| H  | -7.486608 | 0.136796  | -0.637103 |
| C  | -4.483785 | -0.278825 | 2.227277  |
| H  | -3.911930 | -1.155271 | 2.559149  |
| H  | -5.305484 | -0.103014 | 2.935603  |
| H  | -6.484102 | 2.682344  | 0.513949  |
| H  | -5.396436 | 2.149813  | 1.815677  |
| C  | -6.134614 | 1.806931  | 1.079909  |
| H  | -6.995707 | 1.381312  | 1.616144  |
| C  | 4.148988  | -1.712769 | -1.288264 |
| H  | 4.756013  | -2.192471 | -0.506693 |
| C  | 3.332146  | -2.721668 | -2.103872 |
| H  | 3.360087  | -2.516036 | -3.185921 |
| C  | 1.895613  | -1.457521 | -0.752886 |
| C  | 0.873095  | -3.330585 | -1.945476 |
| C  | 0.453207  | -4.329405 | -1.050283 |
| C  | 0.233206  | -3.119503 | -3.176576 |
| C  | -0.666095 | -5.093601 | -1.390751 |
| C  | -0.879723 | -3.909183 | -3.483691 |
| C  | -1.332261 | -4.880310 | -2.595970 |
| H  | -2.208648 | -5.481754 | -2.847434 |
| Cu | 0.291167  | -0.622540 | 0.055024  |
| N  | 3.104036  | -0.923552 | -0.627940 |
| N  | 1.979300  | -2.514969 | -1.576877 |
| C  | -0.696789 | 0.506483  | 1.436639  |
| C  | 0.149075  | -0.362478 | 2.244352  |
| H  | 3.655034  | -3.760963 | -1.947505 |
| H  | 4.792615  | -1.077043 | -1.912572 |
| H  | -1.753697 | 0.235675  | 1.400636  |
| C  | -0.285536 | -1.746355 | 2.450774  |
| C  | 1.242008  | 0.119730  | 3.090393  |
| O  | -1.495657 | -1.973942 | 1.916062  |
| O  | 0.348116  | -2.653408 | 2.975774  |
| O  | 1.879987  | -0.546654 | 3.891758  |
| O  | 1.496651  | 1.428579  | 2.952681  |
| C  | 2.520383  | 1.972882  | 3.767402  |
| H  | 2.272682  | 1.872193  | 4.833357  |
| H  | 2.589990  | 3.032532  | 3.497475  |
| H  | 3.479807  | 1.469283  | 3.579658  |
| C  | -1.986789 | -3.299899 | 1.884395  |
| H  | -1.318757 | -3.952729 | 1.305806  |
| H  | -2.959326 | -3.237034 | 1.383665  |
| H  | -2.101362 | -3.708045 | 2.898565  |
| C  | 3.424686  | 0.144054  | 0.300173  |
| H  | 2.539436  | 0.245512  | 0.943652  |
| C  | 3.632608  | 1.476159  | -0.393739 |
| C  | 4.006334  | 2.603647  | 0.352735  |
| C  | 3.407538  | 1.642395  | -1.765616 |
| C  | 4.170444  | 3.846787  | -0.255565 |
| H  | 4.166089  | 2.510517  | 1.428095  |
| C  | 3.567182  | 2.886145  | -2.377324 |
| H  | 3.088433  | 0.787549  | -2.365210 |
| C  | 3.957094  | 3.993378  | -1.626583 |
| H  | 4.461557  | 4.709232  | 0.348608  |
| H  | 3.381653  | 2.989149  | -3.448879 |
| H  | 4.086744  | 4.966597  | -2.105124 |
| C  | 4.579380  | -0.336380 | 1.239048  |
| H  | 4.725774  | 0.498839  | 1.973509  |
| H  | 5.515851  | -0.296494 | 0.611168  |
| O  | 4.318947  | -1.529238 | 1.788321  |
| C  | -0.331778 | 1.762558  | 0.898475  |
| H  | 0.721377  | 2.044719  | 0.921295  |
| C  | -1.241938 | 2.630310  | 0.316990  |
| H  | -2.303994 | 2.485932  | 0.522155  |
| C  | -0.875947 | 3.972965  | -0.162348 |
| C  | -1.886568 | 4.925124  | -0.375849 |
| C  | 0.451227  | 4.342388  | -0.442830 |

|    |           |           |           |
|----|-----------|-----------|-----------|
| C  | -1.586180 | 6.203507  | -0.839920 |
| H  | -2.925869 | 4.649981  | -0.175213 |
| C  | 0.751068  | 5.620783  | -0.904953 |
| H  | 1.263713  | 3.622352  | -0.319818 |
| C  | -0.262997 | 6.558913  | -1.105532 |
| H  | -2.389623 | 6.927295  | -0.995582 |
| H  | 1.790812  | 5.880083  | -1.116411 |
| H  | -0.024082 | 7.560002  | -1.471258 |
| Na | 2.770159  | -2.451470 | 2.945891  |
| H  | -1.402439 | -3.748800 | -4.429724 |
| H  | -1.013399 | -5.869911 | -0.704384 |
| C  | 1.195267  | -4.562281 | 0.238110  |
| H  | 2.280348  | -4.631053 | 0.069876  |
| H  | 1.029961  | -3.741829 | 0.952112  |
| H  | 0.860928  | -5.491379 | 0.719065  |
| C  | 0.720069  | -2.076071 | -4.146708 |
| H  | -0.109196 | -1.692962 | -4.756603 |
| H  | 1.190225  | -1.226291 | -3.631864 |
| H  | 1.469046  | -2.498638 | -4.836087 |
| H  | -3.808950 | 0.589046  | 2.257302  |

108

Figure\_S15-8\_AA-9b(Na)-ts(1,6minor)\_04 / electronic energy: -4131.83652085 a.u. / lowest freq: -256.32 cm-1

|    |           |           |           |
|----|-----------|-----------|-----------|
| H  | 0.240753  | 3.102240  | -2.948830 |
| H  | -0.250135 | 1.537782  | -3.645488 |
| H  | 0.715772  | 1.576953  | -2.159948 |
| C  | -0.101504 | 2.089142  | -2.699962 |
| C  | -1.353857 | 2.107970  | -1.877130 |
| H  | -0.569540 | -0.443274 | -2.308774 |
| H  | -1.948270 | 3.025406  | -1.882386 |
| C  | -1.276541 | -0.302667 | -1.486788 |
| C  | -1.941552 | 0.945340  | -1.401470 |
| H  | -1.857420 | -1.204747 | -1.251514 |
| B  | -3.276770 | 1.043029  | -0.599758 |
| O  | -3.718830 | 2.207413  | -0.022934 |
| O  | -4.124728 | -0.006717 | -0.358454 |
| H  | -5.952910 | 1.463678  | -1.643946 |
| H  | -6.124425 | 3.271794  | -0.188480 |
| H  | -5.381503 | 3.907840  | 1.297322  |
| C  | -4.815393 | 1.876913  | 0.850144  |
| C  | -5.823914 | 3.013835  | 0.834884  |
| C  | -6.327595 | 0.736586  | -0.908687 |
| C  | -5.327862 | 0.528462  | 0.228657  |
| H  | -6.483521 | -0.221399 | -1.424699 |
| H  | -7.297896 | 1.088929  | -0.531315 |
| H  | -6.722335 | 2.741223  | 1.408509  |
| C  | -5.888030 | -0.459370 | 1.239472  |
| H  | -6.200196 | -1.380673 | 0.726638  |
| H  | -6.770009 | -0.032303 | 1.739534  |
| H  | -3.672571 | 2.601321  | 2.525943  |
| H  | -3.549595 | 0.837428  | 2.296921  |
| C  | -4.234908 | 1.696767  | 2.252951  |
| H  | -5.027873 | 1.544968  | 2.998847  |
| C  | 3.581861  | -2.740661 | -1.156118 |
| H  | 3.988632  | -3.375782 | -0.355504 |
| C  | 2.555491  | -3.473123 | -2.027412 |
| H  | 2.690476  | -3.273396 | -3.102450 |
| C  | 1.468136  | -1.865071 | -0.715511 |
| C  | 0.018744  | -3.367350 | -1.986466 |
| C  | -0.717623 | -4.191249 | -1.118507 |
| C  | -0.472750 | -2.983677 | -3.243708 |
| C  | -1.995251 | -4.594396 | -1.515224 |
| C  | -1.752209 | -3.414872 | -3.608176 |
| C  | -2.511441 | -4.203606 | -2.749369 |
| H  | -3.513957 | -4.520797 | -3.044810 |
| Cu | 0.122663  | -0.616158 | 0.034778  |
| N  | 2.770336  | -1.692380 | -0.530261 |
| N  | 1.291123  | -2.900128 | -1.553925 |
| C  | -0.536117 | 0.771633  | 1.380577  |
| C  | 0.013531  | -0.281765 | 2.219580  |
| H  | 2.568102  | -4.562450 | -1.879925 |
| H  | 4.408987  | -2.308239 | -1.736604 |
| H  | -1.623964 | 0.835731  | 1.342887  |
| C  | -0.793816 | -1.485214 | 2.429149  |
| C  | 1.171517  | -0.096437 | 3.096238  |
| O  | -2.002200 | -1.385549 | 1.845843  |
| O  | -0.453363 | -2.518054 | 2.990627  |
| O  | 1.575508  | -0.888878 | 3.933712  |
| O  | 1.780684  | 1.086951  | 2.941159  |
| C  | 2.886691  | 1.356228  | 3.785122  |
| H  | 2.578726  | 1.392348  | 4.839699  |
| H  | 3.272304  | 2.333530  | 3.474171  |
| H  | 3.663720  | 0.586707  | 3.669790  |
| C  | -2.831388 | -2.532708 | 1.804414  |
| H  | -2.263931 | -3.419507 | 1.494275  |
| H  | -3.609310 | -2.305969 | 1.067774  |
| H  | -3.282851 | -2.723745 | 2.789098  |
| C  | 3.337668  | -0.752093 | 0.416474  |
| H  | 2.489237  | -0.404300 | 1.021483  |
| C  | 3.932076  | 0.466187  | -0.265368 |



|    |           |           |           |
|----|-----------|-----------|-----------|
| C  | 4.611943  | 1.433340  | 0.489572  |
| C  | 3.770416  | 0.699519  | -1.636961 |
| C  | 5.128962  | 2.581152  | -0.108719 |
| H  | 4.737838  | 1.290357  | 1.563714  |
| C  | 4.285058  | 1.848160  | -2.239128 |
| H  | 3.222385  | -0.022688 | -2.245101 |
| C  | 4.973737  | 2.791400  | -1.479113 |
| H  | 5.655516  | 3.317764  | 0.502386  |
| H  | 4.140818  | 2.006647  | -3.310232 |
| H  | 5.382490  | 3.688271  | -1.949845 |
| C  | 4.272706  | -1.530194 | 1.399652  |
| H  | 4.609332  | -0.766560 | 2.149236  |
| H  | 5.211714  | -1.750319 | 0.814298  |
| O  | 3.671358  | -2.605345 | 1.925176  |
| C  | 0.170636  | 1.861244  | 0.822076  |
| H  | 1.261294  | 1.831509  | 0.828060  |
| C  | -0.474762 | 2.937122  | 0.238182  |
| H  | -1.532872 | 3.085428  | 0.458842  |
| C  | 0.236692  | 4.104001  | -0.303732 |
| C  | -0.479565 | 5.284193  | -0.565081 |
| C  | 1.611369  | 4.085562  | -0.599736 |
| C  | 0.149968  | 6.407972  | -1.094398 |
| H  | -1.551458 | 5.312547  | -0.350060 |
| C  | 2.240577  | 5.209932  | -1.126409 |
| H  | 2.202359  | 3.181167  | -0.435775 |
| C  | 1.516358  | 6.376701  | -1.377211 |
| H  | -0.428533 | 7.314396  | -1.287530 |
| H  | 3.309348  | 5.167851  | -1.347480 |
| H  | 2.013213  | 7.255705  | -1.793606 |
| Na | 1.917420  | -3.010587 | 3.096071  |
| H  | -2.163140 | -3.110562 | -4.573876 |
| H  | -2.589129 | -5.227041 | -0.850823 |
| C  | -0.132861 | -4.619633 | 0.200464  |
| H  | 0.880352  | -5.029729 | 0.073708  |
| H  | -0.050560 | -3.773213 | 0.898422  |
| H  | -0.758425 | -5.386731 | 0.676542  |
| C  | 0.338348  | -2.121331 | -4.173911 |
| H  | -0.316116 | -1.527023 | -4.825761 |
| H  | 0.992520  | -1.431249 | -3.622380 |
| H  | 0.981405  | -2.737423 | -4.823276 |
| H  | -5.148749 | -0.725213 | 2.004159  |

108

Figure\_S15-8\_AA-9b(Na)-ts(1,6minor)\_05 / electronic energy: -4131.83783555 a.u. / lowest freq: -304.38 cm<sup>-1</sup>

|    |           |           |           |
|----|-----------|-----------|-----------|
| C  | -0.706503 | -4.178043 | 1.732618  |
| H  | -0.874025 | -5.039986 | 1.071225  |
| C  | 0.758127  | -4.025524 | 2.171529  |
| H  | 0.865581  | -3.901055 | 3.260370  |
| C  | 0.153636  | -2.211995 | 0.816525  |
| C  | 2.493934  | -2.294503 | 1.474899  |
| C  | 3.307845  | -2.561649 | 0.360192  |
| C  | 2.949445  | -1.539252 | 2.567080  |
| C  | 4.594812  | -2.019735 | 0.340076  |
| C  | 4.238864  | -1.000439 | 2.499364  |
| C  | 5.053112  | -1.234953 | 1.396010  |
| H  | 6.056047  | -0.804289 | 1.358075  |
| Cu | 0.200948  | -0.433923 | -0.043425 |
| N  | -0.941617 | -2.945840 | 0.970678  |
| N  | 1.163420  | -2.802139 | 1.472900  |
| C  | -0.083364 | 0.867462  | -1.613544 |
| C  | 0.460176  | -0.359487 | -2.154821 |
| Na | -0.354756 | -4.671385 | -2.269604 |
| H  | 1.387231  | -4.874732 | 1.865367  |
| H  | -1.397178 | -4.253693 | 2.584629  |
| H  | 0.659306  | 1.665675  | -1.532677 |
| C  | 1.921922  | -0.308020 | -2.361591 |
| C  | -0.329708 | -1.457140 | -2.717199 |
| O  | 2.399874  | -1.185078 | -3.248530 |
| O  | 2.654027  | 0.493748  | -1.808791 |
| O  | 0.092200  | -2.566040 | -3.019781 |
| O  | -1.625644 | -1.159731 | -2.858649 |
| C  | -2.496093 | -2.191703 | -3.312116 |
| H  | -2.223209 | -2.506320 | -4.329906 |
| H  | -3.498179 | -1.748482 | -3.321696 |
| H  | -2.462042 | -3.057430 | -2.628718 |
| C  | 3.799712  | -1.164010 | -3.463580 |
| H  | 4.115080  | -0.214355 | -3.919606 |
| H  | 4.017671  | -1.994730 | -4.144047 |
| H  | 4.343225  | -1.295293 | -2.517816 |
| C  | -2.218873 | -2.629423 | 0.353956  |
| H  | -1.983235 | -2.004963 | -0.521153 |
| C  | -3.134426 | -1.826019 | 1.253367  |
| C  | -4.278162 | -1.236723 | 0.696177  |
| C  | -2.893511 | -1.642012 | 2.618401  |
| C  | -5.161397 | -0.499546 | 1.481251  |
| H  | -4.470434 | -1.348387 | -0.374673 |
| C  | -3.776594 | -0.904776 | 3.408227  |
| H  | -1.992530 | -2.060228 | 3.071778  |
| C  | -4.915840 | -0.333863 | 2.844599  |
| H  | -6.040558 | -0.040403 | 1.023604  |

|   |           |           |           |
|---|-----------|-----------|-----------|
| H | -3.565105 | -0.767120 | 4.471072  |
| H | -5.601377 | 0.251621  | 3.460855  |
| C | -2.870326 | -3.932739 | -0.205399 |
| H | -3.839134 | -3.592134 | -0.656238 |
| H | -3.192795 | -4.523775 | 0.696365  |
| O | -2.063350 | -4.592339 | -1.048821 |
| C | 0.168590  | 0.733963  | 1.674200  |
| H | 1.191013  | 0.420812  | 1.918111  |
| H | -0.609531 | 0.227514  | 2.258725  |
| C | 0.007570  | 2.104196  | 1.353375  |
| C | -1.234045 | 2.725439  | 1.312646  |
| H | -1.251992 | 3.810935  | 1.181086  |
| C | -2.456454 | 2.078422  | 1.891550  |
| H | -2.668233 | 1.112381  | 1.402506  |
| H | -2.321209 | 1.858872  | 2.965226  |
| H | -3.348899 | 2.709427  | 1.786806  |
| C | -1.417910 | 1.272470  | -1.391256 |
| H | -2.221424 | 0.544089  | -1.494377 |
| C | -1.698966 | 2.575141  | -1.004531 |
| H | -0.905037 | 3.316119  | -1.120465 |
| C | -3.061887 | 3.127030  | -0.931900 |
| C | -3.238697 | 4.519277  | -0.865843 |
| C | -4.209676 | 2.317108  | -0.898875 |
| C | -4.508562 | 5.082408  | -0.767685 |
| H | -2.357789 | 5.167257  | -0.884031 |
| C | -5.480073 | 2.878576  | -0.802859 |
| H | -4.110350 | 1.230755  | -0.924628 |
| C | -5.638680 | 4.263719  | -0.735053 |
| H | -4.617929 | 6.168192  | -0.714467 |
| H | -6.356454 | 2.226245  | -0.775524 |
| H | -6.635624 | 4.702658  | -0.655242 |
| B | 1.286912  | 2.863805  | 0.887826  |
| O | 1.285192  | 4.054079  | 0.208017  |
| O | 2.548197  | 2.382803  | 1.099297  |
| C | 2.624391  | 4.305562  | -0.260913 |
| C | 3.496628  | 3.370840  | 0.668945  |
| C | 4.643630  | 2.665738  | -0.041715 |
| H | 4.268214  | 1.995859  | -0.824814 |
| H | 5.338022  | 3.397755  | -0.481259 |
| H | 5.202805  | 2.056803  | 0.683636  |
| C | 4.003018  | 4.075673  | 1.927233  |
| H | 3.184516  | 4.581595  | 2.459918  |
| H | 4.434736  | 3.324731  | 2.604555  |
| H | 4.779473  | 4.817055  | 1.691397  |
| C | 2.921064  | 5.791780  | -0.122995 |
| H | 2.272078  | 6.363338  | -0.802130 |
| H | 2.742965  | 6.149140  | 0.899159  |
| H | 3.966886  | 6.002655  | -0.391554 |
| C | 2.668105  | 3.898502  | -1.732646 |
| H | 3.638220  | 4.147316  | -2.186024 |
| H | 2.498051  | 2.820412  | -1.855961 |
| H | 1.883557  | 4.445763  | -2.275691 |
| C | 2.092658  | -1.323333 | 3.786196  |
| H | 2.331803  | -0.366040 | 4.268919  |
| H | 1.022251  | -1.324354 | 3.541091  |
| H | 2.266077  | -2.120354 | 4.527811  |
| C | 2.791716  | -3.401267 | -0.777233 |
| H | 2.344269  | -4.338787 | -0.412359 |
| H | 2.011638  | -2.872960 | -1.346428 |
| H | 3.600500  | -3.657638 | -1.474718 |
| H | 4.603615  | -0.386158 | 3.326203  |
| H | 5.247890  | -2.217918 | -0.513400 |

13

Figure\_S15-9\_Na0Ph / electronic energy: -468.853649444 a.u. / lowest freq: 15.68 cm-1

|    |           |           |           |
|----|-----------|-----------|-----------|
| C  | -1.912599 | -1.200838 | -0.011375 |
| C  | -0.521476 | -1.206572 | 0.015351  |
| C  | 0.241248  | 0.001459  | 0.028090  |
| C  | -0.524240 | 1.207747  | 0.015228  |
| C  | -1.915348 | 1.198823  | -0.011498 |
| C  | -2.633248 | -0.001829 | -0.025828 |
| H  | -2.448993 | -2.155315 | -0.021458 |
| H  | 0.025710  | -2.154567 | 0.026010  |
| H  | 0.020847  | 2.156944  | 0.025804  |
| H  | -2.453903 | 2.152085  | -0.021671 |
| H  | -3.725390 | -0.003095 | -0.047610 |
| O  | 1.527681  | 0.002959  | 0.048939  |
| Na | 3.632205  | -0.001133 | -0.037490 |

46

Figure\_S15-9\_(Ph0)2BpinNa / electronic energy: -1186.36814498 a.u. / lowest freq: 13.97 cm-1

|   |           |          |           |
|---|-----------|----------|-----------|
| B | -0.563220 | 0.044928 | -0.178943 |
| O | 0.291267  | 0.926614 | 0.688425  |
| C | 1.283536  | 1.704672 | 0.236971  |
| C | 1.570313  | 1.877919 | -1.127640 |
| C | 2.065408  | 2.387362 | 1.183443  |
| C | 2.618259  | 2.709596 | -1.518355 |
| H | 0.968476  | 1.357829 | -1.872206 |
| C | 3.108859  | 3.216376 | 0.779645  |
| H | 1.838595  | 2.254777 | 2.244585  |
| C | 3.395857  | 3.384044 | -0.576007 |

|    |           |           |           |
|----|-----------|-----------|-----------|
| H  | 2.826632  | 2.832602  | -2.584305 |
| H  | 3.704622  | 3.736239  | 1.534259  |
| H  | 4.214297  | 4.033139  | -0.893992 |
| Na | -0.808966 | 0.523795  | 2.687870  |
| O  | -1.401273 | 0.751365  | -1.110868 |
| O  | -1.477954 | -0.585186 | 0.786000  |
| C  | -2.750349 | 0.668453  | -0.700149 |
| C  | -2.762683 | -0.634075 | 0.179234  |
| C  | -3.835371 | -0.661639 | 1.260867  |
| C  | -2.856470 | -1.909073 | -0.666303 |
| C  | -3.649998 | 0.599972  | -1.930115 |
| C  | -3.098822 | 1.925515  | 0.107771  |
| H  | -3.332450 | -0.201151 | -2.609851 |
| H  | -3.597144 | 1.551134  | -2.480503 |
| H  | -4.700038 | 0.428292  | -1.646429 |
| H  | -2.493507 | 1.994151  | 1.022809  |
| H  | -4.162427 | 1.964752  | 0.386050  |
| H  | -2.867924 | 2.809936  | -0.503853 |
| H  | -3.713572 | 0.159050  | 1.981888  |
| H  | -3.788318 | -1.612147 | 1.813558  |
| H  | -4.838966 | -0.577840 | 0.817054  |
| H  | -2.121263 | -1.893048 | -1.482449 |
| H  | -3.861061 | -2.045468 | -1.092990 |
| H  | -2.632217 | -2.773934 | -0.024406 |
| H  | 1.663800  | -2.361720 | -2.479463 |
| C  | 1.156468  | -1.758231 | -0.480048 |
| C  | 1.868619  | -2.528543 | -1.419688 |
| C  | 1.421837  | -1.970396 | 0.885132  |
| C  | 2.803385  | -3.473353 | -1.010584 |
| C  | 2.361381  | -2.920725 | 1.284246  |
| H  | 3.340044  | -4.056682 | -1.763421 |
| C  | 3.059848  | -3.680848 | 0.347231  |
| H  | 2.547156  | -3.067370 | 2.351610  |
| H  | 3.793490  | -4.423052 | 0.668193  |
| O  | 0.272585  | -0.884037 | -0.951749 |
| H  | 0.889028  | -1.388098 | 1.633642  |

33

Figure\_S15-9\_PhOBpin / electronic energy: -717.466658936 a.u. / lowest freq: 34.04 cm-1

|   |           |           |           |
|---|-----------|-----------|-----------|
| B | 0.316485  | -0.649497 | 0.152442  |
| O | 0.547339  | 0.656564  | -0.167517 |
| O | 1.450352  | -1.390749 | 0.310010  |
| C | 1.953393  | 0.765407  | -0.475562 |
| C | 2.556556  | -0.464329 | 0.303349  |
| C | 3.750402  | -1.118973 | -0.372082 |
| H | 4.110941  | -1.956020 | 0.242581  |
| H | 3.490766  | -1.511055 | -1.363342 |
| H | 4.572751  | -0.396645 | -0.481985 |
| C | 2.881450  | -0.142716 | 1.761241  |
| H | 3.761317  | 0.510734  | 1.842022  |
| H | 2.033939  | 0.348756  | 2.261363  |
| H | 3.094875  | -1.080566 | 2.293131  |
| C | 2.090739  | 0.636050  | -1.991454 |
| H | 3.132712  | 0.771530  | -2.312966 |
| H | 1.476060  | 1.410062  | -2.472261 |
| H | 1.740869  | -0.345498 | -2.343688 |
| C | 2.458430  | 2.121802  | -0.012348 |
| H | 1.979441  | 2.916387  | -0.602078 |
| H | 2.232209  | 2.298870  | 1.046507  |
| H | 3.546064  | 2.197566  | -0.158022 |
| H | -2.930733 | -2.174758 | -0.976580 |
| O | -0.912560 | -1.220338 | 0.303715  |
| C | -3.126356 | -1.200585 | -0.524893 |
| C | -2.103803 | -0.564658 | 0.181286  |
| C | -4.371635 | -0.585968 | -0.642680 |
| C | -2.327104 | 0.678308  | 0.778803  |
| C | -4.601602 | 0.659823  | -0.057725 |
| H | -1.522715 | 1.166044  | 1.330768  |
| C | -3.575625 | 1.285149  | 0.651396  |
| H | -5.577031 | 1.140857  | -0.152884 |
| H | -3.745791 | 2.258600  | 1.116820  |
| H | -5.168218 | -1.087052 | -1.197239 |

32

Figure\_S15-9\_dienoate / electronic energy: -841.927078481 a.u. / lowest freq: 24.55 cm-1

|   |           |           |           |
|---|-----------|-----------|-----------|
| C | -0.660544 | -0.726572 | 0.059153  |
| C | -1.860539 | -0.097447 | 0.115996  |
| H | -0.691600 | -1.818492 | -0.004770 |
| C | -1.976243 | 1.390665  | 0.160143  |
| C | -3.120576 | -0.891785 | 0.187355  |
| O | -3.041424 | 1.823605  | -0.507466 |
| O | -1.182749 | 2.134043  | 0.689285  |
| O | -4.147702 | -0.497504 | 0.683440  |
| O | -2.981802 | -2.118850 | -0.320932 |
| C | -4.097604 | -2.989729 | -0.195724 |
| H | -4.332384 | -3.170881 | 0.862818  |
| H | -3.810049 | -3.927003 | -0.683244 |
| H | -4.981752 | -2.562067 | -0.688186 |
| C | -3.254671 | 3.228152  | -0.535442 |
| H | -3.354009 | 3.627502  | 0.483524  |
| H | -4.184056 | 3.384216  | -1.092621 |

|   |           |           |           |
|---|-----------|-----------|-----------|
| H | -2.420438 | 3.737793  | -1.038016 |
| C | 0.656646  | -0.129211 | 0.062308  |
| H | 0.725624  | 0.955889  | 0.150505  |
| C | 1.759981  | -0.902956 | -0.019704 |
| H | 1.621029  | -1.988149 | -0.089650 |
| C | 3.156351  | -0.453635 | -0.025165 |
| C | 4.175093  | -1.416830 | -0.109525 |
| C | 3.522207  | 0.902114  | 0.053056  |
| C | 5.517020  | -1.042840 | -0.114390 |
| H | 3.907556  | -2.474776 | -0.172060 |
| C | 4.861836  | 1.275255  | 0.048166  |
| H | 2.754752  | 1.675486  | 0.118691  |
| C | 5.863995  | 0.305241  | -0.035401 |
| H | 6.294080  | -1.807149 | -0.179427 |
| H | 5.127957  | 2.332459  | 0.111300  |
| H | 6.914980  | 0.602284  | -0.038425 |

84

Figure\_S15-9\_9d(Naborate)-Cu-alleny1\_01 / electronic energy: -3556.59972133 a.u. / lowest freq: 6.98 cm<sup>-1</sup>

|    |           |           |           |
|----|-----------|-----------|-----------|
| Cu | -1.541487 | 0.512198  | 1.320622  |
| C  | -1.443241 | 0.280979  | 3.240199  |
| C  | -1.708543 | 0.570437  | -0.618345 |
| N  | -2.703782 | 0.006397  | -1.338605 |
| N  | -0.843137 | 1.117024  | -1.462725 |
| C  | 0.339276  | 1.860794  | -1.044976 |
| C  | -0.866615 | -0.748817 | 3.789649  |
| C  | -0.244212 | -1.818381 | 4.271722  |
| C  | -1.263213 | 1.024435  | -2.860798 |
| H  | -0.448075 | 0.654817  | -3.495763 |
| C  | -2.431137 | 0.039099  | -2.779181 |
| H  | -3.317691 | 0.367546  | -3.338046 |
| C  | -3.822522 | -0.654141 | -0.787344 |
| C  | -4.403465 | -1.736535 | -1.457185 |
| C  | -4.365970 | -0.218745 | 0.424395  |
| C  | -5.499456 | -2.405697 | -0.905083 |
| C  | -5.446625 | -0.887610 | 1.003749  |
| C  | -6.003346 | -1.977169 | 0.328370  |
| H  | -6.858359 | -2.499194 | 0.767305  |
| B  | 2.473873  | -0.386637 | -0.145228 |
| H  | -2.142357 | -0.960910 | -3.139177 |
| H  | -1.567888 | 2.017795  | -3.228704 |
| H  | 0.425750  | 1.661748  | 0.030454  |
| C  | 0.140518  | 3.351059  | -1.243250 |
| C  | 0.476012  | 4.004913  | -2.433813 |
| C  | -0.434299 | 4.096566  | -0.206338 |
| C  | 0.242521  | 5.372968  | -2.583343 |
| H  | 0.925428  | 3.449248  | -3.259815 |
| C  | -0.668240 | 5.461918  | -0.351779 |
| H  | -0.701300 | 3.593157  | 0.727484  |
| C  | -0.329858 | 6.104383  | -1.543760 |
| H  | 0.510325  | 5.868836  | -3.518935 |
| H  | -1.113929 | 6.027375  | 0.469545  |
| H  | -0.510495 | 7.175044  | -1.661573 |
| C  | 1.610315  | 1.285819  | -1.680398 |
| H  | 2.465187  | 1.898975  | -1.342081 |
| H  | 1.571928  | 1.385444  | -2.780192 |
| O  | 1.764330  | -0.050841 | -1.356561 |
| H  | -1.933974 | 0.981211  | 3.935554  |
| H  | 0.802960  | -1.764109 | 4.590003  |
| H  | -0.774863 | -2.762088 | 4.437032  |
| O  | 2.387136  | -1.895077 | -0.046317 |
| C  | 2.906397  | -2.746670 | -0.934513 |
| C  | 3.897792  | -2.382965 | -1.863522 |
| C  | 2.453604  | -4.077549 | -0.921881 |
| C  | 4.403362  | -3.329794 | -2.751874 |
| H  | 4.269923  | -1.358687 | -1.865609 |
| C  | 2.970192  | -5.015503 | -1.812820 |
| H  | 1.685663  | -4.362359 | -0.197613 |
| C  | 3.948234  | -4.649763 | -2.739127 |
| H  | 5.172444  | -3.027217 | -3.467572 |
| H  | 2.599853  | -6.043636 | -1.783062 |
| H  | 4.350998  | -5.383589 | -3.440445 |
| Na | 0.677439  | -1.839637 | 1.558925  |
| C  | -6.004871 | -0.406331 | 2.317499  |
| H  | -6.474223 | 0.583477  | 2.204724  |
| H  | -6.763194 | -1.097279 | 2.710266  |
| H  | -5.207093 | -0.305544 | 3.068762  |
| C  | -6.098484 | -3.596682 | -1.607543 |
| H  | -7.177639 | -3.675396 | -1.414521 |
| H  | -5.943910 | -3.542992 | -2.694327 |
| H  | -5.632951 | -4.530415 | -1.252957 |
| H  | -3.951281 | 0.663371  | 0.917027  |
| H  | -3.995152 | -2.078090 | -2.410284 |
| O  | 3.803496  | 0.174961  | -0.094134 |
| O  | 1.838245  | 0.061275  | 1.116929  |
| C  | 4.145657  | 0.442829  | 1.248766  |
| C  | 2.754008  | 0.810560  | 1.898020  |
| C  | 2.625168  | 0.410269  | 3.365027  |
| C  | 2.406023  | 2.296831  | 1.764430  |
| C  | 5.167494  | 1.574133  | 1.289393  |

|   |          |           |          |
|---|----------|-----------|----------|
| C | 4.768010 | -0.819633 | 1.861744 |
| H | 4.817042 | 2.449860  | 0.727323 |
| H | 6.111788 | 1.236674  | 0.836575 |
| H | 5.376533 | 1.881148  | 2.325737 |
| H | 4.046035 | -1.647362 | 1.882875 |
| H | 5.143830 | -0.646233 | 2.880947 |
| H | 5.612458 | -1.130820 | 1.228985 |
| H | 2.776998 | -0.668346 | 3.506644 |
| H | 1.618462 | 0.664090  | 3.730275 |
| H | 3.363129 | 0.942589  | 3.984708 |
| H | 2.524541 | 2.648090  | 0.730035 |
| H | 3.030419 | 2.926419  | 2.414920 |
| H | 1.354467 | 2.440249  | 2.056858 |

84

Figure\_S15-9\_9d(Naborate)-Cu-allenyl\_02 / electronic energy: -3556.59879587 a.u. / lowest freq: 11.93 cm-1

|    |           |           |           |
|----|-----------|-----------|-----------|
| H  | 0.580931  | -0.723113 | -5.771843 |
| Cu | 2.067226  | 0.780569  | -1.607415 |
| H  | 3.632288  | 0.721699  | -3.749757 |
| C  | 2.661345  | 0.338434  | -3.392942 |
| C  | 2.011812  | -0.397797 | -4.248386 |
| C  | 1.292777  | -1.160712 | -5.063373 |
| H  | 1.439359  | -2.245755 | -5.102156 |
| N  | 0.157987  | 1.558593  | 0.464784  |
| C  | 1.380105  | 1.127391  | 0.175998  |
| N  | 2.001011  | 0.810164  | 1.330094  |
| C  | -0.822399 | 1.998254  | -0.517386 |
| Na | -0.304550 | -1.205401 | -2.784307 |
| C  | -0.194521 | 1.379557  | 1.873759  |
| H  | -0.892479 | 0.531236  | 1.960230  |
| C  | 1.162498  | 1.065723  | 2.507801  |
| H  | 1.577719  | 1.908172  | 3.083199  |
| C  | 3.338042  | 0.361378  | 1.418144  |
| C  | 3.710178  | -0.544717 | 2.413845  |
| C  | 4.295210  | 0.820213  | 0.506943  |
| C  | 5.024768  | -1.015878 | 2.490772  |
| C  | 5.606531  | 0.343208  | 0.549754  |
| C  | 5.956911  | -0.572285 | 1.547869  |
| H  | 6.984373  | -0.943945 | 1.596614  |
| H  | 1.109441  | 0.191278  | 3.169515  |
| H  | -0.666022 | 2.283082  | 2.284060  |
| H  | -0.284946 | 1.996615  | -1.478510 |
| C  | -1.250005 | 3.425612  | -0.216027 |
| C  | -2.496960 | 3.746681  | 0.328391  |
| C  | -0.334717 | 4.457505  | -0.459831 |
| C  | -2.822422 | 5.074000  | 0.617810  |
| H  | -3.231245 | 2.965659  | 0.535664  |
| C  | -0.656058 | 5.780695  | -0.171635 |
| H  | 0.644620  | 4.214205  | -0.882091 |
| C  | -1.905208 | 6.092479  | 0.369709  |
| H  | -3.800771 | 5.308249  | 1.042882  |
| H  | 0.068677  | 6.572770  | -0.372287 |
| H  | -2.161048 | 7.130022  | 0.595429  |
| C  | -1.964832 | 0.994912  | -0.638933 |
| H  | -2.713806 | 1.402694  | -1.344059 |
| H  | -2.474947 | 0.895510  | 0.335185  |
| O  | -1.463435 | -0.224302 | -1.071300 |
| C  | 6.609576  | 0.810813  | -0.471895 |
| H  | 7.639797  | 0.598039  | -0.155311 |
| H  | 6.443024  | 0.304503  | -1.436186 |
| H  | 6.518580  | 1.891748  | -0.652649 |
| C  | 5.419133  | -1.975898 | 3.582782  |
| H  | 6.374853  | -2.469372 | 3.359456  |
| H  | 5.531985  | -1.448430 | 4.543409  |
| H  | 4.654491  | -2.753434 | 3.726049  |
| H  | 2.972159  | -0.908155 | 3.131169  |
| H  | 4.015455  | 1.567131  | -0.239355 |
| B  | -2.023918 | -1.469183 | -0.501618 |
| O  | -1.596695 | -1.746330 | 0.860817  |
| O  | -1.449708 | -2.543077 | -1.316357 |
| C  | -0.666389 | -2.812267 | 0.852190  |
| C  | -1.054814 | -3.595762 | -0.453026 |
| C  | 0.093035  | -4.365813 | -1.095427 |
| H  | -0.266361 | -4.894957 | -1.991022 |
| H  | 0.908603  | -3.695052 | -1.399436 |
| H  | 0.503060  | -5.114995 | -0.400969 |
| C  | -2.248143 | -4.531525 | -0.233803 |
| H  | -1.973103 | -5.416305 | 0.359240  |
| H  | -3.070016 | -4.005544 | 0.271988  |
| H  | -2.616392 | -4.872321 | -1.212772 |
| C  | 0.751840  | -2.240137 | 0.777317  |
| H  | 1.524582  | -3.019891 | 0.843478  |
| H  | 0.894245  | -1.549819 | 1.618810  |
| H  | 0.906232  | -1.665398 | -0.147125 |
| C  | -0.816573 | -3.618857 | 2.137507  |
| H  | -0.496994 | -3.011129 | 2.997847  |
| H  | -1.861479 | -3.912091 | 2.301762  |
| H  | -0.193464 | -4.526429 | 2.112926  |
| H  | -5.877697 | -1.031593 | -1.457222 |
| O  | -3.498415 | -1.446713 | -0.664050 |

|   |           |           |           |
|---|-----------|-----------|-----------|
| C | -5.731586 | -0.801612 | -0.399415 |
| C | -4.447650 | -0.993229 | 0.148935  |
| C | -6.781899 | -0.327595 | 0.380416  |
| C | -4.258183 | -0.697603 | 1.514324  |
| C | -6.586757 | -0.028328 | 1.730903  |
| H | -3.275736 | -0.865721 | 1.953875  |
| C | -5.319680 | -0.219773 | 2.282812  |
| H | -7.410304 | 0.345153  | 2.343139  |
| H | -5.148499 | 0.001290  | 3.340055  |
| H | -7.765815 | -0.187087 | -0.075149 |

84

Figure\_S15-9\_9d(Naborate)-Cu-allenyl\_03 / electronic energy: -3556.60003110 a.u. / lowest freq: 12.55 cm<sup>-1</sup>

|    |           |           |           |
|----|-----------|-----------|-----------|
| H  | 1.788044  | 1.466405  | 5.579331  |
| Cu | -1.195968 | 1.043557  | 1.948192  |
| H  | -1.965195 | 1.482422  | 4.427752  |
| C  | -1.061626 | 1.171742  | 3.874789  |
| C  | -0.025007 | 0.937774  | 4.626899  |
| C  | 1.070738  | 0.676946  | 5.330023  |
| H  | 1.254829  | -0.320890 | 5.743249  |
| N  | -0.438975 | 1.568413  | -0.794299 |
| C  | -1.324742 | 0.986218  | 0.006683  |
| N  | -2.239340 | 0.357256  | -0.761214 |
| C  | 0.702979  | 2.352060  | -0.340362 |
| Na | 1.851392  | -0.015497 | 2.739367  |
| C  | -0.709860 | 1.368358  | -2.217470 |
| H  | 0.152285  | 0.901805  | -2.714835 |
| C  | -1.928395 | 0.444068  | -2.193917 |
| H  | -2.788620 | 0.853263  | -2.743179 |
| C  | -3.364549 | -0.353571 | -0.295278 |
| C  | -3.981560 | -1.288976 | -1.132530 |
| C  | -3.888933 | -0.132036 | 0.983318  |
| C  | -5.081070 | -2.030059 | -0.690545 |
| C  | -4.976971 | -0.871746 | 1.448935  |
| C  | -5.561407 | -1.822193 | 0.605127  |
| H  | -6.413339 | -2.406797 | 0.963549  |
| H  | -1.691927 | -0.548891 | -2.600930 |
| H  | -0.911491 | 2.334381  | -2.704197 |
| H  | 0.528462  | 2.523559  | 0.733213  |
| C  | 0.702664  | 3.702298  | -1.036588 |
| C  | 1.543626  | 3.998553  | -2.113356 |
| C  | -0.217712 | 4.669326  | -0.614397 |
| C  | 1.469781  | 5.238912  | -2.750252 |
| H  | 2.264176  | 3.259741  | -2.470276 |
| C  | -0.295210 | 5.906401  | -1.248385 |
| H  | -0.885361 | 4.442645  | 0.221913  |
| C  | 0.551437  | 6.194742  | -2.320494 |
| H  | 2.134756  | 5.456322  | -3.588981 |
| H  | -1.017347 | 6.650119  | -0.904576 |
| H  | 0.493640  | 7.164304  | -2.819830 |
| C  | 2.017109  | 1.571128  | -0.439564 |
| H  | 2.842780  | 2.290641  | -0.286036 |
| H  | 2.146642  | 1.157743  | -1.455541 |
| O  | 2.072368  | 0.569579  | 0.520001  |
| C  | -5.516209 | -0.616275 | 2.832749  |
| H  | -6.242430 | -1.384670 | 3.130771  |
| H  | -4.705941 | -0.600340 | 3.576777  |
| H  | -6.021680 | 0.361162  | 2.881707  |
| C  | -5.733087 | -3.027639 | -1.612614 |
| H  | -6.366304 | -3.733519 | -1.057760 |
| H  | -6.370575 | -2.516559 | -2.351723 |
| H  | -4.982656 | -3.603887 | -2.173558 |
| H  | -3.588822 | -1.473777 | -2.132424 |
| H  | -3.454182 | 0.635082  | 1.627767  |
| B  | 2.250906  | -0.844472 | 0.117946  |
| O  | 2.770734  | -1.557861 | 1.299453  |
| O  | 3.242285  | -1.016082 | -0.912863 |
| C  | 4.125323  | -1.896643 | 1.052206  |
| C  | 4.145719  | -2.030592 | -0.513003 |
| C  | 5.504307  | -1.769775 | -1.152215 |
| H  | 5.434610  | -1.910996 | -2.241233 |
| H  | 5.841711  | -0.741906 | -0.964894 |
| H  | 6.263658  | -2.467833 | -0.767060 |
| C  | 3.611886  | -3.391156 | -0.979004 |
| H  | 4.323589  | -4.203905 | -0.770744 |
| H  | 2.654042  | -3.626956 | -0.493283 |
| H  | 3.437859  | -3.351559 | -2.064003 |
| C  | 5.024864  | -0.755222 | 1.542182  |
| H  | 6.092780  | -0.987192 | 1.418023  |
| H  | 4.845066  | -0.587589 | 2.615841  |
| H  | 4.799722  | 0.176378  | 1.004006  |
| C  | 4.470075  | -3.178699 | 1.800327  |
| H  | 4.461733  | -2.995537 | 2.885799  |
| H  | 3.741971  | -3.971375 | 1.585034  |
| H  | 5.474220  | -3.537458 | 1.526064  |
| H  | -1.152996 | -2.894884 | -0.099301 |
| O  | 0.898946  | -1.389653 | -0.167011 |
| C  | -0.756799 | -2.746624 | -1.106121 |
| C  | 0.388682  | -1.941095 | -1.257513 |
| C  | -1.381122 | -3.319521 | -2.209433 |

|   |           |           |           |
|---|-----------|-----------|-----------|
| C | 0.892062  | -1.740260 | -2.559044 |
| C | -0.886413 | -3.107080 | -3.498401 |
| H | 1.796678  | -1.147125 | -2.686275 |
| C | 0.254377  | -2.317092 | -3.656006 |
| H | -1.377196 | -3.555047 | -4.364821 |
| H | 0.662366  | -2.144835 | -4.655748 |
| H | -2.272517 | -3.933924 | -2.058422 |

84

Figure\_S15-9\_9d(Naborate)-Cu-allenyl\_04 / electronic energy: -3556.60702129 a.u. / lowest freq: 23.73 cm-1

|    |           |           |           |
|----|-----------|-----------|-----------|
| Cu | -1.211825 | 1.239513  | 1.303356  |
| C  | -0.964845 | 1.704515  | 3.165528  |
| C  | -1.323143 | 0.687489  | -0.560221 |
| N  | -2.347618 | 0.038683  | -1.150971 |
| N  | -0.331695 | 0.790621  | -1.436520 |
| C  | 0.898461  | 1.520033  | -1.143354 |
| C  | 0.018524  | 1.329638  | 3.932327  |
| C  | 1.050713  | 0.903209  | 4.651536  |
| C  | -0.654674 | 0.222883  | -2.746199 |
| H  | 0.143498  | -0.456843 | -3.070128 |
| C  | -1.963912 | -0.513486 | -2.454127 |
| H  | -2.744095 | -0.328612 | -3.204790 |
| C  | -3.566265 | -0.276070 | -0.520102 |
| C  | -4.283653 | -1.412318 | -0.901395 |
| C  | -4.074356 | 0.556237  | 0.484597  |
| C  | -5.477256 | -1.748668 | -0.254425 |
| C  | -5.256312 | 0.231626  | 1.150385  |
| C  | -5.946259 | -0.926510 | 0.773681  |
| H  | -6.876359 | -1.186961 | 1.286622  |
| B  | 2.597317  | -0.988766 | -0.510723 |
| H  | -1.802269 | -1.599001 | -2.364443 |
| H  | -0.780505 | 1.022890  | -3.493878 |
| H  | 1.100602  | 1.334571  | -0.081524 |
| C  | 0.722527  | 3.016943  | -1.319341 |
| C  | 0.571146  | 3.598157  | -2.584548 |
| C  | 0.682610  | 3.844697  | -0.191761 |
| C  | 0.379260  | 4.972810  | -2.716516 |
| H  | 0.603509  | 2.978048  | -3.483578 |
| C  | 0.493204  | 5.220360  | -0.320567 |
| H  | 0.791304  | 3.402448  | 0.802840  |
| C  | 0.339552  | 5.788054  | -1.584734 |
| H  | 0.261123  | 5.410857  | -3.710090 |
| H  | 0.464140  | 5.849831  | 0.571670  |
| H  | 0.188992  | 6.864626  | -1.689828 |
| C  | 2.095607  | 0.970163  | -1.926391 |
| H  | 2.975049  | 1.548641  | -1.586970 |
| H  | 1.965958  | 1.195620  | -2.999748 |
| O  | 2.279684  | -0.392260 | -1.794536 |
| H  | -1.716764 | 2.346356  | 3.655291  |
| H  | 1.967128  | 1.497205  | 4.739020  |
| H  | 0.990948  | -0.021381 | 5.236133  |
| O  | 1.312859  | -1.393464 | 0.202612  |
| C  | 0.424515  | -2.262619 | -0.280972 |
| C  | 0.631012  | -2.998942 | -1.461745 |
| C  | -0.770668 | -2.460111 | 0.433256  |
| C  | -0.332506 | -3.907229 | -1.896960 |
| H  | 1.556051  | -2.861276 | -2.020326 |
| C  | -1.723297 | -3.372494 | -0.010216 |
| H  | -0.943625 | -1.870850 | 1.337994  |
| C  | -1.514653 | -4.104693 | -1.181230 |
| H  | -0.151604 | -4.470926 | -2.815957 |
| H  | -2.646284 | -3.501798 | 0.559791  |
| H  | -2.263574 | -4.818892 | -1.529803 |
| Na | 1.634795  | -0.206231 | 2.148438  |
| C  | -5.788037 | 1.144749  | 2.224368  |
| H  | -6.219677 | 2.056893  | 1.782556  |
| H  | -6.574351 | 0.655534  | 2.815561  |
| H  | -4.986938 | 1.460700  | 2.908732  |
| C  | -6.213540 | -3.001996 | -0.650978 |
| H  | -7.190120 | -3.071987 | -0.153039 |
| H  | -6.378072 | -3.039483 | -1.738302 |
| H  | -5.632023 | -3.897875 | -0.380537 |
| H  | -3.551531 | 1.482163  | 0.736377  |
| H  | -3.899348 | -2.069178 | -1.683006 |
| O  | 3.524365  | -2.081184 | -0.688877 |
| O  | 3.224218  | -0.087812 | 0.475153  |
| C  | 4.547330  | -1.992537 | 0.278809  |
| C  | 4.593097  | -0.451600 | 0.591523  |
| C  | 5.094298  | -0.102061 | 1.987404  |
| C  | 5.396846  | 0.333138  | -0.450219 |
| C  | 5.844283  | -2.545736 | -0.303242 |
| C  | 4.148839  | -2.829044 | 1.502705  |
| H  | 6.079045  | -2.073119 | -1.265729 |
| H  | 5.742552  | -3.627785 | -0.473885 |
| H  | 6.687998  | -2.386907 | 0.386310  |
| H  | 3.225597  | -2.449985 | 1.963156  |
| H  | 4.939333  | -2.860071 | 2.266899  |
| H  | 3.947174  | -3.857884 | 1.170473  |
| H  | 4.466280  | -0.548244 | 2.770784  |
| H  | 5.092195  | 0.989578  | 2.127503  |

|   |          |           |           |
|---|----------|-----------|-----------|
| H | 6.124097 | -0.461090 | 2.134953  |
| H | 5.075546 | 0.075229  | -1.469390 |
| H | 6.477260 | 0.148174  | -0.361823 |
| H | 5.220843 | 1.408388  | -0.296041 |

84

Figure\_S15-9\_d(Naborate)-Cu-allenyl\_05 / electronic energy: -3556.59701117 a.u. / lowest freq: 13.81 cm<sup>-1</sup>

|    |           |           |           |
|----|-----------|-----------|-----------|
| H  | -2.290956 | -0.219092 | 3.771425  |
| C  | -1.542055 | -0.620520 | 3.066779  |
| Cu | -1.617169 | 0.027328  | 1.242204  |
| H  | 1.896846  | 2.336508  | 4.120856  |
| C  | -0.716270 | -1.484742 | 3.582877  |
| H  | 1.053819  | 0.362462  | 2.873524  |
| C  | 2.410422  | 2.014327  | 3.211189  |
| C  | 0.181788  | -2.353144 | 4.029706  |
| C  | 1.937936  | 0.900241  | 2.522921  |
| H  | -0.021182 | -3.429615 | 4.044658  |
| H  | 1.131641  | -2.011379 | 4.455845  |
| H  | 3.885238  | 3.601092  | 3.278400  |
| C  | 3.518755  | 2.722669  | 2.743271  |
| Na | 0.632564  | -2.332437 | 1.272400  |
| C  | 2.570126  | 0.460437  | 1.344960  |
| C  | 4.151355  | 2.285458  | 1.579185  |
| O  | 2.054508  | -0.606849 | 0.728389  |
| C  | 3.695952  | 1.166119  | 0.883437  |
| H  | 5.024379  | 2.823096  | 1.199835  |
| H  | 4.205485  | 0.812404  | -0.012327 |
| N  | -2.979158 | 0.482760  | -1.303631 |
| C  | -1.842647 | 0.649773  | -0.590157 |
| N  | -0.954466 | 1.265204  | -1.362671 |
| C  | 0.407125  | 1.590284  | -0.949649 |
| C  | -1.501833 | 1.645155  | -2.667542 |
| H  | -0.816256 | 1.377545  | -3.481697 |
| C  | -2.804532 | 0.848202  | -2.712179 |
| H  | -3.658739 | 1.434081  | -3.076166 |
| C  | -4.161471 | -0.108921 | -0.810106 |
| C  | -4.967788 | -0.880703 | -1.655628 |
| C  | -4.539199 | 0.083096  | 0.520102  |
| C  | -6.126990 | -1.486897 | -1.167767 |
| C  | -5.681581 | -0.537481 | 1.035066  |
| C  | -6.463666 | -1.317853 | 0.181734  |
| H  | -7.364722 | -1.799984 | 0.571701  |
| B  | 2.292127  | -1.158157 | -0.679634 |
| H  | -2.708771 | -0.056055 | -3.334232 |
| H  | -1.672455 | 2.732884  | -2.700200 |
| H  | 0.486372  | 1.204715  | 0.073845  |
| C  | 0.662582  | 3.083328  | -0.905589 |
| C  | 0.848763  | 3.843214  | -2.067545 |
| C  | 0.750795  | 3.722083  | 0.335824  |
| C  | 1.100846  | 5.212754  | -1.987693 |
| H  | 0.805509  | 3.367508  | -3.050146 |
| C  | 1.009400  | 5.089189  | 0.418911  |
| H  | 0.638498  | 3.133352  | 1.249754  |
| C  | 1.180992  | 5.839579  | -0.744198 |
| H  | 1.242796  | 5.790757  | -2.903532 |
| H  | 1.084977  | 5.567733  | 1.397839  |
| H  | 1.383331  | 6.911114  | -0.681545 |
| C  | 1.444372  | 0.827188  | -1.787633 |
| H  | 2.439583  | 1.226305  | -1.524050 |
| H  | 1.298655  | 1.059373  | -2.859290 |
| O  | 1.351941  | -0.542055 | -1.596919 |
| C  | -6.047644 | -0.339894 | 2.482587  |
| H  | -6.193144 | 0.727472  | 2.708699  |
| H  | -6.972572 | -0.872603 | 2.741847  |
| H  | -5.244691 | -0.705294 | 3.141187  |
| C  | -7.004749 | -2.314519 | -2.070531 |
| H  | -7.200971 | -3.303645 | -1.630603 |
| H  | -7.980464 | -1.826558 | -2.221103 |
| H  | -6.545415 | -2.462975 | -3.057334 |
| H  | -3.944253 | 0.736640  | 1.162315  |
| H  | -4.687712 | -1.027719 | -2.700266 |
| O  | 1.976949  | -2.587939 | -0.592515 |
| O  | 3.685434  | -1.077200 | -1.057843 |
| C  | 3.189855  | -3.319722 | -0.689611 |
| C  | 4.093823  | -2.346192 | -1.528682 |
| C  | 5.589678  | -2.513354 | -1.287329 |
| C  | 3.801718  | -2.439479 | -3.031811 |
| C  | 2.918676  | -4.661758 | -1.357916 |
| C  | 3.749959  | -3.545696 | 0.720186  |
| H  | 2.384368  | -4.531210 | -2.307905 |
| H  | 2.298839  | -5.292730 | -0.702355 |
| H  | 3.859361  | -5.199330 | -1.553443 |
| H  | 3.966411  | -2.586559 | 1.211915  |
| H  | 4.667391  | -4.152118 | 0.708726  |
| H  | 3.005895  | -4.086834 | 1.325660  |
| H  | 5.851333  | -2.289415 | -0.244721 |
| H  | 6.151185  | -1.821525 | -1.932908 |
| H  | 5.916856  | -3.538244 | -1.521962 |
| H  | 2.722420  | -2.368118 | -3.225441 |
| H  | 4.184743  | -3.372356 | -3.472015 |



H 4.293209 -1.593317 -3.534723

84

Figure\_S15-9\_d(Naborate)-Cu-alleny1\_06 / electronic energy: -3556.60439142 a.u. / lowest freq: 19.97 cm-1

H -1.883550 2.200903 4.067178  
 Cu -0.798297 1.561921 1.704095  
 C -1.340298 1.390722 3.553391  
 C -1.195239 0.292923 4.236973  
 C -1.008538 -0.860737 4.869381  
 H -1.748298 -1.666429 4.811728  
 H -0.148620 -1.013063 5.531913  
 Na 0.807960 -1.289977 2.798307  
 N -1.103958 1.363300 -1.223858  
 C -0.287791 1.595794 -0.173074  
 N 0.964797 1.594213 -0.612327  
 C 2.132450 1.788812 0.232908  
 C 1.087441 1.322583 -2.043617  
 H 1.746513 0.459615 -2.212459  
 C -0.359788 1.017900 -2.438308  
 H -0.710922 1.611506 -3.294176  
 C -2.507869 1.251229 -1.152409  
 C -3.200686 0.541822 -2.134142  
 C -3.221544 1.847570 -0.104974  
 C -4.587393 0.379455 -2.052140  
 C -4.600423 1.681556 0.004994  
 C -5.273461 0.940955 -0.974659  
 H -6.355366 0.802182 -0.893748  
 H -0.498857 -0.048844 -2.669060  
 H 1.502245 2.200272 -2.563567  
 H 1.726238 2.021464 1.229540  
 C 2.923886 2.993998 -0.252885  
 C 4.154298 2.883938 -0.906931  
 C 2.369388 4.268013 -0.073624  
 C 4.819402 4.023618 -1.365152  
 H 4.609593 1.905298 -1.069332  
 C 3.028307 5.405508 -0.531040  
 H 1.402861 4.363150 0.429743  
 C 4.259552 5.285357 -1.179418  
 H 5.781076 3.919795 -1.872467  
 H 2.581411 6.390688 -0.380254  
 H 4.779463 6.175833 -1.539413  
 C 2.950179 0.501244 0.378719  
 H 3.854541 0.753081 0.960879  
 H 3.292542 0.157135 -0.612558  
 O 2.252414 -0.503575 1.028224  
 C -5.343379 2.319762 1.150334  
 H -6.336334 1.868708 1.285713  
 H -4.785298 2.213321 2.092236  
 H -5.488068 3.397708 0.974052  
 C -5.304427 -0.411539 -3.113853  
 H -6.367901 -0.545072 -2.872445  
 H -5.238611 0.090462 -4.091870  
 H -4.849399 -1.407460 -3.226716  
 H -2.663749 0.063961 -2.953899  
 H -2.694063 2.447633 0.639358  
 B 1.515947 -1.568158 0.308743  
 O 1.717258 -2.806455 1.070331  
 O 1.944819 -1.843527 -1.032095  
 C 2.274145 -3.805245 0.237857  
 C 2.794749 -2.980433 -1.011410  
 C 4.243072 -2.506836 -0.836733  
 H 4.483919 -1.798173 -1.643395  
 H 4.376419 -1.989288 0.123399  
 H 4.959307 -3.339637 -0.888298  
 C 2.664584 -3.714111 -2.341694  
 H 3.246335 -4.648528 -2.336639  
 H 1.617423 -3.956995 -2.564904  
 H 3.047455 -3.078198 -3.153990  
 C 3.380349 -4.538878 0.994405  
 H 3.898435 -5.257978 0.341359  
 H 2.942963 -5.099587 1.834294  
 H 4.121044 -3.840096 1.404218  
 C 1.177428 -4.812836 -0.123160  
 H 0.756551 -5.223801 0.806952  
 H 0.358713 -4.334233 -0.675862  
 H 1.567904 -5.650402 -0.720065  
 H -2.155721 -1.084778 1.675523  
 O 0.091845 -1.136143 0.456419  
 C -2.193619 -1.604182 0.713811  
 C -1.013432 -1.697478 -0.044219  
 C -3.387073 -2.135864 0.236858  
 C -1.068019 -2.319017 -1.302282  
 C -3.432839 -2.778734 -1.001645  
 H -0.155661 -2.371415 -1.896136  
 C -2.268580 -2.858715 -1.764360  
 H -4.369303 -3.200021 -1.373137  
 H -2.290820 -3.346245 -2.742798  
 H -4.294654 -2.041567 0.838106

84

Figure\_S15-9\_d(Naborate)-Cu-alleny1\_07 / electronic energy: -3556.59700883 a.u. / lowest freq: 14.20 cm-1

|    |           |           |           |
|----|-----------|-----------|-----------|
| Cu | -1.615307 | 0.015206  | 1.240734  |
| C  | -1.536126 | -0.634821 | 3.064377  |
| C  | -1.846416 | 0.640390  | -0.590150 |
| N  | -2.983976 | 0.474046  | -1.302375 |
| N  | -0.959596 | 1.257194  | -1.363024 |
| C  | 0.400737  | 1.587233  | -0.949505 |
| C  | -0.707551 | -1.497613 | 3.578344  |
| C  | 0.193673  | -2.363870 | 4.022897  |
| C  | -1.508859 | 1.638831  | -2.666576 |
| H  | -0.823982 | 1.373279  | -3.481996 |
| C  | -2.810852 | 0.840841  | -2.710666 |
| H  | -3.665952 | 1.426216  | -3.073425 |
| C  | -4.165256 | -0.120036 | -0.809331 |
| C  | -4.980014 | -0.876006 | -1.656921 |
| C  | -4.535929 | 0.061712  | 0.526735  |
| C  | -6.142463 | -1.481179 | -1.168138 |
| C  | -5.678818 | -0.553738 | 1.040242  |
| C  | -6.472228 | -1.321287 | 0.181599  |
| H  | -7.377119 | -1.796012 | 0.571113  |
| B  | 2.300694  | -1.150745 | -0.682078 |
| H  | -2.715050 | -0.062974 | -3.333443 |
| H  | -1.680563 | 2.726453  | -2.697094 |
| H  | 0.481595  | 1.200073  | 0.073260  |
| C  | 0.648588  | 3.081497  | -0.902438 |
| C  | 0.836600  | 3.843562  | -2.062652 |
| C  | 0.726552  | 3.719474  | 0.340059  |
| C  | 1.080708  | 5.214391  | -1.980135 |
| H  | 0.801301  | 3.368510  | -3.045883 |
| C  | 0.977084  | 5.087907  | 0.425842  |
| H  | 0.612982  | 3.129119  | 1.252802  |
| C  | 1.150741  | 5.840390  | -0.735620 |
| H  | 1.224361  | 5.794093  | -2.894633 |
| H  | 1.044856  | 5.565921  | 1.405591  |
| H  | 1.346989  | 6.912924  | -0.670806 |
| C  | 1.441384  | 0.830476  | -1.788948 |
| H  | 2.434645  | 1.234962  | -1.526246 |
| H  | 1.293233  | 1.062333  | -2.860331 |
| O  | 1.356886  | -0.539408 | -1.598952 |
| H  | -2.285410 | -0.236411 | 3.770318  |
| H  | 1.142876  | -2.019710 | 4.448571  |
| H  | -0.005959 | -3.440979 | 4.036523  |
| O  | 2.059790  | -0.602004 | 0.726353  |
| C  | 2.568071  | 0.468125  | 1.344058  |
| C  | 3.688811  | 1.182607  | 0.883661  |
| C  | 1.932660  | 0.901690  | 2.522581  |
| C  | 4.135954  | 2.304195  | 1.581267  |
| H  | 4.201165  | 0.834185  | -0.012580 |
| C  | 2.396805  | 2.018109  | 3.212597  |
| H  | 1.052450  | 0.357057  | 2.872233  |
| C  | 3.500089  | 2.735081  | 2.745923  |
| H  | 5.005093  | 2.848768  | 1.202884  |
| H  | 1.880750  | 2.335114  | 4.122684  |
| H  | 3.860151  | 3.615342  | 3.282399  |
| Na | 0.644070  | -2.334939 | 1.266556  |
| C  | -6.042290 | -0.363094 | 2.489431  |
| H  | -6.191403 | 0.702816  | 2.720143  |
| H  | -6.964830 | -0.900018 | 2.748553  |
| H  | -5.236789 | -0.728263 | 3.144934  |
| C  | -6.998159 | -2.320829 | -2.081086 |
| H  | -7.992784 | -2.496391 | -1.648945 |
| H  | -7.127130 | -1.840284 | -3.061925 |
| H  | -6.531678 | -3.303216 | -2.257157 |
| H  | -3.935906 | 0.708756  | 1.170796  |
| H  | -4.709260 | -1.012576 | -2.705682 |
| O  | 1.993483  | -2.582289 | -0.595935 |
| O  | 3.693522  | -1.061640 | -1.059755 |
| C  | 3.210674  | -3.307090 | -0.691088 |
| C  | 4.110258  | -2.328512 | -1.529075 |
| C  | 5.606700  | -2.486435 | -1.285089 |
| C  | 3.821353  | -2.424410 | -3.032636 |
| C  | 2.948020  | -4.650825 | -1.359422 |
| C  | 3.770085  | -3.529842 | 0.719500  |
| H  | 2.414311  | -4.523590 | -2.310183 |
| H  | 2.330716  | -5.284938 | -0.704506 |
| H  | 3.891924  | -5.183293 | -1.553374 |
| H  | 3.980209  | -2.569566 | 1.211744  |
| H  | 4.691192  | -4.130682 | 0.709103  |
| H  | 3.028544  | -4.075617 | 1.323896  |
| H  | 5.865208  | -2.260493 | -0.242123 |
| H  | 6.164983  | -1.791348 | -1.929961 |
| H  | 5.940647  | -3.509335 | -1.518836 |
| H  | 2.742001  | -2.359676 | -3.228329 |
| H  | 4.210624  | -3.355294 | -3.471585 |
| H  | 4.308720  | -1.575684 | -3.535227 |

116

Figure\_S15-9\_PA-9b(Naborate)-ts(1,6major)\_01 / electronic energy: -4398.56325172 a.u. / lowest freq: -433.67 cm<sup>-1</sup>

|   |          |          |           |
|---|----------|----------|-----------|
| H | 5.797940 | 2.532949 | 0.596683  |
| H | 6.963864 | 3.051104 | -1.899424 |
| H | 4.704182 | 2.588892 | -1.456197 |

|    |           |           |           |
|----|-----------|-----------|-----------|
| H  | 9.243414  | 2.365363  | -2.578522 |
| C  | 7.185485  | 1.992191  | -2.058303 |
| C  | 4.820159  | 1.501774  | -1.468964 |
| C  | 8.469503  | 1.607186  | -2.439232 |
| C  | 6.169159  | 1.042761  | -1.874278 |
| C  | 8.764441  | 0.259393  | -2.641663 |
| H  | 9.770085  | -0.046006 | -2.938646 |
| C  | 6.480921  | -0.310027 | -2.079656 |
| C  | 7.763505  | -0.696598 | -2.459469 |
| H  | 5.717070  | -1.074501 | -1.933309 |
| H  | 7.983070  | -1.755376 | -2.614234 |
| H  | 2.438478  | 2.469411  | -1.445404 |
| C  | 2.401070  | 1.384218  | -1.570359 |
| C  | 3.656844  | 0.768668  | -1.698867 |
| H  | 3.714699  | -0.294662 | -1.919598 |
| Cu | 1.507608  | 0.800125  | 0.251881  |
| H  | 2.320983  | 1.584188  | 2.613719  |
| C  | 2.816334  | 1.503532  | 1.645373  |
| C  | 4.036234  | 1.601539  | 1.319164  |
| C  | 5.249099  | 1.594260  | 0.710811  |
| H  | 5.864106  | 0.693390  | 0.802860  |
| N  | -1.026655 | 0.400537  | 1.792347  |
| C  | 0.187997  | -0.034738 | 1.493140  |
| N  | 0.505244  | -1.020444 | 2.363082  |
| C  | -1.679766 | 1.539683  | 1.163268  |
| O  | -1.098164 | 1.745558  | -2.486599 |
| C  | -0.002847 | 1.892539  | -1.972662 |
| C  | 1.067162  | 0.888066  | -1.849207 |
| C  | 0.755689  | -0.473962 | -2.291986 |
| O  | -0.325745 | -0.878846 | -2.688079 |
| Na | -2.439204 | -0.111997 | -2.458558 |
| C  | -1.659965 | -0.334294 | 2.892038  |
| H  | -2.474603 | -0.953758 | 2.485630  |
| C  | -0.497912 | -1.172478 | 3.423451  |
| H  | -0.106956 | -0.783907 | 4.377396  |
| C  | 1.709463  | -1.750512 | 2.359546  |
| C  | 2.216392  | -2.261967 | 3.557834  |
| C  | 2.402592  | -1.972775 | 1.164723  |
| C  | 3.428201  | -2.959665 | 3.579132  |
| C  | 3.622301  | -2.650087 | 1.169806  |
| C  | 4.126227  | -3.133691 | 2.381732  |
| H  | 5.082603  | -3.664722 | 2.390182  |
| H  | -0.759283 | -2.231265 | 3.562096  |
| H  | -2.057864 | 0.362722  | 3.643188  |
| O  | 1.789937  | -1.322322 | -2.201774 |
| O  | 0.325697  | 3.069818  | -1.413527 |
| C  | -0.638959 | 4.110192  | -1.475433 |
| H  | -1.559434 | 3.823064  | -0.946855 |
| H  | -0.182540 | 4.974211  | -0.981411 |
| H  | -0.884938 | 4.353105  | -2.518214 |
| C  | 1.538111  | -2.676445 | -2.555045 |
| H  | 0.794126  | -3.118315 | -1.877999 |
| H  | 2.495572  | -3.197444 | -2.453929 |
| H  | 1.173497  | -2.751001 | -3.588143 |
| H  | -1.107974 | 1.729853  | 0.247704  |
| C  | -1.567424 | 2.770362  | 2.048398  |
| C  | -2.580522 | 3.161824  | 2.929091  |
| C  | -0.381326 | 3.515127  | 2.011813  |
| C  | -2.408999 | 4.272196  | 3.758101  |
| H  | -3.518394 | 2.604533  | 2.977122  |
| C  | -0.207111 | 4.621762  | 2.838485  |
| H  | 0.414178  | 3.218507  | 1.322020  |
| C  | -1.223161 | 5.002934  | 3.716930  |
| H  | -3.209278 | 4.565736  | 4.440857  |
| H  | 0.725013  | 5.189431  | 2.795241  |
| H  | -1.090477 | 5.870677  | 4.366709  |
| C  | -3.102147 | 1.195727  | 0.726247  |
| H  | -3.565954 | 2.126491  | 0.344385  |
| H  | -3.711022 | 0.880817  | 1.592180  |
| O  | -3.071367 | 0.214200  | -0.250899 |
| C  | 4.369762  | -2.887830 | -0.115225 |
| H  | 5.448935  | -2.721817 | 0.015765  |
| H  | 4.236634  | -3.924519 | -0.463539 |
| H  | 4.009647  | -2.218049 | -0.906763 |
| C  | 3.966447  | -3.521524 | 4.869366  |
| H  | 5.054835  | -3.382583 | 4.941202  |
| H  | 3.500524  | -3.046144 | 5.743557  |
| H  | 3.770177  | -4.603731 | 4.934819  |
| H  | 1.681928  | -2.101669 | 4.495436  |
| H  | 1.987152  | -1.622060 | 0.218058  |
| B  | -3.955752 | -0.968938 | -0.157641 |
| O  | -3.561335 | -1.948622 | 0.837021  |
| O  | -3.801069 | -1.636254 | -1.455632 |
| C  | -2.944746 | -3.043413 | 0.190100  |
| C  | -3.614876 | -3.023493 | -1.233659 |
| C  | -2.741031 | -3.593031 | -2.346054 |
| H  | -3.280017 | -3.546882 | -3.304995 |
| H  | -1.805361 | -3.026327 | -2.451580 |
| H  | -2.492660 | -4.647672 | -2.150344 |

|   |           |           |           |
|---|-----------|-----------|-----------|
| C | -4.985543 | -3.707657 | -1.243293 |
| H | -4.900788 | -4.800419 | -1.148349 |
| H | -5.616383 | -3.327717 | -0.427397 |
| H | -5.487906 | -3.481155 | -2.195588 |
| C | -1.430980 | -2.807110 | 0.117846  |
| H | -0.903506 | -3.665260 | -0.325062 |
| H | -1.042361 | -2.669058 | 1.135456  |
| H | -1.191603 | -1.904243 | -0.461136 |
| C | -3.214393 | -4.312965 | 0.990678  |
| H | -2.697577 | -4.255947 | 1.960973  |
| H | -4.286877 | -4.439776 | 1.186406  |
| H | -2.843171 | -5.203759 | 0.460490  |
| H | -4.610150 | 1.252894  | -1.676818 |
| O | -5.347213 | -0.579939 | 0.160886  |
| C | -5.680666 | 1.082496  | -1.571193 |
| C | -6.139906 | 0.144820  | -0.625528 |
| C | -6.584975 | 1.809712  | -2.344734 |
| C | -7.531013 | -0.022198 | -0.484538 |
| C | -7.960883 | 1.633784  | -2.200219 |
| H | -7.887528 | -0.748057 | 0.249610  |
| C | -8.424465 | 0.712031  | -1.258077 |
| H | -8.661643 | 2.208738  | -2.809070 |
| H | -9.498682 | 0.558890  | -1.125271 |
| H | -6.201335 | 2.532592  | -3.069896 |

116

Figure\_S15-9\_PA-9b(Naborate)-ts(1,6major)\_02 / electronic energy: -4398.56128250 a.u. / lowest freq: -438.38 cm<sup>-1</sup>

|    |           |           |           |
|----|-----------|-----------|-----------|
| H  | 5.740831  | 2.642307  | 0.738122  |
| H  | 7.367429  | 2.508999  | -1.628147 |
| H  | 5.048800  | 2.181854  | -1.437421 |
| H  | 9.696529  | 1.673001  | -1.690672 |
| C  | 7.567459  | 1.449991  | -1.443307 |
| C  | 5.117458  | 1.126736  | -1.159469 |
| C  | 8.879319  | 0.980316  | -1.477446 |
| C  | 6.495819  | 0.584356  | -1.178781 |
| C  | 9.146540  | -0.367690 | -1.241496 |
| H  | 10.173221 | -0.739227 | -1.267111 |
| C  | 6.779959  | -0.768923 | -0.939499 |
| C  | 8.089838  | -1.239378 | -0.971176 |
| H  | 5.970473  | -1.464352 | -0.714922 |
| H  | 8.287337  | -2.296914 | -0.781998 |
| H  | 2.818028  | 2.057773  | -1.831034 |
| C  | 2.756510  | 0.975858  | -1.689168 |
| C  | 3.986890  | 0.353713  | -1.420069 |
| H  | 4.040234  | -0.730950 | -1.359180 |
| Cu | 1.514966  | 0.858241  | 0.010365  |
| H  | 1.907128  | 2.209168  | 2.218633  |
| C  | 2.571226  | 1.893500  | 1.413089  |
| C  | 3.833666  | 1.914699  | 1.313034  |
| C  | 5.137472  | 1.760319  | 0.970054  |
| H  | 5.682339  | 0.912378  | 1.397191  |
| N  | -1.281228 | 0.828615  | 1.073422  |
| C  | -0.048199 | 0.350254  | 1.140821  |
| N  | 0.056906  | -0.374441 | 2.278202  |
| C  | -1.764048 | 1.749812  | 0.054646  |
| O  | -0.502443 | 1.078368  | -3.303184 |
| C  | 0.493805  | 1.356053  | -2.658715 |
| C  | 1.478820  | 0.419939  | -2.090695 |
| C  | 1.197889  | -1.011740 | -2.235007 |
| O  | 0.196990  | -1.510579 | -2.723499 |
| Na | -1.903678 | -0.729760 | -3.108470 |
| C  | -2.145066 | 0.375437  | 2.167366  |
| H  | -2.865043 | -0.357331 | 1.770559  |
| C  | -1.136613 | -0.258074 | 3.124024  |
| H  | -0.927245 | 0.384467  | 3.994397  |
| C  | 1.210192  | -1.064392 | 2.697710  |
| C  | 1.454609  | -1.248317 | 4.059280  |
| C  | 2.110594  | -1.580959 | 1.756544  |
| C  | 2.610504  | -1.909598 | 4.493641  |
| C  | 3.273038  | -2.227357 | 2.170291  |
| C  | 3.513664  | -2.382403 | 3.542040  |
| H  | 4.423112  | -2.892913 | 3.871477  |
| H  | -1.453577 | -1.244964 | 3.490096  |
| H  | -2.683100 | 1.222637  | 2.615392  |
| O  | 2.159042  | -1.802145 | -1.734622 |
| O  | 0.774269  | 2.639375  | -2.373461 |
| C  | -0.124672 | 3.623865  | -2.862596 |
| H  | -1.124919 | 3.490190  | -2.425610 |
| H  | 0.288419  | 4.589225  | -2.552124 |
| H  | -0.202149 | 3.574928  | -3.957224 |
| C  | 1.930031  | -3.203862 | -1.793704 |
| H  | 1.049678  | -3.476947 | -1.195686 |
| H  | 2.827099  | -3.674200 | -1.378134 |
| H  | 1.776350  | -3.531844 | -2.830388 |
| H  | -1.015002 | 1.709891  | -0.743953 |
| C  | -1.796823 | 3.168376  | 0.599100  |
| C  | -2.955401 | 3.750460  | 1.123122  |
| C  | -0.604036 | 3.903017  | 0.620352  |
| C  | -2.919267 | 5.039282  | 1.659580  |
| H  | -3.901324 | 3.204417  | 1.118960  |

|   |           |           |           |
|---|-----------|-----------|-----------|
| C | -0.565290 | 5.187532  | 1.155572  |
| H | 0.306174  | 3.456247  | 0.209573  |
| C | -1.726450 | 5.759455  | 1.679136  |
| H | -3.831927 | 5.480659  | 2.065860  |
| H | 0.374341  | 5.744281  | 1.162545  |
| H | -1.700114 | 6.766362  | 2.101341  |
| C | -3.080185 | 1.262940  | -0.546990 |
| H | -3.429698 | 2.035290  | -1.258655 |
| H | -3.851134 | 1.199147  | 0.240327  |
| O | -2.883843 | 0.042965  | -1.172485 |
| C | 4.237545  | -2.787741 | 1.159589  |
| H | 5.280110  | -2.599423 | 1.454520  |
| H | 4.115938  | -3.878256 | 1.060523  |
| H | 4.071049  | -2.340281 | 0.170895  |
| C | 2.865391  | -2.080667 | 5.968700  |
| H | 3.780311  | -2.659212 | 6.154906  |
| H | 2.976137  | -1.103485 | 6.463834  |
| H | 2.026078  | -2.598839 | 6.457088  |
| H | 0.754976  | -0.861727 | 4.802429  |
| H | 1.898455  | -1.489394 | 0.689653  |
| B | -3.833387 | -1.077878 | -0.997761 |
| O | -3.700102 | -1.785379 | 0.267737  |
| O | -3.447942 | -2.047800 | -2.024889 |
| C | -2.979940 | -2.983456 | 0.053307  |
| C | -3.341762 | -3.331815 | -1.435724 |
| C | -2.272169 | -4.131756 | -2.171377 |
| H | -2.608168 | -4.348224 | -3.197256 |
| H | -1.327296 | -3.574420 | -2.232817 |
| H | -2.083379 | -5.093154 | -1.668857 |
| C | -4.696392 | -4.037627 | -1.552213 |
| H | -4.655256 | -5.072048 | -1.179762 |
| H | -5.469565 | -3.490341 | -0.994357 |
| H | -4.993460 | -4.062628 | -2.611110 |
| C | -1.480130 | -2.720018 | 0.235107  |
| H | -0.892056 | -3.645487 | 0.143415  |
| H | -1.307944 | -2.316958 | 1.241897  |
| H | -1.108471 | -1.986478 | -0.493860 |
| C | -3.432687 | -4.023496 | 1.071992  |
| H | -3.127021 | -3.710373 | 2.082171  |
| H | -4.524532 | -4.136395 | 1.069052  |
| H | -2.974559 | -5.003800 | 0.868263  |
| H | -7.291010 | 0.617109  | -2.079715 |
| O | -5.211882 | -0.593709 | -1.252438 |
| C | -7.217816 | 0.582980  | -0.990259 |
| C | -6.104790 | -0.067289 | -0.420708 |
| C | -8.192673 | 1.170252  | -0.189819 |
| C | -6.014359 | -0.116087 | 0.985398  |
| C | -8.090846 | 1.130336  | 1.202997  |
| H | -5.176046 | -0.643144 | 1.438560  |
| C | -6.996278 | 0.481582  | 1.775132  |
| H | -8.854693 | 1.593720  | 1.830927  |
| H | -6.901291 | 0.430238  | 2.863394  |
| H | -9.043724 | 1.668706  | -0.661684 |

116

Figure\_S15-9\_PA-9b(Naborate)-ts(1,6major)\_03 / electronic energy: -4398.56061938 a.u. / lowest freq: -437.49 cm-1

|    |           |           |           |
|----|-----------|-----------|-----------|
| H  | -5.772804 | -1.897057 | 1.824301  |
| H  | -6.914458 | -3.679267 | -0.126138 |
| H  | -4.678540 | -2.974901 | 0.081395  |
| H  | -9.181570 | -3.499135 | -1.107567 |
| C  | -7.149904 | -2.850022 | -0.798831 |
| C  | -4.811750 | -2.053691 | -0.491961 |
| C  | -8.426063 | -2.748535 | -1.349980 |
| C  | -6.156861 | -1.904619 | -1.095228 |
| C  | -8.736773 | -1.693615 | -2.207400 |
| H  | -9.735671 | -1.610627 | -2.640925 |
| C  | -6.484684 | -0.847100 | -1.957606 |
| C  | -7.759232 | -0.743009 | -2.507389 |
| H  | -5.738545 | -0.089302 | -2.198583 |
| H  | -7.992231 | 0.088069  | -3.176878 |
| H  | -2.407045 | -2.789892 | 0.055832  |
| C  | -2.392316 | -1.934690 | -0.624763 |
| C  | -3.658753 | -1.517226 | -1.064423 |
| H  | -3.735771 | -0.732155 | -1.813092 |
| Cu | -1.544134 | -0.441988 | 0.614496  |
| H  | -2.409025 | 0.178506  | 3.006488  |
| C  | -2.878296 | -0.299249 | 2.145600  |
| C  | -4.082413 | -0.623509 | 1.923066  |
| C  | -5.277762 | -1.013499 | 1.411708  |
| H  | -5.944324 | -0.240405 | 1.016792  |
| N  | 0.941471  | 0.665500  | 1.780606  |
| C  | -0.216759 | 0.933540  | 1.196045  |
| N  | -0.424972 | 2.269526  | 1.269333  |
| C  | 1.499411  | -0.671198 | 1.937257  |
| O  | 1.125028  | -2.629577 | -1.232616 |
| C  | 0.027161  | -2.524334 | -0.715073 |
| C  | -1.065418 | -1.621240 | -1.117279 |
| C  | -0.775484 | -0.659679 | -2.186450 |
| O  | 0.308891  | -0.458692 | -2.708427 |
| Na | 2.425153  | -0.928815 | -2.061494 |

|   |           |           |           |
|---|-----------|-----------|-----------|
| C | 1.640938  | 1.847156  | 2.288961  |
| H | 2.576534  | 1.996057  | 1.725980  |
| C | 0.612106  | 2.951962  | 2.052947  |
| H | 0.190094  | 3.331668  | 2.995972  |
| C | -1.565046 | 2.958447  | 0.809906  |
| C | -1.847774 | 4.233603  | 1.311289  |
| C | -2.424354 | 2.395263  | -0.142604 |
| C | -2.989652 | 4.930975  | 0.900817  |
| C | -3.580901 | 3.062921  | -0.541550 |
| C | -3.854889 | 4.330080  | -0.013607 |
| H | -4.758969 | 4.858846  | -0.329084 |
| H | 1.019108  | 3.805988  | 1.492402  |
| H | 1.880617  | 1.719118  | 3.354487  |
| O | -1.838423 | 0.067905  | -2.558950 |
| O | -0.284405 | -3.269378 | 0.359552  |
| C | 0.708935  | -4.164206 | 0.838542  |
| H | 1.616019  | -3.618468 | 1.137026  |
| H | 0.271150  | -4.661292 | 1.710325  |
| H | 0.974374  | -4.903439 | 0.070664  |
| C | -1.610435 | 1.090870  | -3.519260 |
| H | -0.915231 | 1.844853  | -3.123482 |
| H | -2.586912 | 1.547852  | -3.711463 |
| H | -1.199262 | 0.671924  | -4.447168 |
| H | 0.928230  | -1.298670 | 1.244274  |
| C | 1.269653  | -1.205687 | 3.339932  |
| C | 2.179223  | -0.995231 | 4.382043  |
| C | 0.086234  | -1.904633 | 3.609626  |
| C | 1.908491  | -1.470132 | 5.666200  |
| H | 3.114135  | -0.460773 | 4.200981  |
| C | -0.187566 | -2.377049 | 4.891097  |
| H | -0.629644 | -2.078826 | 2.801351  |
| C | 0.725033  | -2.159850 | 5.924451  |
| H | 2.630456  | -1.300353 | 6.467934  |
| H | -1.116916 | -2.918020 | 5.082095  |
| H | 0.515319  | -2.532080 | 6.929593  |
| C | 2.953711  | -0.704684 | 1.472485  |
| H | 3.330520  | -1.737443 | 1.617957  |
| H | 3.579651  | -0.055185 | 2.110281  |
| O | 3.013274  | -0.305636 | 0.149292  |
| C | -4.534699 | 2.422332  | -1.514407 |
| H | -5.473617 | 2.144028  | -1.010205 |
| H | -4.794476 | 3.107195  | -2.335153 |
| H | -4.104124 | 1.509212  | -1.945747 |
| C | -3.263800 | 6.316540  | 1.425661  |
| H | -4.342452 | 6.493835  | 1.541396  |
| H | -2.780121 | 6.483958  | 2.398127  |
| H | -2.878923 | 7.077882  | 0.728083  |
| H | -1.186745 | 4.700651  | 2.041625  |
| H | -2.193833 | 1.430641  | -0.595265 |
| B | 4.184048  | 0.466204  | -0.311711 |
| O | 4.319898  | 1.737197  | 0.371756  |
| O | 3.928376  | 0.788263  | -1.723242 |
| C | 4.449032  | 2.754864  | -0.604624 |
| C | 3.622878  | 2.172240  | -1.805788 |
| C | 2.112679  | 2.362772  | -1.606634 |
| H | 1.566159  | 1.767070  | -2.353151 |
| H | 1.806000  | 2.007750  | -0.613111 |
| H | 1.808071  | 3.413382  | -1.722853 |
| C | 4.032994  | 2.696227  | -3.175637 |
| H | 3.913055  | 3.789173  | -3.232195 |
| H | 5.077178  | 2.444363  | -3.401773 |
| H | 3.397146  | 2.246579  | -3.953685 |
| C | 3.906084  | 4.065895  | -0.048563 |
| H | 3.904842  | 4.851230  | -0.819778 |
| H | 4.536801  | 4.407452  | 0.785834  |
| H | 2.881762  | 3.948231  | 0.327181  |
| C | 5.932334  | 2.925409  | -0.956285 |
| H | 6.492388  | 3.118081  | -0.029410 |
| H | 6.334049  | 2.009536  | -1.411607 |
| H | 6.099040  | 3.768070  | -1.643930 |
| H | 3.836549  | -2.463375 | -0.445621 |
| O | 5.431966  | -0.318752 | -0.154046 |
| C | 4.785946  | -2.495794 | -0.981157 |
| C | 5.682121  | -1.413361 | -0.877357 |
| C | 5.109345  | -3.613903 | -1.750846 |
| C | 6.914136  | -1.509417 | -1.549548 |
| C | 6.330261  | -3.694860 | -2.419770 |
| H | 7.613731  | -0.675111 | -1.462770 |
| C | 7.232773  | -2.634582 | -2.305204 |
| H | 6.579807  | -4.574564 | -3.016730 |
| H | 8.197663  | -2.681651 | -2.816704 |
| H | 4.392029  | -4.436394 | -1.816269 |

116

Figure\_S15-9\_PA-9b(Naborate)-ts(1,6major)\_04 / electronic energy: -4398.56064928 a.u. / lowest freq: -431.71 cm<sup>-1</sup>

|   |           |          |          |
|---|-----------|----------|----------|
| H | -5.600828 | 3.180922 | 0.402947 |
| H | -7.564720 | 1.530238 | 2.046290 |
| H | -5.198214 | 1.663359 | 2.060578 |
| H | -9.690264 | 0.481019 | 1.327931 |
| C | -7.545200 | 0.688037 | 1.349338 |

|    |           |           |           |
|----|-----------|-----------|-----------|
| C  | -5.060237 | 0.870714  | 1.321636  |
| C  | -8.741640 | 0.098077  | 0.944799  |
| C  | -6.311735 | 0.215500  | 0.878104  |
| C  | -8.727767 | -0.975405 | 0.054773  |
| H  | -9.663754 | -1.437235 | -0.266559 |
| C  | -6.311700 | -0.865595 | -0.017256 |
| C  | -7.506075 | -1.453460 | -0.424221 |
| H  | -5.368491 | -1.240772 | -0.420126 |
| H  | -7.483486 | -2.289808 | -1.127146 |
| H  | -2.881952 | 1.729538  | 2.454202  |
| C  | -2.715988 | 0.759644  | 1.978537  |
| C  | -3.842434 | 0.188089  | 1.362212  |
| H  | -3.749144 | -0.775429 | 0.865091  |
| Cu | -1.531746 | 1.068320  | 0.291757  |
| H  | -1.747281 | 3.222907  | -1.171766 |
| C  | -2.473475 | 2.646438  | -0.597217 |
| C  | -3.732238 | 2.711022  | -0.487311 |
| C  | -5.044880 | 2.480199  | -0.226096 |
| H  | -5.634537 | 1.960647  | -0.987089 |
| N  | 1.135816  | 0.925224  | -1.055007 |
| C  | -0.125975 | 0.518050  | -0.988660 |
| N  | -0.380391 | -0.258071 | -2.052079 |
| C  | 1.767249  | 1.772319  | -0.050480 |
| O  | 0.628753  | 0.700294  | 3.430124  |
| C  | -0.432188 | 1.041822  | 2.934092  |
| C  | -1.413129 | 0.186996  | 2.251222  |
| C  | -1.072193 | -1.229349 | 2.085395  |
| O  | -0.024344 | -1.766004 | 2.413010  |
| Na | 2.069652  | -0.961646 | 2.816525  |
| C  | 1.855640  | 0.385693  | -2.216057 |
| H  | 2.619981  | -0.328935 | -1.872378 |
| C  | 0.732261  | -0.301013 | -3.005832 |
| H  | 0.458749  | 0.243079  | -3.924224 |
| C  | -1.645887 | -0.862161 | -2.296778 |
| C  | -2.721960 | -0.076862 | -2.704302 |
| C  | -1.804613 | -2.233217 | -2.096556 |
| C  | -3.980673 | -0.651579 | -2.901197 |
| C  | -3.050782 | -2.833900 | -2.292333 |
| C  | -4.123610 | -2.027020 | -2.690793 |
| H  | -5.106039 | -2.486896 | -2.838132 |
| H  | 0.977936  | -1.335606 | -3.285532 |
| H  | 2.336648  | 1.192125  | -2.787822 |
| O  | -2.042252 | -1.947535 | 1.512228  |
| O  | -0.790604 | 2.337908  | 2.943308  |
| C  | 0.104022  | 3.250745  | 3.561278  |
| H  | 1.082428  | 3.239619  | 3.059540  |
| H  | -0.356831 | 4.238998  | 3.459272  |
| H  | 0.245179  | 3.006689  | 4.623234  |
| C  | -1.795711 | -3.330040 | 1.315046  |
| H  | -0.914325 | -3.482948 | 0.678086  |
| H  | -2.690015 | -3.728217 | 0.823812  |
| H  | -1.634047 | -3.839187 | 2.275378  |
| H  | 1.123783  | 1.695831  | 0.837159  |
| C  | 1.789763  | 3.224866  | -0.488359 |
| C  | 2.759558  | 3.722853  | -1.366730 |
| C  | 0.787930  | 4.089502  | -0.032410 |
| C  | 2.718220  | 5.052192  | -1.787957 |
| H  | 3.562237  | 3.074592  | -1.726575 |
| C  | 0.744801  | 5.418369  | -0.450696 |
| H  | 0.026749  | 3.711108  | 0.655684  |
| C  | 1.710219  | 5.902554  | -1.333759 |
| H  | 3.481009  | 5.425301  | -2.474884 |
| H  | -0.045307 | 6.077733  | -0.084715 |
| H  | 1.679297  | 6.942967  | -1.664658 |
| C  | 3.135528  | 1.228363  | 0.355623  |
| H  | 3.578494  | 1.945870  | 1.072632  |
| H  | 3.807708  | 1.217264  | -0.520253 |
| O  | 2.989607  | -0.033057 | 0.910487  |
| C  | -3.245866 | -4.312131 | -2.076681 |
| H  | -4.076042 | -4.504777 | -1.380022 |
| H  | -3.492594 | -4.817987 | -3.022934 |
| H  | -2.340659 | -4.783353 | -1.669676 |
| C  | -5.151122 | 0.186285  | -3.343668 |
| H  | -6.052238 | -0.050549 | -2.758337 |
| H  | -4.938645 | 1.258586  | -3.232191 |
| H  | -5.388373 | -0.000913 | -4.402893 |
| H  | -2.575476 | 0.995200  | -2.844576 |
| H  | -0.948085 | -2.825360 | -1.767296 |
| B  | 3.973274  | -1.107884 | 0.655338  |
| O  | 3.808364  | -1.781239 | -0.626033 |
| O  | 3.674804  | -2.126434 | 1.665437  |
| C  | 3.168433  | -3.024252 | -0.418245 |
| C  | 3.613425  | -3.396324 | 1.041766  |
| C  | 2.622308  | -4.274674 | 1.797764  |
| H  | 3.012712  | -4.494465 | 2.803380  |
| H  | 1.649352  | -3.775837 | 1.909416  |
| H  | 2.468500  | -5.233771 | 1.279309  |
| C  | 5.007834  | -4.029308 | 1.075898  |
| H  | 5.005779  | -5.052068 | 0.670699  |

|   |          |           |           |
|---|----------|-----------|-----------|
| H | 5.722429 | -3.422374 | 0.502025  |
| H | 5.355042 | -4.070573 | 2.118864  |
| C | 1.650030 | -2.838345 | -0.524726 |
| H | 1.116538 | -3.796486 | -0.429924 |
| H | 1.417058 | -2.421934 | -1.513233 |
| H | 1.270743 | -2.143058 | 0.236786  |
| C | 3.629233 | -4.008343 | -1.487909 |
| H | 3.255630 | -3.687765 | -2.472504 |
| H | 4.724489 | -4.055751 | -1.542005 |
| H | 3.240134 | -5.019304 | -1.290362 |
| H | 7.539109 | 0.467442  | 1.591736  |
| O | 5.343035 | -0.579292 | 0.857927  |
| C | 7.373242 | 0.529929  | 0.513798  |
| C | 6.187541 | -0.026920 | -0.006304 |
| C | 8.302654 | 1.145335  | -0.318583 |
| C | 5.977176 | 0.046510  | -1.398570 |
| C | 8.082748 | 1.226454  | -1.695826 |
| H | 5.083309 | -0.410415 | -1.821151 |
| C | 6.915850 | 0.670081  | -2.220362 |
| H | 8.810768 | 1.712369  | -2.348765 |
| H | 6.728259 | 0.715992  | -3.296759 |
| H | 9.210982 | 1.570982  | 0.116305  |

116

Figure\_S15-9\_PA-9b(Naborate)-ts(1,6major)\_05 / electronic energy: -4398.55507914 a.u. / lowest freq: -437.49 cm<sup>-1</sup>

|    |           |           |           |
|----|-----------|-----------|-----------|
| Na | -2.788311 | -1.959483 | -0.913315 |
| H  | 5.865899  | 1.199277  | -2.441072 |
| C  | 5.370185  | 1.017247  | -1.484050 |
| H  | 6.020929  | 0.679093  | -0.670764 |
| H  | 6.721140  | -0.759321 | -3.794938 |
| H  | 8.854563  | -2.000231 | -3.642901 |
| C  | 6.865875  | -1.488106 | -2.992643 |
| C  | 8.068393  | -2.184988 | -2.907473 |
| H  | 4.442718  | -0.466520 | -3.179797 |
| C  | 4.571616  | -0.936530 | -2.201266 |
| C  | 5.833977  | -1.701685 | -2.064718 |
| C  | 8.266356  | -3.117523 | -1.888780 |
| H  | 9.208955  | -3.664309 | -1.817368 |
| C  | 6.042545  | -2.653304 | -1.055112 |
| C  | 7.245988  | -3.349547 | -0.965972 |
| H  | 5.256188  | -2.863636 | -0.329557 |
| H  | 7.384246  | -4.085885 | -0.170998 |
| C  | 4.266281  | 1.737720  | -1.156925 |
| C  | 3.111142  | 2.135170  | -0.828219 |
| H  | 2.212079  | -0.164914 | -2.889396 |
| C  | 3.395060  | -1.259963 | -1.524400 |
| O  | 0.103778  | 0.515694  | -3.158183 |
| C  | 2.169275  | -0.718964 | -1.948364 |
| H  | 3.425637  | -1.882632 | -0.632313 |
| C  | 0.817242  | -0.988893 | -1.505611 |
| C  | -0.272336 | -0.498837 | -2.368742 |
| O  | 1.488231  | -2.225774 | 0.377559  |
| H  | 2.744896  | 3.104392  | -0.487206 |
| Cu | 1.686418  | 0.709521  | -0.495032 |
| C  | 0.780610  | 1.482870  | 1.113879  |
| N  | 1.457514  | 2.028324  | 2.141439  |
| N  | -0.497358 | 1.827662  | 1.228953  |
| C  | -1.553068 | 1.359825  | 0.349558  |
| O  | -1.420572 | -0.907853 | -2.400813 |
| O  | -0.660387 | -2.325311 | -0.169527 |
| C  | -0.773462 | 2.680030  | 2.388147  |
| H  | -1.431805 | 2.160138  | 3.099920  |
| C  | 0.630191  | 2.924230  | 2.957726  |
| H  | 0.947748  | 3.969575  | 2.826771  |
| C  | 2.828615  | 1.799287  | 2.390777  |
| C  | 3.645847  | 2.830932  | 2.846830  |
| C  | 3.365081  | 0.527231  | 2.159680  |
| C  | 5.016625  | 2.614193  | 3.037901  |
| C  | 4.727241  | 0.295727  | 2.329271  |
| C  | 5.541596  | 1.350383  | 2.764391  |
| H  | 6.612548  | 1.175116  | 2.902225  |
| H  | 0.716843  | 2.668555  | 4.022730  |
| H  | -1.273727 | 3.606269  | 2.070723  |
| C  | 0.456058  | -1.900054 | -0.417273 |
| C  | -0.888999 | 1.064914  | -4.014641 |
| H  | -1.232826 | 0.316144  | -4.741940 |
| H  | -0.409251 | 1.902477  | -4.531726 |
| H  | -1.747231 | 1.427802  | -3.431670 |
| C  | 1.192171  | -3.033119 | 1.509237  |
| H  | 0.445103  | -2.547480 | 2.153006  |
| H  | 2.138737  | -3.154534 | 2.047358  |
| H  | 0.804958  | -4.014123 | 1.200609  |
| H  | -1.105661 | 0.535963  | -0.221867 |
| C  | -1.992051 | 2.431170  | -0.641133 |
| C  | -1.019607 | 3.218316  | -1.271218 |
| C  | -3.336117 | 2.619484  | -0.983051 |
| C  | -1.375238 | 4.170146  | -2.223820 |
| H  | 0.035472  | 3.077807  | -1.024116 |
| C  | -3.690741 | 3.572657  | -1.939784 |
| H  | -4.117267 | 2.014275  | -0.515517 |



|   |           |           |           |
|---|-----------|-----------|-----------|
| C | -2.716184 | 4.349383  | -2.564299 |
| H | -0.600042 | 4.769782  | -2.706246 |
| H | -4.744511 | 3.709360  | -2.194940 |
| H | -3.000064 | 5.093012  | -3.312159 |
| C | -2.676844 | 0.710215  | 1.159725  |
| H | -3.354288 | 1.479618  | 1.576455  |
| H | -2.211186 | 0.183002  | 2.014628  |
| O | -3.354618 | -0.175063 | 0.338230  |
| C | 5.318482  | -1.062134 | 2.062394  |
| H | 6.078002  | -1.013028 | 1.267136  |
| H | 5.813041  | -1.464136 | 2.959698  |
| H | 4.547363  | -1.779108 | 1.748238  |
| C | 5.894857  | 3.732386  | 3.536009  |
| H | 6.959106  | 3.507222  | 3.382863  |
| H | 5.666485  | 4.678068  | 3.022968  |
| H | 5.738776  | 3.900183  | 4.613598  |
| H | 3.228027  | 3.823505  | 3.028115  |
| H | 2.708151  | -0.281530 | 1.831861  |
| B | -4.752598 | -0.542003 | 0.641787  |
| O | -5.124297 | -1.568355 | -0.348365 |
| O | -5.668431 | 0.556803  | 0.439370  |
| C | -6.013642 | -0.984160 | -1.286170 |
| C | -6.698654 | 0.151379  | -0.438528 |
| C | -7.158333 | 1.351657  | -1.259258 |
| H | -7.896907 | 1.053897  | -2.019553 |
| H | -7.628958 | 2.094664  | -0.598000 |
| H | -6.311196 | 1.835399  | -1.763541 |
| C | -7.870897 | -0.380081 | 0.395625  |
| H | -8.744838 | -0.631410 | -0.223965 |
| H | -7.570823 | -1.271739 | 0.964491  |
| H | -8.168720 | 0.396284  | 1.115584  |
| C | -5.197429 | -0.426571 | -2.460119 |
| H | -5.836729 | 0.019362  | -3.236002 |
| H | -4.474926 | 0.327191  | -2.117464 |
| H | -4.636722 | -1.248484 | -2.932774 |
| C | -6.975225 | -2.049857 | -1.800491 |
| H | -6.425451 | -2.794732 | -2.396002 |
| H | -7.467957 | -2.574971 | -0.971986 |
| H | -7.748402 | -1.605365 | -2.446170 |
| H | -2.603065 | -4.981676 | 1.820806  |
| H | -1.381215 | -4.494405 | 3.940131  |
| C | -2.789705 | -4.047907 | 2.357779  |
| C | -2.107294 | -3.780587 | 3.545134  |
| C | -3.718374 | -3.141909 | 1.847436  |
| C | -2.376948 | -2.591379 | 4.226542  |
| H | -1.861026 | -2.370688 | 5.164769  |
| C | -3.970780 | -1.927397 | 2.511361  |
| C | -3.295705 | -1.675925 | 3.719064  |
| O | -4.829858 | -1.015180 | 2.046121  |
| H | -3.502267 | -0.737865 | 4.239447  |
| H | -4.276149 | -3.360901 | 0.934962  |

116

Figure\_S15-9\_PA-9b(Naborate)-ts(1,6major)\_06 / electronic energy: -4398.56485118 a.u. / lowest freq: -458.95 cm-1

|    |           |           |           |
|----|-----------|-----------|-----------|
| H  | 5.796405  | 2.467817  | 0.910039  |
| H  | 7.503943  | 2.213729  | -1.164601 |
| H  | 5.154911  | 2.026391  | -1.258632 |
| H  | 9.769252  | 1.215640  | -1.157831 |
| C  | 7.617688  | 1.129653  | -1.077338 |
| C  | 5.135874  | 0.971060  | -0.972846 |
| C  | 8.893008  | 0.568901  | -1.073514 |
| C  | 6.471498  | 0.326538  | -0.972670 |
| C  | 9.050148  | -0.812509 | -0.962140 |
| H  | 10.048069 | -1.255947 | -0.956168 |
| C  | 6.645112  | -1.061884 | -0.870038 |
| C  | 7.919083  | -1.624285 | -0.862692 |
| H  | 5.776731  | -1.717023 | -0.794790 |
| H  | 8.029692  | -2.707785 | -0.778855 |
| H  | 2.931414  | 2.081150  | -1.684336 |
| C  | 2.784560  | 1.004889  | -1.562118 |
| C  | 3.953803  | 0.286233  | -1.263602 |
| H  | 3.913219  | -0.798594 | -1.190840 |
| Cu | 1.528896  | 0.864995  | 0.127591  |
| H  | 1.926541  | 2.191397  | 2.352636  |
| C  | 2.602757  | 1.838887  | 1.573340  |
| C  | 3.864678  | 1.812733  | 1.481560  |
| C  | 5.162726  | 1.604886  | 1.132972  |
| H  | 5.680873  | 0.749818  | 1.579646  |
| N  | -1.077007 | 1.162626  | 1.433162  |
| C  | -0.067952 | 0.333651  | 1.190110  |
| N  | -0.221366 | -0.761109 | 1.956700  |
| C  | -1.309776 | 2.386166  | 0.679636  |
| O  | -0.427885 | 1.390676  | -3.206708 |
| C  | 0.555783  | 1.577513  | -2.513395 |
| C  | 1.473157  | 0.557816  | -1.981068 |
| C  | 1.061749  | -0.845030 | -2.098506 |
| O  | -0.015718 | -1.250126 | -2.507949 |
| Na | -2.038359 | -0.139291 | -2.651255 |
| C  | -2.001609 | 0.676230  | 2.458526  |
| H  | -3.026195 | 0.617789  | 2.065303  |

|   |           |           |           |
|---|-----------|-----------|-----------|
| C | -1.430491 | -0.706274 | 2.786046  |
| H | -1.163123 | -0.822132 | 3.846577  |
| C | 0.613924  | -1.900508 | 1.927420  |
| C | 1.995787  | -1.758990 | 1.757174  |
| C | 0.061447  | -3.174245 | 2.073354  |
| C | 2.822459  | -2.878563 | 1.695529  |
| C | 0.879288  | -4.310677 | 2.035925  |
| C | 2.251811  | -4.149397 | 1.837868  |
| H | 2.895330  | -5.033332 | 1.795185  |
| H | -2.130137 | -1.505318 | 2.513551  |
| H | -1.991122 | 1.352196  | 3.327538  |
| O | 1.987804  | -1.701819 | -1.657644 |
| O | 0.890650  | 2.825787  | -2.137965 |
| C | 0.044451  | 3.878650  | -2.575277 |
| H | -0.982144 | 3.727521  | -2.211846 |
| H | 0.461949  | 4.797681  | -2.150352 |
| H | 0.028366  | 3.941933  | -3.672077 |
| C | 1.619732  | -3.067892 | -1.538355 |
| H | 0.869955  | -3.193281 | -0.743204 |
| H | 2.534850  | -3.602356 | -1.261926 |
| H | 1.222232  | -3.455542 | -2.486120 |
| H | -0.579997 | 2.355794  | -0.139997 |
| C | -1.021843 | 3.630720  | 1.497550  |
| C | -1.912838 | 4.105757  | 2.468010  |
| C | 0.174722  | 4.325562  | 1.285552  |
| C | -1.605896 | 5.241706  | 3.217362  |
| H | -2.861096 | 3.591965  | 2.642727  |
| C | 0.483904  | 5.460812  | 2.033004  |
| H | 0.876197  | 3.964227  | 0.528417  |
| C | -0.406363 | 5.920725  | 3.003375  |
| H | -2.310946 | 5.599446  | 3.970960  |
| H | 1.424868  | 5.986530  | 1.856685  |
| H | -0.167221 | 6.810378  | 3.590233  |
| C | -2.700531 | 2.398438  | 0.028390  |
| H | -2.799883 | 3.377277  | -0.476675 |
| H | -3.489263 | 2.368551  | 0.801242  |
| O | -2.868538 | 1.376889  | -0.887072 |
| C | 0.272698  | -5.677346 | 2.217415  |
| H | 0.936727  | -6.466649 | 1.838394  |
| H | 0.087785  | -5.880509 | 3.284562  |
| H | -0.693846 | -5.751587 | 1.699004  |
| C | 4.305615  | -2.720000 | 1.490767  |
| H | 4.645809  | -3.297767 | 0.617059  |
| H | 4.576437  | -1.666890 | 1.331969  |
| H | 4.870414  | -3.089597 | 2.360471  |
| H | 2.434932  | -0.762329 | 1.687644  |
| H | -1.017474 | -3.300033 | 2.183335  |
| B | -3.644284 | 0.155178  | -0.598214 |
| O | -4.289829 | -0.241107 | -1.857639 |
| O | -4.703318 | 0.287965  | 0.365887  |
| C | -5.692104 | -0.309092 | -1.684289 |
| C | -5.921250 | 0.484151  | -0.333340 |
| C | -6.119404 | 1.987687  | -0.565917 |
| H | -6.090337 | 2.502278  | 0.406233  |
| H | -5.315600 | 2.397918  | -1.192811 |
| H | -7.086088 | 2.207646  | -1.041881 |
| C | -7.067940 | -0.049426 | 0.517693  |
| H | -8.024274 | 0.008892  | -0.024282 |
| H | -6.894818 | -1.092779 | 0.812019  |
| H | -7.158837 | 0.551951  | 1.434764  |
| C | -6.382794 | 0.318287  | -2.893275 |
| H | -7.471528 | 0.380589  | -2.741636 |
| H | -6.200698 | -0.299663 | -3.785688 |
| H | -5.997870 | 1.325935  | -3.096452 |
| C | -6.102758 | -1.782198 | -1.587408 |
| H | -5.739752 | -2.307122 | -2.483814 |
| H | -5.651640 | -2.265206 | -0.710794 |
| H | -7.195160 | -1.903687 | -1.536996 |
| H | -4.344897 | -1.793494 | 1.527945  |
| O | -2.605691 | -0.852831 | -0.236964 |
| C | -3.766810 | -2.555605 | 1.004007  |
| C | -2.851824 | -2.143117 | 0.019906  |
| C | -3.935497 | -3.911293 | 1.282546  |
| C | -2.121735 | -3.120733 | -0.673456 |
| C | -3.206300 | -4.880193 | 0.590799  |
| H | -1.400275 | -2.791583 | -1.423937 |
| C | -2.299354 | -4.472400 | -0.389221 |
| H | -3.344853 | -5.940670 | 0.811941  |
| H | -1.716349 | -5.216372 | -0.938560 |
| H | -4.651631 | -4.213814 | 2.050934  |

116

Figure\_S15-9\_PA-9b(Naborate)-ts(1,6major)\_07 / electronic energy: -4398.56096625 a.u. / lowest freq: -450.65 cm-1

|   |           |           |           |
|---|-----------|-----------|-----------|
| H | -5.831829 | -1.844022 | 1.262390  |
| H | -7.331535 | -2.328229 | -0.695857 |
| H | -4.945847 | -2.415660 | -0.797657 |
| H | -9.479622 | -1.313068 | -1.383208 |
| C | -7.334258 | -1.351630 | -1.187738 |
| C | -4.851234 | -1.342452 | -0.983644 |
| C | -8.544671 | -0.781248 | -1.573262 |

|    |           |           |           |
|----|-----------|-----------|-----------|
| C  | -6.114432 | -0.694868 | -1.416217 |
| C  | -8.563579 | 0.464411  | -2.201412 |
| H  | -9.510824 | 0.916004  | -2.503609 |
| C  | -6.149226 | 0.549965  | -2.063119 |
| C  | -7.359143 | 1.123990  | -2.446990 |
| H  | -5.221236 | 1.078741  | -2.283310 |
| H  | -7.358921 | 2.094294  | -2.948590 |
| H  | -2.681904 | -2.753649 | -0.918314 |
| C  | -2.463794 | -1.727450 | -1.225811 |
| C  | -3.589504 | -0.902604 | -1.384130 |
| H  | -3.456535 | 0.111295  | -1.756122 |
| Cu | -1.359363 | -0.992629 | 0.395879  |
| H  | -2.069438 | -1.312727 | 2.898413  |
| C  | -2.636697 | -1.273084 | 1.968281  |
| C  | -3.876034 | -1.179541 | 1.732007  |
| C  | -5.111818 | -1.024781 | 1.186944  |
| H  | -5.547820 | -0.020305 | 1.181799  |
| N  | 1.296189  | -0.690609 | 1.674157  |
| C  | 0.137311  | -0.118779 | 1.380790  |
| N  | 0.063346  | 1.052025  | 2.050020  |
| C  | 1.739315  | -1.963931 | 1.133619  |
| O  | 0.787746  | -2.891420 | -2.348348 |
| C  | -0.233098 | -2.727088 | -1.704455 |
| C  | -1.100703 | -1.539213 | -1.683385 |
| C  | -0.645075 | -0.367972 | -2.441653 |
| O  | 0.301494  | -0.323219 | -3.206641 |
| Na | 2.349627  | -1.304323 | -3.024697 |
| C  | 2.151689  | 0.121820  | 2.536977  |
| H  | 3.027946  | 0.477347  | 1.975194  |
| C  | 1.216065  | 1.265965  | 2.931947  |
| H  | 0.908069  | 1.197448  | 3.986982  |
| C  | -1.015599 | 1.953740  | 2.009800  |
| C  | -1.191829 | 2.875146  | 3.045033  |
| C  | -1.903956 | 1.960751  | 0.927765  |
| C  | -2.259050 | 3.780483  | 3.023435  |
| C  | -2.990987 | 2.831116  | 0.904896  |
| C  | -3.158651 | 3.739615  | 1.957378  |
| H  | -4.000894 | 4.437054  | 1.937148  |
| H  | 1.656897  | 2.257287  | 2.754176  |
| H  | 2.497743  | -0.464082 | 3.400838  |
| O  | -1.376458 | 0.734518  | -2.215300 |
| O  | -0.663216 | -3.686657 | -0.862597 |
| C  | 0.115179  | -4.869356 | -0.775133 |
| H  | 1.118307  | -4.648864 | -0.381352 |
| H  | -0.415633 | -5.529465 | -0.081018 |
| H  | 0.213525  | -5.350833 | -1.757784 |
| C  | -0.972705 | 1.916697  | -2.893344 |
| H  | 0.088937  | 2.125595  | -2.707294 |
| H  | -1.593601 | 2.724407  | -2.489872 |
| H  | -1.136783 | 1.819031  | -3.975600 |
| H  | 0.957537  | -2.253585 | 0.422896  |
| C  | 1.779646  | -3.022347 | 2.221769  |
| C  | 2.951161  | -3.366186 | 2.902706  |
| C  | 0.581118  | -3.653797 | 2.579330  |
| C  | 2.925175  | -4.324483 | 3.918169  |
| H  | 3.898054  | -2.886724 | 2.645591  |
| C  | 0.552152  | -4.609130 | 3.591609  |
| H  | -0.339361 | -3.389353 | 2.049830  |
| C  | 1.727947  | -4.947776 | 4.264621  |
| H  | 3.848851  | -4.583765 | 4.440284  |
| H  | -0.390295 | -5.094882 | 3.853828  |
| H  | 1.709705  | -5.699025 | 5.057058  |
| C  | 3.029305  | -1.820155 | 0.322154  |
| H  | 3.335487  | -2.840430 | 0.023918  |
| H  | 3.847873  | -1.417004 | 0.944677  |
| O  | 2.836841  | -1.037026 | -0.801299 |
| C  | -3.979292 | 2.769332  | -0.228247 |
| H  | -4.745869 | 2.003434  | -0.028611 |
| H  | -4.497151 | 3.727799  | -0.372201 |
| H  | -3.487310 | 2.494621  | -1.172264 |
| C  | -2.409704 | 4.788658  | 4.133228  |
| H  | -2.302948 | 4.314714  | 5.120323  |
| H  | -1.632749 | 5.566274  | 4.060478  |
| H  | -3.388156 | 5.286633  | 4.094804  |
| H  | -0.495850 | 2.902683  | 3.884454  |
| H  | -1.732237 | 1.304843  | 0.072737  |
| B  | 3.377022  | 0.336307  | -0.913081 |
| O  | 3.621275  | 0.538672  | -2.354788 |
| O  | 4.663810  | 0.516818  | -0.274414 |
| C  | 4.961729  | 0.945056  | -2.548283 |
| C  | 5.674874  | 0.394596  | -1.256825 |
| C  | 6.063278  | -1.083867 | -1.393510 |
| H  | 6.365522  | -1.462623 | -0.405621 |
| H  | 5.209332  | -1.684687 | -1.737070 |
| H  | 6.902815  | -1.229092 | -2.089352 |
| C  | 6.894576  | 1.200267  | -0.824298 |
| H  | 7.661891  | 1.208198  | -1.613656 |
| H  | 6.625480  | 2.238137  | -0.587830 |
| H  | 7.338158  | 0.750220  | 0.076726  |

|   |          |           |           |
|---|----------|-----------|-----------|
| C | 5.486025 | 0.353976  | -3.853380 |
| H | 6.560946 | 0.556224  | -3.979131 |
| H | 4.956406 | 0.804342  | -4.706810 |
| H | 5.331758 | -0.733357 | -3.893596 |
| C | 5.002064 | 2.475134  | -2.630951 |
| H | 4.311208 | 2.802728  | -3.421932 |
| H | 4.671465 | 2.929316  | -1.686382 |
| H | 6.007520 | 2.851948  | -2.871609 |
| H | 4.406176 | 2.460270  | 0.767464  |
| O | 2.319507 | 1.232462  | -0.403477 |
| C | 3.494459 | 3.050883  | 0.689449  |
| C | 2.376238 | 2.481401  | 0.048780  |
| C | 3.416048 | 4.338025  | 1.222665  |
| C | 1.202586 | 3.251709  | -0.042433 |
| C | 2.240988 | 5.086710  | 1.143754  |
| H | 0.330532 | 2.799499  | -0.514673 |
| C | 1.131949 | 4.527798  | 0.504009  |
| H | 2.188350 | 6.087850  | 1.576844  |
| H | 0.193557 | 5.084885  | 0.437220  |
| H | 4.295056 | 4.758441  | 1.719171  |

116

Figure\_S15-9\_PA-9b(Naborate)-ts(1,6major)\_08 / electronic energy: -4398.56213541 a.u. / lowest freq: -466.03 cm-1

|    |           |           |           |
|----|-----------|-----------|-----------|
| H  | -5.354416 | -3.216702 | 0.841375  |
| C  | -8.454198 | -2.224031 | -1.753864 |
| H  | -9.978381 | -0.703317 | -1.952683 |
| H  | -6.747166 | -3.517086 | -1.511738 |
| C  | -8.920171 | -0.909645 | -1.778875 |
| C  | -7.103508 | -2.483266 | -1.530443 |
| C  | -8.020317 | 0.139035  | -1.581839 |
| C  | -6.187720 | -1.439332 | -1.329911 |
| H  | -8.372867 | 1.172888  | -1.601731 |
| C  | -6.670587 | -0.122515 | -1.360770 |
| H  | -4.516695 | -2.816254 | -1.277209 |
| C  | -4.759615 | -1.765842 | -1.093722 |
| H  | -5.984986 | 0.711307  | -1.208251 |
| C  | -4.947379 | -2.218500 | 1.026709  |
| C  | -3.699598 | -2.105008 | 1.559560  |
| C  | -2.486293 | -1.842723 | 1.806133  |
| C  | -3.719971 | -0.860186 | -1.322299 |
| Cu | -1.446383 | -0.808515 | 0.375336  |
| H  | -2.294848 | -2.414275 | -1.441120 |
| C  | -2.396252 | -1.324287 | -1.414060 |
| C  | -1.171485 | -0.630049 | -1.738680 |
| C  | -0.037576 | -1.476747 | -2.159186 |
| C  | -1.040371 | 0.802408  | -2.012067 |
| O  | 0.748207  | -1.229718 | -3.052561 |
| O  | -0.036412 | 1.360309  | -2.430467 |
| Na | 2.056816  | 0.618181  | -3.145304 |
| H  | 1.143057  | -4.259061 | -1.024700 |
| O  | 0.047027  | -2.620306 | -1.466535 |
| C  | 1.128875  | -3.482559 | -1.797523 |
| H  | 2.072350  | -2.919681 | -1.802269 |
| H  | 0.973692  | -3.939338 | -2.785495 |
| H  | -5.688262 | -1.463430 | 1.309349  |
| H  | -3.913151 | 0.210720  | -1.360466 |
| O  | -2.137122 | 1.507864  | -1.714640 |
| C  | -2.033151 | 2.921725  | -1.780388 |
| H  | -1.684176 | 3.246564  | -2.769910 |
| N  | 0.968960  | -0.435687 | 1.977970  |
| N  | -0.188791 | 1.399717  | 2.007696  |
| C  | -0.129912 | 0.147122  | 1.514253  |
| C  | 1.441613  | -1.731329 | 1.508626  |
| H  | -9.147169 | -3.053894 | -1.910037 |
| H  | -1.878110 | -1.950040 | 2.704628  |
| C  | 1.788792  | 0.440376  | 2.813683  |
| H  | 2.794696  | 0.548153  | 2.383091  |
| C  | 1.014331  | 1.759214  | 2.768111  |
| H  | 0.739383  | 2.134556  | 3.764334  |
| C  | -1.231929 | 2.322354  | 1.796027  |
| C  | -2.528553 | 1.890360  | 1.494680  |
| C  | -0.976832 | 3.691923  | 1.916739  |
| C  | -3.548758 | 2.811747  | 1.264461  |
| C  | -1.989568 | 4.630494  | 1.698193  |
| C  | -3.269470 | 4.178671  | 1.368644  |
| H  | -4.068505 | 4.905781  | 1.195566  |
| H  | 1.581112  | 2.539139  | 2.242530  |
| H  | 1.878643  | 0.030663  | 3.830783  |
| H  | -1.341966 | 3.290406  | -1.007396 |
| H  | -3.038263 | 3.310189  | -1.585748 |
| H  | 0.679131  | -2.066211 | 0.792726  |
| C  | 1.529352  | -2.760281 | 2.617803  |
| C  | 2.556697  | -2.737568 | 3.569567  |
| C  | 0.558043  | -3.764772 | 2.703910  |
| C  | 2.602302  | -3.687156 | 4.589740  |
| H  | 3.336746  | -1.974610 | 3.518493  |
| C  | 0.603090  | -4.718000 | 3.720572  |
| H  | -0.245405 | -3.796136 | 1.962711  |
| C  | 1.625198  | -4.679339 | 4.668764  |
| H  | 3.408346  | -3.653326 | 5.325927  |

|   |           |           |           |
|---|-----------|-----------|-----------|
| H | -0.163468 | -5.494300 | 3.770708  |
| H | 1.662474  | -5.424636 | 5.466180  |
| C | 2.743561  | -1.564206 | 0.720562  |
| H | 2.969840  | -2.542395 | 0.251208  |
| H | 3.592023  | -1.346969 | 1.394813  |
| O | 2.555162  | -0.550018 | -0.194881 |
| C | -1.689753 | 6.105007  | 1.778356  |
| H | -1.563503 | 6.531306  | 0.769928  |
| H | -2.509285 | 6.654662  | 2.263729  |
| H | -0.763655 | 6.298707  | 2.337384  |
| C | -4.926627 | 2.339450  | 0.884735  |
| H | -5.123720 | 2.552546  | -0.178816 |
| H | -5.039129 | 1.256798  | 1.036445  |
| H | -5.705799 | 2.854239  | 1.465819  |
| H | -2.755177 | 0.823672  | 1.457527  |
| H | 0.025157  | 4.042456  | 2.162994  |
| B | 3.659880  | 0.003379  | -0.945292 |
| O | 3.864489  | -0.614111 | -2.268656 |
| O | 4.934361  | -0.110497 | -0.274225 |
| C | 5.177891  | -1.126102 | -2.357625 |
| C | 5.941126  | -0.309834 | -1.246770 |
| C | 7.109340  | -1.053543 | -0.609763 |
| H | 7.598051  | -0.408805 | 0.136084  |
| H | 6.771149  | -1.964885 | -0.099775 |
| H | 7.861038  | -1.330439 | -1.364971 |
| C | 6.423968  | 1.054872  | -1.756458 |
| H | 7.255903  | 0.958929  | -2.469823 |
| H | 5.603626  | 1.606362  | -2.236339 |
| H | 6.773684  | 1.649725  | -0.899445 |
| C | 5.137501  | -2.627248 | -2.048184 |
| H | 6.118819  | -3.107555 | -2.178305 |
| H | 4.425422  | -3.110579 | -2.733759 |
| H | 4.795019  | -2.805156 | -1.018752 |
| C | 5.713394  | -0.916898 | -3.770565 |
| H | 5.144279  | -1.537416 | -4.479678 |
| H | 5.615092  | 0.131562  | -4.082291 |
| H | 6.773552  | -1.205537 | -3.842442 |
| H | 4.736141  | 1.891880  | 0.820452  |
| O | 3.207809  | 1.409292  | -1.290866 |
| C | 3.939797  | 2.617926  | 0.656272  |
| C | 3.058950  | 2.410194  | -0.422138 |
| C | 3.801938  | 3.743376  | 1.467483  |
| C | 2.019878  | 3.336016  | -0.630528 |
| C | 2.793999  | 4.681332  | 1.233172  |
| H | 1.307068  | 3.143205  | -1.435256 |
| C | 1.902849  | 4.462674  | 0.179729  |
| H | 2.699075  | 5.566004  | 1.866541  |
| H | 1.094381  | 5.174370  | -0.007765 |
| H | 4.503181  | 3.892690  | 2.292937  |

116

Figure\_S15-9\_PA-9b(Naborate)-ts(1,6major)\_09 / electronic energy: -4398.56071055 a.u. / lowest freq: -403.07 cm<sup>-1</sup>

|    |           |           |           |
|----|-----------|-----------|-----------|
| C  | -1.406877 | 1.844433  | -2.080887 |
| H  | -2.294799 | 2.192140  | -1.545881 |
| C  | -0.182486 | 2.722316  | -1.838677 |
| H  | 0.105444  | 3.323113  | -2.711957 |
| C  | 0.332854  | 0.514266  | -1.255826 |
| C  | 2.224423  | 2.066242  | -1.496545 |
| C  | 2.627895  | 3.328472  | -1.063645 |
| C  | 3.177737  | 1.152505  | -1.962483 |
| C  | 3.985628  | 3.675460  | -1.049111 |
| C  | 4.530911  | 1.481665  | -1.968046 |
| C  | 4.922035  | 2.744252  | -1.498834 |
| H  | 5.983761  | 3.008536  | -1.501748 |
| Cu | 1.323328  | -0.979937 | -0.350220 |
| N  | -0.968192 | 0.552912  | -1.529963 |
| N  | 0.852880  | 1.731381  | -1.524687 |
| C  | 2.173334  | -1.441959 | 1.547332  |
| C  | 0.862893  | -0.890911 | 1.800286  |
| B  | -4.327693 | 0.976694  | -0.090502 |
| H  | -0.335843 | 3.401787  | -0.984151 |
| H  | -1.645067 | 1.736481  | -3.150536 |
| H  | 2.226250  | -2.525081 | 1.674612  |
| C  | 0.596727  | 0.528681  | 2.047706  |
| C  | -0.217740 | -1.841301 | 2.098801  |
| O  | 1.654592  | 1.318138  | 1.833121  |
| O  | -0.458380 | 1.015642  | 2.425626  |
| O  | -1.392522 | -1.570145 | 2.308432  |
| O  | 0.187833  | -3.116277 | 2.124438  |
| C  | -0.768652 | -4.104452 | 2.470537  |
| H  | -1.198754 | -3.904358 | 3.461562  |
| H  | -0.228812 | -5.057092 | 2.479179  |
| H  | -1.583908 | -4.148896 | 1.734628  |
| C  | 1.474965  | 2.707469  | 2.048354  |
| H  | 0.702488  | 3.107787  | 1.376541  |
| H  | 2.440896  | 3.173234  | 1.826088  |
| H  | 1.184202  | 2.910013  | 3.088310  |
| C  | -1.867766 | -0.573943 | -1.282258 |
| H  | -2.004418 | -0.680215 | -0.195992 |
| C  | -1.290829 | -1.873244 | -1.805288 |

|    |           |           |           |
|----|-----------|-----------|-----------|
| C  | -1.306909 | -3.011849 | -0.998342 |
| C  | -0.826895 | -1.982887 | -3.121326 |
| C  | -0.854846 | -4.239091 | -1.483683 |
| H  | -1.697103 | -2.926678 | 0.017531  |
| C  | -0.386404 | -3.208795 | -3.614237 |
| H  | -0.798276 | -1.097843 | -3.762213 |
| C  | -0.395256 | -4.341029 | -2.794749 |
| H  | -0.864632 | -5.117176 | -0.834111 |
| H  | -0.025387 | -3.282673 | -4.642418 |
| H  | -0.038913 | -5.298456 | -3.180506 |
| C  | -3.266488 | -0.404370 | -1.912759 |
| H  | -3.765310 | -1.379149 | -1.750819 |
| H  | -3.135097 | -0.306060 | -3.005687 |
| O  | -4.048826 | 0.646488  | -1.478436 |
| C  | 3.409240  | -0.804259 | 1.353609  |
| H  | 3.441407  | 0.271820  | 1.199491  |
| C  | 4.589495  | -1.547420 | 1.307171  |
| H  | 4.549660  | -2.552181 | 1.732458  |
| C  | 5.926932  | -0.915725 | 1.339845  |
| C  | 7.044448  | -1.684707 | 1.700363  |
| C  | 6.126874  | 0.437057  | 1.023949  |
| C  | 8.318759  | -1.123885 | 1.744245  |
| H  | 6.908689  | -2.741258 | 1.946771  |
| C  | 7.400336  | 0.998224  | 1.065680  |
| H  | 5.283741  | 1.062155  | 0.724353  |
| C  | 8.503126  | 0.221961  | 1.425814  |
| H  | 9.173262  | -1.741718 | 2.029507  |
| H  | 7.531683  | 2.053147  | 0.813506  |
| H  | 9.500758  | 0.664887  | 1.459515  |
| C  | 5.556466  | 0.515669  | -2.498591 |
| H  | 5.086377  | -0.412650 | -2.850773 |
| H  | 6.114810  | 0.957935  | -3.337786 |
| H  | 6.290076  | 0.258297  | -1.718748 |
| C  | 4.408984  | 5.029821  | -0.542461 |
| H  | 5.484423  | 5.196792  | -0.691095 |
| H  | 3.862907  | 5.835069  | -1.056795 |
| H  | 4.197583  | 5.131357  | 0.533794  |
| H  | 1.887340  | 4.053402  | -0.720000 |
| H  | 2.852868  | 0.184031  | -2.343496 |
| C  | 2.376379  | -2.285125 | -1.497220 |
| H  | 1.726459  | -2.575453 | -2.325111 |
| C  | 3.582213  | -2.547346 | -1.218792 |
| C  | 4.827554  | -2.612121 | -0.685135 |
| H  | 5.163914  | -3.540711 | -0.215509 |
| H  | 5.614758  | -1.982405 | -1.108151 |
| Na | -2.586713 | 0.357566  | 2.161736  |
| H  | -6.547795 | -0.485721 | -0.635785 |
| C  | -6.160230 | -1.416015 | -0.218159 |
| O  | -4.298645 | -0.254722 | 0.774965  |
| C  | -4.982345 | -1.382181 | 0.544667  |
| C  | -4.488469 | -2.576161 | 1.096520  |
| H  | -3.565389 | -2.535045 | 1.681272  |
| C  | -5.153444 | -3.780031 | 0.879190  |
| H  | -4.751390 | -4.700380 | 1.311094  |
| H  | -7.727187 | -2.643933 | -1.029798 |
| C  | -6.812678 | -2.629594 | -0.430986 |
| C  | -6.319131 | -3.817739 | 0.110982  |
| H  | -6.837427 | -4.763061 | -0.062474 |
| O  | -3.289871 | 1.860208  | 0.497655  |
| O  | -5.557377 | 1.723602  | 0.029034  |
| C  | -5.248739 | 3.093447  | 0.167810  |
| C  | -3.887787 | 3.059341  | 0.960899  |
| C  | -5.092947 | 3.721486  | -1.224825 |
| C  | -6.388372 | 3.791055  | 0.903552  |
| H  | -4.262891 | 3.259279  | -1.776675 |
| C  | -2.952186 | 4.228898  | 0.671752  |
| C  | -4.103866 | 2.949733  | 2.476315  |
| H  | -4.930256 | 4.808333  | -1.172392 |
| H  | -6.015242 | 3.534925  | -1.794412 |
| H  | -7.291425 | 3.784713  | 0.274825  |
| H  | -6.136730 | 4.839795  | 1.125596  |
| H  | -6.630797 | 3.278761  | 1.843784  |
| H  | -2.691535 | 4.279364  | -0.393648 |
| H  | -3.410752 | 5.186625  | 0.962617  |
| H  | -2.019908 | 4.107305  | 1.244272  |
| H  | -3.132207 | 2.814206  | 2.978842  |
| H  | -4.556135 | 3.857253  | 2.900636  |
| H  | -4.754996 | 2.095740  | 2.716480  |

116

Figure\_S15-9\_PA-9b(Naborate)-ts(1,6major)\_10 / electronic energy: -4398.56065632 a.u. / lowest freq: -402.77 cm-1

|   |           |          |          |
|---|-----------|----------|----------|
| C | 1.404445  | 1.842430 | 2.083772 |
| H | 2.290958  | 2.192644 | 1.547997 |
| C | 0.178071  | 2.718922 | 1.845294 |
| H | -0.111136 | 3.314996 | 2.721394 |
| C | -0.333492 | 0.511590 | 1.255895 |
| C | -2.227806 | 2.059006 | 1.500194 |
| C | -2.634436 | 3.320786 | 1.064813 |
| C | -3.177905 | 1.145418 | 1.969258 |
| C | -3.991476 | 3.665354 | 1.052108 |

|    |           |           |           |
|----|-----------|-----------|-----------|
| C  | -4.532638 | 1.473195  | 1.977644  |
| C  | -4.925998 | 2.733639  | 1.508728  |
| H  | -5.987859 | 2.997690  | 1.516070  |
| Cu | -1.322460 | -0.981103 | 0.346809  |
| N  | 0.967311  | 0.551172  | 1.531036  |
| N  | -0.855322 | 1.727328  | 1.526661  |
| C  | -2.172031 | -1.438848 | -1.551427 |
| C  | -0.861311 | -0.888023 | -1.803442 |
| B  | 4.327384  | 0.979212  | 0.093260  |
| H  | 0.330081  | 3.402829  | 0.994091  |
| H  | 1.644712  | 1.732966  | 3.152776  |
| H  | -2.225690 | -2.521677 | -1.680905 |
| C  | -0.594236 | 0.531724  | -2.049033 |
| C  | 0.219110  | -1.838508 | -2.102584 |
| O  | -1.651233 | 1.322023  | -1.833234 |
| O  | 0.461194  | 1.018216  | -2.426685 |
| O  | 1.394134  | -1.567623 | -2.311222 |
| O  | -0.186944 | -3.113297 | -2.129836 |
| C  | 0.769385  | -4.101391 | -2.476600 |
| H  | 1.199160  | -3.900934 | -3.467698 |
| H  | 0.229493  | -5.053999 | -2.485450 |
| H  | 1.584903  | -4.146118 | -1.741005 |
| C  | -1.469410 | 2.711434  | -2.046655 |
| H  | -0.697292 | 3.109778  | -1.373234 |
| H  | -2.434815 | 3.178578  | -1.825235 |
| H  | -1.176691 | 2.914736  | -3.085901 |
| C  | 1.868061  | -0.574356 | 1.281728  |
| H  | 2.005363  | -0.678644 | 0.195353  |
| C  | 1.292002  | -1.875108 | 1.802142  |
| C  | 1.309240  | -3.012186 | 0.993072  |
| C  | 0.827584  | -1.987580 | 3.117762  |
| C  | 0.857861  | -4.240660 | 1.475927  |
| H  | 1.699685  | -2.924807 | -0.022521 |
| C  | 0.387771  | -3.214732 | 3.608196  |
| H  | 0.798068  | -1.103784 | 3.760325  |
| C  | 0.397776  | -4.345420 | 2.786593  |
| H  | 0.868499  | -5.117485 | 0.824671  |
| H  | 0.026354  | -3.290794 | 4.636076  |
| H  | 0.041954  | -5.303832 | 3.170384  |
| C  | 3.266264  | -0.404619 | 1.913235  |
| H  | 3.765927  | -1.378793 | 1.750281  |
| H  | 3.134219  | -0.307893 | 3.006226  |
| O  | 4.047932  | 0.647458  | 1.480689  |
| C  | -3.407485 | -0.800663 | -1.355980 |
| H  | -3.438813 | 0.275179  | -1.199801 |
| C  | -4.588212 | -1.543149 | -1.310626 |
| H  | -4.549323 | -2.546907 | -1.738351 |
| C  | -5.925275 | -0.910613 | -1.340303 |
| C  | -7.043296 | -1.677194 | -1.704303 |
| C  | -6.124340 | 0.440652  | -1.017513 |
| C  | -8.317309 | -1.115430 | -1.744985 |
| H  | -6.908195 | -2.732588 | -1.955972 |
| C  | -7.397489 | 1.002713  | -1.055925 |
| H  | -5.280690 | 1.063542  | -0.714863 |
| C  | -8.500824 | 0.228880  | -1.419656 |
| H  | -9.172270 | -1.731338 | -2.033023 |
| H  | -7.528241 | 2.056387  | -0.798233 |
| H  | -9.498238 | 0.672486  | -1.450666 |
| C  | -5.555304 | 0.505725  | 2.511301  |
| H  | -5.083302 | -0.422715 | 2.860593  |
| H  | -6.111011 | 0.946485  | 3.353015  |
| H  | -6.291377 | 0.248702  | 1.733633  |
| C  | -4.430567 | 5.005344  | 0.520780  |
| H  | -5.377722 | 5.327546  | 0.975473  |
| H  | -3.674534 | 5.780878  | 0.709239  |
| H  | -4.587475 | 4.957005  | -0.569168 |
| H  | -1.894841 | 4.045592  | 0.719227  |
| H  | -2.850920 | 0.178357  | 2.352093  |
| C  | -2.374771 | -2.288923 | 1.491245  |
| H  | -1.724529 | -2.581139 | 2.318206  |
| C  | -3.580840 | -2.549893 | 1.212725  |
| C  | -4.826420 | -2.612582 | 0.679442  |
| H  | -5.163719 | -3.539747 | 0.207682  |
| H  | -5.612943 | -1.983154 | 1.104135  |
| Na | 2.588740  | 0.359691  | -2.160758 |
| H  | 6.548155  | -0.481978 | 0.639395  |
| C  | 6.161970  | -1.412149 | 0.220223  |
| O  | 4.300258  | -0.251493 | -0.773388 |
| C  | 4.984834  | -1.378540 | -0.543770 |
| C  | 4.492677  | -2.572346 | -1.097543 |
| H  | 3.570152  | -2.531537 | -1.683203 |
| C  | 5.158605  | -3.775827 | -0.880980 |
| H  | 4.757880  | -4.696060 | -1.314352 |
| H  | 7.729291  | -2.639509 | 1.032004  |
| C  | 6.815393  | -2.625340 | 0.432254  |
| C  | 6.323555  | -3.813312 | -0.111650 |
| H  | 6.842573  | -4.758345 | 0.061218  |
| O  | 3.289020  | 1.862035  | -0.494925 |
| O  | 5.556328  | 1.727547  | -0.024739 |

|   |          |          |           |
|---|----------|----------|-----------|
| C | 5.246241 | 3.097164 | -0.162615 |
| C | 3.886018 | 3.062133 | -0.956870 |
| C | 5.088557 | 3.723846 | 1.230420  |
| C | 6.385688 | 3.796645 | -0.896861 |
| H | 4.258400 | 3.260373 | 1.781063  |
| C | 2.948847 | 4.230451 | -0.667780 |
| C | 4.103578 | 2.953809 | -2.472183 |
| H | 4.924901 | 4.810590 | 1.178795  |
| H | 6.010481 | 3.537626 | 1.800715  |
| H | 7.288204 | 3.790912 | -0.267357 |
| H | 6.133009 | 4.845246 | -1.118386 |
| H | 6.629490 | 3.285273 | -1.837237 |
| H | 2.687043 | 4.279829 | 0.397392  |
| H | 3.406662 | 5.188902 | -0.957438 |
| H | 2.017274 | 4.108276 | -1.241324 |
| H | 3.132519 | 2.817573 | -2.975674 |
| H | 4.555187 | 3.862159 | -2.895439 |
| H | 4.755918 | 2.100746 | -2.712449 |

51

Figure\_S15-9\_9d-Cu-allenyl / electronic energy: -2677.36469942 a.u. / lowest freq: 18.91 cm-1

|    |           |           |           |
|----|-----------|-----------|-----------|
| C  | -0.949725 | -2.111091 | -0.745708 |
| H  | -1.456710 | -2.283710 | -1.705397 |
| C  | 0.561005  | -2.346837 | -0.831595 |
| H  | 0.890390  | -3.232260 | -0.270668 |
| C  | 0.165570  | -0.172304 | -0.062012 |
| C  | 2.489588  | -0.947618 | -0.009125 |
| C  | 3.411595  | -1.770382 | -0.661262 |
| C  | 2.949352  | 0.031053  | 0.882181  |
| C  | 4.786704  | -1.603717 | -0.456366 |
| C  | 4.314605  | 0.217353  | 1.092648  |
| C  | 5.223765  | -0.605927 | 0.415840  |
| H  | 6.296282  | -0.467228 | 0.579491  |
| Cu | 0.319303  | 1.720856  | 0.321210  |
| N  | -1.018985 | -0.701736 | -0.358187 |
| N  | 1.108117  | -1.120853 | -0.238640 |
| H  | -1.611031 | 2.294197  | -1.821534 |
| H  | 0.899252  | -2.452084 | -1.873899 |
| H  | -1.438768 | -2.738242 | 0.015197  |
| C  | -2.263181 | 0.059952  | -0.389790 |
| H  | -2.079760 | 0.941851  | 0.244418  |
| C  | -3.394832 | -0.734034 | 0.234210  |
| C  | -4.274734 | -1.509681 | -0.527751 |
| C  | -3.538962 | -0.723986 | 1.626854  |
| C  | -5.279826 | -2.255582 | 0.089569  |
| H  | -4.183468 | -1.543227 | -1.615414 |
| C  | -4.540821 | -1.467687 | 2.245898  |
| H  | -2.855877 | -0.121511 | 2.231908  |
| C  | -5.415255 | -2.236764 | 1.476429  |
| H  | -5.958977 | -2.855647 | -0.519831 |
| H  | -4.643075 | -1.444096 | 3.332974  |
| H  | -6.203316 | -2.819047 | 1.958824  |
| C  | -2.550525 | 0.591965  | -1.802286 |
| H  | -3.536244 | 1.092393  | -1.782965 |
| H  | -2.627040 | -0.245072 | -2.514744 |
| O  | -1.535632 | 1.430876  | -2.265600 |
| C  | 4.800481  | 1.257189  | 2.068770  |
| H  | 4.053326  | 2.049530  | 2.216065  |
| H  | 5.002982  | 0.802287  | 3.051711  |
| H  | 5.735078  | 1.721832  | 1.723578  |
| C  | 5.770329  | -2.464765 | -1.205878 |
| H  | 6.734464  | -2.524069 | -0.682115 |
| H  | 5.386771  | -3.485941 | -1.343318 |
| H  | 5.962508  | -2.048637 | -2.207961 |
| H  | 3.073111  | -2.542835 | -1.353500 |
| H  | 2.231718  | 0.647662  | 1.427342  |
| C  | 0.056509  | 3.624341  | 0.493740  |
| H  | 0.571009  | 4.357231  | 1.130573  |
| C  | -0.918418 | 4.038216  | -0.261867 |
| C  | -1.925600 | 4.342938  | -1.074928 |
| H  | -2.962524 | 4.334227  | -0.721718 |
| H  | -1.744517 | 4.692912  | -2.096941 |

83

Figure\_S15-9\_PA-9b-ts(1,6major)\_01 / electronic energy: -3519.31528051 a.u. / lowest freq: -465.34 cm-1

|    |           |           |           |
|----|-----------|-----------|-----------|
| C  | 3.034515  | 2.602950  | 0.387172  |
| H  | 3.544892  | 2.951927  | -0.520229 |
| C  | 1.692551  | 3.314894  | 0.614999  |
| H  | 1.658274  | 3.874150  | 1.560695  |
| C  | 1.323993  | 1.008726  | 0.402695  |
| C  | -0.640733 | 2.364519  | 0.904516  |
| C  | -1.369351 | 3.334313  | 0.220290  |
| C  | -1.271565 | 1.542913  | 1.842780  |
| C  | -2.744001 | 3.474562  | 0.444986  |
| C  | -2.640900 | 1.659177  | 2.077962  |
| C  | -3.361611 | 2.630826  | 1.371193  |
| H  | -4.436203 | 2.732299  | 1.550886  |
| Cu | 0.311656  | -0.682535 | 0.106216  |
| N  | 2.626678  | 1.205870  | 0.227952  |
| N  | 0.745043  | 2.195348  | 0.651104  |
| C  | -0.807356 | -1.657947 | -1.438614 |



|   |           |           |           |
|---|-----------|-----------|-----------|
| C | 0.241365  | -0.898350 | -2.063450 |
| H | 3.271968  | 0.521313  | -2.632356 |
| H | 1.449883  | 4.010548  | -0.202024 |
| H | 3.716239  | 2.713074  | 1.244396  |
| H | -0.616595 | -2.730673 | -1.357833 |
| C | 0.012583  | 0.497569  | -2.477931 |
| C | 1.496096  | -1.585721 | -2.394531 |
| O | 1.133758  | 1.155007  | -2.804177 |
| O | -1.067028 | 1.056467  | -2.486036 |
| O | 2.451956  | -1.137450 | -3.005954 |
| O | 1.540268  | -2.841084 | -1.907341 |
| C | 2.727582  | -3.578121 | -2.143943 |
| H | 2.912116  | -3.696572 | -3.220727 |
| H | 2.573941  | -4.557894 | -1.678846 |
| H | 3.597076  | -3.081254 | -1.689021 |
| C | 1.012938  | 2.537030  | -3.072941 |
| H | 0.418744  | 2.719086  | -3.979971 |
| H | 2.035989  | 2.904559  | -3.207104 |
| H | 0.530836  | 3.054274  | -2.230657 |
| C | 3.553798  | 0.128474  | -0.091281 |
| H | 2.925633  | -0.662466 | -0.518856 |
| C | 4.207746  | -0.448107 | 1.150490  |
| C | 5.238571  | 0.215036  | 1.827142  |
| C | 3.744133  | -1.666450 | 1.660464  |
| C | 5.785024  | -0.324995 | 2.991349  |
| H | 5.628772  | 1.162590  | 1.447550  |
| C | 4.288228  | -2.208711 | 2.823681  |
| H | 2.941421  | -2.195317 | 1.138605  |
| C | 5.310411  | -1.536666 | 3.493619  |
| H | 6.589545  | 0.203626  | 3.507443  |
| H | 3.911863  | -3.159602 | 3.207307  |
| H | 5.740155  | -1.958774 | 4.404572  |
| C | 4.554100  | 0.539275  | -1.179592 |
| H | 5.129696  | -0.369498 | -1.441788 |
| H | 5.281557  | 1.263853  | -0.778216 |
| O | 3.946771  | 1.132520  | -2.282164 |
| C | -2.076818 | -1.224287 | -1.027548 |
| H | -2.325214 | -0.166624 | -1.112352 |
| C | -2.998431 | -2.123955 | -0.475851 |
| H | -2.840657 | -3.178936 | -0.712229 |
| C | -4.415808 | -1.748131 | -0.260387 |
| C | -5.405040 | -2.741835 | -0.248424 |
| C | -4.806801 | -0.416897 | -0.047889 |
| C | -6.744101 | -2.418714 | -0.034267 |
| H | -5.119263 | -3.784755 | -0.410434 |
| C | -6.143316 | -0.093621 | 0.169106  |
| H | -4.056534 | 0.376272  | -0.032972 |
| C | -7.119385 | -1.092107 | 0.177277  |
| H | -7.498733 | -3.208356 | -0.032379 |
| H | -6.423680 | 0.949203  | 0.335937  |
| H | -8.167634 | -0.837758 | 0.348211  |
| C | -3.327689 | 0.776603  | 3.086135  |
| H | -2.655665 | -0.015017 | 3.445491  |
| H | -3.664371 | 1.360079  | 3.957379  |
| H | -4.218533 | 0.301248  | 2.647674  |
| C | -3.539811 | 4.484284  | -0.339826 |
| H | -4.522224 | 4.665264  | 0.117499  |
| H | -3.009465 | 5.444943  | -0.412637 |
| H | -3.709068 | 4.125240  | -1.367406 |
| H | -0.877238 | 3.972405  | -0.516841 |
| H | -0.683356 | 0.805049  | 2.389476  |
| C | -0.084798 | -1.773153 | 1.767661  |
| H | 0.738167  | -1.717067 | 2.481522  |
| C | -1.244705 | -2.273912 | 1.824499  |
| C | -2.541372 | -2.633669 | 1.613644  |
| H | -2.783260 | -3.693567 | 1.493511  |
| H | -3.315183 | -2.030353 | 2.097322  |

83

Figure\_S15-9\_PA-9b-ts(1,6major)\_02 / electronic energy: -3519.31441637 a.u. / lowest freq: -439.92 cm-1

|    |           |           |           |
|----|-----------|-----------|-----------|
| C  | -2.736778 | 2.980363  | -0.100816 |
| H  | -3.290936 | 3.283679  | 0.795415  |
| C  | -1.325690 | 3.576136  | -0.149421 |
| H  | -1.204588 | 4.344022  | -0.925176 |
| C  | -1.184069 | 1.246358  | -0.307451 |
| C  | 0.887946  | 2.481105  | -0.706873 |
| C  | 1.678369  | 3.409484  | -0.031224 |
| C  | 1.463842  | 1.634344  | -1.660251 |
| C  | 3.057121  | 3.474558  | -0.272037 |
| C  | 2.831896  | 1.686408  | -1.919360 |
| C  | 3.616634  | 2.608887  | -1.213322 |
| H  | 4.691530  | 2.657028  | -1.411590 |
| Cu | -0.444180 | -0.604290 | -0.219012 |
| N  | -2.455482 | 1.544289  | -0.059072 |
| N  | -0.501014 | 2.398433  | -0.448224 |
| C  | 0.435762  | -1.900086 | 1.218416  |
| C  | -0.632618 | -1.219439 | 1.898582  |
| H  | -3.184290 | 0.995915  | 2.637551  |
| H  | -1.037244 | 4.013654  | 0.819465  |
| H  | -3.325204 | 3.232437  | -0.997558 |

|   |           |           |           |
|---|-----------|-----------|-----------|
| H | 0.218940  | -2.945195 | 0.984524  |
| C | -0.517462 | 0.086993  | 2.556672  |
| C | -1.904101 | -1.944340 | 2.087930  |
| O | 0.733423  | 0.574841  | 2.556386  |
| O | -1.424964 | 0.733899  | 3.049959  |
| O | -2.845490 | -1.597053 | 2.769282  |
| O | -1.957551 | -3.086945 | 1.367753  |
| C | -3.142634 | -3.855330 | 1.487274  |
| H | -3.335951 | -4.122765 | 2.535440  |
| H | -2.981264 | -4.760066 | 0.891056  |
| H | -4.010171 | -3.301152 | 1.099118  |
| C | 0.907953  | 1.887994  | 3.057037  |
| H | 0.235117  | 2.591313  | 2.546699  |
| H | 1.951759  | 2.153360  | 2.854963  |
| H | 0.707939  | 1.929800  | 4.137041  |
| C | -3.455591 | 0.510997  | 0.186955  |
| H | -2.900711 | -0.299747 | 0.670800  |
| C | -4.041833 | -0.044591 | -1.094581 |
| C | -4.879407 | 0.718366  | -1.916774 |
| C | -3.715293 | -1.347158 | -1.486729 |
| C | -5.374389 | 0.189689  | -3.108165 |
| H | -5.151130 | 1.737819  | -1.631291 |
| C | -4.211455 | -1.879969 | -2.676226 |
| H | -3.057242 | -1.949712 | -0.853606 |
| C | -5.041715 | -1.110684 | -3.490551 |
| H | -6.024979 | 0.796875  | -3.741363 |
| H | -3.946926 | -2.899249 | -2.966012 |
| H | -5.432321 | -1.524624 | -4.422711 |
| C | -4.511278 | 0.957082  | 1.201807  |
| H | -5.131194 | 0.064881  | 1.414832  |
| H | -5.184746 | 1.708522  | 0.755021  |
| O | -3.958882 | 1.517221  | 2.349744  |
| C | 1.739897  | -1.471776 | 0.916535  |
| H | 2.024453  | -0.441405 | 1.120700  |
| C | 2.666245  | -2.339930 | 0.327314  |
| H | 2.472099  | -3.408456 | 0.441140  |
| C | 4.097715  | -1.979969 | 0.209306  |
| C | 5.064789  | -2.992382 | 0.123656  |
| C | 4.527600  | -0.644509 | 0.167979  |
| C | 6.418320  | -2.683106 | 0.003386  |
| H | 4.748429  | -4.038722 | 0.151984  |
| C | 5.879017  | -0.334526 | 0.045129  |
| H | 3.798470  | 0.167014  | 0.209303  |
| C | 6.831970  | -1.351384 | -0.037876 |
| H | 7.155027  | -3.487132 | -0.058777 |
| H | 6.188947  | 0.712717  | 0.008848  |
| H | 7.891900  | -1.107581 | -0.136669 |
| C | 3.453643  | 0.784503  | -2.952253 |
| H | 2.718755  | 0.074429  | -3.356039 |
| H | 3.862651  | 1.368923  | -3.790931 |
| H | 4.286178  | 0.210218  | -2.517492 |
| C | 3.913745  | 4.435523  | 0.510591  |
| H | 4.889948  | 4.588341  | 0.030316  |
| H | 3.423661  | 5.414093  | 0.618524  |
| H | 4.098158  | 4.049088  | 1.525977  |
| H | 1.233087  | 4.080990  | 0.705571  |
| H | 0.832392  | 0.935985  | -2.209739 |
| C | -0.075076 | -1.564201 | -1.970953 |
| H | -0.883180 | -1.376076 | -2.679607 |
| C | 1.038597  | -2.156753 | -2.060294 |
| C | 2.286944  | -2.654392 | -1.852506 |
| H | 2.428016  | -3.737762 | -1.801674 |
| H | 3.137313  | -2.087412 | -2.242056 |

83

Figure\_S15-9\_PA-9b-ts(1,6major)\_03 / electronic energy: -3519.31189147 a.u. / lowest freq: -467.94 cm<sup>-1</sup>

|    |           |           |           |
|----|-----------|-----------|-----------|
| C  | -3.976361 | 1.354508  | -0.568416 |
| H  | -4.627860 | 1.502537  | 0.301363  |
| C  | -3.092496 | 2.572081  | -0.850211 |
| H  | -3.321589 | 3.058229  | -1.808424 |
| C  | -1.725989 | 0.712724  | -0.465939 |
| C  | -0.599486 | 2.800845  | -1.070907 |
| C  | -0.726658 | 4.191540  | -1.113607 |
| C  | 0.668798  | 2.225615  | -1.222340 |
| C  | 0.402109  | 5.008860  | -1.256547 |
| C  | 1.804903  | 3.021304  | -1.336824 |
| C  | 1.660198  | 4.414752  | -1.352122 |
| H  | 2.548064  | 5.045593  | -1.449256 |
| Cu | -0.182296 | -0.477893 | -0.052127 |
| N  | -2.981651 | 0.318268  | -0.279402 |
| N  | -1.740982 | 1.998222  | -0.867239 |
| C  | 1.225957  | -1.069610 | 1.462714  |
| C  | 0.296434  | -0.102188 | 1.984524  |
| H  | -3.554070 | -0.084617 | 2.493840  |
| H  | -3.170620 | 3.324975  | -0.051257 |
| H  | -4.597084 | 1.072655  | -1.432922 |
| H  | 0.939438  | -2.111539 | 1.626861  |
| C  | 0.671149  | 1.328824  | 2.049965  |
| C  | -0.914731 | -0.588386 | 2.658957  |
| O  | -0.356499 | 2.164352  | 2.227716  |

|   |           |           |           |
|---|-----------|-----------|-----------|
| O | 1.808264  | 1.740744  | 1.930127  |
| O | -1.823254 | 0.078644  | 3.124858  |
| O | -0.971097 | -1.937176 | 2.707128  |
| C | -2.033792 | -2.521156 | 3.441096  |
| H | -1.937818 | -2.292136 | 4.512137  |
| H | -1.954917 | -3.601835 | 3.281909  |
| H | -3.012194 | -2.162365 | 3.094852  |
| C | -0.035532 | 3.542873  | 2.306289  |
| H | 0.582401  | 3.752549  | 3.191823  |
| H | -0.991738 | 4.072137  | 2.385126  |
| H | 0.504816  | 3.872453  | 1.407734  |
| C | -3.319294 | -1.026353 | 0.150636  |
| H | -2.463293 | -1.374183 | 0.749726  |
| C | -3.469359 | -2.017112 | -0.992433 |
| C | -3.468843 | -3.386952 | -0.702236 |
| C | -3.571919 | -1.614116 | -2.326252 |
| C | -3.580887 | -4.331600 | -1.719336 |
| H | -3.357420 | -3.723097 | 0.332269  |
| C | -3.683010 | -2.558993 | -3.347456 |
| H | -3.540295 | -0.553998 | -2.583063 |
| C | -3.691057 | -3.919843 | -3.048055 |
| H | -3.570250 | -5.395877 | -1.474554 |
| H | -3.758125 | -2.225188 | -4.384612 |
| H | -3.772486 | -4.659261 | -3.847401 |
| C | -4.548219 | -1.013557 | 1.072578  |
| H | -4.694914 | -2.046923 | 1.439191  |
| H | -5.447187 | -0.764725 | 0.484668  |
| O | -4.452476 | -0.090220 | 2.114251  |
| C | 2.500341  | -0.874524 | 0.909290  |
| H | 2.880615  | 0.140232  | 0.800819  |
| C | 3.232428  | -1.965060 | 0.430161  |
| H | 2.900836  | -2.946675 | 0.780563  |
| C | 4.685837  | -1.888716 | 0.143992  |
| C | 5.460735  | -3.056044 | 0.206519  |
| C | 5.324305  | -0.686954 | -0.199014 |
| C | 6.829535  | -3.025904 | -0.055404 |
| H | 4.980406  | -4.003066 | 0.467582  |
| C | 6.691211  | -0.655159 | -0.461688 |
| H | 4.746859  | 0.236038  | -0.267823 |
| C | 7.451768  | -1.823991 | -0.390677 |
| H | 7.412246  | -3.948004 | 0.004019  |
| H | 7.167752  | 0.292004  | -0.724441 |
| H | 8.524145  | -1.796269 | -0.595674 |
| C | 3.165662  | 2.383082  | -1.401271 |
| H | 3.114491  | 1.370988  | -1.828094 |
| H | 3.867888  | 2.980780  | -1.999153 |
| H | 3.579910  | 2.295757  | -0.383510 |
| C | 0.239906  | 6.506498  | -1.281708 |
| H | 1.201470  | 7.012477  | -1.441986 |
| H | -0.448343 | 6.816462  | -2.082721 |
| H | -0.181880 | 6.872237  | -0.332577 |
| H | -1.704213 | 4.664935  | -1.016169 |
| H | 0.783663  | 1.140691  | -1.263436 |
| C | 0.136172  | -1.690672 | -1.638628 |
| H | -0.731428 | -1.733308 | -2.298901 |
| C | 1.305884  | -2.167076 | -1.725879 |
| C | 2.615940  | -2.513350 | -1.587720 |
| H | 2.866229  | -3.567487 | -1.437644 |
| H | 3.352152  | -1.937594 | -2.157643 |

83

Figure\_S15-9\_PA-9b-ts(1,6major)\_04 / electronic energy: -3519.31309758 a.u. / lowest freq: -455.22 cm<sup>-1</sup>

|    |           |           |           |
|----|-----------|-----------|-----------|
| C  | 2.826531  | 2.804131  | -0.405111 |
| H  | 3.267875  | 2.896141  | -1.405534 |
| C  | 1.445247  | 3.467928  | -0.312313 |
| H  | 1.390389  | 4.249264  | 0.459319  |
| C  | 1.228641  | 1.169463  | 0.102230  |
| C  | -0.804097 | 2.509523  | 0.329667  |
| C  | -1.575513 | 3.392121  | -0.423527 |
| C  | -1.384013 | 1.807942  | 1.392908  |
| C  | -2.941478 | 3.548432  | -0.154337 |
| C  | -2.738683 | 1.954365  | 1.683552  |
| C  | -3.507285 | 2.822185  | 0.894791  |
| H  | -4.571965 | 2.943245  | 1.115569  |
| Cu | 0.414502  | -0.642231 | 0.234408  |
| N  | 2.516252  | 1.397458  | -0.135304 |
| N  | 0.572403  | 2.341669  | 0.044317  |
| C  | -0.592157 | -2.031673 | -1.017543 |
| C  | 0.452751  | -1.441032 | -1.810352 |
| H  | 3.235105  | 0.101526  | -2.714521 |
| H  | 1.140958  | 3.910764  | -1.271539 |
| H  | 3.539462  | 3.197478  | 0.335801  |
| H  | -0.378136 | -3.051496 | -0.688928 |
| C  | 0.317622  | -0.225835 | -2.629474 |
| C  | 1.712194  | -2.191823 | -1.956624 |
| O  | -0.892566 | 0.354220  | -2.515087 |
| O  | 1.166708  | 0.256216  | -3.350295 |
| O  | 2.731666  | -1.805867 | -2.500948 |
| O  | 1.672767  | -3.402052 | -1.372860 |
| C  | 2.872310  | -4.156513 | -1.386325 |

|   |           |           |           |
|---|-----------|-----------|-----------|
| H | 3.197778  | -4.362090 | -2.415645 |
| H | 2.647821  | -5.095466 | -0.868830 |
| H | 3.678130  | -3.622998 | -0.861224 |
| C | -1.090682 | 1.548088  | -3.248384 |
| H | -0.337903 | 2.302363  | -2.978402 |
| H | -2.091434 | 1.906613  | -2.982699 |
| H | -1.028231 | 1.362741  | -4.330264 |
| C | 3.513082  | 0.344237  | -0.145263 |
| H | 2.957784  | -0.581477 | -0.353067 |
| C | 4.206707  | 0.166454  | 1.197589  |
| C | 3.886997  | 0.956322  | 2.306308  |
| C | 5.169991  | -0.840437 | 1.353256  |
| C | 4.522883  | 0.759707  | 3.533080  |
| H | 3.120737  | 1.728822  | 2.223661  |
| C | 5.805759  | -1.038487 | 2.576956  |
| H | 5.420543  | -1.492649 | 0.513212  |
| C | 5.487904  | -0.235149 | 3.672765  |
| H | 4.256005  | 1.389109  | 4.385010  |
| H | 6.552046  | -1.829926 | 2.675506  |
| H | 5.985007  | -0.390404 | 4.632616  |
| C | 4.503864  | 0.536569  | -1.309062 |
| H | 5.136524  | -0.367757 | -1.362604 |
| H | 5.176375  | 1.380256  | -1.079063 |
| O | 3.873050  | 0.812607  | -2.515947 |
| C | -1.873534 | -1.551831 | -0.697643 |
| H | -2.156754 | -0.544555 | -0.996913 |
| C | -2.770154 | -2.336904 | 0.037176  |
| H | -2.581803 | -3.412730 | 0.040644  |
| C | -4.196529 | -1.962382 | 0.176513  |
| C | -5.151070 | -2.955801 | 0.440202  |
| C | -4.634564 | -0.633707 | 0.062670  |
| C | -6.499872 | -2.635899 | 0.583248  |
| H | -4.828041 | -3.996049 | 0.535961  |
| C | -5.981423 | -0.312651 | 0.207791  |
| H | -3.914778 | 0.166599  | -0.120763 |
| C | -6.921663 | -1.311128 | 0.468566  |
| H | -7.226148 | -3.426109 | 0.786336  |
| H | -6.297868 | 0.729455  | 0.118975  |
| H | -7.977787 | -1.058239 | 0.583840  |
| C | -3.361344 | 1.218456  | 2.840384  |
| H | -2.633835 | 0.556285  | 3.329786  |
| H | -3.744324 | 1.923682  | 3.594079  |
| H | -4.211602 | 0.605768  | 2.503117  |
| C | -3.777456 | 4.463300  | -1.011122 |
| H | -4.765735 | 4.639915  | -0.565236 |
| H | -3.284708 | 5.436099  | -1.155493 |
| H | -3.933361 | 4.025597  | -2.010099 |
| H | -1.124850 | 3.952651  | -1.244921 |
| H | -0.765532 | 1.150041  | 2.003893  |
| C | 0.108771  | -1.367783 | 2.103924  |
| H | 0.947794  | -1.116528 | 2.754652  |
| C | -1.017308 | -1.907128 | 2.304998  |
| C | -2.289622 | -2.380371 | 2.208866  |
| H | -2.465977 | -3.455115 | 2.309010  |
| H | -3.100551 | -1.737141 | 2.562776  |

83

Figure\_S15-9\_PA-9b-ts(1,6major)\_05 / electronic energy: -3519.31462563 a.u. / lowest freq: -460.87 cm-1

|    |           |           |           |
|----|-----------|-----------|-----------|
| C  | 2.924243  | 2.689380  | 0.047145  |
| H  | 3.274692  | 2.896331  | -0.973731 |
| C  | 1.587210  | 3.373715  | 0.359440  |
| H  | 1.582695  | 3.877731  | 1.338476  |
| C  | 1.274970  | 1.051882  | 0.300819  |
| C  | -0.733473 | 2.395459  | 0.637051  |
| C  | -1.497232 | 3.250428  | -0.152595 |
| C  | -1.327590 | 1.683134  | 1.682394  |
| C  | -2.870037 | 3.390320  | 0.080624  |
| C  | -2.695122 | 1.799532  | 1.928577  |
| C  | -3.449691 | 2.661012  | 1.121383  |
| H  | -4.523062 | 2.761602  | 1.308732  |
| Cu | 0.320818  | -0.689263 | 0.163577  |
| N  | 2.580475  | 1.267521  | 0.157418  |
| N  | 0.655149  | 2.239422  | 0.381980  |
| C  | -0.794994 | -1.799385 | -1.282294 |
| C  | 0.246978  | -1.087729 | -1.971877 |
| H  | 3.255528  | 0.316958  | -2.615629 |
| H  | 1.304582  | 4.111090  | -0.404353 |
| H  | 3.717609  | 2.965745  | 0.756236  |
| H  | -0.599291 | -2.861579 | -1.119262 |
| C  | 0.008884  | 0.269070  | -2.497557 |
| C  | 1.501640  | -1.798241 | -2.257261 |
| O  | 1.122293  | 0.898412  | -2.896229 |
| O  | -1.073645 | 0.820335  | -2.542524 |
| O  | 2.489032  | -1.367038 | -2.831073 |
| O  | 1.503222  | -3.055324 | -1.778264 |
| C  | 2.689695  | -3.808311 | -1.959614 |
| H  | 2.908163  | -3.949598 | -3.027405 |
| H  | 2.510634  | -4.777620 | -1.481934 |
| H  | 3.548499  | -3.310765 | -1.486482 |
| C  | 0.992094  | 2.248403  | -3.293186 |

|   |           |           |           |
|---|-----------|-----------|-----------|
| H | 0.312664  | 2.351029  | -4.151110 |
| H | 2.001797  | 2.578895  | -3.559551 |
| H | 0.604430  | 2.858769  | -2.464301 |
| C | 3.542280  | 0.200317  | -0.038512 |
| H | 2.955816  | -0.668145 | -0.373528 |
| C | 4.260269  | -0.202907 | 1.240878  |
| C | 4.056913  | 0.466739  | 2.451020  |
| C | 5.136425  | -1.297053 | 1.222371  |
| C | 4.724575  | 0.066172  | 3.609605  |
| H | 3.355655  | 1.301721  | 2.499299  |
| C | 5.803622  | -1.698631 | 2.377175  |
| H | 5.292503  | -1.854902 | 0.295687  |
| C | 5.603307  | -1.014462 | 3.576855  |
| H | 4.550246  | 0.601812  | 4.545397  |
| H | 6.480631  | -2.554987 | 2.341009  |
| H | 6.124043  | -1.328808 | 4.483815  |
| C | 4.529088  | 0.544804  | -1.171843 |
| H | 5.154360  | -0.348556 | -1.351825 |
| H | 5.211351  | 1.340561  | -0.828962 |
| O | 3.902501  | 0.990413  | -2.330508 |
| C | -2.063436 | -1.339477 | -0.895008 |
| H | -2.320936 | -0.294734 | -1.068166 |
| C | -2.970141 | -2.196182 | -0.258231 |
| H | -2.796788 | -3.266058 | -0.396583 |
| C | -4.391638 | -1.824935 | -0.066547 |
| C | -5.364043 | -2.829194 | 0.044332  |
| C | -4.803980 | -0.486486 | 0.024423  |
| C | -6.707095 | -2.509388 | 0.237174  |
| H | -5.061391 | -3.877804 | -0.023513 |
| C | -6.144335 | -0.166139 | 0.220336  |
| H | -4.067019 | 0.316439  | -0.039378 |
| C | -7.103613 | -1.175156 | 0.327765  |
| H | -7.448657 | -3.307491 | 0.316883  |
| H | -6.441429 | 0.882977  | 0.292422  |
| H | -8.154957 | -0.923098 | 0.482248  |
| C | -3.348487 | 1.031660  | 3.047003  |
| H | -2.657778 | 0.296299  | 3.482604  |
| H | -3.678735 | 1.708686  | 3.850313  |
| H | -4.239373 | 0.496510  | 2.683734  |
| C | -3.703303 | 4.274211  | -0.810061 |
| H | -4.697336 | 4.456354  | -0.379160 |
| H | -3.216031 | 5.245742  | -0.978838 |
| H | -3.844782 | 3.803397  | -1.795822 |
| H | -1.031779 | 3.791501  | -0.979166 |
| H | -0.713052 | 1.028077  | 2.301426  |
| C | -0.039794 | -1.633788 | 1.917222  |
| H | 0.797813  | -1.519194 | 2.606701  |
| C | -1.198984 | -2.125711 | 2.035958  |
| C | -2.498488 | -2.500196 | 1.875505  |
| H | -2.745063 | -3.565611 | 1.854801  |
| H | -3.266870 | -1.850848 | 2.305375  |
